# Supplementary material
Source: PubMed Central journal article supplement (PMC2817639)
Supplement: blood-2009-06-227017_2.pdf [file blood-2009-06-227017_2.pdf]

| ID           | qChIP Primer sequence (5'-3') |
|--------------|-------------------------------|
| ABL2_F       | TGAGATCTACAGCACGATTTTATG      |
| ABL2_R       | GGATTGTTTTCTAAGTTGTGGTTC      |
| ABL2_CTR_F2  | ctggcctacaacgcctctt           |
| ABL2_CTR_R2  | agcaaaaagcccaatcttg           |
| BCL6_F       | ACGCTCTGCTTATGAGGA            |
| BCL6_R       | CGGCAGCAACAGCAATAA            |
| BTK_F        | ACTGAGATAGGGCGCTTCAG          |
| BTK_R        | ACCGAATTTGGCAAGAATGA          |
| ELL2_F       | CATGTGTCCACCCAATTCTG          |
| ELL2_R       | CCCTGGTTTACTGGGAGTGT          |
| IL3RA_F      | TGCCTGTATAGCCAGCAAGA          |
| IL3RA_R      | CAGCAGCTTCGTAACCATGA          |
| MTA2_F       | CGCTGAGATGTGAAAGTGA           |
| MTA2_R       | GCGCTAGAGCGGACAATTAC          |
| NRAS_F       | GCTCAAATAAAGATTTTGCCAAG       |
| NRAS_R       | CCTCCCTACCATCTGGCTAC          |
| OR8H1_F      | TCTTTCATTTTTTATTGTGGCTAA      |
| OR8H1_R      | TCAGCTATTGGCAACTTGAGAG        |
| OR8H1_CTR_F1 | gcttctccaccatcccagta          |
| OR8H1_CTR_R1 | tgtggaccaattccaatga           |
| PEX7_F       | GCTGCGTGGTTTCAGAGTC           |
| PEX7_R       | TTTTGTGCTTGCATCTCAGC          |
| PEX7_CTR_F1  | ccaggctggtctcaaactct          |
| PEX7_CTR_R1  | cttctccaccatgcttta            |
| RAB30_F      | GCAGGAGTCAAGTGGTGGTT          |
| RAB30_R      | CCTACATCAGTCCCCAGCAT          |
| SMARCAL1_F   | TGTGCCATTTTGTATGGATG          |
| SMARCAL1_R   | TCCTGGGAAAATAAGGAGCA          |
| STAMPB_F     | TACATGCAGAACGTGCCATT          |
| STAMPB_R     | accgcaccagATGAGACTA           |
| TTF1_F       | CCCAGAAGACGGGGAAAC            |
| TTF1_R       | GCTTCCTCAACAGCAGCACT          |
| ARL6IP5_F2   | TTCCATTGTGGGGTAAGTGG          |
| ARL6IP5_R2   | CTCAAGTCTCAGCCCTTGGT          |
| BCL2_F4      | CGGAGTTTAATCAGAAGAGGATTC      |
| BCL2_R6      | TTCGAGAAGTCCCTGTGATG          |
| CDK8_F2      | TCATTGTGCAGCCCTTATCA          |
| CDK8_R2      | GTGGGAAGGAGAGTCGTTTG          |
| CHML1_F1     | CAGGACTCCATTCCCTGTGGT         |
| CHML1_R1     | CTCCCTCCAACCTTTCACGAG         |
| HSPA6_F2     | GTCTCCTTTCCAGGTGTT            |
| HSPA6_R2     | GCATTGGTGGTTCAGTGGTATG        |
| MTMR4_F1     | CCAACGCCAGAATAGGAGAA          |

|               |                       |
|---------------|-----------------------|
| MTMR4_R1      | AACTGCAGGGTCGTTTATCG  |
| SUB1_F2       | TGAAGTGGGGTAGGAAGACC  |
| SUB1_R1       | GACGCGAAAGTCAGATGTTG  |
| SLC25A30_F2   | CTCCCAGCCGTTTCTCTTATT |
| SLC25A30_R1   | CCCGGCTTTTTGTAAAGTCTG |
| ZNF575_F1     | ACTGCTCGGGAAGAATGCTA  |
| ZNF575_R1     | GCCCAATAAAAGGCACGTTA  |
| PGM2L1_F1     | GTTCCCCCTTCTCTCAAAG   |
| PGM2L1_R2     | ctgagggattgaggcgatag  |
| PGM2L1_CTR_F1 | cggggaccaagaaggatatt  |
| PGM2L1_CTR_R1 | gagaccagaacctcaaaa    |
| CFLAR_F1      | TGGCACGCAGTAGAACAAAG  |
| CFLAR_R1      | CCTACTGGTTTCACCCCTCA  |
| IFNAR2_F1     | GCGTTGATTCAGTGGTGAGA  |
| IFNAR2_R1     | AAGCCTGCACAGGTGGATAG  |
| IFNGR1_F1     | TTTAAAGGGAAGCTGGCAGA  |
| IFNGR1_R1     | AGCCTGTGTGTGTGGAACAA  |
| IL2RG_F1      | TTTCCATCCTCCCAAACAG   |
| IL2RG_R1      | GCACCATTCTCAACCACCTT  |
| IL2RG_F2      | CATGGCATAGAACGGTGATG  |
| IL2RG_R2      | TGACACGGGCTAAGTCTCT   |
| IL7R_F2       | TGTCCCCTTCAGTTGGATTC  |
| IL7R_R2       | CCCAGGTGTAAAGCAAATCG  |
| IRF7_F5       | ACCTCCCATTACCCACTTCC  |
| IRF7_R5       | CGCCGCCTGTTCTTATTATT  |
| JAK3_F2       | GCATCGGTGACATCAAAGTG  |
| JAK3_R2       | TCTTGATGATGTGCCGGTAA  |
| MYD88_F1      | GCCGAGGCTCTAATTCCTCT  |
| MYD88_R1      | AAGCCCAAATTCCTGTCTT   |
| NFKBIE_F2     | AGAGCTGGCAGGACCCTTA   |
| NFKBIE_R2     | CCGACTGGCAACCTGTAACT  |
| PPP3R1_F1     | GGGGAAGCCCTAGTCGTTAG  |
| PPP3R1_R1     | AAATTACCCACCGTCAACCA  |
| PTPN6_F1      | GTCTGTTCTCGACGCCTAC   |
| PTPN6_R1      | GCACGAATTGCAGCATCTTA  |
| STAT1_F2      | CCCTTTCATCAGTCACGTT   |
| STAT1_R2      | TACTGACCTGCCACCTTG TG |
| STAT5A_F1     | ACTCACCATGTGACCACGAA  |
| STAT5A_R1     | TTCCATAAGGCCAGTTCACC  |
| TGFBR2_F1     | CTGCCCTCAAGAAATTTGGA  |
| TGFBR2_R1     | AAGCTTTCCTCACCTCCAT   |
| TGFBR2_F2     | GCTAGCTTGCACTTGGAAT   |
| TGFBR2_R2     | TGGTGGTCTTTGCCATGATA  |
| TLR1_F1       | GTCTGTGGGGAAAAACAGGA  |
| TLR1_R1       | CCCTGAGACCCATAACTGGA  |
| TLR7_F1       | ATCGGCAGAAAGAGACCTCA  |
| TLR7_R1       | TCCACTGACCCCCACTCTAC  |

|              |                        |
|--------------|------------------------|
| TLR9_F2      | TCTGGAGTGACGTGGTGTGT   |
| TLR9_R2      | GGGTGTAGCTTGAGCAGGAG   |
| TNFRSF10B_F1 | TCAGAGTGGGGAAGTGTGTG   |
| TNFRSF10B_R1 | CCCATGAACTCCAATGCTT    |
| TNFRSF1B_F2  | GGTGTGTGTCAGGTCCACTG   |
| TNFRSF1B_R2  | GGAGACTTCATTTGCCTTGC   |
| ACTB_F       | AGCGCGGCTACAGCTTCA     |
| ACTB_R       | CGTAGCACAGCTTCTCCTTAAT |

| ID              | qRT-PCR Primer sequence (5'-3') |
|-----------------|---------------------------------|
| BCL6_RT_F       | CGCAACTCTGAAGAGCCACCTGCG        |
| BCL6_RT_F       | TTTGTGACGGAAATGCAGGTTA          |
| HSPA6_RT_F1     | gaggtggagaggatggtca             |
| HSPA6_RT_R1     | tgtcctcttcggaatctg              |
| ZNF575_RT_F1    | gactaggCGGGGCTACCGATCCTAGtC     |
| ZNF575_RT_R1    | AGCTGACTGGCTGGGCTTCT            |
| SLC25A30_RT_F2  | GGTTGAGACTTGGTCCTTGGAA          |
| SLC25A30_RT_R2  | cgagcCCAATTTCTTCAACTGCTcG       |
| SUB1_RT_F2      | caacctcCAGTGATTCTGACAGTGAGGtTG  |
| SUB1_RT_R2      | GGGCTCTCGAAGTCTCACCTG           |
| PGM2L1_RT_F1    | cggttTGATTACTGCCTCTCACAAcG      |
| PGM2L1_RT_R1    | TGTGATCTGAGCACCAAGTTTCC         |
| IL7R_RT_F2      | TGGACGCATGTGAATTTATCCAG         |
| IL7R_RT_R2      | cggcTTAATCTCATACATTGCTGCcG      |
| IFNAR2_RT_F1    | TCAGCCTCGTGTTTGGTATTTCA         |
| IFNAR2_RT_R1    | cggtcTCCCATGATAAGATGGACcG       |
| LYN_RT_F2       | TCTCCGAGTCACTCATGTGCAA          |
| LYN_RT_R2       | cggcGTTGATTGCTTCTGGAGCcG        |
| IL10RA_RT_F2    | ACCCATCCCAAATCAGTCTGAAA         |
| IL10RA_RT_R2    | cgctcTATTCCATACCTCAGGAGcG       |
| PPP3R1_RT_F1    | cggaaGAAATTGAGGTTTGCTTTCcG      |
| PPP3R1_RT_R1    | CACCATCATCTTCAATACCTGGAA        |
| PPP3CA_RT_F2    | cgaagaCAGAGGGTGCATCAATTCTTcG    |
| PPP3CA_RT_R2    | AGTGACTGGCGCATCAATATCC          |
| TLR9_RT_F2      | GAAGACTTCAGGCCCAACTGC           |
| TLR9_RT_R2      | cggaaACGGTCACCAGGTTGTTcG        |
| JAK3_RT_F2      | cggcAGTGCATGGCCTATGAGCcG        |
| JAK3_RT_R2      | GCTATTGAGGTCACGAATGACG          |
| TNFRSF10B_RT_F2 | cggctTAGGAGTCACAGTTGCAGCcG      |
| TNFRSF10B_RT_R2 | CCACCTGAGCAGATGCCTTTC           |
| NFKBIE_RT_F2    | GCAAGGTCTGGCTTGTCTCCAC          |
| NFKBIE_RT_R2    | cactcaGAAGCAGCAATTCATGAGtG      |
| IL2RG_RT_F1     | cgaaaGAATACCACGGGAACTTTTcG      |
| IL2RG_RT_R1     | TGACGAGGCAGAGTCGTTTCC           |
| STAT5A_RT_F2    | cggcTCAACAGGGAGAACTTGCCcG       |
| STAT5A_RT_R2    | GGCTTGTGGTGTCTTCAACA            |
| IFNGR1_RT_F1    | cgggaAGGAAGTCGATTATGATCCcG      |

|                |                                |
|----------------|--------------------------------|
| IFNGR1_RT_R1   | TCTCACTCCGTTCACTCTCACA         |
| CFLAR_RT_F1    | cgaagaCAATGAGACAGAGCTTCTTcG    |
| CFLAR_RT_R1    | AGCTGTCTCGTAGTCTCGGTGCTC       |
| MYD88_RT_F2    | tgcaagcaaggaatgtgac            |
| MYD88_RT_R2    | acctggagagaggctgagtg           |
| TNFRSF1B_RT_F4 | cgctcgCCAGGAACTGAAACATCAGAcG   |
| TNFRSF1B_RT_R4 | CGTGGATGAAGTCGTGTTGGAG         |
| TLR1_RT_F1     | tattgggcaccctacaaaa            |
| TLR1_RT_R1     | aatggcaaaatggaagatgc           |
| PTPN6_RT_F1    | cggttAGAGAACAAGGGCAAGAAcG      |
| PTPN6_RT_R1    | CAGGATCACTCGGCTGTGGT           |
| TLR7_RT_F2     | CCTCTATTTCTGGGATGTGTGG         |
| TLR7_RT_R2     | cgctaaGCAACAGTCTGGTGATATTAGAcG |
| IRF7_RT_F2     | TTCGACTTCAGAGTCTTCTTCCAA       |
| IRF7_RT_R2     | cgctatGAAGCCCAGGTAGATGGTATAGcG |
| TGFBR2_RT_F1   | CGACCAGAAATCCCAGCTTCT          |
| TGFBR2_RT_R1   | cgttgTCCCAGCACTCAGTCAAcG       |
| STAT1_RT_F1    | TCTCCAACGTCAGCCAGCTC           |
| STAT1_RT_R1    | cggaaGGACAGATTCTGGGTCCcG       |

| ID            | Luciferase constructs Primer sequence (5'-3')                     |
|---------------|-------------------------------------------------------------------|
| PGM2L1_LUC_F1 | TATCAGGCGCGCCGCTGAGGGGATCTGAAATGA                                 |
| PGM2L1_LUC_R1 | TCATTGATATCGTCTCTGGGCGAAGTGA CTG                                  |
| PGM2L1_M1_R1  | accacttgtccccttactatgtcattcctgtttgcttggcggccaggccacacagcgc        |
| PGM2L1_M2_F1  | gcagatcgaggaaggagaccctggcaaacggcgaagaaccgtgcactattgcctcaccacc     |
| PGM2L1_M3_F3  | CGCGCTCCCGGGCTCCAGTCTAGAACTTCGGGGACTTGGGTCAGCAAGGGCGGGAAG<br>GGGC |
| PGM2L1-M3-F4  | gcagatcgaggaaggagaccctggcaaacggcggcgaagaaccgtgcactattgcctcaccacc  |
| PGM2L1-M3-R4  | cgcgacacaccgggaccgcccggcttcttactgtatcattcccctgtttcacca            |
| PGM2L1-M4-F1  | TTTCTTgTGcGtccAGGGGGAACGCGGAGCTGCTGGG                             |
| PGM2L1-M4-R1  | ccctggacgcacaagaaaagatctacctcgagtag                               |
| PGM2L1-M3-F5  | gcgctgtgtggccctggcggccggccaacaaggaatgacatagtaaggggacaaagtgt       |
