# Supplementary material
Source: PubMed Central journal article supplement (PMC2817639)
Supplement: blood-2009-06-227017_3.pdf [file blood-2009-06-227017_3.pdf]

| GeneID | Symbol   | Name                                                                                              | ChIP FDR | Down Regulated | ARACNe target | M0042+M2+M0 | M0  | Inr | ChIP-chip (Ci et al. 2009) | Down Regulated (Ci et al. 2009) |
|--------|----------|---------------------------------------------------------------------------------------------------|----------|----------------|---------------|-------------|-----|-----|----------------------------|---------------------------------|
| 9937   | DCLRE1A  | DNA cross-link repair 1A (PSO2 homolog, <i>S. cerevisiae</i> )                                    | 7.73E-37 | No             | No            | Yes         | No  | No  | Yes                        | No                              |
| 374354 | NHLRC2   | NHL repeat containing 2                                                                           | 7.73E-37 | No             | No            | Yes         | No  | No  | No                         | No                              |
| 29979  | UBQLN1   | ubiquilin 1                                                                                       | 3.30E-36 | No             | No            | Yes         | No  | No  | Yes                        | No                              |
| 6897   | TARS     | threonyl-tRNA synthetase                                                                          | 1.65E-32 | Yes            | No            | No          | Yes | No  | Yes                        | Yes                             |
| 400    | ARL1     | ADP-ribosylation factor-like 1                                                                    | 1.68E-32 | No             | No            | Yes         | No  | No  | Yes                        | No                              |
| 8295   | TRRAP    | transformation/transcription domain-associated protein                                            | 2.27E-32 | No             | No            | Yes         | No  | No  | No                         | No                              |
| 8364   | HIST1H4C | histone cluster 1, H4c                                                                            | 1.39E-31 | NA*            | Yes           | Yes         | No  | No  | Yes                        | No                              |
| 92797  | HELB     | helicase (DNA) B                                                                                  | 3.56E-31 | Yes            | No            | No          | Yes | No  | Yes                        | No                              |
| 7419   | VDAC3    | voltage-dependent anion channel 3                                                                 | 1.50E-30 | No             | No            | Yes         | No  | No  | No                         | No                              |
| 5106   | PCK2     | phosphoenolpyruvate carboxykinase 2 (mitochondrial)                                               | 4.84E-30 | Yes            | Yes           | No          | Yes | No  | No                         | No                              |
| 1105   | CHD1     | chromodomain helicase DNA binding protein 1                                                       | 5.12E-30 | Yes            | Yes           | Yes         | No  | No  | No                         | No                              |
| 8417   | STX7     | syntaxin 7                                                                                        | 5.16E-30 | No             | No            | Yes         | No  | No  | Yes                        | No                              |
| 79798  | ARMCS    | armadillo repeat containing 5                                                                     | 9.42E-30 | No             | No            | Yes         | No  | No  | Yes                        | No                              |
| 9739   | SETD1A   | SET domain containing 1A                                                                          | 1.08E-29 | No             | No            | Yes         | No  | No  | Yes                        | No                              |
| 127255 | LRRIQ3   | leucine-rich repeats and IQ motif containing 3                                                    | 1.84E-29 | Yes            | Yes           | Yes         | No  | No  | Yes                        | No                              |
| 7867   | MAPKAPK3 | mitogen-activated protein kinase-activated protein kinase 3                                       | 2.01E-29 | Yes            | No            | No          | Yes | No  | Yes                        | Yes                             |
| 1154   | CISH     | cytokine inducible SH2-containing protein                                                         | 2.01E-29 | Yes            | No            | No          | Yes | No  | Yes                        | No                              |
| 7525   | YES1     | y-yes-1 Yamaguchi sarcoma viral oncogene homolog 1                                                | 2.49E-29 | Yes            | No            | Yes         | No  | No  | Yes                        | No                              |
| 6605   | SMARCE1  | SWI/SNF related, matrix associated, actin dependent regulator of chromatin, subfamily e, member 1 | 4.92E-29 | No             | No            | Yes         | No  | No  | Yes                        | No                              |
| 6571   | SLC18A2  | solute carrier family 18 (vesicular monoamine), member 2                                          | 5.16E-29 | No             | No            | Yes         | No  | No  | No                         | No                              |
| 3758   | KCNJ1    | potassium inwardly-rectifying channel, subfamily J, member 1                                      | 5.84E-29 | No             | No            | Yes         | No  | No  | Yes                        | No                              |
| 3646   | EIF3E    | eukaryotic translation initiation factor 3, subunit E                                             | 1.55E-28 | No             | No            | Yes         | No  | No  | Yes                        | Yes                             |
| 6138   | RPL15    | ribosomal protein L15                                                                             | 7.27E-28 | Yes            | No            | No          | Yes | No  | Yes                        | No                              |
| 6887   | TAL2     | T-cell acute lymphocytic leukemia 2                                                               | 1.09E-27 | Yes            | No            | Yes         | No  | No  | Yes                        | No                              |
| 147798 | TMC4     | transmembrane channel-like 4                                                                      | 1.36E-27 | No             | No            | No          | Yes | No  | No                         | No                              |
| 6730   | SRP68    | signal recognition particle 68kDa                                                                 | 4.00E-27 | No             | No            | Yes         | No  | No  | No                         | No                              |
| 604    | BCL6     | B-cell CLL/lymphoma 6 (zinc finger protein 51)                                                    | 4.13E-27 | No             | No            | Yes         | No  | No  | Yes                        | No                              |
| 124626 | ZBPB2    | zona pellucida binding protein 2                                                                  | 2.51E-26 | No             | No            | No          | Yes | No  | No                         | No                              |
| 22806  | IKZF3    | IKAROS family zinc finger 3 (Aiolos)                                                              | 2.51E-26 | No             | No            | Yes         | No  | No  | No                         | No                              |
| 7551   | ZNF3     | zinc finger protein 3                                                                             | 3.12E-26 | Yes            | No            | Yes         | No  | No  | Yes                        | Yes                             |
| 10980  | COPS6    | COP9 constitutive photomorphogenic homolog subunit 6 ( <i>Arabidopsis</i> )                       | 3.12E-26 | No             | No            | Yes         | No  | No  | Yes                        | No                              |
| 10614  | HEXIM1   | hexamethylene bis-acetamide inducible 1                                                           | 8.91E-26 | Yes            | No            | Yes         | No  | No  | Yes                        | Yes                             |
| 1106   | CHD2     | chromodomain helicase DNA binding protein 2                                                       | 5.29E-25 | Yes            | Yes           | Yes         | No  | No  | No                         | No                              |

|        |          |                                                                                           |          |     |     |     |     |     |     |     |
|--------|----------|-------------------------------------------------------------------------------------------|----------|-----|-----|-----|-----|-----|-----|-----|
| 969    | CD69     | CD69 molecule                                                                             | 8.25E-25 | Yes | No  | Yes | No  | No  | Yes | Yes |
| 9019   | MPZL1    | myelin protein zero-like 1                                                                | 1.46E-24 | No  | Yes | Yes | No  | No  | Yes | No  |
| 143684 | FAM76B   | family with sequence similarity 76, member B                                              | 2.16E-24 | No  | No  | No  | No  | Yes | Yes | No  |
| 9702   | CEP57    | centrosomal protein 57kDa                                                                 | 2.16E-24 | No  | No  | Yes | No  | No  | Yes | No  |
| 10957  | PNRC1    | proline-rich nuclear receptor coactivator 1                                               | 3.22E-24 | Yes | No  | No  | Yes | No  | Yes | Yes |
| 10469  | TIMM44   | translocase of inner mitochondrial membrane 44 homolog (yeast)                            | 7.48E-24 | No  | No  | Yes | No  | No  | Yes | No  |
| 115426 | UHRF2    | ubiquitin-like, containing PHD and RING finger domains, 2                                 | 8.52E-24 | No  | No  | No  | Yes | No  | Yes | No  |
| 54883  | CDC49    | coiled-coil domain containing 49                                                          | 1.10E-23 | No  | No  | No  | Yes | No  | Yes | No  |
| 1122   | CHML     | choroideremia-like (Rab escort protein 2)                                                 | 1.18E-23 | Yes | Yes | Yes | No  | No  | Yes | Yes |
| 8357   | HIST1H3H | histone cluster 1, H3h                                                                    | 1.45E-23 | No  | No  | Yes | No  | No  | No  | No  |
| 202    | AIM1     | absent in melanoma 1                                                                      | 1.52E-23 | No  | No  | No  | Yes | No  | Yes | No  |
| 8835   | SOCS2    | suppressor of cytokine signaling 2                                                        | 2.26E-23 | No  | No  | No  | Yes | No  | Yes | No  |
| 6774   | STAT3    | signal transducer and activator of transcription 3 (acute-phase response factor)          | 4.06E-23 | Yes | No  | Yes | No  | No  | Yes | Yes |
| 9924   | PAN2     | PAN2 polyA specific ribonuclease subunit homolog (S. cerevisiae)                          | 4.11E-23 | No  | No  | Yes | No  | No  | Yes | No  |
| 80146  | UXS1     | UDP-glucuronate decarboxylase 1                                                           | 4.12E-23 | Yes | No  | Yes | No  | No  | Yes | No  |
| 51465  | UBE2J1   | ubiquitin-conjugating enzyme E2, J1 (UBC6 homolog, yeast)                                 | 4.20E-23 | No  | No  | Yes | No  | No  | No  | No  |
| 25973  | PARS2    | prolyl-tRNA synthetase 2, mitochondrial (putative)                                        | 4.41E-23 | No  | No  | Yes | No  | No  | Yes | No  |
| 196743 | PAOX     | polyamine oxidase (exo-N4-amino)                                                          | 8.76E-23 | Yes | Yes | Yes | No  | No  | No  | No  |
| 57003  | CDC47    | coiled-coil domain containing 47                                                          | 9.64E-23 | No  | No  | Yes | No  | No  | No  | No  |
| 11325  | DDX42    | DEAD (Asp-Glu-Ala-Asp) box polypeptide 42                                                 | 9.64E-23 | No  | No  | Yes | No  | No  | No  | No  |
| 26994  | RNF11    | ring finger protein 11                                                                    | 1.40E-22 | Yes | No  | No  | Yes | No  | Yes | Yes |
| 9962   | SLC23A2  | solute carrier family 23 (nucleobase transporters), member 2                              | 2.01E-22 | No  | No  | Yes | No  | No  | No  | No  |
| 3184   | HNRNPD   | heterogeneous nuclear ribonucleoprotein D (AU-rich element RNA binding protein 1, 37kDa)  | 3.98E-22 | No  | No  | Yes | No  | No  | Yes | No  |
| 9844   | ELMO1    | engulfment and cell motility 1                                                            | 5.46E-22 | No  | No  | Yes | No  | No  | No  | No  |
| 6433   | SFRS8    | splicing factor, arginine/serine-rich 8 (suppressor-of-white-apricot homolog, Drosophila) | 7.81E-22 | No  | No  | Yes | No  | No  | Yes | No  |
| 399    | RHOH     | ras homolog gene family, member H                                                         | 7.84E-22 | No  | No  | No  | Yes | No  | Yes | No  |
| 6626   | SNRPA    | small nuclear ribonucleoprotein polypeptide A                                             | 7.86E-22 | No  | No  | Yes | No  | No  | No  | No  |
| 1606   | DGKA     | diacylglycerol kinase, alpha 80kDa                                                        | 9.29E-22 | Yes | No  | No  | Yes | No  | No  | No  |
| 84305  | WIBG     | within bgcn homolog (Drosophila)                                                          | 9.29E-22 | No  | No  | Yes | No  | No  | Yes | No  |
| 501    | ALDH7A1  | aldehyde dehydrogenase 7 family, member A1                                                | 9.96E-22 | No  | No  | Yes | No  | No  | No  | No  |
| 60560  | MAK10    | MAK10 homolog, amino-acid N-acetyltransferase subunit (S. cerevisiae)                     | 1.00E-21 | No  | No  | Yes | No  | No  | Yes | No  |
| 23077  | MYCBP2   | MYC binding protein 2                                                                     | 1.00E-21 | Yes | No  | Yes | No  | No  | No  | No  |
| 160365 | CLECL1   | C-type lectin-like 1                                                                      | 1.07E-21 | Yes | No  | Yes | No  | No  | No  | No  |
| 57007  | CXCR7    | chemokine (C-X-C motif) receptor 7                                                        | 1.20E-21 | No  | No  | No  | Yes | No  | No  | No  |

|        |           |                                                                                           |          |     |     |     |     |     |     |     |
|--------|-----------|-------------------------------------------------------------------------------------------|----------|-----|-----|-----|-----|-----|-----|-----|
| 55900  | ZNF302    | zinc finger protein 302                                                                   | 1.35E-21 | Yes | No  | Yes | No  | No  | Yes | No  |
| 267    | AMFR      | autocrine motility factor receptor                                                        | 1.59E-21 | No  | Yes | No  | No  | Yes | No  | No  |
| 84128  | WDR75     | WD repeat domain 75                                                                       | 1.99E-21 | No  | No  | Yes | No  | No  | Yes | No  |
| 8365   | HIST1H4H  | histone cluster 1, H4h                                                                    | 2.44E-21 | No  | Yes | Yes | No  | No  | Yes | No  |
| 2867   | FFAR2     | free fatty acid receptor 2                                                                | 3.58E-21 | No  | No  | Yes | No  | No  | No  | No  |
| 8564   | KMO       | kynurenine 3-monooxygenase (kynurenine 3-hydroxylase)                                     | 7.34E-21 | Yes | No  | Yes | No  | No  | Yes | Yes |
| 7625   | ZNF74     | zinc finger protein 74                                                                    | 8.58E-21 | No  | No  | No  | Yes | No  | Yes | No  |
| 51762  | RAB8B     | RAB8B, member RAS oncogene family                                                         | 1.09E-20 | No  | No  | Yes | No  | No  | No  | No  |
| 7903   | ST6SIA4   | ST6 alpha-N-acetyl-neuraminide alpha-2,8-sialyltransferase 4                              | 1.32E-20 | No  | No  | Yes | No  | No  | Yes | No  |
| 942    | CD86      | CD86 molecule                                                                             | 1.35E-20 | No  | No  | No  | Yes | No  | No  | No  |
| 8793   | TNFRSF10D | tumor necrosis factor receptor superfamily, member 10d, decoy with truncated death domain | 1.46E-20 | Yes | No  | No  | Yes | No  | No  | No  |
| 7110   | TMF1      | TATA element modulatory factor 1                                                          | 1.67E-20 | No  | No  | Yes | No  | No  | Yes | No  |
| 11180  | WDR6      | WD repeat domain 6                                                                        | 2.59E-20 | Yes | No  | No  | Yes | No  | Yes | No  |
| 113201 | CASC4     | cancer susceptibility candidate 4                                                         | 2.77E-20 | Yes | No  | No  | No  | No  | Yes | No  |
| 79188  | TMEM43    | transmembrane protein 43                                                                  | 3.01E-20 | Yes | No  | No  | Yes | No  | No  | No  |
| 131474 | CHCHD4    | coiled-coil-helix-coiled-coil-helix domain containing 4                                   | 3.01E-20 | No  | No  | No  | Yes | No  | No  | No  |
| 10923  | SUB1      | SUB1 homolog (S. cerevisiae)                                                              | 3.87E-20 | Yes | Yes | Yes | No  | No  | Yes | Yes |
| 29780  | PARVB     | parvin, beta                                                                              | 4.92E-20 | Yes | Yes | No  | Yes | No  | No  | No  |
| 3183   | HNRNPC    | heterogeneous nuclear ribonucleoprotein C (C1/C2)                                         | 4.97E-20 | No  | No  | Yes | No  | No  | No  | No  |
| 103    | ADAR      | adenosine deaminase, RNA-specific                                                         | 5.30E-20 | No  | No  | Yes | No  | No  | No  | No  |
| 10724  | MGEA5     | meningioma expressed antigen 5 (hyaluronidase)                                            | 6.15E-20 | No  | No  | Yes | No  | No  | Yes | No  |
| 284346 | ZNF575    | zinc finger protein 575                                                                   | 6.64E-20 | Yes | Yes | Yes | No  | No  | Yes | No  |
| 23474  | ETHE1     | ethylmalonic encephalopathy 1                                                             | 6.64E-20 | Yes | Yes | Yes | No  | No  | No  | No  |
| 7770   | ZNF227    | zinc finger protein 227                                                                   | 7.18E-20 | Yes | No  | No  | Yes | No  | No  | No  |
| 5869   | RAB5B     | RAB5B, member RAS oncogene family                                                         | 8.31E-20 | No  | No  | Yes | No  | No  | No  | No  |
| 54797  | MED18     | mediator complex subunit 18                                                               | 9.14E-20 | No  | No  | Yes | No  | No  | Yes | No  |
| 10300  | KATNB1    | katanin p80 (WD repeat containing) subunit B 1                                            | 1.10E-19 | No  | No  | Yes | No  | No  | No  | No  |
| 92906  | HNRPLL    | heterogeneous nuclear ribonucleoprotein L-like                                            | 1.14E-19 | No  | No  | No  | Yes | No  | No  | No  |
| 5128   | PCTK2     | PCTAIRE protein kinase 2                                                                  | 1.17E-19 | No  | No  | Yes | No  | No  | Yes | No  |
| 57561  | ARRDC3    | arrestin domain containing 3                                                              | 1.33E-19 | Yes | No  | Yes | No  | No  | Yes | No  |
| 7248   | TSC1      | tuberous sclerosis 1                                                                      | 2.04E-19 | No  | No  | Yes | No  | No  | No  | No  |
| 5013   | OTX1      | orthodenticle homeobox 1                                                                  | 2.62E-19 | No  | No  | Yes | No  | No  | Yes | No  |
| 23660  | ZKSCAN5   | zinc finger with KRAB and SCAN domains 5                                                  | 3.33E-19 | No  | No  | Yes | No  | No  | Yes | No  |
| 29896  | TRA2A     | transformer-2 alpha                                                                       | 3.40E-19 | No  | No  | Yes | No  | No  | Yes | No  |

|        |           |                                                                                 |          |     |     |     |     |    |     |     |
|--------|-----------|---------------------------------------------------------------------------------|----------|-----|-----|-----|-----|----|-----|-----|
| 7073   | TIAL1     | TIA1 cytotoxic granule-associated RNA binding protein-like 1                    | 5.54E-19 | No  | No  | No  | Yes | No | No  | No  |
| 2027   | ENO3      | enolase 3 (beta, muscle)                                                        | 8.67E-19 | No  | No  | No  | Yes | No | Yes | No  |
| 5216   | PFN1      | profilin 1                                                                      | 8.67E-19 | No  | No  | No  | Yes | No | Yes | No  |
| 283416 | C12orf61  | chromosome 12 open reading frame 61                                             | 1.31E-18 | No  | No  | No  | No  | No | Yes | No  |
| 283237 | TTC9C     | tetratricopeptide repeat domain 9C                                              | 1.47E-18 | Yes | No  | No  | Yes | No | No  | No  |
| 64710  | NUCKS1    | nuclear casein kinase and cyclin-dependent kinase substrate 1                   | 1.48E-18 | No  | Yes | Yes | No  | No | Yes | No  |
| 161742 | SPRED1    | sprouty-related, EVH1 domain containing 1                                       | 1.49E-18 | No  | No  | No  | Yes | No | No  | No  |
| 51537  | MTP18     | mitochondrial protein 18 kDa                                                    | 1.60E-18 | No  | No  | Yes | No  | No | Yes | No  |
| 1968   | EIF2S3    | eukaryotic translation initiation factor 2, subunit 3 gamma, 52kDa              | 1.67E-18 | No  | No  | Yes | No  | No | Yes | No  |
| 3603   | IL16      | interleukin 16 (lymphocyte chemoattractant factor)                              | 1.73E-18 | Yes | No  | Yes | No  | No | No  | No  |
| 28232  | SLCO3A1   | solute carrier organic anion transporter family, member 3A1                     | 1.85E-18 | No  | Yes | No  | Yes | No | No  | No  |
| 7314   | UBB       | ubiquitin B                                                                     | 1.93E-18 | No  | No  | Yes | No  | No | Yes | No  |
| 65008  | MRPL1     | mitochondrial ribosomal protein L1                                              | 2.02E-18 | No  | No  | Yes | No  | No | Yes | No  |
| 51167  | CYB5R4    | cytochrome b5 reductase 4                                                       | 2.55E-18 | No  | No  | Yes | No  | No | Yes | No  |
| 378    | ARF4      | ADP-ribosylation factor 4                                                       | 2.56E-18 | No  | No  | Yes | No  | No | No  | No  |
| 55133  | SRBD1     | S1 RNA binding domain 1                                                         | 3.51E-18 | No  | No  | Yes | No  | No | Yes | No  |
| 64288  | ZNF323    | zinc finger protein 323                                                         | 3.92E-18 | Yes | No  | No  | Yes | No | No  | No  |
| 23283  | CSTF2T    | cleavage stimulation factor, 3' pre-RNA, subunit 2, 64kDa, tau variant          | 4.16E-18 | No  | Yes | Yes | No  | No | Yes | No  |
| 54737  | MPHOSPH8  | M-phase phosphoprotein 8                                                        | 4.78E-18 | Yes | No  | Yes | No  | No | Yes | No  |
| 2931   | GSK3A     | glycogen synthase kinase 3 alpha                                                | 4.98E-18 | No  | No  | No  | Yes | No | Yes | No  |
| 55114  | ARHGAP17  | Rho GTPase activating protein 17                                                | 5.11E-18 | No  | No  | Yes | No  | No | No  | No  |
| 10261  | IGSF6     | immunoglobulin superfamily, member 6                                            | 5.53E-18 | No  | No  | Yes | No  | No | No  | No  |
| 7917   | BAT3      | HLA-B associated transcript 3                                                   | 5.53E-18 | No  | No  | Yes | No  | No | Yes | No  |
| 55937  | APOM      | apolipoprotein M                                                                | 5.53E-18 | No  | No  | Yes | No  | No | No  | No  |
| 931    | MSA1      | membrane-spanning 4-domains, subfamily A, member 1                              | 8.03E-18 | No  | No  | No  | No  | No | Yes | No  |
| 8994   | LIMD1     | LIM domains containing 1                                                        | 8.55E-18 | Yes | Yes | No  | Yes | No | No  | No  |
| 6641   | SNTB1     | syntrophin, beta 1 (dystrophin-associated protein A1, 59kDa, basic component 1) | 8.89E-18 | Yes | No  | Yes | No  | No | No  | No  |
| 56478  | EIF4ENIF1 | eukaryotic translation initiation factor 4E nuclear import factor 1             | 9.66E-18 | No  | No  | Yes | No  | No | Yes | No  |
| 9814   | SFI1      | Sfi1 homolog, spindle assembly associated (yeast)                               | 9.66E-18 | No  | No  | No  | Yes | No | No  | No  |
| 4076   | CAPRIN1   | cell cycle associated protein 1                                                 | 1.11E-17 | No  | No  | No  | Yes | No | No  | No  |
| 51279  | C1RL      | complement component 1, r subcomponent-like                                     | 1.20E-17 | No  | No  | No  | Yes | No | Yes | No  |
| 10472  | ZNF238    | zinc finger protein 238                                                         | 1.40E-17 | Yes | No  | Yes | No  | No | Yes | Yes |
| 3021   | H3F3B     | H3 histone, family 3B (H3.3B)                                                   | 1.81E-17 | No  | No  | Yes | No  | No | Yes | No  |
| 55608  | ANKRD10   | ankyrin repeat domain 10                                                        | 1.82E-17 | Yes | No  | No  | Yes | No | Yes | No  |

|        |           |                                                             |          |     |     |     |     |     |     |     |
|--------|-----------|-------------------------------------------------------------|----------|-----|-----|-----|-----|-----|-----|-----|
| 27004  | TCL6      | T-cell leukemia/lymphoma 6                                  | 1.87E-17 | No  | Yes | No  | Yes | No  | Yes | No  |
| 5788   | PTPRC     | protein tyrosine phosphatase, receptor type, C              | 2.12E-17 | No  | No  | Yes | No  | No  | No  | No  |
| 51714  | SELT      | selenoprotein T                                             | 2.14E-17 | No  | No  | No  | Yes | No  | No  | No  |
| 9824   | ARHGAP11A | Rho GTPase activating protein 11A                           | 2.14E-17 | No  | No  | Yes | No  | No  | Yes | No  |
| 2271   | FH        | fumarate hydratase                                          | 2.21E-17 | No  | No  | Yes | No  | No  | Yes | No  |
| 9197   | SLC33A1   | solute carrier family 33 (acetyl-CoA transporter), member 1 | 2.41E-17 | No  | No  | No  | Yes | No  | Yes | No  |
| 263512 | SLC25A30  | solute carrier family 25, member 30                         | 2.41E-17 | Yes | Yes | Yes | No  | No  | No  | No  |
| 7163   | TPD52     | tumor protein D52                                           | 2.42E-17 | No  | Yes | Yes | No  | No  | No  | No  |
| 5074   | PAWR      | PRKC, apoptosis, WT1, regulator                             | 3.31E-17 | No  | No  | Yes | No  | No  | Yes | No  |
| 7266   | DNAJC7    | DnaJ (Hsp40) homolog, subfamily C, member 7                 | 3.38E-17 | No  | No  | No  | Yes | No  | Yes | No  |
| 28511  | NKIRAS2   | NFKB inhibitor interacting Ras-like 2                       | 3.38E-17 | No  | No  | No  | Yes | No  | Yes | No  |
| 7862   | BRPF1     | bromodomain and PHD finger containing, 1                    | 3.96E-17 | No  | No  | No  | Yes | No  | Yes | No  |
| 55016  | MARCH1    | membrane-associated ring finger (C3HC4) 1                   | 5.17E-17 | NA  | No  | Yes | No  | No  | No  | No  |
| 3006   | HIST1H1C  | histone cluster 1, H1c                                      | 5.24E-17 | No  | No  | Yes | No  | No  | No  | No  |
| 4033   | LRMP      | lymphoid-restricted membrane protein                        | 5.57E-17 | No  | Yes | Yes | No  | No  | No  | No  |
| 2495   | FBX1      | ferritin, heavy polypeptide 1                               | 5.59E-17 | Yes | No  | No  | Yes | No  | Yes | Yes |
| 7316   | UBC       | ubiquitin C                                                 | 5.84E-17 | No  | No  | Yes | No  | No  | Yes | No  |
| 92922  | CCDC102A  | coiled-coil domain containing 102A                          | 6.37E-17 | No  | Yes | No  | No  | No  | Yes | No  |
| 221188 | GPR114    | G protein-coupled receptor 114                              | 6.37E-17 | No  | No  | No  | Yes | No  | No  | No  |
| 26000  | TBC1D10B  | TBC1 domain family, member 10B                              | 6.73E-17 | Yes | No  | No  | Yes | No  | No  | No  |
| 3899   | AFF3      | AF4/FMR2 family, member 3                                   | 7.07E-17 | Yes | No  | No  | Yes | No  | Yes | No  |
| 23253  | ANKRD12   | ankyrin repeat domain 12                                    | 7.39E-17 | Yes | No  | Yes | No  | No  | No  | No  |
| 117289 | TAGAP     | T-cell activation RhoGTPase activating protein              | 7.58E-17 | No  | No  | Yes | No  | No  | No  | No  |
| 5195   | PEX14     | peroxisomal biogenesis factor 14                            | 9.23E-17 | No  | No  | Yes | No  | No  | Yes | No  |
| 1676   | DFFA      | DNA fragmentation factor, 45kDa, alpha polypeptide          | 9.23E-17 | No  | No  | Yes | No  | No  | No  | No  |
| 80777  | CYB5B     | cytochrome b5 type B (outer mitochondrial membrane)         | 1.01E-16 | No  | No  | No  | Yes | No  | Yes | No  |
| 64805  | P2RY12    | purinergic receptor P2Y, G-protein coupled, 12              | 1.01E-16 | No  | Yes | No  | Yes | No  | No  | No  |
| 5451   | POU2F1    | POU class 2 homeobox 1                                      | 1.02E-16 | No  | No  | Yes | No  | No  | No  | No  |
| 7762   | ZNF215    | zinc finger protein 215                                     | 1.02E-16 | No  | No  | Yes | No  | No  | Yes | No  |
| 114034 | TOE1      | target of EGR1, member 1 (nuclear)                          | 1.09E-16 | No  | No  | No  | No  | Yes | No  | No  |
| 3658   | IREB2     | iron-responsive element binding protein 2                   | 1.09E-16 | Yes | No  | Yes | No  | No  | Yes | No  |
| 7391   | USF1      | upstream transcription factor 1                             | 1.14E-16 | No  | No  | No  | Yes | No  | Yes | No  |
| 56548  | CHST7     | carbohydrate (N-acetylglucosamine 6-O) sulfotransferase 7   | 1.18E-16 | Yes | No  | Yes | No  | No  | Yes | No  |
| 64783  | RBM15     | RNA binding motif protein 15                                | 1.34E-16 | No  | No  | Yes | No  | No  | No  | No  |

|        |              |                                                                                           |          |     |     |     |     |    |     |     |
|--------|--------------|-------------------------------------------------------------------------------------------|----------|-----|-----|-----|-----|----|-----|-----|
| 2870   | GRK6         | G protein-coupled receptor kinase 6                                                       | 1.35E-16 | Yes | No  | No  | Yes | No | No  | No  |
| 65080  | MRPL44       | mitochondrial ribosomal protein L44                                                       | 1.58E-16 | No  | No  | No  | Yes | No | Yes | No  |
| 51669  | TMEM66       | transmembrane protein 66                                                                  | 1.69E-16 | Yes | No  | No  | Yes | No | Yes | Yes |
| 11163  | NUDT4        | nudix (nucleoside diphosphate linked moiety X)-type motif 4                               | 1.90E-16 | Yes | Yes | Yes | No  | No | No  | No  |
| 2959   | GTF2B        | general transcription factor IIB                                                          | 1.97E-16 | No  | No  | Yes | No  | No | Yes | No  |
| 6668   | SP2          | Sp2 transcription factor                                                                  | 2.09E-16 | No  | Yes | No  | No  | No | No  | No  |
| 8343   | HIST1H2BF    | histone cluster 1, H2bf                                                                   | 2.19E-16 | Yes | No  | Yes | No  | No | No  | No  |
| 3013   | HIST1H2AD    | histone cluster 1, H2ad                                                                   | 2.19E-16 | No  | No  | Yes | No  | No | No  | No  |
| 11165  | NUDT3        | nudix (nucleoside diphosphate linked moiety X)-type motif 3                               | 2.28E-16 | No  | No  | Yes | No  | No | No  | No  |
| 26092  | TOR1AIP1     | tor1A interacting protein 1                                                               | 2.31E-16 | Yes | Yes | Yes | No  | No | Yes | Yes |
| 1520   | CTSS         | cathepsin S                                                                               | 2.43E-16 | Yes | No  | Yes | No  | No | No  | No  |
| 7185   | TRAF1        | TNF receptor-associated factor 1                                                          | 2.45E-16 | No  | No  | Yes | No  | No | Yes | No  |
| 29928  | TIMM22       | translocase of inner mitochondrial membrane 22 homolog (yeast)                            | 2.60E-16 | No  | No  | No  | Yes | No | Yes | No  |
| 64859  | OBFC2A       | oligonucleotide/oligosaccharide-binding fold containing 2A                                | 2.64E-16 | Yes | No  | No  | Yes | No | Yes | No  |
| 79668  | PARP8        | poly (ADP-ribose) polymerase family, member 8                                             | 2.78E-16 | No  | No  | Yes | No  | No | Yes | No  |
| 30844  | EHD4         | EH-domain containing 4                                                                    | 2.79E-16 | No  | Yes | Yes | No  | No | No  | No  |
| 56261  | RP5-1022P6.2 | hypothetical protein KIAA1434                                                             | 2.79E-16 | No  | No  | Yes | No  | No | Yes | No  |
| 10308  | ZNF267       | zinc finger protein 267                                                                   | 2.82E-16 | No  | No  | No  | Yes | No | No  | No  |
| 55233  | MOBK1B       | MOB1, Mps One Binder kinase activator-like 1B (yeast)                                     | 3.17E-16 | No  | No  | No  | Yes | No | No  | No  |
| 79831  | JMJD5        | jumonji domain containing 5                                                               | 3.24E-16 | No  | Yes | Yes | No  | No | No  | No  |
| 64332  | NFKBIZ       | nuclear factor of kappa light polypeptide gene enhancer in B-cells inhibitor, zeta        | 3.81E-16 | Yes | No  | Yes | No  | No | No  | No  |
| 8464   | SUPT3H       | suppressor of Ty 3 homolog (S. cerevisiae)                                                | 3.98E-16 | Yes | No  | Yes | No  | No | Yes | No  |
| 1058   | CENPA        | centromere protein A                                                                      | 4.49E-16 | No  | No  | Yes | No  | No | Yes | No  |
| 3399   | ID3          | inhibitor of DNA binding 3, dominant negative helix-loop-helix protein                    | 4.53E-16 | Yes | No  | Yes | No  | No | Yes | Yes |
| 91523  | FAM113B      | family with sequence similarity 113, member B                                             | 4.58E-16 | Yes | No  | Yes | No  | No | Yes | No  |
| 55766  | H2AFJ        | H2A histone family, member J                                                              | 4.85E-16 | No  | No  | Yes | No  | No | No  | No  |
| 121504 | HIST4H4      | histone cluster 4, H4                                                                     | 4.85E-16 | NA* | Yes | Yes | No  | No | Yes | No  |
| 57507  | ZNF608       | zinc finger protein 608                                                                   | 5.40E-16 | No  | Yes | Yes | No  | No | Yes | No  |
| 196528 | ARID2        | AT rich interactive domain 2 (ARID, RFX-like)                                             | 5.62E-16 | No  | No  | Yes | No  | No | No  | No  |
| 54495  | TXNDC10      | thioredoxin domain containing 10                                                          | 5.63E-16 | No  | No  | Yes | No  | No | Yes | No  |
| 85364  | ZCCHC3       | zinc finger, CCHC domain containing 3                                                     | 5.68E-16 | Yes | No  | Yes | No  | No | Yes | No  |
| 92335  | LYK5         | protein kinase LYK5                                                                       | 5.98E-16 | No  | No  | No  | No  | No | Yes | No  |
| 7710   | ZNF154       | zinc finger protein 154                                                                   | 6.46E-16 | Yes | No  | Yes | No  | No | Yes | Yes |
| 3782   | KCNN3        | potassium intermediate/small conductance calcium-activated channel, subfamily N, member 3 | 6.84E-16 | No  | No  | No  | Yes | No | No  | No  |

|        |            |                                                                     |          |     |     |     |     |     |     |     |
|--------|------------|---------------------------------------------------------------------|----------|-----|-----|-----|-----|-----|-----|-----|
| 7329   | UBE2I      | ubiquitin-conjugating enzyme E2I (UBC9 homolog, yeast)              | 6.90E-16 | Yes | No  | Yes | No  | No  | Yes | No  |
| 57620  | STIM2      | stromal interaction molecule 2                                      | 7.69E-16 | No  | No  | Yes | No  | No  | Yes | No  |
| 817    | CAMK2D     | calcium/calmodulin-dependent protein kinase (CaM kinase) II delta   | 8.01E-16 | Yes | No  | Yes | No  | No  | No  | No  |
| 123263 | MTFMT      | mitochondrial methionyl-tRNA formyltransferase                      | 8.43E-16 | No  | No  | Yes | No  | No  | No  | No  |
| 132158 | GLYCTK     | glycerate kinase                                                    | 9.04E-16 | No  | Yes | Yes | No  | No  | No  | No  |
| 2595   | GANC       | glucosidase, alpha; neutral C                                       | 9.10E-16 | Yes | No  | Yes | No  | No  | Yes | No  |
| 26019  | UPF2       | UPF2 regulator of nonsense transcripts homolog (yeast)              | 9.55E-16 | Yes | No  | Yes | No  | No  | No  | No  |
| 8405   | SPOP       | speckle-type POZ protein                                            | 1.01E-15 | Yes | No  | No  | Yes | No  | No  | No  |
| 8604   | SLC25A12   | solute carrier family 25 (mitochondrial carrier, Aralar), member 12 | 1.02E-15 | No  | No  | Yes | No  | No  | No  | No  |
| 124961 | ZFP3       | zinc finger protein 3 homolog (mouse)                               | 1.02E-15 | No  | No  | No  | Yes | No  | Yes | No  |
| 81552  | ECOP       | EGFR-coamplified and overexpressed protein                          | 1.16E-15 | No  | No  | Yes | No  | No  | No  | No  |
| 90324  | CCDC97     | coiled-coil domain containing 97                                    | 1.18E-15 | Yes | No  | Yes | No  | No  | Yes | No  |
| 3359   | HTR3A      | 5-hydroxytryptamine (serotonin) receptor 3A                         | 1.19E-15 | No  | Yes | Yes | No  | No  | No  | No  |
| 55860  | ACTR10     | actin-related protein 10 homolog (S. cerevisiae)                    | 1.21E-15 | No  | No  | Yes | No  | No  | No  | No  |
| 157680 | VPS13B     | vacuolar protein sorting 13 homolog B (yeast)                       | 1.22E-15 | Yes | No  | Yes | No  | No  | No  | No  |
| 4920   | ROR2       | receptor tyrosine kinase-like orphan receptor 2                     | 1.29E-15 | Yes | No  | Yes | No  | No  | No  | No  |
| 55854  | ZC3H15     | zinc finger CCCH-type containing 15                                 | 1.31E-15 | No  | No  | No  | No  | Yes | Yes | No  |
| 201799 | TMEM154    | transmembrane protein 154                                           | 1.34E-15 | Yes | No  | Yes | No  | No  | No  | No  |
| 22929  | SEPHS1     | selenophosphate synthetase 1                                        | 1.41E-15 | No  | No  | Yes | No  | No  | No  | No  |
| 7799   | PRDM2      | PR domain containing 2, with ZNF domain                             | 1.42E-15 | Yes | No  | Yes | No  | No  | No  | No  |
| 54948  | MRPL16     | mitochondrial ribosomal protein L16                                 | 1.48E-15 | No  | No  | Yes | No  | No  | No  | No  |
| 5709   | PSMD3      | proteasome (prosome, macropain) 26S subunit, non-ATPase, 3          | 1.75E-15 | No  | No  | Yes | No  | No  | No  | No  |
| 7993   | UBXD6      | UBX domain containing 6                                             | 1.96E-15 | No  | No  | Yes | No  | No  | Yes | No  |
| 9839   | ZEB2       | zinc finger E-box binding homeobox 2                                | 1.99E-15 | Yes | No  | No  | Yes | No  | Yes | No  |
| 8115   | TCL1A      | T-cell leukemia/lymphoma 1A                                         | 2.03E-15 | No  | No  | No  | Yes | No  | No  | No  |
| 3394   | IRF8       | interferon regulatory factor 8                                      | 2.26E-15 | No  | No  | Yes | No  | No  | No  | No  |
| 533    | ATP6V0B    | ATPase, H+ transporting, lysosomal 21kDa, V0 subunit b              | 2.36E-15 | No  | No  | No  | Yes | No  | Yes | Yes |
| 8337   | HIST2H2AA3 | histone cluster 2, H2aa3                                            | 2.36E-15 | Yes | No  | No  | Yes | No  | Yes | Yes |
| 10961  | ERP29      | endoplasmic reticulum protein 29                                    | 2.39E-15 | Yes | No  | Yes | No  | No  | Yes | No  |
| 23180  | RFTN1      | raftlin, lipid raft linker 1                                        | 2.53E-15 | No  | Yes | Yes | No  | No  | Yes | No  |
| 84064  | HDHD2      | haloacid dehalogenase-like hydrolase domain containing 2            | 2.54E-15 | No  | No  | Yes | No  | No  | Yes | No  |
| 3983   | ABLIM1     | actin binding LIM protein 1                                         | 2.56E-15 | No  | No  | No  | Yes | No  | No  | No  |
| 10096  | ACTR3      | ARP3 actin-related protein 3 homolog (yeast)                        | 3.11E-15 | No  | No  | Yes | No  | No  | Yes | No  |
| 26520  | TIMM9      | translocase of inner mitochondrial membrane 9 homolog (yeast)       | 3.25E-15 | No  | No  | Yes | No  | No  | Yes | No  |

|        |          |                                                                                                                          |          |     |     |     |     |     |     |     |
|--------|----------|--------------------------------------------------------------------------------------------------------------------------|----------|-----|-----|-----|-----|-----|-----|-----|
| 10695  | CNPY3    | canopy 3 homolog (zebrafish)                                                                                             | 3.90E-15 | Yes | No  | No  | No  | Yes | No  | No  |
| 9026   | HIP1R    | huntingtin interacting protein 1 related                                                                                 | 3.96E-15 | No  | No  | No  | Yes | No  | No  | No  |
| 8535   | CBX4     | chromobox homolog 4 (Pc class homolog, Drosophila)                                                                       | 4.24E-15 | No  | No  | Yes | No  | No  | No  | No  |
| 83931  | STK40    | serine/threonine kinase 40                                                                                               | 4.65E-15 | No  | No  | No  | Yes | No  | No  | No  |
| 6651   | SON      | SON DNA binding protein                                                                                                  | 4.76E-15 | No  | No  | Yes | No  | No  | Yes | No  |
| 26985  | AP3M1    | adaptor-related protein complex 3, mu 1 subunit                                                                          | 4.76E-15 | Yes | No  | No  | Yes | No  | No  | No  |
| 26137  | ZBTB20   | zinc finger and BTB domain containing 20                                                                                 | 4.82E-15 | Yes | No  | Yes | No  | No  | Yes | No  |
| 2885   | GRB2     | growth factor receptor-bound protein 2                                                                                   | 5.41E-15 | No  | No  | Yes | No  | No  | Yes | No  |
| 54522  | ANKRD16  | ankyrin repeat domain 16                                                                                                 | 5.51E-15 | Yes | No  | Yes | No  | No  | No  | No  |
| 84285  | EIF1AD   | eukaryotic translation initiation factor 1A domain containing                                                            | 5.58E-15 | Yes | No  | No  | No  | Yes | Yes | No  |
| 121268 | RHEBL1   | Ras homolog enriched in brain like 1                                                                                     | 6.31E-15 | Yes | No  | Yes | No  | No  | Yes | No  |
| 8367   | HIST1H4E | histone cluster 1, H4e                                                                                                   | 6.36E-15 | No  | Yes | Yes | No  | No  | Yes | No  |
| 50801  | KCNK4    | potassium channel, subfamily K, member 4                                                                                 | 7.04E-15 | No  | No  | Yes | No  | No  | No  | No  |
| 6856   | SYPL1    | synaptophysin-like 1                                                                                                     | 8.74E-15 | No  | No  | Yes | No  | No  | Yes | No  |
| 23295  | MGRN1    | mahogunin, ring finger 1                                                                                                 | 9.43E-15 | No  | No  | Yes | No  | No  | No  | No  |
| 124402 | FAM100A  | family with sequence similarity 100, member A                                                                            | 9.43E-15 | No  | No  | Yes | No  | No  | No  | No  |
| 10456  | HAX1     | HCLS1 associated protein X-1                                                                                             | 9.88E-15 | No  | No  | No  | Yes | No  | Yes | No  |
| 8473   | OGT      | O-linked N-acetylglucosamine (GlcNAc) transferase (UDP-N-acetylglucosamine:polypeptide-N-acetylglucosaminyl transferase) | 9.97E-15 | No  | No  | Yes | No  | No  | No  | No  |
| 53916  | RAB4B    | RAB4B, member RAS oncogene family                                                                                        | 1.00E-14 | No  | No  | Yes | No  | No  | Yes | Yes |
| 6432   | SFRS7    | splicing factor, arginine/serine-rich 7, 35kDa                                                                           | 1.03E-14 | Yes | No  | No  | Yes | No  | Yes | No  |
| 7782   | SLC30A4  | solute carrier family 30 (zinc transporter), member 4                                                                    | 1.11E-14 | No  | Yes | Yes | No  | No  | No  | No  |
| 4026   | LPP      | LIM domain containing preferred translocation partner in lipoma                                                          | 1.13E-14 | No  | Yes | Yes | No  | No  | No  | No  |
| 25820  | ARIH1    | ariadne homolog, ubiquitin-conjugating enzyme E2 binding protein, 1 (Drosophila)                                         | 1.27E-14 | Yes | No  | No  | Yes | No  | No  | No  |
| 23635  | SSBP2    | single-stranded DNA binding protein 2                                                                                    | 1.33E-14 | No  | Yes | No  | Yes | No  | No  | No  |
| 901    | CCNG2    | cyclin G2                                                                                                                | 1.46E-14 | No  | Yes | Yes | No  | No  | No  | No  |
| 1997   | ELF1     | E74-like factor 1 (ets domain transcription factor)                                                                      | 1.46E-14 | No  | No  | Yes | No  | No  | No  | No  |
| 57565  | KLHL14   | kelch-like 14 (Drosophila)                                                                                               | 1.48E-14 | No  | No  | Yes | No  | No  | Yes | No  |
| 29982  | NRBF2    | nuclear receptor binding factor 2                                                                                        | 1.59E-14 | No  | No  | Yes | No  | No  | No  | No  |
| 9230   | RAB11B   | RAB11B, member RAS oncogene family                                                                                       | 1.69E-14 | No  | Yes | Yes | No  | No  | No  | No  |
| 64172  | OSGEPL1  | O-sialoglycoprotein endopeptidase-like 1                                                                                 | 1.70E-14 | Yes | Yes | Yes | No  | No  | No  | No  |
| 5334   | PLCL1    | phospholipase C-like 1                                                                                                   | 1.81E-14 | No  | No  | Yes | No  | No  | No  | No  |
| 9583   | ENTPD4   | ectonucleoside triphosphate diphosphohydrolase 4                                                                         | 1.81E-14 | No  | Yes | Yes | No  | No  | No  | No  |
| 54868  | TMEM104  | transmembrane protein 104                                                                                                | 1.96E-14 | Yes | No  | No  | Yes | No  | No  | No  |
| 28951  | TRIB2    | tribbles homolog 2 (Drosophila)                                                                                          | 1.97E-14 | No  | No  | Yes | No  | No  | No  | No  |



|        |           |                                                                                         |          |     |     |     |     |    |     |     |
|--------|-----------|-----------------------------------------------------------------------------------------|----------|-----|-----|-----|-----|----|-----|-----|
| 5026   | P2RX5     | purinergic receptor P2X, ligand-gated ion channel, 5                                    | 2.08E-14 | No  | No  | No  | Yes | No | No  | No  |
| 594    | BCKDHB    | branched chain keto acid dehydrogenase E1, beta polypeptide (maple syrup urine disease) | 2.12E-14 | No  | No  | Yes | No  | No | No  | No  |
| 669    | BPGM      | 2,3-bisphosphoglycerate mutase                                                          | 2.25E-14 | Yes | Yes | Yes | No  | No | Yes | Yes |
| 1407   | CRY1      | cryptochrome 1 (photolyase-like)                                                        | 2.32E-14 | Yes | No  | Yes | No  | No | No  | No  |
| 57592  | ZNF687    | zinc finger protein 687                                                                 | 2.34E-14 | No  | No  | Yes | No  | No | Yes | No  |
| 10109  | ARPC2     | actin related protein 2/3 complex, subunit 2, 34kDa                                     | 2.36E-14 | No  | No  | Yes | No  | No | Yes | No  |
| 7536   | SF1       | splicing factor 1                                                                       | 2.38E-14 | No  | No  | Yes | No  | No | No  | No  |
| 7456   | WIPF1     | WAS/WASL interacting protein family, member 1                                           | 2.42E-14 | No  | Yes | Yes | No  | No | No  | No  |
| 8726   | EED       | embryonic ectoderm development                                                          | 2.49E-14 | No  | No  | Yes | No  | No | Yes | No  |
| 3007   | HIST1H1D  | histone cluster 1, H1d                                                                  | 2.59E-14 | No  | No  | Yes | No  | No | Yes | No  |
| 8361   | HIST1H4F  | histone cluster 1, H4f                                                                  | 2.59E-14 | NA* | Yes | Yes | No  | No | No  | No  |
| 79074  | C2orf49   | chromosome 2 open reading frame 49                                                      | 2.80E-14 | No  | No  | Yes | No  | No | Yes | No  |
| 9392   | TGFBRAP1  | transforming growth factor, beta receptor associated protein 1                          | 2.80E-14 | No  | No  | Yes | No  | No | No  | No  |
| 2161   | F12       | coagulation factor XII (Hageman factor)                                                 | 2.97E-14 | No  | No  | No  | Yes | No | No  | No  |
| 10474  | TADA3L    | transcriptional adaptor 3 (NGG1 homolog, yeast)-like                                    | 3.32E-14 | No  | No  | Yes | No  | No | No  | No  |
| 7357   | UGCG      | UDP-glucose ceramide glucosyltransferase                                                | 3.40E-14 | No  | No  | Yes | No  | No | No  | No  |
| 22868  | FASTKD2   | FAST kinase domains 2                                                                   | 3.72E-14 | Yes | No  | Yes | No  | No | Yes | No  |
| 130752 | MDH1B     | malate dehydrogenase 1B, NAD (soluble)                                                  | 3.72E-14 | No  | No  | Yes | No  | No | Yes | No  |
| 84640  | USP38     | ubiquitin specific peptidase 38                                                         | 4.15E-14 | No  | No  | Yes | No  | No | No  | No  |
| 56818  | JMJD1A    | jumonji domain containing 1A                                                            | 4.15E-14 | No  | No  | Yes | No  | No | Yes | No  |
| 10128  | LRPPRC    | leucine-rich PPR-motif containing                                                       | 4.36E-14 | Yes | Yes | Yes | No  | No | Yes | No  |
| 55573  | CDV3      | CDV3 homolog (mouse)                                                                    | 4.40E-14 | No  | No  | No  | Yes | No | No  | No  |
| 10972  | TMED10    | transmembrane emp24-like trafficking protein 10 (yeast)                                 | 4.41E-14 | Yes | No  | No  | Yes | No | Yes | Yes |
| 26271  | FBXO5     | F-box protein 5                                                                         | 4.78E-14 | No  | No  | No  | Yes | No | Yes | No  |
| 83417  | FCRL4     | Fc receptor-like 4                                                                      | 4.88E-14 | Yes | No  | No  | Yes | No | Yes | No  |
| 10269  | ZMPSTE24  | zinc metalloproteinase (STE24 homolog, S. cerevisiae)                                   | 5.03E-14 | No  | No  | No  | Yes | No | No  | No  |
| 4001   | LMNB1     | lamin B1                                                                                | 5.12E-14 | No  | No  | Yes | No  | No | Yes | No  |
| 8360   | HIST1H4D  | histone cluster 1, H4d                                                                  | 5.53E-14 | No  | Yes | No  | Yes | No | No  | No  |
| 8349   | HIST2H2BE | histone cluster 2, H2be                                                                 | 6.01E-14 | No  | No  | Yes | No  | No | Yes | No  |
| 11066  | U1SNRNPBP | U11/U12 snRNP 35K                                                                       | 6.42E-14 | No  | No  | Yes | No  | No | Yes | No  |
| 1235   | CCR6      | chemokine (C-C motif) receptor 6                                                        | 7.72E-14 | Yes | No  | No  | Yes | No | Yes | Yes |
| 51643  | TMBIM4    | transmembrane BAX inhibitor motif containing 4                                          | 7.76E-14 | Yes | No  | Yes | No  | No | No  | No  |
| 31772  | HIST2H2AB | histone cluster 2, H2ab                                                                 | 7.79E-14 | NA  | No  | Yes | No  | No | Yes | No  |
| 116236 | LOC116236 | hypothetical protein LOC116236                                                          | 8.44E-14 | Yes | No  | No  | Yes | No | Yes | No  |

|        |           |                                                                           |          |     |     |     |     |     |     |     |
|--------|-----------|---------------------------------------------------------------------------|----------|-----|-----|-----|-----|-----|-----|-----|
| 1655   | DDX5      | DEAD (Asp-Glu-Ala-Asp) box polypeptide 5                                  | 8.82E-14 | No  | No  | Yes | No  | No  | No  | No  |
| 10769  | PLK2      | polo-like kinase 2 (Drosophila)                                           | 9.04E-14 | No  | No  | Yes | No  | No  | No  | No  |
| 4154   | MBNL1     | muscleblind-like (Drosophila)                                             | 1.01E-13 | Yes | No  | No  | Yes | No  | No  | No  |
| 2033   | EP300     | E1A binding protein p300                                                  | 1.02E-13 | No  | No  | Yes | No  | No  | No  | No  |
| 2123   | EV12A     | ecotropic viral integration site 2A                                       | 1.07E-13 | Yes | No  | Yes | No  | No  | No  | No  |
| 2131   | EXT1      | exostosins (multiple) 1                                                   | 1.11E-13 | No  | Yes | Yes | No  | No  | No  | No  |
| 8348   | HIST1H2BO | histone cluster 1, H2bo                                                   | 1.16E-13 | Yes | No  | No  | Yes | No  | Yes | No  |
| 201456 | FBXO15    | F-box protein 15                                                          | 1.23E-13 | No  | No  | Yes | No  | No  | No  | No  |
| 8332   | HIST1H2AL | histone cluster 1, H2al                                                   | 1.36E-13 | NA  | No  | Yes | No  | No  | No  | No  |
| 9595   | PSCDBP    | pleckstrin homology, Sec7 and coiled-coil domains, binding protein        | 1.36E-13 | No  | No  | Yes | No  | No  | Yes | No  |
| 1628   | DBP       | D site of albumin promoter (albumin D-box) binding protein                | 1.42E-13 | Yes | No  | No  | Yes | No  | Yes | Yes |
| 23019  | CNOT1     | CCR4-NOT transcription complex, subunit 1                                 | 1.48E-13 | No  | No  | Yes | No  | No  | Yes | No  |
| 283349 | RASSF3    | Ras association (RalGDS/AF-6) domain family member 3                      | 1.60E-13 | NA  | No  | Yes | No  | No  | No  | No  |
| 23534  | TNPO3     | transportin 3                                                             | 1.61E-13 | No  | No  | Yes | No  | No  | Yes | Yes |
| 5927   | JARID1A   | jumonji, AT rich interactive domain 1A                                    | 1.65E-13 | No  | No  | No  | Yes | No  | Yes | Yes |
| 1802   | DPH2      | DPH2 homolog (S. cerevisiae)                                              | 1.71E-13 | No  | No  | Yes | No  | No  | Yes | Yes |
| 8344   | HIST1H2BE | histone cluster 1, H2be                                                   | 1.71E-13 | Yes | No  | Yes | No  | No  | Yes | No  |
| 7405   | UVRAG     | UV radiation resistance associated gene                                   | 1.76E-13 | No  | No  | Yes | No  | No  | No  | No  |
| 23418  | CRB1      | crumbs homolog 1 (Drosophila)                                             | 1.77E-13 | No  | No  | Yes | No  | No  | No  | No  |
| 9114   | ATP6V0D1  | ATPase, H+ transporting, lysosomal 38kDa, V0 subunit d1                   | 1.82E-13 | No  | No  | No  | Yes | No  | No  | No  |
| 79031  | PDCL3     | phosducin-like 3                                                          | 1.93E-13 | No  | No  | No  | Yes | No  | No  | No  |
| 972    | CD74      | CD74 molecule, major histocompatibility complex, class II invariant chain | 1.93E-13 | No  | No  | Yes | No  | No  | No  | No  |
| 8335   | HIST1H2AB | histone cluster 1, H2ab                                                   | 1.94E-13 | NA  | No  | Yes | No  | No  | Yes | No  |
| 51117  | COQ4      | coenzyme Q4 homolog (S. cerevisiae)                                       | 1.94E-13 | No  | No  | Yes | No  | No  | Yes | No  |
| 7805   | LAPTM5    | lysosomal associated multispinning membrane protein 5                     | 1.98E-13 | No  | No  | Yes | No  | No  | No  | No  |
| 10778  | ZNF271    | zinc finger protein 271                                                   | 2.04E-13 | No  | No  | No  | Yes | No  | Yes | No  |
| 9584   | RBM39     | RNA binding motif protein 39                                              | 2.09E-13 | No  | No  | Yes | No  | No  | Yes | No  |
| 26057  | ANKRD17   | ankyrin repeat domain 17                                                  | 2.10E-13 | No  | No  | No  | No  | Yes | No  | No  |
| 9776   | HARBI1    | harbinger transposase derived 1                                           | 2.14E-13 | No  | No  | Yes | No  | No  | Yes | Yes |
| 55589  | BMP2K     | BMP2 inducible kinase                                                     | 2.14E-13 | No  | No  | Yes | No  | No  | No  | No  |
| 340146 | SLC35D3   | solute carrier family 35, member D3                                       | 2.15E-13 | No  | No  | Yes | No  | No  | No  | No  |
| 10766  | TOB2      | transducer of ERBB2, 2                                                    | 2.19E-13 | No  | No  | Yes | No  | No  | No  | No  |
| 79694  | MANEA     | mannosidase, endo-alpha                                                   | 2.19E-13 | No  | No  | Yes | No  | No  | No  | No  |
| 51340  | CRNKL1    | crooked neck pre-mRNA splicing factor-like 1 (Drosophila)                 | 2.24E-13 | No  | No  | Yes | No  | No  | No  | No  |

|        |           |                                                                                          |          |     |     |     |     |     |     |     |
|--------|-----------|------------------------------------------------------------------------------------------|----------|-----|-----|-----|-----|-----|-----|-----|
| 3017   | HIST1H2BD | histone cluster 1, H2bd                                                                  | 2.24E-13 | Yes | No  | Yes | No  | No  | Yes | No  |
| 9900   | USP3      | ubiquitin specific peptidase 3                                                           | 2.35E-13 | Yes | Yes | Yes | No  | No  | Yes | No  |
| 9882   | TBC1D4    | TBC1 domain family, member 4                                                             | 2.35E-13 | No  | No  | Yes | No  | No  | No  | No  |
| 11100  | HNRNPUL1  | heterogeneous nuclear ribonucleoprotein U-like 1                                         | 2.39E-13 | No  | No  | Yes | No  | No  | Yes | No  |
| 79718  | TBL1XR1   | transducin (beta)-like 1 X-linked receptor 1                                             | 2.40E-13 | No  | No  | Yes | No  | No  | Yes | No  |
| 2744   | GLS       | glutaminase                                                                              | 2.51E-13 | Yes | No  | Yes | No  | No  | No  | No  |
| 23325  | KIAA1033  | KIAA1033                                                                                 | 2.56E-13 | No  | No  | Yes | No  | No  | No  | No  |
| 56884  | FSTL5     | folliculin-like 5                                                                        | 2.61E-13 | No  | No  | Yes | No  | No  | No  | No  |
| 1960   | EGR3      | early growth response 3                                                                  | 2.62E-13 | Yes | No  | No  | Yes | No  | Yes | Yes |
| 4066   | LYL1      | lymphoblastic leukemia derived sequence 1                                                | 2.77E-13 | Yes | No  | No  | Yes | No  | Yes | Yes |
| 6152   | RPL24     | ribosomal protein L24                                                                    | 2.77E-13 | No  | No  | Yes | No  | No  | Yes | No  |
| 9450   | LY86      | lymphocyte antigen 86                                                                    | 2.78E-13 | Yes | No  | Yes | No  | No  | Yes | Yes |
| 57826  | RAP2C     | RAP2C, member of RAS oncogene family                                                     | 2.82E-13 | No  | No  | Yes | No  | No  | No  | No  |
| 2841   | GPR18     | G protein-coupled receptor 18                                                            | 2.86E-13 | No  | No  | Yes | No  | No  | No  | No  |
| 84944  | MAEL      | maelstrom homolog (Drosophila)                                                           | 2.87E-13 | No  | No  | Yes | No  | No  | No  | No  |
| 11337  | GABARAP   | GABA(A) receptor-associated protein                                                      | 3.02E-13 | No  | No  | Yes | No  | No  | Yes | No  |
| 6402   | SELL      | selectin L (lymphocyte adhesion molecule 1)                                              | 3.03E-13 | Yes | No  | No  | Yes | No  | No  | No  |
| 10963  | STIP1     | stress-induced-phosphoprotein 1 (Hsp70/Hsp90-organizing protein)                         | 3.88E-13 | No  | No  | Yes | No  | No  | No  | No  |
| 3669   | ISG20     | interferon stimulated exonuclease gene 20kDa                                             | 3.89E-13 | No  | No  | No  | Yes | No  | No  | No  |
| 55626  | AMBRA1    | autophagy/beclin-1 regulator 1                                                           | 4.04E-13 | Yes | No  | No  | Yes | No  | Yes | No  |
| 5996   | RGS1      | regulator of G-protein signaling 1                                                       | 4.31E-13 | Yes | No  | Yes | No  | No  | Yes | No  |
| 1859   | DYRK1A    | dual-specificity tyrosine-(Y)-phosphorylation regulated kinase 1A                        | 4.36E-13 | No  | No  | Yes | No  | No  | No  | No  |
| 65258  | MPPE1     | metallophosphoesterase 1                                                                 | 4.38E-13 | No  | No  | Yes | No  | No  | No  | No  |
| 23594  | ORC6L     | origin recognition complex, subunit 6 like (yeast)                                       | 4.39E-13 | No  | No  | Yes | No  | No  | Yes | No  |
| 80854  | SETD7     | SET domain containing (lysine methyltransferase) 7                                       | 4.40E-13 | No  | No  | No  | No  | Yes | Yes | No  |
| 126119 | JOSD2     | Josephin domain containing 2                                                             | 4.60E-13 | No  | No  | No  | Yes | No  | Yes | No  |
| 140691 | TRIM69    | tripartite motif-containing 69                                                           | 4.63E-13 | Yes | No  | Yes | No  | No  | No  | No  |
| 9214   | FAIM3     | Fas apoptotic inhibitory molecule 3                                                      | 4.64E-13 | Yes | No  | No  | Yes | No  | Yes | Yes |
| 2650   | GCNT1     | glucosaminyl (N-acetyl) transferase 1, core 2 (beta-1,6-N-acetylglucosaminyltransferase) | 4.67E-13 | No  | No  | Yes | No  | No  | Yes | No  |
| 11065  | UBE2C     | ubiquitin-conjugating enzyme E2C                                                         | 4.83E-13 | No  | No  | Yes | No  | No  | No  | No  |
| 56926  | NCLN      | nicalin homolog (zebrafish)                                                              | 4.99E-13 | Yes | No  | No  | Yes | No  | Yes | Yes |
| 894    | CCND2     | cyclin D2                                                                                | 5.20E-13 | Yes | Yes | No  | Yes | No  | Yes | Yes |
| 3459   | IFNGR1    | interferon gamma receptor 1                                                              | 5.41E-13 | Yes | No  | Yes | No  | No  | No  | No  |
| 6434   | SFRS10    | splicing factor, arginine/serine-rich 10 (transformer 2 homolog, Drosophila)             | 5.80E-13 | No  | No  | Yes | No  | No  | Yes | No  |

|        |         |                                                                     |          |     |     |     |     |     |     |    |
|--------|---------|---------------------------------------------------------------------|----------|-----|-----|-----|-----|-----|-----|----|
| 23412  | COMMD3  | COMM domain containing 3                                            | 5.81E-13 | No  | No  | No  | No  | Yes | No  | No |
| 2017   | CTTN    | cortactin                                                           | 5.84E-13 | No  | No  | No  | Yes | No  | No  | No |
| 10627  | MRCL3   | myosin regulatory light chain MRCL3                                 | 5.88E-13 | Yes | No  | Yes | No  | No  | Yes | No |
| 9086   | EIF1AY  | eukaryotic translation initiation factor 1A, Y-linked               | 6.19E-13 | No  | No  | Yes | No  | No  | Yes | No |
| 57082  | CASC5   | cancer susceptibility candidate 5                                   | 6.32E-13 | No  | No  | Yes | No  | No  | No  | No |
| 84992  | PIGY    | phosphatidylinositol glycan anchor biosynthesis, class Y            | 6.36E-13 | Yes | No  | No  | Yes | No  | No  | No |
| 91949  | COG7    | component of oligomeric golgi complex 7                             | 6.55E-13 | Yes | No  | No  | Yes | No  | No  | No |
| 80308  | FLAD1   | FAD1 flavin adenine dinucleotide synthetase homolog (S. cerevisiae) | 6.56E-13 | Yes | No  | No  | Yes | No  | No  | No |
| 28227  | PPP2R3B | protein phosphatase 2 (formerly 2A), regulatory subunit B', beta    | 6.64E-13 | No  | No  | No  | No  | No  | No  | No |
| 1314   | COPA    | coatamer protein complex, subunit alpha                             | 6.84E-13 | No  | No  | Yes | No  | No  | No  | No |
| 4194   | MDM4    | Mdm4 p53 binding protein homolog (mouse)                            | 7.13E-13 | No  | No  | Yes | No  | No  | No  | No |
| 6478   | SIAH2   | seven in absentia homolog 2 (Drosophila)                            | 7.15E-13 | No  | No  | No  | Yes | No  | Yes | No |
| 3209   | HOXA13  | homeobox A13                                                        | 7.27E-13 | Yes | No  | Yes | No  | No  | Yes | No |
| 355    | FAS     | Fas (TNF receptor superfamily, member 6)                            | 7.29E-13 | No  | No  | Yes | No  | No  | No  | No |
| 120425 | AMICA1  | adhesion molecule, interacts with CXADR antigen 1                   | 7.30E-13 | No  | No  | No  | Yes | No  | No  | No |
| 131831 | C3orf44 | chromosome 3 open reading frame 44                                  | 7.65E-13 | No  | No  | No  | No  | Yes | No  | No |
| 58528  | RRAGD   | Ras-related GTP binding D                                           | 7.67E-13 | Yes | No  | Yes | No  | No  | No  | No |
| 214    | ALCAM   | activated leukocyte cell adhesion molecule                          | 7.85E-13 | No  | No  | Yes | No  | No  | No  | No |
| 8318   | CDC45L  | CDC45 cell division cycle 45-like (S. cerevisiae)                   | 8.42E-13 | No  | No  | Yes | No  | No  | Yes | No |
| 7353   | UFD1L   | ubiquitin fusion degradation 1 like (yeast)                         | 8.42E-13 | No  | No  | Yes | No  | No  | Yes | No |
| 9552   | SPAG7   | sperm associated antigen 7                                          | 9.24E-13 | No  | No  | No  | Yes | No  | No  | No |
| 84295  | PHF6    | PHD finger protein 6                                                | 9.42E-13 | No  | No  | Yes | No  | No  | No  | No |
| 5294   | PIK3CG  | phosphoinositide-3-kinase, catalytic, gamma polypeptide             | 1.02E-12 | No  | Yes | Yes | No  | No  | Yes | No |
| 6427   | SFRS2   | splicing factor, arginine/serine-rich 2                             | 1.06E-12 | No  | Yes | Yes | No  | No  | No  | No |
| 79157  | MFSD11  | major facilitator superfamily domain containing 11                  | 1.06E-12 | No  | No  | No  | No  | Yes | No  | No |
| 6749   | SSRP1   | structure specific recognition protein 1                            | 1.08E-12 | No  | No  | Yes | No  | No  | No  | No |
| 5024   | P2RX3   | purinergic receptor P2X, ligand-gated ion channel, 3                | 1.08E-12 | No  | No  | Yes | No  | No  | No  | No |
| 283578 | TMED8   | transmembrane emp24 protein transport domain containing 8           | 1.09E-12 | No  | No  | Yes | No  | No  | No  | No |
| 55023  | PHIP    | pleckstrin homology domain interacting protein                      | 1.09E-12 | No  | No  | No  | Yes | No  | No  | No |
| 1385   | CREB1   | cAMP responsive element binding protein 1                           | 1.11E-12 | No  | No  | No  | No  | Yes | No  | No |
| 8676   | STX11   | syntaxin 11                                                         | 1.19E-12 | No  | No  | No  | Yes | No  | No  | No |
| 83752  | LONP2   | lon peptidase 2, peroxisomal                                        | 1.23E-12 | Yes | Yes | Yes | No  | No  | Yes | No |
| 79165  | LENG1   | leukocyte receptor cluster (LRC) member 1                           | 1.23E-12 | No  | No  | No  | Yes | No  | Yes | No |
| 83879  | CDCA7   | cell division cycle associated 7                                    | 1.23E-12 | No  | Yes | Yes | No  | No  | Yes | No |

|        |           |                                                                                                |          |     |     |     |     |     |     |     |
|--------|-----------|------------------------------------------------------------------------------------------------|----------|-----|-----|-----|-----|-----|-----|-----|
| 3151   | HMG2      | high-mobility group nucleosomal binding domain 2                                               | 1.23E-12 | No  | No  | No  | Yes | No  | Yes | Yes |
| 607    | BCL9      | B-cell CLL/lymphoma 9                                                                          | 1.24E-12 | No  | No  | Yes | No  | No  | No  | No  |
| 23155  | CLCC1     | chloride channel CLIC-like 1                                                                   | 1.26E-12 | No  | No  | Yes | No  | No  | No  | No  |
| 90799  | CCDC45    | coiled-coil domain containing 45                                                               | 1.27E-12 | No  | No  | Yes | No  | No  | Yes | No  |
| 23231  | KIAA0746  | KIAA0746 protein                                                                               | 1.29E-12 | No  | Yes | Yes | No  | No  | No  | No  |
| 55846  | ITFG2     | integrin alpha FG-GAP repeat containing 2                                                      | 1.36E-12 | Yes | No  | Yes | No  | No  | No  | No  |
| 10681  | GNB5      | guanine nucleotide binding protein (G protein), beta 5                                         | 1.45E-12 | Yes | No  | Yes | No  | No  | No  | No  |
| 81873  | ARPC5L    | actin related protein 2/3 complex, subunit 5-like                                              | 1.50E-12 | No  | No  | Yes | No  | No  | Yes | No  |
| 5880   | RAC2      | ras-related C3 botulinum toxin substrate 2 (rho family, small GTP binding protein Rac2)        | 1.54E-12 | No  | No  | No  | Yes | No  | Yes | Yes |
| 10983  | CCNI      | cyclin 1                                                                                       | 1.55E-12 | No  | No  | No  | Yes | No  | Yes | No  |
| 3953   | LEPR      | leptin receptor                                                                                | 1.57E-12 | No  | No  | Yes | No  | No  | No  | No  |
| 283209 | PGM2L1    | phosphoglucomutase 2-like 1                                                                    | 1.60E-12 | Yes | Yes | Yes | No  | No  | Yes | No  |
| 9709   | HERPUD1   | homocysteine-inducible, endoplasmic reticulum stress-inducible, ubiquitin-like domain member 1 | 1.67E-12 | No  | No  | Yes | No  | No  | No  | No  |
| 9322   | TRIP10    | thyroid hormone receptor interactor 10                                                         | 1.73E-12 | No  | No  | Yes | No  | No  | No  | No  |
| 79670  | ZCCHC6    | zinc finger, CCHC domain containing 6                                                          | 1.79E-12 | No  | No  | No  | No  | Yes | No  | No  |
| 55033  | FKBP14    | FK506 binding protein 14, 22 kDa                                                               | 1.89E-12 | No  | No  | Yes | No  | No  | Yes | No  |
| 84725  | PLEKHA8   | pleckstrin homology domain containing, family A (phosphoinositide binding specific) member 8   | 1.89E-12 | No  | No  | Yes | No  | No  | Yes | No  |
| 10787  | NCKAP1    | NCK-associated protein 1                                                                       | 1.91E-12 | No  | No  | Yes | No  | No  | No  | No  |
| 2483   | FRG1      | FSHD region gene 1                                                                             | 1.97E-12 | No  | No  | No  | Yes | No  | No  | No  |
| 51606  | ATP6V1H   | ATPase, H <sup>+</sup> transporting, lysosomal 50/57kDa, V1 subunit H                          | 2.03E-12 | Yes | No  | Yes | No  | No  | No  | No  |
| 8969   | HIST1H2AG | histone cluster 1, H2ag                                                                        | 2.08E-12 | No  | No  | Yes | No  | No  | Yes | No  |
| 26167  | PCDH5     | protocadherin beta 5                                                                           | 2.16E-12 | No  | No  | Yes | No  | No  | No  | No  |
| 79801  | SHCBP1    | SHC SH2-domain binding protein 1                                                               | 2.18E-12 | No  | No  | Yes | No  | No  | No  | No  |
| 91319  | DERL3     | Der1-like domain family, member 3                                                              | 2.30E-12 | Yes | No  | No  | Yes | No  | No  | No  |
| 79027  | ZNF655    | zinc finger protein 655                                                                        | 2.34E-12 | No  | No  | Yes | No  | No  | Yes | No  |
| 11080  | DNAJB4    | DnaJ (Hsp40) homolog, subfamily B, member 4                                                    | 2.44E-12 | No  | No  | Yes | No  | No  | No  | No  |
| 9988   | DMTF1     | cyclin D binding myb-like transcription factor 1                                               | 2.49E-12 | No  | No  | Yes | No  | No  | No  | No  |
| 2521   | FUS       | fusion (involved in t(12;16) in malignant liposarcoma)                                         | 2.49E-12 | No  | No  | Yes | No  | No  | No  | No  |
| 9958   | USP15     | ubiquitin specific peptidase 15                                                                | 2.58E-12 | Yes | No  | Yes | No  | No  | No  | No  |
| 4172   | MCM3      | minichromosome maintenance complex component 3                                                 | 2.59E-12 | No  | No  | Yes | No  | No  | Yes | No  |
| 10277  | UBE4B     | ubiquitination factor E4B (UFD2 homolog, yeast)                                                | 2.69E-12 | No  | No  | Yes | No  | No  | No  | No  |
| 1653   | DDX1      | DEAD (Asp-Glu-Ala-Asp) box polypeptide 1                                                       | 2.70E-12 | No  | No  | No  | Yes | No  | No  | No  |
| 123283 | TARSL2    | threonyl-tRNA synthetase-like 2                                                                | 2.71E-12 | Yes | No  | Yes | No  | No  | No  | No  |
| 2342   | FNTB      | farnesyltransferase, CAAX box, beta                                                            | 2.76E-12 | No  | No  | Yes | No  | No  | Yes | No  |

|        |          |                                                               |          |     |     |     |     |     |     |     |
|--------|----------|---------------------------------------------------------------|----------|-----|-----|-----|-----|-----|-----|-----|
| 7071   | KLF10    | Kruppel-like factor 10                                        | 2.78E-12 | No  | No  | No  | Yes | No  | No  | No  |
| 5962   | RDX      | radixin                                                       | 3.09E-12 | Yes | No  | Yes | No  | No  | No  | No  |
| 257144 | GCET2    | germinal center expressed transcript 2                        | 3.15E-12 | No  | Yes | Yes | No  | No  | No  | No  |
| 88455  | ANKRD13A | ankyrin repeat domain 13A                                     | 3.25E-12 | No  | Yes | Yes | No  | No  | Yes | No  |
| 9815   | GIT2     | G protein-coupled receptor kinase interactor 2                | 3.25E-12 | No  | Yes | Yes | No  | No  | No  | No  |
| 1462   | VCAN     | versican                                                      | 3.26E-12 | No  | No  | No  | Yes | No  | No  | No  |
| 10461  | MERTK    | c-mer proto-oncogene tyrosine kinase                          | 3.30E-12 | No  | No  | No  | Yes | No  | No  | No  |
| 56479  | KCNQ5    | potassium voltage-gated channel, KQT-like subfamily, member 5 | 3.32E-12 | No  | No  | Yes | No  | No  | No  | No  |
| 65117  | RSRC2    | arginine/serine-rich coiled-coil 2                            | 3.35E-12 | No  | No  | Yes | No  | No  | Yes | No  |
| 55249  | YY1AP1   | YY1 associated protein 1                                      | 3.44E-12 | No  | Yes | No  | No  | No  | No  | No  |
| 56986  | DTWD1    | DTW domain containing 1                                       | 3.74E-12 | No  | No  | Yes | No  | No  | No  | No  |
| 375748 | C9orf102 | chromosome 9 open reading frame 102                           | 3.94E-12 | NA  | No  | No  | No  | Yes | No  | No  |
| 23600  | AMACR    | alpha-methylacyl-CoA racemase                                 | 3.95E-12 | Yes | No  | Yes | No  | No  | Yes | No  |
| 26534  | OR10G2   | olfactory receptor, family 10, subfamily G, member 2          | 3.95E-12 | NA  | No  | Yes | No  | No  | No  | No  |
| 9939   | RBM8A    | RNA binding motif protein 8A                                  | 3.96E-12 | Yes | No  | Yes | No  | No  | No  | No  |
| 143879 | KBTBD3   | kelch repeat and BTB (POZ) domain containing 3                | 4.00E-12 | No  | No  | Yes | No  | No  | No  | No  |
| 147923 | ZNF420   | zinc finger protein 420                                       | 4.05E-12 | Yes | No  | No  | No  | Yes | No  | No  |
| 2969   | GTF2I    | general transcription factor II, I                            | 4.05E-12 | No  | No  | No  | Yes | No  | Yes | Yes |
| 10906  | TRAFD1   | TRAF-type zinc finger domain containing 1                     | 4.06E-12 | No  | No  | No  | Yes | No  | No  | No  |
| 7431   | VIM      | vimentin                                                      | 4.10E-12 | Yes | No  | No  | No  | Yes | No  | No  |
| 7157   | TP53     | tumor protein p53                                             | 4.36E-12 | No  | No  | Yes | No  | No  | Yes | No  |
| 4053   | LTBP2    | latent transforming growth factor beta binding protein 2      | 4.36E-12 | No  | No  | No  | Yes | No  | No  | No  |
| 9040   | UBE2M    | ubiquitin-conjugating enzyme E2M (UBC12 homolog, yeast)       | 4.43E-12 | No  | No  | No  | Yes | No  | No  | No  |
| 9215   | LARGE    | like-glycosyltransferase                                      | 4.51E-12 | No  | Yes | No  | Yes | No  | No  | No  |
| 51107  | APH1A    | anterior pharynx defective 1 homolog A (C. elegans)           | 4.59E-12 | No  | No  | Yes | No  | No  | No  | No  |
| 79365  | BHLHB3   | basic helix-loop-helix domain containing, class B, 3          | 4.98E-12 | Yes | No  | Yes | No  | No  | Yes | No  |
| 116379 | IL22RA2  | interleukin 22 receptor, alpha 2                              | 4.99E-12 | No  | No  | Yes | No  | No  | No  | No  |
| 60492  | CCDC90B  | coiled-coil domain containing 90B                             | 5.09E-12 | No  | No  | No  | Yes | No  | No  | No  |
| 23013  | SPEN     | spen homolog, transcriptional regulator (Drosophila)          | 5.12E-12 | Yes | No  | Yes | No  | No  | No  | No  |
| 652965 | SNORA48  | small nucleolar RNA, H/ACA box 48                             | 5.12E-12 | NA  | No  | Yes | No  | No  | No  | No  |
| 10635  | RAD51AP1 | RAD51 associated protein 1                                    | 5.14E-12 | No  | No  | Yes | No  | No  | Yes | No  |
| 1173   | AP2M1    | adaptor-related protein complex 2, mu 1 subunit               | 5.15E-12 | No  | No  | Yes | No  | No  | No  | No  |
| 8220   | DGCR14   | DiGeorge syndrome critical region gene 14                     | 5.15E-12 | No  | No  | Yes | No  | No  | Yes | No  |
| 951    | CD37     | CD37 molecule                                                 | 5.18E-12 | No  | No  | No  | No  | Yes | No  | No  |

|        |          |                                                                                         |          |     |     |     |     |     |     |     |
|--------|----------|-----------------------------------------------------------------------------------------|----------|-----|-----|-----|-----|-----|-----|-----|
| 6667   | SP1      | Sp1 transcription factor                                                                | 5.30E-12 | No  | No  | No  | No  | Yes | Yes | No  |
| 80208  | SPG11    | spastic paraplegia 11 (autosomal recessive)                                             | 5.46E-12 | Yes | No  | Yes | No  | No  | No  | No  |
| 403    | ARL3     | ADP-ribosylation factor-like 3                                                          | 5.62E-12 | No  | No  | Yes | No  | No  | Yes | No  |
| 55755  | CDK5RAP2 | CDK5 regulatory subunit associated protein 2                                            | 5.67E-12 | No  | No  | Yes | No  | No  | No  | No  |
| 56204  | KIAA1370 | KIAA1370                                                                                | 5.70E-12 | No  | No  | Yes | No  | No  | No  | No  |
| 8315   | BRAP     | BRCA1 associated protein                                                                | 5.82E-12 | No  | No  | Yes | No  | No  | No  | No  |
| 9453   | GGPS1    | geranylgeranyl diphosphate synthase 1                                                   | 5.93E-12 | Yes | No  | No  | Yes | No  | No  | No  |
| 6760   | SS18     | synovial sarcoma translocation, chromosome 18                                           | 6.25E-12 | No  | Yes | No  | Yes | No  | No  | No  |
| 135    | ADORA2A  | adenosine A2a receptor                                                                  | 6.38E-12 | No  | No  | No  | Yes | No  | No  | No  |
| 7323   | UBE2D3   | ubiquitin-conjugating enzyme E2D 3 (UBC4/5 homolog, yeast)                              | 6.58E-12 | No  | No  | No  | Yes | No  | No  | No  |
| 1848   | DUSP6    | dual specificity phosphatase 6                                                          | 6.75E-12 | Yes | No  | Yes | No  | No  | No  | No  |
| 3091   | HIF1A    | hypoxia-inducible factor 1, alpha subunit (basic helix-loop-helix transcription factor) | 6.85E-12 | No  | No  | No  | Yes | No  | No  | No  |
| 112398 | EGLN2    | egl nine homolog 2 (C. elegans)                                                         | 6.90E-12 | Yes | No  | Yes | No  | No  | No  | No  |
| 4683   | NBN      | nibrin                                                                                  | 6.92E-12 | No  | No  | No  | Yes | No  | No  | No  |
| 79968  | WDR76    | WD repeat domain 76                                                                     | 7.00E-12 | No  | No  | Yes | No  | No  | No  | No  |
| 54464  | XRN1     | 5'-3' exoribonuclease 1                                                                 | 7.06E-12 | Yes | No  | No  | No  | No  | No  | No  |
| 472    | ATM      | ataxia telangiectasia mutated                                                           | 7.17E-12 | Yes | No  | No  | Yes | No  | Yes | No  |
| 8086   | AAAS     | achalasia, adrenocortical insufficiency, alacrimia (Allgrove, triple-A)                 | 7.25E-12 | No  | No  | No  | Yes | No  | No  | No  |
| 694    | BTG1     | B-cell translocation gene 1, anti-proliferative                                         | 7.44E-12 | Yes | No  | Yes | No  | No  | No  | No  |
| 6801   | STRN     | striatin, calmodulin binding protein                                                    | 7.46E-12 | No  | No  | Yes | No  | No  | Yes | No  |
| 686    | BTD      | biotinidase                                                                             | 7.47E-12 | Yes | No  | Yes | No  | No  | Yes | Yes |
| 1643   | DDB2     | damage-specific DNA binding protein 2, 48kDa                                            | 7.67E-12 | No  | Yes | No  | Yes | No  | Yes | No  |
| 5892   | RAD51L3  | RAD51-like 3 (S. cerevisiae)                                                            | 7.71E-12 | Yes | No  | No  | Yes | No  | No  | No  |
| 217    | ALDH2    | aldehyde dehydrogenase 2 family (mitochondrial)                                         | 7.72E-12 | No  | No  | Yes | No  | No  | No  | No  |
| 3431   | SP110    | SP110 nuclear body protein                                                              | 7.73E-12 | Yes | No  | No  | Yes | No  | No  | No  |
| 5911   | RAP2A    | RAP2A, member of RAS oncogene family                                                    | 7.73E-12 | No  | No  | No  | No  | Yes | No  | No  |
| 80167  | C4orf29  | chromosome 4 open reading frame 29                                                      | 7.74E-12 | No  | No  | Yes | No  | No  | Yes | No  |
| 79073  | TMEM109  | transmembrane protein 109                                                               | 7.97E-12 | Yes | No  | Yes | No  | No  | No  | No  |
| 54664  | TMEM106B | transmembrane protein 106B                                                              | 8.12E-12 | No  | No  | No  | No  | Yes | Yes | No  |
| 10019  | SH2B3    | SH2B adaptor protein 3                                                                  | 8.19E-12 | Yes | No  | No  | Yes | No  | No  | No  |
| 1794   | DOCK2    | dedicator of cytokinesis 2                                                              | 8.24E-12 | No  | No  | Yes | No  | No  | No  | No  |
| 9791   | PTDSS1   | phosphatidylserine synthase 1                                                           | 8.48E-12 | No  | No  | Yes | No  | No  | No  | No  |
| 9404   | LPXN     | leupaxin                                                                                | 8.55E-12 | No  | No  | No  | Yes | No  | No  | No  |
| 5450   | POU2AF1  | POU class 2 associating factor 1                                                        | 8.84E-12 | No  | No  | No  | No  | Yes | No  | No  |

|        |          |                                                         |          |     |    |     |     |    |     |     |
|--------|----------|---------------------------------------------------------|----------|-----|----|-----|-----|----|-----|-----|
| 147323 | STAR6    | STAR-related lipid transfer (START) domain containing 6 | 8.94E-12 | No  | No | Yes | No  | No | No  | No  |
| 5727   | PTCH1    | patched homolog 1 (Drosophila)                          | 8.96E-12 | No  | No | No  | Yes | No | No  | No  |
| 55063  | ZCWPW1   | zinc finger, CW type with PWWP domain 1                 | 8.99E-12 | Yes | No | Yes | No  | No | No  | No  |
| 56257  | MEPCE    | methyolphosphate capping enzyme                         | 8.99E-12 | No  | No | Yes | No  | No | No  | No  |
| 165918 | RNF168   | ring finger protein 168                                 | 9.00E-12 | No  | No | Yes | No  | No | No  | No  |
| 80008  | TMEM156  | transmembrane protein 156                               | 9.09E-12 | No  | No | Yes | No  | No | No  | No  |
| 51506  | UFC1     | ubiquitin-fold modifier conjugating enzyme 1            | 9.46E-12 | No  | No | No  | Yes | No | No  | No  |
| 52     | ACP1     | acid phosphatase 1, soluble                             | 9.52E-12 | No  | No | Yes | No  | No | Yes | Yes |
| 1310   | COL19A1  | collagen, type XIX, alpha 1                             | 9.56E-12 | Yes | No | Yes | No  | No | Yes | Yes |
| 2729   | GCLC     | glutamate-cysteine ligase, catalytic subunit            | 1.01E-11 | Yes | No | Yes | No  | No | No  | No  |
| 9685   | CLINT1   | clathrin interactor 1                                   | 1.01E-11 | No  | No | No  | Yes | No | No  | No  |
| 54891  | FLJ20309 | hypothetical protein FLJ20309                           | 1.02E-11 | No  | No | Yes | No  | No | No  | No  |
| 5079   | PAX5     | paired box 5                                            | 1.03E-11 | No  | No | No  | Yes | No | No  | No  |
| 166824 | RASSF6   | Ras association (RalGDS/AF-6) domain family member 6    | 1.03E-11 | No  | No | Yes | No  | No | No  | No  |
| 25800  | SLC39A6  | solute carrier family 39 (zinc transporter), member 6   | 1.06E-11 | Yes | No | No  | Yes | No | No  | No  |
| 55250  | ELP2     | elongation protein 2 homolog (S. cerevisiae)            | 1.06E-11 | Yes | No | No  | Yes | No | No  | No  |
| 1915   | EEF1A1   | eukaryotic translation elongation factor 1 alpha 1      | 1.08E-11 | No  | No | No  | Yes | No | Yes | No  |
| 80199  | FUZ      | fuzzy homolog (Drosophila)                              | 1.08E-11 | No  | No | Yes | No  | No | Yes | No  |
| 81857  | MED25    | mediator complex subunit 25                             | 1.08E-11 | No  | No | Yes | No  | No | No  | No  |
| 124808 | CDC43    | coiled-coil domain containing 43                        | 1.10E-11 | No  | No | No  | Yes | No | No  | No  |
| 11052  | CPSF6    | cleavage and polyadenylation specific factor 6, 68kDa   | 1.12E-11 | No  | No | Yes | No  | No | No  | No  |
| 25847  | ANAPC13  | anaphase promoting complex subunit 13                   | 1.13E-11 | Yes | No | Yes | No  | No | Yes | No  |
| 79621  | RNASEH2B | ribonuclease H2, subunit B                              | 1.15E-11 | Yes | No | Yes | No  | No | No  | No  |
| 9643   | MORF4L2  | mortality factor 4 like 2                               | 1.15E-11 | Yes | No | Yes | No  | No | No  | No  |
| 10728  | PTGES3   | prostaglandin E synthase 3 (cytosolic)                  | 1.15E-11 | No  | No | No  | Yes | No | Yes | No  |
| 11016  | ATF7     | activating transcription factor 7                       | 1.15E-11 | No  | No | No  | Yes | No | No  | No  |
| 394    | ARGAP5   | Rho GTPase activating protein 5                         | 1.16E-11 | Yes | No | Yes | No  | No | No  | No  |
| 971    | CD72     | CD72 molecule                                           | 1.16E-11 | Yes | No | No  | Yes | No | No  | No  |
| 8973   | CHRNA6   | cholinergic receptor, nicotinic, alpha 6                | 1.16E-11 | No  | No | Yes | No  | No | Yes | No  |
| 1615   | DARS     | aspartyl-tRNA synthetase                                | 1.18E-11 | No  | No | No  | Yes | No | Yes | No  |
| 1081   | CGA      | glycoprotein hormones, alpha polypeptide                | 1.20E-11 | No  | No | Yes | No  | No | No  | No  |
| 5652   | PSMB4    | proteasome (prosome, macropain) subunit, beta type, 4   | 1.20E-11 | No  | No | Yes | No  | No | No  | No  |
| 1906   | EDN1     | endothelin 1                                            | 1.22E-11 | No  | No | Yes | No  | No | No  | No  |
| 1846   | DUSP4    | dual specificity phosphatase 4                          | 1.25E-11 | Yes | No | Yes | No  | No | Yes | Yes |



|        |           |                                                                              |          |     |     |     |     |     |     |     |
|--------|-----------|------------------------------------------------------------------------------|----------|-----|-----|-----|-----|-----|-----|-----|
| 392    | ARHGAP1   | Rho GTPase activating protein 1                                              | 1.30E-11 | Yes | No  | No  | Yes | No  | Yes | Yes |
| 79797  | ZNF408    | zinc finger protein 408                                                      | 1.30E-11 | No  | No  | No  | Yes | No  | Yes | No  |
| 571    | BACH1     | BTB and CNC homology 1, basic leucine zipper transcription factor 1          | 1.33E-11 | Yes | No  | Yes | No  | No  | No  | No  |
| 8347   | HIST1H2BC | histone cluster 1, H2bc                                                      | 1.39E-11 | Yes | No  | Yes | No  | No  | Yes | No  |
| 7252   | TSHB      | thyroid stimulating hormone, beta                                            | 1.40E-11 | No  | No  | Yes | No  | No  | No  | No  |
| 28960  | DCPS      | decapping enzyme, scavenger                                                  | 1.41E-11 | No  | No  | Yes | No  | No  | Yes | No  |
| 23760  | PITPNB    | phosphatidylinositol transfer protein, beta                                  | 1.45E-11 | Yes | No  | No  | Yes | No  | No  | No  |
| 8396   | PIP4K2B   | phosphatidylinositol-5-phosphate 4-kinase, type II, beta                     | 1.48E-11 | No  | No  | No  | Yes | No  | Yes | No  |
| 51400  | PPME1     | protein phosphatase methyltransferase 1                                      | 1.50E-11 | No  | No  | No  | Yes | No  | No  | No  |
| 55008  | HERC6     | hect domain and RLD 6                                                        | 1.50E-11 | Yes | No  | Yes | No  | No  | No  | No  |
| 23332  | CLASP1    | cytoplasmic linker associated protein 1                                      | 1.51E-11 | No  | No  | No  | Yes | No  | Yes | No  |
| 6446   | SGK1      | serum/glucocorticoid regulated kinase 1                                      | 1.61E-11 | No  | Yes | Yes | No  | No  | Yes | No  |
| 84447  | SYVN1     | synovial apoptosis inhibitor 1, synoviolin                                   | 1.67E-11 | No  | Yes | No  | Yes | No  | No  | No  |
| 219333 | USP12     | ubiquitin specific peptidase 12                                              | 1.68E-11 | No  | Yes | Yes | No  | No  | Yes | No  |
| 9559   | VPS26A    | vacuolar protein sorting 26 homolog A (S. pombe)                             | 1.69E-11 | No  | Yes | No  | Yes | No  | No  | No  |
| 85236  | HIST1H2BK | histone cluster 1, H2bk                                                      | 1.71E-11 | Yes | No  | No  | Yes | No  | Yes | Yes |
| 83548  | COG3      | component of oligomeric golgi complex 3                                      | 1.86E-11 | Yes | No  | No  | No  | No  | No  | No  |
| 79142  | PHF23     | PHD finger protein 23                                                        | 1.90E-11 | No  | No  | Yes | No  | No  | No  | No  |
| 55074  | OXR1      | oxidation resistance 1                                                       | 1.91E-11 | Yes | Yes | Yes | No  | No  | No  | No  |
| 950    | SCARB2    | scavenger receptor class B, member 2                                         | 1.99E-11 | Yes | No  | No  | Yes | No  | Yes | Yes |
| 10438  | C1D       | nuclear DNA-binding protein                                                  | 1.99E-11 | No  | No  | Yes | No  | No  | Yes | No  |
| 1604   | CD55      | CD55 molecule, decay accelerating factor for complement (Cromer blood group) | 2.02E-11 | Yes | No  | No  | Yes | No  | Yes | Yes |
| 8363   | HIST1H4J  | histone cluster 1, H4j                                                       | 2.06E-11 | NA* | Yes | Yes | No  | No  | Yes | No  |
| 22908  | SACM1L    | SAC1 suppressor of actin mutations 1-like (yeast)                            | 2.07E-11 | No  | No  | No  | No  | Yes | Yes | No  |
| 2805   | GOT1      | glutamic-oxaloacetic transaminase 1, soluble (aspartate aminotransferase 1)  | 2.12E-11 | No  | No  | Yes | No  | No  | Yes | No  |
| 741    | ZNHIT2    | zinc finger, HIT type 2                                                      | 2.12E-11 | No  | No  | No  | Yes | No  | Yes | No  |
| 10193  | RNF41     | ring finger protein 41                                                       | 2.22E-11 | Yes | No  | Yes | No  | No  | No  | No  |
| 5518   | PPP2R1A   | protein phosphatase 2 (formerly 2A), regulatory subunit A, alpha isoform     | 2.24E-11 | No  |
| 221037 | JMJD1C    | jumonji domain containing 1C                                                 | 2.38E-11 | No  | No  | Yes | No  | No  | Yes | No  |
| 57805  | KIAA1967  | KIAA1967                                                                     | 2.39E-11 | No  | No  | No  | Yes | No  | No  | No  |
| 4697   | NDUF44    | NADH dehydrogenase (ubiquinone) 1 alpha subcomplex, 4, 9kDa                  | 2.41E-11 | No  | No  | Yes | No  | No  | Yes | No  |
| 2762   | GMDS      | GDP-mannose 4,6-dehydratase                                                  | 2.46E-11 | No  | No  | Yes | No  | No  | Yes | No  |
| 5495   | PPM1B     | protein phosphatase 1B (formerly 2C), magnesium-dependent, beta isoform      | 2.47E-11 | Yes | No  | Yes | No  | No  | Yes | No  |
| 330    | BIRC3     | baculoviral IAP repeat-containing 3                                          | 2.53E-11 | No  | Yes | Yes | No  | No  | Yes | No  |

|        |          |                                                                                                                         |          |     |     |     |     |     |     |     |
|--------|----------|-------------------------------------------------------------------------------------------------------------------------|----------|-----|-----|-----|-----|-----|-----|-----|
| 9873   | FCHSD2   | FCH and double SH3 domains 2                                                                                            | 2.54E-11 | Yes | No  | No  | No  | No  | Yes | Yes |
| 51705  | EMCN     | endomucin                                                                                                               | 2.59E-11 | Yes | No  | No  | Yes | No  | No  | No  |
| 9337   | CNOT8    | CCR4-NOT transcription complex, subunit 8                                                                               | 2.59E-11 | No  | No  | Yes | No  | No  | No  | No  |
| 63977  | PRDM15   | PR domain containing 15                                                                                                 | 2.64E-11 | No  | No  | Yes | No  | No  | No  | No  |
| 94241  | TP53INP1 | tumor protein p53 inducible nuclear protein 1                                                                           | 2.73E-11 | No  | No  | No  | No  | Yes | No  | No  |
| 11262  | SP140    | SP140 nuclear body protein                                                                                              | 2.79E-11 | No  | No  | Yes | No  | No  | Yes | Yes |
| 1351   | COX8A    | cytochrome c oxidase subunit 8A (ubiquitous)                                                                            | 2.88E-11 | No  | No  | No  | Yes | No  | Yes | No  |
| 6477   | SIAH1    | seven in absentia homolog 1 (Drosophila)                                                                                | 2.88E-11 | Yes | No  | Yes | No  | No  | Yes | No  |
| 54940  | OCIAD1   | OCIA domain containing 1                                                                                                | 2.92E-11 | No  | No  | Yes | No  | No  | Yes | No  |
| 6925   | TCF4     | transcription factor 4                                                                                                  | 2.93E-11 | Yes | No  | No  | Yes | No  | Yes | No  |
| 7094   | TLN1     | talin 1                                                                                                                 | 3.05E-11 | Yes | No  | No  | Yes | No  | Yes | Yes |
| 1195   | CLK1     | CDC-like kinase 1                                                                                                       | 3.07E-11 | No  | No  | No  | No  | Yes | No  | No  |
| 5050   | PAFAH1B3 | platelet-activating factor acetylhydrolase, isoform Ib, gamma subunit 29kDa                                             | 3.15E-11 | No  | No  | No  | Yes | No  | Yes | No  |
| 7259   | TSPYL1   | TSPY-like 1                                                                                                             | 3.16E-11 | Yes | Yes | Yes | No  | No  | No  | No  |
| 92822  | ZNF276   | zinc finger protein 276                                                                                                 | 3.28E-11 | Yes | No  | Yes | No  | No  | No  | No  |
| 663    | BNIP2    | BCL2/adenovirus E1B 19kDa interacting protein 2                                                                         | 3.43E-11 | No  | No  | Yes | No  | No  | No  | No  |
| 285971 | ZNF775   | zinc finger protein 775                                                                                                 | 3.46E-11 | No  | No  | No  | Yes | No  | Yes | No  |
| 142    | PARP1    | poly (ADP-ribose) polymerase family, member 1                                                                           | 3.46E-11 | No  | No  | Yes | No  | No  | Yes | No  |
| 2632   | GBE1     | glucan (1,4-alpha)-, branching enzyme 1 (glycogen branching enzyme, Andersen disease, glycogen storage disease type IV) | 3.51E-11 | No  | No  | No  | No  | Yes | No  | No  |
| 23234  | DNAJC9   | DnaJ (Hsp40) homolog, subfamily C, member 9                                                                             | 3.57E-11 | No  | No  | Yes | No  | No  | No  | No  |
| 79295  | OR5H6    | olfactory receptor, family 5, subfamily H, member 6                                                                     | 3.58E-11 | NA  | No  | Yes | No  | No  | No  | No  |
| 8930   | MBD4     | methyl-CpG binding domain protein 4                                                                                     | 3.60E-11 | No  | Yes | Yes | No  | No  | No  | No  |
| 64397  | ZFP106   | zinc finger protein 106 homolog (mouse)                                                                                 | 3.74E-11 | No  | No  | No  | No  | No  | Yes | No  |
| 11340  | EXOSC8   | exosome component 8                                                                                                     | 3.90E-11 | No  | No  | Yes | No  | No  | Yes | No  |
| 29880  | ALG5     | asparagine-linked glycosylation 5 homolog (S. cerevisiae, dolichyl-phosphate beta-glucosyltransferase)                  | 3.90E-11 | No  | No  | Yes | No  | No  | Yes | No  |
| 144100 | PLEKHA7  | pleckstrin homology domain containing, family A member 7                                                                | 3.94E-11 | No  |
| 10600  | USP16    | ubiquitin specific peptidase 16                                                                                         | 3.98E-11 | No  | No  | Yes | No  | No  | Yes | No  |
| 10538  | BATF     | basic leucine zipper transcription factor, ATF-like                                                                     | 3.98E-11 | Yes | No  | No  | Yes | No  | No  | No  |
| 360023 | ZBTB41   | zinc finger and BTB domain containing 41                                                                                | 3.99E-11 | Yes | No  | Yes | No  | No  | Yes | No  |
| 5051   | PAFAH2   | platelet-activating factor acetylhydrolase 2, 40kDa                                                                     | 4.07E-11 | No  | No  | No  | Yes | No  | No  | No  |
| 2932   | GSK3B    | glycogen synthase kinase 3 beta                                                                                         | 4.11E-11 | No  | No  | Yes | No  | No  | No  | No  |
| 4208   | MEF2C    | myocyte enhancer factor 2C                                                                                              | 4.23E-11 | Yes | No  | No  | Yes | No  | Yes | No  |
| 4901   | NRL      | neural retina leucine zipper                                                                                            | 4.32E-11 | No  | No  | Yes | No  | No  | No  | No  |
| 7170   | TPM3     | tropomyosin 3                                                                                                           | 4.32E-11 | No  | Yes | No  | Yes | No  | No  | No  |

|        |           |                                                                                             |          |     |     |     |     |    |     |    |
|--------|-----------|---------------------------------------------------------------------------------------------|----------|-----|-----|-----|-----|----|-----|----|
| 801    | CALM1     | calmodulin 1 (phosphorylase kinase, delta)                                                  | 4.34E-11 | No  | No  | No  | Yes | No | No  | No |
| 331    | XIAP      | X-linked inhibitor of apoptosis                                                             | 4.46E-11 | Yes | No  | Yes | No  | No | No  | No |
| 26065  | LSM14A    | LSM14A, SCD6 homolog A (S. cerevisiae)                                                      | 4.69E-11 | No  | Yes | Yes | No  | No | No  | No |
| 197259 | MLKL      | mixed lineage kinase domain-like                                                            | 4.71E-11 | Yes | No  | Yes | No  | No | No  | No |
| 4081   | MAB21L1   | mab-21-like 1 (C. elegans)                                                                  | 4.74E-11 | No  | No  | No  | Yes | No | No  | No |
| 3635   | INPP5D    | inositol polyphosphate-5-phosphatase, 145kDa                                                | 4.75E-11 | Yes | No  | No  | Yes | No | No  | No |
| 4735   | SEPT2     | septin 2                                                                                    | 4.77E-11 | No  | No  | Yes | No  | No | No  | No |
| 1716   | DGUOK     | deoxyguanosine kinase                                                                       | 4.78E-11 | No  | No  | Yes | No  | No | No  | No |
| 25790  | CCDC19    | coiled-coil domain containing 19                                                            | 4.80E-11 | No  | No  | Yes | No  | No | No  | No |
| 5928   | RBBP4     | retinoblastoma binding protein 4                                                            | 4.98E-11 | No  | Yes | No  | Yes | No | Yes | No |
| 339487 | ZBTB80S   | zinc finger and BTB domain containing 8 opposite strand                                     | 4.98E-11 | No  | No  | Yes | No  | No | No  | No |
| 7360   | UGP2      | UDP-glucose pyrophosphorylase 2                                                             | 4.99E-11 | No  | No  | Yes | No  | No | Yes | No |
| 7873   | ARMET     | arginine-rich, mutated in early stage tumors                                                | 4.99E-11 | No  | No  | No  | Yes | No | No  | No |
| 53336  | CPXCR1    | CPX chromosome region, candidate 1                                                          | 5.22E-11 | No  | No  | Yes | No  | No | No  | No |
| 256471 | MFSDB     | major facilitator superfamily domain containing 8                                           | 5.27E-11 | Yes | No  | No  | Yes | No | Yes | No |
| 9110   | MTMR4     | myotubularin related protein 4                                                              | 5.29E-11 | Yes | Yes | No  | No  | No | No  | No |
| 51466  | EVL       | Enah/Vasp-like                                                                              | 5.45E-11 | Yes | No  | Yes | No  | No | No  | No |
| 23636  | NUP62     | nucleoporin 62kDa                                                                           | 5.63E-11 | No  | No  | No  | Yes | No | No  | No |
| 311    | ANXA11    | annexin A11                                                                                 | 5.69E-11 | Yes | No  | Yes | No  | No | No  | No |
| 1438   | CSF2RA    | colony stimulating factor 2 receptor, alpha, low-affinity (granulocyte-macrophage)          | 6.02E-11 | Yes | No  | No  | Yes | No | No  | No |
| 7355   | SLC35A2   | solute carrier family 35 (UDP-galactose transporter), member A2                             | 6.03E-11 | No  | No  | No  | Yes | No | No  | No |
| 124401 | ANKS3     | ankyrin repeat and sterile alpha motif domain containing 3                                  | 6.09E-11 | No  | No  | No  | Yes | No | No  | No |
| 3008   | HIST1H1E  | histone cluster 1, H1e                                                                      | 6.21E-11 | No  | No  | Yes | No  | No | No  | No |
| 7531   | YWHAE     | tyrosine 3-monooxygenase/tryptophan 5-monooxygenase activation protein, epsilon polypeptide | 6.24E-11 | No  | No  | Yes | No  | No | Yes | No |
| 8346   | HIST1H2BI | histone cluster 1, H2bi                                                                     | 6.24E-11 | Yes | No  | Yes | No  | No | Yes | No |
| 8355   | HIST1H3G  | histone cluster 1, H3g                                                                      | 6.24E-11 | No  | No  | Yes | No  | No | Yes | No |
| 7171   | TPM4      | tropomyosin 4                                                                               | 6.24E-11 | No  | No  | Yes | No  | No | No  | No |
| 7095   | SEC62     | SEC62 homolog (S. cerevisiae)                                                               | 6.39E-11 | Yes | No  | Yes | No  | No | No  | No |
| 5476   | CTSA      | cathepsin A                                                                                 | 6.61E-11 | Yes | No  | No  | Yes | No | Yes | No |
| 140825 | NEURL2    | neuronalized homolog 2 (Drosophila)                                                         | 6.61E-11 | No  | No  | No  | Yes | No | Yes | No |
| 57461  | ISY1      | ISY1 splicing factor homolog (S. cerevisiae)                                                | 6.64E-11 | No  | No  | Yes | No  | No | Yes | No |
| 91039  | DPP9      | dipeptidyl-peptidase 9                                                                      | 6.74E-11 | No  | No  | Yes | No  | No | No  | No |
| 6586   | SLIT3     | slit homolog 3 (Drosophila)                                                                 | 6.93E-11 | No  | No  | No  | Yes | No | No  | No |
| 4293   | MAP3K9    | mitogen-activated protein kinase kinase kinase 9                                            | 7.05E-11 | No  | No  | No  | No  | No | No  | No |

|        |          |                                                                                   |          |     |     |     |     |    |     |    |
|--------|----------|-----------------------------------------------------------------------------------|----------|-----|-----|-----|-----|----|-----|----|
| 8556   | CDC14A   | CDC14 cell division cycle 14 homolog A (S. cerevisiae)                            | 7.29E-11 | Yes | No  | No  | Yes | No | Yes | No |
| 23012  | STK38L   | serine/threonine kinase 38 like                                                   | 7.33E-11 | No  | No  | Yes | No  | No | No  | No |
| 1486   | CTBS     | chitinase, di-N-acetyl-                                                           | 7.53E-11 | No  | No  | No  | Yes | No | No  | No |
| 1842   | ECM2     | extracellular matrix protein 2, female organ and adipocyte specific               | 7.61E-11 | No  | No  | Yes | No  | No | No  | No |
| 51263  | MRPL30   | mitochondrial ribosomal protein L30                                               | 7.65E-11 | No  | No  | Yes | No  | No | Yes | No |
| 55783  | FLJ11171 | hypothetical protein FLJ11171                                                     | 7.73E-11 | Yes | No  | No  | Yes | No | No  | No |
| 10208  | USPL1    | ubiquitin specific peptidase like 1                                               | 7.73E-11 | No  | No  | Yes | No  | No | Yes | No |
| 170384 | FUT11    | fucosyltransferase 11 (alpha (1,3) fucosyltransferase)                            | 7.90E-11 | No  | Yes | No  | Yes | No | No  | No |
| 116966 | WDR17    | WD repeat domain 17                                                               | 7.98E-11 | No  | No  | Yes | No  | No | Yes | No |
| 253430 | IPMK     | inositol polyphosphate multikinase                                                | 8.01E-11 | No  | No  | Yes | No  | No | No  | No |
| 10716  | TBR1     | T-box, brain, 1                                                                   | 8.08E-11 | No  | No  | No  | No  | No | No  | No |
| 388552 | BLOC1S3  | biogenesis of lysosome-related organelles complex-1, subunit 3                    | 8.26E-11 | Yes | No  | Yes | No  | No | No  | No |
| 79090  | TRAPPC6A | trafficking protein particle complex 6A                                           | 8.26E-11 | No  | No  | Yes | No  | No | No  | No |
| 7978   | MTERF    | mitochondrial transcription termination factor                                    | 8.48E-11 | No  | No  | Yes | No  | No | No  | No |
| 25816  | TNFAIP8  | tumor necrosis factor, alpha-induced protein 8                                    | 8.64E-11 | No  | No  | No  | Yes | No | No  | No |
| 7702   | ZNF143   | zinc finger protein 143                                                           | 9.01E-11 | No  | No  | Yes | No  | No | No  | No |
| 4790   | NFKB1    | nuclear factor of kappa light polypeptide gene enhancer in B-cells 1 (p105)       | 9.38E-11 | Yes | No  | Yes | No  | No | No  | No |
| 3980   | LIG3     | ligase III, DNA, ATP-dependent                                                    | 9.56E-11 | No  | No  | Yes | No  | No | No  | No |
| 51222  | ZNF219   | zinc finger protein 219                                                           | 9.65E-11 | Yes | No  | No  | Yes | No | No  | No |
| 3930   | LBR      | lamin B receptor                                                                  | 9.86E-11 | No  | No  | Yes | No  | No | Yes | No |
| 55839  | CENPN    | centromere protein N                                                              | 9.89E-11 | No  | No  | Yes | No  | No | Yes | No |
| 27244  | SESN1    | sestrin 1                                                                         | 1.02E-10 | Yes | No  | Yes | No  | No | Yes | No |
| 6634   | SNRPD3   | small nuclear ribonucleoprotein D3 polypeptide 18kDa                              | 1.02E-10 | No  | No  | Yes | No  | No | Yes | No |
| 51601  | LIPT1    | lipoyltransferase 1                                                               | 1.03E-10 | Yes | No  | Yes | No  | No | Yes | No |
| 55024  | BANK1    | B-cell scaffold protein with ankyrin repeats 1                                    | 1.05E-10 | Yes | No  | Yes | No  | No | No  | No |
| 65125  | WNK1     | WNK lysine deficient protein kinase 1                                             | 1.05E-10 | No  | No  | Yes | No  | No | No  | No |
| 10370  | CITED2   | Cbp/p300-interacting transactivator, with Glu/Asp-rich carboxy-terminal domain, 2 | 1.06E-10 | No  | No  | Yes | No  | No | Yes | No |
| 3312   | HSPA8    | heat shock 70kDa protein 8                                                        | 1.07E-10 | No  | No  | Yes | No  | No | No  | No |
| 148254 | ZNF555   | zinc finger protein 555                                                           | 1.07E-10 | No  | No  | Yes | No  | No | No  | No |
| 29123  | ANKRD11  | ankyrin repeat domain 11                                                          | 1.07E-10 | Yes | Yes | Yes | No  | No | No  | No |
| 1737   | DLAT     | dihydrolipoamide S-acetyltransferase                                              | 1.09E-10 | No  | Yes | Yes | No  | No | No  | No |
| 51567  | TTRAP    | TRAF and TNF receptor associated protein                                          | 1.09E-10 | No  | No  | Yes | No  | No | No  | No |
| 149420 | PDIK1L   | PDLIM1 interacting kinase 1 like                                                  | 1.13E-10 | No  | No  | Yes | No  | No | Yes | No |
| 64431  | ACTR6    | ARP6 actin-related protein 6 homolog (yeast)                                      | 1.14E-10 | No  | No  | Yes | No  | No | No  | No |

|        |           |                                                                     |          |     |     |     |     |     |     |     |
|--------|-----------|---------------------------------------------------------------------|----------|-----|-----|-----|-----|-----|-----|-----|
| 585    | BBS4      | Bardet-Biedl syndrome 4                                             | 1.14E-10 | No  | No  | No  | Yes | No  | No  | No  |
| 57559  | STAMBPL1  | STAM binding protein-like 1                                         | 1.17E-10 | Yes | No  | No  | Yes | No  | No  | No  |
| 1974   | EIF4A2    | eukaryotic translation initiation factor 4A, isoform 2              | 1.19E-10 | No  | No  | Yes | No  | No  | No  | No  |
| 84307  | ZNF397    | zinc finger protein 397                                             | 1.19E-10 | Yes | No  | No  | Yes | No  | No  | No  |
| 26268  | FBXO9     | F-box protein 9                                                     | 1.23E-10 | Yes | No  | Yes | No  | No  | No  | No  |
| 22858  | ICK       | intestinal cell (MAK-like) kinase                                   | 1.23E-10 | Yes | No  | Yes | No  | No  | No  | No  |
| 8334   | HIST1H2AC | histone cluster 1, H2ac                                             | 1.32E-10 | Yes | No  | Yes | No  | No  | Yes | Yes |
| 80255  | SLC36F5   | solute carrier family 35, member F5                                 | 1.33E-10 | No  | No  | Yes | No  | No  | No  | No  |
| 8945   | BTRC      | beta-transducin repeat containing                                   | 1.34E-10 | No  | No  | No  | No  | Yes | No  | No  |
| 54107  | POLE3     | polymerase (DNA directed), epsilon 3 (p17 subunit)                  | 1.34E-10 | No  |
| 4123   | MAN2C1    | mannosidase, alpha, class 2C, member 1                              | 1.34E-10 | Yes | No  | No  | Yes | No  | No  | No  |
| 54431  | DNAJC10   | DnaJ (Hsp40) homolog, subfamily C, member 10                        | 1.34E-10 | No  | Yes | Yes | No  | No  | No  | No  |
| 10210  | TOPORS    | topoisomerase I binding, arginine/serine-rich                       | 1.34E-10 | Yes | No  | Yes | No  | No  | No  | No  |
| 11335  | CBX3      | chromobox homolog 3 (HP1 gamma homolog, Drosophila)                 | 1.34E-10 | No  | No  | Yes | No  | No  | Yes | No  |
| 3416   | IDE       | insulin-degrading enzyme                                            | 1.39E-10 | No  | No  | Yes | No  | No  | Yes | No  |
| 57804  | POLD4     | polymerase (DNA-directed), delta 4                                  | 1.42E-10 | No  | No  | No  | Yes | No  | No  | No  |
| 80237  | ELL3      | elongation factor RNA polymerase II-like 3                          | 1.43E-10 | No  | Yes | No  | Yes | No  | Yes | No  |
| 60677  | BRUNOL6   | bruno-like 6, RNA binding protein (Drosophila)                      | 1.43E-10 | No  | No  | Yes | No  | No  | No  | No  |
| 54820  | NDE1      | nude nuclear distribution gene E homolog 1 (A. nidulans)            | 1.45E-10 | No  | No  | No  | Yes | No  | Yes | No  |
| 1487   | CTBP1     | C-terminal binding protein 1                                        | 1.45E-10 | No  |
| 6782   | HSPA13    | heat shock protein 70kDa family, member 13                          | 1.45E-10 | No  | No  | Yes | No  | No  | No  | No  |
| 94239  | H2AFV     | H2A histone family, member V                                        | 1.45E-10 | No  | Yes | Yes | No  | No  | No  | No  |
| 26263  | FBXO22    | F-box protein 22                                                    | 1.45E-10 | No  | No  | Yes | No  | No  | No  | No  |
| 8366   | HIST1H4B  | histone cluster 1, H4b                                              | 1.46E-10 | No  | Yes | Yes | No  | No  | No  | No  |
| 80351  | TNKS2     | tankyrase, TRF1-interacting ankyrin-related ADP-ribose polymerase 2 | 1.46E-10 | No  | No  | Yes | No  | No  | No  | No  |
| 6491   | STIL      | SCL/TAL1 interrupting locus                                         | 1.47E-10 | No  | No  | Yes | No  | No  | No  | No  |
| 9111   | NMI       | N-myc (and STAT) interactor                                         | 1.47E-10 | No  | No  | No  | Yes | No  | No  | No  |
| 10320  | IKZF1     | IKAROS family zinc finger 1 (Ikaros)                                | 1.49E-10 | No  | Yes | Yes | No  | No  | No  | No  |
| 131583 | FAM43A    | family with sequence similarity 43, member A                        | 1.49E-10 | No  | No  | Yes | No  | No  | Yes | No  |
| 116228 | FAM36A    | family with sequence similarity 36, member A                        | 1.52E-10 | Yes | Yes | Yes | No  | No  | No  | No  |
| 26191  | PTPN22    | protein tyrosine phosphatase, non-receptor type 22 (lymphoid)       | 1.58E-10 | No  | No  | Yes | No  | No  | No  | No  |
| 2551   | GABPA     | GA binding protein transcription factor, alpha subunit 60kDa        | 1.59E-10 | No  | No  | No  | No  | Yes | No  | No  |
| 11332  | ACOT7     | acyl-CoA thioesterase 7                                             | 1.60E-10 | No  | No  | Yes | No  | No  | Yes | No  |
| 23097  | CDC2L6    | cell division cycle 2-like 6 (CDKB-like)                            | 1.63E-10 | No  | No  | Yes | No  | No  | Yes | No  |

|        |         |                                                                               |          |     |     |     |     |     |     |     |
|--------|---------|-------------------------------------------------------------------------------|----------|-----|-----|-----|-----|-----|-----|-----|
| 5609   | MAP2K7  | mitogen-activated protein kinase kinase 7                                     | 1.64E-10 | No  | No  | No  | Yes | No  | No  | No  |
| 9819   | TSC22D2 | TSC22 domain family, member 2                                                 | 1.65E-10 | Yes | No  | Yes | No  | No  | No  | No  |
| 10773  | ZBTB6   | zinc finger and BTB domain containing 6                                       | 1.66E-10 | No  | No  | Yes | No  | No  | No  | No  |
| 11051  | NUDT21  | nudix (nucleoside diphosphate linked moiety X)-type motif 21                  | 1.67E-10 | No  | No  | Yes | No  | No  | No  | No  |
| 124790 | HEXIM2  | hexamethylene bis-acetamide inducible 2                                       | 1.67E-10 | Yes | No  | Yes | No  | No  | No  | No  |
| 867    | CBL     | Cas-Br-M (murine) ecotropic retroviral transforming sequence                  | 1.69E-10 | No  | No  | Yes | No  | No  | No  | No  |
| 2617   | GARS    | glycyl-tRNA synthetase                                                        | 1.70E-10 | No  | No  | Yes | No  | No  | Yes | No  |
| 51569  | UFM1    | ubiquitin-fold modifier 1                                                     | 1.70E-10 | Yes | No  | Yes | No  | No  | No  | No  |
| 3015   | H2AFZ   | H2A histone family, member Z                                                  | 1.72E-10 | No  | No  | Yes | No  | No  | No  | No  |
| 10933  | MORF4L1 | mortality factor 4 like 1                                                     | 1.73E-10 | No  | No  | Yes | No  | No  | No  | No  |
| 7398   | USP1    | ubiquitin specific peptidase 1                                                | 1.73E-10 | No  | No  | Yes | No  | No  | No  | No  |
| 55032  | SLC35A5 | solute carrier family 35, member A5                                           | 1.74E-10 | No  | No  | No  | No  | Yes | Yes | No  |
| 92140  | MTDH    | metadherin                                                                    | 1.75E-10 | No  |
| 5629   | PROX1   | prospero homeobox 1                                                           | 1.77E-10 | No  | No  | Yes | No  | No  | Yes | No  |
| 1634   | DCN     | decorin                                                                       | 1.83E-10 | No  | No  | Yes | No  | No  | No  | No  |
| 85464  | SSH2    | slingshot homolog 2 (Drosophila)                                              | 1.84E-10 | Yes | No  | Yes | No  | No  | Yes | No  |
| 56099  | PCDHGB7 | protocadherin gamma subfamily B, 7                                            | 1.88E-10 | No  | No  | Yes | No  | No  | Yes | No  |
| 29946  | SERTAD3 | SERTA domain containing 3                                                     | 1.88E-10 | Yes | No  | Yes | No  | No  | Yes | No  |
| 51514  | DTL     | denticleless homolog (Drosophila)                                             | 1.91E-10 | No  | No  | Yes | No  | No  | Yes | No  |
| 27127  | SMC1B   | structural maintenance of chromosomes 1B                                      | 1.92E-10 | No  | No  | Yes | No  | No  | Yes | No  |
| 57026  | PDXP    | pyridoxal (pyridoxine, vitamin B6) phosphatase                                | 1.93E-10 | No  | No  | Yes | No  | No  | No  | No  |
| 6046   | BRD2    | bromodomain containing 2                                                      | 1.93E-10 | No  | No  | No  | Yes | No  | Yes | Yes |
| 58487  | CREBZF  | CREB/ATF bZIP transcription factor                                            | 1.94E-10 | No  | No  | No  | Yes | No  | Yes | No  |
| 861    | RUNX1   | runt-related transcription factor 1 (acute myeloid leukemia 1; aml1 oncogene) | 1.94E-10 | No  | No  | Yes | No  | No  | No  | No  |
| 4729   | NDUFV2  | NADH dehydrogenase (ubiquinone) flavoprotein 2, 24kDa                         | 1.98E-10 | No  | No  | Yes | No  | No  | No  | No  |
| 26973  | CHORDC1 | cysteine and histidine-rich domain (CHORD)-containing 1                       | 2.03E-10 | Yes | No  | Yes | No  | No  | Yes | No  |
| 94240  | EPST11  | epithelial stromal interaction 1 (breast)                                     | 2.06E-10 | Yes | Yes | Yes | No  | No  | No  | No  |
| 8470   | SORBS2  | sorbin and SH3 domain containing 2                                            | 2.09E-10 | Yes | No  | Yes | No  | No  | No  | No  |
| 201163 | FLCN    | folliculin                                                                    | 2.09E-10 | Yes | No  | Yes | No  | No  | No  | No  |
| 80851  | SH3BP5L | SH3-binding domain protein 5-like                                             | 2.11E-10 | No  | No  | No  | Yes | No  | No  | No  |
| 5930   | RBBP6   | retinoblastoma binding protein 6                                              | 2.11E-10 | Yes | No  | No  | No  | No  | No  | No  |
| 55422  | ZNF331  | zinc finger protein 331                                                       | 2.20E-10 | Yes | No  | No  | Yes | No  | No  | No  |
| 9126   | SMC3    | structural maintenance of chromosomes 3                                       | 2.24E-10 | No  | Yes | Yes | No  | No  | No  | No  |
| 54832  | VPS13C  | vacuolar protein sorting 13 homolog C (S. cerevisiae)                         | 2.25E-10 | Yes | No  | Yes | No  | No  | No  | No  |

|        |           |                                                                             |          |     |     |     |     |     |     |     |
|--------|-----------|-----------------------------------------------------------------------------|----------|-----|-----|-----|-----|-----|-----|-----|
| 145741 | FAM148A   | family with sequence similarity 148, member A                               | 2.25E-10 | NA  | No  | Yes | No  | No  | No  | No  |
| 84954  | MPND      | MPN domain containing                                                       | 2.30E-10 | No  | No  | No  | Yes | No  | Yes | No  |
| 55620  | STAP2     | signal transducing adaptor family member 2                                  | 2.30E-10 | No  | No  | No  | Yes | No  | No  | No  |
| 8666   | EIF3G     | eukaryotic translation initiation factor 3, subunit G                       | 2.34E-10 | No  | No  | No  | Yes | No  | No  | No  |
| 25824  | PRDX5     | peroxiredoxin 5                                                             | 2.39E-10 | No  | No  | No  | Yes | No  | Yes | No  |
| 51504  | HSPC152   | hypothetical protein HSPC152                                                | 2.39E-10 | No  | No  | No  | Yes | No  | Yes | No  |
| 81542  | TXNDC1    | thioredoxin domain containing 1                                             | 2.40E-10 | No  | No  | Yes | No  | No  | Yes | No  |
| 387640 | C10orf140 | chromosome 10 open reading frame 140                                        | 2.48E-10 | No  | No  | Yes | No  | No  | Yes | No  |
| 79176  | FBXL15    | F-box and leucine-rich repeat protein 15                                    | 2.48E-10 | No  | No  | Yes | No  | No  | No  | No  |
| 4616   | GADD45B   | growth arrest and DNA-damage-inducible, beta                                | 2.54E-10 | No  | No  | No  | Yes | No  | Yes | No  |
| 10730  | YME1L1    | YME1-like 1 ( <i>S. cerevisiae</i> )                                        | 2.62E-10 | No  | No  | Yes | No  | No  | No  | No  |
| 27086  | FOXP1     | forkhead box P1                                                             | 2.62E-10 | Yes | No  | Yes | No  | No  | No  | No  |
| 9256   | BZRAP1    | benzodiazepine receptor (peripheral) associated protein 1                   | 2.62E-10 | No  | Yes | No  | No  | No  | Yes | No  |
| 55872  | PBK       | PDZ binding kinase                                                          | 2.68E-10 | No  | No  | Yes | No  | No  | No  | No  |
| 79781  | IQCA      | IQ motif containing with AAA domain                                         | 2.69E-10 | No  | No  | Yes | No  | No  | No  | No  |
| 9682   | JMJ2A     | jumonji domain containing 2A                                                | 2.69E-10 | No  | No  | Yes | No  | No  | No  | No  |
| 6924   | TCEB3     | transcription elongation factor B (SIII), polypeptide 3 (110kDa, elongin A) | 2.69E-10 | Yes | No  | No  | Yes | No  | No  | No  |
| 57332  | CBX8      | chromobox homolog 8 ( <i>Pc</i> class homolog, <i>Drosophila</i> )          | 2.69E-10 | No  | No  | No  | Yes | No  | No  | No  |
| 149986 | LSM14B    | LSM14B, SCD6 homolog B ( <i>S. cerevisiae</i> )                             | 2.69E-10 | Yes | No  | Yes | No  | No  | No  | No  |
| 3070   | HELLS     | helicase, lymphoid-specific                                                 | 2.69E-10 | No  | No  | Yes | No  | No  | No  | No  |
| 3927   | LASP1     | LIM and SH3 protein 1                                                       | 2.70E-10 | No  | No  | No  | No  | Yes | Yes | No  |
| 22883  | CLSTN1    | calyntenin 1                                                                | 2.70E-10 | No  | No  | No  | Yes | No  | Yes | No  |
| 55863  | TMEM126B  | transmembrane protein 126B                                                  | 2.70E-10 | No  | No  | No  | Yes | No  | No  | No  |
| 25963  | TMEM87A   | transmembrane protein 87A                                                   | 2.75E-10 | Yes | No  | Yes | No  | No  | Yes | Yes |
| 3577   | IL8RA     | interleukin 8 receptor, alpha                                               | 3.02E-10 | No  | No  | No  | Yes | No  | No  | No  |
| 7555   | CNBP      | CCHC-type zinc finger, nucleic acid binding protein                         | 3.03E-10 | Yes | No  | No  | Yes | No  | No  | No  |
| 126074 | C19orf39  | chromosome 19 open reading frame 39                                         | 3.08E-10 | No  | No  | Yes | No  | No  | Yes | No  |
| 7745   | ZNF192    | zinc finger protein 192                                                     | 3.13E-10 | No  | No  | No  | Yes | No  | Yes | No  |
| 57455  | REXO1     | REX1, RNA exonuclease 1 homolog ( <i>S. cerevisiae</i> )                    | 3.16E-10 | Yes | No  | Yes | No  | No  | No  | No  |
| 9188   | DDX21     | DEAD (Asp-Glu-Ala-Asp) box polypeptide 21                                   | 3.19E-10 | No  | No  | No  | No  | Yes | No  | No  |
| 81550  | TDRD3     | tudor domain containing 3                                                   | 3.23E-10 | No  | No  | Yes | No  | No  | Yes | Yes |
| 9899   | SV2B      | synaptic vesicle glycoprotein 2B                                            | 3.26E-10 | Yes | No  | Yes | No  | No  | No  | No  |
| 51460  | SFMBT1    | Scm-like with four mbt domains 1                                            | 3.26E-10 | No  | No  | Yes | No  | No  | No  | No  |
| 4609   | MYC       | v-myc myelocytomatosis viral oncogene homolog (avian)                       | 3.26E-10 | Yes | No  | Yes | No  | No  | Yes | Yes |

|        |           |                                                                                 |          |     |     |     |     |     |     |     |
|--------|-----------|---------------------------------------------------------------------------------|----------|-----|-----|-----|-----|-----|-----|-----|
| 28932  | LOC283932 | hypothetical LOC283932                                                          | 3.39E-10 | NA  | No  | No  | Yes | No  | No  | No  |
| 84859  | LRCH3     | leucine-rich repeats and calponin homology (CH) domain containing 3             | 3.40E-10 | No  | Yes | Yes | No  | No  | No  | No  |
| 11316  | COPE      | coatomer protein complex, subunit epsilon                                       | 3.41E-10 | No  | No  | No  | Yes | No  | No  | No  |
| 29956  | LASS2     | LAG1 homolog, ceramide synthase 2                                               | 3.41E-10 | Yes | No  | Yes | No  | No  | No  | No  |
| 8416   | ANXA9     | annexin A9                                                                      | 3.41E-10 | No  | No  | Yes | No  | No  | No  | No  |
| 7712   | ZNF157    | zinc finger protein 157                                                         | 3.43E-10 | NA  | No  | No  | No  | No  | No  | No  |
| 51561  | IL23A     | interleukin 23, alpha subunit p19                                               | 3.49E-10 | No  | No  | Yes | No  | No  | No  | No  |
| 7084   | TK2       | thymidine kinase 2, mitochondrial                                               | 3.55E-10 | Yes | No  | Yes | No  | No  | No  | No  |
| 11278  | KLF12     | Kruppel-like factor 12                                                          | 3.65E-10 | No  | Yes | Yes | No  | No  | No  | No  |
| 9659   | PDE4DIP   | phosphodiesterase 4D interacting protein (myomegalin)                           | 3.68E-10 | Yes | Yes | Yes | No  | No  | Yes | No  |
| 9447   | AIM2      | absent in melanoma 2                                                            | 3.68E-10 | No  | No  | No  | No  | Yes | No  | No  |
| 10209  | EIF1      | eukaryotic translation initiation factor 1                                      | 3.68E-10 | Yes | No  | No  | Yes | No  | No  | No  |
| 7403   | UTX       | ubiquitously transcribed tetratricopeptide repeat, X chromosome                 | 3.78E-10 | No  | No  | Yes | No  | No  | No  | No  |
| 8621   | CDC2L5    | cell division cycle 2-like 5 (cholinesterase-related cell division controller)  | 3.82E-10 | No  | No  | Yes | No  | No  | No  | No  |
| 9738   | CP110     | CP110 protein                                                                   | 3.82E-10 | No  | No  | No  | Yes | No  | No  | No  |
| 5271   | SERPINB8  | serpin peptidase inhibitor, clade B (ovalbumin), member 8                       | 3.82E-10 | No  | No  | No  | Yes | No  | No  | No  |
| 55144  | LRRCB8    | leucine rich repeat containing 8 family, member D                               | 3.86E-10 | Yes | No  | No  | No  | No  | No  | No  |
| 5608   | MAP2K6    | mitogen-activated protein kinase 6                                              | 3.99E-10 | No  | No  | Yes | No  | No  | No  | No  |
| 51282  | SCAND1    | SCAN domain containing 1                                                        | 4.06E-10 | No  | No  | Yes | No  | No  | No  | No  |
| 146542 | ZNF688    | zinc finger protein 688                                                         | 4.09E-10 | Yes | No  | Yes | No  | No  | No  | No  |
| 81620  | CDT1      | chromatin licensing and DNA replication factor 1                                | 4.10E-10 | No  | No  | Yes | No  | No  | No  | No  |
| 55884  | WSB2      | WD repeat and SOCS box-containing 2                                             | 4.11E-10 | No  | No  | Yes | No  | No  | No  | No  |
| 129685 | TAF8      | TAF8 RNA polymerase II, TATA box binding protein (TBP)-associated factor, 43kDa | 4.16E-10 | No  | No  | Yes | No  | No  | No  | No  |
| 6518   | SLC2A5    | solute carrier family 2 (facilitated glucose/fructose transporter), member 5    | 4.23E-10 | No  | Yes | Yes | No  | No  | Yes | No  |
| 518    | ATP5G3    | ATP synthase, H+ transporting, mitochondrial FO complex, subunit C3 (subunit 9) | 4.27E-10 | No  | No  | Yes | No  | No  | No  | No  |
| 64852  | TUT1      | terminal uridylyl transferase 1, U6 snRNA-specific                              | 4.30E-10 | No  | No  | No  | Yes | No  | No  | No  |
| 9805   | SCRN1     | secernin 1                                                                      | 4.39E-10 | No  | No  | Yes | No  | No  | No  | No  |
| 153020 | RASGEF1B  | RasGEF domain family, member 1B                                                 | 4.45E-10 | No  | No  | No  | No  | Yes | Yes | No  |
| 9147   | SDCCAG1   | serologically defined colon cancer antigen 1                                    | 4.50E-10 | Yes | No  | No  | Yes | No  | No  | No  |
| 678    | ZFP36L2   | zinc finger protein 36, C3H type-like 2                                         | 4.52E-10 | Yes | No  | No  | Yes | No  | No  | No  |
| 4439   | MSH5      | mutS homolog 5 (E. coli)                                                        | 4.57E-10 | Yes | No  | No  | Yes | No  | No  | No  |
| 1192   | CLIC1     | chloride intracellular channel 1                                                | 4.57E-10 | No  | No  | No  | Yes | No  | Yes | Yes |
| 10471  | PFDN6     | prefoldin subunit 6                                                             | 4.64E-10 | No  | No  | Yes | No  | No  | No  | No  |
| 390083 | OR56A3    | olfactory receptor, family 56, subfamily A, member 3                            | 4.65E-10 | NA  | No  | Yes | No  | No  | No  | No  |



|        |           |                                                           |          |     |     |     |     |     |     |     |
|--------|-----------|-----------------------------------------------------------|----------|-----|-----|-----|-----|-----|-----|-----|
| 2904   | GRIN2B    | glutamate receptor, ionotropic, N-methyl D-aspartate 2B   | 4.65E-10 | No  | No  | Yes | No  | No  | No  | No  |
| 205428 | C3orf58   | chromosome 3 open reading frame 58                        | 4.96E-10 | Yes | No  | Yes | No  | No  | No  | No  |
| 329    | BIRC2     | baculoviral IAP repeat-containing 2                       | 5.01E-10 | No  | No  | Yes | No  | No  | Yes | No  |
| 7112   | TMPO      | thymopoietin                                              | 5.02E-10 | No  | No  | Yes | No  | No  | No  | No  |
| 7767   | ZNF224    | zinc finger protein 224                                   | 5.10E-10 | Yes | No  | Yes | No  | No  | Yes | No  |
| 81930  | KIF18A    | kinesin family member 18A                                 | 5.10E-10 | No  | No  | Yes | No  | No  | No  | No  |
| 146691 | TOM1L2    | target of myb1-like 2 (chicken)                           | 5.14E-10 | Yes | No  | Yes | No  | No  | No  | No  |
| 83450  | LRRC48    | leucine rich repeat containing 48                         | 5.14E-10 | No  | No  | Yes | No  | No  | No  | No  |
| 151648 | SGOL1     | shugoshin-like 1 (S. pombe)                               | 5.19E-10 | No  | No  | Yes | No  | No  | No  | No  |
| 1027   | CDKN1B    | cyclin-dependent kinase inhibitor 1B (p27, Kip1)          | 5.30E-10 | Yes | No  | No  | Yes | No  | Yes | Yes |
| 4602   | MYB       | v-myb myeloblastosis viral oncogene homolog (avian)       | 5.31E-10 | No  | No  | Yes | No  | No  | No  | No  |
| 11183  | MAP4K5    | mitogen-activated protein kinase kinase kinase kinase 5   | 5.39E-10 | No  | No  | No  | Yes | No  | No  | No  |
| 22847  | ZNF507    | zinc finger protein 507                                   | 5.39E-10 | No  | No  | No  | No  | Yes | No  | No  |
| 1431   | CS        | citrate synthase                                          | 5.43E-10 | No  | No  | Yes | No  | No  | No  | No  |
| 25852  | ARMC8     | armadillo repeat containing 8                             | 5.48E-10 | Yes | No  | No  | Yes | No  | No  | No  |
| 50999  | TMED5     | transmembrane emp24 protein transport domain containing 5 | 5.51E-10 | Yes | No  | Yes | No  | No  | No  | No  |
| 285696 | FLJ34047  | hypothetical protein FLJ34047                             | 5.52E-10 | NA  | No  | No  | No  | No  | No  | No  |
| 8970   | HIST1H2BJ | histone cluster 1, H2bj                                   | 5.53E-10 | No  | No  | Yes | No  | No  | Yes | No  |
| 90768  | MGC45800  | hypothetical protein LOC90768                             | 5.67E-10 | No  | No  | Yes | No  | No  | No  | No  |
| 84549  | MAK16     | MAK16 homolog (S. cerevisiae)                             | 5.70E-10 | No  | No  | No  | Yes | No  | No  | No  |
| 54865  | GPATCH4   | G patch domain containing 4                               | 5.74E-10 | Yes | No  | Yes | No  | No  | No  | No  |
| 1073   | CFL2      | cofilin 2 (muscle)                                        | 5.79E-10 | No  | No  | Yes | No  | No  | No  | No  |
| 339318 | ZNF181    | zinc finger protein 181                                   | 5.91E-10 | Yes | No  | No  | Yes | No  | No  | No  |
| 8837   | CFLAR     | CASP8 and FADD-like apoptosis regulator                   | 5.93E-10 | Yes | No  | Yes | No  | No  | No  | No  |
| 933    | CD22      | CD22 molecule                                             | 5.98E-10 | No  | No  | No  | Yes | No  | Yes | No  |
| 8078   | USP5      | ubiquitin specific peptidase 5 (isopeptidase T)           | 6.14E-10 | No  | No  | No  | Yes | No  | No  | No  |
| 83461  | CDCA3     | cell division cycle associated 3                          | 6.14E-10 | No  | No  | No  | Yes | No  | No  | No  |
| 80025  | PANK2     | pantothenate kinase 2 (Hallervorden-Spatz syndrome)       | 6.52E-10 | No  | No  | Yes | No  | No  | No  | No  |
| 8289   | ARID1A    | AT rich interactive domain 1A (SWI-like)                  | 6.54E-10 | Yes | No  | Yes | No  | No  | No  | No  |
| 9400   | RECOL5    | RecQ protein-like 5                                       | 6.61E-10 | No  | Yes | No  | No  | Yes | No  | No  |
| 60494  | CCDC81    | coiled-coil domain containing 81                          | 6.66E-10 | No  | No  | Yes | No  | No  | No  | No  |
| 138724 | C9orf131  | chromosome 9 open reading frame 131                       | 6.66E-10 | No  | No  | No  | Yes | No  | No  | No  |
| 84230  | LRRC8C    | leucine rich repeat containing 8 family, member C         | 6.69E-10 | Yes | No  | No  | Yes | No  | No  | No  |
| 147015 | DHRS13    | dehydrogenase/reductase (SDR family) member 13            | 6.69E-10 | Yes | No  | No  | Yes | No  | No  | No  |

|        |          |                                                                                     |          |     |     |     |     |    |     |     |
|--------|----------|-------------------------------------------------------------------------------------|----------|-----|-----|-----|-----|----|-----|-----|
| 6118   | RPA2     | replication protein A2, 32kDa                                                       | 6.70E-10 | No  | No  | Yes | No  | No | No  | No  |
| 10451  | VAV3     | vav 3 guanine nucleotide exchange factor                                            | 6.74E-10 | Yes | No  | Yes | No  | No | No  | No  |
| 3588   | IL10RB   | interleukin 10 receptor, beta                                                       | 6.75E-10 | Yes | Yes | Yes | No  | No | Yes | Yes |
| 57649  | PHF12    | PHD finger protein 12                                                               | 6.76E-10 | No  | No  | Yes | No  | No | No  | No  |
| 116448 | OLIG1    | oligodendrocyte transcription factor 1                                              | 6.80E-10 | No  | No  | Yes | No  | No | No  | No  |
| 6293   | VPS52    | vacuolar protein sorting 52 homolog (S. cerevisiae)                                 | 6.85E-10 | No  | No  | Yes | No  | No | Yes | No  |
| 6222   | RPS18    | ribosomal protein S18                                                               | 6.85E-10 | No  | No  | Yes | No  | No | Yes | No  |
| 56006  | C19orf61 | chromosome 19 open reading frame 61                                                 | 6.94E-10 | No  | No  | Yes | No  | No | Yes | No  |
| 7091   | TLE4     | transducin-like enhancer of split 4 (E(sp1) homolog, Drosophila)                    | 7.11E-10 | Yes | No  | Yes | No  | No | No  | No  |
| 608    | TNFRSF17 | tumor necrosis factor receptor superfamily, member 17                               | 7.23E-10 | No  | No  | Yes | No  | No | No  | No  |
| 143    | PARP4    | poly (ADP-ribose) polymerase family, member 4                                       | 7.27E-10 | Yes | No  | Yes | No  | No | No  | No  |
| 10916  | MAGED2   | melanoma antigen family D, 2                                                        | 7.28E-10 | No  | No  | Yes | No  | No | No  | No  |
| 944    | TNFSF8   | tumor necrosis factor (ligand) superfamily, member 8                                | 7.28E-10 | No  | Yes | Yes | No  | No | No  | No  |
| 146330 | FBXL16   | F-box and leucine-rich repeat protein 16                                            | 7.45E-10 | No  | No  | No  | Yes | No | No  | No  |
| 6386   | SDCBP    | syndecan binding protein (syntenin)                                                 | 7.49E-10 | No  | No  | Yes | No  | No | Yes | No  |
| 4848   | CNOT2    | CCR4-NOT transcription complex, subunit 2                                           | 7.65E-10 | No  | Yes | Yes | No  | No | No  | No  |
| 2971   | GTF3A    | general transcription factor IIIA                                                   | 7.66E-10 | Yes | No  | Yes | No  | No | No  | No  |
| 23210  | JMJD6    | jumonji domain containing 6                                                         | 7.74E-10 | Yes | No  | Yes | No  | No | No  | No  |
| 81704  | DOCK8    | dedicator of cytokinesis 8                                                          | 7.80E-10 | Yes | No  | Yes | No  | No | Yes | No  |
| 53     | ACP2     | acid phosphatase 2, lysosomal                                                       | 7.84E-10 | No  | No  | No  | Yes | No | Yes | No  |
| 4796   | NFKBIL2  | nuclear factor of kappa light polypeptide gene enhancer in B-cells inhibitor-like 2 | 7.98E-10 | No  | No  | Yes | No  | No | No  | No  |
| 4299   | AFF1     | AF4/FMR2 family, member 1                                                           | 8.00E-10 | Yes | No  | No  | Yes | No | Yes | Yes |
| 55159  | RFWD3    | ring finger and WD repeat domain 3                                                  | 8.11E-10 | No  | No  | Yes | No  | No | No  | No  |
| 5218   | PFTK1    | PFTAIRE protein kinase 1                                                            | 8.17E-10 | No  | No  | Yes | No  | No | Yes | No  |
| 57405  | SPC25    | SPC25, NDC80 kinetochore complex component, homolog (S. cerevisiae)                 | 8.42E-10 | No  | No  | No  | Yes | No | Yes | No  |
| 57818  | G6PC2    | glucose-6-phosphatase, catalytic, 2                                                 | 8.42E-10 | No  | No  | No  | Yes | No | No  | No  |
| 23451  | SF3B1    | splicing factor 3b, subunit 1, 155kDa                                               | 8.53E-10 | No  | No  | No  | Yes | No | Yes | No  |
| 220136 | CCDC11   | coiled-coil domain containing 11                                                    | 8.56E-10 | No  | No  | Yes | No  | No | No  | No  |
| 8573   | CASK     | calcium/calmodulin-dependent serine protein kinase (MAGUK family)                   | 8.74E-10 | Yes | No  | Yes | No  | No | No  | No  |
| 5557   | PRIM1    | primase, DNA, polypeptide 1 (49kDa)                                                 | 8.78E-10 | No  | No  | Yes | No  | No | No  | No  |
| 5514   | PPP1R10  | protein phosphatase 1, regulatory (inhibitor) subunit 10                            | 8.79E-10 | No  | No  | Yes | No  | No | Yes | No  |
| 6787   | NEK4     | NIMA (never in mitosis gene a)-related kinase 4                                     | 9.23E-10 | No  | No  | Yes | No  | No | No  | No  |
| 3697   | ITIH1    | inter-alpha (globulin) inhibitor H1                                                 | 9.23E-10 | No  | No  | Yes | No  | No | No  | No  |
| 225    | ABCD2    | ATP-binding cassette, sub-family D (ALD), member 2                                  | 9.29E-10 | Yes | No  | Yes | No  | No | Yes | No  |

|        |          |                                                                                       |          |     |     |     |     |     |     |     |
|--------|----------|---------------------------------------------------------------------------------------|----------|-----|-----|-----|-----|-----|-----|-----|
| 84869  | CBR4     | carbonyl reductase 4                                                                  | 9.35E-10 | No  | No  | Yes | No  | No  | No  | No  |
| 5546   | PRCC     | papillary renal cell carcinoma (translocation-associated)                             | 9.36E-10 | No  |
| 8444   | DYRK3    | dual-specificity tyrosine-(Y)-phosphorylation regulated kinase 3                      | 9.36E-10 | No  | No  | No  | Yes | No  | No  | No  |
| 9592   | IER2     | immediate early response 2                                                            | 9.36E-10 | Yes | No  | Yes | No  | No  | Yes | Yes |
| 23382  | AHCYL2   | S-adenosylhomocysteine hydrolase-like 2                                               | 9.43E-10 | Yes | No  | Yes | No  | No  | Yes | No  |
| 22803  | XRN2     | 5'-3' exonuclease 2                                                                   | 9.58E-10 | No  | No  | Yes | No  | No  | No  | No  |
| 8615   | USO1     | USO1 homolog, vesicle docking protein (yeast)                                         | 9.72E-10 | Yes | No  | Yes | No  | No  | Yes | No  |
| 84101  | USP44    | ubiquitin specific peptidase 44                                                       | 9.76E-10 | No  | No  | Yes | No  | No  | No  | No  |
| 23433  | RHOQ     | ras homolog gene family, member Q                                                     | 9.82E-10 | No  | No  | Yes | No  | No  | No  | No  |
| 55703  | POLR3B   | polymerase (RNA) III (DNA directed) polypeptide B                                     | 9.86E-10 | No  | No  | Yes | No  | No  | No  | No  |
| 3437   | IFIT3    | interferon-induced protein with tetratricopeptide repeats 3                           | 9.96E-10 | Yes | Yes | No  | Yes | No  | Yes | No  |
| 23478  | SEC11A   | SEC11 homolog A (S. cerevisiae)                                                       | 1.01E-09 | No  | No  | No  | No  | Yes | No  | No  |
| 151613 | TTC14    | tetratricopeptide repeat domain 14                                                    | 1.02E-09 | Yes | No  | Yes | No  | No  | No  | No  |
| 29777  | ABT1     | activator of basal transcription 1                                                    | 1.03E-09 | No  | No  | Yes | No  | No  | Yes | No  |
| 83591  | THAP2    | THAP domain containing, apoptosis associated protein 2                                | 1.04E-09 | No  | No  | Yes | No  | No  | Yes | No  |
| 153129 | SLC38A9  | solute carrier family 38, member 9                                                    | 1.04E-09 | No  | No  | Yes | No  | No  | No  | No  |
| 3775   | KCNK1    | potassium channel, subfamily K, member 1                                              | 1.05E-09 | No  | No  | No  | Yes | No  | No  | No  |
| 57125  | PLXDC1   | plexin domain containing 1                                                            | 1.06E-09 | No  | No  | No  | Yes | No  | No  | No  |
| 146845 | WDR16    | WD repeat domain 16                                                                   | 1.06E-09 | No  | No  | Yes | No  | No  | Yes | No  |
| 80830  | APOL6    | apolipoprotein L, 6                                                                   | 1.07E-09 | Yes | No  | Yes | No  | No  | Yes | No  |
| 80012  | PHC3     | polyhomeotic homolog 3 (Drosophila)                                                   | 1.09E-09 | Yes | No  | Yes | No  | No  | No  | No  |
| 10865  | ARID5A   | AT rich interactive domain 5A (MRF1-like)                                             | 1.11E-09 | Yes | No  | Yes | No  | No  | Yes | Yes |
| 2124   | EVI2B    | ecotropic viral integration site 2B                                                   | 1.12E-09 | No  | No  | Yes | No  | No  | No  | No  |
| 3344   | FOXP2    | forkhead box N2                                                                       | 1.14E-09 | Yes | No  | No  | Yes | No  | No  | No  |
| 23043  | TNIK     | TRAF2 and NCK interacting kinase                                                      | 1.16E-09 | Yes | No  | Yes | No  | No  | No  | No  |
| 9349   | RPL23    | ribosomal protein L23                                                                 | 1.16E-09 | No  | No  | Yes | No  | No  | No  | No  |
| 55662  | HIF1AN   | hypoxia-inducible factor 1, alpha subunit inhibitor                                   | 1.16E-09 | No  | No  | No  | Yes | No  | No  | No  |
| 4714   | NDUFB8   | NADH dehydrogenase (ubiquinone) 1 beta subcomplex, 8, 19kDa                           | 1.16E-09 | No  | No  | No  | Yes | No  | No  | No  |
| 220002 | CYBASC3  | cytochrome b, ascorbate dependent 3                                                   | 1.18E-09 | No  | No  | Yes | No  | No  | No  | No  |
| 84792  | MGC12966 | hypothetical protein LOC84792                                                         | 1.19E-09 | No  | No  | Yes | No  | No  | No  | No  |
| 10423  | CDIPT    | CDP-diacylglycerol-inositol 3-phosphatidyltransferase (phosphatidylinositol synthase) | 1.21E-09 | No  | No  | Yes | No  | No  | No  | No  |
| 51645  | PPIL1    | peptidylprolyl isomerase (cyclophilin)-like 1                                         | 1.22E-09 | No  | No  | Yes | No  | No  | Yes | No  |
| 55971  | BAIAP2L1 | BAI1-associated protein 2-like 1                                                      | 1.22E-09 | No  | No  | No  | No  | Yes | No  | No  |
| 81894  | SLC25A28 | solute carrier family 25, member 28                                                   | 1.22E-09 | Yes | No  | Yes | No  | No  | No  | No  |

|        |         |                                                                              |          |     |     |     |     |     |     |     |
|--------|---------|------------------------------------------------------------------------------|----------|-----|-----|-----|-----|-----|-----|-----|
| 140890 | SFRS12  | splicing factor, arginine/serine-rich 12                                     | 1.23E-09 | No  | No  | Yes | No  | No  | No  | No  |
| 79735  | TBC1D17 | TBC1 domain family, member 17                                                | 1.25E-09 | Yes | No  | No  | Yes | No  | Yes | No  |
| 5868   | RAB5A   | RAB5A, member RAS oncogene family                                            | 1.25E-09 | No  | No  | Yes | No  | No  | No  | No  |
| 6461   | SHB     | Src homology 2 domain containing adaptor protein B                           | 1.26E-09 | Yes | No  | Yes | No  | No  | No  | No  |
| 2820   | GPD2    | glycerol-3-phosphate dehydrogenase 2 (mitochondrial)                         | 1.28E-09 | No  | No  | Yes | No  | No  | No  | No  |
| 2857   | GPR34   | G protein-coupled receptor 34                                                | 1.29E-09 | Yes | No  | Yes | No  | No  | No  | No  |
| 26999  | CYFIP2  | cytoplasmic FMR1 interacting protein 2                                       | 1.29E-09 | No  | No  | No  | Yes | No  | No  | No  |
| 79947  | DHDDS   | dehydrodolichyl diphosphate synthase                                         | 1.29E-09 | No  | Yes | No  | Yes | No  | No  | No  |
| 23216  | TBC1D1  | TBC1 (tre-2/USP6, BUB2, cdc16) domain family, member 1                       | 1.29E-09 | No  | No  | No  | No  | Yes | No  | No  |
| 92979  | 9-Mar   | membrane-associated ring finger (C3HC4) 9                                    | 1.30E-09 | Yes | No  | No  | Yes | No  | No  | No  |
| 1019   | CDK4    | cyclin-dependent kinase 4                                                    | 1.30E-09 | No  | No  | No  | Yes | No  | No  | No  |
| 134266 | GRPEL2  | GrpE-like 2, mitochondrial (E. coli)                                         | 1.32E-09 | No  | No  | Yes | No  | No  | No  | No  |
| 83891  | SNX25   | sorting nexin 25                                                             | 1.34E-09 | Yes | No  | Yes | No  | No  | No  | No  |
| 5830   | PEX5    | peroxisomal biogenesis factor 5                                              | 1.39E-09 | No  | Yes | No  | No  | Yes | No  | No  |
| 7593   | MZF1    | myeloid zinc finger 1                                                        | 1.39E-09 | Yes | No  | No  | No  | No  | No  | No  |
| 6049   | RNF6    | ring finger protein (C3H2C3 type) 6                                          | 1.41E-09 | No  | No  | No  | Yes | No  | Yes | No  |
| 4092   | SMAD7   | SMAD family member 7                                                         | 1.45E-09 | Yes | No  | Yes | No  | No  | No  | No  |
| 5833   | UBAP2   | ubiquitin associated protein 2                                               | 1.45E-09 | No  | No  | Yes | No  | No  | No  | No  |
| 81614  | NIPA2   | non imprinted in Prader-Willi/Angelman syndrome 2                            | 1.45E-09 | Yes | Yes | Yes | No  | No  | No  | No  |
| 4082   | MARCKS  | myristoylated alanine-rich protein kinase C substrate                        | 1.45E-09 | Yes | Yes | No  | Yes | No  | Yes | Yes |
| 5479   | PPIB    | peptidylprolyl isomerase B (cyclophilin B)                                   | 1.45E-09 | No  | No  | Yes | No  | No  | No  | No  |
| 1662   | DDX10   | DEAD (Asp-Glu-Ala-Asp) box polypeptide 10                                    | 1.45E-09 | No  | No  | Yes | No  | No  | Yes | Yes |
| 55904  | MLL5    | myeloid/lymphoid or mixed-lineage leukemia 5 (trithorax homolog, Drosophila) | 1.48E-09 | Yes | Yes | No  | Yes | No  | Yes | No  |
| 8193   | DPF1    | D4, zinc and double PHD fingers family 1                                     | 1.48E-09 | Yes | No  | No  | Yes | No  | No  | No  |
| 5682   | PSMA1   | proteasome (prosome, macropain) subunit, alpha type, 1                       | 1.56E-09 | No  | No  | Yes | No  | No  | No  | No  |
| 22849  | CPEB3   | cytoplasmic polyadenylation element binding protein 3                        | 1.60E-09 | No  | No  | No  | Yes | No  | Yes | No  |
| 3099   | HK2     | hexokinase 2                                                                 | 1.60E-09 | Yes | No  | No  | Yes | No  | No  | No  |
| 6146   | RPL22   | ribosomal protein L22                                                        | 1.65E-09 | Yes | No  | Yes | No  | No  | No  | No  |
| 6418   | SET     | SET nuclear oncogene                                                         | 1.65E-09 | No  | No  | Yes | No  | No  | No  | No  |
| 2005   | ELK4    | ELK4, ETS-domain protein (SRF accessory protein 1)                           | 1.65E-09 | No  | No  | Yes | No  | No  | No  | No  |
| 54554  | WDR5B   | WD repeat domain 5B                                                          | 1.67E-09 | Yes | Yes | Yes | No  | No  | No  | No  |
| 9043   | SPAG9   | sperm associated antigen 9                                                   | 1.67E-09 | No  | No  | No  | Yes | No  | Yes | No  |
| 51696  | HECA    | headcase homolog (Drosophila)                                                | 1.70E-09 | No  | No  | Yes | No  | No  | No  | No  |
| 51631  | LUC7L2  | LUC7-like 2 (S. cerevisiae)                                                  | 1.70E-09 | No  | No  | No  | No  | Yes | Yes | No  |

|        |          |                                                             |          |     |     |     |     |     |     |    |
|--------|----------|-------------------------------------------------------------|----------|-----|-----|-----|-----|-----|-----|----|
| 124540 | MSI2     | musashi homolog 2 (Drosophila)                              | 1.73E-09 | No  | No  | No  | Yes | No  | No  | No |
| 2864   | FFAR1    | free fatty acid receptor 1                                  | 1.79E-09 | Yes | No  | Yes | No  | No  | No  | No |
| 390152 | OR8H3    | olfactory receptor, family 8, subfamily H, member 3         | 1.80E-09 | NA  | No  | Yes | No  | No  | No  | No |
| 1326   | MAP3K8   | mitogen-activated protein kinase kinase kinase 8            | 1.81E-09 | No  | No  | Yes | No  | No  | Yes | No |
| 643    | CXCR5    | chemokine (C-X-C motif) receptor 5                          | 1.82E-09 | Yes | No  | No  | Yes | No  | No  | No |
| 84623  | KIRREL3  | kin of IRRE like 3 (Drosophila)                             | 1.82E-09 | No  | No  | Yes | No  | No  | No  | No |
| 136319 | MTPN     | myotrophin                                                  | 1.82E-09 | Yes | No  | No  | No  | Yes | Yes | No |
| 51574  | LARP7    | La ribonucleoprotein domain family, member 7                | 1.83E-09 | No  | No  | Yes | No  | No  | No  | No |
| 55345  | C4orf21  | chromosome 4 open reading frame 21                          | 1.83E-09 | No  | No  | Yes | No  | No  | No  | No |
| 26001  | RNF167   | ring finger protein 167                                     | 1.83E-09 | No  | No  | No  | Yes | No  | No  | No |
| 10927  | SPIN1    | spindlin 1                                                  | 1.83E-09 | No  | No  | Yes | No  | No  | Yes | No |
| 81544  | GDPD5    | glycerophosphodiester phosphodiesterase domain containing 5 | 1.84E-09 | No  | No  | Yes | No  | No  | No  | No |
| 54726  | OTUD4    | OTU domain containing 4                                     | 1.87E-09 | No  | No  | No  | No  | Yes | No  | No |
| 55329  | MNS1     | meiosis-specific nuclear structural 1                       | 1.88E-09 | No  | No  | Yes | No  | No  | No  | No |
| 58478  | ENOPH1   | enolase-phosphatase 1                                       | 1.89E-09 | No  | No  | Yes | No  | No  | No  | No |
| 6003   | RGS13    | regulator of G-protein signaling 13                         | 1.92E-09 | No  | Yes | Yes | No  | No  | No  | No |
| 5393   | EXOSC9   | exosome component 9                                         | 1.93E-09 | No  | No  | Yes | No  | No  | No  | No |
| 25     | ABL1     | c-abl oncogene 1, receptor tyrosine kinase                  | 1.94E-09 | No  | No  | No  | Yes | No  | No  | No |
| 6231   | RPS26    | ribosomal protein S26                                       | 1.95E-09 | No  | No  | Yes | No  | No  | No  | No |
| 55170  | PRMT6    | protein arginine methyltransferase 6                        | 1.96E-09 | No  | No  | Yes | No  | No  | No  | No |
| 64745  | METT11D1 | methyltransferase 11 domain containing 1                    | 1.97E-09 | No  | No  | No  | Yes | No  | No  | No |
| 5828   | PXMP3    | peroxisomal membrane protein 3, 35kDa (Zellweger syndrome)  | 1.97E-09 | No  | No  | Yes | No  | No  | No  | No |
| 7258   | TSPY1    | testis specific protein, Y-linked 1                         | 2.02E-09 | NA  | No  | No  | No  | Yes | No  | No |
| 692087 | SNORD49B | small nucleolar RNA, C/D box 49B                            | 2.04E-09 | NA  | No  | Yes | No  | No  | No  | No |
| 8874   | ARHGEF7  | Rho guanine nucleotide exchange factor (GEF) 7              | 2.05E-09 | No  | No  | Yes | No  | No  | Yes | No |
| 1361   | CPB2     | carboxypeptidase B2 (plasma)                                | 2.08E-09 | No  | No  | Yes | No  | No  | No  | No |
| 54509  | RHOF     | ras homolog gene family, member F (in filopodia)            | 2.15E-09 | Yes | No  | Yes | No  | No  | Yes | No |
| 989    | SEPT7    | septin 7                                                    | 2.15E-09 | No  | No  | Yes | No  | No  | No  | No |
| 11338  | U2AF2    | U2 small nuclear RNA auxiliary factor 2                     | 2.16E-09 | No  | No  | No  | No  | No  | No  | No |
| 4490   | MT1B     | metallothionein 1B                                          | 2.17E-09 | NA  | No  | No  | Yes | No  | No  | No |
| 10926  | DBF4     | DBF4 homolog (S. cerevisiae)                                | 2.18E-09 | No  | No  | Yes | No  | No  | No  | No |
| 55508  | SLC35E3  | solute carrier family 35, member E3                         | 2.20E-09 | No  | No  | Yes | No  | No  | No  | No |
| 10782  | ZNF274   | zinc finger protein 274                                     | 2.30E-09 | Yes | No  | No  | Yes | No  | No  | No |
| 8661   | EIF3A    | eukaryotic translation initiation factor 3, subunit A       | 2.30E-09 | No  | No  | Yes | No  | No  | No  | No |

|        |           |                                                                                          |          |     |     |     |     |     |     |     |
|--------|-----------|------------------------------------------------------------------------------------------|----------|-----|-----|-----|-----|-----|-----|-----|
| 84881  | RPUSD4    | RNA pseudouridylylate synthase domain containing 4                                       | 2.31E-09 | No  | No  | No  | No  | Yes | No  | No  |
| 11198  | SUPT16H   | suppressor of Ty 16 homolog (S. cerevisiae)                                              | 2.34E-09 | No  | No  | No  | Yes | No  | No  | No  |
| 675    | BRCA2     | breast cancer 2, early onset                                                             | 2.35E-09 | No  | No  | Yes | No  | No  | No  | No  |
| 80831  | APOL5     | apolipoprotein L, 5                                                                      | 2.35E-09 | No  | No  | Yes | No  | No  | No  | No  |
| 6617   | SNAPC1    | small nuclear RNA activating complex, polypeptide 1, 43kDa                               | 2.36E-09 | No  | No  | No  | Yes | No  | No  | No  |
| 6714   | SRC       | v-src sarcoma (Schmidt-Ruppin A-2) viral oncogene homolog (avian)                        | 2.38E-09 | Yes | No  | Yes | No  | No  | No  | No  |
| 84437  | KIAA1826  | KIAA1826                                                                                 | 2.38E-09 | No  | No  | No  | Yes | No  | No  | No  |
| 10116  | FEM1B     | fem-1 homolog b (C. elegans)                                                             | 2.39E-09 | No  | No  | No  | No  | No  | Yes | No  |
| 133686 | C5orf33   | chromosome 5 open reading frame 33                                                       | 2.41E-09 | No  | No  | Yes | No  | No  | No  | No  |
| 3455   | IFNAR2    | interferon (alpha, beta and omega) receptor 2                                            | 2.41E-09 | Yes | Yes | Yes | No  | No  | No  | No  |
| 153443 | SRFBP1    | serum response factor binding protein 1                                                  | 2.45E-09 | Yes | No  | Yes | No  | No  | No  | No  |
| 64591  | TSPY2     | testis specific protein, Y-linked 2                                                      | 2.46E-09 | No  | No  | No  | No  | Yes | No  | No  |
| 952    | CD38      | CD38 molecule                                                                            | 2.49E-09 | No  | No  | Yes | No  | No  | Yes | No  |
| 805    | CALM2     | calmodulin 2 (phosphorylase kinase, delta)                                               | 2.53E-09 | No  | No  | No  | No  | Yes | No  | No  |
| 89882  | TPD52L3   | tumor protein D52-like 3                                                                 | 2.56E-09 | No  |
| 5201   | PFDN1     | prefoldin subunit 1                                                                      | 2.57E-09 | No  | No  | Yes | No  | No  | No  | No  |
| 401152 | LOC401152 | HCV F-transactivated protein 1                                                           | 2.57E-09 | No  | No  | No  | No  | Yes | Yes | No  |
| 4193   | MDM2      | Mdm2 p53 binding protein homolog (mouse)                                                 | 2.58E-09 | No  | No  | Yes | No  | No  | No  | No  |
| 51191  | HERC5     | hect domain and RLD 5                                                                    | 2.58E-09 | Yes | Yes | No  | Yes | No  | Yes | No  |
| 23366  | KIAA0895  | KIAA0895 protein                                                                         | 2.59E-09 | No  | No  | Yes | No  | No  | No  | No  |
| 9184   | BUB3      | BUB3 budding uninhibited by benzimidazoles 3 homolog (yeast)                             | 2.62E-09 | No  | No  | Yes | No  | No  | Yes | No  |
| 22913  | RALY      | RNA binding protein, autoantigenic (hnRNP-associated with lethal yellow homolog (mouse)) | 2.66E-09 | Yes | No  | Yes | No  | No  | Yes | No  |
| 84987  | C12orf62  | chromosome 12 open reading frame 62                                                      | 2.71E-09 | No  | No  | No  | Yes | No  | No  | No  |
| 2665   | GDI2      | GDP dissociation inhibitor 2                                                             | 2.75E-09 | No  | No  | No  | No  | No  | Yes | No  |
| 79573  | TTC13     | tetratricopeptide repeat domain 13                                                       | 2.80E-09 | No  | No  | Yes | No  | No  | Yes | No  |
| 393    | ARHGAP4   | Rho GTPase activating protein 4                                                          | 2.80E-09 | Yes | No  | No  | No  | Yes | Yes | Yes |
| 57532  | NUFIP2    | nuclear fragile X mental retardation protein interacting protein 2                       | 2.81E-09 | Yes | No  | Yes | No  | No  | No  | No  |
| 8910   | SGCE      | sarcoglycan, epsilon                                                                     | 2.82E-09 | No  | No  | Yes | No  | No  | Yes | No  |
| 51768  | TM7SF3    | transmembrane 7 superfamily member 3                                                     | 2.82E-09 | Yes | No  | Yes | No  | No  | Yes | No  |
| 9412   | MED21     | mediator complex subunit 21                                                              | 2.82E-09 | No  | No  | Yes | No  | No  | No  | No  |
| 3024   | HIST1H1A  | histone cluster 1, H1a                                                                   | 2.85E-09 | No  | No  | No  | Yes | No  | No  | No  |
| 8350   | HIST1H3A  | histone cluster 1, H3a                                                                   | 2.85E-09 | No  | No  | No  | Yes | No  | No  | No  |
| 23184  | MESDC2    | mesoderm development candidate 2                                                         | 2.86E-09 | No  | Yes | Yes | No  | No  | No  | No  |
| 55582  | KIF27     | kinesin family member 27                                                                 | 2.96E-09 | Yes | No  | Yes | No  | No  | No  | No  |

|        |           |                                                              |          |     |     |     |     |     |     |     |
|--------|-----------|--------------------------------------------------------------|----------|-----|-----|-----|-----|-----|-----|-----|
| 6653   | SORL1     | sortilin-related receptor, L(DLR class) A repeats-containing | 2.98E-09 | No  | Yes | Yes | No  | No  | Yes | No  |
| 6228   | RPS23     | ribosomal protein S23                                        | 3.01E-09 | No  | No  | Yes | No  | No  | No  | No  |
| 22884  | WDR37     | WD repeat domain 37                                          | 3.01E-09 | No  | No  | Yes | No  | No  | Yes | No  |
| 399900 | LOC399900 | hypothetical gene supported by AK093779                      | 3.03E-09 | No  | No  | Yes | No  | No  | Yes | No  |
| 4999   | ORC2L     | origin recognition complex, subunit 2-like (yeast)           | 3.03E-09 | No  | No  | Yes | No  | No  | No  | No  |
| 83855  | KLF16     | Kruppel-like factor 16                                       | 3.07E-09 | Yes | No  | No  | No  | No  | No  | No  |
| 10475  | TRIM38    | tripartite motif-containing 38                               | 3.09E-09 | Yes | No  | Yes | No  | No  | Yes | Yes |
| 26039  | SS18L1    | synovial sarcoma translocation gene on chromosome 18-like 1  | 3.10E-09 | No  | No  | Yes | No  | No  | No  | No  |
| 64744  | SMAP2     | stromal membrane-associated GTPase-activating protein 2      | 3.11E-09 | Yes | No  | No  | No  | No  | No  | No  |
| 6201   | RPS7      | ribosomal protein S7                                         | 3.11E-09 | No  | No  | No  | Yes | No  | Yes | No  |
| 199745 | THAP8     | THAP domain containing 8                                     | 3.12E-09 | No  | No  | Yes | No  | No  | No  | No  |
| 10572  | SIVA1     | SIVA1, apoptosis-inducing factor                             | 3.13E-09 | No  | No  | No  | Yes | No  | No  | No  |
| 8358   | HIST1H3B  | histone cluster 1, H3b                                       | 3.15E-09 | No  | No  | Yes | No  | No  | Yes | No  |
| 10042  | HMG2L1    | high-mobility group protein 2-like 1                         | 3.21E-09 | No  | No  | Yes | No  | No  | No  | No  |
| 55226  | NAT10     | N-acetyltransferase 10                                       | 3.23E-09 | No  | No  | Yes | No  | No  | Yes | No  |
| 1435   | CSF1      | colony stimulating factor 1 (macrophage)                     | 3.29E-09 | No  | No  | No  | Yes | No  | No  | No  |
| 9304   | SNORD22   | small nucleolar RNA, C/D box 22                              | 3.34E-09 | NA  | No  | Yes | No  | No  | No  | No  |
| 160518 | MGC24039  | hypothetical protein MGC24039                                | 3.37E-09 | Yes | No  | Yes | No  | No  | No  | No  |
| 226    | ALDOA     | aldolase A, fructose-bisphosphate                            | 3.44E-09 | No  | No  | No  | No  | Yes | No  | No  |
| 140738 | TMEM37    | transmembrane protein 37                                     | 3.48E-09 | Yes | No  | Yes | No  | No  | No  | No  |
| 84888  | SPPL2A    | signal peptide peptidase-like 2A                             | 3.48E-09 | No  | No  | Yes | No  | No  | No  | No  |
| 11083  | DIDO1     | death inducer-obliterator 1                                  | 3.49E-09 | Yes | No  | Yes | No  | No  | No  | No  |
| 254065 | BRWD3     | bromodomain and WD repeat domain containing 3                | 3.50E-09 | No  | No  | Yes | No  | No  | No  | No  |
| 7637   | ZNF84     | zinc finger protein 84                                       | 3.51E-09 | Yes | No  | No  | No  | Yes | No  | No  |
| 3422   | IDI1      | isopentenyl-diphosphate delta isomerase 1                    | 3.52E-09 | No  | No  | Yes | No  | No  | Yes | No  |
| 4283   | CXCL9     | chemokine (C-X-C motif) ligand 9                             | 3.54E-09 | No  | No  | Yes | No  | No  | No  | No  |
| 10735  | STAG2     | stromal antigen 2                                            | 3.54E-09 | No  |
| 9441   | MED26     | mediator complex subunit 26                                  | 3.56E-09 | Yes | No  | No  | No  | No  | No  | No  |
| 51082  | POLR1D    | polymerase (RNA) I polypeptide D, 16kDa                      | 3.58E-09 | No  | No  | No  | No  | Yes | Yes | No  |
| 222484 | LN2       | ligand of numb-protein X 2                                   | 3.58E-09 | No  | No  | No  | No  | Yes | Yes | No  |
| 80345  | ZSCAN16   | zinc finger and SCAN domain containing 16                    | 3.59E-09 | No  | No  | Yes | No  | No  | No  | No  |
| 4325   | MMP16     | matrix metalloproteinase 16 (membrane-inserted)              | 3.62E-09 | Yes | No  | Yes | No  | No  | No  | No  |
| 29893  | PSMC3IP   | PSMC3 interacting protein                                    | 3.63E-09 | No  | No  | No  | No  | Yes | No  | No  |
| 201725 | LOC201725 | hypothetical protein LOC201725                               | 3.69E-09 | No  | No  | Yes | No  | No  | No  | No  |

|        |          |                                                                                                |          |     |     |     |     |     |     |     |
|--------|----------|------------------------------------------------------------------------------------------------|----------|-----|-----|-----|-----|-----|-----|-----|
| 10170  | DHRS9    | dehydrogenase/reductase (SDR family) member 9                                                  | 3.71E-09 | No  | No  | No  | No  | Yes | No  | No  |
| 640    | BLK      | B lymphoid tyrosine kinase                                                                     | 3.71E-09 | Yes | No  | Yes | No  | No  | Yes | Yes |
| 79140  | CCDC28B  | coiled-coil domain containing 28B                                                              | 3.72E-09 | No  |
| 55693  | JMJD2D   | jumonji domain containing 2D                                                                   | 3.72E-09 | No  | No  | Yes | No  | No  | No  | No  |
| 246329 | STAC3    | SH3 and cysteine rich domain 3                                                                 | 3.74E-09 | No  | No  | No  | Yes | No  | No  | No  |
| 7716   | VEZF1    | vascular endothelial zinc finger 1                                                             | 3.75E-09 | No  | No  | Yes | No  | No  | No  | No  |
| 3326   | HSP90AB1 | heat shock protein 90kDa alpha (cytosolic), class B member 1                                   | 3.78E-09 | No  | No  | No  | Yes | No  | Yes | Yes |
| 4300   | MLLT3    | myeloid/lymphoid or mixed-lineage leukemia (trithorax homolog, Drosophila); translocated to, 3 | 3.78E-09 | No  | No  | No  | Yes | No  | Yes | No  |
| 79913  | ACTR5    | ARP5 actin-related protein 5 homolog (yeast)                                                   | 3.85E-09 | No  | No  | Yes | No  | No  | No  | No  |
| 23376  | KIAA0776 | KIAA0776                                                                                       | 3.86E-09 | No  | No  | Yes | No  | No  | No  | No  |
| 1656   | DDX6     | DEAD (Asp-Glu-Ala-Asp) box polypeptide 6                                                       | 3.88E-09 | No  | No  | Yes | No  | No  | Yes | No  |
| 29980  | DONSON   | downstream neighbor of SON                                                                     | 3.89E-09 | No  | No  | Yes | No  | No  | No  | No  |
| 7465   | WEE1     | WEE1 homolog (S. pombe)                                                                        | 3.89E-09 | No  | Yes | Yes | No  | No  | Yes | No  |
| 10010  | TANK     | TRAF family member-associated NFKB activator                                                   | 3.90E-09 | No  | No  | Yes | No  | No  | No  | No  |
| 1213   | CLTC     | clathrin, heavy chain (Hc)                                                                     | 3.97E-09 | No  | No  | Yes | No  | No  | Yes | No  |
| 200844 | C3orf67  | chromosome 3 open reading frame 67                                                             | 3.98E-09 | No  | Yes | No  | Yes | No  | No  | No  |
| 55082  | ARGLU1   | arginine and glutamate rich 1                                                                  | 3.99E-09 | No  | No  | Yes | No  | No  | No  | No  |
| 3157   | HMGCS1   | 3-hydroxy-3-methylglutaryl-Coenzyme A synthase 1 (soluble)                                     | 4.05E-09 | Yes | No  | Yes | No  | No  | No  | No  |
| 64110  | MAGEF1   | melanoma antigen family F, 1                                                                   | 4.08E-09 | No  | No  | Yes | No  | No  | Yes | No  |
| 6091   | ROBO1    | roundabout, axon guidance receptor, homolog 1 (Drosophila)                                     | 4.12E-09 | No  | No  | Yes | No  | No  | No  | No  |
| 151188 | ARL6IP6  | ADP-ribosylaton-like factor 6 interacting protein 6                                            | 4.12E-09 | No  | No  | Yes | No  | No  | No  | No  |
| 8818   | DPM2     | dolichyl-phosphate mannosyltransferase polypeptide 2, regulatory subunit                       | 4.13E-09 | No  | No  | No  | Yes | No  | No  | No  |
| 953    | ENTPD1   | ectonucleoside triphosphate diphosphohydrolase 1                                               | 4.14E-09 | Yes | Yes | No  | Yes | No  | No  | No  |
| 51103  | NDUFAF1  | NADH dehydrogenase (ubiquinone) 1 alpha subcomplex, assembly factor 1                          | 4.15E-09 | No  | No  | Yes | No  | No  | No  | No  |
| 319100 | TAAR6    | trace amine associated receptor 6                                                              | 4.17E-09 | NA  | No  | Yes | No  | No  | No  | No  |
| 7016   | TESK1    | testis-specific kinase 1                                                                       | 4.17E-09 | No  |
| 10078  | TSSC4    | tumor suppressing subtransferable candidate 4                                                  | 4.20E-09 | No  | No  | No  | Yes | No  | No  | No  |
| 2934   | GSN      | gelsolin (amyloidosis, Finnish type)                                                           | 4.24E-09 | Yes | No  | Yes | No  | No  | No  | No  |
| 2961   | GTF2E2   | general transcription factor IIE, polypeptide 2, beta 34kDa                                    | 4.26E-09 | No  | No  | Yes | No  | No  | No  | No  |
| 5429   | POLH     | polymerase (DNA directed), eta                                                                 | 4.26E-09 | No  | No  | Yes | No  | No  | Yes | No  |
| 2060   | EPS15    | epidermal growth factor receptor pathway substrate 15                                          | 4.28E-09 | No  | Yes | Yes | No  | No  | No  | No  |
| 7482   | WNT2B    | wingless-type MMTV integration site family, member 2B                                          | 4.34E-09 | No  | No  | No  | Yes | No  | No  | No  |
| 199870 | FAM76A   | family with sequence similarity 76, member A                                                   | 4.40E-09 | No  | No  | No  | Yes | No  | No  | No  |
| 9734   | HDAC9    | histone deacetylase 9                                                                          | 4.47E-09 | No  | No  | Yes | No  | No  | Yes | No  |



|        |           |                                                                            |          |     |     |     |     |     |     |     |
|--------|-----------|----------------------------------------------------------------------------|----------|-----|-----|-----|-----|-----|-----|-----|
| 283459 | GATC      | glutamyl-tRNA(Gln) amidotransferase, subunit C homolog (bacterial)         | 4.48E-09 | NA  | No  | No  | No  | Yes | No  | No  |
| 152579 | SCFD2     | sec1 family domain containing 2                                            | 4.49E-09 | No  | No  | Yes | No  | No  | Yes | No  |
| 25840  | METTL7A   | methyltransferase like 7A                                                  | 4.54E-09 | No  | No  | No  | Yes | No  | Yes | No  |
| 5873   | RAB27A    | RAB27A, member RAS oncogene family                                         | 4.58E-09 | Yes | No  | Yes | No  | No  | No  | No  |
| 10150  | MBNL2     | muscleblind-like 2 (Drosophila)                                            | 4.62E-09 | No  | No  | Yes | No  | No  | No  | No  |
| 54465  | ETAA1     | Ewing tumor-associated antigen 1                                           | 4.63E-09 | No  | No  | No  | Yes | No  | No  | No  |
| 1849   | DUSP7     | dual specificity phosphatase 7                                             | 4.70E-09 | Yes | No  | Yes | No  | No  | Yes | Yes |
| 78996  | C7orf49   | chromosome 7 open reading frame 49                                         | 4.70E-09 | No  | No  | Yes | No  | No  | No  | No  |
| 11099  | PTPN21    | protein tyrosine phosphatase, non-receptor type 21                         | 4.76E-09 | Yes | No  | Yes | No  | No  | No  | No  |
| 4139   | MARK1     | MAP/microtubule affinity-regulating kinase 1                               | 4.78E-09 | Yes | No  | Yes | No  | No  | No  | No  |
| 92610  | TIFA      | TRAF-interacting protein with forkhead-associated domain                   | 4.78E-09 | No  | No  | Yes | No  | No  | No  | No  |
| 80829  | ZFP91     | zinc finger protein 91 homolog (mouse)                                     | 4.78E-09 | Yes | No  | No  | Yes | No  | No  | No  |
| 6045   | RNF2      | ring finger protein 2                                                      | 4.80E-09 | Yes | No  | No  | Yes | No  | No  | No  |
| 153684 | LOC153684 | hypothetical LOC153684                                                     | 4.84E-09 | Yes | No  | Yes | No  | No  | No  | No  |
| 23154  | NCDN      | neurochondrin                                                              | 4.84E-09 | No  | No  | Yes | No  | No  | No  | No  |
| 10915  | TCERG1    | transcription elongation regulator 1                                       | 4.86E-09 | No  | No  | Yes | No  | No  | No  | No  |
| 2745   | GLRX      | glutaredoxin (thioltransferase)                                            | 4.94E-09 | No  | No  | No  | No  | Yes | No  | No  |
| 79917  | MAGIX     | MAGI family member, X-linked                                               | 4.98E-09 | Yes | No  | Yes | No  | No  | No  | No  |
| 10632  | ATP5L     | ATP synthase, H+ transporting, mitochondrial F0 complex, subunit G         | 4.98E-09 | No  | No  | Yes | No  | No  | No  | No  |
| 401253 | FLJ43752  | FLJ43752 protein                                                           | 4.99E-09 | NA  | No  | No  | Yes | No  | No  | No  |
| 51324  | SPG21     | spastic paraplegia 21 (autosomal recessive, Mast syndrome)                 | 5.00E-09 | No  | No  | No  | Yes | No  | No  | No  |
| 55236  | UBA6      | ubiquitin-like modifier activating enzyme 6                                | 5.07E-09 | No  | No  | Yes | No  | No  | Yes | No  |
| 8934   | RAB7L1    | RAB7, member RAS oncogene family-like 1                                    | 5.07E-09 | Yes | No  | No  | Yes | No  | Yes | Yes |
| 26225  | ARL5A     | ADP-ribosylation factor-like 5A                                            | 5.08E-09 | No  | No  | No  | Yes | No  | No  | No  |
| 3093   | UBE2K     | ubiquitin-conjugating enzyme E2K (UBC1 homolog, yeast)                     | 5.11E-09 | No  | No  | Yes | No  | No  | No  | No  |
| 151050 | C2orf67   | chromosome 2 open reading frame 67                                         | 5.16E-09 | No  | No  | Yes | No  | No  | No  | No  |
| 10409  | BASP1     | brain abundant, membrane attached signal protein 1                         | 5.17E-09 | No  | Yes | Yes | No  | No  | Yes | No  |
| 29916  | SNX11     | sorting nexin 11                                                           | 5.17E-09 | No  | No  | No  | Yes | No  | No  | No  |
| 6309   | SC5DL     | sterol-C5-desaturase (ERG3 delta-5-desaturase homolog, S. cerevisiae)-like | 5.22E-09 | No  | No  | No  | Yes | No  | Yes | No  |
| 4205   | MEF2A     | myocyte enhancer factor 2A                                                 | 5.22E-09 | Yes | No  | Yes | No  | No  | No  | No  |
| 4069   | LYZ       | lysozyme (renal amyloidosis)                                               | 5.26E-09 | No  | No  | No  | Yes | No  | No  | No  |
| 7050   | TGIF1     | TGFB-induced factor homeobox 1                                             | 5.27E-09 | Yes | No  | Yes | No  | No  | No  | No  |
| 10143  | CLEC3A    | C-type lectin domain family 3, member A                                    | 5.29E-09 | No  | No  | Yes | No  | No  | No  | No  |
| 10238  | WDR68     | WD repeat domain 68                                                        | 5.32E-09 | No  | No  | Yes | No  | No  | Yes | No  |

|        |          |                                                                                     |          |     |     |     |     |     |     |    |
|--------|----------|-------------------------------------------------------------------------------------|----------|-----|-----|-----|-----|-----|-----|----|
| 5530   | PPP3CA   | protein phosphatase 3 (formerly 2B), catalytic subunit, alpha isoform               | 5.37E-09 | Yes | No  | Yes | No  | No  | No  | No |
| 257364 | SNX33    | sorting nexin 33                                                                    | 5.44E-09 | No  | No  | No  | Yes | No  | No  | No |
| 55272  | IMP3     | IMP3, U3 small nucleolar ribonucleoprotein, homolog (yeast)                         | 5.44E-09 | No  | No  | No  | Yes | No  | No  | No |
| 9063   | PIAS2    | protein inhibitor of activated STAT, 2                                              | 5.48E-09 | Yes | No  | No  | Yes | No  | No  | No |
| 285016 | FAM150B  | family with sequence similarity 150, member B                                       | 5.52E-09 | No  | No  | No  | Yes | No  | No  | No |
| 3217   | HOXB7    | homeobox B7                                                                         | 5.57E-09 | No  | No  | Yes | No  | No  | No  | No |
| 34     | ACADM    | acyl-Coenzyme A dehydrogenase, C-4 to C-12 straight chain                           | 5.62E-09 | No  | No  | Yes | No  | No  | No  | No |
| 127124 | ATP6V1G3 | ATPase, H+ transporting, lysosomal 13kDa, V1 subunit G3                             | 5.62E-09 | No  | No  | No  | No  | Yes | No  | No |
| 255488 | RNF144B  | ring finger 144B                                                                    | 5.68E-09 | No  | No  | Yes | No  | No  | No  | No |
| 3187   | HNRNPH1  | heterogeneous nuclear ribonucleoprotein H1 (H)                                      | 5.73E-09 | No  | No  | No  | Yes | No  | No  | No |
| 1995   | ELAVL3   | ELAV (embryonic lethal, abnormal vision, Drosophila)-like 3 (Hu antigen C)          | 5.73E-09 | No  | No  | No  | Yes | No  | No  | No |
| 10575  | CCT4     | chaperonin containing TCP1, subunit 4 (delta)                                       | 5.74E-09 | No  | No  | No  | Yes | No  | No  | No |
| 55167  | MSL2L1   | male-specific lethal 2-like 1 (Drosophila)                                          | 5.81E-09 | No  | No  | Yes | No  | No  | No  | No |
| 1773   | DNASE1   | deoxyribonuclease I                                                                 | 5.85E-09 | No  | Yes | Yes | No  | No  | No  | No |
| 4792   | NFKBIA   | nuclear factor of kappa light polypeptide gene enhancer in B-cells inhibitor, alpha | 5.89E-09 | Yes | No  | No  | Yes | No  | No  | No |
| 3073   | HEXA     | hexosaminidase A (alpha polypeptide)                                                | 6.00E-09 | Yes | No  | No  | No  | Yes | No  | No |
| 7175   | TPR      | translocated promoter region (to activated MET oncogene)                            | 6.04E-09 | No  | No  | Yes | No  | No  | No  | No |
| 80310  | PDGFD    | platelet derived growth factor D                                                    | 6.11E-09 | No  | No  | Yes | No  | No  | No  | No |
| 9846   | GAB2     | GRB2-associated binding protein 2                                                   | 6.11E-09 | Yes | No  | No  | No  | No  | No  | No |
| 79682  | MLF1IP   | MLF1 interacting protein                                                            | 6.15E-09 | No  | No  | Yes | No  | No  | No  | No |
| 94059  | LENG9    | leukocyte receptor cluster (LRC) member 9                                           | 6.15E-09 | No  | No  | No  | Yes | No  | Yes | No |
| 9852   | EPM2AIP1 | EPM2A (taforin) interacting protein 1                                               | 6.17E-09 | No  | No  | Yes | No  | No  | Yes | No |
| 56339  | METTL3   | methyltransferase like 3                                                            | 6.17E-09 | Yes | No  | Yes | No  | No  | Yes | No |
| 84455  | EFCAB7   | EF-hand calcium binding domain 7                                                    | 6.22E-09 | No  | No  | Yes | No  | No  | Yes | No |
| 2313   | FLI1     | Friend leukemia virus integration 1                                                 | 6.27E-09 | Yes | No  | No  | No  | No  | No  | No |
| 10487  | CAP1     | CAP, adenylate cyclase-associated protein 1 (yeast)                                 | 6.27E-09 | No  | No  | Yes | No  | No  | Yes | No |
| 51599  | LSR      | lipolysis stimulated lipoprotein receptor                                           | 6.34E-09 | No  | No  | Yes | No  | No  | No  | No |
| 10861  | SLC26A1  | solute carrier family 26 (sulfate transporter), member 1                            | 6.45E-09 | No  | No  | No  | No  | Yes | No  | No |
| 84878  | ZBTB45   | zinc finger and BTB domain containing 45                                            | 6.74E-09 | No  | No  | No  | Yes | No  | No  | No |
| 4335   | MNT      | MAX binding protein                                                                 | 6.84E-09 | Yes | No  | No  | No  | No  | No  | No |
| 134864 | TAAR1    | trace amine associated receptor 1                                                   | 7.00E-09 | No  | No  | Yes | No  | No  | No  | No |
| 55325  | UFSP2    | UFM1-specific peptidase 2                                                           | 7.02E-09 | No  | No  | No  | Yes | No  | No  | No |
| 23608  | MKRN1    | makorin, ring finger protein, 1                                                     | 7.06E-09 | No  | No  | Yes | No  | No  | No  | No |
| 54407  | SLC38A2  | solute carrier family 38, member 2                                                  | 7.11E-09 | Yes | Yes | No  | Yes | No  | Yes | No |

|        |           |                                                                                                            |          |     |     |     |     |     |     |    |    |
|--------|-----------|------------------------------------------------------------------------------------------------------------|----------|-----|-----|-----|-----|-----|-----|----|----|
| 124997 | WDR81     | WD repeat domain 81                                                                                        | 7.16E-09 | Yes | No  | No  | Yes | No  | No  | No | No |
| 112399 | EGLN3     | egl nine homolog 3 (C. elegans)                                                                            | 7.26E-09 | No  | No  | Yes | No  | No  | No  | No | No |
| 25841  | ABTB2     | ankyrin repeat and BTB (POZ) domain containing 2                                                           | 7.26E-09 | Yes | No  | Yes | No  | No  | Yes | No | No |
| 53635  | PTOV1     | prostate tumor overexpressed gene 1                                                                        | 7.31E-09 | No  | No  | No  | Yes | No  | No  | No | No |
| 9741   | LAPTM4A   | lysosomal-associated protein transmembrane 4 alpha                                                         | 7.38E-09 | Yes | No  | Yes | No  | No  | No  | No | No |
| 374659 | HDDC3     | HD domain containing 3                                                                                     | 7.42E-09 | No  | No  | Yes | No  | No  | No  | No | No |
| 5093   | PCBP1     | poly(rC) binding protein 1                                                                                 | 7.43E-09 | No  | No  | Yes | No  | No  | No  | No | No |
| 7404   | UTY       | ubiquitously transcribed tetratricopeptide repeat gene, Y-linked                                           | 7.44E-09 | No  | No  | Yes | No  | No  | No  | No | No |
| 387790 | LOC387790 | hypothetical LOC387790                                                                                     | 7.44E-09 | Yes | No  | No  | No  | Yes | No  | No | No |
| 5612   | PRKRIR    | protein-kinase, interferon-inducible double stranded RNA dependent inhibitor, repressor of (P58 repressor) | 7.44E-09 | No  | No  | No  | No  | Yes | No  | No | No |
| 4756   | NEO1      | neogenin homolog 1 (chicken)                                                                               | 7.65E-09 | No  | No  | Yes | No  | No  | No  | No | No |
| 8899   | PRPF4B    | PRP4 pre-mRNA processing factor 4 homolog B (yeast)                                                        | 7.66E-09 | No  | No  | No  | No  | Yes | No  | No | No |
| 6789   | STK4      | serine/threonine kinase 4                                                                                  | 7.67E-09 | Yes | No  | Yes | No  | No  | No  | No | No |
| 91754  | NEK9      | NIMA (never in mitosis gene a)- related kinase 9                                                           | 7.67E-09 | No  | No  | Yes | No  | No  | No  | No | No |
| 85397  | RGS8      | regulator of G-protein signaling 8                                                                         | 7.70E-09 | No  | No  | No  | Yes | No  | No  | No | No |
| 28976  | ACAD9     | acyl-Coenzyme A dehydrogenase family, member 9                                                             | 7.70E-09 | Yes | No  | Yes | No  | No  | No  | No | No |
| 55567  | DNAH3     | dynein, axonemal, heavy chain 3                                                                            | 7.79E-09 | No  | No  | No  | Yes | No  | No  | No | No |
| 8675   | STX16     | syntaxin 16                                                                                                | 7.83E-09 | No  | No  | Yes | No  | No  | No  | No | No |
| 11010  | GLIPR1    | GLI pathogenesis-related 1 (glioma)                                                                        | 7.83E-09 | Yes | No  | No  | No  | Yes | No  | No | No |
| 130940 | CCDC148   | coiled-coil domain containing 148                                                                          | 7.94E-09 | No  | No  | Yes | No  | No  | No  | No | No |
| 5336   | PLCG2     | phospholipase C, gamma 2 (phosphatidylinositol-specific)                                                   | 8.06E-09 | No  | No  | Yes | No  | No  | No  | No | No |
| 3148   | HMGB2     | high-mobility group box 2                                                                                  | 8.07E-09 | No  | No  | No  | Yes | No  | No  | No | No |
| 137695 | TMEM68    | transmembrane protein 68                                                                                   | 8.09E-09 | No  | No  | Yes | No  | No  | Yes | No | No |
| 55669  | MFN1      | mitofusin 1                                                                                                | 8.14E-09 | No  | No  | Yes | No  | No  | No  | No | No |
| 1152   | CKB       | creatine kinase, brain                                                                                     | 8.14E-09 | No  | No  | No  | No  | No  | No  | No | No |
| 23394  | ADNP      | activity-dependent neuroprotector homeobox                                                                 | 8.18E-09 | No  | No  | No  | Yes | No  | No  | No | No |
| 57609  | DIP2B     | DIP2 disco-interacting protein 2 homolog B (Drosophila)                                                    | 8.19E-09 | Yes | Yes | Yes | No  | No  | No  | No | No |
| 388732 | C1orf132  | chromosome 1 open reading frame 132                                                                        | 8.20E-09 | NA  | No  | Yes | No  | No  | No  | No | No |
| 58505  | DC2       | DC2 protein                                                                                                | 8.31E-09 | No  | No  | Yes | No  | No  | No  | No | No |
| 51684  | SUFU      | suppressor of fused homolog (Drosophila)                                                                   | 8.34E-09 | Yes | No  | Yes | No  | No  | Yes | No | No |
| 10121  | ACTR1A    | ARP1 actin-related protein 1 homolog A, contractin alpha (yeast)                                           | 8.34E-09 | No  | No  | Yes | No  | No  | Yes | No | No |
| 150538 | FLJ32063  | hypothetical protein LOC150538                                                                             | 8.54E-09 | NA  | No  | Yes | No  | No  | No  | No | No |
| 9487   | PIGL      | phosphatidylinositol glycan anchor biosynthesis, class L                                                   | 8.64E-09 | No  | No  | Yes | No  | No  | No  | No | No |
| 9611   | NCOR1     | nuclear receptor co-repressor 1                                                                            | 8.64E-09 | No  | No  | Yes | No  | No  | No  | No | No |



|        |           |                                                                                                           |          |     |     |     |     |     |     |    |
|--------|-----------|-----------------------------------------------------------------------------------------------------------|----------|-----|-----|-----|-----|-----|-----|----|
| 5534   | PPP3R1    | protein phosphatase 3 (formerly 2B), regulatory subunit B, alpha isoform                                  | 1.09E-08 | Yes | No  | Yes | No  | No  | Yes | No |
| 5925   | RB1       | retinoblastoma 1 (including osteosarcoma)                                                                 | 1.09E-08 | No  | No  | No  | Yes | No  | No  | No |
| 8801   | SUCLG2    | succinate-CoA ligase, GDP-forming, beta subunit                                                           | 1.11E-08 | Yes | Yes | Yes | No  | No  | No  | No |
| 55892  | MYNN      | myoneurin                                                                                                 | 1.12E-08 | No  | No  | No  | Yes | No  | Yes | No |
| 84517  | ARPM1     | actin related protein M1                                                                                  | 1.12E-08 | No  | No  | Yes | No  | No  | Yes | No |
| 9426   | CDY2A     | chromodomain protein, Y-linked, 2A                                                                        | 1.12E-08 | NA  | No  | Yes | No  | No  | No  | No |
| 6713   | SQLE      | squalene epoxidase                                                                                        | 1.14E-08 | No  | No  | Yes | No  | No  | No  | No |
| 23111  | SPG20     | spastic paraplegia 20 (Troyer syndrome)                                                                   | 1.14E-08 | Yes | No  | Yes | No  | No  | No  | No |
| 10112  | KIF20A    | kinesin family member 20A                                                                                 | 1.15E-08 | No  | No  | Yes | No  | No  | Yes | No |
| 6830   | SUPT6H    | suppressor of Ty 6 homolog (S. cerevisiae)                                                                | 1.16E-08 | No  | No  | Yes | No  | No  | Yes | No |
| 3592   | IL12A     | interleukin 12A (natural killer cell stimulatory factor 1, cytotoxic lymphocyte maturation factor 1, p35) | 1.16E-08 | No  | No  | Yes | No  | No  | No  | No |
| 29940  | DSE       | dermatan sulfate epimerase                                                                                | 1.19E-08 | Yes | Yes | Yes | No  | No  | No  | No |
| 9342   | SNAP29    | synaptosomal-associated protein, 29kDa                                                                    | 1.19E-08 | No  | No  | Yes | No  | No  | No  | No |
| 8773   | SNAP23    | synaptosomal-associated protein, 23kDa                                                                    | 1.19E-08 | No  | Yes | No  | Yes | No  | No  | No |
| 9868   | TOMM70A   | translocase of outer mitochondrial membrane 70 homolog A (S. cerevisiae)                                  | 1.21E-08 | No  | Yes | Yes | No  | No  | No  | No |
| 3667   | IRS1      | insulin receptor substrate 1                                                                              | 1.22E-08 | No  | No  | Yes | No  | No  | No  | No |
| 51321  | AMZ2      | archaealysin family metalloproteinase 2                                                                   | 1.23E-08 | No  | No  | Yes | No  | No  | No  | No |
| 120939 | C12orf59  | chromosome 12 open reading frame 59                                                                       | 1.24E-08 | No  | No  | Yes | No  | No  | No  | No |
| 253943 | YTHDF3    | YTH domain family, member 3                                                                               | 1.24E-08 | No  | No  | Yes | No  | No  | No  | No |
| 387496 | RASL11A   | RAS-like, family 11, member A                                                                             | 1.26E-08 | No  | No  | Yes | No  | No  | No  | No |
| 64975  | MRPL41    | mitochondrial ribosomal protein L41                                                                       | 1.27E-08 | No  | No  | Yes | No  | No  | No  | No |
| 5771   | PTPN2     | protein tyrosine phosphatase, non-receptor type 2                                                         | 1.28E-08 | Yes | No  | Yes | No  | No  | No  | No |
| 644    | BLVRA     | biliverdin reductase A                                                                                    | 1.28E-08 | Yes | No  | No  | Yes | No  | No  | No |
| 3181   | HNRNPA2B1 | heterogeneous nuclear ribonucleoprotein A2/B1                                                             | 1.28E-08 | No  | No  | Yes | No  | No  | Yes | No |
| 9948   | WDR1      | WD repeat domain 1                                                                                        | 1.30E-08 | No  | No  | Yes | No  | No  | Yes | No |
| 7707   | ZNF148    | zinc finger protein 148                                                                                   | 1.30E-08 | No  | No  | No  | Yes | No  | No  | No |
| 84750  | FUT10     | fucosyltransferase 10 (alpha (1,3) fucosyltransferase)                                                    | 1.30E-08 | No  | No  | No  | Yes | No  | No  | No |
| 284348 | LYPD5     | LY6/PLAUR domain containing 5                                                                             | 1.33E-08 | No  | No  | No  | No  | Yes | No  | No |
| 337867 | UBAC2     | UBA domain containing 2                                                                                   | 1.34E-08 | Yes | No  | No  | No  | Yes | No  | No |
| 6285   | S100B     | S100 calcium binding protein B                                                                            | 1.35E-08 | Yes | No  | Yes | No  | No  | No  | No |
| 6903   | TBCC      | tubulin folding cofactor C                                                                                | 1.36E-08 | No  | No  | No  | Yes | No  | No  | No |
| 10902  | BRD8      | bromodomain containing 8                                                                                  | 1.37E-08 | No  | No  | No  | Yes | No  | Yes | No |
| 55781  | RIOK2     | RIO kinase 2 (yeast)                                                                                      | 1.37E-08 | No  | No  | Yes | No  | No  | No  | No |
| 1318   | SLC31A2   | solute carrier family 31 (copper transporters), member 2                                                  | 1.37E-08 | Yes | No  | Yes | No  | No  | No  | No |

|        |           |                                                                                                      |          |     |     |     |     |     |     |     |
|--------|-----------|------------------------------------------------------------------------------------------------------|----------|-----|-----|-----|-----|-----|-----|-----|
| 4089   | SMAD4     | SMAD family member 4                                                                                 | 1.38E-08 | No  | No  | Yes | No  | No  | Yes | No  |
| 6890   | TAP1      | transporter 1, ATP-binding cassette, sub-family B (MDR/TAP)                                          | 1.39E-08 | Yes | No  | Yes | No  | No  | Yes | Yes |
| 55830  | GLT8D1    | glycosyltransferase 8 domain containing 1                                                            | 1.39E-08 | Yes | Yes | Yes | No  | No  | No  | No  |
| 5017   | OVOL1     | ovo-like 1 (Drosophila)                                                                              | 1.41E-08 | No  | No  | No  | Yes | No  | No  | No  |
| 79759  | ZNF668    | zinc finger protein 668                                                                              | 1.41E-08 | Yes | No  | No  | Yes | No  | No  | No  |
| 27189  | IL17C     | interleukin 17C                                                                                      | 1.41E-08 | No  | No  | No  | Yes | No  | No  | No  |
| 64343  | AZI2      | 5-azacytidine induced 2                                                                              | 1.42E-08 | No  | No  | No  | Yes | No  | Yes | No  |
| 56033  | BARX1     | BARX homeobox 1                                                                                      | 1.44E-08 | No  |
| 5701   | PSMC2     | proteasome (prosome, macropain) 26S subunit, ATPase, 2                                               | 1.45E-08 | No  | No  | Yes | No  | No  | Yes | No  |
| 122742 | OR4L1     | olfactory receptor, family 4, subfamily L, member 1                                                  | 1.46E-08 | NA  | No  | No  | Yes | No  | No  | No  |
| 26269  | FBX08     | F-box protein 8                                                                                      | 1.46E-08 | No  | No  | Yes | No  | No  | Yes | No  |
| 388591 | RNF207    | ring finger protein 207                                                                              | 1.51E-08 | No  | No  | No  | Yes | No  | No  | No  |
| 10283  | SDCCAG10  | serologically defined colon cancer antigen 10                                                        | 1.53E-08 | Yes | No  | Yes | No  | No  | No  | No  |
| 285672 | SFRS12IP1 | SFRS12-interacting protein 1                                                                         | 1.53E-08 | No  | No  | Yes | No  | No  | No  | No  |
| 10654  | PMVK      | phosphomevalonate kinase                                                                             | 1.53E-08 | No  | No  | Yes | No  | No  | No  | No  |
| 10606  | PAICS     | phosphoribosylaminoimidazole carboxylase, phosphoribosylaminoimidazole succinocarboxamide synthetase | 1.53E-08 | No  | No  | No  | Yes | No  | No  | No  |
| 16     | AARS      | alanyl-tRNA synthetase                                                                               | 1.58E-08 | No  | No  | Yes | No  | No  | No  | No  |
| 11269  | DDX19B    | DEAD (Asp-Glu-Ala-As) box polypeptide 19B                                                            | 1.58E-08 | No  | No  | Yes | No  | No  | No  | No  |
| 29887  | SNX10     | sorting nexin 10                                                                                     | 1.58E-08 | No  | No  | Yes | No  | No  | No  | No  |
| 27044  | SND1      | staphylococcal nuclease and tudor domain containing 1                                                | 1.59E-08 | Yes | No  | No  | No  | Yes | No  | No  |
| 7874   | USP7      | ubiquitin specific peptidase 7 (herpes virus-associated)                                             | 1.60E-08 | No  | No  | Yes | No  | No  | No  | No  |
| 841    | CASP8     | caspase 8, apoptosis-related cysteine peptidase                                                      | 1.60E-08 | Yes | No  | Yes | No  | No  | Yes | Yes |
| 27309  | ZNF330    | zinc finger protein 330                                                                              | 1.61E-08 | No  | No  | Yes | No  | No  | No  | No  |
| 201562 | PTPLB     | protein tyrosine phosphatase-like (proline instead of catalytic arginine), member b                  | 1.61E-08 | No  | No  | Yes | No  | No  | Yes | No  |
| 389206 | CCDC4     | coiled-coil domain containing 4                                                                      | 1.63E-08 | Yes | No  | Yes | No  | No  | No  | No  |
| 1031   | CDKN2C    | cyclin-dependent kinase inhibitor 2C (p18, inhibits CDK4)                                            | 1.63E-08 | No  | No  | Yes | No  | No  | No  | No  |
| 6732   | SRPK1     | SFRS protein kinase 1                                                                                | 1.63E-08 | No  | No  | Yes | No  | No  | No  | No  |
| 7378   | UPP1      | uridine phosphorylase 1                                                                              | 1.64E-08 | Yes | No  | Yes | No  | No  | No  | No  |
| 51312  | SLC25A37  | solute carrier family 25, member 37                                                                  | 1.64E-08 | No  | No  | Yes | No  | No  | No  | No  |
| 11103  | KRR1      | KRR1, small subunit (SSU) processome component, homolog (yeast)                                      | 1.65E-08 | Yes | No  | Yes | No  | No  | No  | No  |
| 3833   | KIFC1     | kinesin family member C1                                                                             | 1.65E-08 | No  | No  | Yes | No  | No  | No  | No  |
| 493869 | GPX8      | glutathione peroxidase 8                                                                             | 1.67E-08 | No  | No  | No  | Yes | No  | No  | No  |
| 6603   | SMARCD2   | SWI/SNF related, matrix associated, actin dependent regulator of chromatin, subfamily d, member 2    | 1.68E-08 | No  | No  | No  | Yes | No  | No  | No  |
| 81565  | NDEL1     | nudE nuclear distribution gene E homolog (A. nidulans)-like 1                                        | 1.71E-08 | Yes | No  | Yes | No  | No  | No  | No  |

|        |          |                                                                                         |          |     |     |     |     |     |     |     |
|--------|----------|-----------------------------------------------------------------------------------------|----------|-----|-----|-----|-----|-----|-----|-----|
| 115704 | EV15L    | ecotropic viral integration site 5-like                                                 | 1.72E-08 | No  | No  | No  | No  | Yes | Yes | No  |
| 130026 | ICA1L    | islet cell autoantigen 1,69kDa-like                                                     | 1.74E-08 | No  | No  | Yes | No  | No  | No  | No  |
| 130162 | C2orf63  | chromosome 2 open reading frame 63                                                      | 1.77E-08 | No  | Yes | No  | Yes | No  | No  | No  |
| 2773   | GNAI3    | guanine nucleotide binding protein (G protein), alpha inhibiting activity polypeptide 3 | 1.77E-08 | No  | No  | No  | No  | Yes | No  | No  |
| 256586 | LYSMD2   | LysM, putative peptidoglycan-binding, domain containing 2                               | 1.77E-08 | No  |
| 55013  | CCDC109B | coiled-coil domain containing 109B                                                      | 1.78E-08 | No  | No  | Yes | No  | No  | No  | No  |
| 5101   | PCDH9    | protocadherin 9                                                                         | 1.78E-08 | Yes | No  | Yes | No  | No  | Yes | Yes |
| 11326  | VSIG4    | V-set and immunoglobulin domain containing 4                                            | 1.79E-08 | No  | No  | No  | Yes | No  | No  | No  |
| 4835   | NQO2     | NAD(P)H dehydrogenase, quinone 2                                                        | 1.79E-08 | No  | No  | No  | Yes | No  | Yes | No  |
| 10434  | LYPLA1   | lysophospholipase 1                                                                     | 1.80E-08 | No  | No  | Yes | No  | No  | No  | No  |
| 1984   | EIF5A    | eukaryotic translation initiation factor 5A                                             | 1.81E-08 | Yes | No  | Yes | No  | No  | No  | No  |
| 54880  | BCOR     | BCL6 co-repressor                                                                       | 1.84E-08 | No  | No  | Yes | No  | No  | No  | No  |
| 7328   | UBE2H    | ubiquitin-conjugating enzyme E2H (UBC8 homolog, yeast)                                  | 1.84E-08 | Yes | No  | Yes | No  | No  | No  | No  |
| 84062  | DTNBP1   | dystrobrevin binding protein 1                                                          | 1.86E-08 | Yes | No  | No  | Yes | No  | No  | No  |
| 10254  | STAM2    | signal transducing adaptor molecule (SH3 domain and ITAM motif) 2                       | 1.86E-08 | No  | No  | Yes | No  | No  | Yes | No  |
| 51566  | ARMCX3   | armadillo repeat containing, X-linked 3                                                 | 1.90E-08 | Yes | No  | No  | Yes | No  | No  | No  |
| 54470  | ARMCX6   | armadillo repeat containing, X-linked 6                                                 | 1.90E-08 | No  | No  | No  | Yes | No  | No  | No  |
| 3981   | LIG4     | ligase IV, DNA, ATP-dependent                                                           | 1.90E-08 | No  | No  | Yes | No  | No  | No  | No  |
| 7763   | ZFAND5   | zinc finger, AN1-type domain 5                                                          | 1.91E-08 | No  | No  | Yes | No  | No  | Yes | No  |
| 27067  | STAU2    | staufen, RNA binding protein, homolog 2 (Drosophila)                                    | 1.92E-08 | No  | No  | Yes | No  | No  | No  | No  |
| 10659  | CUGBP2   | CUG triplet repeat, RNA binding protein 2                                               | 1.93E-08 | Yes | Yes | Yes | No  | No  | No  | No  |
| 81611  | ANP32E   | acidic (leucine-rich) nuclear phosphoprotein 32 family, member E                        | 1.94E-08 | No  | No  | Yes | No  | No  | No  | No  |
| 5533   | PPP3CC   | protein phosphatase 3 (formerly 2B), catalytic subunit, gamma isoform                   | 1.98E-08 | No  | No  | Yes | No  | No  | No  | No  |
| 6038   | RNASE4   | ribonuclease, RNase A family, 4                                                         | 1.98E-08 | Yes | No  | No  | Yes | No  | Yes | No  |
| 6929   | TCF3     | transcription factor 3 (E2A immunoglobulin enhancer binding factors E12/E47)            | 1.98E-08 | No  | No  | No  | Yes | No  | No  | No  |
| 5991   | RFX3     | regulatory factor X, 3 (influences HLA class II expression)                             | 1.99E-08 | No  | No  | Yes | No  | No  | Yes | No  |
| 23338  | PHF15    | PHD finger protein 15                                                                   | 2.00E-08 | No  | No  | Yes | No  | No  | No  | No  |
| 5281   | PIGF     | phosphatidylinositol glycan anchor biosynthesis, class F                                | 2.01E-08 | No  | No  | Yes | No  | No  | Yes | No  |
| 115861 | NXNL1    | nucleoredoxin-like 1                                                                    | 2.01E-08 | Yes | No  | No  | Yes | No  | No  | No  |
| 376497 | SLC27A1  | solute carrier family 27 (fatty acid transporter), member 1                             | 2.01E-08 | No  | No  | No  | Yes | No  | No  | No  |
| 7832   | BTG2     | BTG family, member 2                                                                    | 2.01E-08 | No  | No  | Yes | No  | No  | Yes | Yes |
| 9175   | MAP3K13  | mitogen-activated protein kinase kinase kinase 13                                       | 2.01E-08 | Yes | No  | Yes | No  | No  | No  | No  |
| 54469  | ZFAND6   | zinc finger, AN1-type domain 6                                                          | 2.06E-08 | NA* | Yes | Yes | No  | No  | No  | No  |
| 84674  | CARD6    | caspase recruitment domain family, member 6                                             | 2.07E-08 | Yes | No  | No  | Yes | No  | No  | No  |

|        |         |                                                                                                                                     |          |     |     |     |     |     |     |     |
|--------|---------|-------------------------------------------------------------------------------------------------------------------------------------|----------|-----|-----|-----|-----|-----|-----|-----|
| 6167   | RPL37   | ribosomal protein L37                                                                                                               | 2.07E-08 | No  | No  | No  | Yes | No  | Yes | No  |
| 200576 | PIP5K3  | phosphatidylinositol-3-phosphate/phosphatidylinositol 5-kinase, type III                                                            | 2.07E-08 | Yes | No  | No  | No  | Yes | No  | No  |
| 51081  | MRPS7   | mitochondrial ribosomal protein S7                                                                                                  | 2.07E-08 | No  | No  | No  | No  | Yes | No  | No  |
| 2194   | FASN    | fatty acid synthase                                                                                                                 | 2.07E-08 | No  |
| 7518   | XRCC4   | X-ray repair complementing defective repair in Chinese hamster cells 4                                                              | 2.08E-08 | No  | No  | Yes | No  | No  | No  | No  |
| 5567   | PRKACB  | protein kinase, cAMP-dependent, catalytic, beta                                                                                     | 2.09E-08 | Yes | No  | No  | Yes | No  | No  | No  |
| 259307 | IL4I1   | interleukin 4 induced 1                                                                                                             | 2.09E-08 | No  | No  | No  | Yes | No  | No  | No  |
| 63895  | FAM38B  | family with sequence similarity 38, member B                                                                                        | 2.13E-08 | No  | No  | Yes | No  | No  | No  | No  |
| 4739   | NEDD9   | neural precursor cell expressed, developmentally down-regulated 9                                                                   | 2.13E-08 | Yes | No  | Yes | No  | No  | No  | No  |
| 84932  | RAB2B   | RAB2B, member RAS oncogene family                                                                                                   | 2.14E-08 | Yes | No  | No  | Yes | No  | No  | No  |
| 9976   | CLEC2B  | C-type lectin domain family 2, member B                                                                                             | 2.14E-08 | Yes | No  | Yes | No  | No  | No  | No  |
| 154791 | C7orf55 | chromosome 7 open reading frame 55                                                                                                  | 2.15E-08 | No  | No  | No  | No  | Yes | Yes | No  |
| 26261  | FBXO24  | F-box protein 24                                                                                                                    | 2.17E-08 | No  | No  | Yes | No  | No  | No  | No  |
| 80155  | NARG1   | NMDA receptor regulated 1                                                                                                           | 2.17E-08 | Yes | Yes | Yes | No  | No  | Yes | No  |
| 4717   | NDUFC1  | NADH dehydrogenase (ubiquinone) 1, subcomplex unknown, 1, 6kDa                                                                      | 2.17E-08 | No  | No  | Yes | No  | No  | No  | No  |
| 2071   | ERCC3   | excision repair cross-complementing rodent repair deficiency, complementation group 3 (xeroderma pigmentosum group B complementing) | 2.17E-08 | No  | No  | Yes | No  | No  | No  | No  |
| 10717  | AP4B1   | adaptor-related protein complex 4, beta 1 subunit                                                                                   | 2.17E-08 | Yes | No  | No  | Yes | No  | No  | No  |
| 6458   | DCLRE1B | DNA cross-link repair 1B (PSO2 homolog, S. cerevisiae)                                                                              | 2.17E-08 | No  | No  | Yes | No  | No  | No  | No  |
| 51305  | KCNK9   | potassium channel, subfamily K, member 9                                                                                            | 2.18E-08 | No  | Yes | Yes | No  | No  | No  | No  |
| 374966 | FAM73A  | family with sequence similarity 73, member A                                                                                        | 2.20E-08 | Yes | No  | No  | No  | No  | No  | No  |
| 83460  | TMEM93  | transmembrane protein 93                                                                                                            | 2.22E-08 | No  | No  | Yes | No  | No  | No  | No  |
| 6059   | ABCE1   | ATP-binding cassette, sub-family E (OABP), member 1                                                                                 | 2.22E-08 | No  | No  | Yes | No  | No  | Yes | No  |
| 1871   | E2F3    | E2F transcription factor 3                                                                                                          | 2.30E-08 | No  | No  | Yes | No  | No  | No  | No  |
| 7538   | ZFP36   | zinc finger protein 36, C3H type, homolog (mouse)                                                                                   | 2.30E-08 | Yes | No  | No  | Yes | No  | Yes | Yes |
| 1521   | CTSW    | cathepsin W                                                                                                                         | 2.31E-08 | Yes | No  | Yes | No  | No  | No  | No  |
| 27289  | RND1    | Rho family GTPase 1                                                                                                                 | 2.31E-08 | No  |
| 23143  | LRCH1   | leucine-rich repeats and calponin homology (CH) domain containing 1                                                                 | 2.32E-08 | No  | No  | Yes | No  | No  | No  | No  |
| 204851 | HIPK1   | homeodomain interacting protein kinase 1                                                                                            | 2.37E-08 | No  | No  | No  | Yes | No  | Yes | No  |
| 7776   | ZNF236  | zinc finger protein 236                                                                                                             | 2.37E-08 | No  | No  | Yes | No  | No  | Yes | No  |
| 28981  | IFT81   | intraflagellar transport 81 homolog (Chlamydomonas)                                                                                 | 2.37E-08 | No  | No  | Yes | No  | No  | No  | No  |
| 51134  | CCDC41  | coiled-coil domain containing 41                                                                                                    | 2.37E-08 | Yes | No  | Yes | No  | No  | No  | No  |
| 441608 | OR5B3   | olfactory receptor, family 5, subfamily B, member 3                                                                                 | 2.38E-08 | NA  | No  | No  | Yes | No  | No  | No  |
| 338811 | FAM19A2 | family with sequence similarity 19 (chemokine (C-C motif)-like), member A2                                                          | 2.43E-08 | No  |
| 3609   | ILF3    | interleukin enhancer binding factor 3, 90kDa                                                                                        | 2.43E-08 | No  | No  | Yes | No  | No  | Yes | No  |



|        |          |                                                                                                                                                            |          |     |    |     |     |     |     |     |
|--------|----------|------------------------------------------------------------------------------------------------------------------------------------------------------------|----------|-----|----|-----|-----|-----|-----|-----|
| 154881 | KCTD7    | potassium channel tetramerisation domain containing 7                                                                                                      | 2.45E-08 | No  | No | Yes | No  | No  | No  | No  |
| 286530 | P2RY8    | purinergic receptor P2Y, G-protein coupled, 8                                                                                                              | 2.46E-08 | No  | No | Yes | No  | No  | Yes | No  |
| 285704 | RGMB     | RGM domain family, member B                                                                                                                                | 2.48E-08 | Yes | No | Yes | No  | No  | No  | No  |
| 2073   | ERCC5    | excision repair cross-complementing rodent repair deficiency, complementation group 5 (xeroderma pigmentosum, complementation group G (Cockayne syndrome)) | 2.49E-08 | Yes | No | No  | No  | Yes | Yes | Yes |
| 2517   | FUCA1    | fucosidase, alpha-L-1, tissue                                                                                                                              | 2.49E-08 | No  | No | Yes | No  | No  | No  | No  |
| 163049 | ZNF791   | zinc finger protein 791                                                                                                                                    | 2.51E-08 | Yes | No | Yes | No  | No  | No  | No  |
| 57194  | ATP10A   | ATPase, class V, type 10A                                                                                                                                  | 2.53E-08 | Yes | No | No  | No  | No  | No  | No  |
| 6632   | SNRPD1   | small nuclear ribonucleoprotein D1 polypeptide 16kDa                                                                                                       | 2.56E-08 | No  | No | Yes | No  | No  | No  | No  |
| 4255   | MGMT     | O-6-methylguanine-DNA methyltransferase                                                                                                                    | 2.56E-08 | No  | No | Yes | No  | No  | No  | No  |
| 92856  | IMP4     | IMP4, U3 small nucleolar ribonucleoprotein, homolog (yeast)                                                                                                | 2.61E-08 | No  | No | Yes | No  | No  | Yes | No  |
| 84317  | CDC115   | coiled-coil domain containing 115                                                                                                                          | 2.61E-08 | No  | No | Yes | No  | No  | No  | No  |
| 170392 | OIT3     | oncprotein induced transcript 3                                                                                                                            | 2.62E-08 | No  | No | Yes | No  | No  | No  | No  |
| 4121   | MAN1A1   | mannosidase, alpha, class 1A, member 1                                                                                                                     | 2.62E-08 | No  | No | Yes | No  | No  | No  | No  |
| 5695   | PSMB7    | proteasome (prosome, macropain) subunit, beta type, 7                                                                                                      | 2.63E-08 | No  | No | No  | Yes | No  | No  | No  |
| 10788  | IQGAP2   | IQ motif containing GTPase activating protein 2                                                                                                            | 2.64E-08 | Yes | No | Yes | No  | No  | Yes | Yes |
| 55350  | VNN3     | vanin 3                                                                                                                                                    | 2.66E-08 | No  | No | No  | Yes | No  | No  | No  |
| 353322 | ANKRD37  | ankyrin repeat domain 37                                                                                                                                   | 2.66E-08 | No  | No | Yes | No  | No  | No  | No  |
| 56160  | NDNL2    | necdin-like 2                                                                                                                                              | 2.67E-08 | No  | No | Yes | No  | No  | Yes | No  |
| 57223  | SMEK2    | SMEK homolog 2, suppressor of mek1 (Dictyostelium)                                                                                                         | 2.67E-08 | No  | No | Yes | No  | No  | Yes | No  |
| 124044 | SPATA2L  | spermatogenesis associated 2-like                                                                                                                          | 2.67E-08 | No  | No | No  | No  | No  | No  | No  |
| 55216  | C11orf57 | chromosome 11 open reading frame 57                                                                                                                        | 2.69E-08 | No  | No | Yes | No  | No  | Yes | No  |
| 9897   | KIAA0196 | KIAA0196                                                                                                                                                   | 2.69E-08 | No  | No | Yes | No  | No  | No  | No  |
| 1965   | EIF2S1   | eukaryotic translation initiation factor 2, subunit 1 alpha, 35kDa                                                                                         | 2.70E-08 | No  | No | Yes | No  | No  | No  | No  |
| 5818   | PVRL1    | poliovirus receptor-related 1 (herpesvirus entry mediator C)                                                                                               | 2.71E-08 | Yes | No | No  | No  | No  | No  | No  |
| 81831  | NETO2    | neuropilin (NRP) and tolloid (TLL)-like 2                                                                                                                  | 2.71E-08 | No  | No | Yes | No  | No  | No  | No  |
| 415116 | PIM3     | pim-3 oncogene                                                                                                                                             | 2.71E-08 | No  | No | No  | No  | No  | No  | No  |
| 148789 | B3GALNT2 | beta-1,3-N-acetylgalactosaminyltransferase 2                                                                                                               | 2.73E-08 | NA  | No | Yes | No  | No  | No  | No  |
| 23351  | KIAA0323 | KIAA0323                                                                                                                                                   | 2.73E-08 | No  | No | No  | Yes | No  | No  | No  |
| 84301  | DDI2     | DDI1, DNA-damage inducible 1, homolog 2 (S. cerevisiae)                                                                                                    | 2.74E-08 | No  | No | Yes | No  | No  | No  | No  |
| 4801   | NFYB     | nuclear transcription factor Y, beta                                                                                                                       | 2.74E-08 | No  | No | Yes | No  | No  | No  | No  |
| 27243  | CHMP2A   | chromatin modifying protein 2A                                                                                                                             | 2.76E-08 | No  | No | Yes | No  | No  | No  | No  |
| 1497   | CTNS     | cystinosis, nephropathic                                                                                                                                   | 2.78E-08 | Yes | No | No  | No  | No  | No  | No  |
| 55789  | DEPDC1B  | DEP domain containing 1B                                                                                                                                   | 2.79E-08 | No  | No | Yes | No  | No  | No  | No  |
| 9860   | LRIG2    | leucine-rich repeats and immunoglobulin-like domains 2                                                                                                     | 2.80E-08 | Yes | No | Yes | No  | No  | No  | No  |

|        |           |                                                                                                     |          |     |     |     |     |    |     |     |
|--------|-----------|-----------------------------------------------------------------------------------------------------|----------|-----|-----|-----|-----|----|-----|-----|
| 196513 | DCP1B     | DCP1 decapping enzyme homolog B ( <i>S. cerevisiae</i> )                                            | 2.81E-08 | No  | No  | No  | Yes | No | No  | No  |
| 22985  | ACIN1     | apoptotic chromatin condensation inducer 1                                                          | 2.84E-08 | Yes | No  | No  | Yes | No | Yes | Yes |
| 1316   | KLF6      | Kruppel-like factor 6                                                                               | 2.85E-08 | Yes | No  | Yes | No  | No | Yes | No  |
| 10239  | AP3S2     | adaptor-related protein complex 3, sigma 2 subunit                                                  | 2.92E-08 | No  | No  | Yes | No  | No | No  | No  |
| 1975   | EIF4B     | eukaryotic translation initiation factor 4B                                                         | 2.94E-08 | No  | No  | Yes | No  | No | No  | No  |
| 8398   | PLA2G6    | phospholipase A2, group VI (cytosolic, calcium-independent)                                         | 2.95E-08 | No  | No  | Yes | No  | No | No  | No  |
| 54602  | NDFIP2    | Nedd4 family interacting protein 2                                                                  | 2.96E-08 | No  | No  | No  | Yes | No | No  | No  |
| 10056  | FARSB     | phenylalanyl-tRNA synthetase, beta subunit                                                          | 3.00E-08 | Yes | No  | Yes | No  | No | No  | No  |
| 10160  | FARP1     | FERM, RhoGEF (ARHGEF) and pleckstrin domain protein 1 (chondrocyte-derived)                         | 3.01E-08 | No  | Yes | Yes | No  | No | No  | No  |
| 9938   | ARHGAP25  | Rho GTPase activating protein 25                                                                    | 3.04E-08 | Yes | No  | No  | Yes | No | No  | No  |
| 23523  | CABIN1    | calcineurin binding protein 1                                                                       | 3.05E-08 | Yes | No  | Yes | No  | No | Yes | Yes |
| 56929  | FEM1C     | fem-1 homolog c ( <i>C. elegans</i> )                                                               | 3.06E-08 | No  | No  | Yes | No  | No | No  | No  |
| 9360   | PPIG      | peptidylprolyl isomerase G (cyclophilin G)                                                          | 3.06E-08 | Yes | No  | Yes | No  | No | Yes | Yes |
| 8802   | SUCLG1    | succinate-CoA ligase, alpha subunit                                                                 | 3.06E-08 | No  | No  | Yes | No  | No | Yes | No  |
| 84216  | TMEM117   | transmembrane protein 117                                                                           | 3.06E-08 | No  | No  | Yes | No  | No | No  | No  |
| 3310   | HSPA6     | heat shock 70kDa protein 6 (HSP70B)                                                                 | 3.11E-08 | Yes | Yes | Yes | No  | No | No  | No  |
| 3448   | IFNA14    | interferon, alpha 14                                                                                | 3.13E-08 | NA  | No  | Yes | No  | No | No  | No  |
| 136259 | KLF14     | Kruppel-like factor 14                                                                              | 3.14E-08 | No  | No  | Yes | No  | No | No  | No  |
| 6599   | SMARCC1   | SWI/SNF related, matrix associated, actin dependent regulator of chromatin, subfamily c, member 1   | 3.14E-08 | No  | No  | Yes | No  | No | No  | No  |
| 6660   | SOX5      | SRY (sex determining region Y)-box 5                                                                | 3.15E-08 | No  | No  | No  | Yes | No | Yes | No  |
| 8682   | PEA15     | phosphoprotein enriched in astrocytes 15                                                            | 3.17E-08 | Yes | No  | Yes | No  | No | No  | No  |
| 8331   | HIST1H2AJ | histone cluster 1, H2aj                                                                             | 3.17E-08 | NA  | No  | Yes | No  | No | No  | No  |
| 54908  | CCDC99    | coiled-coil domain containing 99                                                                    | 3.20E-08 | No  | No  | No  | Yes | No | Yes | No  |
| 149647 | FAM71A    | family with sequence similarity 71, member A                                                        | 3.21E-08 | No  | No  | No  | Yes | No | No  | No  |
| 1836   | SLC26A2   | solute carrier family 26 (sulfate transporter), member 2                                            | 3.21E-08 | Yes | No  | No  | Yes | No | Yes | No  |
| 10987  | COP55     | COP9 constitutive photomorphogenic homolog subunit 5 ( <i>Arabidopsis</i> )                         | 3.23E-08 | No  | No  | Yes | No  | No | Yes | No  |
| 22807  | IKZF2     | IKAROS family zinc finger 2 (Helios)                                                                | 3.25E-08 | Yes | No  | Yes | No  | No | No  | No  |
| 9589   | WTAP      | Wilms tumor 1 associated protein                                                                    | 3.25E-08 | Yes | No  | Yes | No  | No | Yes | No  |
| 27074  | LAMP3     | lysosomal-associated membrane protein 3                                                             | 3.26E-08 | No  | No  | Yes | No  | No | No  | No  |
| 6610   | STX4      | syntaxin 4                                                                                          | 3.28E-08 | Yes | No  | No  | Yes | No | No  | No  |
| 2248   | FGF3      | fibroblast growth factor 3 (murine mammary tumor virus integration site (v-int-2) oncogene homolog) | 3.32E-08 | No  | No  | No  | Yes | No | No  | No  |
| 9726   | ZNF646    | zinc finger protein 646                                                                             | 3.32E-08 | No  | No  | No  | Yes | No | No  | No  |
| 375346 | TMEM110   | transmembrane protein 110                                                                           | 3.33E-08 | Yes | No  | Yes | No  | No | No  | No  |
| 340481 | ZDHHC21   | zinc finger, DHHC-type containing 21                                                                | 3.35E-08 | Yes | No  | No  | Yes | No | No  | No  |

|        |           |                                                                                   |          |     |     |     |     |     |     |    |
|--------|-----------|-----------------------------------------------------------------------------------|----------|-----|-----|-----|-----|-----|-----|----|
| 11214  | AKAP13    | A kinase (PRKA) anchor protein 13                                                 | 3.40E-08 | Yes | No  | No  | Yes | No  | No  | No |
| 81537  | SGPP1     | sphingosine-1-phosphate phosphatase 1                                             | 3.42E-08 | No  | No  | Yes | No  | No  | No  | No |
| 4688   | NCF2      | neutrophil cytosolic factor 2 (65kDa, chronic granulomatous disease, autosomal 2) | 3.43E-08 | Yes | Yes | No  | Yes | No  | No  | No |
| 11177  | BAZ1A     | bromodomain adjacent to zinc finger domain, 1A                                    | 3.45E-08 | No  | No  | No  | Yes | No  | No  | No |
| 80774  | LIMD2     | LIM domain containing 2                                                           | 3.45E-08 | No  | No  | No  | Yes | No  | No  | No |
| 26025  | PCDHGA12  | protocadherin gamma subfamily A, 12                                               | 3.46E-08 | NA* | Yes | Yes | No  | No  | No  | No |
| 4720   | NDUFS2    | NADH dehydrogenase (ubiquinone) Fe-S protein 2, 49kDa (NADH-coenzyme Q reductase) | 3.48E-08 | No  | No  | Yes | No  | No  | No  | No |
| 150165 | XKR3      | XK, Kell blood group complex subunit-related family, member 3                     | 3.48E-08 | NA  | No  | Yes | No  | No  | No  | No |
| 91452  | ACBD5     | acyl-Coenzyme A binding domain containing 5                                       | 3.51E-08 | No  | No  | No  | Yes | No  | No  | No |
| 11267  | SNF8      | SNF8, ESCRT-II complex subunit, homolog (S. cerevisiae)                           | 3.53E-08 | No  | No  | No  | No  | Yes | No  | No |
| 40     | ACCN1     | amiloride-sensitive cation channel 1, neuronal (degenerin)                        | 3.54E-08 | No  | No  | No  | Yes | No  | No  | No |
| 23367  | LARP1     | La ribonucleoprotein domain family, member 1                                      | 3.56E-08 | No  | No  | Yes | No  | No  | No  | No |
| 80319  | CXXC4     | CXXC finger 4                                                                     | 3.57E-08 | Yes | No  | Yes | No  | No  | No  | No |
| 55775  | TDP1      | tyrosyl-DNA phosphodiesterase 1                                                   | 3.60E-08 | No  | No  | Yes | No  | No  | No  | No |
| 11172  | INSL6     | insulin-like 6                                                                    | 3.63E-08 | No  | No  | Yes | No  | No  | No  | No |
| 8795   | TNFRSF10B | tumor necrosis factor receptor superfamily, member 10b                            | 3.69E-08 | Yes | No  | Yes | No  | No  | No  | No |
| 83759  | RBM4B     | RNA binding motif protein 4B                                                      | 3.69E-08 | Yes | No  | Yes | No  | No  | Yes | No |
| 65056  | GPBP1     | GC-rich promoter binding protein 1                                                | 3.72E-08 | No  | No  | No  | No  | Yes | Yes | No |
| 54014  | BRWD1     | bromodomain and WD repeat domain containing 1                                     | 3.75E-08 | No  | Yes | Yes | No  | No  | Yes | No |
| 7728   | ZNF175    | zinc finger protein 175                                                           | 3.77E-08 | Yes | No  | Yes | No  | No  | No  | No |
| 10111  | RAD50     | RAD50 homolog (S. cerevisiae)                                                     | 3.78E-08 | Yes | No  | Yes | No  | No  | No  | No |
| 29119  | CTNNA3    | catenin (cadherin-associated protein), alpha 3                                    | 3.83E-08 | No  | No  | Yes | No  | No  | No  | No |
| 55140  | ELP3      | elongation protein 3 homolog (S. cerevisiae)                                      | 3.83E-08 | No  | No  | Yes | No  | No  | Yes | No |
| 4077   | NBR1      | neighbor of BRCA1 gene 1                                                          | 3.83E-08 | No  | No  | No  | Yes | No  | No  | No |
| 4236   | MFAP1     | microfibrillar-associated protein 1                                               | 3.91E-08 | No  | No  | Yes | No  | No  | No  | No |
| 27069  | GHITM     | growth hormone inducible transmembrane protein                                    | 3.92E-08 | No  | No  | Yes | No  | No  | No  | No |
| 84271  | POLDIP3   | polymerase (DNA-directed), delta interacting protein 3                            | 3.92E-08 | No  | No  | Yes | No  | No  | Yes | No |
| 6004   | RGS16     | regulator of G-protein signaling 16                                               | 3.96E-08 | No  | No  | No  | Yes | No  | No  | No |
| 91975  | ZNF300    | zinc finger protein 300                                                           | 3.98E-08 | No  | No  | Yes | No  | No  | No  | No |
| 2487   | FRZB      | frizzled-related protein                                                          | 3.98E-08 | No  | No  | Yes | No  | No  | No  | No |
| 81034  | SLC25A32  | solute carrier family 25, member 32                                               | 4.01E-08 | No  | No  | Yes | No  | No  | Yes | No |
| 165055 | CCDC138   | coiled-coil domain containing 138                                                 | 4.01E-08 | No  | No  | No  | No  | No  | No  | No |
| 483    | ATP1B3    | ATPase, Na+/K+ transporting, beta 3 polypeptide                                   | 4.01E-08 | No  | No  | No  | Yes | No  | Yes | No |
| 10465  | PPIH      | peptidylprolyl isomerase H (cyclophilin H)                                        | 4.02E-08 | No  | No  | No  | No  | Yes | No  | No |

|        |          |                                                                |          |     |     |     |     |     |     |    |
|--------|----------|----------------------------------------------------------------|----------|-----|-----|-----|-----|-----|-----|----|
| 5257   | PHKB     | phosphorylase kinase, beta                                     | 4.04E-08 | Yes | No  | Yes | No  | No  | Yes | No |
| 9994   | CASP8AP2 | CASP8 associated protein 2                                     | 4.04E-08 | No  | No  | Yes | No  | No  | No  | No |
| 9665   | KIAA0430 | KIAA0430                                                       | 4.04E-08 | No  | Yes | Yes | No  | No  | Yes | No |
| 143425 | SYT9     | synaptotagmin IX                                               | 4.04E-08 | Yes | No  | No  | Yes | No  | No  | No |
| 64092  | SAMSN1   | SAM domain, SH3 domain and nuclear localization signals 1      | 4.05E-08 | Yes | Yes | Yes | No  | No  | No  | No |
| 51206  | GP6      | glycoprotein VI (platelet)                                     | 4.10E-08 | No  | No  | Yes | No  | No  | No  | No |
| 81030  | ZBP1     | Z-DNA binding protein 1                                        | 4.14E-08 | Yes | No  | Yes | No  | No  | No  | No |
| 200172 | SLFNL1   | schlafen-like 1                                                | 4.17E-08 | No  | No  | No  | Yes | No  | No  | No |
| 163    | AP2B1    | adaptor-related protein complex 2, beta 1 subunit              | 4.19E-08 | Yes | No  | Yes | No  | No  | Yes | No |
| 5193   | PEX12    | peroxisomal biogenesis factor 12                               | 4.19E-08 | No  | No  | Yes | No  | No  | No  | No |
| 23264  | ZC3H7B   | zinc finger CCCH-type containing 7B                            | 4.21E-08 | No  | No  | No  | Yes | No  | Yes | No |
| 3112   | HLA-DOB  | major histocompatibility complex, class II, DO beta            | 4.22E-08 | No  | No  | Yes | No  | No  | No  | No |
| 8898   | MTMR2    | myotubularin related protein 2                                 | 4.27E-08 | No  | No  | Yes | No  | No  | No  | No |
| 3280   | HES1     | hairly and enhancer of split 1, (Drosophila)                   | 4.27E-08 | Yes | No  | Yes | No  | No  | No  | No |
| 168451 | THAP5    | THAP domain containing 5                                       | 4.33E-08 | Yes | Yes | Yes | No  | No  | No  | No |
| 6208   | RPS14    | ribosomal protein S14                                          | 4.37E-08 | Yes | No  | No  | Yes | No  | No  | No |
| 11021  | RAB35    | RAB35, member RAS oncogene family                              | 4.43E-08 | No  | No  | Yes | No  | No  | No  | No |
| 23421  | ITGB3BP  | integrin beta 3 binding protein (beta3-endonexin)              | 4.50E-08 | No  | No  | No  | Yes | No  | Yes | No |
| 55784  | MCTP2    | multiple C2 domains, transmembrane 2                           | 4.62E-08 | No  | Yes | Yes | No  | No  | No  | No |
| 56267  | CCBL2    | cysteine conjugate-beta lyase 2                                | 4.65E-08 | No  | No  | Yes | No  | No  | Yes | No |
| 197131 | UBR1     | ubiquitin protein ligase E3 component n-recogin 1              | 4.66E-08 | No  | No  | No  | Yes | No  | No  | No |
| 152519 | NPAL1    | NIPA-like domain containing 1                                  | 4.70E-08 | NA  | No  | Yes | No  | No  | No  | No |
| 25853  | WDR40A   | WD repeat domain 40A                                           | 4.71E-08 | No  | No  | Yes | No  | No  | No  | No |
| 81793  | TLR10    | toll-like receptor 10                                          | 4.72E-08 | No  | No  | Yes | No  | No  | No  | No |
| 122553 | TRAPPC6B | trafficking protein particle complex 6B                        | 4.73E-08 | No  | No  | Yes | No  | No  | No  | No |
| 10813  | UTP14A   | UTP14, U3 small nucleolar ribonucleoprotein, homolog A (yeast) | 4.73E-08 | No  | No  | No  | Yes | No  | No  | No |
| 3621   | ING1     | inhibitor of growth family, member 1                           | 4.73E-08 | No  | No  | No  | No  | Yes | Yes | No |
| 8871   | SYNJ2    | synaptojanin 2                                                 | 4.74E-08 | Yes | No  | Yes | No  | No  | No  | No |
| 1456   | CSNK1G3  | casein kinase 1, gamma 3                                       | 4.80E-08 | Yes | Yes | Yes | No  | No  | No  | No |
| 8570   | KHSRP    | KH-type splicing regulatory protein                            | 4.83E-08 | No  | Yes | No  | Yes | No  | No  | No |
| 29089  | UBE2T    | ubiquitin-conjugating enzyme E2T (putative)                    | 4.83E-08 | No  | No  | Yes | No  | No  | No  | No |
| 10794  | ZNF460   | zinc finger protein 460                                        | 4.87E-08 | No  | No  | Yes | No  | No  | No  | No |
| 8819   | SAP30    | Sin3A-associated protein, 30kDa                                | 4.88E-08 | No  | No  | Yes | No  | No  | Yes | No |
| 51144  | HSD17B12 | hydroxysteroid (17-beta) dehydrogenase 12                      | 4.88E-08 | No  | Yes | Yes | No  | No  | No  | No |

|        |           |                                                                        |          |     |     |     |     |     |     |    |
|--------|-----------|------------------------------------------------------------------------|----------|-----|-----|-----|-----|-----|-----|----|
| 5912   | RAP2B     | RAP2B, member of RAS oncogene family                                   | 4.88E-08 | No  | No  | Yes | No  | No  | No  | No |
| 90390  | MED30     | mediator complex subunit 30                                            | 4.89E-08 | No  | No  | Yes | No  | No  | No  | No |
| 29761  | USP25     | ubiquitin specific peptidase 25                                        | 4.89E-08 | Yes | No  | Yes | No  | No  | Yes | No |
| 89970  | RSPRY1    | ring finger and SPRY domain containing 1                               | 4.91E-08 | No  | No  | No  | Yes | No  | No  | No |
| 10327  | AKR1A1    | aldo-keto reductase family 1, member A1 (aldehyde reductase)           | 4.93E-08 | No  | No  | No  | Yes | No  | No  | No |
| 4736   | RPL10A    | ribosomal protein L10a                                                 | 4.96E-08 | No  | No  | No  | No  | No  | No  | No |
| 257062 | TMEM146   | transmembrane protein 146                                              | 4.99E-08 | No  | No  | No  | No  | No  | Yes | No |
| 9361   | LONP1     | lon peptidase 1, mitochondrial                                         | 4.99E-08 | No  | No  | No  | Yes | No  | Yes | No |
| 152559 | PAQR3     | progesterin and adipoQ receptor family member III                      | 5.02E-08 | No  | No  | No  | No  | Yes | No  | No |
| 639    | PRDM1     | PR domain containing 1, with ZNF domain                                | 5.05E-08 | Yes | No  | Yes | No  | No  | No  | No |
| 11232  | POLG2     | polymerase (DNA directed), gamma 2, accessory subunit                  | 5.05E-08 | No  | No  | Yes | No  | No  | Yes | No |
| 10043  | TOM1      | target of myb1 (chicken)                                               | 5.05E-08 | No  | No  | Yes | No  | No  | No  | No |
| 29121  | CLEC2D    | C-type lectin domain family 2, member D                                | 5.08E-08 | No  | No  | Yes | No  | No  | No  | No |
| 8227   | SFRS17A   | splicing factor, arginine/serine-rich 17A                              | 5.09E-08 | No  | No  | Yes | No  | No  | No  | No |
| 55500  | ETNK1     | ethanolamine kinase 1                                                  | 5.11E-08 | No  | No  | No  | No  | Yes | No  | No |
| 9363   | RAB33A    | RAB33A, member RAS oncogene family                                     | 5.12E-08 | No  | No  | Yes | No  | No  | No  | No |
| 9131   | AIFM1     | apoptosis-inducing factor, mitochondrion-associated, 1                 | 5.12E-08 | No  | No  | Yes | No  | No  | No  | No |
| 196    | AHR       | aryl hydrocarbon receptor                                              | 5.14E-08 | No  | No  | Yes | No  | No  | No  | No |
| 353219 | KAAG1     | kidney associated antigen 1                                            | 5.18E-08 | No  | No  | Yes | No  | No  | No  | No |
| 51562  | MBIP      | MAP3K12 binding inhibitory protein 1                                   | 5.20E-08 | No  | No  | Yes | No  | No  | No  | No |
| 3052   | HCCS      | holocytochrome c synthase (cytochrome c heme-lyase)                    | 5.20E-08 | No  | Yes | No  | Yes | No  | No  | No |
| 25915  | C3orf60   | chromosome 3 open reading frame 60                                     | 5.23E-08 | No  | No  | No  | Yes | No  | No  | No |
| 8543   | LMO4      | LIM domain only 4                                                      | 5.23E-08 | No  | No  | Yes | No  | No  | No  | No |
| 3748   | KCNC3     | potassium voltage-gated channel, Shaw-related subfamily, member 3      | 5.28E-08 | No  | No  | No  | Yes | No  | No  | No |
| 2957   | GTF2A1    | general transcription factor IIA, 1, 19/37kDa                          | 5.29E-08 | No  | No  | Yes | No  | No  | No  | No |
| 9120   | SLC16A6   | solute carrier family 16, member 6 (monocarboxylic acid transporter 7) | 5.32E-08 | No  | No  | Yes | No  | No  | No  | No |
| 134218 | DNAJC21   | DnaJ (Hsp40) homolog, subfamily C, member 21                           | 5.33E-08 | Yes | No  | Yes | No  | No  | No  | No |
| 29760  | BLNK      | B-cell linker                                                          | 5.33E-08 | No  | No  | Yes | No  | No  | No  | No |
| 55215  | FANCI     | Fanconi anemia, complementation group I                                | 5.33E-08 | No  | No  | No  | Yes | No  | No  | No |
| 160335 | TMTC2     | transmembrane and tetratricopeptide repeat containing 2                | 5.36E-08 | No  | No  | No  | Yes | No  | No  | No |
| 8368   | HIST1H4L  | histone cluster 1, H4l                                                 | 5.36E-08 | No  | Yes | Yes | No  | No  | Yes | No |
| 8968   | HIST1H3F  | histone cluster 1, H3f                                                 | 5.37E-08 | No  | No  | Yes | No  | No  | No  | No |
| 8345   | HIST1H2BH | histone cluster 1, H2bh                                                | 5.37E-08 | NA  | No  | Yes | No  | No  | No  | No |
| 256646 | C15orf55  | chromosome 15 open reading frame 55                                    | 5.45E-08 | No  | No  | Yes | No  | No  | No  | No |

|        |          |                                                                                              |          |     |     |     |     |     |     |    |
|--------|----------|----------------------------------------------------------------------------------------------|----------|-----|-----|-----|-----|-----|-----|----|
| 6093   | ROCK1    | Rho-associated, coiled-coil containing protein kinase 1                                      | 5.45E-08 | Yes | No  | Yes | No  | No  | No  | No |
| 22890  | ZBTB1    | zinc finger and BTB domain containing 1                                                      | 5.49E-08 | No  | No  | No  | Yes | No  | No  | No |
| 6498   | SKIL     | SKI-like oncogene                                                                            | 5.49E-08 | Yes | Yes | Yes | No  | No  | No  | No |
| 26207  | PITPNC1  | phosphatidylinositol transfer protein, cytoplasmic 1                                         | 5.51E-08 | No  | Yes | Yes | No  | No  | Yes | No |
| 64786  | TBC1D15  | TBC1 domain family, member 15                                                                | 5.51E-08 | Yes | No  | Yes | No  | No  | Yes | No |
| 55332  | DRAM     | damage-regulated autophagy modulator                                                         | 5.56E-08 | Yes | No  | Yes | No  | No  | No  | No |
| 8353   | HIST1H3E | histone cluster 1, H3e                                                                       | 5.61E-08 | No  | No  | Yes | No  | No  | No  | No |
| 90338  | ZNF160   | zinc finger protein 160                                                                      | 5.63E-08 | Yes | No  | Yes | No  | No  | No  | No |
| 51249  | TMEM69   | transmembrane protein 69                                                                     | 5.64E-08 | No  | No  | Yes | No  | No  | Yes | No |
| 79951  | ---      | ---                                                                                          | 5.64E-08 | No  | No  | No  | Yes | No  | No  | No |
| 64232  | MS4A5    | membrane-spanning 4-domains, subfamily A, member 5                                           | 5.67E-08 | No  | No  | No  | Yes | No  | No  | No |
| 6511   | SLC1A6   | solute carrier family 1 (high affinity aspartate/glutamate transporter), member 6            | 5.70E-08 | No  | No  | No  | No  | Yes | No  | No |
| 3329   | HSPD1    | heat shock 60kDa protein 1 (chaperonin)                                                      | 5.77E-08 | No  | No  | No  | No  | Yes | No  | No |
| 84824  | FCRLA    | Fc receptor-like A                                                                           | 5.95E-08 | No  | No  | Yes | No  | No  | No  | No |
| 1368   | CPM      | carboxypeptidase M                                                                           | 5.95E-08 | No  | Yes | No  | Yes | No  | No  | No |
| 4665   | NAB2     | NGFI-A binding protein 2 (EGR1 binding protein 2)                                            | 5.95E-08 | Yes | No  | No  | Yes | No  | Yes | No |
| 23306  | TMEM194A | transmembrane protein 194A                                                                   | 5.95E-08 | No  | No  | No  | Yes | No  | No  | No |
| 387893 | SETD8    | SET domain containing (lysine methyltransferase) 8                                           | 5.98E-08 | No  | No  | Yes | No  | No  | No  | No |
| 91607  | SLFN11   | schlafen family member 11                                                                    | 6.01E-08 | Yes | No  | Yes | No  | No  | No  | No |
| 84919  | PPP1R15B | protein phosphatase 1, regulatory (inhibitor) subunit 15B                                    | 6.01E-08 | No  | No  | Yes | No  | No  | No  | No |
| 23185  | LARP5    | La ribonucleoprotein domain family, member 5                                                 | 6.08E-08 | No  | No  | Yes | No  | No  | No  | No |
| 23480  | SEC61G   | Sec61 gamma subunit                                                                          | 6.11E-08 | No  | No  | Yes | No  | No  | Yes | No |
| 23075  | SWAP70   | SWAP-70 protein                                                                              | 6.14E-08 | No  | Yes | Yes | No  | No  | Yes | No |
| 55529  | TMEM55A  | transmembrane protein 55A                                                                    | 6.14E-08 | Yes | No  | No  | Yes | No  | No  | No |
| 10252  | SPRY1    | sprouty homolog 1, antagonist of FGF signaling (Drosophila)                                  | 6.16E-08 | Yes | No  | Yes | No  | No  | No  | No |
| 199786 | FAM129C  | family with sequence similarity 129, member C                                                | 6.16E-08 | Yes | No  | No  | Yes | No  | No  | No |
| 55632  | KIAA1333 | KIAA1333                                                                                     | 6.22E-08 | No  | No  | Yes | No  | No  | Yes | No |
| 65977  | PLEKHA3  | pleckstrin homology domain containing, family A (phosphoinositide binding specific) member 3 | 6.28E-08 | No  | No  | No  | Yes | No  | No  | No |
| 84981  | C17orf91 | chromosome 17 open reading frame 91                                                          | 6.31E-08 | No  | No  | No  | Yes | No  | Yes | No |
| 23613  | ZMYND8   | zinc finger, MYND-type containing 8                                                          | 6.34E-08 | No  | No  | Yes | No  | No  | No  | No |
| 10959  | TMED2    | transmembrane emp24 domain trafficking protein 2                                             | 6.34E-08 | No  | No  | Yes | No  | No  | No  | No |
| 81671  | TMEM49   | transmembrane protein 49                                                                     | 6.38E-08 | Yes | No  | Yes | No  | No  | Yes | No |
| 132864 | CPEB2    | cytoplasmic polyadenylation element binding protein 2                                        | 6.41E-08 | Yes | No  | Yes | No  | No  | No  | No |
| 157313 | CDCA2    | cell division cycle associated 2                                                             | 6.42E-08 | No  | No  | Yes | No  | No  | No  | No |

|        |          |                                                                                              |          |     |     |     |     |    |     |    |
|--------|----------|----------------------------------------------------------------------------------------------|----------|-----|-----|-----|-----|----|-----|----|
| 54793  | KCTD9    | potassium channel tetramerisation domain containing 9                                        | 6.42E-08 | No  | No  | Yes | No  | No | No  | No |
| 4649   | MYO9A    | myosin IXA                                                                                   | 6.45E-08 | No  | Yes | Yes | No  | No | No  | No |
| 123228 | SENP8    | SUMO/sentrin specific peptidase family member 8                                              | 6.45E-08 | No  | No  | Yes | No  | No | No  | No |
| 51054  | PLEKHA9  | pleckstrin homology domain containing, family A (phosphoinositide binding specific) member 9 | 6.46E-08 | No  | No  | Yes | No  | No | No  | No |
| 6557   | SLC12A1  | solute carrier family 12 (sodium/potassium/chloride transporters), member 1                  | 6.52E-08 | Yes | No  | Yes | No  | No | No  | No |
| 26160  | IFT172   | intraflagellar transport 172 homolog (Chlamydomonas)                                         | 6.56E-08 | No  | No  | No  | Yes | No | Yes | No |
| 2782   | GNB1     | guanine nucleotide binding protein (G protein), beta polypeptide 1                           | 6.56E-08 | No  | No  | Yes | No  | No | No  | No |
| 2130   | EWSR1    | Ewing sarcoma breakpoint region 1                                                            | 6.56E-08 | No  | No  | No  | Yes | No | Yes | No |
| 3895   | KTN1     | kinesin 1 (kinesin receptor)                                                                 | 6.71E-08 | No  | No  | Yes | No  | No | No  | No |
| 127396 | ZNF684   | zinc finger protein 684                                                                      | 6.79E-08 | No  | No  | Yes | No  | No | No  | No |
| 4820   | NKTR     | natural killer-tumor recognition sequence                                                    | 6.80E-08 | No  | No  | Yes | No  | No | No  | No |
| 2120   | ETV6     | ets variant gene 6 (TEL oncogene)                                                            | 6.82E-08 | Yes | Yes | Yes | No  | No | No  | No |
| 5864   | RAB3A    | RAB3A, member RAS oncogene family                                                            | 6.82E-08 | No  | No  | No  | Yes | No | No  | No |
| 5244   | ABCB4    | ATP-binding cassette, sub-family B (MDR/TAP), member 4                                       | 6.83E-08 | Yes | No  | Yes | No  | No | No  | No |
| 7803   | PTP4A1   | protein tyrosine phosphatase type IVA, member 1                                              | 6.85E-08 | Yes | Yes | Yes | No  | No | Yes | No |
| 56997  | CABC1    | chaperone, ABC1 activity of bc1 complex homolog (S. pombe)                                   | 6.95E-08 | Yes | No  | No  | Yes | No | No  | No |
| 5509   | PPP1R3D  | protein phosphatase 1, regulatory (inhibitor) subunit 3D                                     | 7.01E-08 | Yes | No  | No  | No  | No | No  | No |
| 196441 | CCDC131  | coiled-coil domain containing 131                                                            | 7.03E-08 | No  | No  | Yes | No  | No | Yes | No |
| 84286  | TMEM175  | transmembrane protein 175                                                                    | 7.06E-08 | Yes | No  | No  | Yes | No | Yes | No |
| 54443  | ANLN     | anillin, actin binding protein                                                               | 7.11E-08 | No  | No  | Yes | No  | No | No  | No |
| 147694 | ZNF548   | zinc finger protein 548                                                                      | 7.25E-08 | Yes | No  | Yes | No  | No | No  | No |
| 58517  | RBM25    | RNA binding motif protein 25                                                                 | 7.28E-08 | No  | No  | Yes | No  | No | Yes | No |
| 8359   | HIST1H4A | histone cluster 1, H4a                                                                       | 7.28E-08 | No  | Yes | Yes | No  | No | No  | No |
| 81606  | LBH      | limb bud and heart development homolog (mouse)                                               | 7.34E-08 | Yes | No  | Yes | No  | No | No  | No |
| 10130  | PDIA6    | protein disulfide isomerase family A, member 6                                               | 7.36E-08 | No  | No  | No  | Yes | No | No  | No |
| 23116  | KIAA0423 | KIAA0423                                                                                     | 7.41E-08 | No  | No  | Yes | No  | No | No  | No |
| 23648  | SSBP3    | single stranded DNA binding protein 3                                                        | 7.42E-08 | No  | Yes | Yes | No  | No | No  | No |
| 64081  | PBLD     | phenazine biosynthesis-like protein domain containing                                        | 7.48E-08 | No  | No  | Yes | No  | No | No  | No |
| 54765  | TRIM44   | tripartite motif-containing 44                                                               | 7.48E-08 | Yes | No  | No  | Yes | No | No  | No |
| 4704   | NDUFA9   | NADH dehydrogenase (ubiquinone) 1 alpha subcomplex, 9, 39kDa                                 | 7.48E-08 | No  | No  | Yes | No  | No | No  | No |
| 7706   | TRIM25   | tripartite motif-containing 25                                                               | 7.54E-08 | No  | No  | Yes | No  | No | No  | No |
| 54682  | MANSC1   | MANSC domain containing 1                                                                    | 7.58E-08 | Yes | No  | No  | Yes | No | No  | No |
| 23318  | ZCCHC11  | zinc finger, CCHC domain containing 11                                                       | 7.58E-08 | Yes | No  | Yes | No  | No | No  | No |
| 55103  | RALGPS2  | Ral GEF with PH domain and SH3 binding motif 2                                               | 7.63E-08 | Yes | No  | Yes | No  | No | No  | No |

|        |           |                                                                     |          |     |     |     |     |     |     |     |
|--------|-----------|---------------------------------------------------------------------|----------|-----|-----|-----|-----|-----|-----|-----|
| 10628  | TXNIP     | thioredoxin interacting protein                                     | 7.65E-08 | Yes | No  | Yes | No  | No  | Yes | Yes |
| 11030  | RBPMS     | RNA binding protein with multiple splicing                          | 7.66E-08 | No  | No  | Yes | No  | No  | No  | No  |
| 81876  | RAB1B     | RAB1B, member RAS oncogene family                                   | 7.70E-08 | No  | No  | Yes | No  | No  | Yes | No  |
| 163702 | IL28RA    | interleukin 28 receptor, alpha (interferon, lambda receptor)        | 7.71E-08 | No  | No  | Yes | No  | No  | No  | No  |
| 7940   | LST1      | leukocyte specific transcript 1                                     | 7.73E-08 | No  | No  | No  | No  | Yes | Yes | No  |
| 4050   | LTB       | lymphotoxin beta (TNF superfamily, member 3)                        | 7.73E-08 | No  | No  | No  | No  | Yes | No  | No  |
| 6528   | SLC5A5    | solute carrier family 5 (sodium iodide symporter), member 5         | 7.74E-08 | No  |
| 4155   | MBP       | myelin basic protein                                                | 7.75E-08 | Yes | No  | Yes | No  | No  | No  | No  |
| 60468  | BACH2     | BTB and CNC homology 1, basic leucine zipper transcription factor 2 | 7.87E-08 | No  | No  | Yes | No  | No  | No  | No  |
| 1739   | DLG1      | discs, large homolog 1 (Drosophila)                                 | 7.88E-08 | No  | No  | Yes | No  | No  | No  | No  |
| 963    | CD53      | CD53 molecule                                                       | 7.96E-08 | No  | No  | No  | Yes | No  | Yes | No  |
| 23165  | NUP205    | nucleoporin 205kDa                                                  | 7.99E-08 | No  | No  | Yes | No  | No  | Yes | No  |
| 8658   | TNKS      | tankyrase, TRF1-interacting ankyrin-related ADP-ribose polymerase   | 8.02E-08 | No  |
| 196913 | LOC196913 | hypothetical protein LOC196913                                      | 8.03E-08 | No  | No  | No  | Yes | No  | No  | No  |
| 55284  | UBE2W     | ubiquitin-conjugating enzyme E2W (putative)                         | 8.07E-08 | Yes | Yes | Yes | No  | No  | No  | No  |
| 27430  | MAT2B     | methionine adenosyltransferase II, beta                             | 8.07E-08 | Yes | Yes | No  | No  | Yes | No  | No  |
| 613206 | LOC613206 | myeloproliferative disease associated tumor antigen 5               | 8.12E-08 | NA  | No  | Yes | No  | No  | No  | No  |
| 84318  | CCDC77    | coiled-coil domain containing 77                                    | 8.15E-08 | No  | No  | Yes | No  | No  | Yes | No  |
| 5715   | PSMD9     | proteasome (prosome, macropain) 26S subunit, non-ATPase, 9          | 8.17E-08 | No  | No  | Yes | No  | No  | No  | No  |
| 23468  | CBX5      | chromobox homolog 5 (HP1 alpha homolog, Drosophila)                 | 8.17E-08 | No  | No  | Yes | No  | No  | No  | No  |
| 57711  | ZNF529    | zinc finger protein 529                                             | 8.20E-08 | Yes | No  | Yes | No  | No  | No  | No  |
| 9202   | ZMYM4     | zinc finger, MYM-type 4                                             | 8.24E-08 | No  | No  | No  | Yes | No  | No  | No  |
| 84076  | TKTL2     | transketolase-like 2                                                | 8.25E-08 | No  | No  | Yes | No  | No  | No  | No  |
| 3313   | HSPA9     | heat shock 70kDa protein 9 (mortalin)                               | 8.33E-08 | No  | No  | Yes | No  | No  | No  | No  |
| 10146  | G3BP1     | GTPase activating protein (SH3 domain) binding protein 1            | 8.35E-08 | No  | No  | Yes | No  | No  | No  | No  |
| 284996 | RNF149    | ring finger protein 149                                             | 8.42E-08 | Yes | No  | Yes | No  | No  | No  | No  |
| 11034  | DSTN      | destrin (actin depolymerizing factor)                               | 8.43E-08 | No  | No  | Yes | No  | No  | No  | No  |
| 150274 | HSCB      | HscB iron-sulfur cluster co-chaperone homolog (E. coli)             | 8.45E-08 | No  | No  | No  | Yes | No  | Yes | No  |
| 26227  | PHGDH     | phosphoglycerate dehydrogenase                                      | 8.54E-08 | No  | No  | Yes | No  | No  | No  | No  |
| 124817 | CNTD1     | cyclin N-terminal domain containing 1                               | 8.58E-08 | No  | No  | Yes | No  | No  | No  | No  |
| 3018   | HIST1H2BB | histone cluster 1, H2bb                                             | 8.65E-08 | No  | No  | Yes | No  | No  | No  | No  |
| 8352   | HIST1H3C  | histone cluster 1, H3c                                              | 8.65E-08 | NA  | No  | Yes | No  | No  | No  | No  |
| 51719  | CAB39     | calcium binding protein 39                                          | 8.66E-08 | No  | No  | Yes | No  | No  | Yes | No  |
| 80021  | TMEM62    | transmembrane protein 62                                            | 8.70E-08 | No  | No  | Yes | No  | No  | No  | No  |



|        |           |                                                                   |          |     |     |     |     |     |     |    |
|--------|-----------|-------------------------------------------------------------------|----------|-----|-----|-----|-----|-----|-----|----|
| 147948 | ZNF582    | zinc finger protein 582                                           | 8.75E-08 | No  | No  | No  | Yes | No  | No  | No |
| 80004  | RBM35B    | RNA binding motif protein 35B                                     | 8.75E-08 | Yes | No  | No  | Yes | No  | No  | No |
| 51111  | SUV420H1  | suppressor of variegation 4-20 homolog 1 (Drosophila)             | 8.76E-08 | Yes | No  | Yes | No  | No  | No  | No |
| 10694  | CCT8      | chaperonin containing TCP1, subunit 8 (theta)                     | 8.81E-08 | No  | No  | Yes | No  | No  | No  | No |
| 54663  | WDR74     | WD repeat domain 74                                               | 8.81E-08 | No  | No  | Yes | No  | No  | No  | No |
| 57147  | SCYL3     | SCY1-like 3 (S. cerevisiae)                                       | 8.85E-08 | Yes | No  | Yes | No  | No  | Yes | No |
| 144455 | E2F7      | E2F transcription factor 7                                        | 8.90E-08 | No  | No  | No  | Yes | No  | No  | No |
| 26778  | SNORA70   | small nucleolar RNA, H/ACA box 70                                 | 8.92E-08 | NA  | No  | Yes | No  | No  | No  | No |
| 285331 | CCDC66    | coiled-coil domain containing 66                                  | 8.92E-08 | No  | No  | Yes | No  | No  | No  | No |
| 5810   | RAD1      | RAD1 homolog (S. pombe)                                           | 9.00E-08 | No  | No  | No  | Yes | No  | No  | No |
| 6671   | SP4       | Sp4 transcription factor                                          | 9.04E-08 | Yes | Yes | Yes | No  | No  | No  | No |
| 57192  | MCOLN1    | mucopolin 1                                                       | 9.05E-08 | No  | No  | No  | No  | No  | No  | No |
| 7809   | BSND      | Barter syndrome, infantile, with sensorineural deafness (Barttin) | 9.05E-08 | No  | No  | No  | No  | No  | No  | No |
| 96459  | FNIP1     | folliculin interacting protein 1                                  | 9.08E-08 | Yes | No  | No  | Yes | No  | No  | No |
| 54913  | RPP25     | ribonuclease P/MRP 25kDa subunit                                  | 9.14E-08 | No  | No  | No  | Yes | No  | No  | No |
| 5046   | PCSK6     | proprotein convertase subtilisin/kexin type 6                     | 9.16E-08 | Yes | No  | No  | Yes | No  | No  | No |
| 112744 | IL17F     | interleukin 17F                                                   | 9.17E-08 | No  | No  | Yes | No  | No  | No  | No |
| 56000  | NXF3      | nuclear RNA export factor 3                                       | 9.44E-08 | No  | No  | No  | Yes | No  | No  | No |
| 132671 | SPATA18   | spermatogenesis associated 18 homolog (rat)                       | 9.47E-08 | No  | No  | Yes | No  | No  | No  | No |
| 57167  | SALL4     | sall-like 4 (Drosophila)                                          | 9.56E-08 | No  | No  | Yes | No  | No  | No  | No |
| 6428   | SFRS3     | splicing factor, arginine/serine-rich 3                           | 9.59E-08 | No  | No  | No  | Yes | No  | No  | No |
| 440867 | FLJ16124  | FLJ16124 protein                                                  | 9.69E-08 | Yes | No  | Yes | No  | No  | No  | No |
| 200734 | SPRED2    | sprouty-related, EVH1 domain containing 2                         | 9.69E-08 | No  | Yes | Yes | No  | No  | No  | No |
| 79706  | PRKRIP1   | PRKR interacting protein 1 (IL11 inducible)                       | 9.73E-08 | No  | Yes | No  | Yes | No  | No  | No |
| 390992 | HES3      | hairy and enhancer of split 3 (Drosophila)                        | 9.79E-08 | NA  | No  | Yes | No  | No  | No  | No |
| 4064   | CD180     | CD180 molecule                                                    | 9.83E-08 | No  | No  | No  | No  | Yes | No  | No |
| 64581  | CLECTA    | C-type lectin domain family 7, member A                           | 1.00E-07 | Yes | No  | Yes | No  | No  | No  | No |
| 55610  | CCDC132   | coiled-coil domain containing 132                                 | 1.01E-07 | No  | No  | Yes | No  | No  | No  | No |
| 253012 | LOC253012 | hypothetical protein LOC253012                                    | 1.01E-07 | No  | No  | Yes | No  | No  | No  | No |
| 6855   | SYP       | synaptophysin                                                     | 1.01E-07 | No  | No  | Yes | No  | No  | No  | No |
| 4094   | MAF       | v-maf musculoaponeurotic fibrosarcoma oncogene homolog (avian)    | 1.01E-07 | No  | No  | Yes | No  | No  | No  | No |
| 11170  | FAM107A   | family with sequence similarity 107, member A                     | 1.02E-07 | No  | No  | No  | Yes | No  | No  | No |
| 153830 | RNF145    | ring finger protein 145                                           | 1.02E-07 | Yes | No  | Yes | No  | No  | No  | No |
| 80099  | FLJ21075  | hypothetical protein FLJ21075                                     | 1.02E-07 | No  | No  | No  | No  | No  | No  | No |

|        |          |                                                                                          |          |     |     |     |     |     |     |     |
|--------|----------|------------------------------------------------------------------------------------------|----------|-----|-----|-----|-----|-----|-----|-----|
| 338376 | IFNE1    | interferon epsilon 1                                                                     | 1.04E-07 | No  | No  | No  | Yes | No  | No  | No  |
| 6850   | SYK      | spleen tyrosine kinase                                                                   | 1.05E-07 | No  | No  | Yes | No  | No  | Yes | No  |
| 51701  | NLK      | nemo-like kinase                                                                         | 1.05E-07 | No  | Yes | No  | No  | Yes | No  | No  |
| 340348 | TSPAN33  | tetraspanin 33                                                                           | 1.05E-07 | Yes | No  | No  | No  | Yes | No  | No  |
| 5454   | POU3F2   | POU class 3 homeobox 2                                                                   | 1.05E-07 | No  | No  | Yes | No  | No  | No  | No  |
| 55370  | PPP4R1L  | protein phosphatase 4, regulatory subunit 1-like                                         | 1.06E-07 | No  | No  | No  | Yes | No  | No  | No  |
| 9686   | VGLL4    | vestigial like 4 (Drosophila)                                                            | 1.06E-07 | No  | Yes | No  | Yes | No  | No  | No  |
| 284747 | ZNF663   | zinc finger protein 663                                                                  | 1.07E-07 | NA  | No  | Yes | No  | No  | No  | No  |
| 4931   | NVL      | nuclear VCP-like                                                                         | 1.07E-07 | No  | No  | Yes | No  | No  | No  | No  |
| 8659   | ALDH4A1  | aldehyde dehydrogenase 4 family, member A1                                               | 1.08E-07 | No  | No  | Yes | No  | No  | No  | No  |
| 3909   | LAMA3    | laminin, alpha 3                                                                         | 1.09E-07 | No  | No  | No  | Yes | No  | No  | No  |
| 6144   | RPL21    | ribosomal protein L21                                                                    | 1.09E-07 | No  | No  | Yes | No  | No  | No  | No  |
| 4916   | NTRK3    | neurotrophic tyrosine kinase, receptor, type 3                                           | 1.09E-07 | Yes | No  | No  | Yes | No  | No  | No  |
| 23213  | SULF1    | sulfatase 1                                                                              | 1.10E-07 | No  | No  | Yes | No  | No  | No  | No  |
| 23224  | SYNE2    | spectrin repeat containing, nuclear envelope 2                                           | 1.11E-07 | No  | Yes | Yes | No  | No  | No  | No  |
| 283310 | C12orf64 | chromosome 12 open reading frame 64                                                      | 1.11E-07 | NA  | No  | Yes | No  | No  | No  | No  |
| 84936  | ZFYVE19  | zinc finger, FYVE domain containing 19                                                   | 1.11E-07 | No  | No  | Yes | No  | No  | No  | No  |
| 11339  | OIP5     | Opa interacting protein 5                                                                | 1.11E-07 | No  | No  | Yes | No  | No  | No  | No  |
| 51096  | UTP18    | UTP18, small subunit (SSU) processome component, homolog (yeast)                         | 1.11E-07 | No  | No  | Yes | No  | No  | No  | No  |
| 2779   | GNAT1    | guanine nucleotide binding protein (G protein), alpha transducing activity polypeptide 1 | 1.11E-07 | Yes | No  | No  | No  | No  | No  | No  |
| 26145  | IRF2BP1  | interferon regulatory factor 2 binding protein 1                                         | 1.12E-07 | No  |
| 1879   | EBF1     | early B-cell factor 1                                                                    | 1.12E-07 | No  | No  | Yes | No  | No  | Yes | No  |
| 3921   | RPSA     | ribosomal protein SA                                                                     | 1.13E-07 | NA  | No  | Yes | No  | No  | No  | No  |
| 3587   | IL10RA   | interleukin 10 receptor, alpha                                                           | 1.13E-07 | Yes | No  | Yes | No  | No  | Yes | No  |
| 51175  | TUBE1    | tubulin, epsilon 1                                                                       | 1.14E-07 | Yes | No  | Yes | No  | No  | No  | No  |
| 10928  | RALBP1   | ralA binding protein 1                                                                   | 1.14E-07 | No  | No  | Yes | No  | No  | No  | No  |
| 4261   | CIITA    | class II, major histocompatibility complex, transactivator                               | 1.15E-07 | Yes | No  | No  | No  | Yes | Yes | Yes |
| 7029   | TFDP2    | transcription factor Dp-2 (E2F dimerization partner 2)                                   | 1.16E-07 | No  | No  | Yes | No  | No  | No  | No  |
| 1398   | CRK      | v-crk sarcoma virus CT10 oncogene homolog (avian)                                        | 1.16E-07 | No  | No  | No  | Yes | No  | No  | No  |
| 27349  | MCAT     | malonyl CoA:ACP acyltransferase (mitochondrial)                                          | 1.16E-07 | No  | No  | No  | Yes | No  | No  | No  |
| 346525 | OR2A12   | olfactory receptor, family 2, subfamily A, member 12                                     | 1.17E-07 | NA  | No  | No  | Yes | No  | No  | No  |
| 50615  | IL21R    | interleukin 21 receptor                                                                  | 1.17E-07 | No  | No  | Yes | No  | No  | No  | No  |
| 8326   | FZD9     | frizzled homolog 9 (Drosophila)                                                          | 1.17E-07 | No  |
| 7584   | ZNF35    | zinc finger protein 35                                                                   | 1.18E-07 | No  | No  | No  | Yes | No  | No  | No  |

|        |          |                                                                                                |          |     |     |     |     |     |     |    |
|--------|----------|------------------------------------------------------------------------------------------------|----------|-----|-----|-----|-----|-----|-----|----|
| 9262   | STK17B   | serine/threonine kinase 17b                                                                    | 1.18E-07 | Yes | No  | No  | Yes | No  | No  | No |
| 1814   | DRD3     | dopamine receptor D3                                                                           | 1.18E-07 | No  | No  | No  | Yes | No  | No  | No |
| 4297   | MLL      | myeloid/lymphoid or mixed-lineage leukemia (trithorax homolog, Drosophila)                     | 1.18E-07 | No  | No  | Yes | No  | No  | Yes | No |
| 9375   | TM9SF2   | transmembrane 9 superfamily member 2                                                           | 1.18E-07 | No  | No  | No  | Yes | No  | No  | No |
| 89872  | AQP10    | aquaporin 10                                                                                   | 1.19E-07 | No  | No  | No  | Yes | No  | No  | No |
| 10524  | HTATIP   | HIV-1 Tat interacting protein, 60kDa                                                           | 1.19E-07 | No  | No  | No  | Yes | No  | No  | No |
| 282991 | BLOC1S2  | biogenesis of lysosome-related organelles complex-1, subunit 2                                 | 1.19E-07 | No  | No  | Yes | No  | No  | No  | No |
| 150275 | CCDC117  | coiled-coil domain containing 117                                                              | 1.19E-07 | No  | No  | No  | No  | No  | No  | No |
| 3020   | H3F3A    | H3 histone, family 3A                                                                          | 1.20E-07 | No  | No  | Yes | No  | No  | No  | No |
| 389064 | FLJ46347 | hypothetical LOC389064                                                                         | 1.20E-07 | NA  | No  | Yes | No  | No  | No  | No |
| 677811 | SNORA28  | small nucleolar RNA, H/ACA box 28                                                              | 1.21E-07 | NA  | No  | Yes | No  | No  | No  | No |
| 84335  | AKT1S1   | AKT1 substrate 1 (proline-rich)                                                                | 1.21E-07 | No  | No  | No  | Yes | No  | Yes | No |
| 5756   | TWF1     | twinstin, actin-binding protein, homolog 1 (Drosophila)                                        | 1.23E-07 | No  | No  | No  | Yes | No  | No  | No |
| 54502  | RBM47    | RNA binding motif protein 47                                                                   | 1.25E-07 | Yes | Yes | No  | No  | No  | Yes | No |
| 5826   | ABCD4    | ATP-binding cassette, sub-family D (ALD), member 4                                             | 1.25E-07 | No  | No  | Yes | No  | No  | No  | No |
| 3707   | ITPKB    | inositol 1,4,5-trisphosphate 3-kinase B                                                        | 1.26E-07 | No  | No  | Yes | No  | No  | No  | No |
| 79664  | NARG2    | NMDA receptor regulated 2                                                                      | 1.27E-07 | No  | No  | Yes | No  | No  | Yes | No |
| 5033   | P4HA1    | procollagen-proline, 2-oxoglutarate 4-dioxygenase (proline 4-hydroxylase), alpha polypeptide 1 | 1.28E-07 | No  | No  | Yes | No  | No  | No  | No |
| 2526   | FUT4     | fucosyltransferase 4 (alpha (1,3) fucosyltransferase, myeloid-specific)                        | 1.29E-07 | No  | No  | No  | Yes | No  | No  | No |
| 7388   | UQCRH    | ubiquinol-cytochrome c reductase hinge protein                                                 | 1.29E-07 | No  | No  | Yes | No  | No  | No  | No |
| 10489  | LRRC41   | leucine rich repeat containing 41                                                              | 1.29E-07 | No  | No  | Yes | No  | No  | No  | No |
| 7093   | TLL2     | tolloid-like 2                                                                                 | 1.29E-07 | Yes | No  | Yes | No  | No  | No  | No |
| 8662   | EIF3B    | eukaryotic translation initiation factor 3, subunit B                                          | 1.30E-07 | No  | No  | No  | Yes | No  | No  | No |
| 6711   | SPTBN1   | spectrin, beta, non-erythrocytic 1                                                             | 1.30E-07 | No  | Yes | Yes | No  | No  | No  | No |
| 9456   | HOMER1   | homer homolog 1 (Drosophila)                                                                   | 1.31E-07 | Yes | Yes | Yes | No  | No  | No  | No |
| 79893  | GGNBP2   | gametogenetin binding protein 2                                                                | 1.31E-07 | No  | Yes | Yes | No  | No  | No  | No |
| 51426  | POLK     | polymerase (DNA directed) kappa                                                                | 1.31E-07 | Yes | No  | Yes | No  | No  | Yes | No |
| 26812  | SNORD37  | small nucleolar RNA, C/D box 37                                                                | 1.31E-07 | NA  | No  | No  | No  | Yes | No  | No |
| 130872 | AHSA2    | AHA1, activator of heat shock 90kDa protein ATPase homolog 2 (yeast)                           | 1.31E-07 | Yes | No  | No  | Yes | No  | No  | No |
| 3336   | HSPH1    | heat shock 10kDa protein 1 (chaperonin 10)                                                     | 1.33E-07 | No  | No  | Yes | No  | No  | No  | No |
| 26765  | SNORD12C | small nucleolar RNA, C/D box 12C                                                               | 1.33E-07 | NA  | No  | No  | No  | Yes | No  | No |
| 7326   | UBE2G1   | ubiquitin-conjugating enzyme E2G 1 (UBC7 homolog, yeast)                                       | 1.34E-07 | No  | No  | Yes | No  | No  | Yes | No |
| 80314  | EPC1     | enhancer of polycomb homolog 1 (Drosophila)                                                    | 1.34E-07 | No  | No  | No  | No  | Yes | No  | No |
| 3756   | KCNH1    | potassium voltage-gated channel, subfamily H (eag-related), member 1                           | 1.35E-07 | No  | No  | No  | Yes | No  | No  | No |

|        |          |                                                                                        |          |     |     |     |     |     |     |    |
|--------|----------|----------------------------------------------------------------------------------------|----------|-----|-----|-----|-----|-----|-----|----|
| 10564  | ARFGEF2  | ADP-ribosylation factor guanine nucleotide-exchange factor 2 (brefeldin A-inhibited)   | 1.36E-07 | No  | No  | Yes | No  | No  | No  | No |
| 6159   | RPL29    | ribosomal protein L29                                                                  | 1.38E-07 | No  | No  | No  | No  | No  | No  | No |
| 1054   | CEBPG    | CCAAT/enhancer binding protein (C/EBP), gamma                                          | 1.38E-07 | No  | No  | No  | Yes | No  | Yes | No |
| 4306   | NR3C2    | nuclear receptor subfamily 3, group C, member 2                                        | 1.38E-07 | Yes | No  | No  | Yes | No  | No  | No |
| 1633   | DCK      | deoxycytidine kinase                                                                   | 1.38E-07 | No  | No  | No  | Yes | No  | Yes | No |
| 221692 | PHACTR1  | phosphatase and actin regulator 1                                                      | 1.40E-07 | Yes | Yes | No  | Yes | No  | No  | No |
| 80020  | FOXRED2  | FAD-dependent oxidoreductase domain containing 2                                       | 1.40E-07 | No  | No  | No  | Yes | No  | No  | No |
| 64927  | TTC23    | tetratricopeptide repeat domain 23                                                     | 1.40E-07 | No  | No  | Yes | No  | No  | No  | No |
| 123355 | LRRC28   | leucine rich repeat containing 28                                                      | 1.40E-07 | No  | No  | Yes | No  | No  | No  | No |
| 5138   | PDE2A    | phosphodiesterase 2A, cGMP-stimulated                                                  | 1.40E-07 | No  | No  | No  | Yes | No  | No  | No |
| 23473  | CAPN7    | calpain 7                                                                              | 1.40E-07 | No  | No  | No  | Yes | No  | No  | No |
| 64951  | MRPS24   | mitochondrial ribosomal protein S24                                                    | 1.41E-07 | No  | No  | No  | No  | No  | No  | No |
| 5763   | PTMS     | parathyrosin                                                                           | 1.42E-07 | No  | No  | Yes | No  | No  | No  | No |
| 29126  | CD274    | CD274 molecule                                                                         | 1.42E-07 | Yes | Yes | No  | Yes | No  | Yes | No |
| 1786   | DNMT1    | DNA (cytosine-5)-methyltransferase 1                                                   | 1.43E-07 | No  | No  | Yes | No  | No  | No  | No |
| 51035  | LOC51035 | SAPK substrate protein 1                                                               | 1.43E-07 | No  | No  | Yes | No  | No  | Yes | No |
| 6426   | SFRS1    | splicing factor, arginine/serine-rich 1 (splicing factor 2, alternate splicing factor) | 1.44E-07 | No  | Yes | Yes | No  | No  | No  | No |
| 1121   | CHM      | choroideremia (Rab escort protein 1)                                                   | 1.45E-07 | Yes | No  | No  | No  | No  | No  | No |
| 57217  | TTC7A    | tetratricopeptide repeat domain 7A                                                     | 1.45E-07 | Yes | No  | No  | No  | No  | No  | No |
| 123872 | LRRC50   | leucine rich repeat containing 50                                                      | 1.45E-07 | No  | No  | Yes | No  | No  | No  | No |
| 64222  | TOR3A    | torsin family 3, member A                                                              | 1.45E-07 | No  | No  | No  | Yes | No  | Yes | No |
| 2235   | FECH     | ferrochelatase (protoporphyrin)                                                        | 1.46E-07 | Yes | Yes | Yes | No  | No  | No  | No |
| 26002  | MOXD1    | monooxygenase, DBH-like 1                                                              | 1.48E-07 | Yes | No  | No  | Yes | No  | No  | No |
| 10260  | DENND4A  | DENND4 domain containing 4A                                                            | 1.49E-07 | No  | No  | No  | No  | Yes | Yes | No |
| 51284  | TLR7     | toll-like receptor 7                                                                   | 1.49E-07 | Yes | Yes | No  | Yes | No  | No  | No |
| 56547  | MMP26    | matrix metalloproteinase 26                                                            | 1.50E-07 | No  | No  | No  | Yes | No  | No  | No |
| 64857  | PLEKHG2  | pleckstrin homology domain containing, family G (with RhoGef domain) member 2          | 1.50E-07 | Yes | No  | No  | Yes | No  | No  | No |
| 134391 | GPR151   | G protein-coupled receptor 151                                                         | 1.51E-07 | NA  | No  | Yes | No  | No  | No  | No |
| 158    | ADSL     | adenylosuccinate lyase                                                                 | 1.53E-07 | No  | No  | No  | Yes | No  | No  | No |
| 56886  | UGCG1    | UDP-glucose ceramide glucosyltransferase-like 1                                        | 1.58E-07 | No  | No  | Yes | No  | No  | No  | No |
| 5757   | PTMA     | prothymosin, alpha                                                                     | 1.60E-07 | No  | No  | No  | No  | Yes | No  | No |
| 63931  | MRPS14   | mitochondrial ribosomal protein S14                                                    | 1.60E-07 | No  | No  | Yes | No  | No  | No  | No |
| 10444  | ZER1     | zer-1 homolog (C. elegans)                                                             | 1.61E-07 | No  | No  | No  | No  | No  | No  | No |
| 22865  | SLITRK3  | SLIT and NTRK-like family, member 3                                                    | 1.62E-07 | No  | No  | No  | No  | No  | No  | No |

|        |          |                                                                                    |          |     |     |     |     |     |     |     |
|--------|----------|------------------------------------------------------------------------------------|----------|-----|-----|-----|-----|-----|-----|-----|
| 29934  | SNX12    | sorting nexin 12                                                                   | 1.63E-07 | No  | No  | No  | Yes | No  | No  | No  |
| 9138   | ARHGEF1  | Rho guanine nucleotide exchange factor (GEF) 1                                     | 1.65E-07 | Yes | No  | No  | Yes | No  | Yes | Yes |
| 9232   | PTTG1    | pituitary tumor-transforming 1                                                     | 1.66E-07 | No  | No  | Yes | No  | No  | Yes | No  |
| 10569  | SLU7     | SLU7 splicing factor homolog (S. cerevisiae)                                       | 1.66E-07 | No  | No  | Yes | No  | No  | No  | No  |
| 80333  | KCNIP4   | Kv channel interacting protein 4                                                   | 1.67E-07 | No  | No  | No  | Yes | No  | No  | No  |
| 284406 | ZNF545   | zinc finger protein 545                                                            | 1.67E-07 | Yes | No  | Yes | No  | No  | No  | No  |
| 257415 | FAM133B  | family with sequence similarity 133, member B                                      | 1.67E-07 | Yes | No  | No  | No  | Yes | No  | No  |
| 4552   | MTRR     | S-methyltetrahydrofolate-homocysteine methyltransferase reductase                  | 1.68E-07 | No  | No  | No  | Yes | No  | No  | No  |
| 56255  | TXNDC13  | thioredoxin domain containing 13                                                   | 1.68E-07 | Yes | No  | Yes | No  | No  | Yes | No  |
| 535    | ATP6V0A1 | ATPase, H+ transporting, lysosomal V0 subunit a1                                   | 1.68E-07 | Yes | No  | Yes | No  | No  | Yes | Yes |
| 1583   | CYP11A1  | cytochrome P450, family 11, subfamily A, polypeptide 1                             | 1.69E-07 | No  | No  | Yes | No  | No  | No  | No  |
| 5293   | PIK3CD   | phosphoinositide-3-kinase, catalytic, delta polypeptide                            | 1.69E-07 | No  | No  | Yes | No  | No  | No  | No  |
| 222545 | GPRC6A   | G protein-coupled receptor, family C, group 6, member A                            | 1.69E-07 | No  | No  | No  | Yes | No  | No  | No  |
| 659    | BMPR2    | bone morphogenetic protein receptor, type II (serine/threonine kinase)             | 1.70E-07 | Yes | No  | Yes | No  | No  | No  | No  |
| 54507  | ADAMTSL4 | ADAMTS-like 4                                                                      | 1.70E-07 | No  | No  | No  | Yes | No  | No  | No  |
| 5308   | PITX2    | paired-like homeodomain 2                                                          | 1.70E-07 | No  | No  | Yes | No  | No  | No  | No  |
| 1959   | EGR2     | early growth response 2 (Krox-20 homolog, Drosophila)                              | 1.70E-07 | No  | No  | Yes | No  | No  | Yes | No  |
| 64422  | ATG3     | ATG3 autophagy related 3 homolog (S. cerevisiae)                                   | 1.71E-07 | No  | No  | Yes | No  | No  | Yes | No  |
| 149830 | PRNT     | prion protein (testis specific)                                                    | 1.74E-07 | No  | No  | Yes | No  | No  | No  | No  |
| 5702   | PSMC3    | proteasome (prosome, macropain) 26S subunit, ATPase, 3                             | 1.74E-07 | No  | No  | No  | Yes | No  | Yes | No  |
| 3009   | HIST1H1B | histone cluster 1, H1b                                                             | 1.75E-07 | No  | No  | Yes | No  | No  | No  | No  |
| 22933  | SIRT2    | sirtuin (silent mating type information regulation 2 homolog) 2 (S. cerevisiae)    | 1.75E-07 | No  | No  | No  | No  | Yes | No  | No  |
| 4793   | NFKBIB   | nuclear factor of kappa light polypeptide gene enhancer in B-cells inhibitor, beta | 1.75E-07 | No  | No  | No  | No  | Yes | No  | No  |
| 51360  | MBTPS2   | membrane-bound transcription factor peptidase, site 2                              | 1.75E-07 | No  | No  | Yes | No  | No  | No  | No  |
| 65244  | SPATS2   | spermatogenesis associated, serine-rich 2                                          | 1.76E-07 | No  | Yes | Yes | No  | No  | No  | No  |
| 23406  | COTL1    | coactosin-like 1 (Dictyostelium)                                                   | 1.76E-07 | Yes | No  | No  | Yes | No  | No  | No  |
| 126969 | SLC44A3  | solute carrier family 44, member 3                                                 | 1.76E-07 | No  | No  | Yes | No  | No  | No  | No  |
| 22848  | AAK1     | AP2 associated kinase 1                                                            | 1.77E-07 | No  | No  | Yes | No  | No  | No  | No  |
| 55585  | UBE2Q1   | ubiquitin-conjugating enzyme E2Q family member 1                                   | 1.79E-07 | No  | No  | Yes | No  | No  | Yes | No  |
| 9935   | MAFB     | v-maf musculoaponeurotic fibrosarcoma oncogene homolog B (avian)                   | 1.80E-07 | No  | No  | Yes | No  | No  | No  | No  |
| 10598  | AHSA1    | AHA1, activator of heat shock 90kDa protein ATPase homolog 1 (yeast)               | 1.80E-07 | No  | No  | No  | Yes | No  | No  | No  |
| 1183   | CLCN4    | chloride channel 4                                                                 | 1.81E-07 | No  | No  | Yes | No  | No  | No  | No  |
| 4780   | NFE2L2   | nuclear factor (erythroid-derived 2)-like 2                                        | 1.81E-07 | No  | No  | No  | Yes | No  | Yes | Yes |
| 8852   | AKAP4    | A kinase (PRKA) anchor protein 4                                                   | 1.81E-07 | No  | No  | No  | Yes | No  | No  | No  |

|        |          |                                                                                     |          |     |     |     |     |     |     |    |
|--------|----------|-------------------------------------------------------------------------------------|----------|-----|-----|-----|-----|-----|-----|----|
| 10168  | ZNF197   | zinc finger protein 197                                                             | 1.82E-07 | No  | No  | Yes | No  | No  | No  | No |
| 54847  | SID1     | SID1 transmembrane family, member 1                                                 | 1.82E-07 | Yes | Yes | Yes | No  | No  | Yes | No |
| 6400   | SEL1L    | sel-1 suppressor of lin-12-like (C. elegans)                                        | 1.83E-07 | Yes | No  | No  | Yes | No  | No  | No |
| 1946   | EFNA5    | ephrin-A5                                                                           | 1.83E-07 | No  | No  | Yes | No  | No  | No  | No |
| 11257  | TP53AP1  | TP53 activated protein 1                                                            | 1.83E-07 | No  | No  | Yes | No  | No  | No  | No |
| 705    | BYSL     | bystin-like                                                                         | 1.83E-07 | No  | No  | Yes | No  | No  | Yes | No |
| 6196   | RPS6KA2  | ribosomal protein S6 kinase, 90kDa, polypeptide 2                                   | 1.83E-07 | No  | No  | Yes | No  | No  | Yes | No |
| 140809 | SRXN1    | sulfiredoxin 1 homolog (S. cerevisiae)                                              | 1.84E-07 | No  | No  | No  | Yes | No  | No  | No |
| 8208   | CHAF1B   | chromatin assembly factor 1, subunit B (p60)                                        | 1.85E-07 | No  | No  | Yes | No  | No  | No  | No |
| 58190  | CTDSP1   | CTD (carboxy-terminal domain, RNA polymerase II, polypeptide A) small phosphatase 1 | 1.85E-07 | No  | No  | No  | Yes | No  | Yes | No |
| 64844  | MARCH7   | membrane-associated ring finger (C3HC4) 7                                           | 1.87E-07 | No  | No  | No  | Yes | No  | No  | No |
| 80304  | C2orf44  | chromosome 2 open reading frame 44                                                  | 1.89E-07 | No  | No  | No  | Yes | No  | No  | No |
| 4802   | NFYC     | nuclear transcription factor Y, gamma                                               | 1.90E-07 | No  | Yes | Yes | No  | No  | Yes | No |
| 9526   | MPDU1    | mannose-P-dolichol utilization defect 1                                             | 1.90E-07 | No  | No  | No  | No  | No  | No  | No |
| 8548   | BLZF1    | basic leucine zipper nuclear factor 1 (JEM-1)                                       | 1.91E-07 | No  | No  | No  | Yes | No  | Yes | No |
| 60     | ACTB     | actin, beta                                                                         | 1.91E-07 | No  | No  | No  | No  | Yes | No  | No |
| 84281  | MGC13057 | hypothetical protein MGC13057                                                       | 1.92E-07 | No  | Yes | Yes | No  | No  | No  | No |
| 7756   | ZNF207   | zinc finger protein 207                                                             | 1.94E-07 | Yes | No  | Yes | No  | No  | No  | No |
| 80179  | MYO19    | myosin XIX                                                                          | 1.94E-07 | No  | No  | No  | No  | Yes | No  | No |
| 284098 | PIGW     | phosphatidylinositol glycan anchor biosynthesis, class W                            | 1.94E-07 | No  | No  | No  | Yes | No  | No  | No |
| 10449  | ACAA2    | acetyl-Coenzyme A acyltransferase 2                                                 | 1.98E-07 | No  | No  | No  | No  | Yes | No  | No |
| 9055   | PRC1     | protein regulator of cytokinesis 1                                                  | 1.98E-07 | No  | No  | No  | Yes | No  | No  | No |
| 60678  | EEFSEC   | eukaryotic elongation factor, selenocysteine-tRNA-specific                          | 1.98E-07 | No  | No  | No  | No  | No  | No  | No |
| 29881  | NPC1L1   | NPC1 (Niemann-Pick disease, type C1, gene)-like 1                                   | 1.98E-07 | No  | No  | Yes | No  | No  | No  | No |
| 115123 | MARCH3   | membrane-associated ring finger (C3HC4) 3                                           | 1.99E-07 | Yes | No  | Yes | No  | No  | No  | No |
| 2696   | GIPR     | gastric inhibitory polypeptide receptor                                             | 2.00E-07 | No  | No  | No  | Yes | No  | No  | No |
| 5594   | MAPK1    | mitogen-activated protein kinase 1                                                  | 2.00E-07 | Yes | No  | No  | Yes | No  | Yes | No |
| 81622  | UNC93B1  | unc-93 homolog B1 (C. elegans)                                                      | 2.00E-07 | Yes | No  | No  | No  | No  | No  | No |
| 9653   | HS2ST1   | heparan sulfate 2-O-sulfotransferase 1                                              | 2.01E-07 | No  | No  | Yes | No  | No  | Yes | No |
| 905    | CCNT2    | cyclin T2                                                                           | 2.01E-07 | Yes | No  | Yes | No  | No  | No  | No |
| 29767  | TMOD2    | tropomodulin 2 (neuronal)                                                           | 2.02E-07 | No  | No  | Yes | No  | No  | Yes | No |
| 57650  | KIAA1524 | KIAA1524                                                                            | 2.02E-07 | No  | No  | Yes | No  | No  | No  | No |
| 27173  | SLC39A1  | solute carrier family 39 (zinc transporter), member 1                               | 2.03E-07 | No  | No  | Yes | No  | No  | No  | No |
| 85320  | ABCC11   | ATP-binding cassette, sub-family C (CFTR/MRP), member 11                            | 2.03E-07 | No  | No  | Yes | No  | No  | No  | No |

|        |          |                                                                                               |          |     |     |     |     |     |     |    |
|--------|----------|-----------------------------------------------------------------------------------------------|----------|-----|-----|-----|-----|-----|-----|----|
| 55164  | SHQ1     | SHQ1 homolog ( <i>S. cerevisiae</i> )                                                         | 2.04E-07 | No  | No  | No  | Yes | No  | No  | No |
| 5430   | POLR2A   | polymerase (RNA) II (DNA directed) polypeptide A, 220kDa                                      | 2.04E-07 | No  | No  | Yes | No  | No  | Yes | No |
| 650    | BMP2     | bone morphogenetic protein 2                                                                  | 2.09E-07 | Yes | No  | No  | Yes | No  | No  | No |
| 254158 | CXorf58  | chromosome X open reading frame 58                                                            | 2.10E-07 | No  | No  | No  | Yes | No  | No  | No |
| 284325 | C19orf54 | chromosome 19 open reading frame 54                                                           | 2.10E-07 | No  | No  | No  | No  | Yes | Yes | No |
| 115350 | FCRL1    | Fc receptor-like 1                                                                            | 2.11E-07 | Yes | No  | No  | Yes | No  | No  | No |
| 197335 | WDR90    | WD repeat domain 90                                                                           | 2.12E-07 | No  | No  | No  | No  | Yes | No  | No |
| 10988  | METAP2   | methionyl aminopeptidase 2                                                                    | 2.13E-07 | No  | Yes | Yes | No  | No  | No  | No |
| 64067  | NPAS3    | neuronal PAS domain protein 3                                                                 | 2.14E-07 | No  | No  | Yes | No  | No  | No  | No |
| 9632   | SEC24C   | SEC24 related gene family, member C ( <i>S. cerevisiae</i> )                                  | 2.17E-07 | No  | No  | Yes | No  | No  | No  | No |
| 55748  | CNDP2    | CNDP dipeptidase 2 (metallopeptidase M20 family)                                              | 2.18E-07 | No  | No  | Yes | No  | No  | No  | No |
| 1363   | CPE      | carboxypeptidase E                                                                            | 2.18E-07 | Yes | No  | No  | No  | Yes | No  | No |
| 397    | ARHGDI3  | Rho GDP dissociation inhibitor (GDI) beta                                                     | 2.18E-07 | No  | No  | Yes | No  | No  | No  | No |
| 5149   | PDE6H    | phosphodiesterase 6H, cGMP-specific, cone, gamma                                              | 2.18E-07 | No  | No  | Yes | No  | No  | No  | No |
| 4946   | OAZ1     | ornithine decarboxylase antizyme 1                                                            | 2.18E-07 | No  | No  | No  | No  | Yes | No  | No |
| 4794   | NFKBIE   | nuclear factor of kappa light polypeptide gene enhancer in B-cells inhibitor, epsilon         | 2.20E-07 | Yes | Yes | Yes | No  | No  | No  | No |
| 4216   | MAP3K4   | mitogen-activated protein kinase kinase kinase 4                                              | 2.21E-07 | No  | No  | Yes | No  | No  | No  | No |
| 255520 | ELMOD2   | ELMO/CED-12 domain containing 2                                                               | 2.21E-07 | No  | No  | Yes | No  | No  | No  | No |
| 10966  | RAB40B   | RAB40B, member RAS oncogene family                                                            | 2.21E-07 | No  | No  | No  | No  | No  | No  | No |
| 10098  | TSPAN5   | tetraspanin 5                                                                                 | 2.22E-07 | Yes | No  | Yes | No  | No  | No  | No |
| 54882  | ANKHD1   | ankyrin repeat and KH domain containing 1                                                     | 2.22E-07 | No  | No  | Yes | No  | No  | No  | No |
| 7133   | TNFRSF1B | tumor necrosis factor receptor superfamily, member 1B                                         | 2.24E-07 | Yes | No  | Yes | No  | No  | No  | No |
| 154743 | C7orf60  | chromosome 7 open reading frame 60                                                            | 2.26E-07 | No  | No  | Yes | No  | No  | No  | No |
| 53371  | NUP54    | nucleoporin 54kDa                                                                             | 2.26E-07 | No  | No  | Yes | No  | No  | Yes | No |
| 7942   | TFEB     | transcription factor EB                                                                       | 2.27E-07 | Yes | No  | No  | Yes | No  | No  | No |
| 51070  | NOSIP    | nitric oxide synthase interacting protein                                                     | 2.27E-07 | No  | No  | No  | Yes | No  | Yes | No |
| 5639   | PRRG2    | proline rich Gli (G-carboxyglutamic acid) 2                                                   | 2.27E-07 | No  | No  | No  | Yes | No  | No  | No |
| 174    | AFP      | alpha-fetoprotein                                                                             | 2.31E-07 | No  | No  | Yes | No  | No  | No  | No |
| 54619  | CCNJ     | cyclin J                                                                                      | 2.31E-07 | No  | No  | Yes | No  | No  | No  | No |
| 124359 | CDYL2    | chromodomain protein, Y-like 2                                                                | 2.32E-07 | No  | No  | Yes | No  | No  | No  | No |
| 1536   | CYBB     | cytochrome b-245, beta polypeptide (chronic granulomatous disease)                            | 2.34E-07 | No  | No  | Yes | No  | No  | No  | No |
| 580    | BARD1    | BRCA1 associated RING domain 1                                                                | 2.36E-07 | No  | No  | Yes | No  | No  | No  | No |
| 25771  | TBC1D22A | TBC1 domain family, member 22A                                                                | 2.38E-07 | Yes | No  | Yes | No  | No  | Yes | No |
| 846    | CASR     | calcium-sensing receptor (hypocalciuric hypercalcemia 1, severe neonatal hyperparathyroidism) | 2.40E-07 | No  | No  | Yes | No  | No  | No  | No |

|        |          |                                                                                   |          |     |    |     |     |     |     |    |
|--------|----------|-----------------------------------------------------------------------------------|----------|-----|----|-----|-----|-----|-----|----|
| 9920   | KBTBD11  | kelch repeat and BTB (POZ) domain containing 11                                   | 2.44E-07 | No  | No | Yes | No  | No  | No  | No |
| 9689   | BZW1     | basic leucine zipper and W2 domains 1                                             | 2.45E-07 | No  | No | Yes | No  | No  | No  | No |
| 10018  | BCL2L11  | BCL2-like 11 (apoptosis facilitator)                                              | 2.46E-07 | No  | No | Yes | No  | No  | No  | No |
| 400997 | FLJ44006 | hypothetical FLJ44006                                                             | 2.46E-07 | NA  | No | Yes | No  | No  | No  | No |
| 57820  | CCNB1IP1 | cyclin B1 interacting protein 1                                                   | 2.49E-07 | No  | No | No  | Yes | No  | No  | No |
| 51339  | DACT1    | dapper, antagonist of beta-catenin, homolog 1 (Xenopus laevis)                    | 2.51E-07 | Yes | No | Yes | No  | No  | No  | No |
| 4722   | NDUFS3   | NADH dehydrogenase (ubiquinone) Fe-S protein 3, 30kDa (NADH-coenzyme Q reductase) | 2.51E-07 | No  | No | Yes | No  | No  | No  | No |
| 6734   | SRPR     | signal recognition particle receptor (docking protein)                            | 2.52E-07 | No  | No | No  | No  | Yes | No  | No |
| 55572  | FOXRED1  | FAD-dependent oxidoreductase domain containing 1                                  | 2.52E-07 | No  | No | No  | No  | Yes | No  | No |
| 23416  | KCNH3    | potassium voltage-gated channel, subfamily H (eag-related), member 3              | 2.52E-07 | No  | No | No  | No  | No  | No  | No |
| 2776   | GNAQ     | guanine nucleotide binding protein (G protein), q polypeptide                     | 2.56E-07 | Yes | No | No  | Yes | No  | No  | No |
| 8312   | AXIN1    | axin 1                                                                            | 2.60E-07 | Yes | No | Yes | No  | No  | No  | No |
| 57205  | ATP10D   | ATPase, class V, type 10D                                                         | 2.65E-07 | No  | No | Yes | No  | No  | No  | No |
| 1843   | DUSP1    | dual specificity phosphatase 1                                                    | 2.65E-07 | Yes | No | No  | No  | Yes | No  | No |
| 79663  | HSPBAP1  | HSPB (heat shock 27kDa) associated protein 1                                      | 2.66E-07 | Yes | No | Yes | No  | No  | Yes | No |
| 84925  | DIRC2    | disrupted in renal carcinoma 2                                                    | 2.66E-07 | No  | No | Yes | No  | No  | Yes | No |
| 8139   | GAN      | giant axonal neuropathy (gigaxonin)                                               | 2.66E-07 | No  | No | No  | No  | No  | Yes | No |
| 941    | CD80     | CD80 molecule                                                                     | 2.67E-07 | No  | No | Yes | No  | No  | No  | No |
| 54997  | TESC     | tescalcin                                                                         | 2.67E-07 | No  | No | Yes | No  | No  | No  | No |
| 3626   | INHBC    | inhibin, beta C                                                                   | 2.67E-07 | No  | No | No  | Yes | No  | No  | No |
| 23080  | KIAA0241 | KIAA0241                                                                          | 2.67E-07 | Yes | No | Yes | No  | No  | No  | No |
| 23658  | LSM5     | LSM5 homolog, U6 small nuclear RNA associated (S. cerevisiae)                     | 2.67E-07 | No  | No | Yes | No  | No  | No  | No |
| 54665  | RSBN1    | round spermatid basic protein 1                                                   | 2.71E-07 | Yes | No | Yes | No  | No  | No  | No |
| 10979  | FERMT2   | fermitin family homolog 2 (Drosophila)                                            | 2.71E-07 | No  | No | Yes | No  | No  | No  | No |
| 2976   | GTF3C2   | general transcription factor IIC, polypeptide 2, beta 110kDa                      | 2.72E-07 | Yes | No | No  | Yes | No  | No  | No |
| 7444   | VRK2     | vaccinia related kinase 2                                                         | 2.73E-07 | NA  | No | Yes | No  | No  | No  | No |
| 79651  | RHBDF2   | rhomboid 5 homolog 2 (Drosophila)                                                 | 2.75E-07 | No  | No | No  | Yes | No  | No  | No |
| 9631   | NUP155   | nucleoporin 155kDa                                                                | 2.76E-07 | No  | No | Yes | No  | No  | Yes | No |
| 240    | ALOX5    | arachidonate 5-lipoxygenase                                                       | 2.81E-07 | No  | No | Yes | No  | No  | No  | No |
| 55671  | SMEK1    | SMEK homolog 1, suppressor of mek1 (Dictyostelium)                                | 2.83E-07 | No  | No | Yes | No  | No  | No  | No |
| 51092  | SIDT2    | SID1 transmembrane family, member 2                                               | 2.83E-07 | Yes | No | Yes | No  | No  | No  | No |
| 7844   | RNF103   | ring finger protein 103                                                           | 2.84E-07 | No  | No | Yes | No  | No  | No  | No |
| 411    | ARSB     | arylsulfatase B                                                                   | 2.85E-07 | No  | No | No  | No  | Yes | No  | No |
| 3192   | HNRNPU   | heterogeneous nuclear ribonucleoprotein U (scaffold attachment factor A)          | 2.86E-07 | Yes | No | Yes | No  | No  | No  | No |



|        |          |                                                                                  |          |     |    |     |     |     |     |     |
|--------|----------|----------------------------------------------------------------------------------|----------|-----|----|-----|-----|-----|-----|-----|
| 58480  | RHOU     | ras homolog gene family, member U                                                | 2.86E-07 | No  | No | Yes | No  | No  | No  | No  |
| 50863  | HNT      | neurotrophin                                                                     | 2.87E-07 | No  | No | No  | Yes | No  | No  | No  |
| 85450  | KIAA1754 | KIAA1754                                                                         | 2.88E-07 | No  | No | Yes | No  | No  | No  | No  |
| 10333  | TLR6     | toll-like receptor 6                                                             | 2.89E-07 | No  | No | No  | No  | No  | No  | No  |
| 4752   | NEK3     | NIMA (never in mitosis gene a)-related kinase 3                                  | 2.89E-07 | Yes | No | No  | Yes | No  | No  | No  |
| 6654   | SOS1     | son of sevenless homolog 1 (Drosophila)                                          | 2.90E-07 | NA  | No | No  | Yes | No  | No  | No  |
| 8816   | WDR22    | WD repeat domain 22                                                              | 2.90E-07 | Yes | No | Yes | No  | No  | No  | No  |
| 284525 | SLC9A11  | solute carrier family 9, member 11                                               | 2.90E-07 | No  | No | No  | Yes | No  | No  | No  |
| 84124  | ZNF394   | zinc finger protein 394                                                          | 2.91E-07 | Yes | No | Yes | No  | No  | No  | No  |
| 192683 | SCAMP5   | secretory carrier membrane protein 5                                             | 2.91E-07 | No  | No | No  | Yes | No  | No  | No  |
| 8880   | FUBP1    | far upstream element (FUSE) binding protein 1                                    | 2.92E-07 | No  | No | No  | Yes | No  | No  | No  |
| 84641  | HIATL1   | hippocampus abundant transcript-like 1                                           | 2.92E-07 | No  | No | Yes | No  | No  | No  | No  |
| 84872  | ZC3H10   | zinc finger CCCH-type containing 10                                              | 2.92E-07 | No  | No | No  | No  | Yes | Yes | No  |
| 83943  | IMMP2L   | IMP2 inner mitochondrial membrane peptidase-like (S. cerevisiae)                 | 2.93E-07 | No  | No | Yes | No  | No  | No  | No  |
| 253260 | RICTOR   | rapamycin-insensitive companion of mTOR                                          | 2.95E-07 | No  | No | Yes | No  | No  | No  | No  |
| 5862   | RAB2A    | RAB2A, member RAS oncogene family                                                | 2.95E-07 | No  | No | Yes | No  | No  | No  | No  |
| 7582   | ZNF33B   | zinc finger protein 33B                                                          | 2.97E-07 | No  | No | Yes | No  | No  | No  | No  |
| 10175  | CNIH     | cornichon homolog (Drosophila)                                                   | 2.97E-07 | No  | No | Yes | No  | No  | No  | No  |
| 11201  | POLI     | polymerase (DNA directed) iota                                                   | 3.00E-07 | Yes | No | No  | Yes | No  | No  | No  |
| 54718  | BTN2A3   | butyrophilin, subfamily 2, member A3                                             | 3.00E-07 | No  | No | No  | Yes | No  | No  | No  |
| 55173  | MRPS10   | mitochondrial ribosomal protein S10                                              | 3.00E-07 | No  | No | No  | Yes | No  | No  | No  |
| 135152 | B3GAT2   | beta-1,3-glucuronyltransferase 2 (glucuronosyltransferase S)                     | 3.03E-07 | NA  | No | No  | Yes | No  | No  | No  |
| 58513  | EPS15L1  | epidermal growth factor receptor pathway substrate 15-like 1                     | 3.06E-07 | No  | No | No  | No  | Yes | No  | No  |
| 23515  | MORC3    | MORC family CW-type zinc finger 3                                                | 3.09E-07 | Yes | No | Yes | No  | No  | No  | No  |
| 9255   | SCYE1    | small inducible cytokine subfamily E, member 1 (endothelial monocyte-activating) | 3.09E-07 | No  | No | Yes | No  | No  | Yes | No  |
| 93627  | MGC16169 | hypothetical protein MGC16169                                                    | 3.09E-07 | No  | No | Yes | No  | No  | Yes | No  |
| 283    | ANG      | angiogenin, ribonuclease, RNase A family, 5                                      | 3.14E-07 | Yes | No | No  | Yes | No  | Yes | No  |
| 10904  | BLCAP    | bladder cancer associated protein                                                | 3.16E-07 | No  | No | No  | Yes | No  | No  | No  |
| 55359  | STYK1    | serine/threonine/tyrosine kinase 1                                               | 3.16E-07 | No  | No | Yes | No  | No  | No  | No  |
| 9575   | CLOCK    | clock homolog (mouse)                                                            | 3.17E-07 | Yes | No | No  | Yes | No  | Yes | Yes |
| 3454   | IFNAR1   | interferon (alpha, beta and omega) receptor 1                                    | 3.17E-07 | Yes | No | No  | Yes | No  | No  | No  |
| 55015  | PRPF39   | PRP39 pre-mRNA processing factor 39 homolog (S. cerevisiae)                      | 3.17E-07 | No  | No | Yes | No  | No  | Yes | No  |
| 6773   | STAT2    | signal transducer and activator of transcription 2, 113kDa                       | 3.23E-07 | No  | No | Yes | No  | No  | No  | No  |
| 10134  | BCAP31   | B-cell receptor-associated protein 31                                            | 3.24E-07 | Yes | No | No  | No  | No  | No  | No  |

|        |          |                                                                         |          |     |     |     |     |     |     |     |
|--------|----------|-------------------------------------------------------------------------|----------|-----|-----|-----|-----|-----|-----|-----|
| 26103  | LRIT1    | leucine-rich repeat, immunoglobulin-like and transmembrane domains 1    | 3.26E-07 | No  | No  | No  | Yes | No  | No  | No  |
| 4209   | MEF2D    | myocyte enhancer factor 2D                                              | 3.27E-07 | No  | No  | No  | Yes | No  | No  | No  |
| 55110  | MAGOHB   | mago-nashi homolog B (Drosophila)                                       | 3.29E-07 | No  | No  | Yes | No  | No  | No  | No  |
| 55843  | ARHGAP15 | Rho GTPase activating protein 15                                        | 3.31E-07 | Yes | No  | Yes | No  | No  | Yes | No  |
| 8030   | CCDC6    | coiled-coil domain containing 6                                         | 3.32E-07 | No  | No  | Yes | No  | No  | No  | No  |
| 348980 | HCN1     | hyperpolarization activated cyclic nucleotide-gated potassium channel 1 | 3.33E-07 | No  | No  | Yes | No  | No  | No  | No  |
| 51611  | DPH5     | DPH5 homolog (S. cerevisiae)                                            | 3.33E-07 | Yes | Yes | Yes | No  | No  | No  | No  |
| 4830   | NME1     | non-metastatic cells 1, protein (NM23A) expressed in                    | 3.33E-07 | No  | No  | No  | Yes | No  | No  | No  |
| 126433 | FBXO27   | F-box protein 27                                                        | 3.33E-07 | No  | No  | No  | Yes | No  | No  | No  |
| 8522   | GAS7     | growth arrest-specific 7                                                | 3.37E-07 | No  | No  | No  | Yes | No  | No  | No  |
| 51335  | NGRN     | neugrin, neurite outgrowth associated                                   | 3.40E-07 | No  | No  | Yes | No  | No  | No  | No  |
| 9330   | GTF3C3   | general transcription factor IIIc, polypeptide 3, 102kDa                | 3.40E-07 | No  | No  | No  | Yes | No  | No  | No  |
| 6157   | RPL27A   | ribosomal protein L27a                                                  | 3.41E-07 | No  | No  | No  | No  | Yes | No  | No  |
| 8195   | MKKS     | McKusick-Kaufman syndrome                                               | 3.41E-07 | Yes | No  | Yes | No  | No  | No  | No  |
| 389421 | LIN28B   | lin-28 homolog B (C. elegans)                                           | 3.43E-07 | No  | No  | Yes | No  | No  | No  | No  |
| 84668  | FAM126A  | family with sequence similarity 126, member A                           | 3.45E-07 | Yes | No  | Yes | No  | No  | No  | No  |
| 79684  | C11orf61 | chromosome 11 open reading frame 61                                     | 3.46E-07 | No  | No  | Yes | No  | No  | No  | No  |
| 166614 | DCLK2    | doublecortin-like kinase 2                                              | 3.48E-07 | Yes | No  | Yes | No  | No  | No  | No  |
| 3998   | LMAN1    | lectin, mannose-binding, 1                                              | 3.48E-07 | No  | No  | Yes | No  | No  | No  | No  |
| 5806   | PTX3     | pentraxin-related gene, rapidly induced by IL-1 beta                    | 3.53E-07 | No  | No  | Yes | No  | No  | No  | No  |
| 84923  | FAM104A  | family with sequence similarity 104, member A                           | 3.53E-07 | No  | No  | Yes | No  | No  | No  | No  |
| 60682  | SMAP1    | stromal membrane-associated GTPase-activating protein 1                 | 3.53E-07 | No  | No  | No  | Yes | No  | No  | No  |
| 5094   | PCBP2    | poly(rC) binding protein 2                                              | 3.53E-07 | No  | No  | No  | No  | Yes | No  | No  |
| 3575   | IL7R     | interleukin 7 receptor                                                  | 3.53E-07 | Yes | No  | No  | Yes | No  | No  | No  |
| 51720  | UIMC1    | ubiquitin interaction motif containing 1                                | 3.55E-07 | No  | No  | Yes | No  | No  | No  | No  |
| 79898  | ZNF613   | zinc finger protein 613                                                 | 3.56E-07 | NA  | No  | No  | No  | No  | Yes | No  |
| 5689   | PSMB1    | proteasome (prosome, macropain) subunit, beta type, 1                   | 3.59E-07 | No  | No  | Yes | No  | No  | No  | No  |
| 677    | ZFP36L1  | zinc finger protein 36, C3H type-like 1                                 | 3.60E-07 | Yes | No  | Yes | No  | No  | Yes | Yes |
| 4242   | MFNG     | MFNG O-fucosylpeptide 3-beta-N-acetylglucosaminyltransferase            | 3.60E-07 | No  | No  | No  | Yes | No  | No  | No  |
| 80124  | VCIPI1   | valosin containing protein (p97)/p47 complex interacting protein 1      | 3.62E-07 | No  | No  | Yes | No  | No  | Yes | No  |
| 25996  | REXO2    | REX2, RNA exonuclease 2 homolog (S. cerevisiae)                         | 3.63E-07 | No  | No  | Yes | No  | No  | No  | No  |
| 60558  | GUF1     | GUF1 GTPase homolog (S. cerevisiae)                                     | 3.68E-07 | No  | No  | Yes | No  | No  | No  | No  |
| 3146   | HMG1     | high-mobility group box 1                                               | 3.70E-07 | No  | No  | Yes | No  | No  | Yes | No  |
| 390075 | OR52N5   | olfactory receptor, family 52, subfamily N, member 5                    | 3.71E-07 | NA  | No  | Yes | No  | No  | No  | No  |

|        |           |                                                                         |          |     |     |     |     |     |     |    |
|--------|-----------|-------------------------------------------------------------------------|----------|-----|-----|-----|-----|-----|-----|----|
| 36     | ACADSB    | acyl-Coenzyme A dehydrogenase, short/branched chain                     | 3.73E-07 | Yes | No  | No  | Yes | No  | No  | No |
| 84844  | PHF5A     | PHD finger protein 5A                                                   | 3.76E-07 | No  | No  | Yes | No  | No  | No  | No |
| 50     | ACO2      | aconitase 2, mitochondrial                                              | 3.76E-07 | No  | No  | Yes | No  | No  | No  | No |
| 3796   | KIF2A     | kinesin heavy chain member 2A                                           | 3.79E-07 | No  | No  | No  | Yes | No  | No  | No |
| 10054  | UBA2      | ubiquitin-like modifier activating enzyme 2                             | 3.80E-07 | No  | No  | Yes | No  | No  | No  | No |
| 9646   | CTR9      | Ctr9, Paf1/RNA polymerase II complex component, homolog (S. cerevisiae) | 3.80E-07 | Yes | No  | Yes | No  | No  | No  | No |
| 10664  | CTCF      | CCCTC-binding factor (zinc finger protein)                              | 3.81E-07 | No  | No  | Yes | No  | No  | No  | No |
| 50484  | RRM2B     | ribonucleotide reductase M2 B (TP53 inducible)                          | 3.85E-07 | No  | No  | No  | Yes | No  | Yes | No |
| 9785   | DHX38     | DEAH (Asp-Glu-Ala-His) box polypeptide 38                               | 3.87E-07 | No  | No  | No  | No  | Yes | No  | No |
| 402665 | LOC402665 | hCG 1651476                                                             | 3.89E-07 | NA  | No  | Yes | No  | No  | No  | No |
| 9669   | EIF5B     | eukaryotic translation initiation factor 5B                             | 3.90E-07 | Yes | No  | Yes | No  | No  | Yes | No |
| 10190  | TXNDC9    | thioredoxin domain containing 9                                         | 3.90E-07 | No  | No  | Yes | No  | No  | Yes | No |
| 1725   | DHPS      | deoxyhypusine synthase                                                  | 3.90E-07 | No  | No  | Yes | No  | No  | No  | No |
| 6832   | SUPV3L1   | suppressor of var1, 3-like 1 (S. cerevisiae)                            | 3.91E-07 | No  | No  | No  | Yes | No  | Yes | No |
| 23786  | BCL2L13   | BCL2-like 13 (apoptosis facilitator)                                    | 3.94E-07 | No  | No  | No  | No  | No  | No  | No |
| 55609  | ZNF280C   | zinc finger protein 280C                                                | 3.94E-07 | No  | No  | Yes | No  | No  | No  | No |
| 2029   | ENSA      | endosulfine alpha                                                       | 3.95E-07 | No  | No  | No  | No  | No  | No  | No |
| 93134  | ZNF561    | zinc finger protein 561                                                 | 4.01E-07 | Yes | No  | Yes | No  | No  | No  | No |
| 51744  | CD244     | CD244 molecule, natural killer cell receptor 2B4                        | 4.05E-07 | No  | No  | Yes | No  | No  | No  | No |
| 1659   | DHX8      | DEAH (Asp-Glu-Ala-His) box polypeptide 8                                | 4.07E-07 | No  | No  | Yes | No  | No  | No  | No |
| 134553 | C5orf24   | chromosome 5 open reading frame 24                                      | 4.08E-07 | No  | Yes | Yes | No  | No  | No  | No |
| 3936   | LCP1      | lymphocyte cytosolic protein 1 (L-plastin)                              | 4.09E-07 | No  | No  | Yes | No  | No  | No  | No |
| 25914  | RTTN      | rotatin                                                                 | 4.09E-07 | No  | No  | No  | Yes | No  | Yes | No |
| 10748  | KLRA1     | killer cell lectin-like receptor subfamily A, member 1                  | 4.09E-07 | No  | No  | No  | Yes | No  | No  | No |
| 170302 | ARX       | aristales related homeobox                                              | 4.09E-07 | Yes | No  | Yes | No  | No  | No  | No |
| 5989   | RFX1      | regulatory factor X, 1 (influences HLA class II expression)             | 4.11E-07 | Yes | No  | Yes | No  | No  | No  | No |
| 4087   | SMAD2     | SMAD family member 2                                                    | 4.14E-07 | No  | No  | Yes | No  | No  | No  | No |
| 80212  | CCDC92    | coiled-coil domain containing 92                                        | 4.15E-07 | No  | No  | Yes | No  | No  | No  | No |
| 133022 | TRAM1L1   | translocation associated membrane protein 1-like 1                      | 4.15E-07 | No  | No  | Yes | No  | No  | No  | No |
| 29942  | PURG      | purine-rich element binding protein G                                   | 4.15E-07 | No  | No  | No  | No  | Yes | Yes | No |
| 5993   | RFX5      | regulatory factor X, 5 (influences HLA class II expression)             | 4.15E-07 | No  | No  | Yes | No  | No  | No  | No |
| 169026 | SLC30A8   | solute carrier family 30 (zinc transporter), member 8                   | 4.18E-07 | No  | No  | No  | Yes | No  | No  | No |
| 171017 | ZNF384    | zinc finger protein 384                                                 | 4.18E-07 | No  | No  | Yes | No  | No  | No  | No |
| 372    | ARCN1     | archain 1                                                               | 4.20E-07 | No  | No  | Yes | No  | No  | No  | No |

|        |           |                                                                        |          |     |     |     |     |     |     |     |
|--------|-----------|------------------------------------------------------------------------|----------|-----|-----|-----|-----|-----|-----|-----|
| 27257  | LSM1      | LSM1 homolog, U6 small nuclear RNA associated (S. cerevisiae)          | 4.21E-07 | No  | No  | No  | Yes | No  | Yes | No  |
| 911    | CD1C      | CD1c molecule                                                          | 4.21E-07 | Yes | No  | No  | No  | No  | No  | No  |
| 29103  | DNAJC15   | DnaJ (Hsp40) homolog, subfamily C, member 15                           | 4.24E-07 | No  | No  | No  | No  | Yes | No  | No  |
| 80174  | DBF4B     | DBF4 homolog B (S. cerevisiae)                                         | 4.25E-07 | No  | No  | Yes | No  | No  | Yes | No  |
| 51735  | RAPGEF6   | Rap guanine nucleotide exchange factor (GEF) 6                         | 4.28E-07 | No  | No  | Yes | No  | No  | No  | No  |
| 151525 | WDSUB1    | WD repeat, sterile alpha motif and U-box domain containing 1           | 4.28E-07 | Yes | No  | Yes | No  | No  | No  | No  |
| 117178 | SSX2IP    | synovial sarcoma, X breakpoint 2 interacting protein                   | 4.28E-07 | No  | No  | Yes | No  | No  | Yes | No  |
| 56768  | NGLY1     | N-glycanase 1                                                          | 4.31E-07 | No  | No  | No  | No  | Yes | Yes | No  |
| 10447  | FAM3C     | family with sequence similarity 3, member C                            | 4.32E-07 | No  | No  | Yes | No  | No  | No  | No  |
| 55505  | NOLA3     | nucleolar protein family A, member 3 (H/ACA small nucleolar RNPs)      | 4.32E-07 | No  | No  | Yes | No  | No  | No  | No  |
| 388272 | C16orf87  | chromosome 16 open reading frame 87                                    | 4.33E-07 | No  | No  | Yes | No  | No  | No  | No  |
| 2018   | EMX2      | empty spiracles homeobox 2                                             | 4.33E-07 | No  | No  | No  | Yes | No  | No  | No  |
| 285636 | LOC285636 | hypothetical protein LOC285636                                         | 4.33E-07 | No  | No  | Yes | No  | No  | No  | No  |
| 9517   | SPTLC2    | serine palmitoyltransferase, long chain base subunit 2                 | 4.34E-07 | Yes | No  | Yes | No  | No  | No  | No  |
| 56097  | PCDHGC5   | protocadherin gamma subfamily C, 5                                     | 4.35E-07 | No  | No  | No  | Yes | No  | No  | No  |
| 4144   | MAT2A     | methionine adenosyltransferase II, alpha                               | 4.37E-07 | No  | No  | Yes | No  | No  | No  | No  |
| 5298   | PI4KB     | phosphatidylinositol 4-kinase, catalytic, beta                         | 4.37E-07 | Yes | No  | Yes | No  | No  | Yes | Yes |
| 143888 | KDEL2     | KDEL (Lys-Asp-Glu-Leu) containing 2                                    | 4.37E-07 | No  | No  | Yes | No  | No  | No  | No  |
| 79930  | DOK3      | docking protein 3                                                      | 4.40E-07 | Yes | No  | No  | Yes | No  | No  | No  |
| 79862  | ZNF669    | zinc finger protein 669                                                | 4.40E-07 | No  | Yes | Yes | No  | No  | No  | No  |
| 1182   | CLCN3     | chloride channel 3                                                     | 4.41E-07 | No  | No  | Yes | No  | No  | Yes | No  |
| 4750   | NEK1      | NIMA (never in mitosis gene a)-related kinase 1                        | 4.41E-07 | No  | No  | Yes | No  | No  | No  | No  |
| 7014   | TERF2     | telomeric repeat binding factor 2                                      | 4.43E-07 | No  | No  | No  | Yes | No  | No  | No  |
| 143187 | VT1A      | vesicle transport through interaction with t-SNAREs homolog 1A (yeast) | 4.44E-07 | Yes | No  | No  | No  | Yes | Yes | No  |
| 64429  | ZDHHC6    | zinc finger, DHHC-type containing 6                                    | 4.44E-07 | No  | No  | No  | No  | Yes | Yes | No  |
| 284611 | FAM102B   | family with sequence similarity 102, member B                          | 4.45E-07 | No  | No  | Yes | No  | No  | No  | No  |
| 79974  | C7orf58   | chromosome 7 open reading frame 58                                     | 4.46E-07 | Yes | No  | No  | No  | Yes | No  | No  |
| 5700   | PSMC1     | proteasome (prosome, macropain) 26S subunit, ATPase, 1                 | 4.47E-07 | No  | No  | Yes | No  | No  | No  | No  |
| 57708  | MIER1     | mesoderm induction early response 1 homolog (Xenopus laevis)           | 4.47E-07 | No  | No  | Yes | No  | No  | No  | No  |
| 3792   | KEL       | Kell blood group, metallo-endopeptidase                                | 4.48E-07 | No  | No  | No  | Yes | No  | No  | No  |
| 55028  | C17orf80  | chromosome 17 open reading frame 80                                    | 4.51E-07 | No  | No  | Yes | No  | No  | No  | No  |
| 5028   | P2RY1     | purinergic receptor P2Y, G-protein coupled, 1                          | 4.51E-07 | No  | No  | Yes | No  | No  | No  | No  |
| 402415 | XKRX      | XK, Kell blood group complex subunit-related, X-linked                 | 4.52E-07 | No  | No  | No  | Yes | No  | No  | No  |
| 5147   | PDE6D     | phosphodiesterase 6D, cGMP-specific, rod, delta                        | 4.54E-07 | No  | No  | Yes | No  | No  | No  | No  |

|        |          |                                                                     |          |     |     |     |     |     |     |     |
|--------|----------|---------------------------------------------------------------------|----------|-----|-----|-----|-----|-----|-----|-----|
| 64708  | COPS7B   | COP9 constitutive photomorphogenic homolog subunit 7B (Arabidopsis) | 4.54E-07 | No  | No  | Yes | No  | No  | No  | No  |
| 1847   | DUSP5    | dual specificity phosphatase 5                                      | 4.55E-07 | Yes | No  | No  | No  | Yes | Yes | No  |
| 1409   | CRYAA    | crystallin, alpha A                                                 | 4.55E-07 | No  |
| 51773  | RSF1     | remodeling and spacing factor 1                                     | 4.56E-07 | Yes | No  | Yes | No  | No  | No  | No  |
| 55743  | CHFR     | checkpoint with forkhead and ring finger domains                    | 4.57E-07 | No  | No  | Yes | No  | No  | No  | No  |
| 89796  | NAV1     | neuron navigator 1                                                  | 4.58E-07 | Yes | No  | No  | No  | Yes | No  | No  |
| 63925  | ZNF335   | zinc finger protein 335                                             | 4.63E-07 | No  | No  | Yes | No  | No  | Yes | No  |
| 80306  | MED28    | mediator complex subunit 28                                         | 4.66E-07 | No  | No  | Yes | No  | No  | No  | No  |
| 85403  | EAF1     | ELL associated factor 1                                             | 4.67E-07 | No  | No  | No  | No  | Yes | No  | No  |
| 27347  | STK39    | serine threonine kinase 39 (STE20/SPS1 homolog, yeast)              | 4.68E-07 | No  | No  | Yes | No  | No  | No  | No  |
| 864    | RUNX3    | runt-related transcription factor 3                                 | 4.69E-07 | Yes | No  | Yes | No  | No  | No  | No  |
| 55704  | CCDC88A  | coiled-coil domain containing 88A                                   | 4.70E-07 | No  | Yes | No  | Yes | No  | No  | No  |
| 8495   | PPFIBP2  | PTPRF interacting protein, binding protein 2 (Iiprin beta 2)        | 4.70E-07 | Yes | No  | No  | Yes | No  | Yes | No  |
| 441381 | LRRC24   | leucine rich repeat containing 24                                   | 4.70E-07 | No  |
| 662    | BNIP1    | BCL2/adenovirus E1B 19kDa interacting protein 1                     | 4.71E-07 | No  |
| 2308   | FOXO1    | forkhead box O1                                                     | 4.71E-07 | Yes | No  | No  | No  | Yes | Yes | Yes |
| 9797   | TATDN2   | TatD DNase domain containing 2                                      | 4.71E-07 | No  | No  | No  | No  | Yes | No  | No  |
| 92565  | FANK1    | fibronectin type III and ankyrin repeat domains 1                   | 4.75E-07 | No  | No  | No  | Yes | No  | No  | No  |
| 9261   | MAPKAPK2 | mitogen-activated protein kinase-activated protein kinase 2         | 4.79E-07 | No  | No  | Yes | No  | No  | No  | No  |
| 23261  | CAMTA1   | calmodulin binding transcription activator 1                        | 4.85E-07 | No  | No  | No  | No  | Yes | No  | No  |
| 51614  | ERGIC3   | ERGIC and golgi 3                                                   | 4.87E-07 | No  | No  | No  | Yes | No  | No  | No  |
| 26135  | SERBP1   | SERPINE1 mRNA binding protein 1                                     | 4.87E-07 | No  | No  | Yes | No  | No  | Yes | No  |
| 27436  | EML4     | echinoderm microtubule associated protein like 4                    | 4.87E-07 | Yes | No  | Yes | No  | No  | No  | No  |
| 11007  | CCDC85B  | coiled-coil domain containing 85B                                   | 4.87E-07 | Yes | No  | Yes | No  | No  | Yes | Yes |
| 9158   | FIBP     | fibroblast growth factor (acidic) intracellular binding protein     | 4.87E-07 | No  | No  | Yes | No  | No  | Yes | No  |
| 6048   | RNF5     | ring finger protein 5                                               | 4.91E-07 | No  | No  | No  | Yes | No  | No  | No  |
| 23541  | SEC14L2  | SEC14-like 2 (S. cerevisiae)                                        | 4.92E-07 | No  | No  | No  | Yes | No  | Yes | No  |
| 1596   | CYP51A1  | cytochrome P450, family 51, subfamily A, polypeptide 1              | 4.92E-07 | No  | No  | No  | Yes | No  | No  | No  |
| 53340  | SPA17    | sperm autoantigenic protein 17                                      | 4.95E-07 | No  | No  | Yes | No  | No  | No  | No  |
| 2902   | GRIN1    | glutamate receptor, ionotropic, N-methyl D-aspartate 1              | 4.95E-07 | No  |
| 4528   | MTIF2    | mitochondrial translational initiation factor 2                     | 5.00E-07 | No  | No  | Yes | No  | No  | No  | No  |
| 7692   | ZNF133   | zinc finger protein 133                                             | 5.02E-07 | Yes | No  | Yes | No  | No  | No  | No  |
| 26127  | FGFR1OP2 | FGFR1 oncogene partner 2                                            | 5.02E-07 | No  | No  | Yes | No  | No  | No  | No  |
| 7549   | ZNF2     | zinc finger protein 2                                               | 5.02E-07 | No  | No  | Yes | No  | No  | Yes | No  |

|        |         |                                                                              |          |     |     |     |     |     |     |     |
|--------|---------|------------------------------------------------------------------------------|----------|-----|-----|-----|-----|-----|-----|-----|
| 84874  | ZNF514  | zinc finger protein 514                                                      | 5.02E-07 | No  | No  | Yes | No  | No  | No  | No  |
| 4324   | MMP15   | matrix metalloproteinase 15 (membrane-inserted)                              | 5.05E-07 | No  | No  | No  | Yes | No  | No  | No  |
| 8842   | PROM1   | prominin 1                                                                   | 5.07E-07 | No  | No  | Yes | No  | No  | No  | No  |
| 22926  | ATF6    | activating transcription factor 6                                            | 5.12E-07 | Yes | No  | No  | Yes | No  | Yes | No  |
| 10097  | ACTR2   | ARP2 actin-related protein 2 homolog (yeast)                                 | 5.12E-07 | No  | No  | Yes | No  | No  | No  | No  |
| 5412   | UBL3    | ubiquitin-like 3                                                             | 5.14E-07 | Yes | No  | Yes | No  | No  | No  | No  |
| 203260 | CCDC107 | coiled-coil domain containing 107                                            | 5.15E-07 | No  | No  | Yes | No  | No  | No  | No  |
| 27240  | SIT1    | signaling threshold regulating transmembrane adaptor 1                       | 5.15E-07 | No  | No  | Yes | No  | No  | No  | No  |
| 84456  | L3MBTL3 | l(3)mbt-like 3 (Drosophila)                                                  | 5.17E-07 | Yes | No  | Yes | No  | No  | No  | No  |
| 7155   | TOP2B   | topoisomerase (DNA) II beta 180kDa                                           | 5.20E-07 | No  | No  | Yes | No  | No  | Yes | No  |
| 79585  | CORO7   | coronin 7                                                                    | 5.22E-07 | No  | No  | Yes | No  | No  | No  | No  |
| 6921   | TCEB1   | transcription elongation factor B (SIII), polypeptide 1 (15kDa, elongin C)   | 5.23E-07 | No  | No  | No  | Yes | No  | No  | No  |
| 54968  | TMEM70  | transmembrane protein 70                                                     | 5.23E-07 | No  | No  | No  | Yes | No  | No  | No  |
| 5531   | PPP4C   | protein phosphatase 4 (formerly X), catalytic subunit                        | 5.23E-07 | No  | No  | Yes | No  | No  | No  | No  |
| 137209 | ZNF572  | zinc finger protein 572                                                      | 5.26E-07 | No  | No  | Yes | No  | No  | No  | No  |
| 345778 | MTX3    | metaxin 3                                                                    | 5.29E-07 | Yes | No  | Yes | No  | No  | No  | No  |
| 8667   | EIF3H   | eukaryotic translation initiation factor 3, subunit H                        | 5.31E-07 | No  | No  | Yes | No  | No  | No  | No  |
| 54331  | GNG2    | guanine nucleotide binding protein (G protein), gamma 2                      | 5.32E-07 | No  | No  | Yes | No  | No  | No  | No  |
| 5977   | DPF2    | D4, zinc and double PHD fingers family 2                                     | 5.42E-07 | No  | No  | No  | Yes | No  | No  | No  |
| 9817   | KEAP1   | kelch-like ECH-associated protein 1                                          | 5.42E-07 | No  | No  | Yes | No  | No  | No  | No  |
| 4693   | NDP     | Norrie disease (pseudoglioma)                                                | 5.42E-07 | No  | No  | Yes | No  | No  | No  | No  |
| 55650  | PIGV    | phosphatidylinositol glycan anchor biosynthesis, class V                     | 5.43E-07 | No  | No  | No  | Yes | No  | No  | No  |
| 10420  | TESK2   | testis-specific kinase 2                                                     | 5.44E-07 | No  | No  | Yes | No  | No  | No  | No  |
| 25974  | MMACHC  | methylmalonic aciduria (cobalamin deficiency) cblC type, with homocystinuria | 5.44E-07 | No  | No  | Yes | No  | No  | No  | No  |
| 57142  | RTN4    | reticulon 4                                                                  | 5.49E-07 | Yes | Yes | Yes | No  | No  | No  | No  |
| 441639 | OR9K2   | olfactory receptor, family 9, subfamily K, member 2                          | 5.53E-07 | NA  | No  | Yes | No  | No  | No  | No  |
| 23626  | SPO11   | SPO11 meiotic protein covalently bound to DSB homolog (S. cerevisiae)        | 5.54E-07 | No  | No  | No  | No  | Yes | No  | No  |
| 25921  | ZDHHC5  | zinc finger, DHHC-type containing 5                                          | 5.54E-07 | No  | No  | Yes | No  | No  | No  | No  |
| 145942 | TMCO5A  | transmembrane and coiled-coil domains 5A                                     | 5.55E-07 | Yes | No  | Yes | No  | No  | No  | No  |
| 1890   | TYMP    | thymidine phosphorylase                                                      | 5.57E-07 | Yes | No  | No  | No  | No  | Yes | Yes |
| 10     | NAT2    | N-acetyltransferase 2 (arylamine N-acetyltransferase)                        | 5.63E-07 | Yes | No  | No  | No  | No  | No  | No  |
| 79088  | ZNF426  | zinc finger protein 426                                                      | 5.71E-07 | Yes | No  | Yes | No  | No  | No  | No  |
| 55319  | C4orf43 | chromosome 4 open reading frame 43                                           | 5.71E-07 | No  | No  | No  | Yes | No  | Yes | No  |
| 284066 | NEK8    | NIMA (never in mitosis gene a)- related kinase 8                             | 5.73E-07 | No  | No  | No  | Yes | No  | Yes | No  |

|        |          |                                                                                                |          |     |     |     |     |     |     |    |
|--------|----------|------------------------------------------------------------------------------------------------|----------|-----|-----|-----|-----|-----|-----|----|
| 6430   | SFRS5    | splicing factor, arginine/serine-rich 5                                                        | 5.75E-07 | No  | No  | Yes | No  | No  | No  | No |
| 197258 | FUK      | fucokinase                                                                                     | 5.75E-07 | No  | No  | Yes | No  | No  | No  | No |
| 55785  | FGD6     | FYVE, RhoGEF and PH domain containing 6                                                        | 5.81E-07 | No  | No  | Yes | No  | No  | No  | No |
| 79750  | ZNF385D  | zinc finger protein 385D                                                                       | 5.82E-07 | Yes | No  | Yes | No  | No  | No  | No |
| 1808   | DPYSL2   | dihydropyrimidinase-like 2                                                                     | 5.83E-07 | No  | No  | No  | No  | Yes | No  | No |
| 51535  | PHLN1    | periplin 1                                                                                     | 5.88E-07 | No  | No  | No  | Yes | No  | Yes | No |
| 9683   | N4BP1    | NEDD4 binding protein 1                                                                        | 5.88E-07 | No  | No  | No  | No  | No  | Yes | No |
| 10240  | MRPS31   | mitochondrial ribosomal protein S31                                                            | 5.88E-07 | No  | No  | No  | Yes | No  | Yes | No |
| 4238   | MFAP3    | microfibrillar-associated protein 3                                                            | 5.89E-07 | No  | No  | Yes | No  | No  | Yes | No |
| 10201  | NME6     | non-metastatic cells 6, protein expressed in (nucleoside-diphosphate kinase)                   | 5.91E-07 | No  | No  | No  | Yes | No  | No  | No |
| 808    | CALM3    | calmodulin 3 (phosphorylase kinase, delta)                                                     | 5.99E-07 | No  | No  | No  | No  | Yes | No  | No |
| 10350  | ABCA9    | ATP-binding cassette, sub-family A (ABC1), member 9                                            | 5.99E-07 | No  | No  | Yes | No  | No  | No  | No |
| 55197  | P15RS    | cyclin-dependent kinase 2B-inhibitor-related protein                                           | 6.01E-07 | Yes | Yes | Yes | No  | No  | No  | No |
| 80817  | KIAA1712 | KIAA1712                                                                                       | 6.02E-07 | No  | No  | Yes | No  | No  | Yes | No |
| 10393  | ANAPC10  | anaphase promoting complex subunit 10                                                          | 6.04E-07 | No  | Yes | No  | Yes | No  | Yes | No |
| 51593  | ARS2     | arsenate resistance protein 2                                                                  | 6.05E-07 | Yes | No  | No  | Yes | No  | No  | No |
| 55754  | TMEM30A  | transmembrane protein 30A                                                                      | 6.05E-07 | No  | No  | Yes | No  | No  | No  | No |
| 1983   | EIF5     | eukaryotic translation initiation factor 5                                                     | 6.06E-07 | Yes | No  | No  | Yes | No  | No  | No |
| 9662   | CEP135   | centrosomal protein 135kDa                                                                     | 6.08E-07 | No  | Yes | No  | No  | No  | No  | No |
| 158747 | MOSPD2   | motile sperm domain containing 2                                                               | 6.09E-07 | No  | No  | No  | Yes | No  | No  | No |
| 23582  | CCNDBP1  | cyclin D-type binding-protein 1                                                                | 6.09E-07 | No  | No  | No  | No  | No  | No  | No |
| 665    | BNIP3L   | BCL2/adenovirus E1B 19kDa interacting protein 3-like                                           | 6.11E-07 | No  | No  | Yes | No  | No  | No  | No |
| 10531  | PITRM1   | pitriysin metalloproteinase 1                                                                  | 6.12E-07 | No  | No  | Yes | No  | No  | No  | No |
| 81624  | DIAPH3   | diaphanous homolog 3 (Drosophila)                                                              | 6.13E-07 | No  | No  | No  | Yes | No  | No  | No |
| 89857  | KLHL6    | kelch-like 6 (Drosophila)                                                                      | 6.13E-07 | No  | Yes | No  | Yes | No  | No  | No |
| 10605  | PAIP1    | poly(A) binding protein interacting protein 1                                                  | 6.14E-07 | No  | No  | Yes | No  | No  | Yes | No |
| 5937   | RBMS1    | RNA binding motif, single stranded interacting protein 1                                       | 6.16E-07 | Yes | No  | Yes | No  | No  | No  | No |
| 292    | SLC25A5  | solute carrier family 25 (mitochondrial carrier, adenine nucleotide translocator), member 5    | 6.19E-07 | No  | No  | No  | Yes | No  | No  | No |
| 196264 | MPZL3    | myelin protein zero-like 3                                                                     | 6.21E-07 | NA  | No  | No  | Yes | No  | No  | No |
| 55254  | TMEM39A  | transmembrane protein 39A                                                                      | 6.22E-07 | Yes | Yes | No  | No  | No  | No  | No |
| 8693   | GALNT4   | UDP-N-acetyl-alpha-D-galactosamine:polypeptide N-acetylgalactosaminyltransferase 4 (GalNAc-T4) | 6.24E-07 | No  | No  | Yes | No  | No  | No  | No |
| 1452   | CSNK1A1  | casein kinase 1, alpha 1                                                                       | 6.25E-07 | No  | Yes | No  | Yes | No  | Yes | No |
| 84858  | ZNF503   | zinc finger protein 503                                                                        | 6.25E-07 | No  | No  | Yes | No  | No  | Yes | No |
| 53938  | PPIL3    | peptidylprolyl isomerase (cyclophilin)-like 3                                                  | 6.29E-07 | No  | No  | No  | No  | No  | No  | No |

|        |           |                                                                                            |          |     |     |     |     |     |     |     |
|--------|-----------|--------------------------------------------------------------------------------------------|----------|-----|-----|-----|-----|-----|-----|-----|
| 4726   | NDUFS6    | NADH dehydrogenase (ubiquinone) Fe-S protein 6, 13kDa (NADH-coenzyme Q reductase)          | 6.29E-07 | No  | No  | Yes | No  | No  | Yes | No  |
| 64979  | MRPL36    | mitochondrial ribosomal protein L36                                                        | 6.29E-07 | No  | No  | Yes | No  | No  | Yes | No  |
| 55761  | TTC17     | tetratricopeptide repeat domain 17                                                         | 6.29E-07 | No  | No  | No  | Yes | No  | No  | No  |
| 2332   | FMR1      | fragile X mental retardation 1                                                             | 6.30E-07 | No  | No  | Yes | No  | No  | No  | No  |
| 9705   | ST18      | suppression of tumorigenicity 18 (breast carcinoma) (zinc finger protein)                  | 6.33E-07 | No  | No  | Yes | No  | No  | No  | No  |
| 84280  | BTBD10    | BTB (POZ) domain containing 10                                                             | 6.35E-07 | No  | No  | Yes | No  | No  | No  | No  |
| 57343  | ZNF304    | zinc finger protein 304                                                                    | 6.37E-07 | Yes | No  | Yes | No  | No  | Yes | No  |
| 339302 | CPLX4     | complexin 4                                                                                | 6.37E-07 | NA  | No  | No  | Yes | No  | No  | No  |
| 51194  | IPO11     | importin 11                                                                                | 6.39E-07 | No  | No  | Yes | No  | No  | Yes | No  |
| 27292  | DIMT1L    | DIM1 dimethyladenosine transferase 1-like (S. cerevisiae)                                  | 6.39E-07 | No  | No  | Yes | No  | No  | No  | No  |
| 150771 | KIAA1754L | KIAA1754-like                                                                              | 6.39E-07 | No  | No  | Yes | No  | No  | No  | No  |
| 23308  | ICOSLG    | inducible T-cell co-stimulator ligand                                                      | 6.40E-07 | Yes | No  | Yes | No  | No  | No  | No  |
| 9439   | MED23     | mediator complex subunit 23                                                                | 6.48E-07 | No  | No  | Yes | No  | No  | Yes | No  |
| 55796  | MBNL3     | muscleblind-like 3 (Drosophila)                                                            | 6.48E-07 | No  | No  | Yes | No  | No  | No  | No  |
| 220972 | MARCH8    | membrane-associated ring finger (C3HC4) 8                                                  | 6.48E-07 | No  | No  | Yes | No  | No  | No  | No  |
| 80173  | IFT74     | intraflagellar transport 74 homolog (Chlamydomonas)                                        | 6.52E-07 | No  | No  | Yes | No  | No  | No  | No  |
| 9373   | PLAA      | phospholipase A2-activating protein                                                        | 6.52E-07 | No  | No  | Yes | No  | No  | No  | No  |
| 51586  | MED15     | mediator complex subunit 15                                                                | 6.56E-07 | No  | No  | No  | Yes | No  | No  | No  |
| 25940  | FAM98A    | family with sequence similarity 98, member A                                               | 6.59E-07 | Yes | No  | Yes | No  | No  | No  | No  |
| 205327 | FLJ38973  | hypothetical protein FLJ38973                                                              | 6.60E-07 | No  | No  | Yes | No  | No  | No  | No  |
| 6520   | SLC3A2    | solute carrier family 3 (activators of dibasic and neutral amino acid transport), member 2 | 6.60E-07 | No  | No  | Yes | No  | No  | Yes | Yes |
| 9303   | SNORD25   | small nucleolar RNA, C/D box 25                                                            | 6.60E-07 | NA  | No  | Yes | No  | No  | No  | No  |
| 79595  | SAP130    | Sin3A-associated protein, 130kDa                                                           | 6.60E-07 | No  | No  | No  | Yes | No  | No  | No  |
| 4664   | NAB1      | NGF1-A binding protein 1 (EGR1 binding protein 1)                                          | 6.61E-07 | No  | No  | No  | Yes | No  | No  | No  |
| 9482   | STX8      | syntaxin 8                                                                                 | 6.63E-07 | No  | No  | Yes | No  | No  | Yes | No  |
| 5879   | RAC1      | ras-related C3 botulinum toxin substrate 1 (rho family, small GTP binding protein Ract)    | 6.64E-07 | No  | No  | No  | No  | Yes | No  | No  |
| 6503   | SLA       | Src-like-adaptor                                                                           | 6.67E-07 | Yes | No  | No  | No  | No  | No  | No  |
| 286    | ANK1      | ankyrin 1, erythrocytic                                                                    | 6.70E-07 | No  | No  | Yes | No  | No  | No  | No  |
| 23020  | ASCC3L1   | activating signal cointegrator 1 complex subunit 3-like 1                                  | 6.75E-07 | No  | No  | Yes | No  | No  | Yes | No  |
| 6932   | TCF7      | transcription factor 7 (T-cell specific, HMG-box)                                          | 6.77E-07 | No  |
| 199223 | TTC21A    | tetratricopeptide repeat domain 21A                                                        | 6.78E-07 | No  | No  | Yes | No  | No  | No  | No  |
| 1024   | CDK8      | cyclin-dependent kinase 8                                                                  | 6.80E-07 | Yes | Yes | Yes | No  | No  | No  | No  |
| 57556  | SEMA6A    | sema domain, transmembrane domain (TM), and cytoplasmic domain, (semaphorin) 6A            | 6.80E-07 | No  | No  | Yes | No  | No  | No  | No  |
| 23481  | PES1      | pescadillo homolog 1, containing BRCT domain (zebrafish)                                   | 6.82E-07 | No  | No  | Yes | No  | No  | No  | No  |



|        |         |                                                                                     |          |     |     |     |     |    |     |    |
|--------|---------|-------------------------------------------------------------------------------------|----------|-----|-----|-----|-----|----|-----|----|
| 2353   | FOS     | v-fos FBJ murine osteosarcoma viral oncogene homolog                                | 6.84E-07 | No  | No  | Yes | No  | No | Yes | No |
| 48     | ACO1    | aconitase 1, soluble                                                                | 6.86E-07 | Yes | No  | Yes | No  | No | No  | No |
| 10106  | CTDSP2  | CTD (carboxy-terminal domain, RNA polymerase II, polypeptide A) small phosphatase 2 | 6.86E-07 | No  | Yes | Yes | No  | No | No  | No |
| 8805   | TRIM24  | tripartite motif-containing 24                                                      | 6.92E-07 | No  | No  | Yes | No  | No | No  | No |
| 57127  | RHBG    | Rh family, B glycoprotein                                                           | 6.92E-07 | No  | No  | Yes | No  | No | No  | No |
| 64147  | KIF9    | kinesin family member 9                                                             | 6.92E-07 | No  | No  | No  | Yes | No | No  | No |
| 23276  | KLHL18  | kelch-like 18 (Drosophila)                                                          | 6.92E-07 | No  | No  | No  | Yes | No | No  | No |
| 56341  | LSG1    | large subunit GTPase 1 homolog (S. cerevisiae)                                      | 6.93E-07 | No  | No  | No  | Yes | No | No  | No |
| 81609  | SNX27   | sorting nexin family member 27                                                      | 6.95E-07 | No  | No  | Yes | No  | No | No  | No |
| 25864  | ABHD14A | abhydrolase domain containing 14A                                                   | 6.99E-07 | No  | No  | No  | No  | No | No  | No |
| 55677  | IWS1    | IWS1 homolog (S. cerevisiae)                                                        | 7.05E-07 | No  | No  | Yes | No  | No | Yes | No |
| 55234  | SMU1    | smu-1 suppressor of mec-8 and unc-52 homolog (C. elegans)                           | 7.06E-07 | Yes | No  | Yes | No  | No | No  | No |
| 154    | ADRB2   | adrenergic, beta-2-, receptor, surface                                              | 7.06E-07 | Yes | No  | Yes | No  | No | No  | No |
| 9140   | ATG12   | ATG12 autophagy related 12 homolog (S. cerevisiae)                                  | 7.07E-07 | No  | No  | Yes | No  | No | Yes | No |
| 5411   | PNN     | pinin, desmosome associated protein                                                 | 7.08E-07 | No  | Yes | Yes | No  | No | No  | No |
| 117583 | PARD3B  | par-3 partitioning defective 3 homolog B (C. elegans)                               | 7.11E-07 | No  | No  | Yes | No  | No | No  | No |
| 50808  | AK3     | adenylate kinase 3                                                                  | 7.11E-07 | No  | No  | Yes | No  | No | No  | No |
| 83992  | CTTNBP2 | cortactin binding protein 2                                                         | 7.11E-07 | No  | No  | No  | Yes | No | No  | No |
| 1135   | CHRNA2  | cholinergic receptor, nicotinic, alpha 2 (neuronal)                                 | 7.11E-07 | No  | No  | Yes | No  | No | No  | No |
| 9445   | ITM2B   | integral membrane protein 2B                                                        | 7.18E-07 | Yes | No  | Yes | No  | No | No  | No |
| 4008   | LMO7    | LIM domain 7                                                                        | 7.18E-07 | No  | No  | No  | Yes | No | No  | No |
| 4189   | DNAJB9  | DnaJ (Hsp40) homolog, subfamily B, member 9                                         | 7.20E-07 | Yes | No  | Yes | No  | No | No  | No |
| 9619   | ABCG1   | ATP-binding cassette, sub-family G (WHITE), member 1                                | 7.27E-07 | Yes | No  | Yes | No  | No | No  | No |
| 4601   | MXI1    | MAX interactor 1                                                                    | 7.30E-07 | Yes | No  | No  | Yes | No | No  | No |
| 3574   | IL7     | interleukin 7                                                                       | 7.31E-07 | No  | No  | Yes | No  | No | Yes | No |
| 9124   | PDLIM1  | PDZ and LIM domain 1 (elfin)                                                        | 7.31E-07 | Yes | Yes | No  | Yes | No | No  | No |
| 55832  | CAND1   | cullin-associated and neddylation-dissociated 1                                     | 7.31E-07 | No  | No  | No  | Yes | No | No  | No |
| 140707 | BRI3BP  | BRI3 binding protein                                                                | 7.32E-07 | NA  | No  | No  | Yes | No | No  | No |
| 55667  | DENND4C | DENNMADD domain containing 4C                                                       | 7.36E-07 | Yes | No  | Yes | No  | No | No  | No |
| 2065   | ERBB3   | v-erb-b2 erythroblastic leukemia viral oncogene homolog 3 (avian)                   | 7.38E-07 | Yes | No  | No  | Yes | No | No  | No |
| 169714 | QSOX2   | quiescin Q6 sulfhydryl oxidase 2                                                    | 7.39E-07 | No  | Yes | No  | Yes | No | No  | No |
| 55664  | CDC37L1 | cell division cycle 37 homolog (S. cerevisiae)-like 1                               | 7.45E-07 | Yes | No  | Yes | No  | No | No  | No |
| 9419   | CRIP1   | cysteine-rich PDZ-binding protein                                                   | 7.47E-07 | No  | No  | No  | Yes | No | Yes | No |
| 9748   | SLK     | STE20-like kinase (yeast)                                                           | 7.47E-07 | Yes | No  | Yes | No  | No | No  | No |

|        |           |                                                                                     |          |     |    |     |     |     |     |    |
|--------|-----------|-------------------------------------------------------------------------------------|----------|-----|----|-----|-----|-----|-----|----|
| 54504  | CPVL      | carboxypeptidase, vitellogenic-like                                                 | 7.50E-07 | No  | No | No  | Yes | No  | No  | No |
| 56647  | BCCIP     | BRCA2 and CDKN1A interacting protein                                                | 7.52E-07 | No  | No | No  | No  | Yes | Yes | No |
| 5187   | PER1      | period homolog 1 (Drosophila)                                                       | 7.53E-07 | No  | No | Yes | No  | No  | Yes | No |
| 245711 | SPDYA     | speedy homolog A (Drosophila)                                                       | 7.53E-07 | No  | No | No  | No  | Yes | No  | No |
| 1831   | TSC22D3   | TSC22 domain family, member 3                                                       | 7.55E-07 | Yes | No | Yes | No  | No  | No  | No |
| 3304   | HSPA1B    | heat shock 70kDa protein 1B                                                         | 7.56E-07 | Yes | No | Yes | No  | No  | No  | No |
| 252969 | NEIL2     | nei like 2 (E. coli)                                                                | 7.57E-07 | Yes | No | No  | Yes | No  | Yes | No |
| 114836 | SLAMF6    | SLAM family member 6                                                                | 7.59E-07 | No  | No | No  | Yes | No  | No  | No |
| 39     | ACAT2     | acetyl-Coenzyme A acetyltransferase 2                                               | 7.59E-07 | No  | No | Yes | No  | No  | Yes | No |
| 10443  | N4BP2L2   | NEDD4 binding protein 2-like 2                                                      | 7.60E-07 | Yes | No | No  | Yes | No  | No  | No |
| 7957   | EPM2A     | epilepsy, progressive myoclonus type 2A, Lafora disease (laforin)                   | 7.62E-07 | No  | No | Yes | No  | No  | No  | No |
| 4040   | LRP6      | low density lipoprotein receptor-related protein 6                                  | 7.62E-07 | Yes | No | Yes | No  | No  | No  | No |
| 85235  | HIST1H2AH | histone cluster 1, H2ah                                                             | 7.62E-07 | NA  | No | Yes | No  | No  | Yes | No |
| 554235 | LOC554235 | hypothetical protein LOC554235                                                      | 7.62E-07 | No  | No | No  | Yes | No  | No  | No |
| 51691  | LSM8      | LSM8 homolog, U6 small nuclear RNA associated (S. cerevisiae)                       | 7.66E-07 | No  | No | Yes | No  | No  | Yes | No |
| 84057  | MND1      | meiotic nuclear divisions 1 homolog (S. cerevisiae)                                 | 7.67E-07 | No  | No | Yes | No  | No  | No  | No |
| 55737  | VPS35     | vacuolar protein sorting 35 homolog (S. cerevisiae)                                 | 7.67E-07 | Yes | No | No  | Yes | No  | Yes | No |
| 3945   | LDHB      | lactate dehydrogenase B                                                             | 7.68E-07 | No  | No | Yes | No  | No  | No  | No |
| 29079  | MED4      | mediator complex subunit 4                                                          | 7.69E-07 | No  | No | Yes | No  | No  | No  | No |
| 55588  | MED29     | mediator complex subunit 29                                                         | 7.77E-07 | No  | No | No  | Yes | No  | No  | No |
| 199857 | ALG14     | asparagine-linked glycosylation 14 homolog (S. cerevisiae)                          | 7.81E-07 | No  | No | No  | Yes | No  | No  | No |
| 5931   | RBBP7     | retinoblastoma binding protein 7                                                    | 7.81E-07 | No  | No | No  | No  | Yes | No  | No |
| 201299 | RDM1      | RAD52 motif 1                                                                       | 7.83E-07 | No  | No | Yes | No  | No  | No  | No |
| 58476  | TP53INP2  | tumor protein p53 inducible nuclear protein 2                                       | 7.88E-07 | No  | No | No  | Yes | No  | No  | No |
| 219736 | STOX1     | storkhead box 1                                                                     | 7.90E-07 | No  | No | No  | Yes | No  | No  | No |
| 157807 | RLBP1L1   | retinaldehyde binding protein 1-like 1                                              | 7.96E-07 | No  | No | Yes | No  | No  | No  | No |
| 146183 | OTOA      | otoancorin                                                                          | 7.97E-07 | No  | No | Yes | No  | No  | No  | No |
| 84248  | FYTTD1    | forty-two-three domain containing 1                                                 | 7.98E-07 | No  | No | No  | No  | Yes | No  | No |
| 23133  | PHF8      | PHD finger protein 8                                                                | 8.02E-07 | No  | No | Yes | No  | No  | No  | No |
| 51310  | SLC22A17  | solute carrier family 22, member 17                                                 | 8.06E-07 | No  | No | No  | No  | Yes | No  | No |
| 10403  | NDC80     | NDC80 homolog, kinetochore complex component (S. cerevisiae)                        | 8.07E-07 | No  | No | No  | No  | No  | Yes | No |
| 84083  | ZRANB3    | zinc finger, RAN-binding domain containing 3                                        | 8.08E-07 | No  | No | No  | Yes | No  | No  | No |
| 534    | ATP6V1G2  | ATPase, H+ transporting, lysosomal 13kDa, V1 subunit G2                             | 8.14E-07 | No  | No | No  | Yes | No  | No  | No |
| 4795   | NFKBIL1   | nuclear factor of kappa light polypeptide gene enhancer in B-cells inhibitor-like 1 | 8.14E-07 | No  | No | No  | Yes | No  | No  | No |

|        |          |                                                                                |          |     |     |     |     |     |     |    |
|--------|----------|--------------------------------------------------------------------------------|----------|-----|-----|-----|-----|-----|-----|----|
| 51650  | MRPS33   | mitochondrial ribosomal protein S33                                            | 8.14E-07 | No  | No  | No  | Yes | No  | No  | No |
| 64219  | PJA1     | praja 1                                                                        | 8.15E-07 | Yes | No  | Yes | No  | No  | No  | No |
| 51289  | RXFP3    | relaxin/insulin-like family peptide receptor 3                                 | 8.15E-07 | No  | No  | Yes | No  | No  | No  | No |
| 55205  | ZNF532   | zinc finger protein 532                                                        | 8.15E-07 | No  | No  | No  | No  | Yes | No  | No |
| 55363  | HEMGN    | hemogen                                                                        | 8.16E-07 | No  | No  | Yes | No  | No  | No  | No |
| 22928  | SEPHS2   | selenophosphate synthetase 2                                                   | 8.16E-07 | No  | No  | Yes | No  | No  | No  | No |
| 8479   | HIRIP3   | HIRA interacting protein 3                                                     | 8.17E-07 | No  | No  | Yes | No  | No  | No  | No |
| 2802   | GOLGA3   | golgi autoantigen, golgin subfamily a, 3                                       | 8.21E-07 | No  | No  | No  | Yes | No  | Yes | No |
| 91010  | FMNL3    | formin-like 3                                                                  | 8.26E-07 | Yes | No  | Yes | No  | No  | No  | No |
| 51057  | LOC51057 | hypothetical protein LOC51057                                                  | 8.27E-07 | No  | No  | No  | Yes | No  | Yes | No |
| 4190   | MDH1     | malate dehydrogenase 1, NAD (soluble)                                          | 8.27E-07 | No  | No  | No  | Yes | No  | No  | No |
| 51149  | LOC51149 | hypothetical LOC51149                                                          | 8.35E-07 | Yes | No  | Yes | No  | No  | No  | No |
| 64116  | SLC39A8  | solute carrier family 39 (zinc transporter), member 8                          | 8.41E-07 | No  | No  | Yes | No  | No  | Yes | No |
| 57336  | ZNF287   | zinc finger protein 287                                                        | 8.44E-07 | No  | No  | No  | Yes | No  | No  | No |
| 26512  | INTS6    | integrator complex subunit 6                                                   | 8.44E-07 | No  | No  | Yes | No  | No  | Yes | No |
| 83660  | TLN2     | taln 2                                                                         | 8.44E-07 | No  | No  | No  | Yes | No  | No  | No |
| 55958  | KLHL9    | kelch-like 9 (Drosophila)                                                      | 8.45E-07 | Yes | No  | Yes | No  | No  | No  | No |
| 6183   | MRPS12   | mitochondrial ribosomal protein S12                                            | 8.53E-07 | No  | No  | No  | Yes | No  | No  | No |
| 23428  | SLC7A8   | solute carrier family 7 (cationic amino acid transporter, y+ system), member 8 | 8.60E-07 | Yes | No  | No  | Yes | No  | No  | No |
| 6194   | RPS6     | ribosomal protein S6                                                           | 8.61E-07 | No  | No  | No  | Yes | No  | No  | No |
| 6814   | STXBP3   | syntaxin binding protein 3                                                     | 8.61E-07 | No  | No  | Yes | No  | No  | No  | No |
| 7082   | TJP1     | tight junction protein 1 (zona occludens 1)                                    | 8.61E-07 | No  | No  | Yes | No  | No  | No  | No |
| 6535   | SLC6A8   | solute carrier family 6 (neurotransmitter transporter, creatine), member 8     | 8.63E-07 | No  | No  | No  | No  | No  | No  | No |
| 3321   | IGSF3    | immunoglobulin superfamily, member 3                                           | 8.67E-07 | Yes | No  | Yes | No  | No  | No  | No |
| 79884  | MAP9     | microtubule-associated protein 9                                               | 8.68E-07 | Yes | No  | Yes | No  | No  | No  | No |
| 339896 | GADL1    | glutamate decarboxylase-like 1                                                 | 8.68E-07 | NA  | No  | Yes | No  | No  | No  | No |
| 4296   | MAP3K11  | mitogen-activated protein kinase kinase kinase 11                              | 8.69E-07 | Yes | No  | Yes | No  | No  | No  | No |
| 29843  | SENP1    | SUMO1/sentrin specific peptidase 1                                             | 8.73E-07 | No  | No  | No  | Yes | No  | Yes | No |
| 5966   | REL      | v-rel reticuloendotheliosis viral oncogene homolog (avian)                     | 8.74E-07 | No  | No  | Yes | No  | No  | No  | No |
| 54921  | CTF8     | chromosome transmission fidelity factor 8 homolog (S. cerevisiae)              | 8.77E-07 | No  | No  | Yes | No  | No  | Yes | No |
| 57175  | CORO1B   | coronin, actin binding protein, 1B                                             | 8.80E-07 | No  | No  | No  | No  | No  | No  | No |
| 57541  | ZNF398   | zinc finger protein 398                                                        | 8.83E-07 | Yes | No  | Yes | No  | No  | No  | No |
| 79661  | NEIL1    | nei endonuclease VIII-like 1 (E. coli)                                         | 8.83E-07 | No  | Yes | No  | Yes | No  | Yes | No |
| 64175  | LEPRE1   | leucine proline-enriched proteoglycan (leprecan) 1                             | 8.86E-07 | No  | No  | No  | Yes | No  | No  | No |

|        |          |                                                                        |          |     |     |     |     |     |     |    |
|--------|----------|------------------------------------------------------------------------|----------|-----|-----|-----|-----|-----|-----|----|
| 150223 | YDJC     | YdjC homolog (bacterial)                                               | 8.88E-07 | No  | No  | No  | Yes | No  | No  | No |
| 23554  | TSPAN12  | tetraspanin 12                                                         | 8.88E-07 | Yes | No  | Yes | No  | No  | No  | No |
| 147184 | TMEM99   | transmembrane protein 99                                               | 8.92E-07 | No  | No  | Yes | No  | No  | No  | No |
| 50514  | DEC1     | deleted in esophageal cancer 1                                         | 8.93E-07 | No  | No  | Yes | No  | No  | No  | No |
| 5188   | PET112L  | PET112-like (yeast)                                                    | 8.96E-07 | Yes | No  | Yes | No  | No  | No  | No |
| 3398   | ID2      | inhibitor of DNA binding 2, dominant negative helix-loop-helix protein | 8.96E-07 | No  | No  | Yes | No  | No  | Yes | No |
| 3558   | IL2      | interleukin 2                                                          | 8.97E-07 | No  | No  | Yes | No  | No  | No  | No |
| 55914  | ERBB2IP  | erbB2 interacting protein                                              | 8.98E-07 | No  | No  | Yes | No  | No  | Yes | No |
| 115207 | KCTD12   | potassium channel tetramerisation domain containing 12                 | 9.02E-07 | Yes | No  | No  | No  | No  | Yes | No |
| 8618   | CADPS    | Ca <sup>2+</sup> -dependent secretion activator                        | 9.10E-07 | No  | Yes | Yes | No  | No  | No  | No |
| 59342  | SCPEP1   | serine carboxypeptidase 1                                              | 9.16E-07 | Yes | No  | Yes | No  | No  | No  | No |
| 54329  | GPR85    | G protein-coupled receptor 85                                          | 9.22E-07 | Yes | No  | Yes | No  | No  | No  | No |
| 1654   | DDX3X    | DEAD (Asp-Glu-Ala-Asp) box polypeptide 3, X-linked                     | 9.25E-07 | Yes | No  | Yes | No  | No  | No  | No |
| 10335  | MRV1     | murine retrovirus integration site 1 homolog                           | 9.34E-07 | No  | No  | Yes | No  | No  | No  | No |
| 9792   | SERTAD2  | SERTA domain containing 2                                              | 9.36E-07 | No  | No  | Yes | No  | No  | No  | No |
| 57504  | MTA3     | metastasis associated 1 family, member 3                               | 9.50E-07 | No  | No  | No  | Yes | No  | No  | No |
| 10244  | RABEPK   | Rab9 effector protein with kelch motifs                                | 9.51E-07 | Yes | No  | No  | Yes | No  | No  | No |
| 10550  | ARL6IP5  | ADP-ribosylation-like factor 6 interacting protein 5                   | 9.68E-07 | Yes | Yes | Yes | No  | No  | No  | No |
| 1108   | CHD4     | chromodomain helicase DNA binding protein 4                            | 9.70E-07 | No  | No  | No  | Yes | No  | No  | No |
| 55274  | PHF10    | PHD finger protein 10                                                  | 9.71E-07 | Yes | No  | Yes | No  | No  | No  | No |
| 8906   | AP1G2    | adaptor-related protein complex 1, gamma 2 subunit                     | 9.74E-07 | Yes | No  | No  | Yes | No  | No  | No |
| 1810   | DR1      | down-regulator of transcription 1, TBP-binding (negative cofactor 2)   | 9.76E-07 | No  | No  | Yes | No  | No  | No  | No |
| 3309   | HSPA5    | heat shock 70kDa protein 5 (glucose-regulated protein, 78kDa)          | 9.80E-07 | No  | No  | Yes | No  | No  | No  | No |
| 1796   | DOK1     | docking protein 1, 62kDa (downstream of tyrosine kinase 1)             | 9.81E-07 | Yes | No  | No  | Yes | No  | No  | No |
| 84275  | SLC25A33 | solute carrier family 25, member 33                                    | 9.81E-07 | No  | No  | No  | Yes | No  | No  | No |
| 2553   | GABPB2   | GA binding protein transcription factor, beta subunit 2                | 9.84E-07 | Yes | No  | Yes | No  | No  | Yes | No |
| 9972   | NUP153   | nucleoporin 153kDa                                                     | 9.85E-07 | No  | No  | No  | Yes | No  | No  | No |
| 29960  | FTSJ2    | FtsJ homolog 2 (E. coli)                                               | 9.93E-07 | No  | No  | No  | No  | Yes | No  | No |
| 1362   | CPD      | carboxypeptidase D                                                     | 9.93E-07 | No  | Yes | Yes | No  | No  | No  | No |
| 8106   | PABPN1   | poly(A) binding protein, nuclear 1                                     | 1.01E-06 | No  | No  | Yes | No  | No  | No  | No |
| 79788  | ZNF665   | zinc finger protein 665                                                | 1.01E-06 | No  | No  | No  | No  | No  | No  | No |
| 11086  | ADAM29   | ADAM metalloproteinase domain 29                                       | 1.02E-06 | No  | No  | No  | Yes | No  | No  | No |
| 27197  | GPR82    | G protein-coupled receptor 82                                          | 1.02E-06 | Yes | No  | No  | Yes | No  | No  | No |
| 8916   | HERC3    | hect domain and RLD 3                                                  | 1.02E-06 | No  | No  | Yes | No  | No  | Yes | No |

|        |           |                                                               |          |     |    |     |     |     |     |    |
|--------|-----------|---------------------------------------------------------------|----------|-----|----|-----|-----|-----|-----|----|
| 5319   | PLA2G1B   | phospholipase A2, group IB (pancreas)                         | 1.02E-06 | No  | No | Yes | No  | No  | No  | No |
| 7918   | BAT4      | HLA-B associated transcript 4                                 | 1.02E-06 | No  | No | Yes | No  | No  | No  | No |
| 83593  | RASSF5    | Ras association (RalGDS/AF-6) domain family member 5          | 1.02E-06 | Yes | No | No  | Yes | No  | No  | No |
| 130340 | AP1S3     | adaptor-related protein complex 1, sigma 3 subunit            | 1.02E-06 | No  | No | Yes | No  | No  | Yes | No |
| 2110   | ETFDH     | electron-transferring-flavoprotein dehydrogenase              | 1.03E-06 | No  | No | No  | Yes | No  | No  | No |
| 164    | AP1G1     | adaptor-related protein complex 1, gamma 1 subunit            | 1.03E-06 | No  | No | Yes | No  | No  | Yes | No |
| 79598  | CEP97     | centrosomal protein 97kDa                                     | 1.04E-06 | NA  | No | Yes | No  | No  | No  | No |
| 58494  | JAM2      | junctional adhesion molecule 2                                | 1.04E-06 | Yes | No | Yes | No  | No  | No  | No |
| 3665   | IRF7      | interferon regulatory factor 7                                | 1.04E-06 | Yes | No | No  | Yes | No  | No  | No |
| 85442  | KNDC1     | kinase non-catalytic C-lobe domain (KIND) containing 1        | 1.04E-06 | No  | No | No  | No  | No  | No  | No |
| 5432   | POLR2C    | polymerase (RNA) II (DNA directed) polypeptide C, 33kDa       | 1.04E-06 | Yes | No | Yes | No  | No  | No  | No |
| 23063  | WAPAL     | wings apart-like homolog (Drosophila)                         | 1.05E-06 | No  | No | No  | Yes | No  | No  | No |
| 155435 | RBM33     | RNA binding motif protein 33                                  | 1.05E-06 | No  | No | Yes | No  | No  | No  | No |
| 219417 | OR8U1     | olfactory receptor, family 8, subfamily U, member 1           | 1.05E-06 | NA  | No | Yes | No  | No  | No  | No |
| 4919   | ROR1      | receptor tyrosine kinase-like orphan receptor 1               | 1.05E-06 | Yes | No | Yes | No  | No  | No  | No |
| 2171   | FABP5     | fatty acid binding protein 5 (psoriasis-associated)           | 1.06E-06 | No  | No | Yes | No  | No  | No  | No |
| 201475 | RAB12     | RAB12, member RAS oncogene family                             | 1.06E-06 | Yes | No | Yes | No  | No  | No  | No |
| 28962  | OSTM1     | osteopetrosis associated transmembrane protein 1              | 1.06E-06 | Yes | No | No  | No  | Yes | No  | No |
| 121227 | LRIG3     | leucine-rich repeats and immunoglobulin-like domains 3        | 1.06E-06 | No  | No | No  | No  | Yes | No  | No |
| 84546  | SNORD35B  | small nucleolar RNA, C/D box 35B                              | 1.06E-06 | NA  | No | Yes | No  | No  | No  | No |
| 51203  | NUSAP1    | nucleolar and spindle associated protein 1                    | 1.07E-06 | No  | No | Yes | No  | No  | No  | No |
| 9777   | TM9SF4    | transmembrane 9 superfamily protein member 4                  | 1.07E-06 | No  | No | Yes | No  | No  | Yes | No |
| 134359 | C5orf37   | chromosome 5 open reading frame 37                            | 1.07E-06 | No  | No | Yes | No  | No  | Yes | No |
| 441087 | LOC441087 | hypothetical gene supported by AK125735                       | 1.07E-06 | NA  | No | Yes | No  | No  | No  | No |
| 5934   | RBL2      | retinoblastoma-like 2 (p130)                                  | 1.07E-06 | No  | No | No  | No  | No  | No  | No |
| 81608  | FIP1L1    | FIP1 like 1 (S. cerevisiae)                                   | 1.08E-06 | No  | No | Yes | No  | No  | No  | No |
| 9718   | ECE2      | endothelin converting enzyme 2                                | 1.09E-06 | No  | No | No  | Yes | No  | Yes | No |
| 6464   | SHC1      | SHC (Src homology 2 domain containing) transforming protein 1 | 1.09E-06 | No  | No | No  | Yes | No  | No  | No |
| 5160   | PDHA1     | pyruvate dehydrogenase (lipoamide) alpha 1                    | 1.09E-06 | No  | No | No  | No  | Yes | No  | No |
| 7343   | UBTF      | upstream binding transcription factor, RNA polymerase I       | 1.09E-06 | No  | No | No  | Yes | No  | No  | No |
| 7920   | BAT5      | HLA-B associated transcript 5                                 | 1.11E-06 | No  | No | Yes | No  | No  | Yes | No |
| 113026 | PLCD3     | phospholipase C, delta 3                                      | 1.11E-06 | Yes | No | No  | Yes | No  | No  | No |
| 9604   | RNF14     | ring finger protein 14                                        | 1.11E-06 | No  | No | Yes | No  | No  | No  | No |
| 57659  | ZBTB4     | zinc finger and BTB domain containing 4                       | 1.12E-06 | Yes | No | Yes | No  | No  | Yes | No |

|        |          |                                                                                  |          |     |    |     |     |    |     |    |
|--------|----------|----------------------------------------------------------------------------------|----------|-----|----|-----|-----|----|-----|----|
| 414301 | DDI1     | DDI1, DNA-damage inducible 1, homolog 1 (S. cerevisiae)                          | 1.12E-06 | No  | No | Yes | No  | No | No  | No |
| 29093  | MRPL22   | mitochondrial ribosomal protein L22                                              | 1.12E-06 | No  | No | No  | Yes | No | No  | No |
| 7544   | ZFY      | zinc finger protein, Y-linked                                                    | 1.12E-06 | No  | No | No  | No  | No | No  | No |
| 116337 | PANX3    | pannexin 3                                                                       | 1.12E-06 | No  | No | No  | Yes | No | No  | No |
| 5558   | PRIM2    | primase, DNA, polypeptide 2 (58kDa)                                              | 1.13E-06 | No  | No | Yes | No  | No | No  | No |
| 53918  | PELO     | pelota homolog (Drosophila)                                                      | 1.14E-06 | Yes | No | Yes | No  | No | No  | No |
| 55739  | FLJ10769 | hypothetical protein FLJ10769                                                    | 1.15E-06 | No  | No | No  | No  | No | No  | No |
| 8354   | HIST1H3I | histone cluster 1, H3i                                                           | 1.16E-06 | No  | No | Yes | No  | No | Yes | No |
| 2026   | ENO2     | enolase 2 (gamma, neuronal)                                                      | 1.16E-06 | No  | No | No  | No  | No | No  | No |
| 81839  | VANGL1   | vang-like 1 (van gogh, Drosophila)                                               | 1.16E-06 | No  | No | No  | Yes | No | No  | No |
| 10795  | ZNF268   | zinc finger protein 268                                                          | 1.16E-06 | Yes | No | Yes | No  | No | No  | No |
| 5229   | PGGT1B   | protein geranylgeranyltransferase type I, beta subunit                           | 1.17E-06 | No  | No | Yes | No  | No | No  | No |
| 1616   | DAXX     | death-associated protein 6                                                       | 1.19E-06 | No  | No | Yes | No  | No | Yes | No |
| 5151   | PDE8A    | phosphodiesterase 8A                                                             | 1.19E-06 | Yes | No | No  | No  | No | No  | No |
| 1022   | CDK7     | cyclin-dependent kinase 7                                                        | 1.20E-06 | No  | No | Yes | No  | No | No  | No |
| 1124   | CHN2     | chimerin (chimaerin) 2                                                           | 1.20E-06 | No  | No | No  | Yes | No | No  | No |
| 51319  | RSRC1    | arginine/serine-rich coiled-coil 1                                               | 1.20E-06 | No  | No | No  | Yes | No | No  | No |
| 2783   | GNB2     | guanine nucleotide binding protein (G protein), beta polypeptide 2               | 1.20E-06 | No  | No | No  | Yes | No | No  | No |
| 6373   | CXCL11   | chemokine (C-X-C motif) ligand 11                                                | 1.21E-06 | Yes | No | Yes | No  | No | No  | No |
| 161436 | EML5     | echinoderm microtubule associated protein like 5                                 | 1.22E-06 | No  | No | No  | Yes | No | No  | No |
| 113451 | ADC      | arginine decarboxylase                                                           | 1.22E-06 | No  | No | No  | Yes | No | No  | No |
| 5790   | PTPRCAP  | protein tyrosine phosphatase, receptor type, C-associated protein                | 1.22E-06 | No  | No | Yes | No  | No | No  | No |
| 7494   | XBP1     | X-box binding protein 1                                                          | 1.22E-06 | No  | No | Yes | No  | No | Yes | No |
| 790    | CAD      | carbamoyl-phosphate synthetase 2, aspartate transcarbamylase, and dihydroorotase | 1.22E-06 | No  | No | Yes | No  | No | No  | No |
| 10153  | CEBPZ    | CCAAT/enhancer binding protein zeta                                              | 1.22E-06 | No  | No | Yes | No  | No | No  | No |
| 27133  | KCNH5    | potassium voltage-gated channel, subfamily H (eag-related), member 5             | 1.22E-06 | No  | No | Yes | No  | No | No  | No |
| 220988 | HNRNPA3  | heterogeneous nuclear ribonucleoprotein A3                                       | 1.23E-06 | No  | No | Yes | No  | No | No  | No |
| 54545  | MTMR12   | myotubularin related protein 12                                                  | 1.23E-06 | No  | No | Yes | No  | No | No  | No |
| 3064   | HTT      | huntingtin                                                                       | 1.25E-06 | No  | No | No  | Yes | No | No  | No |
| 27299  | ADAMDEC1 | ADAM-like, decysin 1                                                             | 1.25E-06 | No  | No | No  | Yes | No | No  | No |
| 56987  | BBX      | bobby sox homolog (Drosophila)                                                   | 1.25E-06 | Yes | No | Yes | No  | No | No  | No |
| 54541  | DDIT4    | DNA-damage-inducible transcript 4                                                | 1.25E-06 | Yes | No | No  | No  | No | No  | No |
| 8356   | HIST1H3J | histone cluster 1, H3j                                                           | 1.25E-06 | NA  | No | Yes | No  | No | No  | No |
| 10577  | NPC2     | Niemann-Pick disease, type C2                                                    | 1.25E-06 | Yes | No | Yes | No  | No | No  | No |

|        |          |                                                                    |          |     |     |     |     |     |     |     |
|--------|----------|--------------------------------------------------------------------|----------|-----|-----|-----|-----|-----|-----|-----|
| 5786   | PTPRA    | protein tyrosine phosphatase, receptor type, A                     | 1.25E-06 | No  | No  | Yes | No  | No  | No  | No  |
| 113251 | LARP4    | La ribonucleoprotein domain family, member 4                       | 1.26E-06 | No  | No  | No  | Yes | No  | No  | No  |
| 3005   | H1F0     | H1 histone family, member 0                                        | 1.27E-06 | No  | No  | No  | No  | Yes | No  | No  |
| 340596 | LHFPL1   | lipoma HMGIC fusion partner-like 1                                 | 1.27E-06 | No  | No  | Yes | No  | No  | No  | No  |
| 22800  | RRAS2    | related RAS viral (r-ras) oncogene homolog 2                       | 1.29E-06 | No  | Yes | Yes | No  | No  | No  | No  |
| 83719  | YPFL3    | yippee-like 3 (Drosophila)                                         | 1.31E-06 | Yes | No  | Yes | No  | No  | No  | No  |
| 83874  | TBC1D10A | TBC1 domain family, member 10A                                     | 1.31E-06 | Yes | No  | No  | No  | No  | No  | No  |
| 10559  | SLC35A1  | solute carrier family 35 (CMP-sialic acid transporter), member A1  | 1.32E-06 | No  | No  | Yes | No  | No  | No  | No  |
| 55296  | TBC1D19  | TBC1 domain family, member 19                                      | 1.32E-06 | No  | No  | No  | Yes | No  | No  | No  |
| 64801  | ARV1     | ARV1 homolog (S. cerevisiae)                                       | 1.32E-06 | No  | No  | No  | No  | No  | Yes | No  |
| 9679   | FAM53B   | family with sequence similarity 53, member B                       | 1.32E-06 | No  | No  | No  | Yes | No  | No  | No  |
| 10163  | WASF2    | WAS protein family, member 2                                       | 1.33E-06 | Yes | No  | No  | Yes | No  | No  | No  |
| 5888   | RAD51    | RAD51 homolog (RecA homolog, E. coli) (S. cerevisiae)              | 1.33E-06 | No  | No  | Yes | No  | No  | Yes | No  |
| 4507   | MTAP     | methylthioadenosine phosphorylase                                  | 1.34E-06 | No  | No  | Yes | No  | No  | No  | No  |
| 51138  | COP54    | COP9 constitutive photomorphogenic homolog subunit 4 (Arabidopsis) | 1.35E-06 | No  | No  | No  | Yes | No  | No  | No  |
| 5922   | RASA2    | RAS p21 protein activator 2                                        | 1.36E-06 | Yes | No  | Yes | No  | No  | Yes | Yes |
| 84727  | SPSB2    | sp/A/ryanodine receptor domain and SOCS box containing 2           | 1.36E-06 | No  | No  | No  | No  | Yes | No  | No  |
| 56852  | RAD18    | RAD18 homolog (S. cerevisiae)                                      | 1.36E-06 | No  | No  | Yes | No  | No  | No  | No  |
| 677834 | SNORA55  | small nucleolar RNA, H/ACA box 55                                  | 1.36E-06 | NA  | No  | Yes | No  | No  | No  | No  |
| 9601   | PDI4     | protein disulfide isomerase family A, member 4                     | 1.36E-06 | No  | No  | Yes | No  | No  | Yes | No  |
| 3727   | JUND     | jun D proto-oncogene                                               | 1.36E-06 | Yes | No  | Yes | No  | No  | No  | No  |
| 23200  | ATP11B   | ATPase, class VI, type 11B                                         | 1.39E-06 | No  | No  | Yes | No  | No  | No  | No  |
| 119391 | GSTO2    | glutathione S-transferase omega 2                                  | 1.40E-06 | No  | No  | Yes | No  | No  | No  | No  |
| 1945   | EFNA4    | ephrin-A4                                                          | 1.40E-06 | No  | No  | Yes | No  | No  | No  | No  |
| 10367  | CBARA1   | calcium binding atopy-related autoantigen 1                        | 1.40E-06 | No  | No  | Yes | No  | No  | No  | No  |
| 283991 | FAM100B  | family with sequence similarity 100, member B                      | 1.41E-06 | No  | No  | Yes | No  | No  | No  | No  |
| 6314   | ATXN7    | ataxin 7                                                           | 1.42E-06 | No  | No  | Yes | No  | No  | No  | No  |
| 55081  | IFT57    | intraflagellar transport 57 homolog (Chlamydomonas)                | 1.42E-06 | Yes | Yes | Yes | No  | No  | No  | No  |
| 10714  | POLD3    | polymerase (DNA-directed), delta 3, accessory subunit              | 1.42E-06 | No  | No  | No  | Yes | No  | No  | No  |
| 262    | AMD1     | adenosylmethionine decarboxylase 1                                 | 1.43E-06 | Yes | No  | Yes | No  | No  | Yes | No  |
| 55156  | ARMC1    | armadillo repeat containing 1                                      | 1.43E-06 | No  | No  | Yes | No  | No  | No  | No  |
| 81848  | SPRY4    | sprouty homolog 4 (Drosophila)                                     | 1.43E-06 | Yes | No  | Yes | No  | No  | No  | No  |
| 152206 | CCDC13   | coiled-coil domain containing 13                                   | 1.44E-06 | Yes | No  | Yes | No  | No  | No  | No  |
| 55536  | CDC47L   | cell division cycle associated 7-like                              | 1.44E-06 | Yes | No  | Yes | No  | No  | No  | No  |

|        |           |                                                                             |          |     |     |     |     |     |     |     |
|--------|-----------|-----------------------------------------------------------------------------|----------|-----|-----|-----|-----|-----|-----|-----|
| 7336   | UBE2V2    | ubiquitin-conjugating enzyme E2 variant 2                                   | 1.45E-06 | No  | No  | Yes | No  | No  | No  | No  |
| 5597   | MAPK6     | mitogen-activated protein kinase 6                                          | 1.46E-06 | No  | No  | Yes | No  | No  | No  | No  |
| 57018  | CCNL1     | cyclin L1                                                                   | 1.47E-06 | No  | No  | No  | Yes | No  | Yes | No  |
| 118    | ADD1      | adducin 1 (alpha)                                                           | 1.47E-06 | Yes | No  | Yes | No  | No  | No  | No  |
| 7317   | UBA1      | ubiquitin-like modifier activating enzyme 1                                 | 1.47E-06 | No  | No  | Yes | No  | No  | No  | No  |
| 2908   | NR3C1     | nuclear receptor subfamily 3, group C, member 1 (glucocorticoid receptor)   | 1.47E-06 | No  | No  | Yes | No  | No  | No  | No  |
| 441931 | LOC441931 | putative G-protein coupled receptor                                         | 1.47E-06 | NA  | No  | Yes | No  | No  | No  | No  |
| 5167   | ENPP1     | ectonucleotide pyrophosphatase/phosphodiesterase 1                          | 1.48E-06 | No  | No  | Yes | No  | No  | No  | No  |
| 7347   | UCHL3     | ubiquitin carboxyl-terminal esterase L3 (ubiquitin thiolesterase)           | 1.48E-06 | No  | No  | Yes | No  | No  | No  | No  |
| 5896   | RAG1      | recombination activating gene 1                                             | 1.48E-06 | No  | No  | No  | Yes | No  | No  | No  |
| 83999  | KREMEN1   | kringle containing transmembrane protein 1                                  | 1.48E-06 | Yes | No  | No  | No  | No  | No  | No  |
| 23064  | SETX      | senataxin                                                                   | 1.48E-06 | Yes | No  | Yes | No  | No  | No  | No  |
| 9987   | HNRPDL    | heterogeneous nuclear ribonucleoprotein D-like                              | 1.49E-06 | Yes | No  | No  | Yes | No  | Yes | Yes |
| 55823  | VPS11     | vacuolar protein sorting 11 homolog (S. cerevisiae)                         | 1.49E-06 | No  | No  | No  | Yes | No  | Yes | No  |
| 5090   | PBX3      | pre-B-cell leukemia homeobox 3                                              | 1.49E-06 | No  |
| 8013   | NR4A3     | nuclear receptor subfamily 4, group A, member 3                             | 1.49E-06 | Yes | No  | Yes | No  | No  | Yes | No  |
| 5713   | PSMD7     | proteasome (prosome, macropain) 26S subunit, non-ATPase, 7                  | 1.50E-06 | No  | No  | Yes | No  | No  | No  | No  |
| 51585  | PCF11     | PCF11, cleavage and polyadenylation factor subunit, homolog (S. cerevisiae) | 1.50E-06 | No  | No  | Yes | No  | No  | No  | No  |
| 339976 | TRIML1    | tripartite motif family-like 1                                              | 1.50E-06 | No  | No  | Yes | No  | No  | No  | No  |
| 94005  | PIGS      | phosphatidylinositol glycan anchor biosynthesis, class S                    | 1.50E-06 | No  | No  | No  | No  | Yes | No  | No  |
| 10725  | NFAT5     | nuclear factor of activated T-cells 5, tonicity-responsive                  | 1.52E-06 | No  | No  | Yes | No  | No  | No  | No  |
| 1717   | DHCR7     | 7-dehydrocholesterol reductase                                              | 1.52E-06 | Yes | No  | Yes | No  | No  | No  | No  |
| 55191  | NADSYN1   | NAD synthetase 1                                                            | 1.52E-06 | No  | No  | Yes | No  | No  | No  | No  |
| 51778  | MYOZ2     | myozenin 2                                                                  | 1.52E-06 | No  | No  | Yes | No  | No  | No  | No  |
| 23529  | CLCF1     | cardiotrophin-like cytokine factor 1                                        | 1.53E-06 | Yes | No  | No  | No  | Yes | No  | No  |
| 10882  | C1QL1     | complement component 1, q subcomponent-like 1                               | 1.53E-06 | No  | No  | No  | Yes | No  | No  | No  |
| 597    | BCL2A1    | BCL2-related protein A1                                                     | 1.54E-06 | No  | No  | Yes | No  | No  | Yes | No  |
| 91694  | LONRF1    | LON peptidase N-terminal domain and ring finger 1                           | 1.55E-06 | No  | Yes | Yes | No  | No  | No  | No  |
| 84624  | FNDC1     | fibronectin type III domain containing 1                                    | 1.56E-06 | No  | No  | Yes | No  | No  | No  | No  |
| 60528  | ELAC2     | elaC homolog 2 (E. coli)                                                    | 1.56E-06 | No  |
| 6050   | RNH1      | ribonuclease/angiogenin inhibitor 1                                         | 1.56E-06 | Yes | No  | No  | No  | Yes | No  | No  |
| 2965   | GTF2H1    | general transcription factor IIH, polypeptide 1, 62kDa                      | 1.56E-06 | No  | No  | No  | Yes | No  | No  | No  |
| 11234  | HPS5      | Hermansky-Pudlak syndrome 5                                                 | 1.56E-06 | No  | No  | No  | Yes | No  | No  | No  |
| 254879 | OR2T6     | olfactory receptor, family 2, subfamily T, member 6                         | 1.56E-06 | NA  | No  | Yes | No  | No  | No  | No  |



|        |          |                                                                                   |          |     |     |     |     |     |     |    |
|--------|----------|-----------------------------------------------------------------------------------|----------|-----|-----|-----|-----|-----|-----|----|
| 51002  | TPRKB    | TP53RK binding protein                                                            | 1.56E-06 | No  | No  | No  | Yes | No  | No  | No |
| 199704 | ZNF585A  | zinc finger protein 585A                                                          | 1.57E-06 | No  | No  | No  | No  | No  | Yes | No |
| 80818  | ZNF436   | zinc finger protein 436                                                           | 1.59E-06 | No  | No  | No  | Yes | No  | No  | No |
| 11164  | NUDT5    | nudix (nucleoside diphosphate linked moiety X)-type motif 5                       | 1.59E-06 | No  | No  | Yes | No  | No  | Yes | No |
| 2974   | GUCY1B2  | guanylate cyclase 1, soluble, beta 2                                              | 1.60E-06 | No  | No  | Yes | No  | No  | No  | No |
| 23194  | FBXL7    | F-box and leucine-rich repeat protein 7                                           | 1.60E-06 | No  | Yes | Yes | No  | No  | No  | No |
| 51554  | CCRL1    | chemokine (C-C motif) receptor-like 1                                             | 1.60E-06 | No  | No  | Yes | No  | No  | No  | No |
| 57407  | NMRAL1   | NmrA-like family domain containing 1                                              | 1.60E-06 | No  | No  | Yes | No  | No  | No  | No |
| 3163   | HMOX2    | heme oxygenase (decycling) 2                                                      | 1.60E-06 | No  | No  | Yes | No  | No  | No  | No |
| 10953  | TOMM34   | translocase of outer mitochondrial membrane 34                                    | 1.60E-06 | No  | No  | Yes | No  | No  | No  | No |
| 4012   | LNPEP    | leucyl/cystinyl aminopeptidase                                                    | 1.60E-06 | No  | No  | Yes | No  | No  | No  | No |
| 3033   | HADH     | hydroxyacyl-Coenzyme A dehydrogenase                                              | 1.60E-06 | No  | No  | Yes | No  | No  | No  | No |
| 10982  | MAPRE2   | microtubule-associated protein, RP/EB family, member 2                            | 1.61E-06 | Yes | No  | Yes | No  | No  | No  | No |
| 23643  | LY96     | lymphocyte antigen 96                                                             | 1.61E-06 | Yes | No  | Yes | No  | No  | Yes | No |
| 4435   | CITED1   | Cbp/p300-interacting transactivator, with Glu/Asp-rich carboxy-terminal domain, 1 | 1.62E-06 | Yes | No  | No  | Yes | No  | No  | No |
| 51116  | MRPS2    | mitochondrial ribosomal protein S2                                                | 1.63E-06 | No  | No  | Yes | No  | No  | No  | No |
| 8125   | ANP32A   | acidic (leucine-rich) nuclear phosphoprotein 32 family, member A                  | 1.63E-06 | No  | Yes | Yes | No  | No  | No  | No |
| 84287  | ZDHC16   | zinc finger, DHHC-type containing 16                                              | 1.63E-06 | No  | No  | No  | Yes | No  | No  | No |
| 51013  | EXOSC1   | exosome component 1                                                               | 1.63E-06 | No  | No  | No  | Yes | No  | No  | No |
| 51399  | TRAPPC4  | trafficking protein particle complex 4                                            | 1.63E-06 | No  | No  | Yes | No  | No  | No  | No |
| 170690 | ADAMTS16 | ADAM metalloproteinase with thrombospondin type 1 motif, 16                       | 1.64E-06 | Yes | No  | Yes | No  | No  | No  | No |
| 23588  | KLHDC2   | kelch domain containing 2                                                         | 1.65E-06 | No  | No  | Yes | No  | No  | No  | No |
| 6625   | SNRP70   | small nuclear ribonucleoprotein 70kDa polypeptide (RNP antigen)                   | 1.65E-06 | Yes | No  | No  | No  | No  | No  | No |
| 25939  | SAMHD1   | SAM domain and HD domain 1                                                        | 1.66E-06 | No  | No  | No  | No  | Yes | No  | No |
| 1948   | EFNB2    | ephrin-B2                                                                         | 1.66E-06 | No  | No  | Yes | No  | No  | No  | No |
| 10347  | ABCA7    | ATP-binding cassette, sub-family A (ABC1), member 7                               | 1.66E-06 | No  | No  | No  | Yes | No  | No  | No |
| 57172  | CAMK1G   | calcium/calmodulin-dependent protein kinase IG                                    | 1.66E-06 | Yes | No  | Yes | No  | No  | No  | No |
| 2919   | CXCL1    | chemokine (C-X-C motif) ligand 1 (melanoma growth stimulating activity, alpha)    | 1.66E-06 | Yes | No  | Yes | No  | No  | No  | No |
| 5602   | MAPK10   | mitogen-activated protein kinase 10                                               | 1.67E-06 | No  | Yes | Yes | No  | No  | Yes | No |
| 84331  | C16orf14 | chromosome 16 open reading frame 14                                               | 1.67E-06 | No  | No  | No  | No  | No  | No  | No |
| 203328 | SUSD3    | sushi domain containing 3                                                         | 1.68E-06 | No  | No  | Yes | No  | No  | No  | No |
| 8625   | RFXANK   | regulatory factor X-associated ankyrin-containing protein                         | 1.68E-06 | No  | No  | No  | Yes | No  | No  | No |
| 10721  | POLQ     | polymerase (DNA directed), theta                                                  | 1.69E-06 | No  | No  | Yes | No  | No  | Yes | No |
| 8743   | TNFSF10  | tumor necrosis factor (ligand) superfamily, member 10                             | 1.69E-06 | Yes | No  | No  | Yes | No  | No  | No |

|        |          |                                                                                       |          |     |    |     |     |     |     |    |
|--------|----------|---------------------------------------------------------------------------------------|----------|-----|----|-----|-----|-----|-----|----|
| 2987   | GUK1     | guanylate kinase 1                                                                    | 1.69E-06 | No  | No | No  | Yes | No  | No  | No |
| 1265   | CNN2     | calponin 2                                                                            | 1.70E-06 | No  | No | Yes | No  | No  | No  | No |
| 10542  | HBXIP    | hepatitis B virus x interacting protein                                               | 1.70E-06 | No  | No | Yes | No  | No  | Yes | No |
| 11320  | MGAT4A   | mannosyl (alpha-1,3)-glycoprotein beta-1,4-N-acetylglucosaminyltransferase, isozyme A | 1.70E-06 | Yes | No | No  | Yes | No  | No  | No |
| 50937  | CDON     | Cdon homolog (mouse)                                                                  | 1.70E-06 | No  | No | Yes | No  | No  | No  | No |
| 84217  | ZMYND12  | zinc finger, MYND-type containing 12                                                  | 1.71E-06 | No  | No | No  | No  | Yes | Yes | No |
| 25949  | SYF2     | SYF2 homolog, RNA splicing factor (S. cerevisiae)                                     | 1.71E-06 | No  | No | Yes | No  | No  | Yes | No |
| 140545 | RNF32    | ring finger protein 32                                                                | 1.71E-06 | Yes | No | Yes | No  | No  | No  | No |
| 79872  | CBLL1    | Cas-Br-M (murine) ecotropic retroviral transforming sequence-like 1                   | 1.71E-06 | No  | No | Yes | No  | No  | Yes | No |
| 56606  | SLC2A9   | solute carrier family 2 (facilitated glucose transporter), member 9                   | 1.71E-06 | No  | No | No  | No  | No  | No  | No |
| 256051 | ZNF549   | zinc finger protein 549                                                               | 1.71E-06 | Yes | No | No  | Yes | No  | No  | No |
| 5936   | RBM4     | RNA binding motif protein 4                                                           | 1.72E-06 | No  | No | Yes | No  | No  | No  | No |
| 9524   | GPSN2    | glycoprotein, synaptic 2                                                              | 1.73E-06 | No  | No | No  | No  | Yes | No  | No |
| 8738   | CRADD    | CASP2 and RIPK1 domain containing adaptor with death domain                           | 1.74E-06 | No  | No | No  | Yes | No  | No  | No |
| 22905  | EPN2     | epsin 2                                                                               | 1.74E-06 | No  | No | Yes | No  | No  | Yes | No |
| 8971   | H1FX     | H1 histone family, member X                                                           | 1.74E-06 | No  | No | Yes | No  | No  | No  | No |
| 8624   | PSMG1    | proteasome (prosome, macropain) assembly chaperone 1                                  | 1.74E-06 | No  | No | Yes | No  | No  | No  | No |
| 6723   | SRM      | spermidine synthase                                                                   | 1.75E-06 | No  | No | Yes | No  | No  | No  | No |
| 10733  | PLK4     | polo-like kinase 4 (Drosophila)                                                       | 1.75E-06 | No  | No | Yes | No  | No  | No  | No |
| 51105  | PHF20L1  | PHD finger protein 20-like 1                                                          | 1.75E-06 | No  | No | Yes | No  | No  | No  | No |
| 57157  | PHTF2    | putative homeodomain transcription factor 2                                           | 1.77E-06 | No  | No | Yes | No  | No  | No  | No |
| 4791   | NFKB2    | nuclear factor of kappa light polypeptide gene enhancer in B-cells 2 (p49/p100)       | 1.78E-06 | Yes | No | No  | Yes | No  | No  | No |
| 2785   | GNG3     | guanine nucleotide binding protein (G protein), gamma 3                               | 1.79E-06 | No  | No | Yes | No  | No  | Yes | No |
| 1979   | EIF4EBP2 | eukaryotic translation initiation factor 4E binding protein 2                         | 1.79E-06 | No  | No | Yes | No  | No  | Yes | No |
| 11315  | PARK7    | Parkinson disease (autosomal recessive, early onset) 7                                | 1.79E-06 | No  | No | Yes | No  | No  | No  | No |
| 2958   | GTF2A2   | general transcription factor IIA, 2, 12kDa                                            | 1.80E-06 | No  | No | Yes | No  | No  | No  | No |
| 54516  | MTRF1L   | mitochondrial translational release factor 1-like                                     | 1.80E-06 | No  | No | Yes | No  | No  | No  | No |
| 80095  | ZNF606   | zinc finger protein 606                                                               | 1.81E-06 | Yes | No | Yes | No  | No  | No  | No |
| 122809 | SOCS4    | suppressor of cytokine signaling 4                                                    | 1.81E-06 | No  | No | No  | Yes | No  | No  | No |
| 157506 | RDH10    | retinol dehydrogenase 10 (all-trans)                                                  | 1.81E-06 | No  | No | No  | No  | Yes | No  | No |
| 51805  | COQ3     | coenzyme Q3 homolog, methyltransferase (S. cerevisiae)                                | 1.81E-06 | No  | No | Yes | No  | No  | No  | No |
| 29068  | ZBTB44   | zinc finger and BTB domain containing 44                                              | 1.83E-06 | No  | No | No  | No  | No  | No  | No |
| 8443   | GNPAT    | glyceronephosphate O-acyltransferase                                                  | 1.83E-06 | No  | No | Yes | No  | No  | No  | No |
| 5732   | PTGER2   | prostaglandin E receptor 2 (subtype EP2), 53kDa                                       | 1.83E-06 | Yes | No | No  | Yes | No  | No  | No |

|        |           |                                                                       |          |     |     |     |     |     |     |     |
|--------|-----------|-----------------------------------------------------------------------|----------|-----|-----|-----|-----|-----|-----|-----|
| 26088  | GGA1      | golgi associated, gamma adaptin ear containing, ARF binding protein 1 | 1.83E-06 | No  | Yes | No  | No  | No  | No  | No  |
| 79626  | TNFAIP8L2 | tumor necrosis factor, alpha-induced protein 8-like 2                 | 1.84E-06 | Yes | Yes | No  | Yes | No  | No  | No  |
| 1977   | EIF4E     | eukaryotic translation initiation factor 4E                           | 1.84E-06 | No  | No  | No  | Yes | No  | Yes | No  |
| 150368 | FAM109B   | family with sequence similarity 109, member B                         | 1.84E-06 | Yes | No  | Yes | No  | No  | No  | No  |
| 11000  | SLC27A3   | solute carrier family 27 (fatty acid transporter), member 3           | 1.86E-06 | Yes | No  | No  | No  | No  | No  | No  |
| 6324   | SCN1B     | sodium channel, voltage-gated, type I, beta                           | 1.87E-06 | No  |
| 9847   | KIAA0528  | KIAA0528                                                              | 1.88E-06 | No  | No  | Yes | No  | No  | No  | No  |
| 4174   | MCM5      | minichromosome maintenance complex component 5                        | 1.88E-06 | No  | No  | Yes | No  | No  | No  | No  |
| 8935   | SKAP2     | src kinase associated phosphoprotein 2                                | 1.89E-06 | No  | No  | Yes | No  | No  | No  | No  |
| 28973  | MRPS18B   | mitochondrial ribosomal protein S18B                                  | 1.89E-06 | No  | Yes | Yes | No  | No  | Yes | Yes |
| 81846  | SBF2      | SET binding factor 2                                                  | 1.89E-06 | Yes | No  | No  | Yes | No  | No  | No  |
| 133    | ADM       | adrenomedullin                                                        | 1.89E-06 | No  | No  | No  | Yes | No  | No  | No  |
| 79948  | PRG2      | plasticity-related gene 2                                             | 1.89E-06 | No  | No  | No  | Yes | No  | No  | No  |
| 51147  | ING4      | inhibitor of growth family, member 4                                  | 1.89E-06 | No  | No  | Yes | No  | No  | No  | No  |
| 5747   | PTK2      | PTK2 protein tyrosine kinase 2                                        | 1.90E-06 | No  | Yes | No  | Yes | No  | No  | No  |
| 6726   | SRP9      | signal recognition particle 9kDa                                      | 1.91E-06 | No  | No  | Yes | No  | No  | No  | No  |
| 1819   | DRG2      | developmentally regulated GTP binding protein 2                       | 1.92E-06 | No  | No  | No  | Yes | No  | No  | No  |
| 1203   | CLN5      | ceroid-lipofuscinosis, neuronal 5                                     | 1.92E-06 | Yes | No  | No  | Yes | No  | No  | No  |
| 91782  | CHMP7     | CHMP family, member 7                                                 | 1.92E-06 | No  | No  | No  | Yes | No  | No  | No  |
| 259266 | ASPM      | asp (abnormal spindle) homolog, microcephaly associated (Drosophila)  | 1.93E-06 | No  | No  | Yes | No  | No  | No  | No  |
| 57001  | ACN9      | ACN9 homolog (S. cerevisiae)                                          | 1.94E-06 | No  | No  | Yes | No  | No  | No  | No  |
| 8560   | DEGS1     | degenerative spermatocyte homolog 1, lipid desaturase (Drosophila)    | 1.94E-06 | No  | No  | Yes | No  | No  | No  | No  |
| 8339   | HIST1H2BG | histone cluster 1, H2bg                                               | 1.97E-06 | Yes | No  | Yes | No  | No  | Yes | No  |
| 84790  | TUBA1C    | tubulin, alpha 1c                                                     | 1.97E-06 | No  | No  | Yes | No  | No  | No  | No  |
| 391112 | OR6Y1     | olfactory receptor, family 6, subfamily Y, member 1                   | 1.98E-06 | NA  | No  | Yes | No  | No  | No  | No  |
| 114609 | TIRAP     | toll-interleukin 1 receptor (TIR) domain containing adaptor protein   | 1.98E-06 | Yes | No  | No  | No  | Yes | No  | No  |
| 29969  | MDFIC     | MyoD family inhibitor domain containing                               | 1.98E-06 | No  | No  | Yes | No  | No  | No  | No  |
| 10800  | CYSLTR1   | cysteinyl leukotriene receptor 1                                      | 1.99E-06 | Yes | Yes | Yes | No  | No  | No  | No  |
| 6631   | SNRPC     | small nuclear ribonucleoprotein polypeptide C                         | 1.99E-06 | No  | No  | Yes | No  | No  | Yes | No  |
| 164668 | APOBEC3H  | apolipoprotein B mRNA editing enzyme, catalytic polypeptide-like 3H   | 1.99E-06 | NA  | No  | No  | Yes | No  | No  | No  |
| 11040  | PIM2      | pim-2 oncogene                                                        | 1.99E-06 | No  | No  | Yes | No  | No  | Yes | No  |
| 26502  | NARF      | nuclear prelamin A recognition factor                                 | 1.99E-06 | No  | No  | No  | Yes | No  | No  | No  |
| 8772   | FADD      | Fas (TNFRSF6)-associated via death domain                             | 2.00E-06 | No  | No  | No  | Yes | No  | No  | No  |
| 10486  | CAP2      | CAP, adenylate cyclase-associated protein, 2 (yeast)                  | 2.00E-06 | No  | No  | No  | Yes | No  | No  | No  |

|       |        |                                                              |          |     |     |     |     |    |     |     |
|-------|--------|--------------------------------------------------------------|----------|-----|-----|-----|-----|----|-----|-----|
| 57337 | SENP7  | SUMO1/sentrin specific peptidase 7                           | 2.00E-06 | No  | No  | Yes | No  | No | No  | No  |
| 5368  | PNOC   | prepronociceptin                                             | 2.00E-06 | No  | No  | Yes | No  | No | No  | No  |
| 55527 | FEM1A  | fem-1 homolog a (C. elegans)                                 | 2.01E-06 | No  | No  | Yes | No  | No | No  | No  |
| 57693 | ZNF317 | zinc finger protein 317                                      | 2.02E-06 | Yes | No  | Yes | No  | No | Yes | No  |
| 80059 | LRRTM4 | leucine rich repeat transmembrane neuronal 4                 | 2.02E-06 | No  | No  | Yes | No  | No | No  | No  |
| 922   | CDSL   | CD5 molecule-like                                            | 2.02E-06 | No  | No  | Yes | No  | No | No  | No  |
| 8832  | CD84   | CD84 molecule                                                | 2.04E-06 | Yes | No  | Yes | No  | No | No  | No  |
| 83743 | GRWD1  | glutamate-rich WD repeat containing 1                        | 2.04E-06 | No  | No  | Yes | No  | No | No  | No  |
| 5884  | RAD17  | RAD17 homolog (S. pombe)                                     | 2.05E-06 | No  | Yes | Yes | No  | No | No  | No  |
| 79811 | SLTM   | SAFB-like, transcription modulator                           | 2.05E-06 | No  | No  | Yes | No  | No | No  | No  |
| 5330  | PLCB2  | phospholipase C, beta 2                                      | 2.06E-06 | Yes | No  | No  | Yes | No | No  | No  |
| 55705 | IPO9   | importin 9                                                   | 2.06E-06 | No  | No  | Yes | No  | No | No  | No  |
| 4321  | MMP12  | matrix metallopeptidase 12 (macrophage elastase)             | 2.07E-06 | No  | No  | Yes | No  | No | No  | No  |
| 4084  | MXD1   | MAX dimerization protein 1                                   | 2.08E-06 | Yes | No  | Yes | No  | No | No  | No  |
| 481   | ATP1B1 | ATPase, Na+/K+ transporting, beta 1 polypeptide              | 2.10E-06 | No  | No  | Yes | No  | No | Yes | No  |
| 23531 | MMD    | monocyte to macrophage differentiation-associated            | 2.10E-06 | No  | No  | Yes | No  | No | No  | No  |
| 78994 | PRR14  | proline rich 14                                              | 2.10E-06 | Yes | No  | Yes | No  | No | No  | No  |
| 7411  | VBP1   | von Hippel-Lindau binding protein 1                          | 2.10E-06 | Yes | No  | No  | Yes | No | No  | No  |
| 1785  | DNM2   | dynamitin 2                                                  | 2.10E-06 | Yes | No  | No  | Yes | No | No  | No  |
| 55432 | YOD1   | YOD1 OTU deubiquinating enzyme 1 homolog (S. cerevisiae)     | 2.11E-06 | No  | Yes | Yes | No  | No | No  | No  |
| 4774  | NFIA   | nuclear factor I/A                                           | 2.11E-06 | No  | No  | Yes | No  | No | Yes | No  |
| 4048  | LTA4H  | leukotriene A4 hydrolase                                     | 2.12E-06 | No  | No  | Yes | No  | No | Yes | Yes |
| 4017  | LOXL2  | lysyl oxidase-like 2                                         | 2.12E-06 | No  | Yes | Yes | No  | No | No  | No  |
| 7564  | ZNF16  | zinc finger protein 16                                       | 2.12E-06 | No  | No  | Yes | No  | No | No  | No  |
| 3215  | HOXB5  | homeobox B5                                                  | 2.13E-06 | No  | No  | Yes | No  | No | No  | No  |
| 1844  | DUSP2  | dual specificity phosphatase 2                               | 2.13E-06 | No  | No  | No  | Yes | No | Yes | No  |
| 6095  | RORA   | RAR-related orphan receptor A                                | 2.13E-06 | Yes | No  | Yes | No  | No | No  | No  |
| 57534 | MIB1   | mindbomb homolog 1 (Drosophila)                              | 2.16E-06 | No  | No  | Yes | No  | No | No  | No  |
| 84614 | ZBTB37 | zinc finger and BTB domain containing 37                     | 2.16E-06 | No  | No  | Yes | No  | No | Yes | No  |
| 55270 | NUDT15 | nudix (nucleoside diphosphate linked moiety X)-type motif 15 | 2.16E-06 | No  | No  | Yes | No  | No | No  | No  |
| 57679 | ALS2   | amyotrophic lateral sclerosis 2 (juvenile)                   | 2.16E-06 | Yes | No  | Yes | No  | No | No  | No  |
| 3608  | ILF2   | interleukin enhancer binding factor 2, 45kDa                 | 2.17E-06 | No  | No  | Yes | No  | No | Yes | No  |
| 10346 | TRIM22 | tripartite motif-containing 22                               | 2.18E-06 | Yes | No  | No  | Yes | No | No  | No  |
| 3014  | H2AFX  | H2A histone family, member X                                 | 2.18E-06 | No  | No  | Yes | No  | No | No  | No  |

|        |         |                                                                   |          |     |     |     |     |    |     |     |
|--------|---------|-------------------------------------------------------------------|----------|-----|-----|-----|-----|----|-----|-----|
| 84376  | HOOK3   | hook homolog 3 (Drosophila)                                       | 2.18E-06 | Yes | No  | Yes | No  | No | No  | No  |
| 9784   | SNX17   | sorting nexin 17                                                  | 2.18E-06 | No  | No  | No  | Yes | No | No  | No  |
| 5469   | MED1    | mediator complex subunit 1                                        | 2.19E-06 | No  | No  | Yes | No  | No | No  | No  |
| 55862  | ECHDC1  | enoyl Coenzym A hydratase domain containing 1                     | 2.19E-06 | Yes | No  | Yes | No  | No | Yes | No  |
| 84343  | HPS3    | Hermansky-Pudlak syndrome 3                                       | 2.19E-06 | No  | No  | Yes | No  | No | No  | No  |
| 4286   | MITF    | microphthalmia-associated transcription factor                    | 2.19E-06 | No  | No  | Yes | No  | No | No  | No  |
| 4633   | MYL2    | myosin, light chain 2, regulatory, cardiac, slow                  | 2.19E-06 | No  | No  | Yes | No  | No | No  | No  |
| 10495  | ENOX2   | ecto-NOX disulfide-thiol exchanger 2                              | 2.20E-06 | No  | No  | Yes | No  | No | No  | No  |
| 55266  | TMEM19  | transmembrane protein 19                                          | 2.23E-06 | No  | No  | Yes | No  | No | No  | No  |
| 50515  | CHST11  | carbohydrate (chondroitin 4) sulfotransferase 11                  | 2.24E-06 | Yes | No  | Yes | No  | No | No  | No  |
| 5062   | PAK2    | p21 protein (Cdc42/Rac)-activated kinase 2                        | 2.24E-06 | No  | No  | Yes | No  | No | No  | No  |
| 51725  | FBXO40  | F-box protein 40                                                  | 2.25E-06 | No  | No  | No  | Yes | No | No  | No  |
| 23708  | GSPT2   | G1 to S phase transition 2                                        | 2.25E-06 | No  | No  | Yes | No  | No | No  | No  |
| 64599  | GIGYF1  | GRB10 interacting GYF protein 1                                   | 2.27E-06 | Yes | No  | Yes | No  | No | No  | No  |
| 91392  | ZNF502  | zinc finger protein 502                                           | 2.28E-06 | Yes | No  | Yes | No  | No | No  | No  |
| 10228  | STX6    | syntaxin 6                                                        | 2.28E-06 | Yes | Yes | Yes | No  | No | No  | No  |
| 79977  | GRHL2   | grainyhead-like 2 (Drosophila)                                    | 2.29E-06 | No  | No  | Yes | No  | No | No  | No  |
| 5500   | PPP1CB  | protein phosphatase 1, catalytic subunit, beta isoform            | 2.29E-06 | No  | No  | Yes | No  | No | No  | No  |
| 313    | AOAH    | acyloxycacyl hydrolase (neutrophil)                               | 2.31E-06 | No  | No  | Yes | No  | No | No  | No  |
| 57538  | ALPK3   | alpha-kinase 3                                                    | 2.31E-06 | No  | No  | No  | Yes | No | No  | No  |
| 2629   | GBA     | glucosidase, beta; acid (includes glucosylceramidase)             | 2.32E-06 | No  | No  | No  | Yes | No | No  | No  |
| 27068  | PPA2    | pyrophosphatase (inorganic) 2                                     | 2.32E-06 | No  | No  | Yes | No  | No | No  | No  |
| 6241   | RRM2    | ribonucleotide reductase M2 polypeptide                           | 2.33E-06 | No  | No  | Yes | No  | No | No  | No  |
| 1114   | CHGB    | chromogranin B (secretogranin 1)                                  | 2.33E-06 | No  | No  | Yes | No  | No | No  | No  |
| 375287 | RBM43   | RNA binding motif protein 43                                      | 2.33E-06 | Yes | No  | No  | Yes | No | No  | No  |
| 3290   | HSD11B1 | hydroxysteroid (11-beta) dehydrogenase 1                          | 2.34E-06 | No  | No  | Yes | No  | No | No  | No  |
| 79544  | OR4K1   | olfactory receptor, family 4, subfamily K, member 1               | 2.35E-06 | NA  | No  | Yes | No  | No | No  | No  |
| 1603   | DAD1    | defender against cell death 1                                     | 2.36E-06 | No  | No  | Yes | No  | No | No  | No  |
| 4211   | MEIS1   | Meis homeobox 1                                                   | 2.37E-06 | Yes | No  | No  | Yes | No | Yes | No  |
| 9266   | PSCD2   | pleckstrin homology, Sec7 and coiled-coil domains 2 (cytohesin-2) | 2.37E-06 | No  | No  | No  | Yes | No | No  | No  |
| 22872  | SEC31A  | SEC31 homolog A (S. cerevisiae)                                   | 2.37E-06 | No  | Yes | Yes | No  | No | Yes | Yes |
| 79725  | THAP9   | THAP domain containing 9                                          | 2.37E-06 | No  | No  | No  | Yes | No | Yes | No  |
| 9172   | MYO2    | myomesin (M-protein) 2, 165kDa                                    | 2.37E-06 | No  | No  | No  | Yes | No | No  | No  |
| 23235  | SNF1LK2 | SNF1-like kinase 2                                                | 2.37E-06 | Yes | No  | No  | No  | No | No  | No  |

|        |          |                                                                         |          |     |     |     |     |    |     |     |
|--------|----------|-------------------------------------------------------------------------|----------|-----|-----|-----|-----|----|-----|-----|
| 11313  | LYPLA2   | lysophospholipase II                                                    | 2.38E-06 | No  | No  | Yes | No  | No | No  | No  |
| 10154  | PLXNC1   | plexin C1                                                               | 2.39E-06 | Yes | No  | Yes | No  | No | No  | No  |
| 23082  | PPRC1    | peroxisome proliferator-activated receptor gamma, coactivator-related 1 | 2.39E-06 | Yes | No  | Yes | No  | No | No  | No  |
| 9061   | PAPSS1   | 3-phosphoadenosine 5'-phosphosulfate synthase 1                         | 2.41E-06 | No  | No  | Yes | No  | No | No  | No  |
| 1594   | CYP27B1  | cytochrome P450, family 27, subfamily B, polypeptide 1                  | 2.42E-06 | No  | No  | No  | Yes | No | No  | No  |
| 23126  | POGZ     | pogo transposable element with ZNF domain                               | 2.43E-06 | No  | No  | No  | Yes | No | No  | No  |
| 22862  | FNDC3A   | fibronectin type III domain containing 3A                               | 2.43E-06 | Yes | Yes | Yes | No  | No | Yes | Yes |
| 3570   | IL6R     | interleukin 6 receptor                                                  | 2.44E-06 | Yes | No  | No  | Yes | No | No  | No  |
| 121260 | SLC15A4  | solute carrier family 15, member 4                                      | 2.44E-06 | No  | No  | No  | Yes | No | No  | No  |
| 26258  | PLDN     | pallidin homolog (mouse)                                                | 2.46E-06 | No  | No  | Yes | No  | No | No  | No  |
| 1191   | CLU      | clusterin                                                               | 2.47E-06 | No  | No  | Yes | No  | No | No  | No  |
| 23607  | CD2AP    | CD2-associated protein                                                  | 2.47E-06 | No  | No  | Yes | No  | No | No  | No  |
| 54857  | GDPD2    | glycerophosphodiester phosphodiesterase domain containing 2             | 2.47E-06 | No  | No  | No  | Yes | No | No  | No  |
| 26750  | RPS6KC1  | ribosomal protein S6 kinase, 52kDa, polypeptide 1                       | 2.47E-06 | No  | No  | Yes | No  | No | No  | No  |
| 51023  | MRPS18C  | mitochondrial ribosomal protein S18C                                    | 2.48E-06 | No  | No  | Yes | No  | No | Yes | No  |
| 4706   | NDUFAB1  | NADH dehydrogenase (ubiquinone) 1, alpha/beta subcomplex, 1, 8kDa       | 2.48E-06 | No  | No  | Yes | No  | No | No  | No  |
| 5169   | ENPP3    | ectonucleotide pyrophosphatase/phosphodiesterase 3                      | 2.48E-06 | No  | No  | Yes | No  | No | No  | No  |
| 5527   | PPP2R5C  | protein phosphatase 2, regulatory subunit B, gamma isoform              | 2.48E-06 | No  | No  | Yes | No  | No | No  | No  |
| 5718   | PSMD12   | proteasome (prosome, macropain) 26S subunit, non-ATPase, 12             | 2.49E-06 | No  | No  | Yes | No  | No | Yes | No  |
| 9590   | AKAP12   | A kinase (PRKA) anchor protein (gravin) 12                              | 2.49E-06 | No  | No  | Yes | No  | No | No  | No  |
| 8178   | ELL      | elongation factor RNA polymerase II                                     | 2.50E-06 | Yes | No  | No  | Yes | No | No  | No  |
| 55026  | FAM70A   | family with sequence similarity 70, member A                            | 2.50E-06 | No  | No  | Yes | No  | No | No  | No  |
| 2253   | FGF8     | fibroblast growth factor 8 (androgen-induced)                           | 2.51E-06 | No  | No  | No  | No  | No | No  | No  |
| 64005  | MYO1G    | myosin IG                                                               | 2.51E-06 | Yes | No  | Yes | No  | No | Yes | No  |
| 338382 | RAB7B    | RAB7B, member RAS oncogene family                                       | 2.51E-06 | Yes | No  | Yes | No  | No | No  | No  |
| 56942  | C16orf61 | chromosome 16 open reading frame 61                                     | 2.52E-06 | No  | No  | No  | Yes | No | Yes | No  |
| 10950  | BTG3     | BTG family, member 3                                                    | 2.53E-06 | No  | No  | Yes | No  | No | No  | No  |
| 10611  | PDLIM5   | PDZ and LIM domain 5                                                    | 2.53E-06 | Yes | No  | Yes | No  | No | No  | No  |
| 79602  | ADIPOR2  | adiponectin receptor 2                                                  | 2.54E-06 | No  | No  | Yes | No  | No | No  | No  |
| 92105  | INTS4    | integrator complex subunit 4                                            | 2.55E-06 | No  | No  | Yes | No  | No | No  | No  |
| 51663  | ZFR      | zinc finger RNA binding protein                                         | 2.55E-06 | Yes | No  | No  | Yes | No | No  | No  |
| 55120  | FANCL    | Fanconi anemia, complementation group L                                 | 2.56E-06 | No  | No  | No  | Yes | No | No  | No  |
| 148867 | SLC30A7  | solute carrier family 30 (zinc transporter), member 7                   | 2.57E-06 | Yes | No  | No  | Yes | No | Yes | No  |
| 26054  | SENP6    | SUMO1/sentrin specific peptidase 6                                      | 2.58E-06 | Yes | No  | Yes | No  | No | No  | No  |

|        |           |                                                                                                              |          |     |     |     |     |     |     |    |
|--------|-----------|--------------------------------------------------------------------------------------------------------------|----------|-----|-----|-----|-----|-----|-----|----|
| 7534   | YWHAZ     | tyrosine 3-monooxygenase/tryptophan 5-monooxygenase activation protein, zeta polypeptide                     | 2.59E-06 | No  | No  | No  | No  | No  | No  | No |
| 406    | ARNTL     | aryl hydrocarbon receptor nuclear translocator-like                                                          | 2.59E-06 | Yes | No  | Yes | No  | No  | No  | No |
| 3417   | IDH1      | isocitrate dehydrogenase 1 (NADP+), soluble                                                                  | 2.59E-06 | Yes | No  | Yes | No  | No  | No  | No |
| 221895 | JAZF1     | JAZF zinc finger 1                                                                                           | 2.60E-06 | Yes | Yes | Yes | No  | No  | Yes | No |
| 80201  | HKDC1     | hexokinase domain containing 1                                                                               | 2.61E-06 | No  | No  | Yes | No  | No  | No  | No |
| 201595 | STT3B     | STT3, subunit of the oligosaccharyltransferase complex, homolog B (S. cerevisiae)                            | 2.65E-06 | No  | No  | No  | Yes | No  | No  | No |
| 22866  | CNKSR2    | connector enhancer of kinase suppressor of Ras 2                                                             | 2.66E-06 | Yes | No  | No  | Yes | No  | No  | No |
| 7292   | TNFSF4    | tumor necrosis factor (ligand) superfamily, member 4 (tax-transcriptionally activated glycoprotein 1, 34kDa) | 2.66E-06 | No  | No  | No  | No  | Yes | No  | No |
| 7812   | CSDE1     | cold shock domain containing E1, RNA-binding                                                                 | 2.67E-06 | No  | Yes | Yes | No  | No  | No  | No |
| 6492   | SIM1      | single-minded homolog 1 (Drosophila)                                                                         | 2.68E-06 | Yes | No  | Yes | No  | No  | No  | No |
| 23118  | MAP3K7IP2 | mitogen-activated protein kinase kinase kinase 7 interacting protein 2                                       | 2.68E-06 | Yes | No  | Yes | No  | No  | Yes | No |
| 57404  | CYP20A1   | cytochrome P450, family 20, subfamily A, polypeptide 1                                                       | 2.68E-06 | Yes | No  | Yes | No  | No  | No  | No |
| 84823  | LMNB2     | lamin B2                                                                                                     | 2.68E-06 | No  | No  | Yes | No  | No  | No  | No |
| 9668   | ZNF432    | zinc finger protein 432                                                                                      | 2.72E-06 | Yes | No  | Yes | No  | No  | Yes | No |
| 2258   | FGF13     | fibroblast growth factor 13                                                                                  | 2.73E-06 | No  | No  | Yes | No  | No  | No  | No |
| 3932   | LCK       | lymphocyte-specific protein tyrosine kinase                                                                  | 2.74E-06 | No  | No  | Yes | No  | No  | No  | No |
| 8707   | B3GALT2   | UDP-Gal:betaGlcNAc beta 1,3-galactosyltransferase, polypeptide 2                                             | 2.74E-06 | No  | No  | Yes | No  | No  | No  | No |
| 257194 | NEGR1     | neuronal growth regulator 1                                                                                  | 2.74E-06 | No  | No  | Yes | No  | No  | No  | No |
| 285600 | C5orf36   | chromosome 5 open reading frame 36                                                                           | 2.74E-06 | Yes | No  | Yes | No  | No  | No  | No |
| 202309 | C5orf29   | chromosome 5 open reading frame 29                                                                           | 2.74E-06 | Yes | No  | Yes | No  | No  | No  | No |
| 23219  | FBXO28    | F-box protein 28                                                                                             | 2.74E-06 | No  | No  | Yes | No  | No  | No  | No |
| 23248  | KIAA0460  | KIAA0460                                                                                                     | 2.74E-06 | No  | No  | Yes | No  | No  | No  | No |
| 4004   | LMO1      | LIM domain only 1 (rhombotin 1)                                                                              | 2.74E-06 | No  | No  | No  | Yes | No  | No  | No |
| 8601   | RGS20     | regulator of G-protein signaling 20                                                                          | 2.75E-06 | Yes | No  | Yes | No  | No  | No  | No |
| 3747   | KCNC2     | potassium voltage-gated channel, Shaw-related subfamily, member 2                                            | 2.76E-06 | No  | No  | Yes | No  | No  | No  | No |
| 6885   | MAP3K7    | mitogen-activated protein kinase kinase kinase 7                                                             | 2.76E-06 | No  | No  | Yes | No  | No  | No  | No |
| 51067  | YARS2     | tyrosyl-tRNA synthetase 2, mitochondrial                                                                     | 2.76E-06 | No  | No  | Yes | No  | No  | No  | No |
| 28984  | C13orf15  | chromosome 13 open reading frame 15                                                                          | 2.76E-06 | No  | No  | No  | No  | Yes | No  | No |
| 3628   | INPP1     | inositol polyphosphate-1-phosphatase                                                                         | 2.76E-06 | No  | No  | Yes | No  | No  | No  | No |
| 51184  | GPN3      | GPN-loop GTPase 3                                                                                            | 2.77E-06 | No  | No  | No  | Yes | No  | Yes | No |
| 10048  | RANBP9    | RAN binding protein 9                                                                                        | 2.78E-06 | No  | No  | No  | No  | No  | No  | No |
| 238    | ALK       | anaplastic lymphoma receptor tyrosine kinase                                                                 | 2.79E-06 | No  | No  | No  | Yes | No  | No  | No |
| 9757   | MLL4      | myeloid/lymphoid or mixed-lineage leukemia 4                                                                 | 2.79E-06 | Yes | No  | No  | Yes | No  | No  | No |
| 55652  | FLJ20489  | hypothetical protein FLJ20489                                                                                | 2.81E-06 | No  | No  | Yes | No  | No  | No  | No |

|        |          |                                                                                          |          |     |     |     |     |     |     |     |
|--------|----------|------------------------------------------------------------------------------------------|----------|-----|-----|-----|-----|-----|-----|-----|
| 4724   | NDUFS4   | NADH dehydrogenase (ubiquinone) Fe-S protein 4, 18kDa (NADH-coenzyme Q reductase)        | 2.82E-06 | No  | No  | Yes | No  | No  | No  | No  |
| 7543   | ZFX      | zinc finger protein, X-linked                                                            | 2.82E-06 | No  | No  | Yes | No  | No  | No  | No  |
| 80204  | FBXO11   | F-box protein 11                                                                         | 2.83E-06 | No  | No  | Yes | No  | No  | No  | No  |
| 56062  | KLHL4    | kelch-like 4 (Drosophila)                                                                | 2.83E-06 | Yes | No  | Yes | No  | No  | No  | No  |
| 55689  | YEATS2   | YEATS domain containing 2                                                                | 2.84E-06 | No  | No  | Yes | No  | No  | No  | No  |
| 2585   | GALK2    | galactokinase 2                                                                          | 2.84E-06 | No  |
| 9318   | COPS2    | COP9 constitutive photomorphogenic homolog subunit 2 (Arabidopsis)                       | 2.84E-06 | No  |
| 79053  | ALG8     | asparagine-linked glycosylation 8 homolog (S. cerevisiae, alpha-1,3-glucosyltransferase) | 2.85E-06 | No  | No  | Yes | No  | No  | No  | No  |
| 9317   | PTER     | phosphotriesterase related                                                               | 2.86E-06 | No  | No  | Yes | No  | No  | No  | No  |
| 1874   | E2F4     | E2F transcription factor 4, p107/p130-binding                                            | 2.87E-06 | No  | No  | Yes | No  | No  | No  | No  |
| 79777  | ACBD4    | acyl-Coenzyme A binding domain containing 4                                              | 2.87E-06 | No  | No  | No  | Yes | No  | No  | No  |
| 25782  | RAB3GAP2 | RAB3 GTPase activating protein subunit 2 (non-catalytic)                                 | 2.87E-06 | No  | Yes | Yes | No  | No  | No  | No  |
| 286148 | DPY19L4  | dpy-19-like 4 (C. elegans)                                                               | 2.89E-06 | Yes | No  | Yes | No  | No  | No  | No  |
| 9760   | TOX      | thymocyte selection-associated high mobility group box                                   | 2.89E-06 | No  | No  | Yes | No  | No  | No  | No  |
| 6102   | RP2      | retinitis pigmentosa 2 (X-linked recessive)                                              | 2.91E-06 | No  | No  | Yes | No  | No  | No  | No  |
| 50640  | PNPLA8   | patatin-like phospholipase domain containing 8                                           | 2.91E-06 | No  | No  | Yes | No  | No  | No  | No  |
| 27022  | FOXO3    | forkhead box D3                                                                          | 2.92E-06 | Yes | No  | Yes | No  | No  | No  | No  |
| 10806  | SDCCAG8  | serologically defined colon cancer antigen 8                                             | 2.92E-06 | Yes | No  | No  | No  | No  | No  | No  |
| 128077 | LIX1L    | Lix1 homolog (mouse)-like                                                                | 2.92E-06 | Yes | No  | No  | Yes | No  | No  | No  |
| 84265  | POLR3GL  | polymerase (RNA) III (DNA directed) polypeptide G (32kD)-like                            | 2.92E-06 | No  | No  | No  | Yes | No  | Yes | No  |
| 9141   | PDCD5    | programmed cell death 5                                                                  | 2.92E-06 | Yes | No  | Yes | No  | No  | No  | No  |
| 84896  | ATAD1    | ATPase family, AAA domain containing 1                                                   | 2.93E-06 | No  | No  | Yes | No  | No  | Yes | No  |
| 5289   | PIK3C3   | phosphoinositide-3-kinase, class 3                                                       | 2.93E-06 | Yes | No  | No  | Yes | No  | No  | No  |
| 9435   | CHST2    | carbohydrate (N-acetylglucosamine-6-O) sulfotransferase 2                                | 2.94E-06 | Yes | No  | No  | No  | Yes | No  | No  |
| 23008  | KIAA0265 | KIAA0265 protein                                                                         | 2.94E-06 | Yes | No  | Yes | No  | No  | No  | No  |
| 4974   | OMG      | oligodendrocyte myelin glycoprotein                                                      | 2.96E-06 | No  | No  | Yes | No  | No  | No  | No  |
| 84671  | ZNF347   | zinc finger protein 347                                                                  | 2.96E-06 | No  | No  | Yes | No  | No  | No  | No  |
| 23005  | MAPKBP1  | mitogen-activated protein kinase binding protein 1                                       | 2.96E-06 | Yes | No  | No  | Yes | No  | No  | No  |
| 6389   | SDHA     | succinate dehydrogenase complex, subunit A, flavoprotein (Fp)                            | 2.97E-06 | No  | No  | No  | Yes | No  | No  | No  |
| 402    | ARL2     | ADP-ribosylation factor-like 2                                                           | 2.98E-06 | No  | No  | No  | Yes | No  | No  | No  |
| 7128   | TNFAIP3  | tumor necrosis factor, alpha-induced protein 3                                           | 2.98E-06 | Yes | No  | Yes | No  | No  | Yes | Yes |
| 9476   | NAPSA    | napsin A aspartic peptidase                                                              | 2.98E-06 | No  | No  | No  | Yes | No  | No  | No  |
| 203068 | TUBB     | tubulin, beta                                                                            | 2.99E-06 | No  | No  | Yes | No  | No  | No  | No  |
| 7851   | MALL     | mal, T-cell differentiation protein-like                                                 | 2.99E-06 | No  | Yes | No  | Yes | No  | No  | No  |



|        |          |                                                                                                           |          |     |     |     |     |     |     |    |
|--------|----------|-----------------------------------------------------------------------------------------------------------|----------|-----|-----|-----|-----|-----|-----|----|
| 374467 | C12orf63 | chromosome 12 open reading frame 63                                                                       | 3.01E-06 | NA  | No  | Yes | No  | No  | No  | No |
| 220    | ALDH1A3  | aldehyde dehydrogenase 1 family, member A3                                                                | 3.04E-06 | Yes | No  | No  | No  | No  | No  | No |
| 1540   | CYLD     | cylindromatosis (turban tumor syndrome)                                                                   | 3.04E-06 | Yes | Yes | No  | No  | No  | No  | No |
| 64131  | XYLT1    | xylosyltransferase 1                                                                                      | 3.04E-06 | No  | Yes | No  | Yes | No  | No  | No |
| 148641 | SLC35F3  | solute carrier family 35, member F3                                                                       | 3.04E-06 | No  | No  | Yes | No  | No  | No  | No |
| 80221  | ACSF2    | acyl-CoA synthetase family member 2                                                                       | 3.05E-06 | No  | No  | No  | Yes | No  | Yes | No |
| 79192  | IRX1     | irouquois homeobox 1                                                                                      | 3.06E-06 | No  | No  | Yes | No  | No  | No  | No |
| 10369  | CACNG2   | calcium channel, voltage-dependent, gamma subunit 2                                                       | 3.06E-06 | Yes | No  | Yes | No  | No  | No  | No |
| 2306   | FOXM1    | forkhead box M1                                                                                           | 3.07E-06 | No  | No  | No  | Yes | No  | No  | No |
| 54800  | KLHL24   | kelch-like 24 (Drosophila)                                                                                | 3.07E-06 | No  | No  | Yes | No  | No  | No  | No |
| 10343  | PKDREJ   | polycystic kidney disease (polycystin) and REJ homolog (sperm receptor for egg jelly homolog, sea urchin) | 3.07E-06 | No  | No  | Yes | No  | No  | No  | No |
| 811    | CALR     | calreticulin                                                                                              | 3.09E-06 | No  | Yes | No  | Yes | No  | No  | No |
| 10314  | LANCL1   | LanC lantibiotic synthetase component C-like 1 (bacterial)                                                | 3.11E-06 | No  | No  | Yes | No  | No  | No  | No |
| 116285 | ACSM1    | acyl-CoA synthetase medium-chain family member 1                                                          | 3.12E-06 | Yes | No  | No  | No  | Yes | No  | No |
| 6666   | SOX12    | SRY (sex determining region Y)-box 12                                                                     | 3.13E-06 | No  | No  | No  | Yes | No  | No  | No |
| 51512  | GTSE1    | G-2 and S-phase expressed 1                                                                               | 3.14E-06 | No  | No  | Yes | No  | No  | No  | No |
| 84256  | FLYWCH1  | FLYWCH-type zinc finger 1                                                                                 | 3.14E-06 | No  | No  | No  | Yes | No  | No  | No |
| 10322  | SMYD5    | SMYD family member 5                                                                                      | 3.15E-06 | No  | No  | Yes | No  | No  | No  | No |
| 2331   | FIMOD    | fibromodulin                                                                                              | 3.15E-06 | No  | No  | No  | Yes | No  | No  | No |
| 145258 | GSC      | gooseoid homeobox                                                                                         | 3.15E-06 | No  | No  | Yes | No  | No  | No  | No |
| 30827  | CXXC1    | CXXC finger 1 (PHD domain)                                                                                | 3.17E-06 | Yes | No  | Yes | No  | No  | No  | No |
| 9321   | TRIP11   | thyroid hormone receptor interactor 11                                                                    | 3.17E-06 | No  | No  | No  | Yes | No  | Yes | No |
| 1021   | CDK6     | cyclin-dependent kinase 6                                                                                 | 3.18E-06 | No  | No  | Yes | No  | No  | No  | No |
| 51455  | REV1     | REV1 homolog (S. cerevisiae)                                                                              | 3.18E-06 | No  | No  | Yes | No  | No  | No  | No |
| 6645   | SNTB2    | syntrophin, beta 2 (dystrophin-associated protein A1, 59kDa, basic component 2)                           | 3.19E-06 | No  | No  | No  | Yes | No  | No  | No |
| 253175 | CDY1B    | chromodomain protein, Y-linked, 1B                                                                        | 3.19E-06 | No  | No  | Yes | No  | No  | No  | No |
| 10400  | PEMT     | phosphatidylethanolamine N-methyltransferase                                                              | 3.19E-06 | Yes | No  | No  | Yes | No  | No  | No |
| 57623  | ZFAT     | zinc finger and AT hook domain containing                                                                 | 3.22E-06 | No  | No  | Yes | No  | No  | No  | No |
| 4357   | MPST     | mercaptopyruvate sulfurtransferase                                                                        | 3.24E-06 | No  | No  | No  | No  | Yes | No  | No |
| 5516   | PPP2CB   | protein phosphatase 2 (formerly 2A), catalytic subunit, beta isoform                                      | 3.24E-06 | No  | No  | Yes | No  | No  | No  | No |
| 23169  | SLC35D1  | solute carrier family 35 (UDP-glucuronic acid/UDP-N-acetylgalactosamine dual transporter), member 1       | 3.24E-06 | No  | No  | No  | No  | No  | Yes | No |
| 51582  | AZIN1    | antizyme inhibitor 1                                                                                      | 3.27E-06 | No  | Yes | No  | Yes | No  | No  | No |
| 554251 | FBXO48   | F-box protein 48                                                                                          | 3.27E-06 | NA  | No  | No  | Yes | No  | No  | No |
| 4249   | MGAT5    | mannosyl (alpha-1,6-)-glycoprotein beta-1,6-N-acetylglucosaminyltransferase                               | 3.28E-06 | No  | No  | Yes | No  | No  | No  | No |

|        |          |                                                                                           |          |     |     |     |     |     |     |    |
|--------|----------|-------------------------------------------------------------------------------------------|----------|-----|-----|-----|-----|-----|-----|----|
| 5341   | PLEK     | pleckstrin                                                                                | 3.29E-06 | No  | No  | Yes | No  | No  | No  | No |
| 10908  | PNPLA6   | patatin-like phospholipase domain containing 6                                            | 3.29E-06 | Yes | No  | No  | No  | Yes | No  | No |
| 81847  | RNF146   | ring finger protein 146                                                                   | 3.29E-06 | No  | No  | Yes | No  | No  | No  | No |
| 5684   | PSMA3    | proteasome (prosome, macropain) subunit, alpha type, 3                                    | 3.29E-06 | No  | No  | No  | Yes | No  | Yes | No |
| 30849  | PIK3R4   | phosphoinositide-3-kinase, regulatory subunit 4                                           | 3.30E-06 | No  | No  | Yes | No  | No  | No  | No |
| 9203   | ZMYM3    | zinc finger, MYM-type 3                                                                   | 3.30E-06 | No  | Yes | Yes | No  | No  | No  | No |
| 346389 | 7A5      | putative binding protein 7a5                                                              | 3.31E-06 | Yes | No  | No  | Yes | No  | Yes | No |
| 79007  | DBNDD1   | dysbindin (dystrobrevin binding protein 1) domain containing 1                            | 3.33E-06 | No  | No  | Yes | No  | No  | No  | No |
| 285671 | RNF180   | ring finger protein 180                                                                   | 3.34E-06 | NA  | No  | Yes | No  | No  | No  | No |
| 3858   | KRT10    | keratin 10 (epidermolytic hyperkeratosis; keratosis palmaris et plantaris)                | 3.34E-06 | No  | No  | Yes | No  | No  | No  | No |
| 79675  | FASTKD1  | FAST kinase domains 1                                                                     | 3.35E-06 | No  | No  | Yes | No  | No  | No  | No |
| 3512   | IGJ      | immunoglobulin J polypeptide, linker protein for immunoglobulin alpha and mu polypeptides | 3.35E-06 | No  | No  | Yes | No  | No  | No  | No |
| 138649 | ANKRD19  | ankyrin repeat domain 19                                                                  | 3.39E-06 | No  | No  | No  | No  | No  | No  | No |
| 79998  | ANKRD53  | ankyrin repeat domain 53                                                                  | 3.41E-06 | No  | No  | No  | Yes | No  | No  | No |
| 4627   | MYH9     | myosin, heavy chain 9, non-muscle                                                         | 3.41E-06 | No  | No  | No  | Yes | No  | No  | No |
| 2778   | GNAS     | GNAS complex locus                                                                        | 3.41E-06 | No  | No  | No  | No  | No  | No  | No |
| 222068 | TMED4    | transmembrane emp24 protein transport domain containing 4                                 | 3.41E-06 | No  | Yes | No  | No  | No  | No  | No |
| 63826  | SRR      | serine racemase                                                                           | 3.43E-06 | Yes | No  | Yes | No  | No  | No  | No |
| 10473  | HMGN4    | high mobility group nucleosomal binding domain 4                                          | 3.46E-06 | Yes | No  | No  | No  | Yes | No  | No |
| 89849  | ATG16L2  | ATG16 autophagy related 16-like 2 (S. cerevisiae)                                         | 3.48E-06 | Yes | No  | No  | No  | Yes | No  | No |
| 339122 | RAB43    | RAB43, member RAS oncogene family                                                         | 3.49E-06 | Yes | No  | Yes | No  | No  | No  | No |
| 79869  | FLJ12529 | pre-mRNA cleavage factor I, 59 kDa subunit                                                | 3.49E-06 | No  | No  | No  | Yes | No  | Yes | No |
| 54949  | C11orf79 | chromosome 11 open reading frame 79                                                       | 3.49E-06 | No  | No  | No  | Yes | No  | Yes | No |
| 9577   | BRE      | brain and reproductive organ-expressed (TNFRSF1A modulator)                               | 3.49E-06 | No  | Yes | Yes | No  | No  | Yes | No |
| 10808  | HSPH1    | heat shock 105kDa/110kDa protein 1                                                        | 3.51E-06 | No  | No  | No  | Yes | No  | No  | No |
| 338674 | OR5F1    | olfactory receptor, family 5, subfamily F, member 1                                       | 3.53E-06 | NA  | No  | Yes | No  | No  | No  | No |
| 166378 | SPATA5   | spermatogenesis associated 5                                                              | 3.54E-06 | No  | No  | Yes | No  | No  | Yes | No |
| 5172   | SLC26A4  | solute carrier family 26, member 4                                                        | 3.54E-06 | No  | No  | No  | Yes | No  | Yes | No |
| 54778  | RNF111   | ring finger protein 111                                                                   | 3.55E-06 | No  | No  | No  | Yes | No  | No  | No |
| 10991  | SLC38A3  | solute carrier family 38, member 3                                                        | 3.57E-06 | No  | No  | Yes | No  | No  | No  | No |
| 85465  | SELI     | selenoprotein I                                                                           | 3.60E-06 | No  | No  | Yes | No  | No  | No  | No |
| 219743 | TYSND1   | trypsin domain containing 1                                                               | 3.61E-06 | No  | No  | No  | No  | Yes | No  | No |
| 7335   | UBE2V1   | ubiquitin-conjugating enzyme E2 variant 1                                                 | 3.62E-06 | NA  | No  | Yes | No  | No  | No  | No |
| 489    | ATP2A3   | ATPase, Ca++ transporting, ubiquitous                                                     | 3.62E-06 | No  | No  | No  | Yes | No  | No  | No |

|        |         |                                                                        |          |     |    |     |     |    |     |    |
|--------|---------|------------------------------------------------------------------------|----------|-----|----|-----|-----|----|-----|----|
| 23705  | CADM1   | cell adhesion molecule 1                                               | 3.62E-06 | No  | No | Yes | No  | No | No  | No |
| 81539  | SLC38A1 | solute carrier family 38, member 1                                     | 3.64E-06 | Yes | No | Yes | No  | No | No  | No |
| 6272   | SORT1   | sortilin 1                                                             | 3.65E-06 | No  | No | Yes | No  | No | No  | No |
| 6171   | RPL41   | ribosomal protein L41                                                  | 3.67E-06 | NA  | No | No  | Yes | No | Yes | No |
| 5467   | PPARD   | peroxisome proliferator-activated receptor delta                       | 3.68E-06 | Yes | No | No  | Yes | No | No  | No |
| 3516   | RBPJ    | recombination signal binding protein for immunoglobulin kappa J region | 3.69E-06 | No  | No | Yes | No  | No | No  | No |
| 8128   | ST8SIA2 | ST8 alpha-N-acetylneuraminide alpha-2,8-sialyltransferase 2            | 3.69E-06 | No  | No | Yes | No  | No | No  | No |
| 23639  | LRR06   | leucine rich repeat containing 6                                       | 3.72E-06 | No  | No | No  | Yes | No | No  | No |
| 708    | C1QBP   | complement component 1, q subcomponent binding protein                 | 3.74E-06 | No  | No | No  | Yes | No | No  | No |
| 6580   | SLC22A1 | solute carrier family 22 (organic cation transporter), member 1        | 3.75E-06 | No  | No | No  | Yes | No | No  | No |
| 57459  | GATAD2B | GATA zinc finger domain containing 2B                                  | 3.76E-06 | Yes | No | Yes | No  | No | No  | No |
| 57379  | AICDA   | activation-induced cytidine deaminase                                  | 3.78E-06 | No  | No | Yes | No  | No | No  | No |
| 60490  | PPCDC   | phosphopantothencysteine decarboxylase                                 | 3.78E-06 | No  | No | No  | Yes | No | No  | No |
| 83941  | TM2D1   | TM2 domain containing 1                                                | 3.80E-06 | Yes | No | Yes | No  | No | No  | No |
| 2296   | FOXC1   | forkhead box C1                                                        | 3.80E-06 | No  | No | Yes | No  | No | No  | No |
| 666    | BOK     | BCL2-related ovarian killer                                            | 3.80E-06 | No  | No | Yes | No  | No | No  | No |
| 182    | JAG1    | jagged 1 (Alagille syndrome)                                           | 3.81E-06 | No  | No | Yes | No  | No | No  | No |
| 7430   | EZR     | ezrin                                                                  | 3.82E-06 | No  | No | Yes | No  | No | No  | No |
| 23081  | JMJ2C   | jumonji domain containing 2C                                           | 3.83E-06 | No  | No | Yes | No  | No | No  | No |
| 7764   | ZNF217  | zinc finger protein 217                                                | 3.83E-06 | Yes | No | Yes | No  | No | No  | No |
| 54581  | SCAND2  | SCAN domain containing 2                                               | 3.87E-06 | No  | No | Yes | No  | No | No  | No |
| 6776   | STAT5A  | signal transducer and activator of transcription 5A                    | 3.87E-06 | Yes | No | No  | Yes | No | No  | No |
| 129642 | MBOAT2  | membrane bound O-acyltransferase domain containing 2                   | 3.88E-06 | No  | No | Yes | No  | No | No  | No |
| 285555 | C4orf37 | chromosome 4 open reading frame 37                                     | 3.89E-06 | No  | No | Yes | No  | No | No  | No |
| 5570   | PKIB    | protein kinase (cAMP-dependent, catalytic) inhibitor beta              | 3.93E-06 | No  | No | Yes | No  | No | Yes | No |
| 51389  | RWDD1   | RWD domain containing 1                                                | 3.93E-06 | No  | No | No  | Yes | No | No  | No |
| 388585 | HES5    | hairy and enhancer of split 5 (Drosophila)                             | 3.96E-06 | No  | No | No  | No  | No | No  | No |
| 2189   | FANCG   | Fanconi anemia, complementation group G                                | 3.96E-06 | No  | No | No  | Yes | No | No  | No |
| 115761 | ARL11   | ADP-ribosylation factor-like 11                                        | 3.97E-06 | No  | No | Yes | No  | No | No  | No |
| 27071  | DAPP1   | dual adaptor of phosphotyrosine and 3-phosphoinositides                | 3.97E-06 | No  | No | Yes | No  | No | No  | No |
| 139341 | FUNDC1  | FUN14 domain containing 1                                              | 4.00E-06 | No  | No | Yes | No  | No | No  | No |
| 5646   | PRSS3   | protease, serine, 3                                                    | 4.01E-06 | No  | No | No  | Yes | No | No  | No |
| 8492   | PRSS12  | protease, serine, 12 (neurotrypsin, motopsin)                          | 4.01E-06 | No  | No | Yes | No  | No | No  | No |
| 431705 | ASTL    | astacin-like metallo-endopeptidase (M12 family)                        | 4.01E-06 | NA  | No | No  | Yes | No | No  | No |

|        |          |                                                                                                     |          |     |     |     |     |     |     |    |
|--------|----------|-----------------------------------------------------------------------------------------------------|----------|-----|-----|-----|-----|-----|-----|----|
| 10213  | PSMD14   | proteasome (prosome, macropain) 26S subunit, non-ATPase, 14                                         | 4.02E-06 | No  | No  | Yes | No  | No  | No  | No |
| 8428   | STK24    | serine/threonine kinase 24 (STE20 homolog, yeast)                                                   | 4.02E-06 | No  | No  | No  | No  | Yes | No  | No |
| 1830   | DSG3     | desmoglein 3 (pemphigus vulgaris antigen)                                                           | 4.03E-06 | No  | No  | Yes | No  | No  | No  | No |
| 54102  | CLIC6    | chloride intracellular channel 6                                                                    | 4.04E-06 | No  | No  | Yes | No  | No  | No  | No |
| 55577  | NAGK     | N-acetylglucosamine kinase                                                                          | 4.04E-06 | No  | No  | No  | Yes | No  | No  | No |
| 25813  | SAMM50   | sorting and assembly machinery component 50 homolog (S. cerevisiae)                                 | 4.04E-06 | No  | No  | No  | Yes | No  | No  | No |
| 2354   | FOSB     | FBJ murine osteosarcoma viral oncogene homolog B                                                    | 4.05E-06 | Yes | No  | Yes | No  | No  | No  | No |
| 7358   | UGDH     | UDP-glucose dehydrogenase                                                                           | 4.05E-06 | No  | Yes | Yes | No  | No  | No  | No |
| 26819  | SNORD32A | small nucleolar RNA, C/D box 32A                                                                    | 4.07E-06 | NA  | No  | Yes | No  | No  | No  | No |
| 51164  | DCTN4    | dynactin 4 (p62)                                                                                    | 4.10E-06 | No  | No  | Yes | No  | No  | No  | No |
| 8436   | SDPR     | serum deprivation response (phosphatidylserine binding protein)                                     | 4.11E-06 | No  | No  | No  | Yes | No  | No  | No |
| 9308   | CD83     | CD83 molecule                                                                                       | 4.13E-06 | Yes | No  | Yes | No  | No  | No  | No |
| 6733   | SRPK2    | SFRS protein kinase 2                                                                               | 4.13E-06 | Yes | Yes | Yes | No  | No  | No  | No |
| 7161   | TP73     | tumor protein p73                                                                                   | 4.14E-06 | No  | No  | Yes | No  | No  | No  | No |
| 49856  | WDR8     | WD repeat domain 8                                                                                  | 4.14E-06 | No  | No  | Yes | No  | No  | No  | No |
| 8894   | EIF2S2   | eukaryotic translation initiation factor 2, subunit 2 beta, 38kDa                                   | 4.14E-06 | No  | No  | Yes | No  | No  | No  | No |
| 934    | CD24     | CD24 molecule                                                                                       | 4.15E-06 | Yes | No  | Yes | No  | No  | No  | No |
| 8611   | PPAP2A   | phosphatidic acid phosphatase type 2A                                                               | 4.15E-06 | No  | No  | Yes | No  | No  | No  | No |
| 4725   | NDUFS5   | NADH dehydrogenase (ubiquinone) Fe-S protein 5, 15kDa (NADH-coenzyme Q reductase)                   | 4.16E-06 | No  | No  | No  | Yes | No  | No  | No |
| 115353 | LRRC42   | leucine rich repeat containing 42                                                                   | 4.16E-06 | No  | No  | Yes | No  | No  | No  | No |
| 10560  | SLC19A2  | solute carrier family 19 (thiamine transporter), member 2                                           | 4.16E-06 | No  | No  | Yes | No  | No  | No  | No |
| 8925   | HERC1    | hect (homologous to the E6-AP (UBE3A) carboxyl terminus) domain and RCC1 (CHC1)-like domain (RLD) 1 | 4.17E-06 | No  | No  | Yes | No  | No  | No  | No |
| 3295   | HSD17B4  | hydroxysteroid (17-beta) dehydrogenase 4                                                            | 4.18E-06 | No  | No  | Yes | No  | No  | No  | No |
| 2107   | ETF1     | eukaryotic translation termination factor 1                                                         | 4.20E-06 | No  | No  | No  | No  | Yes | No  | No |
| 23387  | KIAA0999 | KIAA0999 protein                                                                                    | 4.20E-06 | Yes | No  | Yes | No  | No  | No  | No |
| 8493   | PPM1D    | protein phosphatase 1D magnesium-dependent, delta isoform                                           | 4.24E-06 | No  | No  | No  | Yes | No  | No  | No |
| 84811  | BUD13    | BUD13 homolog (S. cerevisiae)                                                                       | 4.26E-06 | No  | No  | No  | Yes | No  | No  | No |
| 3142   | HLX      | H2.0-like homeobox                                                                                  | 4.26E-06 | Yes | No  | Yes | No  | No  | No  | No |
| 221391 | OPN5     | opsin 5                                                                                             | 4.26E-06 | No  | No  | Yes | No  | No  | No  | No |
| 28513  | CDH19    | cadherin 19, type 2                                                                                 | 4.27E-06 | No  | No  | Yes | No  | No  | No  | No |
| 9469   | CHST3    | carbohydrate (chondroitin 6) sulfotransferase 3                                                     | 4.30E-06 | No  | No  | No  | Yes | No  | No  | No |
| 1967   | EIF2B1   | eukaryotic translation initiation factor 2B, subunit 1 alpha, 26kDa                                 | 4.30E-06 | No  | No  | Yes | No  | No  | No  | No |
| 2004   | ELK3     | ELK3, ETS-domain protein (SRF accessory protein 2)                                                  | 4.31E-06 | No  | No  | Yes | No  | No  | No  | No |
| 55038  | CDC44    | cell division cycle associated 4                                                                    | 4.31E-06 | No  | No  | No  | No  | No  | Yes | No |

|        |         |                                                                                                |          |     |     |     |     |     |     |    |    |
|--------|---------|------------------------------------------------------------------------------------------------|----------|-----|-----|-----|-----|-----|-----|----|----|
| 50626  | CYHR1   | cysteine/histidine-rich 1                                                                      | 4.34E-06 | Yes | No  | No  | No  | No  | No  | No | No |
| 374918 | IGFL1   | IGF-like family member 1                                                                       | 4.36E-06 | Yes | No  | Yes | No  | No  | No  | No | No |
| 26031  | OSBPL3  | oxysterol binding protein-like 3                                                               | 4.36E-06 | No  | No  | No  | Yes | No  | Yes | No | No |
| 11043  | MID2    | midline 2                                                                                      | 4.38E-06 | No  | No  | No  | Yes | No  | No  | No | No |
| 6532   | SLC6A4  | solute carrier family 6 (neurotransmitter transporter, serotonin), member 4                    | 4.39E-06 | No  | No  | No  | Yes | No  | Yes | No | No |
| 2735   | GLI1    | glioma-associated oncogene homolog 1 (zinc finger protein)                                     | 4.39E-06 | Yes | No  | No  | Yes | No  | Yes | No | No |
| 129401 | NUP35   | nucleoporin 35kDa                                                                              | 4.39E-06 | No  | No  | Yes | No  | No  | No  | No | No |
| 6397   | SEC14L1 | SEC14-like 1 (S. cerevisiae)                                                                   | 4.39E-06 | No  | Yes | Yes | No  | No  | No  | No | No |
| 54704  | PPM2C   | protein phosphatase 2C, magnesium-dependent, catalytic subunit                                 | 4.40E-06 | Yes | No  | Yes | No  | No  | Yes | No | No |
| 7852   | CXCR4   | chemokine (C-X-C motif) receptor 4                                                             | 4.40E-06 | No  | No  | No  | No  | Yes | Yes | No | No |
| 506    | ATP5B   | ATP synthase, H+ transporting, mitochondrial F1 complex, beta polypeptide                      | 4.41E-06 | No  | No  | No  | Yes | No  | No  | No | No |
| 57617  | VPS18   | vacuolar protein sorting 18 homolog (S. cerevisiae)                                            | 4.44E-06 | No  | No  | Yes | No  | No  | No  | No | No |
| 286826 | LIN9    | lin-9 homolog (C. elegans)                                                                     | 4.45E-06 | No  | No  | Yes | No  | No  | No  | No | No |
| 10667  | FARS2   | phenylalanyl-tRNA synthetase 2, mitochondrial                                                  | 4.48E-06 | No  | No  | Yes | No  | No  | Yes | No | No |
| 54221  | SNTG2   | syntrophin, gamma 2                                                                            | 4.48E-06 | Yes | No  | No  | Yes | No  | No  | No | No |
| 3276   | PRMT1   | protein arginine methyltransferase 1                                                           | 4.50E-06 | No  | No  | Yes | No  | No  | No  | No | No |
| 137964 | AGPAT6  | 1-acylglycerol-3-phosphate O-acyltransferase 6 (lysophosphatidic acid acyltransferase, zeta)   | 4.50E-06 | No  | No  | Yes | No  | No  | No  | No | No |
| 904    | CCNT1   | cyclin T1                                                                                      | 4.50E-06 | No  | No  | Yes | No  | No  | No  | No | No |
| 5471   | PPAT    | phosphoribosyl pyrophosphate amidotransferase                                                  | 4.50E-06 | No  | No  | Yes | No  | No  | No  | No | No |
| 387921 | NHLRC3  | NHL repeat containing 3                                                                        | 4.52E-06 | Yes | Yes | Yes | No  | No  | Yes | No | No |
| 23186  | RCOR1   | REST corepressor 1                                                                             | 4.52E-06 | No  | No  | No  | Yes | No  | No  | No | No |
| 29066  | ZC3H7A  | zinc finger CCCH-type containing 7A                                                            | 4.55E-06 | No  | No  | Yes | No  | No  | Yes | No | No |
| 54894  | RNF43   | ring finger protein 43                                                                         | 4.58E-06 | No  | No  | Yes | No  | No  | No  | No | No |
| 115992 | RNF166  | ring finger protein 166                                                                        | 4.58E-06 | Yes | No  | No  | Yes | No  | No  | No | No |
| 3281   | HSBP1   | heat shock factor binding protein 1                                                            | 4.58E-06 | No  | No  | Yes | No  | No  | No  | No | No |
| 83853  | ROPN1L  | ropporin 1-like                                                                                | 4.58E-06 | No  | No  | Yes | No  | No  | No  | No | No |
| 3108   | HLA-DMA | major histocompatibility complex, class II, DM alpha                                           | 4.60E-06 | No  | No  | Yes | No  | No  | No  | No | No |
| 84316  | LSMD1   | LSM domain containing 1                                                                        | 4.61E-06 | No  | No  | Yes | No  | No  | Yes | No | No |
| 50809  | HP1BP3  | heterochromatin protein 1, binding protein 3                                                   | 4.62E-06 | No  | No  | Yes | No  | No  | No  | No | No |
| 57630  | SH3RF1  | SH3 domain containing ring finger 1                                                            | 4.62E-06 | No  | No  | No  | No  | Yes | No  | No | No |
| 9877   | ZC3H11A | zinc finger CCCH-type containing 11A                                                           | 4.64E-06 | No  | No  | Yes | No  | No  | No  | No | No |
| 5783   | PTPN13  | protein tyrosine phosphatase, non-receptor type 13 (APO-1/CD95 (Fas)-associated phosphatase)   | 4.64E-06 | No  | No  | No  | No  | Yes | No  | No | No |
| 51809  | GALNT7  | UDP-N-acetyl-alpha-D-galactosamine:polypeptide N-acetylgalactosaminyltransferase 7 (GalNAc-T7) | 4.64E-06 | Yes | No  | Yes | No  | No  | No  | No | No |
| 54788  | DNAJB12 | DnaJ (Hsp40) homolog, subfamily B, member 12                                                   | 4.67E-06 | No  | No  | No  | Yes | No  | No  | No | No |

|        |         |                                                                                         |          |     |     |     |     |     |     |     |
|--------|---------|-----------------------------------------------------------------------------------------|----------|-----|-----|-----|-----|-----|-----|-----|
| 22944  | KIN     | KIN, antigenic determinant of recA protein homolog (mouse)                              | 4.68E-06 | Yes | No  | No  | Yes | No  | No  | No  |
| 84056  | KATNAL1 | katarin p60 subunit A-like 1                                                            | 4.70E-06 | No  | Yes | No  | Yes | No  | No  | No  |
| 23090  | ZNF423  | zinc finger protein 423                                                                 | 4.70E-06 | No  | No  | Yes | No  | No  | No  | No  |
| 58492  | ZNF77   | zinc finger protein 77                                                                  | 4.74E-06 | No  | No  | Yes | No  | No  | No  | No  |
| 29107  | NXT1    | NTF2-like export factor 1                                                               | 4.74E-06 | Yes | No  | Yes | No  | No  | Yes | No  |
| 284114 | TMEM102 | transmembrane protein 102                                                               | 4.74E-06 | No  | No  | No  | Yes | No  | No  | No  |
| 10671  | DCTN6   | dynactin 6                                                                              | 4.75E-06 | No  | No  | No  | Yes | No  | Yes | No  |
| 27230  | SERP1   | stress-associated endoplasmic reticulum protein 1                                       | 4.76E-06 | No  | No  | No  | No  | Yes | No  | No  |
| 83939  | EIF2A   | eukaryotic translation initiation factor 2A, 65kDa                                      | 4.76E-06 | No  | No  | No  | No  | Yes | No  | No  |
| 4150   | MAZ     | MYC-associated zinc finger protein (purine-binding transcription factor)                | 4.77E-06 | No  | No  | Yes | No  | No  | No  | No  |
| 10049  | DNAJB6  | DnaJ (Hsp40) homolog, subfamily B, member 6                                             | 4.78E-06 | Yes | No  | Yes | No  | No  | No  | No  |
| 8001   | GLRA3   | glycine receptor, alpha 3                                                               | 4.82E-06 | No  | No  | Yes | No  | No  | No  | No  |
| 5378   | PMS1    | PMS1 postmeiotic segregation increased 1 (S. cerevisiae)                                | 4.83E-06 | No  | No  | Yes | No  | No  | No  | No  |
| 94101  | ORMDL1  | ORM1-like 1 (S. cerevisiae)                                                             | 4.83E-06 | No  | No  | Yes | No  | No  | No  | No  |
| 57084  | SLC17A6 | solute carrier family 17 (sodium-dependent inorganic phosphate cotransporter), member 6 | 4.86E-06 | No  | No  | Yes | No  | No  | No  | No  |
| 2195   | FAT     | FAT tumor suppressor homolog 1 (Drosophila)                                             | 4.88E-06 | No  | No  | Yes | No  | No  | No  | No  |
| 1002   | CDH4    | cadherin 4, type 1, R-cadherin (retinal)                                                | 4.91E-06 | No  |
| 25768  | PRPF40B | PRP40 pre-mRNA processing factor 40 homolog B (S. cerevisiae)                           | 4.94E-06 | Yes | No  | No  | Yes | No  | Yes | No  |
| 10296  | MAEA    | macrophage erythroblast attacher                                                        | 4.94E-06 | Yes | No  | No  | No  | No  | No  | No  |
| 162494 | RHBDL3  | rhomboid, veinlet-like 3 (Drosophila)                                                   | 4.96E-06 | Yes | No  | No  | No  | Yes | No  | No  |
| 51311  | TLR8    | toll-like receptor 8                                                                    | 4.98E-06 | No  | No  | Yes | No  | No  | No  | No  |
| 51642  | MRPL48  | mitochondrial ribosomal protein L48                                                     | 4.99E-06 | No  | No  | Yes | No  | No  | No  | No  |
| 3915   | LAMC1   | laminin, gamma 1 (formerly LAMB2)                                                       | 5.01E-06 | Yes | No  | Yes | No  | No  | Yes | Yes |
| 5914   | RARA    | retinoic acid receptor, alpha                                                           | 5.01E-06 | Yes | No  | No  | Yes | No  | No  | No  |
| 9695   | EDEM1   | ER degradation enhancer, mannosidase alpha-like 1                                       | 5.02E-06 | No  | No  | Yes | No  | No  | No  | No  |
| 89953  | KLC4    | kinesin light chain 4                                                                   | 5.03E-06 | No  | No  | No  | No  | Yes | No  | No  |
| 143279 | HECTD2  | HECT domain containing 2                                                                | 5.03E-06 | No  |
| 56159  | TEX11   | testis expressed 11                                                                     | 5.04E-06 | Yes | No  | Yes | No  | No  | No  | No  |
| 2079   | ERH     | enhancer of rudimentary homolog (Drosophila)                                            | 5.07E-06 | No  | No  | Yes | No  | No  | No  | No  |
| 11101  | ATE1    | arginyltransferase 1                                                                    | 5.07E-06 | No  | No  | No  | Yes | No  | No  | No  |
| 10849  | CD3EAP  | CD3e molecule, epsilon associated protein                                               | 5.08E-06 | No  | No  | No  | Yes | No  | Yes | No  |
| 5473   | PPBP    | pro-platelet basic protein (chemokine (C-X-C motif) ligand 7)                           | 5.09E-06 | No  | No  | Yes | No  | No  | No  | No  |
| 50814  | NSDHL   | NAD(P) dependent steroid dehydrogenase-like                                             | 5.09E-06 | No  | No  | Yes | No  | No  | No  | No  |
| 2      | A2M     | alpha-2-macroglobulin                                                                   | 5.09E-06 | Yes | No  | Yes | No  | No  | No  | No  |

|        |          |                                                                                  |          |     |    |     |     |    |     |    |
|--------|----------|----------------------------------------------------------------------------------|----------|-----|----|-----|-----|----|-----|----|
| 9313   | MMP20    | matrix metalloproteinase 20                                                      | 5.09E-06 | No  | No | No  | Yes | No | No  | No |
| 2803   | GOLGA4   | golgi autoantigen, golgin subfamily a, 4                                         | 5.10E-06 | No  | No | No  | No  | No | No  | No |
| 9879   | DDX46    | DEAD (Asp-Glu-Ala-Asp) box polypeptide 46                                        | 5.10E-06 | No  | No | Yes | No  | No | No  | No |
| 55188  | RIC8B    | resistance to inhibitors of cholinesterase 8 homolog B (C. elegans)              | 5.10E-06 | No  | No | Yes | No  | No | No  | No |
| 4197   | MDS1     | myelodysplasia syndrome 1                                                        | 5.10E-06 | Yes | No | Yes | No  | No | No  | No |
| 4163   | MCC      | mutated in colorectal cancers                                                    | 5.11E-06 | No  | No | Yes | No  | No | No  | No |
| 5464   | PPA1     | pyrophosphatase (inorganic) 1                                                    | 5.11E-06 | No  | No | No  | Yes | No | No  | No |
| 83692  | CD98L2   | CD98 molecule-like 2                                                             | 5.13E-06 | Yes | No | No  | Yes | No | Yes | No |
| 2042   | EPHA3    | EPH receptor A3                                                                  | 5.16E-06 | Yes | No | No  | Yes | No | No  | No |
| 1267   | CNP      | 2',3'-cyclic nucleotide 3' phosphodiesterase                                     | 5.16E-06 | Yes | No | No  | Yes | No | No  | No |
| 79368  | FCRL2    | Fc receptor-like 2                                                               | 5.16E-06 | No  | No | No  | Yes | No | No  | No |
| 9925   | ZBTB5    | zinc finger and BTB domain containing 5                                          | 5.19E-06 | No  | No | Yes | No  | No | No  | No |
| 11196  | SEC23IP  | SEC23 interacting protein                                                        | 5.20E-06 | No  | No | Yes | No  | No | No  | No |
| 6455   | SH3GL1   | SH3-domain GRB2-like 1                                                           | 5.21E-06 | Yes | No | No  | No  | No | No  | No |
| 634    | CEACAM1  | carcinoembryonic antigen-related cell adhesion molecule 1 (biliary glycoprotein) | 5.21E-06 | No  | No | No  | Yes | No | No  | No |
| 122769 | PP1L5    | peptidylprolyl isomerase (cyclophilin)-like 5                                    | 5.21E-06 | No  | No | Yes | No  | No | Yes | No |
| 83930  | STARD3NL | STARD3 N-terminal like                                                           | 5.21E-06 | No  | No | Yes | No  | No | No  | No |
| 114789 | SLC25A25 | solute carrier family 25 (mitochondrial carrier; phosphate carrier), member 25   | 5.22E-06 | No  | No | Yes | No  | No | No  | No |
| 51123  | ZNF706   | zinc finger protein 706                                                          | 5.23E-06 | Yes | No | Yes | No  | No | No  | No |
| 23321  | TRIM2    | tripartite motif-containing 2                                                    | 5.24E-06 | No  | No | Yes | No  | No | No  | No |
| 135293 | PM20D2   | peptidase M20 domain containing 2                                                | 5.24E-06 | No  | No | Yes | No  | No | No  | No |
| 1459   | CSNK2A2  | casein kinase 2, alpha prime polypeptide                                         | 5.26E-06 | No  | No | Yes | No  | No | No  | No |
| 2009   | EML1     | echinoderm microtubule associated protein like 1                                 | 5.26E-06 | No  | No | No  | Yes | No | No  | No |
| 145282 | MIPOL1   | mirror-image polydactyl 1                                                        | 5.29E-06 | No  | No | No  | Yes | No | No  | No |
| 6712   | SPTBN2   | spectrin, beta, non-erythrocytic 2                                               | 5.32E-06 | No  | No | No  | Yes | No | No  | No |
| 25895  | FAM119B  | family with sequence similarity 119, member B                                    | 5.32E-06 | No  | No | Yes | No  | No | No  | No |
| 55004  | C11orf59 | chromosome 11 open reading frame 59                                              | 5.35E-06 | No  | No | Yes | No  | No | No  | No |
| 8747   | ADAM21   | ADAM metalloproteinase domain 21                                                 | 5.36E-06 | No  | No | No  | Yes | No | No  | No |
| 6717   | SRI      | sorcin                                                                           | 5.37E-06 | No  | No | Yes | No  | No | No  | No |
| 5725   | PTBP1    | polypyrimidine tract binding protein 1                                           | 5.37E-06 | Yes | No | No  | No  | No | No  | No |
| 56993  | TOMM22   | translocase of outer mitochondrial membrane 22 homolog (yeast)                   | 5.38E-06 | No  | No | Yes | No  | No | No  | No |
| 2166   | FAAH     | fatty acid amide hydrolase                                                       | 5.39E-06 | No  | No | Yes | No  | No | No  | No |
| 8270   | LAGE3    | L antigen family, member 3                                                       | 5.40E-06 | No  | No | Yes | No  | No | No  | No |
| 1781   | DYNC112  | dynein, cytoplasmic 1, intermediate chain 2                                      | 5.44E-06 | Yes | No | No  | Yes | No | No  | No |

|        |          |                                                                                                   |          |     |     |     |     |     |     |     |     |
|--------|----------|---------------------------------------------------------------------------------------------------|----------|-----|-----|-----|-----|-----|-----|-----|-----|
| 79037  | PVRIG    | poliovirus receptor related immunoglobulin domain containing                                      | 5.44E-06 | No  |
| 8228   | PNPLA4   | patatin-like phospholipase domain containing 4                                                    | 5.45E-06 | No  | No  | No  | Yes | No  | No  | No  | No  |
| 6014   | RIT2     | Ras-like without CAAX 2                                                                           | 5.45E-06 | No  |
| 10921  | RNPS1    | RNA binding protein S1, serine-rich domain                                                        | 5.45E-06 | No  | No  | No  | No  | Yes | No  | No  | No  |
| 2113   | ETS1     | v-ets erythroblastosis virus E26 oncogene homolog 1 (avian)                                       | 5.45E-06 | No  | No  | Yes | No  | No  | Yes | No  | No  |
| 126133 | ALDH16A1 | aldehyde dehydrogenase 16 family, member A1                                                       | 5.46E-06 | Yes | No  | No  | Yes | No  | No  | No  | No  |
| 55011  | PIH1D1   | PIH1 domain containing 1                                                                          | 5.46E-06 | No  | No  | No  | Yes | No  | No  | No  | No  |
| 4292   | MLH1     | mutL homolog 1, colon cancer, nonpolyposis type 2 (E. coli)                                       | 5.49E-06 | No  | No  | Yes | No  | No  | Yes | No  | No  |
| 51278  | IER5     | immediate early response 5                                                                        | 5.52E-06 | Yes | Yes | Yes | No  | No  | Yes | No  | No  |
| 6388   | SDF2     | stromal cell-derived factor 2                                                                     | 5.53E-06 | No  | No  | No  | No  | Yes | Yes | Yes | Yes |
| 375347 | DNAH12L  | dynein, axonemal, heavy chain 12-like                                                             | 5.54E-06 | NA  | No  | No  | Yes | No  | No  | No  | No  |
| 161    | AP2A2    | adaptor-related protein complex 2, alpha 2 subunit                                                | 5.54E-06 | No  | No  | No  | Yes | No  | No  | No  | No  |
| 54922  | RASIP1   | Ras interacting protein 1                                                                         | 5.55E-06 | Yes | No  |
| 23429  | RYBP     | RING1 and YY1 binding protein                                                                     | 5.60E-06 | No  | No  | Yes | No  | No  | No  | No  | No  |
| 54839  | LRRC49   | leucine rich repeat containing 49                                                                 | 5.62E-06 | No  | No  | Yes | No  | No  | No  | No  | No  |
| 80312  | TET1     | tet oncogene 1                                                                                    | 5.64E-06 | NA  | No  | Yes | No  | No  | No  | No  | No  |
| 5250   | SLC25A3  | solute carrier family 25 (mitochondrial carrier, phosphate carrier), member 3                     | 5.65E-06 | No  | No  | Yes | No  | No  | No  | No  | No  |
| 26121  | PRPF31   | PRPF31 pre-mRNA processing factor 31 homolog (S. cerevisiae)                                      | 5.68E-06 | Yes | No  | Yes | No  | No  | No  | No  | No  |
| 10225  | CD96     | CD96 molecule                                                                                     | 5.74E-06 | Yes | No  | Yes | No  | No  | No  | No  | No  |
| 91369  | ANKRD40  | ankyrin repeat domain 40                                                                          | 5.74E-06 | No  | No  | Yes | No  | No  | No  | No  | No  |
| 5532   | PPP3CB   | protein phosphatase 3 (formerly 2B), catalytic subunit, beta isoform                              | 5.75E-06 | No  | Yes | No  | Yes | No  | No  | No  | No  |
| 4343   | MOV10    | Mov10, Moloney leukemia virus 10, homolog (mouse)                                                 | 5.76E-06 | Yes | No  | No  | Yes | No  | No  | No  | No  |
| 63917  | GALNT11  | UDP-N-acetyl-alpha-D-galactosamine:polypeptide N-acetylglucosaminyltransferase 11 (GalNAc-T11)    | 5.76E-06 | Yes | No  |
| 4282   | MIF      | macrophage migration inhibitory factor (glycosylation-inhibiting factor)                          | 5.76E-06 | No  | No  | No  | No  | Yes | No  | No  | No  |
| 5458   | POU4F2   | POU class 4 homeobox 2                                                                            | 5.79E-06 | No  | No  | Yes | No  | No  | No  | No  | No  |
| 6598   | SMARCB1  | SWI/SNF related, matrix associated, actin dependent regulator of chromatin, subfamily b, member 1 | 5.79E-06 | No  | No  | Yes | No  | No  | No  | No  | No  |
| 1000   | CDH2     | cadherin 2, type 1, N-cadherin (neuronal)                                                         | 5.87E-06 | No  | No  | Yes | No  | No  | No  | No  | No  |
| 57326  | PBXIP1   | pre-B-cell leukemia homeobox interacting protein 1                                                | 5.87E-06 | Yes | No  | No  | Yes | No  | No  | No  | No  |
| 53834  | FGFRL1   | fibroblast growth factor receptor-like 1                                                          | 5.88E-06 | No  | No  | No  | No  | Yes | No  | No  | No  |
| 4938   | OAS1     | 2',5'-oligoadenylate synthetase 1, 40/46kDa                                                       | 5.88E-06 | Yes | No  | Yes | No  | No  | Yes | No  | No  |
| 26136  | TES      | testis derived transcript (3 LIM domains)                                                         | 5.89E-06 | Yes | No  | Yes | No  | No  | No  | No  | No  |
| 1889   | ECE1     | endothelin converting enzyme 1                                                                    | 5.89E-06 | Yes | No  | No  | Yes | No  | Yes | Yes | Yes |
| 7760   | ZNF213   | zinc finger protein 213                                                                           | 5.90E-06 | No  | No  | Yes | No  | No  | No  | No  | No  |
| 3423   | IDS      | iduronate 2-sulfatase (Hunter syndrome)                                                           | 5.90E-06 | Yes | No  | No  | Yes | No  | No  | No  | No  |



|        |          |                                                                                                                 |          |     |     |     |     |     |     |    |
|--------|----------|-----------------------------------------------------------------------------------------------------------------|----------|-----|-----|-----|-----|-----|-----|----|
| 9728   | KIAA0256 | KIAA0256 gene product                                                                                           | 5.91E-06 | Yes | No  | No  | Yes | No  | No  | No |
| 2804   | GOLGB1   | golgin B1, golgi integral membrane protein                                                                      | 5.93E-06 | No  | No  | No  | No  | Yes | No  | No |
| 120227 | CYP2R1   | cytochrome P450, family 2, subfamily R, polypeptide 1                                                           | 5.93E-06 | No  | No  | No  | Yes | No  | No  | No |
| 23204  | ARL6IP1  | ADP-ribosylation factor-like 6 interacting protein 1                                                            | 5.98E-06 | No  | No  | Yes | No  | No  | No  | No |
| 55700  | MAP7D1   | MAP7 domain containing 1                                                                                        | 6.00E-06 | No  | No  | Yes | No  | No  | No  | No |
| 27095  | TRAPPC3  | trafficking protein particle complex 3                                                                          | 6.00E-06 | No  | No  | Yes | No  | No  | No  | No |
| 64218  | SEMA4A   | sema domain, immunoglobulin domain (Ig), transmembrane domain (TM) and short cytoplasmic domain (semaphorin) 4A | 6.00E-06 | No  | No  | No  | Yes | No  | No  | No |
| 5209   | PFKFB3   | 6-phosphofructo-2-kinase/fructose-2,6-bisphosphatase 3                                                          | 6.01E-06 | No  | No  | No  | Yes | No  | No  | No |
| 201176 | ARHGAP27 | Rho GTPase activating protein 27                                                                                | 6.01E-06 | Yes | No  | No  | Yes | No  | No  | No |
| 55851  | PSENN    | presenilin enhancer 2 homolog (C. elegans)                                                                      | 6.02E-06 | No  | No  | Yes | No  | No  | No  | No |
| 220992 | ZNF485   | zinc finger protein 485                                                                                         | 6.03E-06 | Yes | No  | Yes | No  | No  | No  | No |
| 7048   | TGFB2    | transforming growth factor, beta receptor II (70/80kDa)                                                         | 6.04E-06 | Yes | Yes | Yes | No  | No  | No  | No |
| 56670  | SUCNR1   | succinate receptor 1                                                                                            | 6.04E-06 | Yes | No  | Yes | No  | No  | No  | No |
| 25843  | MOBK1    | MOBK1, Mps One Binder kinase activator-like 3 (yeast)                                                           | 6.05E-06 | No  | No  | Yes | No  | No  | Yes | No |
| 26061  | HACL1    | 2-hydroxyacyl-CoA lyase 1                                                                                       | 6.05E-06 | No  | No  | No  | Yes | No  | Yes | No |
| 64167  | ERAP2    | endoplasmic reticulum aminopeptidase 2                                                                          | 6.07E-06 | No  | No  | Yes | No  | No  | No  | No |
| 7005   | TEAD3    | TEA domain family member 3                                                                                      | 6.08E-06 | No  | No  | No  | Yes | No  | No  | No |
| 54386  | TERF2IP  | telomeric repeat binding factor 2, interacting protein                                                          | 6.08E-06 | No  | No  | No  | No  | Yes | No  | No |
| 1427   | CRYGS    | crystallin, gamma S                                                                                             | 6.10E-06 | No  | No  | Yes | No  | No  | No  | No |
| 7750   | ZMY2     | zinc finger, MYM-type 2                                                                                         | 6.10E-06 | No  | No  | No  | No  | Yes | No  | No |
| 23327  | NEDD4L   | neural precursor cell expressed, developmentally down-regulated 4-like                                          | 6.13E-06 | No  | No  | Yes | No  | No  | No  | No |
| 6495   | SIX1     | SIX homeobox 1                                                                                                  | 6.13E-06 | Yes | No  | Yes | No  | No  | No  | No |
| 285313 | IGSF10   | immunoglobulin superfamily, member 10                                                                           | 6.16E-06 | No  | No  | Yes | No  | No  | No  | No |
| 567    | B2M      | beta-2-microglobulin                                                                                            | 6.17E-06 | Yes | No  | Yes | No  | No  | Yes | No |
| 2780   | GNAT2    | guanine nucleotide binding protein (G protein), alpha transducing activity polypeptide 2                        | 6.17E-06 | No  | No  | No  | No  | Yes | No  | No |
| 9532   | BAG2     | BCL2-associated athanogene 2                                                                                    | 6.19E-06 | No  | No  | No  | No  | Yes | No  | No |
| 79590  | MRPL24   | mitochondrial ribosomal protein L24                                                                             | 6.20E-06 | No  | No  | No  | Yes | No  | No  | No |
| 11122  | PTPRT    | protein tyrosine phosphatase, receptor type, T                                                                  | 6.23E-06 | No  | No  | No  | Yes | No  | No  | No |
| 85025  | TMEM60   | transmembrane protein 60                                                                                        | 6.25E-06 | No  | No  | Yes | No  | No  | Yes | No |
| 440695 | ETV3L    | ets variant gene 3-like                                                                                         | 6.25E-06 | NA  | No  | No  | No  | Yes | No  | No |
| 2045   | EPHA7    | EPH receptor A7                                                                                                 | 6.26E-06 | No  | No  | Yes | No  | No  | No  | No |
| 1602   | DACH1    | dachshund homolog 1 (Drosophila)                                                                                | 6.27E-06 | No  | No  | Yes | No  | No  | No  | No |
| 5717   | PSMD11   | proteasome (prosome, macropain) 26S subunit, non-ATPase, 11                                                     | 6.28E-06 | No  | No  | No  | No  | No  | No  | No |
| 10962  | MLLT11   | myeloid/lymphoid or mixed-lineage leukemia (trithorax homolog, Drosophila); translocated to, 11                 | 6.30E-06 | Yes | No  | Yes | No  | No  | Yes | No |

|        |           |                                                                |          |     |     |     |     |     |     |    |
|--------|-----------|----------------------------------------------------------------|----------|-----|-----|-----|-----|-----|-----|----|
| 114327 | EFHC1     | EF-hand domain (C-terminal) containing 1                       | 6.31E-06 | No  | No  | No  | Yes | No  | No  | No |
| 10026  | PICK      | phosphatidylinositol glycan anchor biosynthesis, class K       | 6.34E-06 | No  | No  | Yes | No  | No  | No  | No |
| 81621  | KAZALD1   | Kazal-type serine peptidase inhibitor domain 1                 | 6.42E-06 | No  | No  | No  | Yes | No  | Yes | No |
| 10672  | GNA13     | guanine nucleotide binding protein (G protein), alpha 13       | 6.42E-06 | No  | No  | No  | No  | Yes | No  | No |
| 58516  | FAM60A    | family with sequence similarity 60, member A                   | 6.43E-06 | No  | No  | No  | Yes | No  | Yes | No |
| 55039  | TRMT12    | tRNA methyltransferase 12 homolog (S. cerevisiae)              | 6.44E-06 | No  | No  | Yes | No  | No  | No  | No |
| 2187   | FANCB     | Fanconi anemia, complementation group B                        | 6.44E-06 | No  | No  | No  | No  | No  | No  | No |
| 53347  | UBASH3A   | ubiquitin associated and SH3 domain containing, A              | 6.44E-06 | No  | No  | No  | Yes | No  | No  | No |
| 64699  | TMPRSS3   | transmembrane protease, serine 3                               | 6.44E-06 | No  | No  | No  | Yes | No  | No  | No |
| 23637  | RABGAP1   | RAB GTPase activating protein 1                                | 6.48E-06 | No  | Yes | Yes | No  | No  | No  | No |
| 57684  | ZBTB26    | zinc finger and BTB domain containing 26                       | 6.48E-06 | No  | No  | Yes | No  | No  | No  | No |
| 1776   | DNASE1L3  | deoxyribonuclease I-like 3                                     | 6.48E-06 | Yes | No  | Yes | No  | No  | No  | No |
| 6934   | TCF7L2    | transcription factor 7-like 2 (T-cell specific, HMG-box)       | 6.48E-06 | Yes | No  | Yes | No  | No  | No  | No |
| 2181   | ACSL3     | acyl-CoA synthetase long-chain family member 3                 | 6.49E-06 | Yes | Yes | Yes | No  | No  | No  | No |
| 9787   | DLGAP5    | discs, large (Drosophila) homolog-associated protein 5         | 6.52E-06 | No  | No  | No  | Yes | No  | No  | No |
| 387836 | CLEC2A    | C-type lectin domain family 2, member A                        | 6.53E-06 | NA  | No  | Yes | No  | No  | No  | No |
| 8831   | SYNGAP1   | synaptic Ras GTPase activating protein 1 homolog (rat)         | 6.54E-06 | Yes | No  | Yes | No  | No  | No  | No |
| 22834  | ZNF652    | zinc finger protein 652                                        | 6.54E-06 | Yes | No  | Yes | No  | No  | No  | No |
| 2554   | GABRA1    | gamma-aminobutyric acid (GABA) A receptor, alpha 1             | 6.56E-06 | No  | No  | Yes | No  | No  | No  | No |
| 3996   | LLGL1     | lethal giant larvae homolog 1 (Drosophila)                     | 6.56E-06 | No  | No  | No  | No  | No  | No  | No |
| 29766  | TMOD3     | tropomodulin 3 (ubiquitous)                                    | 6.59E-06 | Yes | No  | No  | Yes | No  | No  | No |
| 8362   | HIST1H4K  | histone cluster 1, H4k                                         | 6.61E-06 | No  | Yes | Yes | No  | No  | Yes | No |
| 4689   | NCF4      | neutrophil cytosolic factor 4, 40kDa                           | 6.62E-06 | No  | No  | Yes | No  | No  | Yes | No |
| 400926 | FLJ90680  | FLJ90680 protein                                               | 6.62E-06 | NA  | No  | Yes | No  | No  | No  | No |
| 400556 | FLJ45121  | FLJ45121 protein                                               | 6.63E-06 | NA  | No  | No  | Yes | No  | No  | No |
| 5552   | SRGN      | serglycin                                                      | 6.63E-06 | No  | No  | Yes | No  | No  | No  | No |
| 400965 | LOC400965 | hypothetical gene supported by AK098018                        | 6.63E-06 | NA  | No  | No  | Yes | No  | No  | No |
| 3096   | HIVEP1    | human immunodeficiency virus type 1 enhancer binding protein 1 | 6.69E-06 | No  | No  | Yes | No  | No  | Yes | No |
| 51291  | GMIP      | GEM interacting protein                                        | 6.73E-06 | Yes | No  | No  | Yes | No  | No  | No |
| 55723  | ASF1B     | ASF1 anti-silencing function 1 homolog B (S. cerevisiae)       | 6.77E-06 | No  | No  | No  | Yes | No  | No  | No |
| 79961  | DENND2D   | DENN/MADD domain containing 2D                                 | 6.78E-06 | No  | No  | No  | Yes | No  | No  | No |
| 11216  | AKAP10    | A kinase (PRKA) anchor protein 10                              | 6.79E-06 | Yes | No  | Yes | No  | No  | No  | No |
| 56654  | NPDC1     | neural proliferation, differentiation and control, 1           | 6.81E-06 | No  | No  | No  | No  | No  | No  | No |
| 140465 | MYL6B     | myosin, light chain 6B, alkali, smooth muscle and non-muscle   | 6.84E-06 | No  | No  | No  | Yes | No  | Yes | No |

|        |              |                                                                  |          |     |     |     |     |     |     |     |
|--------|--------------|------------------------------------------------------------------|----------|-----|-----|-----|-----|-----|-----|-----|
| 9528   | TMEM59       | transmembrane protein 59                                         | 6.85E-06 | No  | No  | Yes | No  | No  | No  | No  |
| 2475   | FRAP1        | FK506 binding protein 12-rapamycin associated protein 1          | 6.86E-06 | No  | No  | No  | Yes | No  | No  | No  |
| 10863  | ADAM28       | ADAM metallopeptidase domain 28                                  | 6.89E-06 | Yes | No  | Yes | No  | No  | No  | No  |
| 8477   | GPR65        | G protein-coupled receptor 65                                    | 6.92E-06 | Yes | No  | Yes | No  | No  | No  | No  |
| 29116  | MYLIP        | myosin regulatory light chain interacting protein                | 6.93E-06 | Yes | No  | Yes | No  | No  | No  | No  |
| 1284   | COL4A2       | collagen, type IV, alpha 2                                       | 6.94E-06 | No  | No  | No  | Yes | No  | No  | No  |
| 401265 | KLHL31       | kelch-like 31 (Drosophila)                                       | 6.95E-06 | No  | No  | Yes | No  | No  | No  | No  |
| 6862   | T            | T, brachyury homolog (mouse)                                     | 6.95E-06 | No  | No  | No  | No  | Yes | No  | No  |
| 126626 | RP11-681B1.1 | hypothetical protein MGC29891                                    | 6.95E-06 | NA  | No  | Yes | No  | No  | Yes | No  |
| 55294  | FBXW7        | F-box and WD repeat domain containing 7                          | 7.01E-06 | No  | No  | Yes | No  | No  | No  | No  |
| 26519  | TIMM10       | translocase of inner mitochondrial membrane 10 homolog (yeast)   | 7.01E-06 | No  | No  | Yes | No  | No  | No  | No  |
| 8992   | ATP6V0E1     | ATPase, H+ transporting, lysosomal 9kDa, V0 subunit e1           | 7.02E-06 | Yes | Yes | Yes | No  | No  | No  | No  |
| 51193  | ZNF639       | zinc finger protein 639                                          | 7.02E-06 | No  |
| 25962  | KIAA1429     | KIAA1429                                                         | 7.03E-06 | No  | No  | Yes | No  | No  | No  | No  |
| 8905   | AP1S2        | adaptor-related protein complex 1, sigma 2 subunit               | 7.03E-06 | Yes | Yes | Yes | No  | No  | Yes | Yes |
| 2241   | FER          | fer (fps/fes related) tyrosine kinase                            | 7.04E-06 | No  | No  | No  | No  | Yes | No  | No  |
| 9616   | RNF7         | ring finger protein 7                                            | 7.04E-06 | No  | No  | Yes | No  | No  | No  | No  |
| 2620   | GAS2         | growth arrest-specific 2                                         | 7.07E-06 | Yes | No  | No  | Yes | No  | No  | No  |
| 64398  | MPP5         | membrane protein, palmitoylated 5 (MAGUK p65 subfamily member 5) | 7.09E-06 | No  | No  | No  | Yes | No  | No  | No  |
| 8914   | TIMELESS     | timeless homolog (Drosophila)                                    | 7.09E-06 | No  | No  | No  | Yes | No  | No  | No  |
| 529    | ATP6V1E1     | ATPase, H+ transporting, lysosomal 31kDa, V1 subunit E1          | 7.12E-06 | No  | No  | Yes | No  | No  | No  | No  |
| 3198   | HOXA1        | homeobox A1                                                      | 7.12E-06 | No  | No  | Yes | No  | No  | No  | No  |
| 84991  | RBM17        | RNA binding motif protein 17                                     | 7.16E-06 | No  | No  | Yes | No  | No  | No  | No  |
| 6237   | RRAS         | related RAS viral (r-ras) oncogene homolog                       | 7.17E-06 | Yes | No  | Yes | No  | No  | No  | No  |
| 58506  | SCAF1        | SR-related CTD-associated factor 1                               | 7.17E-06 | No  | No  | Yes | No  | No  | No  | No  |
| 1641   | DCX          | doublecortin; lissencephaly, X-linked (doublecortin)             | 7.19E-06 | No  | No  | Yes | No  | No  | No  | No  |
| 35948  | IRF2BP2      | interferon regulatory factor 2 binding protein 2                 | 7.20E-06 | Yes | Yes | Yes | No  | No  | Yes | No  |
| 11284  | PNKP         | polynucleotide kinase 3'-phosphatase                             | 7.21E-06 | No  | No  | No  | Yes | No  | No  | No  |
| 55584  | CHRNA9       | cholinergic receptor, nicotinic, alpha 9                         | 7.21E-06 | No  | No  | No  | Yes | No  | No  | No  |
| 9746   | CLSTN3       | calyntenin 3                                                     | 7.21E-06 | No  | No  | No  | Yes | No  | No  | No  |
| 7975   | MAFK         | v-maf musculoaponeurotic fibrosarcoma oncogene homolog K (avian) | 7.24E-06 | Yes | No  | No  | Yes | No  | No  | No  |
| 3594   | IL12RB1      | interleukin 12 receptor, beta 1                                  | 7.25E-06 | Yes | No  | No  | Yes | No  | No  | No  |
| 638    | BIK          | BCL2-interacting killer (apoptosis-inducing)                     | 7.26E-06 | No  | No  | Yes | No  | No  | No  | No  |
| 1820   | ARID3A       | AT rich interactive domain 3A (BRIGHT-like)                      | 7.27E-06 | Yes | No  | No  | Yes | No  | No  | No  |

|        |          |                                                                                               |          |     |     |     |     |     |     |    |
|--------|----------|-----------------------------------------------------------------------------------------------|----------|-----|-----|-----|-----|-----|-----|----|
| 23362  | PSD3     | pleckstrin and Sec7 domain containing 3                                                       | 7.27E-06 | Yes | No  | No  | Yes | No  | No  | No |
| 9149   | DYRK1B   | dual-specificity tyrosine-(Y)-phosphorylation regulated kinase 1B                             | 7.27E-06 | No  | No  | Yes | No  | No  | No  | No |
| 9328   | GTF3C5   | general transcription factor IIIc, polypeptide 5, 63kDa                                       | 7.29E-06 | No  | No  | Yes | No  | No  | No  | No |
| 2898   | GRIK2    | glutamate receptor, ionotropic, kainate 2                                                     | 7.40E-06 | Yes | No  | Yes | No  | No  | No  | No |
| 5501   | PPP1CC   | protein phosphatase 1, catalytic subunit, gamma isoform                                       | 7.40E-06 | No  | No  | No  | Yes | No  | No  | No |
| 10059  | DNM1L    | dynamitin 1-like                                                                              | 7.40E-06 | No  | No  | No  | No  | Yes | No  | No |
| 677819 | SNORA37  | small nucleolar RNA, H/ACA box 37                                                             | 7.40E-06 | NA  | No  | No  | Yes | No  | No  | No |
| 51533  | PHF7     | PHD finger protein 7                                                                          | 7.40E-06 | No  | No  | Yes | No  | No  | No  | No |
| 7337   | UBE3A    | ubiquitin protein ligase E3A (human papilloma virus E6-associated protein, Angelman syndrome) | 7.41E-06 | Yes | No  | Yes | No  | No  | No  | No |
| 2534   | FYN      | FYN oncogene related to SRC, FGR, YES                                                         | 7.41E-06 | No  | No  | Yes | No  | No  | Yes | No |
| 7178   | TPT1     | tumor protein, translationally-controlled 1                                                   | 7.43E-06 | No  | No  | Yes | No  | No  | No  | No |
| 9656   | MDC1     | mediator of DNA damage checkpoint 1                                                           | 7.43E-06 | No  | No  | Yes | No  | No  | No  | No |
| 56925  | LXN      | latexin                                                                                       | 7.44E-06 | Yes | No  | No  | Yes | No  | No  | No |
| 6176   | RPLP1    | ribosomal protein, large, P1                                                                  | 7.46E-06 | Yes | No  | Yes | No  | No  | No  | No |
| 55151  | TMEM38B  | transmembrane protein 38B                                                                     | 7.46E-06 | Yes | Yes | No  | No  | No  | Yes | No |
| 400765 | FLJ35409 | FLJ35409 protein                                                                              | 7.46E-06 | NA  | No  | Yes | No  | No  | No  | No |
| 896    | CCND3    | cyclin D3                                                                                     | 7.48E-06 | No  | Yes | Yes | No  | No  | No  | No |
| 27239  | GPR162   | G protein-coupled receptor 162                                                                | 7.48E-06 | No  | No  | No  | Yes | No  | No  | No |
| 83990  | BRIP1    | BRCA1 interacting protein C-terminal helicase 1                                               | 7.50E-06 | No  | No  | Yes | No  | No  | No  | No |
| 9633   | MTL5     | metallothionein-like 5, testis-specific (tesmin)                                              | 7.52E-06 | No  | No  | No  | Yes | No  | No  | No |
| 10477  | UBE2E3   | ubiquitin-conjugating enzyme E2E 3 (UBC4/5 homolog, yeast)                                    | 7.57E-06 | No  | No  | No  | Yes | No  | No  | No |
| 8717   | TRADD    | TNFRSF1A-associated via death domain                                                          | 7.58E-06 | Yes | No  | Yes | No  | No  | No  | No |
| 3720   | JARID2   | jumonji, AT rich interactive domain 2                                                         | 7.59E-06 | Yes | No  | Yes | No  | No  | No  | No |
| 7351   | UCP2     | uncoupling protein 2 (mitochondrial, proton carrier)                                          | 7.63E-06 | No  | Yes | No  | Yes | No  | No  | No |
| 1404   | HAPLN1   | hyaluronan and proteoglycan link protein 1                                                    | 7.64E-06 | No  | No  | Yes | No  | No  | No  | No |
| 4356   | MPP3     | membrane protein, palmitoylated 3 (MAGUK p55 subfamily member 3)                              | 7.68E-06 | No  | No  | Yes | No  | No  | No  | No |
| 51071  | DERA     | 2-deoxyribose-5-phosphate aldolase homolog (C. elegans)                                       | 7.68E-06 | No  | No  | Yes | No  | No  | No  | No |
| 84938  | ATG4C    | ATG4 autophagy related 4 homolog C (S. cerevisiae)                                            | 7.68E-06 | NA  | No  | No  | Yes | No  | Yes | No |
| 6507   | SLC1A3   | solute carrier family 1 (glial high affinity glutamate transporter), member 3                 | 7.69E-06 | Yes | No  | Yes | No  | No  | No  | No |
| 51141  | INSIG2   | insulin induced gene 2                                                                        | 7.69E-06 | No  | No  | Yes | No  | No  | No  | No |
| 191    | AHCY     | S-adenosylhomocysteine hydrolase                                                              | 7.71E-06 | No  | No  | Yes | No  | No  | No  | No |
| 26003  | GORASP2  | golgi reassembly stacking protein 2, 55kDa                                                    | 7.74E-06 | No  | No  | Yes | No  | No  | No  | No |
| 2693   | GHSR     | growth hormone secretagogue receptor                                                          | 7.75E-06 | No  | No  | Yes | No  | No  | No  | No |
| 3958   | LGALS3   | lectin, galactoside-binding, soluble, 3                                                       | 7.75E-06 | Yes | No  | No  | Yes | No  | No  | No |

|        |              |                                                                                             |          |     |     |     |     |     |     |     |
|--------|--------------|---------------------------------------------------------------------------------------------|----------|-----|-----|-----|-----|-----|-----|-----|
| 3231   | HOXD1        | homeobox D1                                                                                 | 7.76E-06 | No  | No  | No  | Yes | No  | No  | No  |
| 129831 | RBM45        | RNA binding motif protein 45                                                                | 7.78E-06 | No  | No  | No  | Yes | No  | No  | No  |
| 326343 | MT1DP        | metallothionein 1D (pseudogene)                                                             | 7.79E-06 | NA  | No  | No  | No  | Yes | No  | No  |
| 144577 | C12orf66     | chromosome 12 open reading frame 66                                                         | 7.80E-06 | Yes | No  | Yes | No  | No  | No  | No  |
| 55347  | ABHD10       | abhydrolase domain containing 10                                                            | 7.85E-06 | Yes | Yes | No  | No  | Yes | No  | No  |
| 117247 | SLC16A10     | solute carrier family 16, member 10 (aromatic amino acid transporter)                       | 7.87E-06 | Yes | No  | Yes | No  | No  | No  | No  |
| 8351   | HIST1H3D     | histone cluster 1, H3d                                                                      | 7.94E-06 | No  | No  | Yes | No  | No  | No  | No  |
| 4982   | TNFRSF11B    | tumor necrosis factor receptor superfamily, member 11b (osteoprotegerin)                    | 7.95E-06 | No  | No  | Yes | No  | No  | No  | No  |
| 200030 | NBPF11       | neuroblastoma breakpoint family, member 11                                                  | 8.00E-06 | Yes | Yes | Yes | No  | No  | No  | No  |
| 8527   | DGKD         | diacylglycerol kinase, delta 130kDa                                                         | 8.03E-06 | No  | No  | Yes | No  | No  | Yes | Yes |
| 170622 | COMMD6       | COMM domain containing 6                                                                    | 8.04E-06 | No  | No  | Yes | No  | No  | No  | No  |
| 285782 | CAGE1        | cancer antigen 1                                                                            | 8.06E-06 | No  | No  | Yes | No  | No  | No  | No  |
| 51626  | DYNC2L1      | dynein, cytoplasmic 2, light intermediate chain 1                                           | 8.07E-06 | No  | No  | Yes | No  | No  | No  | No  |
| 256472 | TMEM151A     | transmembrane protein 151A                                                                  | 8.08E-06 | Yes | No  | Yes | No  | No  | No  | No  |
| 10897  | YIF1A        | Yip1 interacting factor homolog A (S. cerevisiae)                                           | 8.08E-06 | No  | No  | Yes | No  | No  | No  | No  |
| 2730   | GCLM         | glutamate-cysteine ligase, modifier subunit                                                 | 8.08E-06 | No  | No  | No  | Yes | No  | Yes | No  |
| 144983 | RP11-78J21.1 | heterogeneous nuclear ribonucleoprotein A1-like                                             | 8.08E-06 | No  | No  | Yes | No  | No  | No  | No  |
| 353135 | LCE1E        | late cornified envelope 1E                                                                  | 8.09E-06 | No  | No  | Yes | No  | No  | No  | No  |
| 149041 | RC3H1        | ring finger and CCH-type zinc finger domains 1                                              | 8.11E-06 | No  | No  | No  | Yes | No  | No  | No  |
| 8895   | CPNE3        | copine III                                                                                  | 8.13E-06 | No  | No  | Yes | No  | No  | No  | No  |
| 55119  | PRPF38B      | PRP38 pre-mRNA processing factor 38 (yeast) domain containing B                             | 8.15E-06 | No  | No  | Yes | No  | No  | No  | No  |
| 84283  | TMEM79       | transmembrane protein 79                                                                    | 8.19E-06 | No  | Yes | No  | Yes | No  | Yes | No  |
| 79962  | DNAJC22      | DnaJ (Hsp40) homolog, subfamily C, member 22                                                | 8.19E-06 | Yes | No  | No  | No  | Yes | No  | No  |
| 338761 | C1QL4        | complement component 1, q subcomponent-like 4                                               | 8.19E-06 | NA  | No  | No  | No  | Yes | No  | No  |
| 162963 | ZNF610       | zinc finger protein 610                                                                     | 8.20E-06 | No  | No  | Yes | No  | No  | No  | No  |
| 83607  | AMMECR1L     | AMME chromosomal region gene 1-like                                                         | 8.20E-06 | No  | No  | Yes | No  | No  | No  | No  |
| 51523  | CXXC5        | CXXC finger 5                                                                               | 8.21E-06 | No  | No  | No  | No  | Yes | No  | No  |
| 51065  | RPS27L       | ribosomal protein S27-like                                                                  | 8.21E-06 | No  | No  | Yes | No  | No  | No  | No  |
| 51750  | RTEL1        | regulator of telomere elongation helicase 1                                                 | 8.22E-06 | Yes | No  | No  | No  | No  | No  | No  |
| 50861  | STMN3        | stathmin-like 3                                                                             | 8.22E-06 | Yes | No  | No  | No  | No  | No  | No  |
| 9912   | RICH2        | Rho-type GTPase-activating protein RICH2                                                    | 8.25E-06 | No  | No  | Yes | No  | No  | No  | No  |
| 7046   | TGFBRI       | transforming growth factor, beta receptor I (activin A receptor type II-like kinase, 53kDa) | 8.32E-06 | No  | No  | No  | Yes | No  | No  | No  |
| 196792 | FAM24B       | family with sequence similarity 24, member B                                                | 8.33E-06 | No  | No  | Yes | No  | No  | No  | No  |
| 51251  | NT5C3        | 5'-nucleotidase, cytosolic III                                                              | 8.33E-06 | Yes | No  | Yes | No  | No  | No  | No  |

|        |          |                                                                                 |          |     |     |     |     |     |     |    |
|--------|----------|---------------------------------------------------------------------------------|----------|-----|-----|-----|-----|-----|-----|----|
| 4049   | LTA      | lymphotoxin alpha (TNF superfamily, member 1)                                   | 8.36E-06 | No  | No  | No  | Yes | No  | No  | No |
| 9953   | HS3ST3B1 | heparan sulfate (glucosamine) 3-O-sulfotransferase 3B1                          | 8.38E-06 | Yes | No  | No  | No  | Yes | No  | No |
| 51098  | IFT52    | intraflagellar transport 52 homolog (Chlamydomonas)                             | 8.40E-06 | No  | No  | Yes | No  | No  | No  | No |
| 2911   | GRM1     | glutamate receptor, metabotropic 1                                              | 8.40E-06 | No  | No  | Yes | No  | No  | No  | No |
| 51699  | VPS29    | vacuolar protein sorting 29 homolog (S. cerevisiae)                             | 8.40E-06 | No  | No  | Yes | No  | No  | Yes | No |
| 677822 | SNORA40  | small nucleolar RNA, H/ACA box 40                                               | 8.41E-06 | NA  | No  | Yes | No  | No  | No  | No |
| 9168   | TMSB10   | thymosin beta 10                                                                | 8.45E-06 | No  | No  | No  | Yes | No  | No  | No |
| 517    | ATP5G2   | ATP synthase, H+ transporting, mitochondrial F0 complex, subunit C2 (subunit 9) | 8.52E-06 | No  | No  | No  | Yes | No  | No  | No |
| 133383 | C5orf35  | chromosome 5 open reading frame 35                                              | 8.55E-06 | No  | No  | Yes | No  | No  | No  | No |
| 23479  | ISCU     | iron-sulfur cluster scaffold homolog (E. coli)                                  | 8.58E-06 | Yes | No  | No  | Yes | No  | No  | No |
| 9733   | SART3    | squamous cell carcinoma antigen recognized by T cells 3                         | 8.58E-06 | No  | No  | No  | Yes | No  | No  | No |
| 65981  | CAPRIN2  | caprin family member 2                                                          | 8.60E-06 | Yes | No  | Yes | No  | No  | Yes | No |
| 92806  | MGC16385 | hypothetical protein MGC16385                                                   | 8.62E-06 | No  | No  | Yes | No  | No  | No  | No |
| 391109 | OR10K1   | olfactory receptor, family 10, subfamily K, member 1                            | 8.62E-06 | NA  | No  | Yes | No  | No  | No  | No |
| 29941  | PKN3     | protein kinase N3                                                               | 8.63E-06 | No  | No  | No  | No  | No  | No  | No |
| 4907   | NT5E     | 5'-nucleotidase, ecto (CD73)                                                    | 8.65E-06 | Yes | Yes | Yes | No  | No  | No  | No |
| 167359 | MGC42105 | hypothetical protein MGC42105                                                   | 8.67E-06 | No  | No  | Yes | No  | No  | No  | No |
| 79666  | PLEKHF2  | pleckstrin homology domain containing, family F (with FYVE domain) member 2     | 8.68E-06 | No  | Yes | Yes | No  | No  | Yes | No |
| 7090   | TLE3     | transducin-like enhancer of split 3 (E(sp1) homolog, Drosophila)                | 8.68E-06 | Yes | No  | Yes | No  | No  | No  | No |
| 10220  | GDF11    | growth differentiation factor 11                                                | 8.70E-06 | Yes | No  | Yes | No  | No  | No  | No |
| 967    | CD63     | CD63 molecule                                                                   | 8.70E-06 | Yes | No  | Yes | No  | No  | No  | No |
| 54840  | APTX     | aprataxin                                                                       | 8.70E-06 | No  | No  | Yes | No  | No  | No  | No |
| 3842   | TNPO1    | transportin 1                                                                   | 8.73E-06 | No  | No  | No  | Yes | No  | No  | No |
| 9675   | KIAA0406 | KIAA0406                                                                        | 8.78E-06 | No  | No  | No  | No  | No  | No  | No |
| 92737  | DNER     | delta/notch-like EGF repeat containing                                          | 8.79E-06 | No  | No  | Yes | No  | No  | No  | No |
| 87178  | PNPT1    | polynucleotide nucleotidyltransferase 1                                         | 8.79E-06 | No  | No  | Yes | No  | No  | No  | No |
| 51157  | ZNF580   | zinc finger protein 580                                                         | 8.80E-06 | No  | No  | No  | No  | Yes | Yes | No |
| 4267   | CD99     | CD99 molecule                                                                   | 8.81E-06 | Yes | No  | Yes | No  | No  | No  | No |
| 8022   | LHX3     | LIM homeobox 3                                                                  | 8.82E-06 | No  | Yes | No  | Yes | No  | No  | No |
| 23411  | SIRT1    | sirtuin (silent mating type information regulation 2 homolog) 1 (S. cerevisiae) | 8.82E-06 | No  | No  | Yes | No  | No  | No  | No |
| 692223 | SNORD97  | small nucleolar RNA, C/D box 97                                                 | 8.82E-06 | NA  | No  | Yes | No  | No  | No  | No |
| 219902 | TMEM136  | transmembrane protein 136                                                       | 8.83E-06 | Yes | No  | No  | Yes | No  | No  | No |
| 5528   | PPP2R5D  | protein phosphatase 2, regulatory subunit B', delta isoform                     | 8.83E-06 | No  | No  | Yes | No  | No  | No  | No |
| 5190   | PEX6     | peroxisomal biogenesis factor 6                                                 | 8.83E-06 | No  | No  | Yes | No  | No  | No  | No |

|        |           |                                                                                            |          |     |    |     |     |     |     |    |
|--------|-----------|--------------------------------------------------------------------------------------------|----------|-----|----|-----|-----|-----|-----|----|
| 6005   | RHAG      | Rh-associated glycoprotein                                                                 | 8.85E-06 | Yes | No | Yes | No  | No  | No  | No |
| 11221  | DUSP10    | dual specificity phosphatase 10                                                            | 8.85E-06 | No  | No | Yes | No  | No  | No  | No |
| 379    | ARL4D     | ADP-ribosylation factor-like 4D                                                            | 8.86E-06 | No  | No | Yes | No  | No  | No  | No |
| 84250  | ANKRD32   | ankyrin repeat domain 32                                                                   | 8.87E-06 | No  | No | Yes | No  | No  | No  | No |
| 54971  | BANP      | BTG3 associated nuclear protein                                                            | 8.90E-06 | No  | No | Yes | No  | No  | No  | No |
| 10247  | HRSP12    | heat-responsive protein 12                                                                 | 8.91E-06 | No  | No | Yes | No  | No  | Yes | No |
| 147179 | WIPF2     | WAS/WASL interacting protein family, member 2                                              | 8.94E-06 | Yes | No | Yes | No  | No  | No  | No |
| 23161  | SNX13     | sorting nexin 13                                                                           | 8.97E-06 | No  | No | No  | Yes | No  | No  | No |
| 23365  | ARHGEF12  | Rho guanine nucleotide exchange factor (GEF) 12                                            | 8.98E-06 | No  | No | Yes | No  | No  | No  | No |
| 126637 | TCHHL1    | trichohyalin-like 1                                                                        | 9.07E-06 | NA  | No | Yes | No  | No  | No  | No |
| 22823  | MTF2      | metal response element binding transcription factor 2                                      | 9.07E-06 | No  | No | Yes | No  | No  | No  | No |
| 1062   | CENPE     | centromere protein E, 312kDa                                                               | 9.15E-06 | No  | No | Yes | No  | No  | Yes | No |
| 65057  | ACD       | adrenocortical dysplasia homolog (mouse)                                                   | 9.16E-06 | No  | No | No  | Yes | No  | No  | No |
| 51131  | PHF11     | PHD finger protein 11                                                                      | 9.20E-06 | Yes | No | Yes | No  | No  | No  | No |
| 1647   | GADD45A   | growth arrest and DNA-damage-inducible, alpha                                              | 9.24E-06 | No  | No | Yes | No  | No  | No  | No |
| 7385   | UQCRC2    | ubiquinol-cytochrome c reductase core protein II                                           | 9.25E-06 | No  | No | Yes | No  | No  | No  | No |
| 201633 | VSTM3     | V-set and transmembrane domain containing 3                                                | 9.26E-06 | No  | No | Yes | No  | No  | No  | No |
| 117155 | CATSPER2  | cation channel, sperm associated 2                                                         | 9.26E-06 | Yes | No | Yes | No  | No  | No  | No |
| 3012   | HIST1H2AE | histone cluster 1, H2ae                                                                    | 9.29E-06 | No  | No | Yes | No  | No  | No  | No |
| 9735   | KNTC1     | kinetochore associated 1                                                                   | 9.32E-06 | No  | No | Yes | No  | No  | Yes | No |
| 25879  | WDSOF1    | WD repeats and SOF1 domain containing                                                      | 9.33E-06 | Yes | No | Yes | No  | No  | Yes | No |
| 10285  | SMNDC1    | survival motor neuron domain containing 1                                                  | 9.50E-06 | No  | No | No  | No  | No  | No  | No |
| 57567  | ZNF319    | zinc finger protein 319                                                                    | 9.57E-06 | No  | No | No  | Yes | No  | No  | No |
| 340273 | ABCB5     | ATP-binding cassette, sub-family B (MDR/TAP), member 5                                     | 9.59E-06 | Yes | No | Yes | No  | No  | No  | No |
| 1075   | CTSC      | cathepsin C                                                                                | 9.60E-06 | Yes | No | Yes | No  | No  | No  | No |
| 6822   | SULT2A1   | sulfotransferase family, cytosolic, 2A, dehydroepiandrosterone (DHEA)-preferring, member 1 | 9.63E-06 | No  | No | No  | No  | Yes | No  | No |
| 81631  | MAP1LC3B  | microtubule-associated protein 1 light chain 3 beta                                        | 9.64E-06 | No  | No | Yes | No  | No  | No  | No |
| 79791  | FBXO31    | F-box protein 31                                                                           | 9.64E-06 | No  | No | Yes | No  | No  | No  | No |
| 3092   | HIP1      | huntingtin interacting protein 1                                                           | 9.67E-06 | No  | No | No  | Yes | No  | No  | No |
| 11025  | LILRB3    | leukocyte immunoglobulin-like receptor, subfamily B (with TM and ITIM domains), member 3   | 9.68E-06 | No  | No | No  | No  | No  | No  | No |
| 26276  | VPS33B    | vacuolar protein sorting 33 homolog B (yeast)                                              | 9.71E-06 | Yes | No | Yes | No  | No  | Yes | No |
| 22850  | ADNP2     | ADNP homeobox 2                                                                            | 9.72E-06 | No  | No | Yes | No  | No  | No  | No |
| 8720   | MBTPS1    | membrane-bound transcription factor peptidase, site 1                                      | 9.72E-06 | No  | No | No  | Yes | No  | No  | No |
| 10940  | POP1      | processing of precursor 1, ribonuclease P/MRP subunit (S. cerevisiae)                      | 9.72E-06 | NA  | No | No  | Yes | No  | No  | No |

|        |         |                                                                     |          |     |     |     |     |     |     |    |
|--------|---------|---------------------------------------------------------------------|----------|-----|-----|-----|-----|-----|-----|----|
| 23197  | UBXD8   | UBX domain containing 8                                             | 9.72E-06 | No  | No  | No  | Yes | No  | No  | No |
| 10513  | APPBP2  | amyloid beta precursor protein (cytoplasmic tail) binding protein 2 | 9.76E-06 | Yes | No  | Yes | No  | No  | No  | No |
| 4005   | LMO2    | LIM domain only 2 (rhombotin-like 1)                                | 9.77E-06 | No  | Yes | No  | Yes | No  | No  | No |
| 10975  | UOCR    | ubiquinol-cytochrome c reductase, 6.4kDa subunit                    | 9.81E-06 | No  | No  | Yes | No  | No  | Yes | No |
| 7773   | ZNF230  | zinc finger protein 230                                             | 9.82E-06 | No  | No  | No  | Yes | No  | Yes | No |
| 27107  | ZBTB11  | zinc finger and BTB domain containing 11                            | 9.82E-06 | No  | No  | Yes | No  | No  | No  | No |
| 116540 | MRPL53  | mitochondrial ribosomal protein L53                                 | 9.83E-06 | No  | No  | Yes | No  | No  | No  | No |
| 619565 | SNORA52 | small nucleolar RNA, H/ACA box 52                                   | 9.85E-06 | NA  | No  | No  | No  | Yes | No  | No |
| 51058  | ZNF691  | zinc finger protein 691                                             | 9.86E-06 | No  | No  | Yes | No  | No  | No  | No |
| 57325  | CSRP2BP | CSRP2 binding protein                                               | 9.88E-06 | No  | No  | No  | No  | No  | No  | No |
| 8452   | CUL3    | culin 3                                                             | 9.91E-06 | No  | Yes | Yes | No  | No  | No  | No |
| 10092  | ARPC5   | actin related protein 2/3 complex, subunit 5, 16kDa                 | 9.94E-06 | No  | No  | Yes | No  | No  | Yes | No |
| 26017  | FAM32A  | family with sequence similarity 32, member A                        | 9.95E-06 | No  | No  | No  | Yes | No  | No  | No |
| 8812   | CCNK    | cyclin K                                                            | 9.95E-06 | Yes | No  | Yes | No  | No  | No  | No |
| 8445   | DYRK2   | dual-specificity tyrosine-(Y)-phosphorylation regulated kinase 2    | 9.95E-06 | Yes | No  | No  | No  | No  | No  | No |
| 3615   | IMPDH2  | IMP (inosine monophosphate) dehydrogenase 2                         | 9.96E-06 | No  | No  | Yes | No  | No  | No  | No |
| 10256  | CNKSR1  | connector enhancer of kinase suppressor of Ras 1                    | 9.97E-06 | No  | No  | No  | Yes | No  | No  | No |
| 5885   | RAD21   | RAD21 homolog (S. pombe)                                            | 9.98E-06 | No  | No  | Yes | No  | No  | No  | No |
| 55907  | CMAS    | cytidine monophosphate N-acetylneuraminic acid synthetase           | 9.99E-06 | No  | No  | Yes | No  | No  | No  | No |
| 55269  | PSPC1   | paraspeckle component 1                                             | 9.99E-06 | No  | No  | Yes | No  | No  | No  | No |
| 85007  | AGXT2L2 | alanine-glyoxylate aminotransferase 2-like 2                        | 1.00E-05 | No  | No  | No  | Yes | No  | No  | No |
| 7726   | TRIM26  | tripartite motif-containing 26                                      | 1.00E-05 | No  | No  | No  | Yes | No  | No  | No |
| 163496 | DENND1B | DENND1B domain containing 1B                                        | 1.00E-05 | No  | No  | Yes | No  | No  | No  | No |
| 84690  | SPATA22 | spermatogenesis associated 22                                       | 1.00E-05 | Yes | No  | Yes | No  | No  | No  | No |
| 443    | ASPA    | aspartoacylase (Canavan disease)                                    | 1.00E-05 | Yes | No  | Yes | No  | No  | No  | No |
| 10038  | PARP2   | poly (ADP-ribose) polymerase family, member 2                       | 1.00E-05 | No  | No  | Yes | No  | No  | No  | No |
| 949    | SCARB1  | scavenger receptor class B, member 1                                | 1.00E-05 | No  | Yes | No  | Yes | No  | No  | No |
| 7156   | TOP3A   | topoisomerase (DNA) III alpha                                       | 1.01E-05 | No  | No  | Yes | No  | No  | No  | No |
| 8545   | CGGBP1  | CGG triplet repeat binding protein 1                                | 1.02E-05 | No  | No  | Yes | No  | No  | Yes | No |
| 3791   | KDR     | kinase insert domain receptor (a type III receptor tyrosine kinase) | 1.02E-05 | No  | No  | Yes | No  | No  | No  | No |
| 5210   | PFKFB4  | 6-phosphofructo-2-kinase/fructose-2,6-bisphosphatase 4              | 1.02E-05 | No  | No  | Yes | No  | No  | No  | No |
| 4863   | NPAT    | nuclear protein, ataxia-telangiectasia locus                        | 1.03E-05 | No  | No  | Yes | No  | No  | Yes | No |
| 2535   | FZD2    | frizzled homolog 2 (Drosophila)                                     | 1.03E-05 | No  | No  | No  | No  | No  | No  | No |
| 391712 | TRIM61  | tripartite motif-containing 61                                      | 1.03E-05 | No  | No  | No  | No  | No  | No  | No |



|        |          |                                                                                           |          |     |     |     |     |     |     |     |
|--------|----------|-------------------------------------------------------------------------------------------|----------|-----|-----|-----|-----|-----|-----|-----|
| 54472  | TOLLIP   | toll interacting protein                                                                  | 1.03E-05 | No  |
| 84081  | CCDC55   | coiled-coil domain containing 55                                                          | 1.03E-05 | No  | Yes | Yes | No  | No  | Yes | No  |
| 10971  | YWHAQ    | tyrosine 3-monooxygenase/tryptophan 5-monooxygenase activation protein, theta polypeptide | 1.04E-05 | No  | No  | No  | No  | Yes | No  | No  |
| 84085  | FBXO30   | F-box protein 30                                                                          | 1.04E-05 | No  | No  | Yes | No  | No  | No  | No  |
| 55353  | LAPTM4B  | lysosomal associated protein transmembrane 4 beta                                         | 1.04E-05 | No  | No  | No  | Yes | No  | No  | No  |
| 171023 | ASXL1    | additional sex combs like 1 (Drosophila)                                                  | 1.05E-05 | No  | Yes | Yes | No  | No  | Yes | No  |
| 120400 | FAM55A   | family with sequence similarity 55, member A                                              | 1.05E-05 | No  | No  | Yes | No  | No  | No  | No  |
| 84329  | HVCN1    | hydrogen voltage-gated channel 1                                                          | 1.05E-05 | Yes | No  | No  | Yes | No  | No  | No  |
| 4643   | MYO1E    | myosin IE                                                                                 | 1.05E-05 | No  | Yes | No  | Yes | No  | No  | No  |
| 79954  | NOL10    | nucleolar protein 10                                                                      | 1.05E-05 | Yes | No  | No  | Yes | No  | No  | No  |
| 54918  | CMTM6    | CKLF-like MARVEL transmembrane domain containing 6                                        | 1.05E-05 | Yes | No  | No  | No  | Yes | No  | No  |
| 6993   | DYNLT1   | dynein, light chain, Tctex-type 1                                                         | 1.05E-05 | No  | No  | Yes | No  | No  | No  | No  |
| 55293  | UEVLD    | UEV and lactate/malate dehydrogenase domains                                              | 1.05E-05 | No  | No  | Yes | No  | No  | No  | No  |
| 9334   | B4GALT5  | UDP-Gal:beta.GlcNAc beta 1,4-galactosyltransferase, polypeptide 5                         | 1.05E-05 | No  | No  | No  | Yes | No  | No  | No  |
| 11249  | NXPH2    | neurexophilin 2                                                                           | 1.06E-05 | No  | No  | No  | Yes | No  | No  | No  |
| 125058 | TBC1D16  | TBC1 domain family, member 16                                                             | 1.06E-05 | Yes | No  | Yes | No  | No  | No  | No  |
| 149428 | BNIP1    | BCL2/adenovirus E1B 19kD interacting protein like                                         | 1.06E-05 | No  | No  | Yes | No  | No  | No  | No  |
| 51088  | KLHL5    | kelch-like 5 (Drosophila)                                                                 | 1.06E-05 | No  | Yes | No  | Yes | No  | No  | No  |
| 8099   | CDK2AP1  | CDK2-associated protein 1                                                                 | 1.06E-05 | No  |
| 84276  | NICN1    | nicotin 1                                                                                 | 1.07E-05 | No  | No  | No  | Yes | No  | No  | No  |
| 8887   | TAX1BP1  | Tax1 (human T-cell leukemia virus type I) binding protein 1                               | 1.07E-05 | No  | No  | Yes | No  | No  | No  | No  |
| 57584  | ARHGAP21 | Rho GTPase activating protein 21                                                          | 1.07E-05 | No  | No  | No  | Yes | No  | No  | No  |
| 79086  | C19orf42 | chromosome 19 open reading frame 42                                                       | 1.08E-05 | No  | No  | Yes | No  | No  | No  | No  |
| 79041  | TMEM38A  | transmembrane protein 38A                                                                 | 1.08E-05 | NA  | No  | No  | Yes | No  | No  | No  |
| 8322   | FZD4     | frizzled homolog 4 (Drosophila)                                                           | 1.08E-05 | Yes | Yes | Yes | No  | No  | No  | No  |
| 122046 | C13orf26 | chromosome 13 open reading frame 26                                                       | 1.08E-05 | No  | No  | Yes | No  | No  | No  | No  |
| 9236   | CCPG1    | cell cycle progression 1                                                                  | 1.08E-05 | Yes | No  | Yes | No  | No  | No  | No  |
| 84717  | HDGF2    | hepatoma-derived growth factor-related protein 2                                          | 1.08E-05 | No  |
| 9969   | MED13    | mediator complex subunit 13                                                               | 1.08E-05 | Yes | No  | Yes | No  | No  | No  | No  |
| 3428   | IFI16    | interferon, gamma-inducible protein 16                                                    | 1.10E-05 | Yes | Yes | No  | No  | Yes | No  | No  |
| 3383   | ICAM1    | intercellular adhesion molecule 1 (CD54), human rhinovirus receptor                       | 1.10E-05 | Yes | No  | No  | Yes | No  | Yes | No  |
| 25948  | KBTBD2   | kelch repeat and BTB (POZ) domain containing 2                                            | 1.11E-05 | No  | No  | Yes | No  | No  | Yes | Yes |
| 143686 | SESN3    | sesttin 3                                                                                 | 1.11E-05 | Yes | No  | Yes | No  | No  | No  | No  |
| 122830 | NAT12    | N-acetyltransferase 12                                                                    | 1.11E-05 | No  | No  | Yes | No  | No  | No  | No  |

|        |               |                                                                            |          |     |     |     |     |     |     |    |
|--------|---------------|----------------------------------------------------------------------------|----------|-----|-----|-----|-----|-----|-----|----|
| 8820   | HESX1         | HESX homeobox 1                                                            | 1.11E-05 | Yes | No  | Yes | No  | No  | No  | No |
| 84941  | HSH2D         | hematopoietic SH2 domain containing                                        | 1.11E-05 | Yes | No  | No  | Yes | No  | No  | No |
| 84073  | MYCBPAP       | MYCBP associated protein                                                   | 1.12E-05 | No  | No  | No  | Yes | No  | No  | No |
| 5699   | PSMB10        | proteasome (prosome, macropain) subunit, beta type, 10                     | 1.12E-05 | No  | No  | No  | Yes | No  | Yes | No |
| 10243  | GPHN          | gephyrin                                                                   | 1.12E-05 | No  | No  | Yes | No  | No  | No  | No |
| 55764  | IFT122        | intraflagellar transport 122 homolog (Chlamydomonas)                       | 1.12E-05 | No  | Yes | Yes | No  | No  | No  | No |
| 60681  | FKBP10        | FK506 binding protein 10, 65 kDa                                           | 1.12E-05 | Yes | No  | No  | Yes | No  | No  | No |
| 10609  | SC65          | synaptonemal complex protein SC65                                          | 1.12E-05 | No  | No  | No  | Yes | No  | No  | No |
| 8851   | CDK5R1        | cyclin-dependent kinase 5, regulatory subunit 1 (p35)                      | 1.13E-05 | Yes | No  | No  | No  | No  | No  | No |
| 6404   | SELPLG        | selectin P ligand                                                          | 1.13E-05 | Yes | No  | Yes | No  | No  | Yes | No |
| 6252   | RTN1          | reticulon 1                                                                | 1.13E-05 | No  | No  | Yes | No  | No  | No  | No |
| 677797 | SNORA7B       | small nucleolar RNA, H/ACA box 7B                                          | 1.13E-05 | NA  | No  | Yes | No  | No  | No  | No |
| 5049   | PAFAH1B2      | platelet-activating factor acetylhydrolase, isoform Ib, beta subunit 30kDa | 1.14E-05 | No  | No  | Yes | No  | No  | No  | No |
| 154197 | PNLDC1        | poly(A)-specific ribonuclease (PARN)-like domain containing 1              | 1.14E-05 | Yes | No  | Yes | No  | No  | No  | No |
| 56943  | ENY2          | enhancer of yellow 2 homolog (Drosophila)                                  | 1.14E-05 | No  | No  | Yes | No  | No  | No  | No |
| 5055   | SERPINB2      | serpin peptidase inhibitor, clade B (ovalbumin), member 2                  | 1.14E-05 | No  | No  | Yes | No  | No  | No  | No |
| 115948 | CDC151        | coiled-coil domain containing 151                                          | 1.14E-05 | No  | No  | No  | Yes | No  | No  | No |
| 5589   | PRKCSH        | protein kinase C substrate 80K-H                                           | 1.14E-05 | No  | No  | No  | Yes | No  | No  | No |
| 84942  | WDR73         | WD repeat domain 73                                                        | 1.14E-05 | Yes | No  | No  | Yes | No  | Yes | No |
| 93986  | FOXP2         | forkhead box P2                                                            | 1.15E-05 | Yes | No  | Yes | No  | No  | No  | No |
| 9730   | VPRBP         | Vpr (HIV-1) binding protein                                                | 1.15E-05 | No  | No  | Yes | No  | No  | No  | No |
| 5132   | PDC           | phosducin                                                                  | 1.15E-05 | No  | No  | Yes | No  | No  | No  | No |
| 9678   | PHF14         | PHD finger protein 14                                                      | 1.16E-05 | No  | No  | Yes | No  | No  | No  | No |
| 7056   | THBD          | thrombomodulin                                                             | 1.16E-05 | No  | No  | Yes | No  | No  | No  | No |
| 25851  | DKFZP434B0335 | DKFZP434B0335 protein                                                      | 1.17E-05 | Yes | No  | No  | Yes | No  | Yes | No |
| 158358 | KIAA2026      | KIAA2026                                                                   | 1.17E-05 | No  | No  | Yes | No  | No  | No  | No |
| 4593   | MUSK          | muscle, skeletal, receptor tyrosine kinase                                 | 1.18E-05 | No  | No  | Yes | No  | No  | No  | No |
| 55145  | THAP1         | THAP domain containing, apoptosis associated protein 1                     | 1.18E-05 | No  | No  | Yes | No  | No  | No  | No |
| 7772   | ZNF229        | zinc finger protein 229                                                    | 1.18E-05 | No  | No  | Yes | No  | No  | No  | No |
| 1107   | CHD3          | chromodomain helicase DNA binding protein 3                                | 1.18E-05 | Yes | Yes | No  | No  | Yes | No  | No |
| 1394   | CRHR1         | corticotropin releasing hormone receptor 1                                 | 1.18E-05 | Yes | No  | No  | No  | No  | No  | No |
| 58986  | TMEM8         | transmembrane protein 8 (five membrane-spanning domains)                   | 1.19E-05 | No  | No  | No  | Yes | No  | Yes | No |
| 1738   | DLD           | dihydropyrimidine dehydrogenase                                            | 1.19E-05 | No  | No  | No  | No  | Yes | No  | No |
| 57862  | ZNF410        | zinc finger protein 410                                                    | 1.19E-05 | No  | No  | Yes | No  | No  | No  | No |

|        |          |                                                              |          |     |     |     |     |     |     |     |
|--------|----------|--------------------------------------------------------------|----------|-----|-----|-----|-----|-----|-----|-----|
| 26009  | ZZZ3     | zinc finger, ZZ-type containing 3                            | 1.20E-05 | No  | No  | Yes | No  | No  | No  | No  |
| 9252   | RPS6KA5  | ribosomal protein S6 kinase, 90kDa, polypeptide 5            | 1.20E-05 | Yes | Yes | Yes | No  | No  | No  | No  |
| 51444  | RNF138   | ring finger protein 138                                      | 1.20E-05 | No  | No  | Yes | No  | No  | No  | No  |
| 29117  | BRD7     | bromodomain containing 7                                     | 1.20E-05 | No  | No  | Yes | No  | No  | No  | No  |
| 221154 | EFHA1    | EF-hand domain family, member A1                             | 1.20E-05 | No  | No  | Yes | No  | No  | No  | No  |
| 25803  | SPDEF    | SAM pointed domain containing ets transcription factor       | 1.21E-05 | Yes | No  | No  | No  | Yes | No  | No  |
| 153    | ADRB1    | adrenergic, beta-1-, receptor                                | 1.21E-05 | No  | No  | No  | Yes | No  | No  | No  |
| 5309   | PITX3    | paired-like homeodomain 3                                    | 1.21E-05 | No  | No  | Yes | No  | No  | No  | No  |
| 51362  | CDC40    | cell division cycle 40 homolog (S. cerevisiae)               | 1.21E-05 | No  | No  | Yes | No  | No  | No  | No  |
| 8936   | WASF1    | WAS protein family, member 1                                 | 1.21E-05 | No  | No  | Yes | No  | No  | No  | No  |
| 91703  | ACY3     | aspartoacylase (aminocyclase) 3                              | 1.21E-05 | No  | No  | Yes | No  | No  | No  | No  |
| 10912  | GADD45G  | growth arrest and DNA-damage-inducible, gamma                | 1.21E-05 | No  | No  | Yes | No  | No  | No  | No  |
| 51542  | VPS54    | vacuolar protein sorting 54 homolog (S. cerevisiae)          | 1.22E-05 | No  | No  | Yes | No  | No  | No  | No  |
| 23438  | HARS2    | histidyl-tRNA synthetase 2, mitochondrial (putative)         | 1.22E-05 | Yes | No  | Yes | No  | No  | No  | No  |
| 5635   | PRPSAP1  | phosphoribosyl pyrophosphate synthetase-associated protein 1 | 1.22E-05 | No  | No  | Yes | No  | No  | No  | No  |
| 84759  | PCGF1    | polycomb group ring finger 1                                 | 1.22E-05 | No  | No  | No  | Yes | No  | No  | No  |
| 81875  | ISG20L2  | interferon stimulated exonuclease gene 20kDa-like 2          | 1.23E-05 | Yes | No  | No  | No  | Yes | No  | No  |
| 2869   | GRK5     | G protein-coupled receptor kinase 5                          | 1.23E-05 | Yes | No  | Yes | No  | No  | No  | No  |
| 10325  | RRAGB    | Ras-related GTP binding B                                    | 1.23E-05 | No  | No  | No  | Yes | No  | Yes | Yes |
| 5424   | POLD1    | polymerase (DNA directed), delta 1, catalytic subunit 125kDa | 1.23E-05 | No  | No  | Yes | No  | No  | No  | No  |
| 8777   | MPDZ     | multiple PDZ domain protein                                  | 1.24E-05 | No  | No  | Yes | No  | No  | No  | No  |
| 6006   | RHCE     | Rh blood group, CcEe antigens                                | 1.24E-05 | Yes | No  | Yes | No  | No  | No  | No  |
| 200162 | SPAG17   | sperm associated antigen 17                                  | 1.24E-05 | Yes | No  | Yes | No  | No  | No  | No  |
| 4811   | NID1     | nidogen 1                                                    | 1.25E-05 | Yes | No  | Yes | No  | No  | No  | No  |
| 1454   | CSNK1E   | casein kinase 1, epsilon                                     | 1.25E-05 | No  | No  | Yes | No  | No  | No  | No  |
| 200014 | CC2D1B   | coiled-coil and C2 domain containing 1B                      | 1.25E-05 | Yes | No  | No  | No  | No  | No  | No  |
| 123811 | C16orf63 | chromosome 16 open reading frame 63                          | 1.26E-05 | No  | No  | Yes | No  | No  | No  | No  |
| 8216   | LZTR1    | leucine-zipper-like transcription regulator 1                | 1.26E-05 | No  | No  | No  | Yes | No  | No  | No  |
| 115752 | DIS3L    | DIS3 mitotic control homolog (S. cerevisiae)-like            | 1.26E-05 | No  | Yes | Yes | No  | No  | No  | No  |
| 5745   | PTH1R    | parathyroid hormone receptor 1                               | 1.26E-05 | No  | No  | Yes | No  | No  | No  | No  |
| 5036   | PA2G4    | proliferation-associated 2G4, 38kDa                          | 1.26E-05 | No  | No  | No  | Yes | No  | No  | No  |
| 196335 | OR56B4   | olfactory receptor, family 56, subfamily B, member 4         | 1.27E-05 | NA  | No  | No  | Yes | No  | No  | No  |
| 9772   | KIAA0195 | KIAA0195                                                     | 1.27E-05 | No  | No  | Yes | No  | No  | No  | No  |
| 79135  | APOO     | apolipoprotein O                                             | 1.27E-05 | No  | No  | Yes | No  | No  | No  | No  |

|        |           |                                                                  |          |     |     |     |     |     |     |     |
|--------|-----------|------------------------------------------------------------------|----------|-----|-----|-----|-----|-----|-----|-----|
| 3949   | LDLR      | low density lipoprotein receptor (familial hypercholesterolemia) | 1.27E-05 | No  | No  | No  | Yes | No  | Yes | No  |
| 3622   | ING2      | inhibitor of growth family, member 2                             | 1.28E-05 | No  |
| 84722  | PSRC1     | proline/serine-rich coiled-coil 1                                | 1.28E-05 | No  | No  | No  | No  | Yes | No  | No  |
| 151295 | SLC23A3   | solute carrier family 23 (nucleobase transporters), member 3     | 1.29E-05 | No  | No  | No  | Yes | No  | No  | No  |
| 2188   | FANCF     | Fanconi anemia, complementation group F                          | 1.29E-05 | No  | No  | Yes | No  | No  | No  | No  |
| 6772   | STAT1     | signal transducer and activator of transcription 1, 91kDa        | 1.29E-05 | Yes | No  | Yes | No  | No  | No  | No  |
| 53829  | P2RY13    | purinergic receptor P2Y, G-protein coupled, 13                   | 1.29E-05 | Yes | No  | Yes | No  | No  | No  | No  |
| 7096   | TLR1      | tolllike receptor 1                                              | 1.29E-05 | Yes | No  | No  | Yes | No  | Yes | Yes |
| 153733 | CCDC112   | coiled-coil domain containing 112                                | 1.29E-05 | NA  | No  | Yes | No  | No  | No  | No  |
| 79856  | SNX22     | sorting nexin 22                                                 | 1.30E-05 | No  | No  | No  | Yes | No  | No  | No  |
| 203859 | TMEM16E   | transmembrane protein 16E                                        | 1.31E-05 | NA  | No  | No  | Yes | No  | No  | No  |
| 2587   | GALR1     | galanin receptor 1                                               | 1.31E-05 | No  | No  | Yes | No  | No  | No  | No  |
| 3189   | HNRNPH3   | heterogeneous nuclear ribonucleoprotein H3 (2H9)                 | 1.31E-05 | No  | Yes | Yes | No  | No  | No  | No  |
| 55729  | ATF7IP    | activating transcription factor 7 interacting protein            | 1.31E-05 | Yes | No  | Yes | No  | No  | Yes | No  |
| 89778  | SERPINB11 | serpin peptidase inhibitor, clade B (ovalbumin), member 11       | 1.31E-05 | No  | No  | Yes | No  | No  | No  | No  |
| 56850  | GRIPAP1   | GRIP1 associated protein 1                                       | 1.32E-05 | No  | No  | Yes | No  | No  | No  | No  |
| 64768  | IPPK      | inositol 1,3,4,5,6-pentakisphosphate 2-kinase                    | 1.32E-05 | NA  | No  | No  | Yes | No  | No  | No  |
| 10152  | ABI2      | abl Interactor 2                                                 | 1.32E-05 | Yes | No  | No  | Yes | No  | No  | No  |
| 3799   | KIF5B     | kinesin family member 5B                                         | 1.32E-05 | No  | No  | Yes | No  | No  | No  | No  |
| 390058 | OR51B6    | olfactory receptor, family 51, subfamily B, member 6             | 1.33E-05 | No  | No  | Yes | No  | No  | No  | No  |
| 282763 | OR51B5    | olfactory receptor, family 51, subfamily B, member 5             | 1.33E-05 | No  | No  | Yes | No  | No  | No  | No  |
| 79136  | LY6G6E    | lymphocyte antigen 6 complex, locus G6E                          | 1.33E-05 | No  | No  | No  | Yes | No  | No  | No  |
| 144193 | AMDHD1    | amidohydrolase domain containing 1                               | 1.34E-05 | Yes | No  | Yes | No  | No  | No  | No  |
| 966    | CD59      | CD59 molecule, complement regulatory protein                     | 1.34E-05 | No  | No  | No  | Yes | No  | No  | No  |
| 84769  | FKSG24    | hypothetical protein MGC12972                                    | 1.34E-05 | No  | No  | No  | No  | Yes | No  | No  |
| 55346  | TCP11L1   | t-complex 11 (mouse)-like 1                                      | 1.35E-05 | No  | No  | Yes | No  | No  | No  | No  |
| 64145  | ZFYVE20   | zinc finger, FYVE domain containing 20                           | 1.35E-05 | No  | No  | No  | No  | Yes | No  | No  |
| 7007   | TECTA     | tectorin alpha                                                   | 1.36E-05 | No  | No  | Yes | No  | No  | No  | No  |
| 140459 | ASB6      | ankyrin repeat and SOCS box-containing 6                         | 1.36E-05 | No  |
| 29933  | GPR132    | G protein-coupled receptor 132                                   | 1.36E-05 | Yes | No  | No  | Yes | No  | No  | No  |
| 123036 | TC2N      | tandem C2 domains, nuclear                                       | 1.36E-05 | No  | No  | Yes | No  | No  | No  | No  |
| 124637 | CYB5D1    | cytochrome b5 domain containing 1                                | 1.37E-05 | No  | No  | Yes | No  | No  | Yes | No  |
| 2100   | ESR2      | estrogen receptor 2 (ER beta)                                    | 1.37E-05 | Yes | No  | Yes | No  | No  | No  | No  |
| 752    | FMNL1     | formin-like 1                                                    | 1.38E-05 | Yes | No  | No  | Yes | No  | No  | No  |

|        |           |                                                                                            |          |     |     |     |     |     |     |    |
|--------|-----------|--------------------------------------------------------------------------------------------|----------|-----|-----|-----|-----|-----|-----|----|
| 13804  | OR13C4    | olfactory receptor, family 13, subfamily C, member 4                                       | 1.38E-05 | NA  | No  | No  | Yes | No  | No  | No |
| 5631   | PRPS1     | phosphoribosyl pyrophosphate synthetase 1                                                  | 1.38E-05 | No  | No  | Yes | No  | No  | No  | No |
| 1635   | DCTD      | dCMP deaminase                                                                             | 1.38E-05 | Yes | Yes | Yes | No  | No  | No  | No |
| 9744   | CENTB1    | centaurin, beta 1                                                                          | 1.38E-05 | Yes | No  | Yes | No  | No  | No  | No |
| 84461  | KIAA1787  | KIAA1787 protein                                                                           | 1.38E-05 | No  | No  | Yes | No  | No  | No  | No |
| 400223 | C14orf181 | chromosome 14 open reading frame 181                                                       | 1.38E-05 | No  | No  | Yes | No  | No  | No  | No |
| 10629  | TAF6L     | TAF6-like RNA polymerase II, p300/CBP-associated factor (PCAF)-associated factor, 65kDa    | 1.39E-05 | Yes | No  | No  | No  | Yes | No  | No |
| 9282   | MED14     | mediator complex subunit 14                                                                | 1.39E-05 | Yes | No  | Yes | No  | No  | No  | No |
| 9495   | AKAP5     | A kinase (PRKA) anchor protein 5                                                           | 1.39E-05 | Yes | No  | Yes | No  | No  | No  | No |
| 64399  | HHIP      | hedgehog interacting protein                                                               | 1.39E-05 | Yes | No  | Yes | No  | No  | No  | No |
| 283232 | TMEM80    | transmembrane protein 80                                                                   | 1.39E-05 | No  | No  | No  | Yes | No  | No  | No |
| 9355   | LHX2      | LIM homeobox 2                                                                             | 1.41E-05 | Yes | No  | No  | Yes | No  | No  | No |
| 150696 | PROM2     | prominin 2                                                                                 | 1.42E-05 | No  | No  | No  | Yes | No  | No  | No |
| 1281   | COL3A1    | collagen, type III, alpha 1                                                                | 1.42E-05 | Yes | No  | Yes | No  | No  | No  | No |
| 29890  | RBM15B    | RNA binding motif protein 15B                                                              | 1.42E-05 | No  | No  | No  | No  | No  | No  | No |
| 4212   | MEIS2     | Meis homeobox 2                                                                            | 1.42E-05 | Yes | No  | No  | Yes | No  | No  | No |
| 81     | ACTN4     | actinin, alpha 4                                                                           | 1.42E-05 | Yes | No  | No  | Yes | No  | No  | No |
| 346547 | FLJ42291  | hypothetical LOC346547                                                                     | 1.42E-05 | Yes | No  | Yes | No  | No  | No  | No |
| 6354   | CCL7      | chemokine (C-C motif) ligand 7                                                             | 1.43E-05 | No  | No  | No  | Yes | No  | No  | No |
| 8021   | NUP214    | nucleoporin 214kDa                                                                         | 1.43E-05 | No  | No  | Yes | No  | No  | No  | No |
| 5573   | PRKAR1A   | protein kinase, cAMP-dependent, regulatory, type I, alpha (tissue specific extinguisher 1) | 1.44E-05 | No  | No  | Yes | No  | No  | Yes | No |
| 126328 | NDUFA11   | NADH dehydrogenase (ubiquinone) 1 alpha subcomplex, 11, 14.7kDa                            | 1.44E-05 | No  | No  | No  | Yes | No  | Yes | No |
| 27092  | CACNG4    | calcium channel, voltage-dependent, gamma subunit 4                                        | 1.44E-05 | No  | No  | No  | No  | Yes | No  | No |
| 55659  | ZNF416    | zinc finger protein 416                                                                    | 1.45E-05 | No  | No  | No  | No  | No  | No  | No |
| 144809 | C13orf30  | chromosome 13 open reading frame 30                                                        | 1.45E-05 | Yes | No  | No  | Yes | No  | No  | No |
| 51022  | GLRX2     | glutaredoxin 2                                                                             | 1.45E-05 | No  | No  | No  | Yes | No  | No  | No |
| 3630   | INS       | insulin                                                                                    | 1.45E-05 | No  | No  | Yes | No  | No  | No  | No |
| 1317   | SLC31A1   | solute carrier family 31 (copper transporters), member 1                                   | 1.45E-05 | No  | No  | No  | No  | Yes | Yes | No |
| 10206  | TRIM13    | tripartite motif-containing 13                                                             | 1.45E-05 | Yes | No  | Yes | No  | No  | No  | No |
| 25804  | LSM4      | LSM4 homolog, U6 small nuclear RNA associated (S. cerevisiae)                              | 1.45E-05 | No  | No  | Yes | No  | No  | Yes | No |
| 26578  | OSTF1     | osteoclast stimulating factor 1                                                            | 1.45E-05 | Yes | No  | Yes | No  | No  | No  | No |
| 5170   | PDPK1     | 3-phosphoinositide dependent protein kinase-1                                              | 1.46E-05 | No  | No  | No  | Yes | No  | No  | No |
| 55578  | FAM48A    | family with sequence similarity 48, member A                                               | 1.46E-05 | Yes | No  | Yes | No  | No  | No  | No |
| 51320  | MEX3C     | mex-3 homolog C (C. elegans)                                                               | 1.47E-05 | No  | No  | Yes | No  | No  | No  | No |

|        |          |                                                                                                                 |          |     |    |     |     |     |    |    |
|--------|----------|-----------------------------------------------------------------------------------------------------------------|----------|-----|----|-----|-----|-----|----|----|
| 83443  | SF3B5    | splicing factor 3b, subunit 5, 10kDa                                                                            | 1.47E-05 | No  | No | No  | Yes | No  | No | No |
| 65991  | FUNDC2   | FUN14 domain containing 2                                                                                       | 1.47E-05 | No  | No | Yes | No  | No  | No | No |
| 409    | ARRB2    | arrestin, beta 2                                                                                                | 1.47E-05 | Yes | No | Yes | No  | No  | No | No |
| 27043  | PELP1    | proline, glutamate and leucine rich protein 1                                                                   | 1.47E-05 | No  | No | Yes | No  | No  | No | No |
| 23136  | EPB41L3  | erythrocyte membrane protein band 4.1-like 3                                                                    | 1.47E-05 | No  | No | No  | No  | No  | No | No |
| 2069   | ERCC2    | excision repair cross-complementing rodent repair deficiency, complementation group 2 (xeroderma pigmentosum D) | 1.48E-05 | No  | No | Yes | No  | No  | No | No |
| 1001   | CDH3     | cadherin 3, type 1, P-cadherin (placental)                                                                      | 1.48E-05 | Yes | No | No  | Yes | No  | No | No |
| 25778  | RIPK5    | receptor interacting protein kinase 5                                                                           | 1.48E-05 | No  | No | Yes | No  | No  | No | No |
| 80856  | KIAA1715 | KIAA1715                                                                                                        | 1.49E-05 | No  | No | Yes | No  | No  | No | No |
| 390142 | OR5D13   | olfactory receptor, family 5, subfamily D, member 13                                                            | 1.49E-05 | NA  | No | No  | Yes | No  | No | No |
| 657    | BMPRI1A  | bone morphogenetic protein receptor, type IA                                                                    | 1.50E-05 | No  | No | Yes | No  | No  | No | No |
| 23556  | PIGN     | phosphatidylinositol glycan anchor biosynthesis, class N                                                        | 1.50E-05 | No  | No | No  | No  | No  | No | No |
| 162333 | MARCH10  | membrane-associated ring finger (C3HC4) 10                                                                      | 1.50E-05 | No  | No | Yes | No  | No  | No | No |
| 91663  | MYADM    | myeloid-associated differentiation marker                                                                       | 1.50E-05 | Yes | No | No  | No  | Yes | No | No |
| 29094  | HSPC159  | galectin-related protein                                                                                        | 1.51E-05 | No  | No | Yes | No  | No  | No | No |
| 333926 | PPM1J    | protein phosphatase 1J (PP2C domain containing)                                                                 | 1.51E-05 | No  | No | No  | No  | No  | No | No |
| 113828 | FAM83F   | family with sequence similarity 83, member F                                                                    | 1.52E-05 | No  | No | Yes | No  | No  | No | No |
| 92558  | CCDC64   | coiled-coil domain containing 64                                                                                | 1.52E-05 | No  | No | Yes | No  | No  | No | No |
| 51228  | GLTP     | glycolipid transfer protein                                                                                     | 1.52E-05 | No  | No | No  | Yes | No  | No | No |
| 4783   | NFIL3    | nuclear factor, interleukin 3 regulated                                                                         | 1.53E-05 | Yes | No | No  | Yes | No  | No | No |
| 50619  | DEF6     | differentially expressed in FDCP 6 homolog (mouse)                                                              | 1.53E-05 | Yes | No | No  | Yes | No  | No | No |
| 54926  | UBE2R2   | ubiquitin-conjugating enzyme E2R 2                                                                              | 1.53E-05 | No  | No | No  | Yes | No  | No | No |
| 6210   | RPS15A   | ribosomal protein S15a                                                                                          | 1.53E-05 | No  | No | No  | Yes | No  | No | No |
| 5241   | PGR      | progesterone receptor                                                                                           | 1.53E-05 | No  | No | Yes | No  | No  | No | No |
| 10943  | MSL3L1   | male-specific lethal 3-like 1 (Drosophila)                                                                      | 1.53E-05 | Yes | No | Yes | No  | No  | No | No |
| 253558 | LYCAT    | lysocardiolipin acyltransferase                                                                                 | 1.54E-05 | No  | No | No  | Yes | No  | No | No |
| 146664 | MGAT5B   | mannosyl (alpha-1,6)-glycoprotein beta-1,6-N-acetyl-glucosaminyltransferase, isozyme B                          | 1.55E-05 | No  | No | No  | No  | No  | No | No |
| 138883 | OR1N1    | olfactory receptor, family 1, subfamily N, member 1                                                             | 1.55E-05 | NA  | No | Yes | No  | No  | No | No |
| 90007  | MIDN     | midnolin                                                                                                        | 1.55E-05 | Yes | No | Yes | No  | No  | No | No |
| 340075 | ARSI     | arylsulfatase family, member I                                                                                  | 1.56E-05 | NA  | No | No  | Yes | No  | No | No |
| 92799  | SHKBP1   | SHKBP1 binding protein 1                                                                                        | 1.56E-05 | No  | No | Yes | No  | No  | No | No |
| 26256  | CABYR    | calcium binding tyrosine-(Y)-phosphorylation regulated                                                          | 1.57E-05 | Yes | No | Yes | No  | No  | No | No |
| 10057  | ABCC5    | ATP-binding cassette, sub-family C (CFTR/MRP), member 5                                                         | 1.57E-05 | Yes | No | No  | Yes | No  | No | No |
| 56922  | MCCC1    | methylcrotonyl-Coenzyme A carboxylase 1 (alpha)                                                                 | 1.58E-05 | No  | No | No  | Yes | No  | No | No |

|        |          |                                                                          |          |     |     |     |     |     |     |    |
|--------|----------|--------------------------------------------------------------------------|----------|-----|-----|-----|-----|-----|-----|----|
| 286451 | YIPF6    | Yip1 domain family, member 6                                             | 1.58E-05 | No  | No  | No  | Yes | No  | No  | No |
| 6609   | SMPD1    | sphingomyelin phosphodiesterase 1, acid lysosomal                        | 1.58E-05 | Yes | No  | Yes | No  | No  | No  | No |
| 134637 | ADAT2    | adenosine deaminase, tRNA-specific 2, TAD2 homolog (S. cerevisiae)       | 1.59E-05 | Yes | No  | No  | Yes | No  | Yes | No |
| 8504   | PEX3     | peroxisomal biogenesis factor 3                                          | 1.59E-05 | No  | No  | Yes | No  | No  | Yes | No |
| 957    | ENTPD5   | ectonucleoside triphosphate diphosphohydrolase 5                         | 1.59E-05 | No  | No  | Yes | No  | No  | No  | No |
| 9586   | CREB5    | cAMP responsive element binding protein 5                                | 1.60E-05 | No  | No  | No  | No  | No  | No  | No |
| 23385  | NCSTN    | nicastatin                                                               | 1.60E-05 | No  | No  | Yes | No  | No  | No  | No |
| 84632  | AFAP1L2  | actin filament associated protein 1-like 2                               | 1.60E-05 | Yes | No  | Yes | No  | No  | No  | No |
| 9910   | RABGAP1L | RAB GTPase activating protein 1-like                                     | 1.61E-05 | No  | Yes | Yes | No  | No  | No  | No |
| 57092  | PCNP     | PEST proteolytic signal containing nuclear protein                       | 1.61E-05 | No  | No  | Yes | No  | No  | Yes | No |
| 29978  | UBQLN2   | ubiquilin 2                                                              | 1.61E-05 | No  | No  | No  | Yes | No  | No  | No |
| 79677  | SMC6     | structural maintenance of chromosomes 6                                  | 1.61E-05 | Yes | No  | No  | No  | Yes | Yes | No |
| 468    | ATF4     | activating transcription factor 4 (tax-responsive enhancer element B67)  | 1.62E-05 | No  | No  | No  | Yes | No  | Yes | No |
| 57531  | HACE1    | HECT domain and ankyrin repeat containing, E3 ubiquitin protein ligase 1 | 1.62E-05 | Yes | No  | Yes | No  | No  | No  | No |
| 10905  | MAN1A2   | mannosidase, alpha, class 1A, member 2                                   | 1.62E-05 | No  | No  | Yes | No  | No  | Yes | No |
| 940    | CD28     | CD28 molecule                                                            | 1.63E-05 | No  | No  | Yes | No  | No  | No  | No |
| 84937  | ZNRF1    | zinc and ring finger 1                                                   | 1.64E-05 | Yes | No  | Yes | No  | No  | No  | No |
| 23316  | CUX2     | cut-like homeobox 2                                                      | 1.64E-05 | No  | No  | Yes | No  | No  | No  | No |
| 2063   | NR2F6    | nuclear receptor subfamily 2, group F, member 6                          | 1.64E-05 | Yes | No  | Yes | No  | No  | No  | No |
| 8487   | SIP1     | survival of motor neuron protein interacting protein 1                   | 1.64E-05 | No  | No  | Yes | No  | No  | No  | No |
| 55680  | RUFY2    | RUN and FYVE domain containing 2                                         | 1.65E-05 | Yes | No  | No  | Yes | No  | No  | No |
| 8701   | DNAH11   | dynein, axonemal, heavy chain 11                                         | 1.65E-05 | No  | No  | Yes | No  | No  | No  | No |
| 84502  | JPH4     | junctionophilin 4                                                        | 1.65E-05 | Yes | No  | No  | Yes | No  | No  | No |
| 134548 | ANKRD43  | ankyrin repeat domain 43                                                 | 1.65E-05 | No  | No  | No  | No  | No  | No  | No |
| 29935  | RPA4     | replication protein A4, 34kDa                                            | 1.66E-05 | Yes | No  | Yes | No  | No  | No  | No |
| 2935   | GSPT1    | G1 to S phase transition 1                                               | 1.66E-05 | Yes | No  | No  | Yes | No  | No  | No |
| 55178  | RNMTL1   | RNA methyltransferase like 1                                             | 1.66E-05 | No  | No  | Yes | No  | No  | No  | No |
| 43921  | MXRA7    | matrix-remodelling associated 7                                          | 1.66E-05 | Yes | No  | Yes | No  | No  | No  | No |
| 10421  | CD2BP2   | CD2 (cytoplasmic tail) binding protein 2                                 | 1.66E-05 | No  | Yes | No  | Yes | No  | No  | No |
| 8739   | HRK      | harakiri, BCL2 interacting protein (contains only BH3 domain)            | 1.66E-05 | No  | No  | Yes | No  | No  | No  | No |
| 7158   | TP53BP1  | tumor protein p53 binding protein 1                                      | 1.66E-05 | Yes | No  | Yes | No  | No  | No  | No |
| 4130   | MAP1A    | microtubule-associated protein 1A                                        | 1.66E-05 | No  | No  | Yes | No  | No  | No  | No |
| 340719 | NANOS1   | nanos homolog 1 (Drosophila)                                             | 1.67E-05 | No  | No  | Yes | No  | No  | No  | No |
| 5428   | POLG     | polymerase (DNA directed), gamma                                         | 1.67E-05 | No  | No  | Yes | No  | No  | No  | No |

|        |          |                                                                             |          |     |     |     |     |     |     |    |
|--------|----------|-----------------------------------------------------------------------------|----------|-----|-----|-----|-----|-----|-----|----|
| 3676   | ITGA4    | integrin, alpha 4 (antigen CD49D, alpha 4 subunit of VLA-4 receptor)        | 1.68E-05 | Yes | No  | Yes | No  | No  | No  | No |
| 55706  | TMEM48   | transmembrane protein 48                                                    | 1.68E-05 | No  | No  | Yes | No  | No  | No  | No |
| 1298   | COL9A2   | collagen, type IX, alpha 2                                                  | 1.68E-05 | Yes | No  | Yes | No  | No  | No  | No |
| 64421  | DCLRE1C  | DNA cross-link repair 1C (PSO2 homolog, <i>S. cerevisiae</i> )              | 1.68E-05 | No  | No  | Yes | No  | No  | No  | No |
| 56829  | ZC3HAV1  | zinc finger CCCH-type, antiviral 1                                          | 1.68E-05 | Yes | No  | Yes | No  | No  | No  | No |
| 23198  | PSME4    | proteasome (prosome, macropain) activator subunit 4                         | 1.69E-05 | Yes | No  | Yes | No  | No  | No  | No |
| 56181  | FAM54B   | family with sequence similarity 54, member B                                | 1.69E-05 | No  | No  | No  | No  | No  | No  | No |
| 6207   | RPS13    | ribosomal protein S13                                                       | 1.69E-05 | No  | No  | Yes | No  | No  | No  | No |
| 9648   | GCC2     | GRIP and coiled-coil domain containing 2                                    | 1.69E-05 | No  | No  | Yes | No  | No  | No  | No |
| 9134   | CCNE2    | cyclin E2                                                                   | 1.70E-05 | No  | No  | Yes | No  | No  | No  | No |
| 1499   | CTNNB1   | catenin (cadherin-associated protein), beta 1, 88kDa                        | 1.71E-05 | No  | No  | No  | No  | Yes | No  | No |
| 127544 | RNF19B   | ring finger protein 19B                                                     | 1.71E-05 | No  | Yes | Yes | No  | No  | No  | No |
| 23568  | ARL2BP   | ADP-ribosylation factor-like 2 binding protein                              | 1.72E-05 | No  | No  | Yes | No  | No  | No  | No |
| 157848 | NKX6-3   | NK6 homeobox 3                                                              | 1.72E-05 | NA* | Yes | No  | No  | No  | No  | No |
| 92255  | LMBRD2   | LMBR1 domain containing 2                                                   | 1.73E-05 | No  | No  | No  | No  | No  | No  | No |
| 141    | ADPRH    | ADP-ribosylarginine hydrolase                                               | 1.73E-05 | No  | No  | No  | No  | Yes | No  | No |
| 3202   | HOXA5    | homeobox A5                                                                 | 1.73E-05 | No  | No  | Yes | No  | No  | No  | No |
| 26147  | PHF19    | PHD finger protein 19                                                       | 1.73E-05 | No  | No  | Yes | No  | No  | No  | No |
| 5568   | PRKACG   | protein kinase, cAMP-dependent, catalytic, gamma                            | 1.74E-05 | No  | No  | No  | Yes | No  | No  | No |
| 124930 | ANKRD13B | ankyrin repeat domain 13B                                                   | 1.74E-05 | No  | No  | No  | Yes | No  | No  | No |
| 22903  | BTBD3    | BTB (POZ) domain containing 3                                               | 1.74E-05 | Yes | No  | Yes | No  | No  | No  | No |
| 1380   | CR2      | complement component (3d/Epstein Barr virus) receptor 2                     | 1.75E-05 | No  | No  | Yes | No  | No  | No  | No |
| 23112  | TNRC6B   | trinucleotide repeat containing 6B                                          | 1.75E-05 | Yes | No  | No  | No  | No  | No  | No |
| 1186   | CLCN7    | chloride channel 7                                                          | 1.75E-05 | Yes | No  | No  | Yes | No  | No  | No |
| 9936   | CD302    | CD302 molecule                                                              | 1.75E-05 | No  | No  | Yes | No  | No  | No  | No |
| 80776  | B9D2     | B9 protein domain 2                                                         | 1.75E-05 | No  | No  | No  | Yes | No  | No  | No |
| 10936  | GPR75    | G protein-coupled receptor 75                                               | 1.75E-05 | Yes | No  | Yes | No  | No  | No  | No |
| 5423   | POLB     | polymerase (DNA directed), beta                                             | 1.76E-05 | No  | No  | Yes | No  | No  | No  | No |
| 4247   | MGAT2    | mannosyl (alpha-1,6-)-glycoprotein beta-1,2-N-acetylglucosaminyltransferase | 1.77E-05 | No  | No  | No  | No  | Yes | Yes | No |
| 8867   | SYNJ1    | synaptojanin 1                                                              | 1.77E-05 | No  | No  | Yes | No  | No  | No  | No |
| 144423 | GLT1D1   | glycosyltransferase 1 domain containing 1                                   | 1.77E-05 | No  | No  | No  | No  | No  | No  | No |
| 4800   | NFYA     | nuclear transcription factor Y, alpha                                       | 1.78E-05 | No  | No  | No  | Yes | No  | No  | No |
| 51074  | APIP     | APAF1 interacting protein                                                   | 1.78E-05 | No  | No  | No  | No  | Yes | Yes | No |
| 6303   | SAT1     | spermidine/spermine N1-acetyltransferase 1                                  | 1.79E-05 | Yes | No  | No  | Yes | No  | No  | No |



|        |          |                                                                    |          |     |     |     |     |    |     |     |
|--------|----------|--------------------------------------------------------------------|----------|-----|-----|-----|-----|----|-----|-----|
| 55802  | DCP1A    | DCP1 decapping enzyme homolog A (S. cerevisiae)                    | 1.79E-05 | Yes | No  | No  | Yes | No | No  | No  |
| 4014   | LOR      | loricin                                                            | 1.79E-05 | No  | No  | No  | Yes | No | No  | No  |
| 444    | ASPH     | aspartate beta-hydroxylase                                         | 1.79E-05 | No  | Yes | No  | Yes | No | No  | No  |
| 51000  | SLC35B3  | solute carrier family 35, member B3                                | 1.80E-05 | No  | No  | Yes | No  | No | No  | No  |
| 10620  | ARID3B   | AT rich interactive domain 3B (BRIGHT-like)                        | 1.81E-05 | Yes | No  | Yes | No  | No | Yes | No  |
| 11047  | ADRM1    | adhesion regulating molecule 1                                     | 1.81E-05 | No  | No  | No  | Yes | No | No  | No  |
| 8525   | DGKZ     | diacylglycerol kinase, zeta 104kDa                                 | 1.81E-05 | No  | No  | No  | Yes | No | No  | No  |
| 10363  | HMG20A   | high-mobility group 20A                                            | 1.81E-05 | No  | No  | Yes | No  | No | No  | No  |
| 10786  | SLC17A3  | solute carrier family 17 (sodium phosphate), member 3              | 1.82E-05 | No  | No  | No  | Yes | No | No  | No  |
| 5891   | RAGE     | renal tumor antigen                                                | 1.82E-05 | No  | No  | Yes | No  | No | Yes | No  |
| 26036  | ZNF451   | zinc finger protein 451                                            | 1.82E-05 | No  | No  | Yes | No  | No | Yes | Yes |
| 23091  | ZC3H13   | zinc finger CCCH-type containing 13                                | 1.82E-05 | No  | No  | Yes | No  | No | No  | No  |
| 7528   | YY1      | YY1 transcription factor                                           | 1.82E-05 | No  | No  | Yes | No  | No | No  | No  |
| 104    | ADARB1   | adenosine deaminase, RNA-specific, B1 (RED1 homolog rat)           | 1.83E-05 | No  | No  | Yes | No  | No | No  | No  |
| 5627   | PROS1    | protein S (alpha)                                                  | 1.83E-05 | No  | No  | No  | Yes | No | No  | No  |
| 200894 | ARL13B   | ADP-ribosylation factor-like 13B                                   | 1.83E-05 | No  | No  | No  | Yes | No | No  | No  |
| 7226   | TRPM2    | transient receptor potential cation channel, subfamily M, member 2 | 1.84E-05 | Yes | No  | No  | Yes | No | No  | No  |
| 11186  | RASSF1   | Ras association (RalGDS/AF-6) domain family member 1               | 1.85E-05 | Yes | No  | Yes | No  | No | No  | No  |
| 3364   | HUS1     | HUS1 checkpoint homolog (S. pombe)                                 | 1.85E-05 | No  | No  | Yes | No  | No | No  | No  |
| 3324   | HSP90AA2 | heat shock protein 90kDa alpha (cytosolic), class A member 2       | 1.86E-05 | NA  | No  | No  | Yes | No | No  | No  |
| 6470   | SHMT1    | serine hydroxymethyltransferase 1 (soluble)                        | 1.86E-05 | No  | No  | No  | Yes | No | No  | No  |
| 390260 | OR6X1    | olfactory receptor, family 6, subfamily X, member 1                | 1.86E-05 | NA  | No  | Yes | No  | No | No  | No  |
| 3178   | HNRNPA1  | heterogeneous nuclear ribonucleoprotein A1                         | 1.86E-05 | No  | Yes | Yes | No  | No | No  | No  |
| 9031   | BAZ1B    | bromodomain adjacent to zinc finger domain, 1B                     | 1.87E-05 | No  | No  | Yes | No  | No | No  | No  |
| 122953 | JDP2     | Jun dimerization protein 2                                         | 1.87E-05 | No  | No  | No  | No  | No | No  | No  |
| 25801  | GCA      | grancalcin, EF-hand calcium binding protein                        | 1.87E-05 | No  | No  | Yes | No  | No | No  | No  |
| 92745  | SLC38A5  | solute carrier family 38, member 5                                 | 1.88E-05 | Yes | Yes | No  | Yes | No | No  | No  |
| 24140  | FTSJ1    | FtsJ homolog 1 (E. coli)                                           | 1.88E-05 | Yes | No  | No  | Yes | No | No  | No  |
| 6310   | ATXN1    | ataxin 1                                                           | 1.88E-05 | Yes | Yes | Yes | No  | No | Yes | No  |
| 6657   | SOX2     | SRY (sex determining region Y)-box 2                               | 1.88E-05 | No  | No  | Yes | No  | No | No  | No  |
| 85013  | TMEM128  | transmembrane protein 128                                          | 1.88E-05 | No  | No  | Yes | No  | No | No  | No  |
| 140    | ADORA3   | adenosine A3 receptor                                              | 1.89E-05 | Yes | No  | No  | Yes | No | No  | No  |
| 5108   | PCM1     | pericentriolar material 1                                          | 1.90E-05 | Yes | No  | Yes | No  | No | No  | No  |
| 9761   | KIAA0152 | KIAA0152                                                           | 1.90E-05 | No  | No  | No  | Yes | No | No  | No  |

|        |          |                                                                                                 |          |     |     |     |     |     |     |     |
|--------|----------|-------------------------------------------------------------------------------------------------|----------|-----|-----|-----|-----|-----|-----|-----|
| 23764  | MAFF     | v-maf musculoaponeurotic fibrosarcoma oncogene homolog F (avian)                                | 1.90E-05 | Yes | No  | No  | Yes | No  | No  | No  |
| 168455 | FLJ36031 | hypothetical protein FLJ36031                                                                   | 1.90E-05 | No  | No  | Yes | No  | No  | Yes | No  |
| 2588   | GALNS    | galactosamine (N-acetyl)-6-sulfate sulfatase (Morquio syndrome, mucopolysaccharidosis type IVA) | 1.92E-05 | No  | No  | Yes | No  | No  | No  | No  |
| 3992   | FADS1    | fatty acid desaturase 1                                                                         | 1.92E-05 | No  |
| 9087   | TMSB4Y   | thymosin beta 4, Y-linked                                                                       | 1.92E-05 | No  | No  | No  | Yes | No  | No  | No  |
| 4124   | MAN2A1   | mannosidase, alpha, class 2A, member 1                                                          | 1.93E-05 | No  | No  | Yes | No  | No  | No  | No  |
| 57692  | MAGEE1   | melanoma antigen family E, 1                                                                    | 1.93E-05 | No  | No  | No  | Yes | No  | No  | No  |
| 56919  | DHX33    | DEAH (Asp-Glu-Ala-His) box polypeptide 33                                                       | 1.93E-05 | No  | No  | Yes | No  | No  | No  | No  |
| 29765  | TMOD4    | tropomodulin 4 (muscle)                                                                         | 1.93E-05 | Yes | No  | Yes | No  | No  | No  | No  |
| 206358 | SLC36A1  | solute carrier family 36 (proton/amino acid symporter), member 1                                | 1.93E-05 | No  |
| 11167  | FSTL1    | folistatin-like 1                                                                               | 1.94E-05 | No  | No  | Yes | No  | No  | No  | No  |
| 117143 | TADA1L   | transcriptional adaptor 1 (HFI1 homolog, yeast)-like                                            | 1.95E-05 | No  | No  | Yes | No  | No  | No  | No  |
| 200035 | NUDT17   | nudix (nucleoside diphosphate linked moiety X)-type motif 17                                    | 1.96E-05 | No  | Yes | Yes | No  | No  | No  | No  |
| 51555  | PEX5L    | peroxisomal biogenesis factor 5-like                                                            | 1.96E-05 | No  | No  | No  | No  | Yes | No  | No  |
| 285172 | FAM126B  | family with sequence similarity 126, member B                                                   | 1.98E-05 | No  | No  | Yes | No  | No  | No  | No  |
| 2274   | FHL2     | four and a half LIM domains 2                                                                   | 1.99E-05 | No  | No  | Yes | No  | No  | No  | No  |
| 490    | ATP2B1   | ATPase, Ca++ transporting, plasma membrane 1                                                    | 1.99E-05 | No  | No  | Yes | No  | No  | No  | No  |
| 51633  | OTUD6B   | OTU domain containing 6B                                                                        | 1.99E-05 | No  | No  | Yes | No  | No  | No  | No  |
| 3684   | ITGAM    | integrin, alpha M (complement component 3 receptor 3 subunit)                                   | 2.00E-05 | Yes | No  | No  | Yes | No  | No  | No  |
| 85445  | CNTNAP4  | contactin associated protein-like 4                                                             | 2.00E-05 | No  | No  | Yes | No  | No  | No  | No  |
| 11318  | GPR182   | G protein-coupled receptor 182                                                                  | 2.00E-05 | No  | No  | Yes | No  | No  | No  | No  |
| 596    | BCL2     | B-cell CLL/lymphoma 2                                                                           | 2.01E-05 | Yes | Yes | Yes | No  | No  | Yes | Yes |
| 2319   | FLOT2    | flotillin 2                                                                                     | 2.01E-05 | Yes | No  | No  | Yes | No  | No  | No  |
| 55603  | FAM46A   | family with sequence similarity 46, member A                                                    | 2.01E-05 | Yes | No  | No  | Yes | No  | Yes | No  |
| 23262  | HISPPD1  | histidine acid phosphatase domain containing 1                                                  | 2.02E-05 | No  | No  | No  | Yes | No  | No  | No  |
| 54826  | GIN1     | gypsy retrotransposon integrase 1                                                               | 2.02E-05 | No  | No  | No  | Yes | No  | No  | No  |
| 79813  | EHMT1    | euchromatic histone-lysine N-methyltransferase 1                                                | 2.02E-05 | No  | Yes | Yes | No  | No  | No  | No  |
| 25777  | UNC84B   | unc-84 homolog B (C. elegans)                                                                   | 2.02E-05 | Yes | No  | Yes | No  | No  | No  | No  |
| 8877   | SPHK1    | sphingosine kinase 1                                                                            | 2.02E-05 | No  |
| 6869   | TACR1    | tachykinin receptor 1                                                                           | 2.02E-05 | No  | No  | Yes | No  | No  | No  | No  |
| 171586 | ABHD3    | abhydrolase domain containing 3                                                                 | 2.02E-05 | No  | No  | Yes | No  | No  | No  | No  |
| 55054  | ATG16L1  | ATG16 autophagy related 16-like 1 (S. cerevisiae)                                               | 2.02E-05 | No  | No  | Yes | No  | No  | No  | No  |
| 80758  | PRR7     | proline rich 7 (synaptic)                                                                       | 2.02E-05 | No  | No  | No  | Yes | No  | No  | No  |
| 126402 | CDC105   | coiled-coil domain containing 105                                                               | 2.03E-05 | No  | No  | No  | Yes | No  | No  | No  |

|        |          |                                                                                                      |          |     |     |     |     |     |     |    |
|--------|----------|------------------------------------------------------------------------------------------------------|----------|-----|-----|-----|-----|-----|-----|----|
| 91749  | KIAA1919 | KIAA1919                                                                                             | 2.03E-05 | No  | No  | Yes | No  | No  | No  | No |
| 1060   | CENPC1   | centromere protein C 1                                                                               | 2.04E-05 | No  | Yes | Yes | No  | No  | No  | No |
| 89887  | ZNF628   | zinc finger protein 628                                                                              | 2.05E-05 | No  | No  | Yes | No  | No  | No  | No |
| 4125   | MAN2B1   | mannosidase, alpha, class 2B, member 1                                                               | 2.05E-05 | Yes | No  | Yes | No  | No  | No  | No |
| 5251   | PHEX     | phosphate regulating endopeptidase homolog, X-linked (hypophosphatemia, vitamin D resistant rickets) | 2.05E-05 | No  | No  | Yes | No  | No  | No  | No |
| 161003 | STOML3   | stomatrin (EPB72)-like 3                                                                             | 2.05E-05 | No  | No  | No  | Yes | No  | No  | No |
| 342357 | ZKSCAN2  | zinc finger with KRAB and SCAN domains 2                                                             | 2.05E-05 | No  | No  | No  | No  | Yes | No  | No |
| 134430 | WDR36    | WD repeat domain 36                                                                                  | 2.05E-05 | No  | No  | Yes | No  | No  | No  | No |
| 138474 | TAF1L    | TAF1 RNA polymerase II, TATA box binding protein (TBP)-associated factor, 210kDa-like                | 2.05E-05 | No  | No  | No  | Yes | No  | No  | No |
| 145581 | LRFN5    | leucine rich repeat and fibronectin type III domain containing 5                                     | 2.07E-05 | No  | No  | Yes | No  | No  | No  | No |
| 51237  | MGC29506 | hypothetical protein MGC29506                                                                        | 2.07E-05 | No  | No  | No  | No  | No  | No  | No |
| 7443   | VRK1     | vaccinia related kinase 1                                                                            | 2.08E-05 | No  | No  | Yes | No  | No  | Yes | No |
| 9652   | TTC37    | tetratricopeptide repeat domain 37                                                                   | 2.08E-05 | No  | No  | No  | Yes | No  | No  | No |
| 9857   | CEP350   | centrosomal protein 350kDa                                                                           | 2.08E-05 | No  | No  | No  | Yes | No  | No  | No |
| 8729   | GBF1     | golgi-specific brefeldin A resistance factor 1                                                       | 2.08E-05 | No  | No  | Yes | No  | No  | No  | No |
| 54617  | INOC1    | INO80 complex homolog 1 (S. cerevisiae)                                                              | 2.09E-05 | No  | No  | No  | Yes | No  | Yes | No |
| 25942  | SIN3A    | SIN3 homolog A, transcription regulator (yeast)                                                      | 2.09E-05 | Yes | No  | No  | Yes | No  | No  | No |
| 252983 | STXB4    | syntaxin binding protein 4                                                                           | 2.10E-05 | No  | No  | No  | Yes | No  | No  | No |
| 114294 | LACTB    | lactamase, beta                                                                                      | 2.10E-05 | Yes | No  | Yes | No  | No  | No  | No |
| 59344  | ALOXE3   | arachidonate lipoxygenase 3                                                                          | 2.10E-05 | No  | No  | No  | No  | Yes | No  | No |
| 9580   | SOX13    | SRY (sex determining region Y)-box 13                                                                | 2.10E-05 | No  | No  | No  | Yes | No  | No  | No |
| 57697  | FANCM    | Fanconi anemia, complementation group M                                                              | 2.12E-05 | No  | No  | Yes | No  | No  | No  | No |
| 2287   | FKBP3    | FK506 binding protein 3, 25kDa                                                                       | 2.12E-05 | No  | No  | Yes | No  | No  | No  | No |
| 3597   | IL13RA1  | interleukin 13 receptor, alpha 1                                                                     | 2.14E-05 | Yes | No  | Yes | No  | No  | No  | No |
| 83478  | ARHGAP24 | Rho GTPase activating protein 24                                                                     | 2.15E-05 | Yes | No  | No  | Yes | No  | No  | No |
| 56169  | MLZE     | melanoma-derived leucine zipper, extra-nuclear factor                                                | 2.16E-05 | No  | No  | No  | No  | Yes | No  | No |
| 2014   | EMP3     | epithelial membrane protein 3                                                                        | 2.16E-05 | Yes | Yes | No  | Yes | No  | No  | No |
| 8050   | PDHX     | pyruvate dehydrogenase complex, component X                                                          | 2.16E-05 | No  | No  | No  | No  | Yes | Yes | No |
| 4534   | MTM1     | myotubularin 1                                                                                       | 2.17E-05 | No  | No  | Yes | No  | No  | No  | No |
| 5562   | PRKAA1   | protein kinase, AMP-activated, alpha 1 catalytic subunit                                             | 2.17E-05 | Yes | No  | Yes | No  | No  | No  | No |
| 130814 | PQLC3    | PQ loop repeat containing 3                                                                          | 2.17E-05 | Yes | No  | Yes | No  | No  | No  | No |
| 6613   | SUMO2    | SMT3 suppressor of mif two 3 homolog 2 (S. cerevisiae)                                               | 2.17E-05 | No  | No  | No  | Yes | No  | No  | No |
| 23589  | CARHSP1  | calcium regulated heat stable protein 1, 24kDa                                                       | 2.18E-05 | No  | No  | No  | No  | No  | No  | No |
| 1164   | CKS2     | CDC28 protein kinase regulatory subunit 2                                                            | 2.19E-05 | No  | No  | Yes | No  | No  | No  | No |

|       |          |                                                                             |          |     |     |     |     |    |     |     |
|-------|----------|-----------------------------------------------------------------------------|----------|-----|-----|-----|-----|----|-----|-----|
| 9923  | ZBTB40   | zinc finger and BTB domain containing 40                                    | 2.19E-05 | Yes | No  | Yes | No  | No | No  | No  |
| 960   | CD44     | CD44 molecule (Indian blood group)                                          | 2.19E-05 | Yes | Yes | Yes | No  | No | No  | No  |
| 54478 | FAM64A   | family with sequence similarity 64, member A                                | 2.21E-05 | No  | Yes | Yes | No  | No | No  | No  |
| 23746 | AIPL1    | aryl hydrocarbon receptor interacting protein-like 1                        | 2.21E-05 | No  | No  | Yes | No  | No | No  | No  |
| 4953  | ODC1     | ornithine decarboxylase 1                                                   | 2.22E-05 | No  | No  | Yes | No  | No | No  | No  |
| 3269  | HRH1     | histamine receptor H1                                                       | 2.22E-05 | No  | No  | No  | Yes | No | No  | No  |
| 4038  | LRP4     | low density lipoprotein receptor-related protein 4                          | 2.22E-05 | No  | No  | No  | Yes | No | No  | No  |
| 6618  | SNAPC2   | small nuclear RNA activating complex, polypeptide 2, 46kDa                  | 2.23E-05 | No  | No  | No  | No  | No | No  | No  |
| 50848 | F11R     | F11 receptor                                                                | 2.24E-05 | Yes | Yes | Yes | No  | No | No  | No  |
| 9499  | MYOT     | myotilin                                                                    | 2.24E-05 | No  | No  | Yes | No  | No | No  | No  |
| 10648 | SCGB1D1  | secretoglobin, family 1D, member 1                                          | 2.24E-05 | No  | No  | Yes | No  | No | No  | No  |
| 3662  | IRF4     | interferon regulatory factor 4                                              | 2.25E-05 | Yes | No  | No  | Yes | No | Yes | Yes |
| 4898  | NRD1     | nardilysin (N-arginine dibasic convertase)                                  | 2.27E-05 | No  | No  | Yes | No  | No | Yes | No  |
| 57228 | LOC57228 | small trans-membrane and glycosylated protein                               | 2.27E-05 | Yes | No  | Yes | No  | No | Yes | Yes |
| 1958  | EGR1     | early growth response 1                                                     | 2.27E-05 | No  | No  | No  | Yes | No | No  | No  |
| 79690 | GAL3ST4  | galactose-3-O-sulfotransferase 4                                            | 2.27E-05 | No  | No  | No  | Yes | No | No  | No  |
| 9782  | MATR3    | matrin 3                                                                    | 2.27E-05 | No  | No  | No  | Yes | No | No  | No  |
| 22826 | DNAJC8   | DnaJ (Hsp40) homolog, subfamily C, member 8                                 | 2.28E-05 | No  | No  | Yes | No  | No | Yes | No  |
| 93974 | ATPIF1   | ATPase inhibitory factor 1                                                  | 2.28E-05 | No  | No  | Yes | No  | No | No  | No  |
| 9049  | AIP      | aryl hydrocarbon receptor interacting protein                               | 2.28E-05 | No  | No  | Yes | No  | No | No  | No  |
| 92399 | MRRF     | mitochondrial ribosome recycling factor                                     | 2.28E-05 | No  | No  | Yes | No  | No | Yes | No  |
| 55888 | ZNF167   | zinc finger protein 167                                                     | 2.28E-05 | No  | No  | No  | Yes | No | No  | No  |
| 54462 | KIAA1128 | KIAA1128                                                                    | 2.29E-05 | No  | No  | Yes | No  | No | No  | No  |
| 1666  | DECR1    | 2,4-dienoyl CoA reductase 1, mitochondrial                                  | 2.30E-05 | Yes | No  | Yes | No  | No | No  | No  |
| 1613  | DAPK3    | death-associated protein kinase 3                                           | 2.30E-05 | No  | No  | Yes | No  | No | No  | No  |
| 27020 | NPTN     | neuropilin                                                                  | 2.30E-05 | No  | No  | No  | Yes | No | No  | No  |
| 64682 | ANAPC1   | anaphase promoting complex subunit 1                                        | 2.31E-05 | No  | No  | Yes | No  | No | No  | No  |
| 10762 | NUP50    | nucleoporin 50kDa                                                           | 2.31E-05 | No  | No  | No  | Yes | No | No  | No  |
| 64146 | PDF      | peptide deformylase (mitochondrial)                                         | 2.31E-05 | No  | No  | Yes | No  | No | No  | No  |
| 7700  | ZNF141   | zinc finger protein 141                                                     | 2.33E-05 | No  | Yes | Yes | No  | No | No  | No  |
| 323   | APBB2    | amyloid beta (A4) precursor protein-binding, family 8, member 2 (Fe65-like) | 2.33E-05 | No  | No  | Yes | No  | No | No  | No  |
| 10298 | PAK4     | p21 protein (Cdc42/Rac)-activated kinase 4                                  | 2.34E-05 | No  | No  | Yes | No  | No | No  | No  |
| 55758 | RCOR3    | REST corepressor 3                                                          | 2.34E-05 | No  | No  | Yes | No  | No | No  | No  |
| 92270 | LOC92270 | hypothetical protein LOC92270                                               | 2.34E-05 | No  | No  | No  | Yes | No | No  | No  |

|        |          |                                                                     |          |     |     |     |     |     |     |    |
|--------|----------|---------------------------------------------------------------------|----------|-----|-----|-----|-----|-----|-----|----|
| 51075  | TXNDC14  | thioredoxin domain containing 14                                    | 2.34E-05 | Yes | Yes | Yes | No  | No  | Yes | No |
| 219541 | MED19    | mediator complex subunit 19                                         | 2.34E-05 | No  | No  | Yes | No  | No  | No  | No |
| 57721  | KIAA1627 | KIAA1627 protein                                                    | 2.35E-05 | No  | No  | No  | Yes | No  | No  | No |
| 10592  | SMC2     | structural maintenance of chromosomes 2                             | 2.35E-05 | No  | No  | Yes | No  | No  | No  | No |
| 55049  | C19orf60 | chromosome 19 open reading frame 60                                 | 2.35E-05 | Yes | No  | Yes | No  | No  | No  | No |
| 23424  | TDRD7    | tudor domain containing 7                                           | 2.38E-05 | No  | No  | No  | Yes | No  | No  | No |
| 6217   | RPS16    | ribosomal protein S16                                               | 2.39E-05 | No  | No  | Yes | No  | No  | No  | No |
| 6829   | SUPT5H   | suppressor of Ty 5 homolog (S. cerevisiae)                          | 2.39E-05 | No  | No  | Yes | No  | No  | No  | No |
| 272    | AMPD3    | adenosine monophosphate deaminase (isoform E)                       | 2.39E-05 | Yes | No  | No  | Yes | No  | No  | No |
| 57185  | NPAL3    | NIPA-like domain containing 3                                       | 2.39E-05 | Yes | No  | Yes | No  | No  | Yes | No |
| 523    | ATP6V1A  | ATPase, H+ transporting, lysosomal 70kDa, V1 subunit A              | 2.40E-05 | No  | No  | Yes | No  | No  | Yes | No |
| 63901  | FAM111A  | family with sequence similarity 111, member A                       | 2.40E-05 | No  | No  | Yes | No  | No  | No  | No |
| 51347  | TAOK3    | TAO kinase 3                                                        | 2.40E-05 | No  | No  | Yes | No  | No  | No  | No |
| 64426  | SUDS3    | suppressor of defective silencing 3 homolog (S. cerevisiae)         | 2.40E-05 | No  | No  | Yes | No  | No  | No  | No |
| 54535  | CCHCR1   | coiled-coil alpha-helical rod protein 1                             | 2.41E-05 | No  | No  | Yes | No  | No  | Yes | No |
| 6941   | TCF19    | transcription factor 19 (SC1)                                       | 2.41E-05 | No  | No  | Yes | No  | No  | No  | No |
| 119467 | CLRN3    | clarin 3                                                            | 2.42E-05 | No  | No  | No  | Yes | No  | No  | No |
| 27065  | D4S234E  | DNA segment on chromosome 4 (unique) 234 expressed sequence         | 2.42E-05 | No  | No  | No  | No  | No  | No  | No |
| 5890   | RAD51L1  | RAD51-like 1 (S. cerevisiae)                                        | 2.42E-05 | Yes | No  | No  | Yes | No  | No  | No |
| 23503  | ZFYVE26  | zinc finger, FYVE domain containing 26                              | 2.42E-05 | No  | No  | No  | Yes | No  | Yes | No |
| 8061   | FOSL1    | FOS-like antigen 1                                                  | 2.43E-05 | No  | No  | Yes | No  | No  | No  | No |
| 23360  | FNBP4    | formin binding protein 4                                            | 2.43E-05 | Yes | No  | Yes | No  | No  | No  | No |
| 8482   | SEMA7A   | semaphorin 7A, GPI membrane anchor (John Milton Hagen blood group)  | 2.44E-05 | No  | No  | No  | No  | Yes | No  | No |
| 9406   | ZRANB2   | zinc finger, RAN-binding domain containing 2                        | 2.44E-05 | No  | No  | Yes | No  | No  | Yes | No |
| 2099   | ESR1     | estrogen receptor 1                                                 | 2.44E-05 | Yes | No  | Yes | No  | No  | No  | No |
| 51258  | MRPL51   | mitochondrial ribosomal protein L51                                 | 2.45E-05 | No  | No  | No  | Yes | No  | Yes | No |
| 29028  | ATAD2    | ATPase family, AAA domain containing 2                              | 2.45E-05 | No  | No  | Yes | No  | No  | No  | No |
| 8891   | EIF2B3   | eukaryotic translation initiation factor 2B, subunit 3 gamma, 58kDa | 2.45E-05 | No  | No  | Yes | No  | No  | No  | No |
| 382    | ARF6     | ADP-ribosylation factor 6                                           | 2.47E-05 | No  | No  | No  | No  | Yes | Yes | No |
| 7153   | TOP2A    | topoisomerase (DNA) II alpha 170kDa                                 | 2.47E-05 | No  | No  | Yes | No  | No  | No  | No |
| 22796  | COG2     | component of oligomeric golgi complex 2                             | 2.47E-05 | No  | No  | Yes | No  | No  | No  | No |
| 25893  | TRIM58   | tripartite motif-containing 58                                      | 2.47E-05 | No  | No  | Yes | No  | No  | No  | No |
| 4760   | NEUROD1  | neurogenic differentiation 1                                        | 2.47E-05 | No  | No  | Yes | No  | No  | No  | No |
| 116983 | CENTB5   | centaurin, beta 5                                                   | 2.48E-05 | No  | No  | No  | Yes | No  | No  | No |

|        |          |                                                                                   |          |     |     |     |     |     |     |    |
|--------|----------|-----------------------------------------------------------------------------------|----------|-----|-----|-----|-----|-----|-----|----|
| 126789 | PUSL1    | pseudouridylate synthase-like 1                                                   | 2.48E-05 | No  | No  | No  | Yes | No  | No  | No |
| 55565  | ZNF821   | zinc finger protein 821                                                           | 2.48E-05 | No  | Yes | No  | No  | Yes | No  | No |
| 255919 | TMEM188  | transmembrane protein 188                                                         | 2.48E-05 | No  | No  | Yes | No  | No  | No  | No |
| 25945  | PVRL3    | poliovirus receptor-related 3                                                     | 2.49E-05 | No  | No  | Yes | No  | No  | No  | No |
| 11171  | STRAP    | serine/threonine kinase receptor associated protein                               | 2.49E-05 | No  | No  | Yes | No  | No  | No  | No |
| 8909   | P11      | 26 serine protease                                                                | 2.49E-05 | Yes | No  | Yes | No  | No  | No  | No |
| 54885  | TBC1D8B  | TBC1 domain family, member 8B (with GRAM domain)                                  | 2.51E-05 | No  | Yes | No  | No  | Yes | No  | No |
| 54476  | RNF216   | ring finger protein 216                                                           | 2.51E-05 | Yes | No  | No  | No  | Yes | No  | No |
| 4615   | MYD88    | myeloid differentiation primary response gene (88)                                | 2.52E-05 | Yes | No  | No  | Yes | No  | Yes | No |
| 30     | ACAA1    | acetyl-Coenzyme A acyltransferase 1 (peroxisomal 3-oxoacyl-Coenzyme A thiolase)   | 2.52E-05 | No  | No  | No  | Yes | No  | Yes | No |
| 283212 | FLJ33790 | hypothetical protein FLJ33790                                                     | 2.52E-05 | No  | No  | No  | No  | No  | No  | No |
| 55037  | PTCD3    | Pentatricopeptide repeat domain 3                                                 | 2.52E-05 | Yes | No  | Yes | No  | No  | No  | No |
| 9427   | ECEL1    | endothelin converting enzyme-like 1                                               | 2.52E-05 | No  | No  | Yes | No  | No  | No  | No |
| 119694 | OR51F2   | olfactory receptor, family 51, subfamily F, member 2                              | 2.52E-05 | NA  | No  | Yes | No  | No  | No  | No |
| 29895  | MYLPP    | fast skeletal myosin light chain 2                                                | 2.56E-05 | Yes | No  | No  | No  | Yes | No  | No |
| 27023  | FOXB1    | forkhead box B1                                                                   | 2.56E-05 | No  | No  | No  | No  | Yes | No  | No |
| 63920  | LOC63920 | transposon-derived Buster3 transposase-like                                       | 2.56E-05 | No  | No  | Yes | No  | No  | No  | No |
| 51290  | ERGIC2   | ERGIC and golgi 2                                                                 | 2.56E-05 | Yes | No  | Yes | No  | No  | No  | No |
| 6307   | SC4MOL   | sterol-C4-methyl oxidase-like                                                     | 2.57E-05 | No  | No  | Yes | No  | No  | No  | No |
| 163589 | TDRD5    | tudor domain containing 5                                                         | 2.57E-05 | Yes | No  | No  | Yes | No  | No  | No |
| 219557 | MGC26647 | hypothetical protein MGC26647                                                     | 2.57E-05 | Yes | No  | Yes | No  | No  | No  | No |
| 124056 | NOXO1    | NADPH oxidase organizer 1                                                         | 2.57E-05 | No  | No  | No  | No  | No  | No  | No |
| 3954   | LETM1    | leucine zipper-EF-hand containing transmembrane protein 1                         | 2.57E-05 | No  | No  | No  | Yes | No  | No  | No |
| 151473 | SLC16A14 | solute carrier family 16, member 14 (monocarboxylic acid transporter 14)          | 2.57E-05 | No  | No  | Yes | No  | No  | No  | No |
| 10419  | PRMT5    | protein arginine methyltransferase 5                                              | 2.58E-05 | No  | No  | Yes | No  | No  | Yes | No |
| 9204   | ZMYM6    | zinc finger, MYM-type 6                                                           | 2.58E-05 | No  | No  | Yes | No  | No  | No  | No |
| 7913   | DEK      | DEK oncogene (DNA binding)                                                        | 2.58E-05 | No  | No  | Yes | No  | No  | No  | No |
| 347365 | ITIH5L   | inter-alpha (globulin) inhibitor H5-like                                          | 2.58E-05 | No  | No  | Yes | No  | No  | No  | No |
| 10427  | SEC24B   | SEC24 related gene family, member B (S. cerevisiae)                               | 2.58E-05 | No  | No  | Yes | No  | No  | No  | No |
| 9694   | TTC35    | tetratricopeptide repeat domain 35                                                | 2.59E-05 | No  | No  | Yes | No  | No  | Yes | No |
| 80736  | SLC44A4  | solute carrier family 44, member 4                                                | 2.61E-05 | No  | No  | No  | No  | No  | No  | No |
| 2806   | GOT2     | glutamic-oxaloacetic transaminase 2, mitochondrial (aspartate aminotransferase 2) | 2.61E-05 | No  | No  | Yes | No  | No  | No  | No |
| 6938   | TCF12    | transcription factor 12 (HTF4, helix-loop-helix transcription factors 4)          | 2.61E-05 | Yes | No  | No  | No  | Yes | No  | No |
| 4062   | LY6H     | lymphocyte antigen 6 complex, locus H                                             | 2.61E-05 | No  | No  | No  | Yes | No  | No  | No |

|        |          |                                                             |          |     |     |     |     |     |     |     |
|--------|----------|-------------------------------------------------------------|----------|-----|-----|-----|-----|-----|-----|-----|
| 112939 | BTBD14B  | BTB (POZ) domain containing 14B                             | 2.61E-05 | Yes | No  | Yes | No  | No  | No  | No  |
| 9444   | QKI      | quaking homolog, KH domain RNA binding (mouse)              | 2.61E-05 | Yes | Yes | No  | Yes | No  | No  | No  |
| 80305  | TRABD    | TraB domain containing                                      | 2.61E-05 | No  | No  | No  | Yes | No  | No  | No  |
| 6992   | PPP1R11  | protein phosphatase 1, regulatory (inhibitor) subunit 11    | 2.62E-05 | Yes | No  | No  | Yes | No  | Yes | Yes |
| 51227  | PIGP     | phosphatidylinositol glycan anchor biosynthesis, class P    | 2.62E-05 | No  | No  | No  | Yes | No  | No  | No  |
| 4037   | LRP3     | low density lipoprotein receptor-related protein 3          | 2.63E-05 | No  | No  | No  | No  | Yes | No  | No  |
| 84366  | C17orf92 | chromosome 17 open reading frame 92                         | 2.64E-05 | No  | No  | Yes | No  | No  | No  | No  |
| 57661  | KIAA1542 | CTD-binding SR-like protein rA9                             | 2.64E-05 | No  | No  | No  | Yes | No  | No  | No  |
| 3267   | HRB      | HIV-1 Rev binding protein                                   | 2.65E-05 | No  | No  | Yes | No  | No  | No  | No  |
| 1729   | DIAPH1   | diaphanous homolog 1 (Drosophila)                           | 2.65E-05 | Yes | No  | Yes | No  | No  | No  | No  |
| 79780  | CCDC82   | coiled-coil domain containing 82                            | 2.66E-05 | No  | No  | No  | No  | No  | Yes | No  |
| 137902 | PXDNL    | peroxidasin homolog (Drosophila)-like                       | 2.66E-05 | No  | No  | No  | Yes | No  | No  | No  |
| 9100   | USP10    | ubiquitin specific peptidase 10                             | 2.67E-05 | No  | No  | Yes | No  | No  | No  | No  |
| 3834   | KIF25    | kinesin family member 25                                    | 2.67E-05 | No  | No  | Yes | No  | No  | No  | No  |
| 26275  | HIBCH    | 3-hydroxyisobutyryl-Coenzyme A hydrolase                    | 2.67E-05 | No  | No  | Yes | No  | No  | No  | No  |
| 51427  | ZNF107   | zinc finger protein 107                                     | 2.68E-05 | No  | No  | Yes | No  | No  | No  | No  |
| 143662 | MUC15    | mucin 15, cell surface associated                           | 2.69E-05 | Yes | No  | No  | No  | No  | No  | No  |
| 4045   | LSAMP    | limbic system-associated membrane protein                   | 2.69E-05 | Yes | No  | Yes | No  | No  | No  | No  |
| 64173  | SPATA1   | spermatogenesis associated 1                                | 2.69E-05 | No  | No  | Yes | No  | No  | No  | No  |
| 10015  | PDCD6IP  | programmed cell death 6 interacting protein                 | 2.70E-05 | Yes | No  | No  | Yes | No  | No  | No  |
| 65012  | SLC26A10 | solute carrier family 26, member 10                         | 2.70E-05 | No  | No  | No  | No  | Yes | No  | No  |
| 654    | BMP6     | bone morphogenetic protein 6                                | 2.70E-05 | No  | No  | Yes | No  | No  | No  | No  |
| 8875   | VNN2     | vanin 2                                                     | 2.70E-05 | No  | No  | Yes | No  | No  | No  | No  |
| 6845   | VAMP7    | vesicle-associated membrane protein 7                       | 2.72E-05 | No  | No  | No  | Yes | No  | No  | No  |
| 782    | CACNB1   | calcium channel, voltage-dependent, beta 1 subunit          | 2.72E-05 | Yes | No  | No  | No  | No  | No  | No  |
| 6143   | RPL19    | ribosomal protein L19                                       | 2.72E-05 | No  |
| 5507   | PPP1R3C  | protein phosphatase 1, regulatory (inhibitor) subunit 3C    | 2.72E-05 | No  |
| 619189 | SERINC4  | serine incorporator 4                                       | 2.73E-05 | NA  | No  | Yes | No  | No  | No  | No  |
| 84706  | GPT2     | glutamic pyruvate transaminase (alanine aminotransferase) 2 | 2.73E-05 | No  |
| 64839  | FBXL17   | F-box and leucine-rich repeat protein 17                    | 2.73E-05 | Yes | No  | Yes | No  | No  | No  | No  |
| 6235   | RPS29    | ribosomal protein S29                                       | 2.73E-05 | No  | No  | Yes | No  | No  | No  | No  |
| 357    | SHROOM2  | shroom family member 2                                      | 2.74E-05 | No  | No  | Yes | No  | No  | No  | No  |
| 282775 | ORSJ2    | olfactory receptor, family 5, subfamily J, member 2         | 2.74E-05 | No  | No  | Yes | No  | No  | No  | No  |
| 27199  | OXGR1    | oxoglutarate (alpha-ketoglutarate) receptor 1               | 2.75E-05 | No  | No  | Yes | No  | No  | No  | No  |

|        |           |                                                                                              |          |     |     |     |     |     |     |    |    |
|--------|-----------|----------------------------------------------------------------------------------------------|----------|-----|-----|-----|-----|-----|-----|----|----|
| 125170 | SMCR7     | Smith-Magenis syndrome chromosome region, candidate 7                                        | 2.76E-05 | No  | No  | No  | No  | No  | No  | No | No |
| 4148   | MATN3     | matrilin 3                                                                                   | 2.76E-05 | No  | No  | Yes | No  | No  | No  | No | No |
| 79628  | SH3TC2    | SH3 domain and tetratricopeptide repeats 2                                                   | 2.76E-05 | No  | No  | No  | Yes | No  | No  | No | No |
| 9146   | HGS       | hepatocyte growth factor-regulated tyrosine kinase substrate                                 | 2.77E-05 | No  | No  | No  | No  | No  | No  | No | No |
| 85369  | FAM40A    | family with sequence similarity 40, member A                                                 | 2.77E-05 | No  | No  | Yes | No  | No  | No  | No | No |
| 2176   | FANCC     | Fanconi anemia, complementation group C                                                      | 2.77E-05 | No  | No  | Yes | No  | No  | No  | No | No |
| 340441 | A26A1     | ANKRD26-like family A, member 1                                                              | 2.77E-05 | NA  | No  | No  | Yes | No  | No  | No | No |
| 54935  | DUSP23    | dual specificity phosphatase 23                                                              | 2.77E-05 | No  | No  | No  | Yes | No  | No  | No | No |
| 171019 | ADAMTS19  | ADAM metalloproteinase with thrombospondin type 1 motif, 19                                  | 2.78E-05 | Yes | No  | No  | Yes | No  | No  | No | No |
| 79035  | OBFC2B    | oligonucleotide/oligosaccharide-binding fold containing 2B                                   | 2.78E-05 | No  | No  | Yes | No  | No  | No  | No | No |
| 114876 | OSBPL1A   | oxysterol binding protein-like 1A                                                            | 2.78E-05 | Yes | No  | Yes | No  | No  | No  | No | No |
| 1856   | DVL2      | dishevelled, dsh homolog 2 (Drosophila)                                                      | 2.78E-05 | No  | No  | Yes | No  | No  | No  | No | No |
| 79047  | KCTD15    | potassium channel tetramerisation domain containing 15                                       | 2.78E-05 | No  | No  | Yes | No  | No  | No  | No | No |
| 55255  | WDR41     | WD repeat domain 41                                                                          | 2.78E-05 | No  | No  | Yes | No  | No  | No  | No | No |
| 8517   | IKBKG     | inhibitor of kappa light polypeptide gene enhancer in B-cells, kinase gamma                  | 2.79E-05 | No  | No  | No  | No  | Yes | No  | No | No |
| 23461  | ABCA5     | ATP-binding cassette, sub-family A (ABC1), member 5                                          | 2.80E-05 | No  | No  | No  | Yes | No  | No  | No | No |
| 4312   | MMP1      | matrix metalloproteinase 1 (interstitial collagenase)                                        | 2.80E-05 | Yes | No  | Yes | No  | No  | No  | No | No |
| 5019   | OXCT1     | 3-oxoacid CoA transferase 1                                                                  | 2.80E-05 | No  | No  | Yes | No  | No  | No  | No | No |
| 25934  | NIPSNAP3A | nipsnap homolog 3A (C. elegans)                                                              | 2.82E-05 | No  | No  | Yes | No  | No  | Yes | No | No |
| 23404  | EXOSC2    | exosome component 2                                                                          | 2.82E-05 | No  | No  | Yes | No  | No  | No  | No | No |
| 139170 | WDR40B    | WD repeat domain 40B                                                                         | 2.82E-05 | No  | No  | Yes | No  | No  | No  | No | No |
| 692085 | SNORD45C  | small nucleolar RNA, C/D box 45C                                                             | 2.82E-05 | NA  | No  | Yes | No  | No  | No  | No | No |
| 58475  | MS4A7     | membrane-spanning 4-domains, subfamily A, member 7                                           | 2.82E-05 | Yes | Yes | Yes | No  | No  | No  | No | No |
| 3688   | ITGB1     | integrin, beta 1 (fibronectin receptor, beta polypeptide, antigen CD29 includes MDF2, MSK12) | 2.82E-05 | No  | No  | Yes | No  | No  | Yes | No | No |
| 293    | SLC25A6   | solute carrier family 25 (mitochondrial carrier, adenine nucleotide translocator), member 6  | 2.83E-05 | No  | No  | No  | No  | No  | No  | No | No |
| 6785   | ELOVL4    | elongation of very long chain fatty acids (FEN1/Elo2, SUR4/Elo3, yeast)-like 4               | 2.85E-05 | No  | No  | Yes | No  | No  | No  | No | No |
| 3204   | HOXA7     | homeobox A7                                                                                  | 2.85E-05 | No  | No  | Yes | No  | No  | No  | No | No |
| 4067   | LYN       | v-yes-1 Yamaguchi sarcoma viral related oncogene homolog                                     | 2.85E-05 | Yes | No  | No  | Yes | No  | Yes | No | No |
| 25888  | ZNF473    | zinc finger protein 473                                                                      | 2.86E-05 | No  | No  | Yes | No  | No  | Yes | No | No |
| 51231  | VRK3      | vaccinia related kinase 3                                                                    | 2.86E-05 | No  | No  | Yes | No  | No  | Yes | No | No |
| 51458  | RHCG      | Rh family, C glycoprotein                                                                    | 2.86E-05 | No  | No  | No  | Yes | No  | No  | No | No |
| 79939  | SLC35E1   | solute carrier family 35, member E1                                                          | 2.87E-05 | No  | No  | No  | Yes | No  | Yes | No | No |
| 65009  | NDRG4     | NDRG family member 4                                                                         | 2.88E-05 | No  | No  | No  | No  | No  | No  | No | No |
| 84986  | ARHGAP19  | Rho GTPase activating protein 19                                                             | 2.89E-05 | No  | No  | Yes | No  | No  | No  | No | No |



|        |           |                                                                                   |          |     |    |     |     |     |     |    |
|--------|-----------|-----------------------------------------------------------------------------------|----------|-----|----|-----|-----|-----|-----|----|
| 10242  | KCNMB2    | potassium large conductance calcium-activated channel, subfamily M, beta member 2 | 2.89E-05 | Yes | No | No  | Yes | No  | No  | No |
| 55623  | THUMP1    | THUMP domain containing 1                                                         | 2.89E-05 | Yes | No | Yes | No  | No  | No  | No |
| 134492 | NUDCD2    | NudC domain containing 2                                                          | 2.89E-05 | No  | No | No  | Yes | No  | Yes | No |
| 3161   | HMMR      | hyaluronan-mediated motility receptor (RHAMM)                                     | 2.89E-05 | No  | No | No  | Yes | No  | No  | No |
| 5335   | PLCG1     | phospholipase C, gamma 1                                                          | 2.90E-05 | No  | No | No  | No  | Yes | No  | No |
| 54206  | ERRF1     | ERBB receptor feedback inhibitor 1                                                | 2.91E-05 | No  | No | No  | No  | Yes | No  | No |
| 84515  | MCM8      | minichromosome maintenance complex component 8                                    | 2.91E-05 | No  | No | No  | Yes | No  | No  | No |
| 22974  | TPX2      | TPX2, microtubule-associated, homolog (Xenopus laevis)                            | 2.93E-05 | No  | No | Yes | No  | No  | No  | No |
| 9666   | DZIP3     | DAZ interacting protein 3, zinc finger                                            | 2.93E-05 | No  | No | No  | Yes | No  | No  | No |
| 7105   | TSPAN6    | tetraspanin 6                                                                     | 2.94E-05 | Yes | No | Yes | No  | No  | No  | No |
| 80709  | AKNA      | AT-hook transcription factor                                                      | 2.96E-05 | Yes | No | No  | Yes | No  | No  | No |
| 23462  | HEY1      | hairly/enhancer-of-split related with YRPW motif 1                                | 2.96E-05 | Yes | No | Yes | No  | No  | No  | No |
| 8338   | HIST2H2AC | histone cluster 2, H2ac                                                           | 2.96E-05 | NA  | No | Yes | No  | No  | Yes | No |
| 349565 | NMNAT3    | nicotinamide nucleotide adenyltransferase 3                                       | 2.97E-05 | No  | No | Yes | No  | No  | No  | No |
| 11075  | STMN2     | stathmin-like 2                                                                   | 2.98E-05 | No  | No | Yes | No  | No  | No  | No |
| 5303   | PIN4      | protein (peptidylprolyl cis/trans isomerase) NIMA-interacting, 4 (parvulin)       | 2.98E-05 | No  | No | No  | No  | No  | No  | No |
| 79022  | TMEM106C  | transmembrane protein 106C                                                        | 2.98E-05 | No  | No | No  | No  | No  | No  | No |
| 23240  | KIAA0922  | KIAA0922                                                                          | 2.98E-05 | No  | No | Yes | No  | No  | Yes | No |
| 7023   | TFAP4     | transcription factor AP-4 (activating enhancer binding protein 4)                 | 2.98E-05 | No  | No | No  | Yes | No  | No  | No |
| 388962 | BOLA3     | bolA homolog 3 (E. coli)                                                          | 2.99E-05 | No  | No | Yes | No  | No  | No  | No |
| 79029  | SPATA5L1  | spermatogenesis associated 5-like 1                                               | 2.99E-05 | No  | No | No  | Yes | No  | Yes | No |
| 84274  | COQ5      | coenzyme Q5 homolog, methyltransferase (S. cerevisiae)                            | 2.99E-05 | No  | No | No  | Yes | No  | Yes | No |
| 9921   | RNF10     | ring finger protein 10                                                            | 2.99E-05 | No  | No | No  | Yes | No  | No  | No |
| 8087   | FXR1      | fragile X mental retardation, autosomal homolog 1                                 | 2.99E-05 | No  | No | No  | No  | Yes | No  | No |
| 57678  | GPAM      | glycerol-3-phosphate acyltransferase, mitochondrial                               | 3.00E-05 | No  | No | No  | No  | No  | No  | No |
| 79990  | PLEKH13   | pleckstrin homology domain containing, family H (with MYTH4 domain) member 3      | 3.00E-05 | Yes | No | No  | Yes | No  | No  | No |
| 1039   | CDR2      | cerebellar degeneration-related protein 2, 62kDa                                  | 3.00E-05 | No  | No | Yes | No  | No  | No  | No |
| 9472   | AKAP6     | A kinase (PRKA) anchor protein 6                                                  | 3.01E-05 | No  | No | No  | Yes | No  | No  | No |
| 122618 | PLD4      | phospholipase D family, member 4                                                  | 3.02E-05 | Yes | No | No  | Yes | No  | Yes | No |
| 401459 | FLJ46365  | hypothetical LOC401459                                                            | 3.03E-05 | NA  | No | Yes | No  | No  | No  | No |
| 5515   | PPP2CA    | protein phosphatase 2 (formerly 2A), catalytic subunit, alpha isoform             | 3.03E-05 | No  | No | No  | Yes | No  | Yes | No |
| 10227  | MFS10     | major facilitator superfamily domain containing 10                                | 3.03E-05 | No  | No | No  | No  | No  | No  | No |
| 3757   | KCNH2     | potassium voltage-gated channel, subfamily H (eag-related), member 2              | 3.03E-05 | No  | No | No  | Yes | No  | No  | No |
| 51110  | LACTB2    | lactamase, beta 2                                                                 | 3.05E-05 | No  | No | Yes | No  | No  | No  | No |

|        |          |                                                               |          |     |     |     |     |     |     |    |
|--------|----------|---------------------------------------------------------------|----------|-----|-----|-----|-----|-----|-----|----|
| 2824   | GPM6B    | glycoprotein M6B                                              | 3.05E-05 | Yes | No  | No  | No  | Yes | No  | No |
| 7976   | FZD3     | frizzled homolog 3 (Drosophila)                               | 3.07E-05 | No  | No  | Yes | No  | No  | No  | No |
| 5010   | CLDN11   | claudin 11 (oligodendrocyte transmembrane protein)            | 3.07E-05 | No  | No  | Yes | No  | No  | No  | No |
| 1147   | CHUK     | conserved helix-loop-helix ubiquitous kinase                  | 3.08E-05 | No  | No  | No  | Yes | No  | No  | No |
| 9033   | PKD2L1   | polycystic kidney disease 2-like 1                            | 3.09E-05 | No  | No  | No  | Yes | No  | No  | No |
| 51619  | UBE2D4   | ubiquitin-conjugating enzyme E2D 4 (putative)                 | 3.10E-05 | No  | No  | Yes | No  | No  | No  | No |
| 25885  | POLR1A   | polymerase (RNA) I polypeptide A, 194kDa                      | 3.11E-05 | No  | No  | Yes | No  | No  | No  | No |
| 90273  | CEACAM21 | carcinoembryonic antigen-related cell adhesion molecule 21    | 3.11E-05 | Yes | No  | No  | Yes | No  | No  | No |
| 23314  | SATB2    | SATB homeobox 2                                               | 3.12E-05 | Yes | No  | No  | Yes | No  | No  | No |
| 4200   | ME2      | malic enzyme 2, NAD(+)-dependent, mitochondrial               | 3.12E-05 | Yes | No  | Yes | No  | No  | Yes | No |
| 401137 | C4orf40  | chromosome 4 open reading frame 40                            | 3.14E-05 | NA  | No  | Yes | No  | No  | No  | No |
| 79717  | PPCS     | phosphopantothenoylcysteine synthetase                        | 3.15E-05 | No  | No  | No  | Yes | No  | Yes | No |
| 57097  | PARP11   | poly (ADP-ribose) polymerase family, member 11                | 3.15E-05 | No  | No  | Yes | No  | No  | No  | No |
| 153222 | C5orf41  | chromosome 5 open reading frame 41                            | 3.15E-05 | Yes | No  | Yes | No  | No  | No  | No |
| 1390   | CREM     | cAMP responsive element modulator                             | 3.15E-05 | No  | No  | No  | No  | No  | No  | No |
| 4126   | MANBA    | mannosidase, beta A, lysosomal                                | 3.16E-05 | No  | No  | Yes | No  | No  | No  | No |
| 3773   | KCNJ16   | potassium inwardly-rectifying channel, subfamily J, member 16 | 3.16E-05 | No  | No  | Yes | No  | No  | No  | No |
| 23287  | AGTPBP1  | ATP/GTP binding protein 1                                     | 3.17E-05 | No  | No  | Yes | No  | No  | No  | No |
| 163126 | EID2     | EP300 interacting inhibitor of differentiation 2              | 3.17E-05 | No  | No  | Yes | No  | No  | No  | No |
| 25839  | COG4     | component of oligomeric golgi complex 4                       | 3.17E-05 | No  | No  | Yes | No  | No  | No  | No |
| 6898   | TAT      | tyrosine aminotransferase                                     | 3.20E-05 | No  | No  | Yes | No  | No  | No  | No |
| 51199  | NIN      | ninein (GSK3B interacting protein)                            | 3.20E-05 | No  | Yes | Yes | No  | No  | No  | No |
| 163590 | TOR1AIP2 | torsin A interacting protein 2                                | 3.21E-05 | Yes | No  | Yes | No  | No  | No  | No |
| 90925  | LOC90925 | hypothetical protein LOC90925                                 | 3.21E-05 | No  | Yes | No  | Yes | No  | No  | No |
| 53407  | STX18    | syntaxin 18                                                   | 3.21E-05 | No  | No  | No  | No  | Yes | No  | No |
| 646    | BNC1     | basonuclin 1                                                  | 3.22E-05 | No  | No  | No  | No  | No  | No  | No |
| 6720   | SREBF1   | sterol regulatory element binding transcription factor 1      | 3.22E-05 | No  | No  | No  | Yes | No  | No  | No |
| 51192  | CKLF     | chemokine-like factor                                         | 3.24E-05 | No  | No  | Yes | No  | No  | Yes | No |
| 51155  | HN1      | hematological and neurological expressed 1                    | 3.24E-05 | No  | No  | No  | No  | Yes | No  | No |
| 2140   | EYA3     | eyes absent homolog 3 (Drosophila)                            | 3.25E-05 | No  | No  | Yes | No  | No  | No  | No |
| 5140   | PDE3B    | phosphodiesterase 3B, cGMP-inhibited                          | 3.26E-05 | Yes | No  | Yes | No  | No  | No  | No |
| 387032 | ZKSCAN4  | zinc finger with KRAB and SCAN domains 4                      | 3.26E-05 | No  | No  | No  | Yes | No  | No  | No |
| 80139  | ZNF703   | zinc finger protein 703                                       | 3.27E-05 | Yes | No  | Yes | No  | No  | No  | No |
| 11124  | FAF1     | Fas (TNFRSF6) associated factor 1                             | 3.28E-05 | No  | No  | Yes | No  | No  | No  | No |

|        |           |                                                                                   |          |     |     |     |     |    |     |    |
|--------|-----------|-----------------------------------------------------------------------------------|----------|-----|-----|-----|-----|----|-----|----|
| 26156  | RSL1D1    | ribosomal L1 domain containing 1                                                  | 3.29E-05 | Yes | Yes | No  | Yes | No | No  | No |
| 51379  | CRLF3     | cytokine receptor-like factor 3                                                   | 3.31E-05 | No  | No  | Yes | No  | No | No  | No |
| 5607   | MAP2K5    | mitogen-activated protein kinase kinase 5                                         | 3.31E-05 | Yes | No  | Yes | No  | No | Yes | No |
| 120103 | SLC36A4   | solute carrier family 36 (proton/amino acid symporter), member 4                  | 3.32E-05 | No  | No  | Yes | No  | No | No  | No |
| 59082  | ICEBERG   | ICEBERG caspase-1 inhibitor                                                       | 3.32E-05 | No  | No  | Yes | No  | No | No  | No |
| 7402   | UTRN      | utrophin                                                                          | 3.33E-05 | Yes | No  | No  | Yes | No | No  | No |
| 54874  | FBNP1L    | formin binding protein 1-like                                                     | 3.33E-05 | Yes | No  | Yes | No  | No | No  | No |
| 440    | ASNS      | asparagine synthetase                                                             | 3.34E-05 | No  | No  | Yes | No  | No | No  | No |
| 85014  | TMEM141   | transmembrane protein 141                                                         | 3.34E-05 | No  | No  | No  | Yes | No | No  | No |
| 23389  | MED13L    | mediator complex subunit 13-like                                                  | 3.35E-05 | Yes | No  | No  | No  | No | No  | No |
| 29799  | YPPEL1    | yippee-like 1 (Drosophila)                                                        | 3.35E-05 | Yes | No  | Yes | No  | No | No  | No |
| 117145 | THEM4     | thioesterase superfamily member 4                                                 | 3.36E-05 | No  | No  | Yes | No  | No | No  | No |
| 84908  | FAM136A   | family with sequence similarity 136, member A                                     | 3.36E-05 | No  | No  | Yes | No  | No | No  | No |
| 85004  | RERG      | RAS-like, estrogen-regulated, growth inhibitor                                    | 3.36E-05 | Yes | No  | No  | Yes | No | No  | No |
| 10460  | TACC3     | transforming, acidic coiled-coil containing protein 3                             | 3.36E-05 | No  | No  | No  | Yes | No | No  | No |
| 3097   | HIVEP2    | human immunodeficiency virus type 1 enhancer binding protein 2                    | 3.38E-05 | No  | No  | Yes | No  | No | No  | No |
| 5948   | RBP2      | retinol binding protein 2, cellular                                               | 3.40E-05 | No  | No  | No  | Yes | No | No  | No |
| 266977 | GPR110    | G protein-coupled receptor 110                                                    | 3.40E-05 | No  | No  | No  | Yes | No | No  | No |
| 221442 | LOC221442 | hypothetical LOC221442                                                            | 3.41E-05 | Yes | No  | Yes | No  | No | No  | No |
| 6950   | TCP1      | t-complex 1                                                                       | 3.42E-05 | No  | Yes | Yes | No  | No | Yes | No |
| 29074  | MRPL18    | mitochondrial ribosomal protein L18                                               | 3.42E-05 | No  | No  | Yes | No  | No | Yes | No |
| 2962   | GTF2F1    | general transcription factor IIF, polypeptide 1, 74kDa                            | 3.45E-05 | No  | No  | No  | Yes | No | No  | No |
| 163732 | CITED4    | Cbp/p300-interacting transactivator, with Glu/Asp-rich carboxy-terminal domain, 4 | 3.45E-05 | No  | No  | No  | Yes | No | Yes | No |
| 79665  | DHX40     | DEAH (Asp-Glu-Ala-His) box polypeptide 40                                         | 3.45E-05 | No  | Yes | No  | Yes | No | No  | No |
| 144360 | FLJ32894  | hypothetical protein LOC144360                                                    | 3.45E-05 | No  | No  | No  | No  | No | No  | No |
| 23408  | SIRT5     | sirtuin (silent mating type information regulation 2 homolog) 5 (S. cerevisiae)   | 3.45E-05 | Yes | No  | Yes | No  | No | No  | No |
| 8320   | EOMES     | eomesodermin homolog (Xenopus laevis)                                             | 3.45E-05 | Yes | No  | Yes | No  | No | No  | No |
| 57510  | XPO5      | exportin 5                                                                        | 3.46E-05 | Yes | No  | Yes | No  | No | Yes | No |
| 390155 | OR5T1     | olfactory receptor, family 5, subfamily T, member 1                               | 3.46E-05 | NA  | No  | Yes | No  | No | No  | No |
| 1434   | CSE1L     | CSE1 chromosome segregation 1-like (yeast)                                        | 3.46E-05 | No  | No  | No  | Yes | No | No  | No |
| 85444  | LRRCC1    | leucine rich repeat and coiled-coil domain containing 1                           | 3.46E-05 | No  | No  | No  | Yes | No | No  | No |
| 10159  | ATP6AP2   | ATPase, H+ transporting, lysosomal accessory protein 2                            | 3.46E-05 | No  | No  | Yes | No  | No | No  | No |
| 5203   | PFDN4     | prefoldin subunit 4                                                               | 3.47E-05 | No  | No  | Yes | No  | No | No  | No |
| 23620  | NTSR2     | neurotensin receptor 2                                                            | 3.47E-05 | No  | No  | Yes | No  | No | No  | No |

|        |          |                                                                             |          |     |     |     |     |    |     |    |
|--------|----------|-----------------------------------------------------------------------------|----------|-----|-----|-----|-----|----|-----|----|
| 151246 | SGOL2    | shugoshin-like 2 (S. pombe)                                                 | 3.48E-05 | No  | No  | Yes | No  | No | No  | No |
| 9813   | KIAA0494 | KIAA0494                                                                    | 3.48E-05 | Yes | No  | Yes | No  | No | No  | No |
| 80006  | C5orf44  | chromosome 5 open reading frame 44                                          | 3.48E-05 | No  | No  | No  | Yes | No | Yes | No |
| 3196   | TLX2     | T-cell leukemia homeobox 2                                                  | 3.48E-05 | No  | No  | No  | Yes | No | No  | No |
| 55142  | CEP27    | centrosomal protein 27kDa                                                   | 3.49E-05 | No  | No  | Yes | No  | No | No  | No |
| 80380  | PDCD1LG2 | programmed cell death 1 ligand 2                                            | 3.50E-05 | Yes | No  | No  | No  | No | No  | No |
| 10081  | PDCD7    | programmed cell death 7                                                     | 3.50E-05 | No  | No  | No  | No  | No | No  | No |
| 51106  | TFB1M    | transcription factor B1, mitochondrial                                      | 3.52E-05 | NA  | No  | Yes | No  | No | No  | No |
| 5048   | PAFAH1B1 | platelet-activating factor acetylhydrolase, isoform Ib, alpha subunit 45kDa | 3.52E-05 | No  | No  | No  | Yes | No | No  | No |
| 125950 | RAVER1   | ribonucleoprotein, PTB-binding 1                                            | 3.53E-05 | No  | No  | No  | Yes | No | No  | No |
| 64163  | IFRG15   | interferon responsive gene 15                                               | 3.53E-05 | No  | Yes | Yes | No  | No | No  | No |
| 51338  | MS4A4A   | membrane-spanning 4-domains, subfamily A, member 4                          | 3.54E-05 | Yes | No  | No  | Yes | No | No  | No |
| 7108   | TM7SF2   | transmembrane 7 superfamily member 2                                        | 3.54E-05 | No  | No  | No  | Yes | No | No  | No |
| 83940  | TATDN1   | TatD DNase domain containing 1                                              | 3.56E-05 | No  | No  | Yes | No  | No | No  | No |
| 84687  | PPP1R9B  | protein phosphatase 1, regulatory (inhibitor) subunit 9B                    | 3.58E-05 | Yes | No  | No  | Yes | No | No  | No |
| 9320   | TRIP12   | thyroid hormone receptor interactor 12                                      | 3.58E-05 | Yes | No  | No  | Yes | No | No  | No |
| 130888 | FBXO36   | F-box protein 36                                                            | 3.58E-05 | No  | No  | No  | Yes | No | No  | No |
| 11215  | AKAP11   | A kinase (PRKA) anchor protein 11                                           | 3.58E-05 | Yes | No  | Yes | No  | No | Yes | No |
| 79147  | FKRP     | fukutin related protein                                                     | 3.59E-05 | No  | No  | No  | No  | No | No  | No |
| 83538  | TTC25    | tetratricopeptide repeat domain 25                                          | 3.59E-05 | No  | No  | No  | Yes | No | No  | No |
| 219402 | MTIF3    | mitochondrial translational initiation factor 3                             | 3.59E-05 | No  | No  | No  | Yes | No | No  | No |
| 256364 | EML3     | echinoderm microtubule associated protein like 3                            | 3.59E-05 | Yes | No  | No  | No  | No | No  | No |
| 6094   | ROM1     | retinal outer segment membrane protein 1                                    | 3.59E-05 | No  | No  | No  | No  | No | No  | No |
| 9967   | THRAP3   | thyroid hormone receptor associated protein 3                               | 3.59E-05 | No  | No  | No  | Yes | No | No  | No |
| 81790  | RNF170   | ring finger protein 170                                                     | 3.59E-05 | No  | No  | Yes | No  | No | No  | No |
| 80778  | ZNF34    | zinc finger protein 34                                                      | 3.60E-05 | No  | No  | No  | Yes | No | No  | No |
| 4336   | MOBP     | myelin-associated oligodendrocyte basic protein                             | 3.60E-05 | No  | No  | No  | Yes | No | No  | No |
| 353116 | RILPL1   | Rab interacting lysosomal protein-like 1                                    | 3.61E-05 | No  | No  | No  | Yes | No | No  | No |
| 132949 | AASDH    | aminoadipate-semialdehyde dehydrogenase                                     | 3.62E-05 | No  | No  | Yes | No  | No | No  | No |
| 55106  | SLFN12   | schlafen family member 12                                                   | 3.62E-05 | Yes | No  | Yes | No  | No | No  | No |
| 4886   | NPY1R    | neuropeptide Y receptor Y1                                                  | 3.62E-05 | No  | No  | No  | Yes | No | No  | No |
| 10009  | ZBTB33   | zinc finger and BTB domain containing 33                                    | 3.62E-05 | No  | Yes | Yes | No  | No | No  | No |
| 744    | MPPED2   | metallophosphoesterase domain containing 2                                  | 3.62E-05 | Yes | No  | Yes | No  | No | No  | No |
| 4115   | MAGEB4   | melanoma antigen family B, 4                                                | 3.62E-05 | No  | No  | Yes | No  | No | No  | No |

|        |          |                                                             |          |     |     |     |     |     |     |     |
|--------|----------|-------------------------------------------------------------|----------|-----|-----|-----|-----|-----|-----|-----|
| 5438   | POLR2I   | polymerase (RNA) II (DNA directed) polypeptide I, 14.5kDa   | 3.64E-05 | No  | No  | Yes | No  | No  | No  | No  |
| 51702  | PADI3    | peptidyl arginine deiminase, type III                       | 3.64E-05 | No  | No  | No  | Yes | No  | No  | No  |
| 23023  | TMCC1    | transmembrane and coiled-coil domain family 1               | 3.64E-05 | No  | Yes | Yes | No  | No  | No  | No  |
| 6786   | STIM1    | stromal interaction molecule 1                              | 3.64E-05 | Yes | No  | No  | No  | Yes | Yes | Yes |
| 2890   | GRIA1    | glutamate receptor, ionotropic, AMPA 1                      | 3.64E-05 | Yes | No  | Yes | No  | No  | No  | No  |
| 56667  | MUC13    | mucin 13, cell surface associated                           | 3.64E-05 | No  | No  | No  | No  | Yes | No  | No  |
| 94081  | SFXN1    | sideroflexin 1                                              | 3.65E-05 | No  | No  | Yes | No  | No  | No  | No  |
| 221687 | RNF182   | ring finger protein 182                                     | 3.66E-05 | No  | No  | No  | Yes | No  | No  | No  |
| 5366   | PMAIP1   | phorbol-12-myristate-13-acetate-induced protein 1           | 3.66E-05 | No  | No  | Yes | No  | No  | No  | No  |
| 10003  | NALAD2   | N-acetylated alpha-linked acidic dipeptidase 2              | 3.66E-05 | Yes | No  | Yes | No  | No  | No  | No  |
| 140735 | DYNLL2   | dynein, light chain, LC8-type 2                             | 3.66E-05 | No  | No  | No  | Yes | No  | No  | No  |
| 119765 | OR4B1    | olfactory receptor, family 4, subfamily B, member 1         | 3.67E-05 | NA  | No  | Yes | No  | No  | No  | No  |
| 57393  | TMEM27   | transmembrane protein 27                                    | 3.67E-05 | No  | No  | Yes | No  | No  | No  | No  |
| 4071   | TM4SF1   | transmembrane 4 L six family member 1                       | 3.67E-05 | No  | No  | Yes | No  | No  | No  | No  |
| 64841  | GNPNAT1  | glucosamine-phosphate N-acetyltransferase 1                 | 3.67E-05 | No  | No  | Yes | No  | No  | No  | No  |
| 51398  | C19orf56 | chromosome 19 open reading frame 56                         | 3.69E-05 | No  | No  | No  | Yes | No  | No  | No  |
| 92259  | MRPS36   | mitochondrial ribosomal protein S36                         | 3.69E-05 | No  | No  | Yes | No  | No  | No  | No  |
| 2766   | GMPT     | guanosine monophosphate reductase                           | 3.70E-05 | No  | No  | Yes | No  | No  | No  | No  |
| 8767   | RIPK2    | receptor-interacting serine-threonine kinase 2              | 3.70E-05 | No  | No  | Yes | No  | No  | No  | No  |
| 54529  | ASNSD1   | asparagine synthetase domain containing 1                   | 3.70E-05 | No  | No  | Yes | No  | No  | No  | No  |
| 5018   | OXA1L    | oxidase (cytochrome c) assembly 1-like                      | 3.70E-05 | No  | No  | No  | Yes | No  | No  | No  |
| 2800   | GOLGA1   | golgi autoantigen, golgin subfamily a, 1                    | 3.71E-05 | Yes | No  | Yes | No  | No  | No  | No  |
| 9587   | MAD2L1BP | MAD2L1 binding protein                                      | 3.71E-05 | No  | No  | No  | No  | No  | Yes | No  |
| 56853  | BRUNOL4  | bruno-like 4, RNA binding protein (Drosophila)              | 3.71E-05 | No  | No  | No  | Yes | No  | No  | No  |
| 9310   | ZNF235   | zinc finger protein 235                                     | 3.72E-05 | Yes | No  | No  | Yes | No  | No  | No  |
| 3434   | IFIT1    | interferon-induced protein with tetratricopeptide repeats 1 | 3.73E-05 | Yes | Yes | Yes | No  | No  | No  | No  |
| 6895   | TARBP2   | TAR (HIV-1) RNA binding protein 2                           | 3.76E-05 | No  | No  | No  | No  | Yes | No  | No  |
| 55531  | ELMOD1   | ELMO/CEP-12 domain containing 1                             | 3.78E-05 | No  | No  | Yes | No  | No  | No  | No  |
| 1649   | DDIT3    | DNA-damage-inducible transcript 3                           | 3.79E-05 | No  | No  | Yes | No  | No  | Yes | Yes |
| 114785 | MBD6     | methyl-CpG binding domain protein 6                         | 3.79E-05 | No  | No  | Yes | No  | No  | Yes | No  |
| 10142  | AKAP9    | A kinase (PRKA) anchor protein (yo8ao) 9                    | 3.82E-05 | Yes | No  | Yes | No  | No  | No  | No  |
| 54957  | TXNL4B   | thioredoxin-like 4B                                         | 3.83E-05 | No  | No  | Yes | No  | No  | No  | No  |
| 253143 | C22orf30 | chromosome 22 open reading frame 30                         | 3.83E-05 | No  | Yes | No  | Yes | No  | No  | No  |
| 199720 | GGN      | gametogenetin                                               | 3.84E-05 | No  | No  | No  | Yes | No  | No  | No  |

|        |           |                                                                 |          |     |     |     |     |     |     |    |
|--------|-----------|-----------------------------------------------------------------|----------|-----|-----|-----|-----|-----|-----|----|
| 81559  | TRIM11    | tripartite motif-containing 11                                  | 3.84E-05 | No  | No  | No  | Yes | No  | No  | No |
| 2178   | FANCE     | Fanconi anemia, complementation group E                         | 3.84E-05 | No  | No  | Yes | No  | No  | No  | No |
| 26046  | ZNF294    | zinc finger protein 294                                         | 3.85E-05 | No  | No  | Yes | No  | No  | No  | No |
| 7101   | NR2E1     | nuclear receptor subfamily 2, group E, member 1                 | 3.86E-05 | Yes | No  | No  | Yes | No  | No  | No |
| 10892  | MALT1     | mucosa associated lymphoid tissue lymphoma translocation gene 1 | 3.87E-05 | No  | No  | Yes | No  | No  | Yes | No |
| 2572   | GAD2      | glutamate decarboxylase 2 (pancreatic islets and brain, 65kDa)  | 3.88E-05 | No  | No  | Yes | No  | No  | No  | No |
| 7342   | UBP1      | upstream binding protein 1 (LBP-1a)                             | 3.89E-05 | No  | No  | Yes | No  | No  | No  | No |
| 3191   | HNRNPL    | heterogeneous nuclear ribonucleoprotein L                       | 3.89E-05 | No  | No  | Yes | No  | No  | No  | No |
| 1791   | DNTT      | deoxynucleotidyltransferase, terminal                           | 3.89E-05 | No  | No  | No  | Yes | No  | No  | No |
| 26112  | CDC69     | coiled-coil domain containing 69                                | 3.89E-05 | No  | No  | No  | No  | No  | No  | No |
| 4659   | PPP1R12A  | protein phosphatase 1, regulatory (inhibitor) subunit 12A       | 3.89E-05 | No  | No  | No  | Yes | No  | Yes | No |
| 9244   | CRLF1     | cytokine receptor-like factor 1                                 | 3.91E-05 | No  | No  | Yes | No  | No  | No  | No |
| 653140 | FLJ30851  | hypothetical LOC653140                                          | 3.91E-05 | No  | No  | No  | No  | No  | No  | No |
| 375189 | PFN4      | profilin family, member 4                                       | 3.91E-05 | NA  | No  | No  | No  | No  | No  | No |
| 5982   | RFC2      | replication factor C (activator 1) 2, 40kDa                     | 3.91E-05 | No  | No  | Yes | No  | No  | Yes | No |
| 23190  | UBXD2     | UBX domain containing 2                                         | 3.92E-05 | No  | No  | Yes | No  | No  | No  | No |
| 27250  | PDCD4     | programmed cell death 4 (neoplastic transformation inhibitor)   | 3.93E-05 | Yes | Yes | Yes | No  | No  | No  | No |
| 79012  | CAMKV     | CaM kinase-like vesicle-associated                              | 3.93E-05 | No  | No  | Yes | No  | No  | No  | No |
| 4217   | MAP3K5    | mitogen-activated protein kinase kinase kinase 5                | 3.94E-05 | Yes | Yes | Yes | No  | No  | No  | No |
| 820    | CAMP      | cathelicidin antimicrobial peptide                              | 3.95E-05 | No  | No  | Yes | No  | No  | No  | No |
| 3458   | IFNG      | interferon, gamma                                               | 3.96E-05 | No  | No  | Yes | No  | No  | No  | No |
| 55825  | PECR      | peroxisomal trans-2-enoyl-CoA reductase                         | 3.96E-05 | Yes | No  | Yes | No  | No  | No  | No |
| 55299  | BXDC2     | brix domain containing 2                                        | 3.97E-05 | No  | No  | No  | Yes | No  | No  | No |
| 3420   | IDH3B     | isocitrate dehydrogenase 3 (NAD+) beta                          | 3.97E-05 | No  | No  | Yes | No  | No  | Yes | No |
| 5168   | ENPP2     | ectonucleotide pyrophosphatase/phosphodiesterase 2 (autotaxin)  | 3.97E-05 | No  | No  | Yes | No  | No  | No  | No |
| 6224   | RPS20     | ribosomal protein S20                                           | 3.99E-05 | Yes | No  | Yes | No  | No  | No  | No |
| 27122  | DKK3      | dickkopf homolog 3 (Xenopus laevis)                             | 3.99E-05 | Yes | No  | No  | No  | Yes | No  | No |
| 348378 | FAM159A   | family with sequence similarity 159, member A                   | 4.01E-05 | Yes | No  | No  | No  | No  | No  | No |
| 3925   | STMN1     | stathmin 1/ncoprotein 18                                        | 4.01E-05 | No  | No  | No  | No  | No  | No  | No |
| 1244   | ABCC2     | ATP-binding cassette, sub-family C (CFTR/MRP), member 2         | 4.01E-05 | No  | No  | Yes | No  | No  | No  | No |
| 10637  | LEFTY1    | left-right determination factor 1                               | 4.02E-05 | No  | No  | No  | No  | Yes | No  | No |
| 51176  | LEF1      | lymphoid enhancer-binding factor 1                              | 4.04E-05 | Yes | No  | Yes | No  | No  | No  | No |
| 387856 | LOC387856 | similar to expressed sequence A1836003                          | 4.06E-05 | No  | No  | No  | Yes | No  | No  | No |
| 5020   | OXT       | oxytocin, prepro- (neurophysin I)                               | 4.06E-05 | No  | No  | No  | No  | No  | No  | No |

|        |         |                                                                                       |          |     |     |     |     |     |     |     |
|--------|---------|---------------------------------------------------------------------------------------|----------|-----|-----|-----|-----|-----|-----|-----|
| 93183  | PIGM    | phosphatidylinositol glycan anchor biosynthesis, class M                              | 4.06E-05 | No  | No  | No  | Yes | No  | No  | No  |
| 10349  | ABCA10  | ATP-binding cassette, sub-family A (ABC1), member 10                                  | 4.07E-05 | No  | No  | Yes | No  | No  | No  | No  |
| 121551 | BTBD11  | BTB (POZ) domain containing 11                                                        | 4.07E-05 | No  | No  | No  | Yes | No  | No  | No  |
| 55795  | PCID2   | PCI domain containing 2                                                               | 4.07E-05 | No  | No  | Yes | No  | No  | No  | No  |
| 1500   | CTNND1  | catenin (cadherin-associated protein), delta 1                                        | 4.07E-05 | Yes | No  | No  | Yes | No  | Yes | Yes |
| 2006   | ELN     | elastin (supravalvular aortic stenosis, Williams-Beuren syndrome)                     | 4.07E-05 | No  | No  | No  | Yes | No  | No  | No  |
| 2752   | GLUL    | glutamate-aminonia ligase (glutamine synthetase)                                      | 4.08E-05 | No  | No  | No  | Yes | No  | No  | No  |
| 9903   | KLHL21  | kelch-like 21 (Drosophila)                                                            | 4.08E-05 | Yes | No  | No  | Yes | No  | No  | No  |
| 148479 | PHF13   | PHD finger protein 13                                                                 | 4.08E-05 | No  | No  | Yes | No  | No  | No  | No  |
| 10653  | SPINT2  | serine peptidase inhibitor, Kunitz type, 2                                            | 4.09E-05 | No  |
| 2072   | ERCC4   | excision repair cross-complementing rodent repair deficiency, complementation group 4 | 4.10E-05 | No  | No  | Yes | No  | No  | No  | No  |
| 687    | KLF9    | Kruppel-like factor 9                                                                 | 4.10E-05 | Yes | No  | Yes | No  | No  | No  | No  |
| 3708   | ITPR1   | inositol 1,4,5-triphosphate receptor, type 1                                          | 4.10E-05 | No  | No  | Yes | No  | No  | No  | No  |
| 4715   | NDUFB9  | NADH dehydrogenase (ubiquinone) 1 beta subcomplex, 9, 22kDa                           | 4.11E-05 | Yes | No  | Yes | No  | No  | No  | No  |
| 56659  | KCNK13  | potassium channel, subfamily K, member 13                                             | 4.13E-05 | Yes | No  | No  | Yes | No  | No  | No  |
| 10576  | CCT2    | chaperonin containing TCP1, subunit 2 (beta)                                          | 4.17E-05 | No  | No  | Yes | No  | No  | No  | No  |
| 1767   | DNAH5   | dynein, axonemal, heavy chain 5                                                       | 4.17E-05 | No  | Yes | Yes | No  | No  | No  | No  |
| 10021  | HCN4    | hyperpolarization activated cyclic nucleotide-gated potassium channel 4               | 4.17E-05 | No  |
| 203562 | TMEM31  | transmembrane protein 31                                                              | 4.17E-05 | No  | No  | No  | Yes | No  | No  | No  |
| 10302  | SNAPC5  | small nuclear RNA activating complex, polypeptide 5, 19kDa                            | 4.18E-05 | No  | No  | Yes | No  | No  | No  | No  |
| 7181   | NR2C1   | nuclear receptor subfamily 2, group C, member 1                                       | 4.18E-05 | Yes | No  | Yes | No  | No  | No  | No  |
| 158506 | ZNF645  | zinc finger protein 645                                                               | 4.18E-05 | No  | No  | Yes | No  | No  | No  | No  |
| 23384  | SPECC1L | SPECC1-like                                                                           | 4.18E-05 | No  | No  | Yes | No  | No  | No  | No  |
| 246269 | LACE1   | lactation elevated 1                                                                  | 4.19E-05 | No  | No  | Yes | No  | No  | Yes | No  |
| 318    | NUDT2   | nudix (nucleoside diphosphate linked moiety X)-type motif 2                           | 4.21E-05 | No  | No  | Yes | No  | No  | No  | No  |
| 51646  | YPEL5   | yippee-like 5 (Drosophila)                                                            | 4.22E-05 | No  | No  | Yes | No  | No  | Yes | No  |
| 3175   | ONECUT1 | one cut homeobox 1                                                                    | 4.22E-05 | No  | No  | Yes | No  | No  | No  | No  |
| 3956   | LGALS1  | lectin, galactoside-binding, soluble, 1 (galectin 1)                                  | 4.23E-05 | No  | No  | No  | Yes | No  | No  | No  |
| 4862   | NPAS2   | neuronal PAS domain protein 2                                                         | 4.24E-05 | Yes | No  | No  | Yes | No  | No  | No  |
| 80005  | DOCK5   | dedicator of cytokinesis 5                                                            | 4.25E-05 | Yes | No  | Yes | No  | No  | No  | No  |
| 7320   | UBE2B   | ubiquitin-conjugating enzyme E2B (RAD6 homolog)                                       | 4.26E-05 | Yes | No  | No  | No  | Yes | No  | No  |
| 51265  | CDKL3   | cyclin-dependent kinase-like 3                                                        | 4.26E-05 | No  | No  | No  | No  | Yes | No  | No  |
| 5858   | PZP     | pregnancy-zone protein                                                                | 4.26E-05 | No  | No  | Yes | No  | No  | No  | No  |
| 2995   | GYPC    | glycophorin C (Gerbich blood group)                                                   | 4.27E-05 | No  |

|        |           |                                                                                 |          |     |     |     |     |     |     |    |
|--------|-----------|---------------------------------------------------------------------------------|----------|-----|-----|-----|-----|-----|-----|----|
| 202333 | CMYA5     | cardiomyopathy associated 5                                                     | 4.28E-05 | No  | No  | Yes | No  | No  | No  | No |
| 23398  | PPWD1     | peptidylprolyl isomerase domain and WD repeat containing 1                      | 4.29E-05 | No  | No  | Yes | No  | No  | Yes | No |
| 962    | CD48      | CD48 molecule                                                                   | 4.32E-05 | Yes | No  | No  | Yes | No  | No  | No |
| 84961  | FBXL20    | F-box and leucine-rich repeat protein 20                                        | 4.32E-05 | Yes | No  | Yes | No  | No  | No  | No |
| 369    | ARAF      | v-raf murine sarcoma 3611 viral oncogene homolog                                | 4.33E-05 | No  | No  | No  | No  | Yes | No  | No |
| 79689  | STEAP4    | STEAP family member 4                                                           | 4.33E-05 | No  | No  | Yes | No  | No  | No  | No |
| 3376   | IARS      | isoleucyl-tRNA synthetase                                                       | 4.33E-05 | No  | No  | No  | Yes | No  | No  | No |
| 196074 | METT5D1   | methyltransferase 5 domain containing 1                                         | 4.34E-05 | No  | No  | Yes | No  | No  | No  | No |
| 3460   | IFNGR2    | interferon gamma receptor 2 (interferon gamma transducer 1)                     | 4.34E-05 | No  | No  | Yes | No  | No  | No  | No |
| 2950   | GSTP1     | glutathione S-transferase pi                                                    | 4.37E-05 | No  | No  | No  | No  | Yes | No  | No |
| 9978   | RBX1      | ring-box 1                                                                      | 4.37E-05 | No  | No  | No  | No  | No  | No  | No |
| 51540  | SCLY      | selenocysteine lyase                                                            | 4.37E-05 | Yes | No  | No  | No  | No  | No  | No |
| 89885  | FATE1     | fetal and adult testis expressed 1                                              | 4.39E-05 | No  | No  | Yes | No  | No  | No  | No |
| 64121  | RRAGC     | Ras-related GTP binding C                                                       | 4.40E-05 | No  | Yes | No  | Yes | No  | No  | No |
| 84698  | CAPS2     | calcyphosine 2                                                                  | 4.40E-05 | No  | No  | Yes | No  | No  | No  | No |
| 9922   | IQSEC1    | IQ motif and Sec7 domain 1                                                      | 4.42E-05 | Yes | No  | No  | No  | No  | No  | No |
| 286554 | BCORL2    | BCL6 co-repressor-like 2                                                        | 4.43E-05 | NA  | No  | Yes | No  | No  | No  | No |
| 155066 | ATP6V0E2  | ATPase, H+-transporting V0 subunit e2                                           | 4.44E-05 | No  | No  | Yes | No  | No  | No  | No |
| 51316  | PLAC8     | placenta-specific 8                                                             | 4.45E-05 | Yes | No  | Yes | No  | No  | Yes | No |
| 6576   | SLC25A1   | solute carrier family 25 (mitochondrial carrier, citrate transporter), member 1 | 4.48E-05 | No  | No  | Yes | No  | No  | No  | No |
| 340665 | CYP26C1   | cytochrome P450, family 26, subfamily C, polypeptide 1                          | 4.49E-05 | NA  | No  | No  | Yes | No  | No  | No |
| 5915   | RARB      | retinoic acid receptor, beta                                                    | 4.50E-05 | No  | No  | No  | Yes | No  | No  | No |
| 6543   | SLC8A2    | solute carrier family 8 (sodium-calcium exchanger), member 2                    | 4.51E-05 | No  | No  | No  | Yes | No  | No  | No |
| 6128   | RPL6      | ribosomal protein L6                                                            | 4.52E-05 | No  | No  | No  | No  | Yes | No  | No |
| 201175 | LOC201175 | hypothetical protein LOC201175                                                  | 4.53E-05 | Yes | No  | No  | Yes | No  | No  | No |
| 3371   | TNC       | tenascin C (hexabrachion)                                                       | 4.53E-05 | Yes | No  | Yes | No  | No  | No  | No |
| 2169   | FABP2     | fatty acid binding protein 2, intestinal                                        | 4.53E-05 | No  | No  | Yes | No  | No  | No  | No |
| 9416   | DDX23     | DEAD (Asp-Glu-Ala-Asp) box polypeptide 23                                       | 4.54E-05 | No  | No  | Yes | No  | No  | No  | No |
| 7350   | UCP1      | uncoupling protein 1 (mitochondrial, proton carrier)                            | 4.54E-05 | No  | No  | No  | No  | Yes | No  | No |
| 7846   | TUBA1A    | tubulin, alpha 1a                                                               | 4.57E-05 | Yes | No  | No  | Yes | No  | No  | No |
| 5007   | OSBP      | oxysterol binding protein                                                       | 4.57E-05 | No  | No  | Yes | No  | No  | No  | No |
| 7464   | CORO2A    | coronin, actin binding protein, 2A                                              | 4.58E-05 | No  | No  | No  | No  | No  | No  | No |
| 24145  | PANX1     | pannexin 1                                                                      | 4.58E-05 | Yes | Yes | No  | Yes | No  | No  | No |
| 9425   | CDYL      | chromodomain protein, Y-like                                                    | 4.59E-05 | Yes | Yes | Yes | No  | No  | No  | No |



|        |          |                                                                                                  |          |     |    |     |     |    |     |    |
|--------|----------|--------------------------------------------------------------------------------------------------|----------|-----|----|-----|-----|----|-----|----|
| 51115  | FAM2B    | family with sequence similarity 82, member B                                                     | 4.59E-05 | No  | No | Yes | No  | No | No  | No |
| 131377 | KBTBD5   | kelch repeat and BTB (POZ) domain containing 5                                                   | 4.61E-05 | No  | No | Yes | No  | No | No  | No |
| 55105  | GPATCH2  | G patch domain containing 2                                                                      | 4.61E-05 | No  | No | Yes | No  | No | No  | No |
| 54433  | NOLA1    | nucleolar protein family A, member 1 (H/ACA small nucleolar RNPs)                                | 4.62E-05 | No  | No | Yes | No  | No | No  | No |
| 55180  | LINS1    | lines homolog 1 (Drosophila)                                                                     | 4.62E-05 | Yes | No | No  | Yes | No | Yes | No |
| 5413   | SEPT5    | septin 5                                                                                         | 4.62E-05 | NA  | No | No  | No  | No | No  | No |
| 10798  | ORS1     | olfactory receptor, family 5, subfamily 1, member 1                                              | 4.62E-05 | No  | No | No  | Yes | No | No  | No |
| 5777   | PTPN6    | protein tyrosine phosphatase, non-receptor type 6                                                | 4.64E-05 | Yes | No | No  | Yes | No | No  | No |
| 5980   | REV3L    | REV3-like, catalytic subunit of DNA polymerase zeta (yeast)                                      | 4.64E-05 | Yes | No | Yes | No  | No | No  | No |
| 11211  | FZD10    | frizzled homolog 10 (Drosophila)                                                                 | 4.66E-05 | No  | No | No  | Yes | No | No  | No |
| 4673   | NAP1L1   | nucleosome assembly protein 1-like 1                                                             | 4.66E-05 | No  | No | Yes | No  | No | No  | No |
| 51380  | CSAD     | cysteine sulfonic acid decarboxylase                                                             | 4.68E-05 | No  | No | No  | No  | No | Yes | No |
| 4288   | MK167    | antigen identified by monoclonal antibody Ki-67                                                  | 4.68E-05 | No  | No | Yes | No  | No | No  | No |
| 221908 | C7orf47  | chromosome 7 open reading frame 47                                                               | 4.69E-05 | No  | No | No  | Yes | No | No  | No |
| 26146  | TRAF3IP1 | TNF receptor-associated factor 3 interacting protein 1                                           | 4.70E-05 | No  | No | No  | No  | No | No  | No |
| 2191   | FAP      | fibroblast activation protein, alpha                                                             | 4.70E-05 | No  | No | Yes | No  | No | No  | No |
| 2149   | F2R      | coagulation factor II (thrombin) receptor                                                        | 4.70E-05 | Yes | No | Yes | No  | No | No  | No |
| 9513   | FXR2     | fragile X mental retardation, autosomal homolog 2                                                | 4.72E-05 | No  | No | No  | Yes | No | No  | No |
| 135932 | TMEM139  | transmembrane protein 139                                                                        | 4.75E-05 | No  | No | Yes | No  | No | No  | No |
| 26005  | C2CD3    | C2 calcium-dependent domain containing 3                                                         | 4.75E-05 | No  | No | Yes | No  | No | No  | No |
| 2329   | FMO4     | flavin containing monooxygenase 4                                                                | 4.75E-05 | No  | No | Yes | No  | No | No  | No |
| 50805  | IRX4     | iroquois homeobox 4                                                                              | 4.75E-05 | No  | No | No  | Yes | No | No  | No |
| 81619  | TSPAN14  | tetraspanin 14                                                                                   | 4.75E-05 | No  | No | No  | Yes | No | No  | No |
| 7325   | UBE2E2   | ubiquitin-conjugating enzyme E2E 2 (UBC4/5 homolog, yeast)                                       | 4.76E-05 | Yes | No | Yes | No  | No | Yes | No |
| 8641   | PCDHGB4  | protocadherin gamma subfamily B, 4                                                               | 4.78E-05 | NA  | No | Yes | No  | No | No  | No |
| 223082 | ZNRF2    | zinc and ring finger 2                                                                           | 4.79E-05 | No  | No | No  | No  | No | No  | No |
| 114805 | GALNT13  | UDP-N-acetyl-alpha-D-galactosamine:polypeptide N-acetylgalactosaminyltransferase 13 (GalNAc-T13) | 4.83E-05 | No  | No | Yes | No  | No | No  | No |
| 51350  | KRT76    | keratin 76                                                                                       | 4.86E-05 | No  | No | No  | No  | No | No  | No |
| 2582   | GALE     | UDP-galactose-4-epimerase                                                                        | 4.87E-05 | No  | No | Yes | No  | No | No  | No |
| 55240  | STEAP3   | STEAP family member 3                                                                            | 4.89E-05 | No  | No | No  | Yes | No | No  | No |
| 1477   | CSTF1    | cleavage stimulation factor, 3' pre-RNA, subunit 1, 50kDa                                        | 4.89E-05 | No  | No | Yes | No  | No | Yes | No |
| 2256   | FGF11    | fibroblast growth factor 11                                                                      | 4.90E-05 | No  | No | Yes | No  | No | No  | No |
| 22835  | ZFP30    | zinc finger protein 30 homolog (mouse)                                                           | 4.90E-05 | No  | No | Yes | No  | No | Yes | No |
| 84268  | RPAIN    | RPA interacting protein                                                                          | 4.91E-05 | No  | No | No  | Yes | No | Yes | No |

|        |          |                                                                         |          |     |     |     |     |     |     |     |
|--------|----------|-------------------------------------------------------------------------|----------|-----|-----|-----|-----|-----|-----|-----|
| 8785   | MATN4    | matrilin 4                                                              | 4.92E-05 | No  | No  | Yes | No  | No  | No  | No  |
| 1029   | CDKN2A   | cyclin-dependent kinase inhibitor 2A (melanoma, p16, inhibits CDK4)     | 4.95E-05 | No  | No  | No  | Yes | No  | No  | No  |
| 7332   | UBE2L3   | ubiquitin-conjugating enzyme E2L 3                                      | 4.95E-05 | No  | No  | Yes | No  | No  | No  | No  |
| 64976  | MRPL40   | mitochondrial ribosomal protein L40                                     | 4.97E-05 | No  | No  | No  | Yes | No  | No  | No  |
| 79158  | GNPTAB   | N-acetylglucosamine-1-phosphate transferase, alpha and beta subunits    | 4.98E-05 | Yes | Yes | No  | Yes | No  | No  | No  |
| 9821   | RB1CC1   | RB1-inducible coiled-coil 1                                             | 4.98E-05 | No  | No  | Yes | No  | No  | No  | No  |
| 57599  | WDR48    | WD repeat domain 48                                                     | 4.98E-05 | No  | No  | Yes | No  | No  | No  | No  |
| 9139   | CBFA2T2  | core-binding factor, runt domain, alpha subunit 2; translocated to, 2   | 4.99E-05 | No  | No  | Yes | No  | No  | No  | No  |
| 10785  | WDR4     | WD repeat domain 4                                                      | 4.99E-05 | No  | No  | Yes | No  | No  | No  | No  |
| 6482   | ST3GAL1  | ST3 beta-galactoside alpha-2,3-sialyltransferase 1                      | 5.00E-05 | Yes | No  | No  | Yes | No  | Yes | Yes |
| 116441 | TM4SF18  | transmembrane 4 L six family member 18                                  | 5.00E-05 | No  |
| 9615   | GDA      | guanine deaminase                                                       | 5.00E-05 | No  | No  | Yes | No  | No  | No  | No  |
| 10885  | WDR3     | WD repeat domain 3                                                      | 5.01E-05 | No  | Yes | No  | No  | Yes | Yes | No  |
| 91408  | BTF3L4   | basic transcription factor 3-like 4                                     | 5.02E-05 | Yes | No  | No  | No  | No  | Yes | No  |
| 64743  | WDR13    | WD repeat domain 13                                                     | 5.03E-05 | No  | No  | Yes | No  | No  | No  | No  |
| 10844  | TUBGCP2  | tubulin, gamma complex associated protein 2                             | 5.03E-05 | No  | No  | Yes | No  | No  | No  | No  |
| 5728   | PTEN     | phosphatase and tensin homolog (mutated in multiple advanced cancers 1) | 5.04E-05 | Yes | No  | No  | No  | No  | Yes | No  |
| 387694 | SH2D4B   | SH2 domain containing 4B                                                | 5.04E-05 | No  | No  | No  | No  | Yes | No  | No  |
| 26234  | FBXL5    | F-box and leucine-rich repeat protein 5                                 | 5.04E-05 | No  | No  | Yes | No  | No  | Yes | No  |
| 127262 | TPRG1L   | tumor protein p63 regulated 1-like                                      | 5.04E-05 | No  | No  | Yes | No  | No  | No  | No  |
| 222643 | UNC5CL   | unc-5 homolog C (C. elegans)-like                                       | 5.04E-05 | No  | No  | No  | Yes | No  | No  | No  |
| 813    | CALU     | calumenin                                                               | 5.06E-05 | No  | No  | Yes | No  | No  | No  | No  |
| 1468   | CTBP2    | C-terminal binding protein 2                                            | 5.07E-05 | No  |
| 283847 | CDC79    | coiled-coil domain containing 79                                        | 5.07E-05 | Yes | No  | Yes | No  | No  | No  | No  |
| 283471 | TMPRSS12 | transmembrane protease, serine 12                                       | 5.09E-05 | Yes | No  | Yes | No  | No  | No  | No  |
| 11147  | HHLA3    | HERV-H LTR-associating 3                                                | 5.09E-05 | Yes | No  | Yes | No  | No  | No  | No  |
| 23649  | POLA2    | polymerase (DNA directed), alpha 2 (70kD subunit)                       | 5.10E-05 | No  | No  | Yes | No  | No  | No  | No  |
| 6232   | RPS27    | ribosomal protein S27 (metalloprotein 1)                                | 5.11E-05 | Yes | No  | Yes | No  | No  | No  | No  |
| 5872   | RAB13    | RAB13, member RAS oncogene family                                       | 5.11E-05 | No  | No  | Yes | No  | No  | No  | No  |
| 148170 | CDC42EP5 | CDC42 effector protein (Rho GTPase binding) 5                           | 5.11E-05 | Yes | No  | No  | Yes | No  | No  | No  |
| 2928   | GSC2     | goosecoid homeobox 2                                                    | 5.12E-05 | No  |
| 522    | ATP5J    | ATP synthase, H+ transporting, mitochondrial FO complex, subunit F6     | 5.13E-05 | No  | No  | No  | No  | Yes | No  | No  |
| 147011 | PROCA1   | proline-rich cyclin A1-interacting protein                              | 5.13E-05 | No  | No  | Yes | No  | No  | No  | No  |
| 334    | APLP2    | amyloid beta (A4) precursor-like protein 2                              | 5.15E-05 | No  | Yes | Yes | No  | No  | No  | No  |

|        |          |                                                                                                          |          |     |     |     |     |     |     |    |
|--------|----------|----------------------------------------------------------------------------------------------------------|----------|-----|-----|-----|-----|-----|-----|----|
| 692199 | SNORD84  | small nucleolar RNA, C/D box 84                                                                          | 5.18E-05 | NA  | No  | No  | Yes | No  | No  | No |
| 3655   | ITGA6    | integrin, alpha 6                                                                                        | 5.18E-05 | Yes | No  | Yes | No  | No  | No  | No |
| 60386  | SLC25A19 | solute carrier family 25 (mitochondrial thiamine pyrophosphate carrier), member 19                       | 5.18E-05 | No  | No  | Yes | No  | No  | No  | No |
| 91272  | FAM44B   | family with sequence similarity 44, member B                                                             | 5.19E-05 | No  | No  | Yes | No  | No  | No  | No |
| 4712   | NDUFB6   | NADH dehydrogenase (ubiquinone) 1 beta subcomplex, 6, 17kDa                                              | 5.19E-05 | No  | No  | Yes | No  | No  | No  | No |
| 7490   | WT1      | Wilms tumor 1                                                                                            | 5.22E-05 | No  | No  | Yes | No  | No  | No  | No |
| 51742  | ARID4B   | AT rich interactive domain 4B (RBP1-like)                                                                | 5.22E-05 | No  | No  | Yes | No  | No  | No  | No |
| 157769 | FAM91A1  | family with sequence similarity 91, member A1                                                            | 5.23E-05 | No  | No  | Yes | No  | No  | Yes | No |
| 23524  | SRRM2    | serine/arginine repetitive matrix 2                                                                      | 5.23E-05 | No  | No  | No  | Yes | No  | No  | No |
| 5305   | PIP4K2A  | phosphatidylinositol-5-phosphate 4-kinase, type II, alpha                                                | 5.24E-05 | No  | No  | Yes | No  | No  | Yes | No |
| 8541   | PPF1A3   | protein tyrosine phosphatase, receptor type, I polypeptide (PTPRF), interacting protein (Iprin), alpha 3 | 5.26E-05 | No  | No  | No  | Yes | No  | No  | No |
| 7296   | TXNRD1   | thioredoxin reductase 1                                                                                  | 5.27E-05 | No  | No  | Yes | No  | No  | No  | No |
| 1119   | CHKA     | choline kinase alpha                                                                                     | 5.29E-05 | No  | No  | No  | Yes | No  | No  | No |
| 11317  | RBPJL    | recombination signal binding protein for immunoglobulin kappa J region-like                              | 5.31E-05 | No  | No  | Yes | No  | No  | No  | No |
| 5770   | PTPN1    | protein tyrosine phosphatase, non-receptor type 1                                                        | 5.31E-05 | Yes | No  | No  | No  | No  | No  | No |
| 4090   | SMAD5    | SMAD family member 5                                                                                     | 5.31E-05 | No  | No  | Yes | No  | No  | No  | No |
| 54870  | QRICH1   | glutamine-rich 1                                                                                         | 5.31E-05 | No  | No  | Yes | No  | No  | No  | No |
| 6181   | RPLP2    | ribosomal protein, large, P2                                                                             | 5.32E-05 | No  | No  | No  | No  | No  | No  | No |
| 55367  | LRDD     | leucine-rich repeats and death domain containing                                                         | 5.32E-05 | No  | No  | No  | No  | No  | No  | No |
| 10483  | SEC23B   | Sec23 homolog B (S. cerevisiae)                                                                          | 5.32E-05 | No  | No  | Yes | No  | No  | No  | No |
| 10523  | CHERP    | calcium homeostasis endoplasmic reticulum protein                                                        | 5.32E-05 | No  | No  | No  | Yes | No  | No  | No |
| 54518  | APBB1IP  | amyloid beta (A4) precursor protein-binding, family B, member 1 interacting protein                      | 5.33E-05 | No  | No  | Yes | No  | No  | No  | No |
| 79154  | MGC4172  | short-chain dehydrogenase/reductase                                                                      | 5.33E-05 | No  | No  | No  | No  | No  | No  | No |
| 3761   | KCNJ4    | potassium inwardly-rectifying channel, subfamily J, member 4                                             | 5.34E-05 | Yes | No  | No  | No  | No  | No  | No |
| 5063   | PAK3     | p21 protein (Cdc42/Rac)-activated kinase 3                                                               | 5.34E-05 | No  | No  | Yes | No  | No  | No  | No |
| 54345  | SOX18    | SRY (sex determining region Y)-box 18                                                                    | 5.35E-05 | Yes | No  | No  | No  | No  | No  | No |
| 8539   | API5     | apoptosis inhibitor 5                                                                                    | 5.35E-05 | No  | No  | Yes | No  | No  | No  | No |
| 84826  | SFT2D3   | SFT2 domain containing 3                                                                                 | 5.36E-05 | No  | No  | No  | Yes | No  | Yes | No |
| 9118   | INA      | intermixin neuronal intermediate filament protein, alpha                                                 | 5.36E-05 | No  | No  | No  | Yes | No  | No  | No |
| 9818   | NUPL1    | nucleoporin like 1                                                                                       | 5.36E-05 | No  | No  | No  | No  | Yes | No  | No |
| 8507   | ENC1     | ectodermal-neural cortex (with BTB-like domain)                                                          | 5.37E-05 | Yes | Yes | Yes | No  | No  | No  | No |
| 25930  | PTPN23   | protein tyrosine phosphatase, non-receptor type 23                                                       | 5.37E-05 | Yes | No  | Yes | No  | No  | No  | No |
| 63979  | FIGNL1   | figletin-like 1                                                                                          | 5.39E-05 | No  | No  | Yes | No  | No  | No  | No |
| 6675   | UAP1     | UDP-N-acetylglucosamine pyrophosphorylase 1                                                              | 5.39E-05 | No  | No  | Yes | No  | No  | No  | No |

|        |         |                                                                        |          |     |     |     |     |     |     |     |
|--------|---------|------------------------------------------------------------------------|----------|-----|-----|-----|-----|-----|-----|-----|
| 161829 | EXDL1   | exonuclease 3'-5' domain-like 1                                        | 5.40E-05 | No  | No  | Yes | No  | No  | No  | No  |
| 28998  | MRPL13  | mitochondrial ribosomal protein L13                                    | 5.42E-05 | No  | No  | No  | Yes | No  | Yes | No  |
| 51661  | FKBP7   | FK506 binding protein 7                                                | 5.42E-05 | Yes | No  | No  | Yes | No  | Yes | No  |
| 10319  | LAMC3   | laminin, gamma 3                                                       | 5.43E-05 | No  | No  | Yes | No  | No  | No  | No  |
| 10541  | ANP32B  | acidic (leucine-rich) nuclear phosphoprotein 32 family, member B       | 5.44E-05 | No  | No  | No  | Yes | No  | No  | No  |
| 7408   | VASP    | vasodilator-stimulated phosphoprotein                                  | 5.45E-05 | No  | No  | No  | No  | Yes | No  | No  |
| 4731   | NDUFV3  | NADH dehydrogenase (ubiquinone) flavoprotein 3, 10kDa                  | 5.45E-05 | No  | No  | Yes | No  | No  | No  | No  |
| 1565   | CYP2D6  | cytochrome P450, family 2, subfamily D, polypeptide 6                  | 5.47E-05 | NA  | No  | Yes | No  | No  | No  | No  |
| 388536 | ZNF790  | zinc finger protein 790                                                | 5.47E-05 | NA  | No  | Yes | No  | No  | No  | No  |
| 3363   | HTR7    | 5-hydroxytryptamine (serotonin) receptor 7 (adenylate cyclase-coupled) | 5.48E-05 | No  | No  | Yes | No  | No  | No  | No  |
| 153572 | IRX2    | irquois homeobox 2                                                     | 5.48E-05 | No  | No  | No  | Yes | No  | No  | No  |
| 23517  | SKIV2L2 | superkiller viralicidic activity 2-like 2 (S. cerevisiae)              | 5.48E-05 | No  | No  | Yes | No  | No  | Yes | No  |
| 9332   | CD163   | CD163 molecule                                                         | 5.50E-05 | No  | No  | Yes | No  | No  | No  | No  |
| 29803  | REPIN1  | replication initiator 1                                                | 5.50E-05 | No  | No  | Yes | No  | No  | Yes | No  |
| 91612  | CHURC1  | churchill domain containing 1                                          | 5.50E-05 | No  | No  | Yes | No  | No  | No  | No  |
| 54106  | TLR9    | tolllike receptor 9                                                    | 5.50E-05 | Yes | No  | No  | No  | No  | No  | No  |
| 3732   | CD82    | CD82 molecule                                                          | 5.50E-05 | Yes | No  | No  | No  | No  | No  | No  |
| 54707  | GPN2    | GPN-loop GTPase 2                                                      | 5.51E-05 | No  | No  | Yes | No  | No  | No  | No  |
| 23788  | MTCH2   | mitochondrial carrier homolog 2 (C. elegans)                           | 5.52E-05 | No  | No  | No  | Yes | No  | No  | No  |
| 22839  | DLGAP4  | discs, large (Drosophila) homolog-associated protein 4                 | 5.54E-05 | Yes | No  | No  | Yes | No  | No  | No  |
| 283316 | CD163L1 | CD163 molecule-like 1                                                  | 5.54E-05 | No  | No  | Yes | No  | No  | No  | No  |
| 4892   | NRAP    | nebulin-related anchoring protein                                      | 5.54E-05 | Yes | No  | Yes | No  | No  | No  | No  |
| 377    | ARF3    | ADP-ribosylation factor 3                                              | 5.56E-05 | No  | No  | No  | No  | Yes | Yes | Yes |
| 84436  | ZNF528  | zinc finger protein 528                                                | 5.56E-05 | No  | No  | Yes | No  | No  | No  | No  |
| 11056  | DDX52   | DEAD (Asp-Glu-Ala-Asp) box polypeptide 52                              | 5.58E-05 | Yes | No  | No  | Yes | No  | No  | No  |
| 3238   | HOXD12  | homeobox D12                                                           | 5.58E-05 | No  | No  | Yes | No  | No  | No  | No  |
| 53942  | CNTN5   | contactin 5                                                            | 5.59E-05 | No  | No  | No  | Yes | No  | No  | No  |
| 22898  | DENND3  | DENNMADD domain containing 3                                           | 5.63E-05 | No  | Yes | Yes | No  | No  | No  | No  |
| 166785 | MMAA    | methylmalonic aciduria (cobalamin deficiency) cblA type                | 5.64E-05 | Yes | Yes | Yes | No  | No  | No  | No  |
| 23094  | SIPA1L3 | signal-induced proliferation-associated 1 like 3                       | 5.65E-05 | Yes | No  | Yes | No  | No  | No  | No  |
| 10114  | HIPK3   | homeodomain interacting protein kinase 3                               | 5.66E-05 | No  | No  | No  | Yes | No  | No  | No  |
| 80224  | NUBPL   | nucleotide binding protein-like                                        | 5.66E-05 | No  | No  | No  | Yes | No  | No  | No  |
| 4924   | NUCB1   | nucleobindin 1                                                         | 5.67E-05 | Yes | No  | Yes | No  | No  | No  | No  |
| 7288   | TULP2   | tubby like protein 2                                                   | 5.67E-05 | No  | No  | Yes | No  | No  | No  | No  |

|        |           |                                                                                                       |          |     |    |     |     |     |     |    |
|--------|-----------|-------------------------------------------------------------------------------------------------------|----------|-----|----|-----|-----|-----|-----|----|
| 9462   | RASAL2    | RAS protein activator like 2                                                                          | 5.68E-05 | Yes | No | Yes | No  | No  | Yes | No |
| 2182   | ACSL4     | acyl-CoA synthetase long-chain family member 4                                                        | 5.68E-05 | No  | No | Yes | No  | No  | No  | No |
| 81472  | OR2C3     | olfactory receptor, family 2, subfamily C, member 3                                                   | 5.69E-05 | No  | No | Yes | No  | No  | No  | No |
| 2286   | FKBP2     | FK506 binding protein 2, 13kDa                                                                        | 5.69E-05 | No  | No | No  | No  | Yes | No  | No |
| 6158   | RPL28     | ribosomal protein L28                                                                                 | 5.70E-05 | No  | No | No  | No  | No  | No  | No |
| 5179   | PENK      | proenkephalin                                                                                         | 5.70E-05 | No  | No | No  | Yes | No  | No  | No |
| 3237   | HOXD11    | homeobox D11                                                                                          | 5.71E-05 | No  | No | Yes | No  | No  | No  | No |
| 51375  | SNX7      | sorting nexin 7                                                                                       | 5.74E-05 | No  | No | Yes | No  | No  | No  | No |
| 4248   | MGAT3     | mannosyl (beta-1,4-)-glycoprotein beta-1,4-N-acetylglucosaminyltransferase                            | 5.75E-05 | Yes | No | No  | No  | No  | No  | No |
| 252867 | MDM1      | Mitochondrial deafness modifier 1                                                                     | 5.75E-05 | NA  | No | Yes | No  | No  | No  | No |
| 829    | CAPZA1    | capping protein (actin filament) muscle Z-line, alpha 1                                               | 5.76E-05 | No  | No | Yes | No  | No  | Yes | No |
| 60559  | SPCS3     | signal peptidase complex subunit 3 homolog (S. cerevisiae)                                            | 5.78E-05 | No  | No | Yes | No  | No  | No  | No |
| 54798  | DCHS2     | dachsous 2 (Drosophila)                                                                               | 5.78E-05 | Yes | No | No  | No  | Yes | No  | No |
| 9949   | AMMECR1   | Alport syndrome, mental retardation, midface hypoplasia and elliptocytosis chromosomal region, gene 1 | 5.81E-05 | Yes | No | No  | No  | Yes | Yes | No |
| 4215   | MAP3K3    | mitogen-activated protein kinase kinase kinase 3                                                      | 5.82E-05 | Yes | No | Yes | No  | No  | No  | No |
| 8620   | NPPF      | neuropeptide FF-amide peptide precursor                                                               | 5.84E-05 | No  | No | No  | Yes | No  | No  | No |
| 55917  | CTTNBP2NL | CTTNBP2 N-terminal like                                                                               | 5.85E-05 | Yes | No | Yes | No  | No  | No  | No |
| 23528  | ZNF281    | zinc finger protein 281                                                                               | 5.85E-05 | No  | No | No  | No  | No  | Yes | No |
| 10144  | FAM13A1   | family with sequence similarity 13, member A1                                                         | 5.85E-05 | No  | No | Yes | No  | No  | No  | No |
| 114791 | TUBGCP5   | tubulin, gamma complex associated protein 5                                                           | 5.85E-05 | No  | No | No  | Yes | No  | Yes | No |
| 493911 | PHOSPHO2  | phosphatase, orphan 2                                                                                 | 5.87E-05 | Yes | No | Yes | No  | No  | No  | No |
| 6480   | ST6GAL1   | ST6 beta-galactosamide alpha-2,6-sialyltransferase 1                                                  | 5.88E-05 | No  | No | No  | No  | No  | No  | No |
| 171484 | FAM9C     | family with sequence similarity 9, member C                                                           | 5.89E-05 | No  | No | Yes | No  | No  | No  | No |
| 83475  | DOHH      | deoxyhypusine hydroxylase/monooxygenase                                                               | 5.90E-05 | Yes | No | Yes | No  | No  | No  | No |
| 26228  | STAP1     | signal transducing adaptor family member 1                                                            | 5.90E-05 | No  | No | No  | Yes | No  | No  | No |
| 1515   | CTSL2     | cathepsin L2                                                                                          | 5.90E-05 | No  | No | No  | Yes | No  | No  | No |
| 8085   | MLL2      | myeloid/lymphoid or mixed-lineage leukemia 2                                                          | 5.92E-05 | Yes | No | No  | Yes | No  | No  | No |
| 5983   | RFC3      | replication factor C (activator 1) 3, 38kDa                                                           | 5.94E-05 | No  | No | Yes | No  | No  | No  | No |
| 29926  | GMPPA     | GDP-mannose pyrophosphorylase A                                                                       | 5.94E-05 | No  | No | No  | Yes | No  | No  | No |
| 219970 | GLYATL2   | glycine-N-acyltransferase-like 2                                                                      | 5.95E-05 | No  | No | Yes | No  | No  | No  | No |
| 55034  | MOCOS     | molybdenum cofactor sulfurase                                                                         | 5.96E-05 | No  | No | Yes | No  | No  | No  | No |
| 54482  | CCDC76    | coiled-coil domain containing 76                                                                      | 5.97E-05 | No  | No | Yes | No  | No  | Yes | No |
| 9681   | DEPDC5    | DEP domain containing 5                                                                               | 5.97E-05 | No  | No | Yes | No  | No  | No  | No |
| 160140 | C11orf65  | chromosome 11 open reading frame 65                                                                   | 5.97E-05 | No  | No | Yes | No  | No  | No  | No |

|        |          |                                                                        |          |     |     |     |     |     |     |     |
|--------|----------|------------------------------------------------------------------------|----------|-----|-----|-----|-----|-----|-----|-----|
| 51307  | FAM53C   | family with sequence similarity 53, member C                           | 5.97E-05 | No  | No  | Yes | No  | No  | Yes | No  |
| 995    | CDC25C   | cell division cycle 25 homolog C (S. pombe)                            | 5.97E-05 | No  | No  | Yes | No  | No  | No  | No  |
| 28978  | TMEM14A  | transmembrane protein 14A                                              | 5.97E-05 | No  | No  | No  | Yes | No  | No  | No  |
| 84108  | PCGF6    | polycomb group ring finger 6                                           | 5.99E-05 | No  | No  | Yes | No  | No  | No  | No  |
| 2180   | ACSL1    | acyl-CoA synthetase long-chain family member 1                         | 5.99E-05 | Yes | No  | No  | Yes | No  | No  | No  |
| 80230  | RUFY1    | RUN and FYVE domain containing 1                                       | 6.00E-05 | No  | No  | Yes | No  | No  | No  | No  |
| 114784 | CSMD2    | CUB and Sushi multiple domains 2                                       | 6.00E-05 | No  | No  | Yes | No  | No  | No  | No  |
| 51303  | FKBP11   | FK506 binding protein 11, 19 kDa                                       | 6.01E-05 | Yes | No  | No  | No  | Yes | No  | No  |
| 113178 | SCAMP4   | secretory carrier membrane protein 4                                   | 6.01E-05 | Yes | No  | No  | Yes | No  | No  | No  |
| 3400   | ID4      | inhibitor of DNA binding 4, dominant negative helix-loop-helix protein | 6.01E-05 | No  | Yes | Yes | No  | No  | No  | No  |
| 165215 | FAM171B  | family with sequence similarity 171, member B                          | 6.02E-05 | No  | No  | Yes | No  | No  | No  | No  |
| 154810 | AMOTL1   | angiomin like 1                                                        | 6.06E-05 | No  | No  | Yes | No  | No  | No  | No  |
| 241    | ALOX5AP  | arachidonate 5-lipoxygenase-activating protein                         | 6.07E-05 | No  | No  | No  | Yes | No  | No  | No  |
| 5156   | PDGFRA   | platelet-derived growth factor receptor, alpha polypeptide             | 6.07E-05 | No  | No  | No  | Yes | No  | No  | No  |
| 8635   | RNASET2  | ribonuclease T2                                                        | 6.08E-05 | Yes | No  | No  | No  | No  | No  | No  |
| 6793   | STK10    | serine/threonine kinase 10                                             | 6.08E-05 | Yes | No  | Yes | No  | No  | No  | No  |
| 54521  | WDR44    | WD repeat domain 44                                                    | 6.08E-05 | Yes | No  | No  | Yes | No  | No  | No  |
| 2539   | G6PD     | glucose-6-phosphate dehydrogenase                                      | 6.08E-05 | No  |
| 622    | BDH1     | 3-hydroxybutyrate dehydrogenase, type 1                                | 6.08E-05 | No  | No  | Yes | No  | No  | No  | No  |
| 55753  | OGDHL    | oxoglutarate dehydrogenase-like                                        | 6.09E-05 | No  | No  | Yes | No  | No  | No  | No  |
| 9464   | HAND2    | heart and neural crest derivatives expressed 2                         | 6.09E-05 | No  | No  | No  | Yes | No  | No  | No  |
| 8202   | NCOA3    | nuclear receptor coactivator 3                                         | 6.10E-05 | No  | No  | No  | No  | Yes | No  | No  |
| 55259  | CASC1    | cancer susceptibility candidate 1                                      | 6.10E-05 | No  | No  | Yes | No  | No  | Yes | No  |
| 53981  | CPSF2    | cleavage and polyadenylation specific factor 2, 100kDa                 | 6.11E-05 | No  | No  | No  | Yes | No  | Yes | No  |
| 129080 | EMID1    | EMI domain containing 1                                                | 6.15E-05 | No  | No  | No  | Yes | No  | No  | No  |
| 7334   | UBE2N    | ubiquitin-conjugating enzyme E2N (UBC13 homolog, yeast)                | 6.16E-05 | No  | No  | Yes | No  | No  | Yes | No  |
| 10818  | FRS2     | fibroblast growth factor receptor substrate 2                          | 6.16E-05 | Yes | No  | No  | Yes | No  | No  | No  |
| 55891  | LENP     | lens epithelial protein                                                | 6.16E-05 | No  | No  | No  | Yes | No  | No  | No  |
| 60509  | AGBL5    | ATP/GTP binding protein-like 5                                         | 6.16E-05 | No  | No  | Yes | No  | No  | Yes | No  |
| 9143   | SYNGR3   | synaptogyrin 3                                                         | 6.17E-05 | Yes | No  | No  | Yes | No  | Yes | No  |
| 10236  | HNRNPR   | heterogeneous nuclear ribonucleoprotein R                              | 6.17E-05 | No  |
| 3725   | JUN      | jun oncogene                                                           | 6.20E-05 | Yes | No  | Yes | No  | No  | Yes | Yes |
| 79658  | ARHGAP10 | Rho GTPase activating protein 10                                       | 6.22E-05 | No  | No  | No  | Yes | No  | No  | No  |
| 6514   | SLC2A2   | solute carrier family 2 (facilitated glucose transporter), member 2    | 6.24E-05 | No  | No  | No  | Yes | No  | No  | No  |

|        |         |                                                                                               |          |     |    |     |     |     |     |    |
|--------|---------|-----------------------------------------------------------------------------------------------|----------|-----|----|-----|-----|-----|-----|----|
| 1495   | CTNNA1  | catenin (cadherin-associated protein), alpha 1, 102kDa                                        | 6.25E-05 | Yes | No | No  | Yes | No  | No  | No |
| 10554  | AGPAT1  | 1-acylglycerol-3-phosphate O-acyltransferase 1 (lysophosphatidic acid acyltransferase, alpha) | 6.25E-05 | No  | No | No  | Yes | No  | No  | No |
| 3911   | LAMA5   | laminin, alpha 5                                                                              | 6.27E-05 | No  | No | No  | No  | No  | No  | No |
| 7462   | LAT2    | linker for activation of T cells family, member 2                                             | 6.30E-05 | No  | No | Yes | No  | No  | No  | No |
| 60684  | C4orf41 | chromosome 4 open reading frame 41                                                            | 6.32E-05 | Yes | No | Yes | No  | No  | No  | No |
| 7264   | TSTA3   | tissue specific transplantation antigen P35B                                                  | 6.35E-05 | No  | No | No  | No  | No  | No  | No |
| 10726  | NUDC    | nuclear distribution gene C homolog (A. nidulans)                                             | 6.36E-05 | No  | No | Yes | No  | No  | No  | No |
| 4620   | MYH2    | myosin, heavy chain 2, skeletal muscle, adult                                                 | 6.38E-05 | No  | No | Yes | No  | No  | No  | No |
| 4891   | SLC11A2 | solute carrier family 11 (proton-coupled divalent metal ion transporters), member 2           | 6.38E-05 | Yes | No | Yes | No  | No  | No  | No |
| 29072  | SETD2   | SET domain containing 2                                                                       | 6.40E-05 | No  | No | Yes | No  | No  | No  | No |
| 1137   | CHRNA4  | cholinergic receptor, nicotinic, alpha 4                                                      | 6.42E-05 | No  | No | No  | No  | Yes | No  | No |
| 54555  | DDX49   | DEAD (Asp-Glu-Ala-Asp) box polypeptide 49                                                     | 6.42E-05 | No  | No | No  | Yes | No  | No  | No |
| 81629  | TSSK3   | testis-specific serine kinase 3                                                               | 6.43E-05 | Yes | No | Yes | No  | No  | No  | No |
| 130399 | ACVR1C  | activin A receptor, type IC                                                                   | 6.43E-05 | No  | No | Yes | No  | No  | No  | No |
| 10067  | SCAMP3  | secretory carrier membrane protein 3                                                          | 6.44E-05 | No  | No | Yes | No  | No  | No  | No |
| 84196  | USP48   | ubiquitin specific peptidase 48                                                               | 6.44E-05 | No  | No | No  | Yes | No  | Yes | No |
| 5775   | PTPN4   | protein tyrosine phosphatase, non-receptor type 4 (megakaryocyte)                             | 6.46E-05 | Yes | No | Yes | No  | No  | No  | No |
| 64318  | NOC3L   | nucleolar complex associated 3 homolog (S. cerevisiae)                                        | 6.48E-05 | Yes | No | Yes | No  | No  | No  | No |
| 1111   | CHEK1   | CHK1 checkpoint homolog (S. pombe)                                                            | 6.49E-05 | No  | No | No  | Yes | No  | No  | No |
| 139866 | SPIN4   | spindlin family, member 4                                                                     | 6.51E-05 | No  | No | Yes | No  | No  | No  | No |
| 8665   | EIF3F   | eukaryotic translation initiation factor 3, subunit F                                         | 6.52E-05 | No  | No | No  | Yes | No  | No  | No |
| 157570 | ESCO2   | establishment of cohesion 1 homolog 2 (S. cerevisiae)                                         | 6.55E-05 | No  | No | Yes | No  | No  | No  | No |
| 22900  | CARD8   | caspase recruitment domain family, member 8                                                   | 6.55E-05 | No  | No | Yes | No  | No  | No  | No |
| 84866  | TMEM25  | transmembrane protein 25                                                                      | 6.56E-05 | Yes | No | No  | Yes | No  | No  | No |
| 54878  | DPP8    | dipeptidyl-peptidase 8                                                                        | 6.57E-05 | No  | No | Yes | No  | No  | No  | No |
| 1389   | CREBL2  | cAMP responsive element binding protein-like 2                                                | 6.57E-05 | Yes | No | Yes | No  | No  | No  | No |
| 6677   | SPAM1   | sperm adhesion molecule 1 (PH-20 hyaluronidase, zona pellucida binding)                       | 6.57E-05 | No  | No | Yes | No  | No  | No  | No |
| 670    | BPHL    | biphenyl hydrolase-like (serine hydrolase; breast epithelial mucin-associated antigen)        | 6.58E-05 | No  | No | Yes | No  | No  | No  | No |
| 4502   | MT2A    | metallothionein 2A                                                                            | 6.58E-05 | Yes | No | No  | Yes | No  | No  | No |
| 57720  | GPR107  | G protein-coupled receptor 107                                                                | 6.58E-05 | No  | No | Yes | No  | No  | No  | No |
| 7516   | XRCC2   | X-ray repair complementing defective repair in Chinese hamster cells 2                        | 6.60E-05 | No  | No | No  | Yes | No  | No  | No |
| 9570   | GOSR2   | golgi SNAP receptor complex member 2                                                          | 6.60E-05 | Yes | No | Yes | No  | No  | No  | No |
| 84458  | LCOR    | ligand dependent nuclear receptor corepressor                                                 | 6.62E-05 | No  | No | No  | No  | No  | No  | No |
| 8567   | MADD    | MAP-kinase activating death domain                                                            | 6.63E-05 | No  | No | No  | No  | No  | No  | No |

|        |          |                                                                                 |          |     |     |     |     |     |     |    |
|--------|----------|---------------------------------------------------------------------------------|----------|-----|-----|-----|-----|-----|-----|----|
| 827    | CAPN6    | calpain 6                                                                       | 6.64E-05 | No  | No  | Yes | No  | No  | No  | No |
| 9830   | TRIM14   | tripartite motif-containing 14                                                  | 6.64E-05 | No  | No  | No  | Yes | No  | No  | No |
| 2295   | FOXF2    | forkhead box F2                                                                 | 6.67E-05 | No  | No  | No  | No  | Yes | No  | No |
| 11018  | TMED1    | transmembrane emp24 protein transport domain containing 1                       | 6.67E-05 | No  | No  | No  | No  | Yes | No  | No |
| 8412   | BCAR3    | breast cancer anti-estrogen resistance 3                                        | 6.68E-05 | No  | No  | No  | Yes | No  | No  | No |
| 9446   | GSTO1    | glutathione S-transferase omega 1                                               | 6.69E-05 | No  | No  | Yes | No  | No  | No  | No |
| 79728  | PALB2    | partner and localizer of BRCA2                                                  | 6.71E-05 | No  | No  | Yes | No  | No  | Yes | No |
| 83959  | SLC4A11  | solute carrier family 4, sodium borate transporter, member 11                   | 6.73E-05 | No  | No  | No  | No  | Yes | No  | No |
| 6880   | TAF9     | TAF9 RNA polymerase II, TATA box binding protein (TBP)-associated factor, 32kDa | 6.73E-05 | No  | No  | Yes | No  | No  | No  | No |
| 84516  | DCTN5    | dynactin 5 (p25)                                                                | 6.75E-05 | No  | No  | No  | No  | No  | Yes | No |
| 64089  | SNX16    | sorting nexin 16                                                                | 6.78E-05 | No  | No  | No  | Yes | No  | No  | No |
| 64112  | MOAP1    | modulator of apoptosis 1                                                        | 6.78E-05 | No  | No  | Yes | No  | No  | No  | No |
| 129607 | CMPK2    | cytidine monophosphate (UMP-CMP) kinase 2, mitochondrial                        | 6.78E-05 | No  | No  | No  | Yes | No  | No  | No |
| 79048  | SECISBP2 | SECIS binding protein 2                                                         | 6.79E-05 | No  | No  | Yes | No  | No  | No  | No |
| 64083  | GOLPH3   | golgi phosphoprotein 3 (coat-protein)                                           | 6.79E-05 | No  | No  | Yes | No  | No  | Yes | No |
| 53405  | CLIC5    | chloride intracellular channel 5                                                | 6.79E-05 | No  | No  | No  | No  | No  | No  | No |
| 57602  | USP36    | ubiquitin specific peptidase 36                                                 | 6.79E-05 | No  | No  | Yes | No  | No  | No  | No |
| 284307 | ZIK1     | zinc finger protein interacting with K protein 1 homolog (mouse)                | 6.82E-05 | No  | No  | No  | Yes | No  | No  | No |
| 10948  | STARD3   | STAR-related lipid transfer (START) domain containing 3                         | 6.84E-05 | Yes | No  | No  | Yes | No  | No  | No |
| 6317   | SERPINB3 | serpin peptidase inhibitor, clade B (ovalbumin), member 3                       | 6.84E-05 | No  | No  | No  | No  | No  | No  | No |
| 5520   | PPP2R2A  | protein phosphatase 2 (formerly 2A), regulatory subunit B, alpha isoform        | 6.84E-05 | No  | No  | Yes | No  | No  | Yes | No |
| 93621  | MRFAP1   | Mof4 family associated protein 1                                                | 6.85E-05 | No  | No  | No  | Yes | No  | No  | No |
| 58500  | ZNF250   | zinc finger protein 250                                                         | 6.86E-05 | No  | No  | No  | Yes | No  | No  | No |
| 23041  | MON2     | MON2 homolog (S. cerevisiae)                                                    | 6.88E-05 | No  | No  | No  | Yes | No  | No  | No |
| 4781   | NFIB     | nuclear factor I/B                                                              | 6.89E-05 | Yes | No  | No  | No  | No  | No  | No |
| 79876  | UBA5     | ubiquitin-like modifier activating enzyme 5                                     | 6.89E-05 | No  | No  | Yes | No  | No  | No  | No |
| 29945  | ANAPC4   | anaphase promoting complex subunit 4                                            | 6.89E-05 | No  | No  | Yes | No  | No  | No  | No |
| 404217 | CTXN1    | cortexin 1                                                                      | 6.89E-05 | No  | No  | No  | No  | No  | No  | No |
| 391191 | OR2AK2   | olfactory receptor, family 2, subfamily AK, member 2                            | 6.91E-05 | NA  | No  | No  | No  | No  | No  | No |
| 1760   | DMPK     | dystrophia myotonica-protein kinase                                             | 6.94E-05 | No  | Yes | No  | No  | No  | No  | No |
| 79752  | ZFAND1   | zinc finger, AN1-type domain 1                                                  | 6.94E-05 | No  | No  | No  | Yes | No  | No  | No |
| 92421  | CHMP4C   | chromatin modifying protein 4C                                                  | 6.94E-05 | No  | No  | No  | Yes | No  | No  | No |
| 79567  | FAM65A   | family with sequence similarity 65, member A                                    | 6.95E-05 | Yes | No  | No  | Yes | No  | No  | No |
| 92960  | PEX11G   | peroxisomal biogenesis factor 11 gamma                                          | 6.95E-05 | No  | No  | No  | No  | No  | No  | No |



|        |          |                                                                                                 |          |     |     |     |     |     |     |     |     |
|--------|----------|-------------------------------------------------------------------------------------------------|----------|-----|-----|-----|-----|-----|-----|-----|-----|
| 26820  | SNORD24  | small nucleolar RNA, C/D box 24                                                                 | 6.95E-05 | NA  | No  |
| 219957 | OR9Q2    | olfactory receptor, family 9, subfamily Q, member 2                                             | 6.97E-05 | NA  | No  | No  | No  | Yes | No  | No  | No  |
| 47     | ACLY     | ATP citrate lyase                                                                               | 6.97E-05 | No  | No  | No  | Yes | No  | No  | No  | No  |
| 55326  | AGPAT5   | 1-acylglycerol-3-phosphate O-acyltransferase 5 (lysophosphatidic acid acyltransferase, epsilon) | 6.99E-05 | No  | No  | Yes | No  | No  | Yes | No  | No  |
| 83732  | RIOK1    | RIO kinase 1 (yeast)                                                                            | 7.00E-05 | No  | No  | Yes | No  | No  | No  | No  | No  |
| 3718   | JAK3     | Janus kinase 3 (a protein tyrosine kinase, leukocyte)                                           | 7.01E-05 | Yes | No  | No  | Yes | No  | No  | No  | No  |
| 169966 | FAM46D   | family with sequence similarity 46, member D                                                    | 7.02E-05 | No  | No  | No  | Yes | No  | No  | No  | No  |
| 259295 | TAS2R49  | taste receptor, type 2, member 49                                                               | 7.04E-05 | NA  | No  | Yes | No  | No  | No  | No  | No  |
| 79720  | VPS37B   | vacuolar protein sorting 37 homolog B (S. cerevisiae)                                           | 7.04E-05 | Yes | No  | Yes | No  | No  | No  | No  | No  |
| 90780  | PYGO2    | pygopus homolog 2 (Drosophila)                                                                  | 7.06E-05 | No  | No  | No  | Yes | No  | No  | No  | No  |
| 84897  | TBRG1    | transforming growth factor beta regulator 1                                                     | 7.06E-05 | Yes | No  | Yes | No  | No  | No  | No  | No  |
| 55356  | SLC22A15 | solute carrier family 22, member 15                                                             | 7.08E-05 | No  | No  | No  | Yes | No  | No  | No  | No  |
| 51118  | UTP11L   | UTP11-like, U3 small nucleolar ribonucleoprotein, (yeast)                                       | 7.11E-05 | No  | No  | No  | Yes | No  | No  | No  | No  |
| 28968  | SLC6A16  | solute carrier family 6, member 16                                                              | 7.13E-05 | No  |
| 5080   | PAX6     | paired box 6                                                                                    | 7.14E-05 | No  | No  | Yes | No  | No  | No  | No  | No  |
| 9874   | TLK1     | tousled-like kinase 1                                                                           | 7.16E-05 | Yes | Yes | Yes | No  | No  | No  | No  | No  |
| 9637   | FEZ2     | fasciculation and elongation protein zeta 2 (zyglin II)                                         | 7.20E-05 | No  | No  | Yes | No  | No  | No  | No  | No  |
| 28957  | MRPS28   | mitochondrial ribosomal protein S28                                                             | 7.20E-05 | Yes | No  | Yes | No  | No  | No  | No  | No  |
| 27252  | KLHL20   | kelch-like 20 (Drosophila)                                                                      | 7.20E-05 | Yes | No  | No  | Yes | No  | No  | No  | No  |
| 23092  | ARHGAP26 | Rho GTPase activating protein 26                                                                | 7.21E-05 | No  | No  | No  | Yes | No  | No  | No  | No  |
| 7124   | TNF      | tumor necrosis factor (TNF superfamily, member 2)                                               | 7.21E-05 | No  | No  | No  | Yes | No  | Yes | Yes | Yes |
| 401262 | CRIP3    | cysteine-rich protein 3                                                                         | 7.21E-05 | No  | No  | Yes | No  | No  | No  | No  | No  |
| 3087   | HHEX     | hematopoietically expressed homeobox                                                            | 7.21E-05 | Yes | No  | No  | Yes | No  | No  | No  | No  |
| 25793  | FBXO7    | F-box protein 7                                                                                 | 7.23E-05 | Yes | No  | Yes | No  | No  | No  | No  | No  |
| 152485 | ZNF827   | zinc finger protein 827                                                                         | 7.26E-05 | No  | Yes | Yes | No  | No  | No  | No  | No  |
| 57690  | TNRC6C   | trinucleotide repeat containing 6C                                                              | 7.28E-05 | Yes | No  | Yes | No  | No  | No  | No  | No  |
| 167227 | DCP2     | DCP2 decapping enzyme homolog (S. cerevisiae)                                                   | 7.28E-05 | No  | No  | Yes | No  | No  | No  | No  | No  |
| 341032 | C11orf53 | chromosome 11 open reading frame 53                                                             | 7.30E-05 | Yes | No  | No  | Yes | No  | No  | No  | No  |
| 80342  | TRAF3IP3 | TRAF3 interacting protein 3                                                                     | 7.31E-05 | Yes | Yes | No  | Yes | No  | No  | No  | No  |
| 387837 | CLEC12B  | C-type lectin domain family 12, member B                                                        | 7.34E-05 | No  | No  | Yes | No  | No  | No  | No  | No  |
| 26091  | HERC4    | hect domain and RLD 4                                                                           | 7.35E-05 | No  | No  | Yes | No  | No  | No  | No  | No  |
| 5791   | PTPRE    | protein tyrosine phosphatase, receptor type, E                                                  | 7.35E-05 | Yes | No  | No  | Yes | No  | No  | No  | No  |
| 5876   | RABGGTB  | Rab geranylgeranyltransferase, beta subunit                                                     | 7.36E-05 | Yes | No  | Yes | No  | No  | Yes | No  | No  |
| 221078 | NSUN6    | NOL1/NOP2/Sun domain family, member 6                                                           | 7.37E-05 | No  | No  | Yes | No  | No  | No  | No  | No  |

|        |          |                                                                                         |          |     |     |     |     |     |     |    |
|--------|----------|-----------------------------------------------------------------------------------------|----------|-----|-----|-----|-----|-----|-----|----|
| 221079 | ARL5B    | ADP-ribosylation factor-like 5B                                                         | 7.37E-05 | No  | No  | Yes | No  | No  | No  | No |
| 6227   | RPS21    | ribosomal protein S21                                                                   | 7.37E-05 | No  | No  | No  | No  | No  | No  | No |
| 19     | ABCA1    | ATP-binding cassette, sub-family A (ABC1), member 1                                     | 7.37E-05 | No  | Yes | Yes | No  | No  | No  | No |
| 57505  | AARS2    | alanyl-tRNA synthetase 2, mitochondrial (putative)                                      | 7.37E-05 | Yes | No  | No  | Yes | No  | No  | No |
| 83852  | SETDB2   | SET domain, bifurcated 2                                                                | 7.38E-05 | No  | No  | No  | No  | Yes | No  | No |
| 115352 | FCRL3    | Fc receptor-like 3                                                                      | 7.39E-05 | No  | No  | No  | Yes | No  | No  | No |
| 11275  | KLHL2    | kelch-like 2, Mayven (Drosophila)                                                       | 7.41E-05 | No  | No  | No  | Yes | No  | Yes | No |
| 9265   | PSCD3    | pleckstrin homology, Sec7 and coiled-coil domains 3                                     | 7.44E-05 | No  | No  | Yes | No  | No  | No  | No |
| 3071   | NCKAP1L  | NCK-associated protein 1-like                                                           | 7.44E-05 | Yes | No  | Yes | No  | No  | No  | No |
| 79745  | CLIP4    | CAP-GLY domain containing linker protein family, member 4                               | 7.45E-05 | No  | No  | Yes | No  | No  | No  | No |
| 11245  | GPR176   | G protein-coupled receptor 176                                                          | 7.45E-05 | No  | No  | No  | Yes | No  | No  | No |
| 282890 | ZNF311   | zinc finger protein 311                                                                 | 7.45E-05 | No  | No  | Yes | No  | No  | No  | No |
| 4928   | NUP98    | nucleoporin 98kDa                                                                       | 7.45E-05 | No  | No  | No  | Yes | No  | No  | No |
| 57168  | ASPHD2   | aspartate beta-hydroxylase domain containing 2                                          | 7.49E-05 | No  | No  | No  | Yes | No  | No  | No |
| 26284  | ERAL1    | Era G-protein-like 1 (E. coli)                                                          | 7.50E-05 | No  | No  | No  | Yes | No  | Yes | No |
| 9688   | NUP93    | nucleoporin 93kDa                                                                       | 7.50E-05 | No  | No  | Yes | No  | No  | No  | No |
| 63943  | FKBPL    | FK506 binding protein like                                                              | 7.50E-05 | No  | No  | Yes | No  | No  | No  | No |
| 79556  | ERP1     | endoplasmic reticulum metalloproteinase 1                                               | 7.50E-05 | No  | Yes | Yes | No  | No  | No  | No |
| 90378  | SAMD1    | sterile alpha motif domain containing 1                                                 | 7.51E-05 | No  | No  | No  | Yes | No  | No  | No |
| 23527  | CENTB2   | centaurin, beta 2                                                                       | 7.51E-05 | No  | No  | No  | Yes | No  | No  | No |
| 22992  | FBXL11   | F-box and leucine-rich repeat protein 11                                                | 7.53E-05 | No  | No  | Yes | No  | No  | No  | No |
| 5613   | PRKX     | protein kinase, X-linked                                                                | 7.54E-05 | Yes | No  | No  | Yes | No  | No  | No |
| 26060  | APPL1    | adaptor protein, phosphotyrosine interaction, PH domain and leucine zipper containing 1 | 7.56E-05 | Yes | No  | Yes | No  | No  | No  | No |
| 56945  | MRPS22   | mitochondrial ribosomal protein S22                                                     | 7.57E-05 | Yes | No  | No  | No  | No  | No  | No |
| 163051 | ZNF709   | zinc finger protein 709                                                                 | 7.58E-05 | NA  | No  | No  | Yes | No  | No  | No |
| 58526  | MID1P1   | MID1 interacting protein 1 (gastrulation specific G12 homolog (zebrafish))              | 7.59E-05 | No  | No  | Yes | No  | No  | No  | No |
| 2799   | GNS      | glucosamine (N-acetyl)-6-sulfatase (Sanfilippo disease IIID)                            | 7.60E-05 | Yes | No  | No  | No  | Yes | No  | No |
| 4191   | MDH2     | malate dehydrogenase 2, NAD (mitochondrial)                                             | 7.61E-05 | No  | No  | Yes | No  | No  | No  | No |
| 170692 | ADAMTS18 | ADAM metalloproteinase with thrombospondin type 1 motif, 18                             | 7.62E-05 | No  | No  | Yes | No  | No  | No  | No |
| 5719   | PSMD13   | proteasome (prosome, macropain) 26S subunit, non-ATPase, 13                             | 7.63E-05 | No  | No  | Yes | No  | No  | No  | No |
| 51807  | TUBA8    | tubulin, alpha 8                                                                        | 7.63E-05 | No  | No  | No  | No  | Yes | No  | No |
| 8650   | NUMB     | numb homolog (Drosophila)                                                               | 7.64E-05 | No  | No  | Yes | No  | No  | No  | No |
| 3913   | LAMB2    | laminin, beta 2 (laminin S)                                                             | 7.65E-05 | No  | No  | No  | Yes | No  | No  | No |
| 151449 | GDF7     | growth differentiation factor 7                                                         | 7.66E-05 | NA  | No  | No  | Yes | No  | No  | No |

|        |           |                                                                       |          |     |     |     |     |     |     |     |
|--------|-----------|-----------------------------------------------------------------------|----------|-----|-----|-----|-----|-----|-----|-----|
| 5787   | PTPRB     | protein tyrosine phosphatase, receptor type, B                        | 7.66E-05 | No  | No  | Yes | No  | No  | No  | No  |
| 1964   | EIF1AX    | eukaryotic translation initiation factor 1A, X-linked                 | 7.69E-05 | No  | No  | No  | Yes | No  | No  | No  |
| 494143 | CHAC2     | ChaC, cation transport regulator homolog 2 (E. coli)                  | 7.69E-05 | No  | No  | Yes | No  | No  | No  | No  |
| 23157  | SEPT6     | septin 6                                                              | 7.69E-05 | Yes | No  | No  | No  | No  | No  | No  |
| 6133   | RPL9      | ribosomal protein L9                                                  | 7.69E-05 | No  | No  | No  | Yes | No  | Yes | No  |
| 2845   | GPR22     | G protein-coupled receptor 22                                         | 7.70E-05 | No  | No  | No  | No  | Yes | No  | No  |
| 200539 | ANKRD23   | ankyrin repeat domain 23                                              | 7.70E-05 | Yes | Yes | No  | No  | No  | No  | No  |
| 4929   | NR4A2     | nuclear receptor subfamily 4, group A, member 2                       | 7.74E-05 | Yes | No  | No  | No  | No  | Yes | No  |
| 55699  | IARS2     | isoleucyl-tRNA synthetase 2, mitochondrial                            | 7.74E-05 | No  | No  | Yes | No  | No  | No  | No  |
| 10380  | BPNT1     | 3'(2'), 5'-biphosphate nucleotidase 1                                 | 7.74E-05 | No  | No  | Yes | No  | No  | No  | No  |
| 79970  | ZNF767    | zinc finger family member 767                                         | 7.74E-05 | No  | No  | No  | Yes | No  | No  | No  |
| 692233 | SNORD117  | small nucleolar RNA, C/D box 117                                      | 7.75E-05 | NA  | No  | No  | Yes | No  | No  | No  |
| 55840  | EAF2      | ELL associated factor 2                                               | 7.77E-05 | No  | Yes | Yes | No  | No  | Yes | No  |
| 94120  | SYTL3     | synaptotagmin-like 3                                                  | 7.77E-05 | Yes | No  | No  | Yes | No  | No  | No  |
| 55769  | ZNF83     | zinc finger protein 83                                                | 7.77E-05 | Yes | No  | Yes | No  | No  | Yes | No  |
| 10262  | SF3B4     | splicing factor 3b, subunit 4, 49kDa                                  | 7.77E-05 | No  | No  | Yes | No  | No  | No  | No  |
| 677768 | SCARNA13  | small Cajal body-specific RNA 13                                      | 7.79E-05 | NA  | No  | No  | Yes | No  | No  | No  |
| 5793   | PTPRG     | protein tyrosine phosphatase, receptor type, G                        | 7.79E-05 | Yes | No  | Yes | No  | No  | No  | No  |
| 26013  | L3MBTL    | l(3)mbt-like (Drosophila)                                             | 7.81E-05 | No  | No  | Yes | No  | No  | No  | No  |
| 10157  | AASS      | aminoadipate-semialdehyde synthase                                    | 7.81E-05 | Yes | Yes | Yes | No  | No  | No  | No  |
| 57458  | TMCC3     | transmembrane and coiled-coil domain family 3                         | 7.81E-05 | Yes | Yes | Yes | No  | No  | No  | No  |
| 83452  | RAB33B    | RAB33B, member RAS oncogene family                                    | 7.82E-05 | No  | No  | No  | Yes | No  | Yes | No  |
| 152330 | CNTN4     | contactin 4                                                           | 7.82E-05 | Yes | No  | No  | Yes | No  | No  | No  |
| 23291  | FBXW11    | F-box and WD repeat domain containing 11                              | 7.84E-05 | No  | No  | Yes | No  | No  | Yes | Yes |
| 6173   | RPL36A    | ribosomal protein L36a                                                | 7.84E-05 | No  | No  | Yes | No  | No  | No  | No  |
| 6748   | SSR4      | signal sequence receptor, delta (translocon-associated protein delta) | 7.84E-05 | No  | Yes | No  | Yes | No  | No  | No  |
| 6129   | RPL7      | ribosomal protein L7                                                  | 7.85E-05 | No  | No  | Yes | No  | No  | No  | No  |
| 652968 | LOC652968 | hypothetical protein LOC652968                                        | 7.86E-05 | Yes | No  | No  | Yes | No  | No  | No  |
| 79882  | ZC3H14    | zinc finger CCCH-type containing 14                                   | 7.87E-05 | No  | No  | No  | No  | Yes | No  | No  |
| 7182   | NR2C2     | nuclear receptor subfamily 2, group C, member 2                       | 7.88E-05 | Yes | No  | Yes | No  | No  | No  | No  |
| 10063  | COX17     | COX17 cytochrome c oxidase assembly homolog (S. cerevisiae)           | 7.88E-05 | No  | No  | Yes | No  | No  | Yes | No  |
| 79177  | ZNF576    | zinc finger protein 576                                               | 7.88E-05 | No  | No  | Yes | No  | No  | No  | No  |
| 126298 | IRGQ      | immunity-related GTPase family, Q                                     | 7.88E-05 | No  | No  | Yes | No  | No  | No  | No  |
| 56165  | TDRD1     | tudor domain containing 1                                             | 7.92E-05 | No  |

|        |          |                                                                                   |          |     |    |     |     |     |     |    |
|--------|----------|-----------------------------------------------------------------------------------|----------|-----|----|-----|-----|-----|-----|----|
| 60485  | SAV1     | salvador homolog 1 (Drosophila)                                                   | 7.92E-05 | Yes | No | Yes | No  | No  | No  | No |
| 4331   | MNAT1    | menage a trois homolog 1, cyclin H assembly factor (Xenopus laevis)               | 7.92E-05 | No  | No | No  | Yes | No  | No  | No |
| 8192   | CLPP     | ClpP caseinolytic peptidase, ATP-dependent, proteolytic subunit homolog (E. coli) | 7.95E-05 | No  | No | Yes | No  | No  | No  | No |
| 2519   | FUCA2    | fucosidase, alpha-L-2, plasma                                                     | 7.96E-05 | No  | No | Yes | No  | No  | No  | No |
| 11276  | AP1GBP1  | AP1 gamma subunit binding protein 1                                               | 7.97E-05 | No  | No | Yes | No  | No  | No  | No |
| 9968   | MED12    | mediator complex subunit 12                                                       | 7.98E-05 | Yes | No | No  | Yes | No  | No  | No |
| 3561   | IL2RG    | interleukin 2 receptor, gamma (severe combined immunodeficiency)                  | 7.98E-05 | Yes | No | No  | Yes | No  | No  | No |
| 25932  | CLIC4    | chloride intracellular channel 4                                                  | 8.00E-05 | No  | No | No  | Yes | No  | No  | No |
| 55544  | RBM38    | RNA binding motif protein 38                                                      | 8.02E-05 | No  | No | Yes | No  | No  | No  | No |
| 284004 | HEXDC    | hexosaminidase (glycosyl hydrolase family 20, catalytic domain) containing        | 8.03E-05 | Yes | No | Yes | No  | No  | No  | No |
| 27121  | DKK4     | dickkopf homolog 4 (Xenopus laevis)                                               | 8.04E-05 | No  | No | Yes | No  | No  | No  | No |
| 4660   | PPP1R12B | protein phosphatase 1, regulatory (inhibitor) subunit 12B                         | 8.05E-05 | Yes | No | Yes | No  | No  | No  | No |
| 26996  | GPR160   | G protein-coupled receptor 160                                                    | 8.05E-05 | No  | No | Yes | No  | No  | No  | No |
| 653121 | ZBTB8    | zinc finger and BTB domain containing 8                                           | 8.07E-05 | No  | No | Yes | No  | No  | No  | No |
| 213    | ALB      | albumin                                                                           | 8.07E-05 | No  | No | No  | No  | No  | No  | No |
| 353142 | LCE3A    | late cornified envelope 3A                                                        | 8.12E-05 | NA  | No | No  | Yes | No  | No  | No |
| 26249  | KLHL3    | kelch-like 3 (Drosophila)                                                         | 8.12E-05 | No  | No | Yes | No  | No  | No  | No |
| 67774  | SCARNA1  | small Cajal body-specific RNA 1                                                   | 8.12E-05 | NA  | No | Yes | No  | No  | No  | No |
| 118426 | LOH12CR1 | loss of heterozygosity, 12, chromosomal region 1                                  | 8.12E-05 | No  | No | No  | Yes | No  | Yes | No |
| 55695  | NSUN5    | NOL1/NOP2/Sun domain family, member 5                                             | 8.12E-05 | No  | No | Yes | No  | No  | No  | No |
| 2986   | GUCY2F   | guanylate cyclase 2F, retinal                                                     | 8.12E-05 | No  | No | Yes | No  | No  | No  | No |
| 56256  | SERTAD4  | SERTA domain containing 4                                                         | 8.12E-05 | No  | No | No  | No  | Yes | No  | No |
| 8647   | ABCB11   | ATP-binding cassette, sub-family B (MDR/TAP), member 11                           | 8.15E-05 | No  | No | Yes | No  | No  | No  | No |
| 9038   | TAAR5    | trace amine associated receptor 5                                                 | 8.15E-05 | No  | No | Yes | No  | No  | No  | No |
| 79006  | METRN    | metorin, glial cell differentiation regulator                                     | 8.18E-05 | Yes | No | No  | Yes | No  | No  | No |
| 90933  | TRIM41   | tripartite motif-containing 41                                                    | 8.19E-05 | No  | No | No  | No  | Yes | No  | No |
| 3735   | KARS     | lysyl-tRNA synthetase                                                             | 8.19E-05 | No  | No | Yes | No  | No  | No  | No |
| 55762  | ZNF701   | zinc finger protein 701                                                           | 8.21E-05 | No  | No | Yes | No  | No  | No  | No |
| 9917   | FAM20B   | family with sequence similarity 20, member B                                      | 8.24E-05 | No  | No | Yes | No  | No  | No  | No |
| 4137   | MAPT     | microtubule-associated protein tau                                                | 8.28E-05 | No  | No | No  | No  | No  | No  | No |
| 285267 | ZNF619   | zinc finger protein 619                                                           | 8.28E-05 | No  | No | Yes | No  | No  | No  | No |
| 22889  | KIAA0907 | KIAA0907                                                                          | 8.30E-05 | No  | No | No  | Yes | No  | No  | No |
| 339403 | RXFP4    | relaxin/insulin-like family peptide receptor 4                                    | 8.30E-05 | NA  | No | No  | Yes | No  | No  | No |
| 25976  | TIPARP   | TCDD-inducible poly(ADP-ribose) polymerase                                        | 8.31E-05 | No  | No | Yes | No  | No  | No  | No |

|        |           |                                                                            |          |     |     |     |     |     |     |    |
|--------|-----------|----------------------------------------------------------------------------|----------|-----|-----|-----|-----|-----|-----|----|
| 4524   | MTHFR     | 5,10-methylenetetrahydrofolate reductase (NADPH)                           | 8.31E-05 | Yes | No  | No  | Yes | No  | No  | No |
| 90952  | ESAM      | endothelial cell adhesion molecule                                         | 8.32E-05 | Yes | No  | No  | Yes | No  | No  | No |
| 66008  | TRAK2     | trafficking protein, kinesin binding 2                                     | 8.34E-05 | Yes | No  | No  | Yes | No  | No  | No |
| 7174   | TPP2      | tripeptidyl peptidase II                                                   | 8.36E-05 | No  | No  | Yes | No  | No  | Yes | No |
| 159963 | SLC5A12   | solute carrier family 5 (sodium/glucose cotransporter), member 12          | 8.36E-05 | No  | No  | Yes | No  | No  | No  | No |
| 150244 | ZDHC8P    | zinc finger, DHHC-type containing 8 pseudogene                             | 8.38E-05 | No  | No  | No  | Yes | No  | No  | No |
| 56980  | PRDM10    | PR domain containing 10                                                    | 8.38E-05 | No  | No  | Yes | No  | No  | No  | No |
| 6687   | SPG7      | spastic paraplegia 7 (pure and complicated autosomal recessive)            | 8.38E-05 | Yes | No  | No  | Yes | No  | No  | No |
| 92     | ACVR2A    | activin A receptor, type IIA                                               | 8.39E-05 | No  | No  | Yes | No  | No  | No  | No |
| 6468   | FBXW4     | F-box and WD repeat domain containing 4                                    | 8.40E-05 | No  | No  | No  | No  | Yes | Yes | No |
| 162972 | ZNF550    | zinc finger protein 550                                                    | 8.42E-05 | Yes | No  | Yes | No  | No  | No  | No |
| 64078  | SLC28A3   | solute carrier family 28 (sodium-coupled nucleoside transporter), member 3 | 8.44E-05 | No  | No  | Yes | No  | No  | No  | No |
| 5329   | PLAUR     | plasminogen activator, urokinase receptor                                  | 8.45E-05 | Yes | No  | No  | Yes | No  | No  | No |
| 1939   | LGTN      | ligatin                                                                    | 8.45E-05 | No  | No  | Yes | No  | No  | No  | No |
| 79800  | ALS2CR8   | amyotrophic lateral sclerosis 2 (juvenile) chromosome region, candidate 8  | 8.48E-05 | No  | No  | Yes | No  | No  | No  | No |
| 606    | BCL7A     | B-cell CLL/lymphoma 7A                                                     | 8.48E-05 | No  | Yes | No  | Yes | No  | No  | No |
| 128312 | HIST3H2BB | histone cluster 3, H2bb                                                    | 8.51E-05 | NA  | No  | No  | Yes | No  | No  | No |
| 10392  | NOD1      | nucleotide-binding oligomerization domain containing 1                     | 8.51E-05 | Yes | No  | Yes | No  | No  | No  | No |
| 8634   | RTCD1     | RNA terminal phosphate cyclase domain 1                                    | 8.51E-05 | No  | No  | Yes | No  | No  | Yes | No |
| 79789  | CLMN      | calmin (calponin-like, transmembrane)                                      | 8.53E-05 | Yes | Yes | Yes | No  | No  | No  | No |
| 51056  | LAP3      | leucine aminopeptidase 3                                                   | 8.53E-05 | No  | No  | No  | No  | No  | No  | No |
| 51296  | SLC15A3   | solute carrier family 15, member 3                                         | 8.53E-05 | Yes | No  | Yes | No  | No  | Yes | No |
| 6690   | SPRR1B    | small proline-rich protein 1B (cornalin)                                   | 8.55E-05 | Yes | No  | No  | Yes | No  | No  | No |
| 8876   | VNN1      | vanin 1                                                                    | 8.60E-05 | No  | No  | No  | Yes | No  | No  | No |
| 90075  | ZNF30     | zinc finger protein 30                                                     | 8.61E-05 | No  | No  | No  | Yes | No  | No  | No |
| 2647   | BLOC1S1   | biogenesis of lysosome-related organelles complex-1, subunit 1             | 8.62E-05 | No  | No  | No  | Yes | No  | Yes | No |
| 676    | BRDT      | bromodomain, testis-specific                                               | 8.65E-05 | No  | No  | Yes | No  | No  | No  | No |
| 9177   | HTR3B     | 5-hydroxytryptamine (serotonin) receptor 3B                                | 8.69E-05 | No  | No  | Yes | No  | No  | No  | No |
| 3207   | HOXA11    | homeobox A11                                                               | 8.69E-05 | No  | No  | Yes | No  | No  | No  | No |
| 25901  | CCDC28A   | coiled-coil domain containing 28A                                          | 8.70E-05 | No  | No  | Yes | No  | No  | No  | No |
| 10102  | TSM       | Ts translation elongation factor, mitochondrial                            | 8.70E-05 | No  | No  | No  | Yes | No  | No  | No |
| 9358   | ITGBL1    | integrin, beta-like 1 (with EGF-like repeat domains)                       | 8.70E-05 | Yes | No  | Yes | No  | No  | No  | No |
| 112942 | CCDC104   | coiled-coil domain containing 104                                          | 8.70E-05 | Yes | No  | No  | No  | Yes | Yes | No |
| 677812 | SNORA29   | small nucleolar RNA, H/ACA box 29                                          | 8.70E-05 | NA  | No  | No  | No  | Yes | No  | No |

|        |          |                                                                                                |          |     |     |     |     |     |     |    |
|--------|----------|------------------------------------------------------------------------------------------------|----------|-----|-----|-----|-----|-----|-----|----|
| 348793 | WDR53    | WD repeat domain 53                                                                            | 8.71E-05 | No  | No  | Yes | No  | No  | No  | No |
| 9181   | ARHGEF2  | rho/rac guanine nucleotide exchange factor (GEF) 2                                             | 8.72E-05 | No  | No  | Yes | No  | No  | No  | No |
| 3960   | LGALS4   | lectin, galactoside-binding, soluble, 4 (galectin 4)                                           | 8.72E-05 | No  | No  | No  | Yes | No  | No  | No |
| 83786  | FRMD8    | FERM domain containing 8                                                                       | 8.77E-05 | No  | No  | No  | No  | No  | No  | No |
| 283111 | OR51V1   | olfactory receptor, family 51, subfamily V, member 1                                           | 8.82E-05 | NA  | No  | Yes | No  | No  | No  | No |
| 23499  | MACF1    | microtubule-actin crosslinking factor 1                                                        | 8.82E-05 | Yes | No  | Yes | No  | No  | No  | No |
| 3563   | IL3RA    | interleukin 3 receptor, alpha (low affinity)                                                   | 8.84E-05 | No  | No  | No  | Yes | No  | No  | No |
| 5202   | PFDN2    | prefoldin subunit 2                                                                            | 8.85E-05 | No  | No  | Yes | No  | No  | Yes | No |
| 84678  | FBXL10   | F-box and leucine-rich repeat protein 10                                                       | 8.85E-05 | No  | No  | Yes | No  | No  | No  | No |
| 64208  | POPC3    | poppe domain containing 3                                                                      | 8.91E-05 | No  | No  | Yes | No  | No  | No  | No |
| 79607  | FAM118B  | family with sequence similarity 118, member B                                                  | 8.91E-05 | Yes | No  | Yes | No  | No  | No  | No |
| 9554   | SEC22B   | SEC22 vesicle trafficking protein homolog B (S. cerevisiae)                                    | 8.91E-05 | No  | Yes | Yes | No  | No  | No  | No |
| 53345  | TM6SF2   | transmembrane 6 superfamily member 2                                                           | 8.92E-05 | No  | No  | No  | No  | Yes | No  | No |
| 2550   | GABBR1   | gamma-aminobutyric acid (GABA) B receptor, 1                                                   | 8.92E-05 | Yes | No  | No  | Yes | No  | No  | No |
| 4629   | MYH11    | myosin, heavy chain 11, smooth muscle                                                          | 8.92E-05 | Yes | No  | Yes | No  | No  | No  | No |
| 57696  | DDX55    | DEAD (Asp-Glu-Ala-Asp) box polypeptide 55                                                      | 8.93E-05 | No  | No  | No  | Yes | No  | No  | No |
| 50485  | SMARCAL1 | SWI/SNF related, matrix associated, actin dependent regulator of chromatin, subfamily a-like 1 | 8.94E-05 | Yes | No  | No  | Yes | No  | No  | No |
| 3306   | HSPA2    | heat shock 70kDa protein 2                                                                     | 8.96E-05 | No  | No  | No  | No  | No  | No  | No |
| 4893   | NRAS     | neuroblastoma RAS viral (v-ras) oncogene homolog                                               | 8.97E-05 | No  | Yes | No  | Yes | No  | No  | No |
| 8325   | FZD8     | frizzled homolog 8 (Drosophila)                                                                | 8.99E-05 | Yes | No  | No  | No  | Yes | No  | No |
| 89932  | PAPLN    | papilin, proteoglycan-like sulfated glycoprotein                                               | 9.01E-05 | No  | No  | No  | Yes | No  | No  | No |
| 54556  | ING3     | inhibitor of growth family, member 3                                                           | 9.01E-05 | No  | No  | Yes | No  | No  | No  | No |
| 119682 | OR51L1   | olfactory receptor, family 51, subfamily L, member 1                                           | 9.03E-05 | NA  | No  | Yes | No  | No  | No  | No |
| 54757  | FAM20A   | family with sequence similarity 20, member A                                                   | 9.03E-05 | Yes | No  | No  | No  | No  | No  | No |
| 84269  | CHCHD5   | coiled-coil-helix-coiled-coil-helix domain containing 5                                        | 9.03E-05 | No  | No  | No  | Yes | No  | No  | No |
| 961    | CD47     | CD47 molecule                                                                                  | 9.04E-05 | Yes | No  | No  | Yes | No  | No  | No |
| 10617  | STAMBP   | STAM binding protein                                                                           | 9.05E-05 | No  | No  | Yes | No  | No  | No  | No |
| 11341  | SCRG1    | scrapie responsive protein 1                                                                   | 9.05E-05 | No  | No  | No  | No  | Yes | No  | No |
| 22936  | ELL2     | elongation factor, RNA polymerase II, 2                                                        | 9.07E-05 | Yes | No  | No  | Yes | No  | No  | No |
| 10044  | SH2D3C   | SH2 domain containing 3C                                                                       | 9.07E-05 | Yes | No  | No  | No  | No  | No  | No |
| 1025   | CDK9     | cyclin-dependent kinase 9                                                                      | 9.07E-05 | Yes | No  | No  | No  | No  | No  | No |
| 9219   | MTA2     | metastasis associated 1 family, member 2                                                       | 9.09E-05 | No  | No  | No  | Yes | No  | Yes | No |
| 57191  | VN1R1    | vomer nasal 1 receptor 1                                                                       | 9.10E-05 | No  | No  | No  | Yes | No  | No  | No |
| 121457 | IKIP     | IKK interacting protein                                                                        | 9.11E-05 | Yes | No  | Yes | No  | No  | No  | No |

|        |           |                                                                                        |          |     |     |     |     |     |     |    |
|--------|-----------|----------------------------------------------------------------------------------------|----------|-----|-----|-----|-----|-----|-----|----|
| 84182  | FLJ22374  | hypothetical protein FLJ22374                                                          | 9.12E-05 | No  | No  | No  | Yes | No  | No  | No |
| 695    | BTK       | Bruton agammaglobulinemia tyrosine kinase                                              | 9.15E-05 | No  | No  | Yes | No  | No  | No  | No |
| 60495  | HPSE2     | heparanase 2                                                                           | 9.17E-05 | No  | No  | Yes | No  | No  | No  | No |
| 4170   | MCL1      | myeloid cell leukemia sequence 1 (BCL2-related)                                        | 9.19E-05 | No  | No  | No  | No  | Yes | No  | No |
| 4318   | MMP9      | matrix metalloproteinase 9 (gelatinase B, 92kDa gelatinase, 92kDa type IV collagenase) | 9.23E-05 | No  | No  | No  | Yes | No  | No  | No |
| 27314  | RAB30     | RAB30, member RAS oncogene family                                                      | 9.23E-05 | No  | No  | No  | Yes | No  | Yes | No |
| 9567   | GTPBP1    | GTP binding protein 1                                                                  | 9.24E-05 | Yes | No  | No  | Yes | No  | No  | No |
| 488    | ATP2A2    | ATPase, Ca++ transporting, cardiac muscle, slow twitch 2                               | 9.24E-05 | No  | No  | No  | Yes | No  | No  | No |
| 254013 | MGC50559  | hypothetical protein MGC50559                                                          | 9.24E-05 | Yes | No  | Yes | No  | No  | No  | No |
| 134526 | ACOT12    | acyl-CoA thioesterase 12                                                               | 9.25E-05 | No  | No  | No  | Yes | No  | No  | No |
| 5905   | RANGAP1   | Ran GTPase activating protein 1                                                        | 9.26E-05 | No  | No  | Yes | No  | No  | No  | No |
| 5726   | TAS2R38   | taste receptor, type 2, member 38                                                      | 9.26E-05 | No  | No  | No  | Yes | No  | No  | No |
| 7003   | TEAD1     | TEA domain family member 1 (SV40 transcriptional enhancer factor)                      | 9.26E-05 | No  | No  | Yes | No  | No  | No  | No |
| 84247  | LDCC1L    | leucine zipper, down-regulated in cancer 1-like                                        | 9.29E-05 | Yes | No  | No  | Yes | No  | No  | No |
| 54165  | DCUN1D1   | DCN1, defective in cullin neddylation 1, domain containing 1 (S. cerevisiae)           | 9.31E-05 | No  | No  | No  | No  | Yes | No  | No |
| 4478   | MSN       | moesin                                                                                 | 9.38E-05 | Yes | No  | Yes | No  | No  | No  | No |
| 121355 | GTSF1     | gametocyte specific factor 1                                                           | 9.40E-05 | No  | No  | Yes | No  | No  | No  | No |
| 5555   | PRH2      | proline-rich protein HaellII subfamily 2                                               | 9.40E-05 | NA  | No  | Yes | No  | No  | No  | No |
| 4116   | MAGOH     | mago-nashi homolog, proliferation-associated (Drosophila)                              | 9.40E-05 | No  | No  | No  | Yes | No  | No  | No |
| 29904  | EEF2K     | eukaryotic elongation factor-2 kinase                                                  | 9.42E-05 | Yes | No  | No  | Yes | No  | No  | No |
| 440087 | LOC440087 | Uncharacterized protein LOC440087                                                      | 9.42E-05 | No  | No  | Yes | No  | No  | No  | No |
| 60488  | MRPS35    | mitochondrial ribosomal protein S35                                                    | 9.45E-05 | No  | No  | No  | Yes | No  | No  | No |
| 5364   | PLXNB1    | plexin B1                                                                              | 9.49E-05 | No  | No  | No  | No  | No  | No  | No |
| 84916  | CIRH1A    | cirrhosis, autosomal recessive 1A (cirhin)                                             | 9.51E-05 | No  | No  | Yes | No  | No  | Yes | No |
| 8869   | ST3GAL5   | ST3 beta-galactoside alpha-2,3-sialyltransferase 5                                     | 9.53E-05 | Yes | No  | No  | Yes | No  | No  | No |
| 7478   | WNT8A     | wingless-type MMTV integration site family, member 8A                                  | 9.53E-05 | No  | No  | Yes | No  | No  | No  | No |
| 54760  | PCSK4     | proprotein convertase subtilisin/kexin type 4                                          | 9.54E-05 | No  | No  | No  | Yes | No  | No  | No |
| 4327   | MMP19     | matrix metalloproteinase 19                                                            | 9.56E-05 | Yes | No  | Yes | No  | No  | No  | No |
| 5064   | PALM      | paralemmin                                                                             | 9.57E-05 | No  | No  | No  | No  | No  | No  | No |
| 1962   | EHHADH    | enoyl-Coenzyme A, hydratase/3-hydroxyacyl Coenzyme A dehydrogenase                     | 9.59E-05 | No  | No  | Yes | No  | No  | No  | No |
| 6341   | SCO1      | SCO cytochrome oxidase deficient homolog 1 (yeast)                                     | 9.60E-05 | No  | No  | No  | No  | No  | Yes | No |
| 150350 | ENTHD1    | ENTH domain containing 1                                                               | 9.61E-05 | No  | No  | Yes | No  | No  | No  | No |
| 9402   | GRAP2     | GRB2-related adaptor protein 2                                                         | 9.61E-05 | No  | No  | Yes | No  | No  | No  | No |
| 5191   | PEX7      | peroxisomal biogenesis factor 7                                                        | 9.64E-05 | No  | Yes | Yes | No  | No  | No  | No |

|        |          |                                                                                    |             |     |     |     |     |     |     |    |
|--------|----------|------------------------------------------------------------------------------------|-------------|-----|-----|-----|-----|-----|-----|----|
| 51208  | CLDN18   | claudin 18                                                                         | 9.67E-05    | Yes | No  | Yes | No  | No  | No  | No |
| 116028 | C16orf75 | chromosome 16 open reading frame 75                                                | 9.70E-05    | No  | No  | No  | No  | Yes | No  | No |
| 392636 | TMEM195  | transmembrane protein 195                                                          | 9.71E-05    | NA  | No  | Yes | No  | No  | No  | No |
| 140775 | SMCR8    | Smith-Magenis syndrome chromosome region, candidate 8                              | 9.71E-05    | No  | No  | Yes | No  | No  | No  | No |
| 5328   | PLAU     | plasminogen activator, urokinase                                                   | 9.72E-05    | No  | No  | No  | No  | No  | No  | No |
| 10219  | KLRG1    | killer cell lectin-like receptor subfamily G, member 1                             | 9.72E-05    | No  | No  | No  | Yes | No  | No  | No |
| 3604   | TNFRSF9  | tumor necrosis factor receptor superfamily, member 9                               | 9.73E-05    | No  | No  | Yes | No  | No  | No  | No |
| 90701  | SEC11C   | SEC11 homolog C (S. cerevisiae)                                                    | 9.74E-05    | No  | No  | No  | No  | Yes | No  | No |
| 338596 | ST8SIA6  | ST8 alpha-N-acetyl-neuramide alpha-2,8-sialyltransferase 6                         | 9.76E-05    | NA  | No  | Yes | No  | No  | Yes | No |
| 80329  | ULBP1    | UL16 binding protein 1                                                             | 9.76E-05    | No  | No  | No  | No  | No  | No  | No |
| 9278   | ZBTB22   | zinc finger and BTB domain containing 22                                           | 9.76E-05    | No  | No  | Yes | No  | No  | No  | No |
| 130029 | ALS2CR16 | amyotrophic lateral sclerosis 2 (juvenile) chromosome region, candidate 16         | 9.80E-05    | No  | Yes | Yes | No  | No  | No  | No |
| 7270   | TTF1     | transcription termination factor, RNA polymerase I                                 | 9.81E-05    | No  | No  | Yes | No  | No  | No  | No |
| 27     | ABL2     | v-abl Abelson murine leukemia viral oncogene homolog 2 (arg, Abelson-related gene) | 9.81E-05    | Yes | No  | No  | Yes | No  | No  | No |
| 201283 | FLJ32065 | hypothetical protein FLJ32065                                                      | 9.82E-05    | No  | Yes | Yes | No  | No  | No  | No |
| 51557  | GLULD1   | glutamate-ammonia ligase (glutamine synthetase) domain containing 1                | 9.86E-05    | No  | No  | No  | Yes | No  | No  | No |
| 175    | AGA      | aspartylglucosaminidase                                                            | 9.87E-05    | No  | No  | Yes | No  | No  | Yes | No |
| 50813  | COP9A7   | COP9 constitutive photomorphogenic homolog subunit 7A (Arabidopsis)                | 9.87E-05    | No  | No  | Yes | No  | No  | No  | No |
| 3837   | KPNB1    | karyopherin (importin) beta 1                                                      | 9.87E-05    | No  | No  | Yes | No  | No  | No  | No |
| 5494   | PPM1A    | protein phosphatase 1A (formerly 2C), magnesium-dependent, alpha isoform           | 9.90E-05    | No  | No  | Yes | No  | No  | No  | No |
| 9497   | SLC4A7   | solute carrier family 4, sodium bicarbonate cotransporter, member 7                | 9.91E-05    | Yes | No  | Yes | No  | No  | No  | No |
| 65005  | MRPL9    | mitochondrial ribosomal protein L9                                                 | 9.91E-05    | No  | No  | No  | Yes | No  | No  | No |
| 51686  | OAZ3     | ornithine decarboxylase antizyme 3                                                 | 9.91E-05    | No  | No  | No  | Yes | No  | No  | No |
| 219469 | OR8H1    | olfactory receptor, family 8, subfamily H, member 1                                | 9.94E-05    | NA  | No  | Yes | No  | No  | No  | No |
| 390061 | OR51Q1   | olfactory receptor, family 51, subfamily Q, member 1                               | 9.96E-05    | NA  | No  | Yes | No  | No  | No  | No |
| 6919   | TCEA2    | transcription elongation factor A (SII), 2                                         | 9.97E-05    | No  | No  | No  | Yes | No  | No  | No |
| 347252 | IGFBPL1  | insulin-like growth factor binding protein-like 1                                  | 9.99E-05    | NA  | No  | No  | Yes | No  | No  | No |
| 23170  | TTL12    | tubulin tyrosine ligase-like family, member 12                                     | 0.000100284 | No  | Yes | No  | No  | No  | No  | No |
| 8705   | B3GALT4  | UDP-Gal:betaGlcNAc beta 1,3-galactosyltransferase, polypeptide 4                   | 0.000100297 | Yes | No  | No  | No  | No  | No  | No |
| 10181  | P2RY5    | purinergic receptor P2Y, G-protein coupled, 5                                      | 0.000100529 | Yes | No  | No  | No  | No  | No  | No |
| 9039   | UBA3     | ubiquitin-like modifier activating enzyme 3                                        | 0.000100695 | Yes | No  | No  | No  | No  | No  | No |
| 10230  | NBR2     | neighbor of BRCA1 gene 2                                                           | 0.000100791 | Yes | No  | No  | No  | No  | No  | No |
| 115500 | ZNF501   | zinc finger protein 501                                                            | 0.000100923 | Yes | No  | No  | No  | No  | Yes | No |
| 11173  | ADAMTS7  | ADAM metalloproteinase with thrombospondin type 1 motif, 7                         | 0.000101834 | Yes | No  | No  | No  | No  | No  | No |



|        |          |                                                                   |             |     |     |    |    |    |     |     |    |
|--------|----------|-------------------------------------------------------------------|-------------|-----|-----|----|----|----|-----|-----|----|
| 23195  | MDN1     | MDN1, midasin homolog (yeast)                                     | 0.000102159 | Yes | No  | No | No | No | No  | No  | No |
| 1153   | CIRBP    | cold inducible RNA binding protein                                | 0.000103149 | Yes | No  | No | No | No | Yes | No  | No |
| 8324   | FZD7     | frizzled homolog 7 (Drosophila)                                   | 0.000103193 | No  | Yes | No | No | No | No  | No  | No |
| 54977  | SLC25A38 | solute carrier family 25, member 38                               | 0.000103473 | No  | Yes | No | No | No | No  | No  | No |
| 11132  | CAPN10   | calpain 10                                                        | 0.000104342 | Yes | No  | No | No | No | Yes | No  | No |
| 23341  | DNAJC16  | DnaJ (Hsp40) homolog, subfamily C, member 16                      | 0.000106063 | Yes | No  | No | No | No | No  | No  | No |
| 79874  | RABEP2   | rabaptin, RAB GTPase binding effector protein 2                   | 0.000106344 | Yes | No  | No | No | No | No  | No  | No |
| 3299   | HSF4     | heat shock transcription factor 4                                 | 0.000106533 | Yes | No  | No | No | No | No  | No  | No |
| 9403   | SEPT15   | 15 kDa selenoprotein                                              | 0.000107353 | No  | No  | No | No | No | Yes | No  | No |
| 1636   | ACE      | angiotensin I converting enzyme (peptidyl-dipeptidase A) 1        | 0.000107554 | Yes | No  | No | No | No | No  | No  | No |
| 10061  | ABCF2    | ATP-binding cassette, sub-family F (GCN20), member 2              | 0.000108283 | Yes | No  | No | No | No | No  | No  | No |
| 148811 | PM20D1   | peptidase M20 domain containing 1                                 | 0.000108665 | No  | No  | No | No | No | Yes | No  | No |
| 23256  | SCFD1    | sec1 family domain containing 1                                   | 0.000110001 | Yes | No  | No | No | No | No  | No  | No |
| 91012  | LASS5    | LAG1 homolog, ceramide synthase 5                                 | 0.000110228 | Yes | No  | No | No | No | No  | No  | No |
| 55653  | BCAS4    | breast carcinoma amplified sequence 4                             | 0.000110755 | No  | No  | No | No | No | Yes | No  | No |
| 11272  | PRR4     | proline rich 4 (lacrimal)                                         | 0.000111765 | No  | No  | No | No | No | Yes | No  | No |
| 25865  | PRKD2    | protein kinase D2                                                 | 0.000112929 | Yes | No  | No | No | No | No  | No  | No |
| 9894   | TELO2    | TEL2, telomere maintenance 2, homolog (S. cerevisiae)             | 0.000113043 | No  | No  | No | No | No | Yes | No  | No |
| 8407   | TAGLN2   | transgelin 2                                                      | 0.000113333 | No  | Yes | No | No | No | No  | No  | No |
| 55288  | RHOT1    | ras homolog gene family, member T1                                | 0.000113726 | Yes | No  | No | No | No | No  | No  | No |
| 79608  | RIC3     | resistance to inhibitors of cholinesterase 3 homolog (C. elegans) | 0.000114345 | Yes | No  | No | No | No | No  | No  | No |
| 114799 | ESCO1    | establishment of cohesion 1 homolog 1 (S. cerevisiae)             | 0.000114641 | Yes | No  | No | No | No | No  | No  | No |
| 9205   | ZMYM5    | zinc finger, MYM-type 5                                           | 0.000114864 | No  | No  | No | No | No | Yes | No  | No |
| 57161  | PELI2    | pellino homolog 2 (Drosophila)                                    | 0.000114883 | Yes | No  | No | No | No | No  | No  | No |
| 51027  | BOLA1    | bolA homolog 1 (E. coli)                                          | 0.000116303 | Yes | No  | No | No | No | No  | No  | No |
| 10985  | GCN1L1   | GCN1 general control of amino-acid synthesis 1-like 1 (yeast)     | 0.000116344 | No  | No  | No | No | No | Yes | No  | No |
| 3557   | IL1RN    | interleukin 1 receptor antagonist                                 | 0.000116937 | Yes | No  | No | No | No | No  | No  | No |
| 26040  | SETBP1   | SET binding protein 1                                             | 0.000116943 | Yes | No  | No | No | No | Yes | Yes | No |
| 30812  | SOX8     | SRY (sex determining region Y)-box 8                              | 0.000117682 | Yes | No  | No | No | No | No  | No  | No |
| 64788  | LMF1     | lipase maturation factor 1                                        | 0.000117682 | Yes | No  | No | No | No | No  | No  | No |
| 29907  | SNX15    | sorting nexin 15                                                  | 0.000117857 | No  | No  | No | No | No | Yes | No  | No |
| 11237  | RNF24    | ring finger protein 24                                            | 0.000117936 | Yes | No  | No | No | No | No  | No  | No |
| 9913   | SUPT7L   | suppressor of Ty 7 (S. cerevisiae)-like                           | 0.000118271 | No  | No  | No | No | No | Yes | No  | No |
| 51666  | ASB4     | ankyrin repeat and SOCS box-containing 4                          | 0.000118729 | Yes | No  | No | No | No | No  | No  | No |

|        |         |                                                                                                |             |     |     |    |    |    |     |     |
|--------|---------|------------------------------------------------------------------------------------------------|-------------|-----|-----|----|----|----|-----|-----|
| 10235  | RASGRP2 | RAS guanyl releasing protein 2 (calcium and DAG-regulated)                                     | 0.000118758 | Yes | No  | No | No | No | Yes | Yes |
| 7057   | THBS1   | thrombospondin 1                                                                               | 0.000119489 | Yes | No  | No | No | No | No  | No  |
| 285195 | SLC9A9  | solute carrier family 9 (sodium/hydrogen exchanger), member 9                                  | 0.000119802 | Yes | No  | No | No | No | No  | No  |
| 4175   | MCM6    | minichromosome maintenance complex component 6                                                 | 0.000119829 | No  | Yes | No | No | No | No  | No  |
| 201161 | PRR6    | proline rich 6                                                                                 | 0.000119834 | Yes | No  | No | No | No | No  | No  |
| 83440  | ADPGK   | ADP-dependent glucokinase                                                                      | 0.000119849 | Yes | No  | No | No | No | No  | No  |
| 9220   | TIAF1   | TGFB1-induced anti-apoptotic factor 1                                                          | 0.000120118 | Yes | No  | No | No | No | No  | No  |
| 761    | CA3     | carbonic anhydrase III, muscle specific                                                        | 0.000120431 | Yes | No  | No | No | No | No  | No  |
| 2992   | GYG1    | glycogenin 1                                                                                   | 0.000120447 | Yes | Yes | No | No | No | No  | No  |
| 9546   | APBA3   | amyloid beta (A4) precursor protein-binding, family A, member 3 (X11-like 2)                   | 0.000120723 | Yes | No  | No | No | No | No  | No  |
| 375444 | C5orf34 | chromosome 5 open reading frame 34                                                             | 0.000121698 | No  | No  | No | No | No | Yes | No  |
| 4302   | MLLT6   | myeloid/lymphoid or mixed-lineage leukemia (trithorax homolog, Drosophila); translocated to, 6 | 0.000122353 | Yes | No  | No | No | No | No  | No  |
| 51318  | MRPL35  | mitochondrial ribosomal protein L35                                                            | 0.000122709 | No  | Yes | No | No | No | No  | No  |
| 83480  | PUS3    | pseudouridylylase synthase 3                                                                   | 0.000123957 | Yes | Yes | No | No | No | No  | No  |
| 64764  | CREB3L2 | cAMP responsive element binding protein 3-like 2                                               | 0.000124375 | Yes | No  | No | No | No | No  | No  |
| 9470   | EIF4E2  | eukaryotic translation initiation factor 4E family member 2                                    | 0.000124422 | No  | Yes | No | No | No | Yes | No  |
| 113829 | SLC35A4 | solute carrier family 35, member A4                                                            | 0.000125335 | No  | No  | No | No | No | Yes | No  |
| 152100 | CMC1    | COX assembly mitochondrial protein homolog (S. cerevisiae)                                     | 0.000125353 | Yes | No  | No | No | No | No  | No  |
| 8976   | WASL    | Wiskott-Aldrich syndrome-like                                                                  | 0.000127112 | No  | Yes | No | No | No | No  | No  |
| 5616   | PRKY    | protein kinase, Y-linked                                                                       | 0.000127239 | Yes | No  | No | No | No | No  | No  |
| 123606 | NIPA1   | non imprinted in Prader-Willi/Angelman syndrome 1                                              | 0.000128334 | Yes | No  | No | No | No | No  | No  |
| 6899   | TBX1    | T-box 1                                                                                        | 0.000128677 | Yes | No  | No | No | No | No  | No  |
| 389170 | LEKR1   | leucine, glutamate and lysine rich 1                                                           | 0.000128695 | NA  | No  | No | No | No | Yes | No  |
| 55819  | RNF130  | ring finger protein 130                                                                        | 0.000129146 | Yes | No  | No | No | No | No  | No  |
| 399687 | MYO18A  | myosin XVIII A                                                                                 | 0.000130491 | Yes | No  | No | No | No | No  | No  |
| 23258  | RAB6IP1 | RAB6 interacting protein 1                                                                     | 0.000131183 | Yes | No  | No | No | No | No  | No  |
| 27115  | PDE7B   | phosphodiesterase 7B                                                                           | 0.000131527 | Yes | No  | No | No | No | No  | No  |
| 55124  | PIWIL2  | piwi-like 2 (Drosophila)                                                                       | 0.00013174  | Yes | No  | No | No | No | No  | No  |
| 90268  | FAM105B | family with sequence similarity 105, member B                                                  | 0.000131975 | No  | Yes | No | No | No | No  | No  |
| 6352   | CCL5    | chemokine (C-C motif) ligand 5                                                                 | 0.000132262 | Yes | No  | No | No | No | No  | No  |
| 150684 | COMMD1  | copper metabolism (Murr1) domain containing 1                                                  | 0.000133415 | Yes | No  | No | No | No | No  | No  |
| 7390   | UROS    | uroporphyrinogen III synthase (congenital erythropoietic porphyria)                            | 0.000133459 | No  | No  | No | No | No | Yes | No  |
| 199746 | U2AF1L4 | U2 small nuclear RNA auxiliary factor 1-like 4                                                 | 0.000133935 | Yes | No  | No | No | No | No  | No  |
| 1209   | CLPTM1  | cleft lip and palate associated transmembrane protein 1                                        | 0.000134089 | No  | No  | No | No | No | Yes | No  |

|        |         |                                                                                                   |             |     |    |    |    |    |     |    |    |
|--------|---------|---------------------------------------------------------------------------------------------------|-------------|-----|----|----|----|----|-----|----|----|
| 351    | APP     | amyloid beta (A4) precursor protein (peptidase nexin-II, Alzheimer disease)                       | 0.000134357 | Yes | No | No | No | No | No  | No | No |
| 3631   | INPP4A  | inositol polyphosphate-4-phosphatase, type I, 107kDa                                              | 0.000134382 | Yes | No | No | No | No | No  | No | No |
| 53342  | IL17D   | interleukin 17D                                                                                   | 0.000134631 | Yes | No | No | No | No | No  | No | No |
| 6594   | SMARCA1 | SWI/SNF related, matrix associated, actin dependent regulator of chromatin, subfamily a, member 1 | 0.000134974 | Yes | No | No | No | No | No  | No | No |
| 1508   | CTSB    | cathepsin B                                                                                       | 0.000134979 | Yes | No | No | No | No | No  | No | No |
| 1396   | CRIP1   | cysteine-rich protein 1 (intestinal)                                                              | 0.000135388 | Yes | No | No | No | No | No  | No | No |
| 6542   | SLC7A2  | solute carrier family 7 (cationic amino acid transporter, y+ system), member 2                    | 0.00013644  | Yes | No | No | No | No | No  | No | No |
| 8744   | TNFSF9  | tumor necrosis factor (ligand) superfamily, member 9                                              | 0.000137532 | No  | No | No | No | No | Yes | No | No |
| 6442   | SGCA    | sarcoglycan, alpha (50kDa dystrophin-associated glycoprotein)                                     | 0.000138072 | Yes | No | No | No | No | No  | No | No |
| 6229   | RPS24   | ribosomal protein S24                                                                             | 0.000138163 | Yes | No | No | No | No | No  | No | No |
| 26053  | AUTS2   | autism susceptibility candidate 2                                                                 | 0.000138258 | Yes | No | No | No | No | No  | No | No |
| 79026  | AHNAK   | AHNAK nucleoprotein                                                                               | 0.000138506 | Yes | No | No | No | No | No  | No | No |
| 6515   | SLC2A3  | solute carrier family 2 (facilitated glucose transporter), member 3                               | 0.000138645 | Yes | No | No | No | No | No  | No | No |
| 51678  | MPP6    | membrane protein, palmitoylated 6 (MAGUK p55 subfamily member 6)                                  | 0.000138824 | No  | No | No | No | No | Yes | No | No |
| 132    | ADK     | adenosine kinase                                                                                  | 0.000140458 | Yes | No | No | No | No | No  | No | No |
| 374786 | EFCAB5  | EF-hand calcium binding domain 5                                                                  | 0.000141525 | Yes | No | No | No | No | No  | No | No |
| 2852   | GP1R    | G protein-coupled estrogen receptor 1                                                             | 0.00014283  | No  | No | No | No | No | Yes | No | No |
| 9918   | NCAPD2  | non-SMC condensin I complex, subunit D2                                                           | 0.000143087 | No  | No | No | No | No | Yes | No | No |
| 115825 | WDFY2   | WD repeat and FYVE domain containing 2                                                            | 0.000144245 | Yes | No | No | No | No | Yes | No | No |
| 92014  | MCART1  | mitochondrial carrier triple repeat 1                                                             | 0.000144251 | NA  | No | No | No | No | Yes | No | No |
| 140885 | SIRPA   | signal-regulatory protein alpha                                                                   | 0.000144425 | Yes | No | No | No | No | No  | No | No |
| 27348  | TOR1B   | torsin family 1, member B (torsin B)                                                              | 0.000145877 | Yes | No | No | No | No | No  | No | No |
| 84953  | MICALCL | MICAL C-terminal like                                                                             | 0.000146516 | Yes | No | No | No | No | No  | No | No |
| 114804 | RNF157  | ring finger protein 157                                                                           | 0.000148714 | Yes | No | No | No | No | No  | No | No |
| 25897  | RNF19A  | ring finger protein 19A                                                                           | 0.000148824 | Yes | No | No | No | No | No  | No | No |
| 9774   | BCLAF1  | BCL2-associated transcription factor 1                                                            | 0.000148987 | Yes | No | No | No | No | No  | No | No |
| 51322  | WAC     | WW domain containing adaptor with coiled-coil                                                     | 0.000149214 | Yes | No | No | No | No | No  | No | No |
| 56913  | C1GALT1 | core 1 synthase, glycoprotein-N-acetylgalactosamine 3-beta-galactosyltransferase, 1               | 0.000151064 | Yes | No | No | No | No | No  | No | No |
| 7474   | WNT5A   | wingless-type MMTV integration site family, member 5A                                             | 0.00015109  | No  | No | No | No | No | Yes | No | No |
| 7204   | TRIO    | triple functional domain (PTPRF interacting)                                                      | 0.000151197 | Yes | No | No | No | No | No  | No | No |
| 342908 | ZNF404  | zinc finger protein 404                                                                           | 0.00015126  | Yes | No | No | No | No | No  | No | No |
| 79772  | MCTP1   | multiple C2 domains, transmembrane 1                                                              | 0.000151872 | Yes | No | No | No | No | No  | No | No |
| 4065   | LY75    | lymphocyte antigen 75                                                                             | 0.000152123 | Yes | No | No | No | No | No  | No | No |
| 8076   | MFAP5   | microfibrillar associated protein 5                                                               | 0.000153091 | Yes | No | No | No | No | No  | No | No |

|        |          |                                                                                       |             |     |     |    |    |    |     |    |
|--------|----------|---------------------------------------------------------------------------------------|-------------|-----|-----|----|----|----|-----|----|
| 59274  | MESDC1   | mesoderm development candidate 1                                                      | 0.000153316 | No  | No  | No | No | No | Yes | No |
| 91404  | SESTD1   | SEC14 and spectrin domains 1                                                          | 0.000153805 | Yes | No  | No | No | No | Yes | No |
| 2197   | FAU      | Finkel-Biskis-Reilly murine sarcoma virus (FBR-MuSV) ubiquitously expressed           | 0.000156228 | No  | No  | No | No | No | Yes | No |
| 94134  | ARHGAP12 | Rho GTPase activating protein 12                                                      | 0.000156241 | Yes | No  | No | No | No | No  | No |
| 57704  | GBA2     | glucosidase, beta (bile acid) 2                                                       | 0.000157876 | Yes | No  | No | No | No | No  | No |
| 81832  | NETO1    | neuropilin (NRP) and tolloid (TLL)-like 1                                             | 0.000158455 | Yes | No  | No | No | No | No  | No |
| 9046   | DOK2     | docking protein 2, 56kDa                                                              | 0.000158632 | Yes | No  | No | No | No | No  | No |
| 4308   | TRPM1    | transient receptor potential cation channel, subfamily M, member 1                    | 0.00015888  | Yes | No  | No | No | No | No  | No |
| 54941  | RNF125   | ring finger protein 125                                                               | 0.000159237 | Yes | No  | No | No | No | No  | No |
| 3480   | IGF1R    | insulin-like growth factor 1 receptor                                                 | 0.000159241 | Yes | No  | No | No | No | No  | No |
| 51095  | TRNT1    | tRNA nucleotidyl transferase, CCA-adding, 1                                           | 0.000159647 | Yes | No  | No | No | No | No  | No |
| 30009  | TBX21    | T-box 21                                                                              | 0.000159745 | Yes | No  | No | No | No | No  | No |
| 9440   | MED17    | mediator complex subunit 17                                                           | 0.000159788 | No  | No  | No | No | No | Yes | No |
| 23484  | LEPROTL1 | leptin receptor overlapping transcript-like 1                                         | 0.000160308 | Yes | No  | No | No | No | No  | No |
| 26133  | TRPC4AP  | transient receptor potential cation channel, subfamily C, member 4 associated protein | 0.000161138 | No  | Yes | No | No | No | No  | No |
| 64780  | MICAL1   | microtubule associated monooxygenase, calponin and LIM domain containing 1            | 0.000162674 | Yes | No  | No | No | No | Yes | No |
| 6487   | ST3GAL3  | ST3 beta-galactoside alpha-2,3-sialyltransferase 3                                    | 0.000163409 | Yes | No  | No | No | No | No  | No |
| 4860   | NP       | nucleoside phosphorylase                                                              | 0.000163729 | Yes | No  | No | No | No | No  | No |
| 5782   | PTPN12   | protein tyrosine phosphatase, non-receptor type 12                                    | 0.000163833 | Yes | Yes | No | No | No | No  | No |
| 140739 | UBE2F    | ubiquitin-conjugating enzyme E2F (putative)                                           | 0.000163845 | Yes | No  | No | No | No | No  | No |
| 144402 | CPNE8    | copine VIII                                                                           | 0.000163941 | Yes | No  | No | No | No | No  | No |
| 4642   | MYO1D    | myosin ID                                                                             | 0.000164739 | No  | Yes | No | No | No | No  | No |
| 26118  | WSB1     | WD repeat and SOCS box-containing 1                                                   | 0.000164994 | Yes | No  | No | No | No | No  | No |
| 84433  | CARD11   | caspase recruitment domain family, member 11                                          | 0.000165685 | No  | Yes | No | No | No | No  | No |
| 81628  | TSC22D4  | TSC22 domain family, member 4                                                         | 0.000165692 | Yes | No  | No | No | No | No  | No |
| 400673 | VMAC     | vimentin-type IF-associated coiled-coil protein                                       | 0.000166214 | NA  | No  | No | No | No | Yes | No |
| 8439   | NSMAF    | neutral sphingomyelinase (N-SMase) activation associated factor                       | 0.000168085 | Yes | No  | No | No | No | No  | No |
| 223    | ALDH9A1  | aldehyde dehydrogenase 9 family, member A1                                            | 0.000169644 | Yes | Yes | No | No | No | No  | No |
| 1278   | COL1A2   | collagen, type I, alpha 2                                                             | 0.000172192 | Yes | No  | No | No | No | No  | No |
| 958    | CD40     | CD40 molecule, TNF receptor superfamily member 5                                      | 0.000172341 | No  | Yes | No | No | No | No  | No |
| 832    | CAPZB    | capping protein (actin filament) muscle Z-line, beta                                  | 0.000172384 | Yes | No  | No | No | No | No  | No |
| 2119   | ETV5     | ets variant gene 5 (ets-related molecule)                                             | 0.000172522 | No  | No  | No | No | No | Yes | No |
| 9770   | RASSF2   | Ras association (RalGDS/AF-6) domain family member 2                                  | 0.000173904 | Yes | No  | No | No | No | No  | No |
| 253738 | EBF3     | early B-cell factor 3                                                                 | 0.000173999 | Yes | No  | No | No | No | No  | No |

|        |          |                                                                                                                                                                                              |             |     |     |    |    |    |     |     |     |
|--------|----------|----------------------------------------------------------------------------------------------------------------------------------------------------------------------------------------------|-------------|-----|-----|----|----|----|-----|-----|-----|
| 85378  | TUBGCP6  | tubulin, gamma complex associated protein 6                                                                                                                                                  | 0.000175861 | Yes | No  | No | No | No | No  | No  | No  |
| 4836   | NMT1     | N-myristoyltransferase 1                                                                                                                                                                     | 0.000178026 | Yes | No  | No | No | No | No  | No  | No  |
| 4747   | NEFL     | neurofilament, light polypeptide 68kDa                                                                                                                                                       | 0.000178803 | No  | Yes | No | No | No | No  | No  | No  |
| 5307   | PITX1    | paired-like homeodomain 1                                                                                                                                                                    | 0.000179374 | Yes | No  | No | No | No | No  | No  | No  |
| 22856  | CHSY1    | chondroitin sulfate synthase 1                                                                                                                                                               | 0.000179769 | Yes | No  | No | No | No | No  | No  | No  |
| 84803  | AGPAT9   | 1-acylglycerol-3-phosphate O-acyltransferase 9                                                                                                                                               | 0.000180718 | Yes | No  | No | No | No | No  | No  | No  |
| 83479  | DDX59    | DEAD (Asp-Glu-Ala-Asp) box polypeptide 59                                                                                                                                                    | 0.000180816 | Yes | No  | No | No | No | Yes | No  | No  |
| 64802  | NMNAT1   | nicotinamide nucleotide adenylyltransferase 1                                                                                                                                                | 0.000181874 | No  | No  | No | No | No | Yes | No  | No  |
| 84328  | LZIC     | leucine zipper and CTNBP1 domain containing                                                                                                                                                  | 0.000181874 | No  | No  | No | No | No | Yes | No  | No  |
| 9933   | KIAA0020 | KIAA0020                                                                                                                                                                                     | 0.000182206 | Yes | No  | No | No | No | No  | No  | No  |
| 55340  | GIMAP5   | GTPase, IMAP family member 5                                                                                                                                                                 | 0.000182233 | Yes | No  | No | No | No | No  | No  | No  |
| 57396  | CLK4     | CDC-like kinase 4                                                                                                                                                                            | 0.000182686 | Yes | No  | No | No | No | No  | No  | No  |
| 8463   | TEAD2    | TEA domain family member 2                                                                                                                                                                   | 0.000183428 | Yes | No  | No | No | No | No  | No  | No  |
| 1644   | DDC      | dopa decarboxylase (aromatic L-amino acid decarboxylase)                                                                                                                                     | 0.000183831 | Yes | No  | No | No | No | No  | No  | No  |
| 9525   | VPS4B    | vacuolar protein sorting 4 homolog B (S. cerevisiae)                                                                                                                                         | 0.000184404 | No  | No  | No | No | No | Yes | No  | No  |
| 54511  | HMGCLL1  | 3-hydroxymethyl-3-methylglutaryl-Coenzyme A lyase-like 1                                                                                                                                     | 0.000187975 | Yes | No  | No | No | No | No  | No  | No  |
| 326624 | RAB37    | RAB37, member RAS oncogene family                                                                                                                                                            | 0.000188189 | Yes | No  | No | No | No | No  | No  | No  |
| 10197  | PSME3    | proteasome (prosome, macropain) activator subunit 3 (PA28 gamma; K)                                                                                                                          | 0.000188432 | No  | No  | No | No | No | Yes | No  | No  |
| 266553 | OFCC1    | orofacial cleft 1 candidate 1                                                                                                                                                                | 0.000188789 | Yes | No  | No | No | No | No  | No  | No  |
| 5529   | PPP2R5E  | protein phosphatase 2, regulatory subunit B, epsilon isoform                                                                                                                                 | 0.000190107 | Yes | Yes | No | No | No | No  | No  | No  |
| 8503   | PIK3R3   | phosphoinositide-3-kinase, regulatory subunit 3 (gamma)                                                                                                                                      | 0.000190682 | No  | No  | No | No | No | Yes | No  | No  |
| 166815 | TIGD2    | tigger transposable element derived 2                                                                                                                                                        | 0.000192543 | No  | No  | No | No | No | Yes | No  | No  |
| 11009  | IL24     | interleukin 24                                                                                                                                                                               | 0.000192564 | Yes | No  | No | No | No | Yes | Yes | Yes |
| 151556 | GPR155   | G protein-coupled receptor 155                                                                                                                                                               | 0.000192761 | Yes | No  | No | No | No | No  | No  | No  |
| 56105  | PCDHGA11 | protocadherin gamma subfamily A, 11                                                                                                                                                          | 0.000192799 | No  | Yes | No | No | No | No  | No  | No  |
| 79982  | DNAJB14  | DnaJ (Hsp40) homolog, subfamily B, member 14                                                                                                                                                 | 0.000193304 | Yes | No  | No | No | No | No  | No  | No  |
| 51177  | PLEKHO1  | pleckstrin homology domain containing, family O member 1                                                                                                                                     | 0.000194097 | Yes | No  | No | No | No | No  | No  | No  |
| 10938  | EHD1     | EH-domain containing 1                                                                                                                                                                       | 0.000194478 | No  | No  | No | No | No | Yes | No  | No  |
| 2263   | FGFR2    | fibroblast growth factor receptor 2 (bacteria-expressed kinase, keratinocyte growth factor receptor, craniofacial dysostosis 1, Crouzon syndrome, Pfeiffer syndrome, Jackson-Weiss syndrome) | 0.000195072 | Yes | No  | No | No | No | No  | No  | No  |
| 54790  | TET2     | tet oncogene family member 2                                                                                                                                                                 | 0.000195136 | Yes | Yes | No | No | No | No  | No  | No  |
| 6792   | CDKL5    | cyclin-dependent kinase-like 5                                                                                                                                                               | 0.000196312 | Yes | No  | No | No | No | No  | No  | No  |
| 8828   | NRP2     | neuropilin 2                                                                                                                                                                                 | 0.000196999 | Yes | No  | No | No | No | No  | No  | No  |
| 200728 | TMEM17   | transmembrane protein 17                                                                                                                                                                     | 0.000197184 | Yes | No  | No | No | No | No  | No  | No  |
| 1453   | CSNK1D   | casein kinase 1, delta                                                                                                                                                                       | 0.000197701 | Yes | No  | No | No | No | No  | No  | No  |

|        |          |                                                                                                   |             |     |     |    |    |    |     |    |    |
|--------|----------|---------------------------------------------------------------------------------------------------|-------------|-----|-----|----|----|----|-----|----|----|
| 51122  | COMMD2   | COMM domain containing 2                                                                          | 0.000198603 | No  | Yes | No | No | No | No  | No | No |
| 84650  | EBPL     | emopamil binding protein-like                                                                     | 0.000198618 | Yes | No  | No | No | No | No  | No | No |
| 6595   | SMARCA2  | SWI/SNF related, matrix associated, actin dependent regulator of chromatin, subfamily a, member 2 | 0.000199166 | Yes | No  | No | No | No | No  | No | No |
| 57560  | IFT80    | intraflagellar transport 80 homolog (Chlamydomonas)                                               | 0.00020004  | No  | Yes | No | No | No | No  | No | No |
| 126792 | B3GALT6  | UDP-Gal:betaGal beta 1,3-galactosyltransferase polypeptide 6                                      | 0.000200966 | Yes | No  | No | No | No | No  | No | No |
| 83551  | TAAR8    | trace amine associated receptor 8                                                                 | 0.000201459 | No  | Yes | No | No | No | No  | No | No |
| 201292 | TRIM65   | tripartite motif-containing 65                                                                    | 0.000201746 | Yes | No  | No | No | No | No  | No | No |
| 54869  | EPS8L1   | EPS8-like 1                                                                                       | 0.000201747 | Yes | No  | No | No | No | No  | No | No |
| 64840  | PORCN    | porcupine homolog (Drosophila)                                                                    | 0.000202088 | Yes | Yes | No | No | No | Yes | No | No |
| 84939  | MUM1     | melanoma associated antigen (mutated) 1                                                           | 0.000206966 | Yes | No  | No | No | No | No  | No | No |
| 9642   | DCHS1    | dachsous 1 (Drosophila)                                                                           | 0.000207528 | Yes | No  | No | No | No | No  | No | No |
| 10947  | AP3M2    | adaptor-related protein complex 3, mu 2 subunit                                                   | 0.00020785  | Yes | No  | No | No | No | No  | No | No |
| 10077  | TSPAN32  | tetraspanin 32                                                                                    | 0.000208474 | Yes | No  | No | No | No | No  | No | No |
| 55201  | MAP1S    | microtubule-associated protein 1S                                                                 | 0.000208715 | No  | Yes | No | No | No | No  | No | No |
| 6648   | SOD2     | superoxide dismutase 2, mitochondrial                                                             | 0.000209641 | Yes | No  | No | No | No | No  | No | No |
| 57094  | CPA6     | carboxypeptidase A6                                                                               | 0.000210015 | Yes | No  | No | No | No | No  | No | No |
| 11142  | PKIG     | protein kinase (cAMP-dependent, catalytic) inhibitor gamma                                        | 0.000211256 | Yes | No  | No | No | No | No  | No | No |
| 55553  | SOX6     | SRY (sex determining region Y)-box 6                                                              | 0.000211401 | Yes | No  | No | No | No | No  | No | No |
| 151888 | BTLA     | B and T lymphocyte associated                                                                     | 0.000212433 | Yes | Yes | No | No | No | No  | No | No |
| 56144  | PCDHA4   | protocadherin alpha 4                                                                             | 0.000213492 | Yes | No  | No | No | No | No  | No | No |
| 10580  | SORBS1   | sorbin and SH3 domain containing 1                                                                | 0.000213786 | Yes | No  | No | No | No | No  | No | No |
| 4744   | NEFH     | neurofilament, heavy polypeptide 200kDa                                                           | 0.000215166 | No  | Yes | No | No | No | No  | No | No |
| 64418  | TMEM168  | transmembrane protein 168                                                                         | 0.000215424 | Yes | No  | No | No | No | Yes | No | No |
| 103910 | MRLC2    | myosin regulatory light chain MRLC2                                                               | 0.000215672 | Yes | No  | No | No | No | Yes | No | No |
| 170394 | PWWP2B   | PWWP domain containing 2B                                                                         | 0.000216021 | Yes | No  | No | No | No | No  | No | No |
| 51195  | RAPGEFL1 | Rap guanine nucleotide exchange factor (GEF)-like 1                                               | 0.00021612  | Yes | No  | No | No | No | No  | No | No |
| 5973   | REBP     | renin binding protein                                                                             | 0.000217136 | Yes | No  | No | No | No | No  | No | No |
| 10618  | TGOLN2   | trans-golgi network protein 2                                                                     | 0.000218285 | Yes | No  | No | No | No | No  | No | No |
| 54900  | LAX1     | lymphocyte transmembrane adaptor 1                                                                | 0.000218615 | Yes | No  | No | No | No | No  | No | No |
| 2591   | GALNT3   | UDP-N-acetyl-alpha-D-galactosamine:polypeptide N-acetylgalactosaminyltransferase 3 (GalNAc-T3)    | 0.000218655 | Yes | No  | No | No | No | No  | No | No |
| 10884  | MRPS30   | mitochondrial ribosomal protein S30                                                               | 0.000219323 | Yes | No  | No | No | No | No  | No | No |
| 2277   | FIGF     | c-fos induced growth factor (vascular endothelial growth factor D)                                | 0.000220626 | No  | Yes | No | No | No | No  | No | No |
| 3875   | KRT18    | keratin 18                                                                                        | 0.00022146  | Yes | No  | No | No | No | No  | No | No |
| 2531   | KDSR     | 3-ketodihydroshingosine reductase                                                                 | 0.000221921 | Yes | No  | No | No | No | No  | No | No |

|        |           |                                                                                  |             |     |     |    |    |    |    |     |     |
|--------|-----------|----------------------------------------------------------------------------------|-------------|-----|-----|----|----|----|----|-----|-----|
| 3241   | HPCAL1    | hippocalcin-like 1                                                               | 0.000222174 | Yes | No  | No | No | No | No | Yes | Yes |
| 23242  | COBL      | cordon-bleu homolog (mouse)                                                      | 0.000222175 | Yes | No  | No | No | No | No | No  | No  |
| 441108 | LOC441108 | hypothetical gene supported by AK128882                                          | 0.000222386 | Yes | No  | No | No | No | No | No  | No  |
| 134957 | STXBP5    | syntaxin binding protein 5 (tomosyn)                                             | 0.000223424 | Yes | No  | No | No | No | No | Yes | No  |
| 9467   | SH3BP5    | SH3-domain binding protein 5 (BTK-associated)                                    | 0.000224464 | Yes | No  | No | No | No | No | No  | No  |
| 210    | ALAD      | aminolevulinic acid, delta-, dehydratase                                         | 0.000224764 | Yes | No  | No | No | No | No | No  | No  |
| 7008   | TEF       | thyrotrophic embryonic factor                                                    | 0.000225243 | Yes | No  | No | No | No | No | No  | No  |
| 84667  | HES7      | hairy and enhancer of split 7 (Drosophila)                                       | 0.000226376 | No  | No  | No | No | No | No | Yes | No  |
| 9209   | LRRFIP2   | leucine rich repeat (in FLII) interacting protein 2                              | 0.000227115 | No  | Yes | No | No | No | No | No  | No  |
| 9823   | ARMCX2    | armadillo repeat containing, X-linked 2                                          | 0.000227436 | Yes | No  | No | No | No | No | No  | No  |
| 23645  | PPP1R15A  | protein phosphatase 1, regulatory (inhibitor) subunit 15A                        | 0.000228295 | Yes | No  | No | No | No | No | Yes | No  |
| 114781 | BTBD9     | BTB (POZ) domain containing 9                                                    | 0.000229727 | Yes | No  | No | No | No | No | No  | No  |
| 4146   | MATN1     | matrilin 1, cartilage matrix protein                                             | 0.000230226 | Yes | No  | No | No | No | No | No  | No  |
| 79092  | CARD14    | caspase recruitment domain family, member 14                                     | 0.000231308 | Yes | No  | No | No | No | No | No  | No  |
| 2670   | GFAP      | glial fibrillary acidic protein                                                  | 0.000232348 | Yes | No  | No | No | No | No | No  | No  |
| 90809  | TMEM55B   | transmembrane protein 55B                                                        | 0.000232771 | Yes | No  | No | No | No | No | No  | No  |
| 27295  | PDLIM3    | PDZ and LIM domain 3                                                             | 0.000233704 | Yes | No  | No | No | No | No | No  | No  |
| 116988 | CENTG3    | centaurin, gamma 3                                                               | 0.000234101 | Yes | No  | No | No | No | No | No  | No  |
| 375387 | LRRC33    | leucine rich repeat containing 33                                                | 0.000234826 | Yes | Yes | No | No | No | No | Yes | No  |
| 3673   | ITGA2     | integrin, alpha 2 (CD49B, alpha 2 subunit of VLA-2 receptor)                     | 0.00023518  | Yes | No  | No | No | No | No | No  | No  |
| 9778   | KIAA0232  | KIAA0232                                                                         | 0.000236215 | Yes | No  | No | No | No | No | No  | No  |
| 23199  | KIAA0182  | KIAA0182                                                                         | 0.000236354 | Yes | No  | No | No | No | No | No  | No  |
| 9543   | PUNC      | putative neuronal cell adhesion molecule                                         | 0.000236722 | No  | Yes | No | No | No | No | No  | No  |
| 6881   | TAF10     | TAF10 RNA polymerase II, TATA box binding protein (TBP)-associated factor, 30kDa | 0.000236848 | No  | No  | No | No | No | No | Yes | Yes |
| 1032   | CDKN2D    | cyclin-dependent kinase inhibitor 2D (p19, inhibits CDK4)                        | 0.000237667 | Yes | No  | No | No | No | No | No  | No  |
| 6452   | SH3BP2    | SH3-domain binding protein 2                                                     | 0.000237938 | Yes | No  | No | No | No | No | No  | No  |
| 5355   | PLP2      | proteolipid protein 2 (colonic epithelium-enriched)                              | 0.000238797 | Yes | Yes | No | No | No | No | No  | No  |
| 11117  | EMILIN1   | elastin microfibril interfacer 1                                                 | 0.00023943  | Yes | No  | No | No | No | No | No  | No  |
| 51232  | CRIM1     | cysteine rich transmembrane BMP regulator 1 (chordin-like)                       | 0.000239532 | Yes | No  | No | No | No | No | No  | No  |
| 50628  | GEMIN4    | gem (nuclear organelle) associated protein 4                                     | 0.000239992 | No  | No  | No | No | No | No | Yes | No  |
| 84660  | CCDC62    | coiled-coil domain containing 62                                                 | 0.000240422 | Yes | No  | No | No | No | No | No  | No  |
| 10342  | TFG       | TRK-fused gene                                                                   | 0.000242668 | No  | Yes | No | No | No | No | Yes | No  |
| 7104   | TM4SF4    | transmembrane 4 L six family member 4                                            | 0.000243103 | Yes | No  | No | No | No | No | No  | No  |
| 57198  | ATPB2     | ATPase, class I, type 8B, member 2                                               | 0.000243517 | Yes | No  | No | No | No | No | No  | No  |

|        |         |                                                                                        |             |     |     |    |    |    |     |     |
|--------|---------|----------------------------------------------------------------------------------------|-------------|-----|-----|----|----|----|-----|-----|
| 5362   | PLXNA2  | plexin A2                                                                              | 0.000244891 | Yes | No  | No | No | No | Yes | No  |
| 112936 | VPS26B  | vacuolar protein sorting 26 homolog B (S. pombe)                                       | 0.000245381 | Yes | No  | No | No | No | No  | No  |
| 79829  | NAT11   | N-acetyltransferase 11                                                                 | 0.000245533 | Yes | No  | No | No | No | No  | No  |
| 3569   | IL6     | interleukin 6 (interferon, beta 2)                                                     | 0.000247001 | Yes | No  | No | No | No | No  | No  |
| 868    | CBLB    | Cas-Br-M (murine) ecotropic retroviral transforming sequence b                         | 0.000248537 | Yes | No  | No | No | No | No  | No  |
| 64215  | DNAJC1  | DnaJ (Hsp40) homolog, subfamily C, member 1                                            | 0.000249129 | Yes | No  | No | No | No | No  | No  |
| 147912 | SIX5    | SIX homeobox 5                                                                         | 0.000249817 | Yes | No  | No | No | No | No  | No  |
| 84532  | ACSS1   | acyl-CoA synthetase short-chain family member 1                                        | 0.000250919 | Yes | No  | No | No | No | No  | No  |
| 770    | CA11    | carbonic anhydrase XI                                                                  | 0.000251545 | Yes | No  | No | No | No | No  | No  |
| 1200   | TPP1    | tripeptidyl peptidase I                                                                | 0.000253338 | Yes | No  | No | No | No | Yes | Yes |
| 10512  | SEMA3C  | sema domain, immunoglobulin domain (Ig), short basic domain, secreted, (semaphorin) 3C | 0.000254636 | Yes | No  | No | No | No | No  | No  |
| 6778   | STAT6   | signal transducer and activator of transcription 6, interleukin-4 induced              | 0.00025512  | Yes | No  | No | No | No | Yes | Yes |
| 7705   | ZNF146  | zinc finger protein 146                                                                | 0.000255315 | No  | No  | No | No | No | Yes | Yes |
| 79143  | MBOAT7  | membrane bound O-acyltransferase domain containing 7                                   | 0.000255544 | Yes | No  | No | No | No | No  | No  |
| 80705  | TSGA10  | testis specific, 10                                                                    | 0.000255663 | No  | No  | No | No | No | Yes | No  |
| 7779   | SLC30A1 | solute carrier family 30 (zinc transporter), member 1                                  | 0.000255709 | Yes | Yes | No | No | No | No  | No  |
| 2597   | GAPDH   | glyceraldehyde-3-phosphate dehydrogenase                                               | 0.000255816 | No  | No  | No | No | No | Yes | No  |
| 257019 | FRMD3   | FERM domain containing 3                                                               | 0.000257685 | Yes | No  | No | No | No | No  | No  |
| 5373   | PMM2    | phosphomannomutase 2                                                                   | 0.000258333 | Yes | No  | No | No | No | No  | No  |
| 84266  | ALKBH7  | alkB, alkylation repair homolog 7 (E. coli)                                            | 0.000258982 | No  | No  | No | No | No | Yes | No  |
| 55509  | BATF3   | basic leucine zipper transcription factor, ATF-like 3                                  | 0.000259212 | Yes | No  | No | No | No | No  | No  |
| 2309   | FOXO3   | forkhead box O3                                                                        | 0.000259553 | Yes | No  | No | No | No | No  | No  |
| 9716   | AQR     | aquarius homolog (mouse)                                                               | 0.000261094 | Yes | No  | No | No | No | No  | No  |
| 51201  | ZDHHC2  | zinc finger, DHHC-type containing 2                                                    | 0.000261304 | Yes | No  | No | No | No | No  | No  |
| 57634  | EP400   | E1A binding protein p400                                                               | 0.000262626 | Yes | No  | No | No | No | No  | No  |
| 3749   | KCNC4   | potassium voltage-gated channel, Shaw-related subfamily, member 4                      | 0.000262741 | Yes | No  | No | No | No | No  | No  |
| 84620  | ST6GAL2 | ST6 beta-galactosamide alpha-2,6-sialyltransferase 2                                   | 0.000263391 | No  | Yes | No | No | No | No  | No  |
| 3717   | JAK2    | Janus kinase 2 (a protein tyrosine kinase)                                             | 0.000263623 | Yes | No  | No | No | No | No  | No  |
| 253635 | CODC75  | coiled-coil domain containing 75                                                       | 0.000264274 | Yes | Yes | No | No | No | No  | No  |
| 2222   | FDF1    | farnesyl-diphosphate farnesyltransferase 1                                             | 0.00026429  | Yes | No  | No | No | No | No  | No  |
| 10579  | TACC2   | transforming, acidic coiled-coil containing protein 2                                  | 0.000264676 | Yes | No  | No | No | No | No  | No  |
| 1806   | DPYD    | dihydropyrimidine dehydrogenase                                                        | 0.000265615 | Yes | No  | No | No | No | No  | No  |
| 51706  | CYB5R1  | cytochrome b5 reductase 1                                                              | 0.000267637 | Yes | No  | No | No | No | No  | No  |
| 9379   | NRXN2   | neurexin 2                                                                             | 0.000268924 | Yes | No  | No | No | No | No  | No  |





|        |               |                                                                  |             |     |     |    |    |    |    |     |     |
|--------|---------------|------------------------------------------------------------------|-------------|-----|-----|----|----|----|----|-----|-----|
| 51119  | SBDS          | Shwachman-Bodian-Diamond syndrome                                | 0.00029935  | Yes | No  | No | No | No | No | No  | No  |
| 8321   | FZD1          | frizzled homolog 1 (Drosophila)                                  | 0.000299429 | No  | No  | No | No | No | No | Yes | No  |
| 84304  | NUDT22        | nudix (nucleoside diphosphate linked moiety X)-type motif 22     | 0.000300306 | No  | No  | No | No | No | No | Yes | No  |
| 11004  | KIF2C         | kinesin family member 2C                                         | 0.000300766 | No  | No  | No | No | No | No | Yes | No  |
| 93273  | LEMD1         | LEM domain containing 1                                          | 0.000301184 | Yes | No  | No | No | No | No | No  | No  |
| 6322   | SCML1         | sex comb on midleg-like 1 (Drosophila)                           | 0.000302057 | Yes | No  | No | No | No | No | No  | No  |
| 6643   | SNX2          | sorting nexin 2                                                  | 0.000302572 | Yes | No  | No | No | No | No | No  | No  |
| 7468   | WHSC1         | Wolf-Hirschhorn syndrome candidate 1                             | 0.000303246 | No  | Yes | No | No | No | No | No  | No  |
| 25849  | DKFZP564O0823 | DKFZP564O0823 protein                                            | 0.000303879 | No  | Yes | No | No | No | No | No  | No  |
| 6134   | RPL10         | ribosomal protein L10                                            | 0.000303943 | Yes | No  | No | No | No | No | No  | No  |
| 285521 | COX18         | COX18 cytochrome c oxidase assembly homolog (S. cerevisiae)      | 0.00030415  | Yes | No  | No | No | No | No | No  | No  |
| 114885 | OSBPL11       | oxysterol binding protein-like 11                                | 0.000304503 | No  | No  | No | No | No | No | Yes | No  |
| 283870 | C16orf79      | chromosome 16 open reading frame 79                              | 0.000304739 | Yes | No  | No | No | No | No | No  | No  |
| 56135  | PCDHAC1       | protocadherin alpha subfamily C, 1                               | 0.000305836 | Yes | No  | No | No | No | No | No  | No  |
| 2683   | B4GALT1       | UDP-Gal:betaGlcNAc beta 1,4-galactosyltransferase, polypeptide 1 | 0.000307438 | Yes | No  | No | No | No | No | No  | No  |
| 29105  | C16orf80      | chromosome 16 open reading frame 80                              | 0.000307601 | No  | No  | No | No | No | No | Yes | No  |
| 23558  | WBP2          | WW domain binding protein 2                                      | 0.000308729 | Yes | No  | No | No | No | No | No  | No  |
| 338699 | ANKRD42       | ankyrin repeat domain 42                                         | 0.000309655 | Yes | No  | No | No | No | No | No  | No  |
| 2853   | GPR31         | G protein-coupled receptor 31                                    | 0.000310097 | Yes | No  | No | No | No | No | No  | No  |
| 994    | CDC25B        | cell division cycle 25 homolog B (S. pombe)                      | 0.000310528 | No  | No  | No | No | No | No | Yes | No  |
| 1942   | EFNA1         | ephrin-A1                                                        | 0.000311661 | Yes | No  | No | No | No | No | No  | No  |
| 11019  | LIAS          | lipic acid synthetase                                            | 0.000313666 | No  | No  | No | No | No | No | Yes | No  |
| 65263  | PYCR1         | pyrroline-5-carboxylate reductase-like                           | 0.000313734 | Yes | No  | No | No | No | No | No  | No  |
| 142910 | LIPJ          | lipase, family member J                                          | 0.000313889 | No  | Yes | No | No | No | No | No  | No  |
| 120071 | GYLTL1B       | glycosyltransferase-like 1B                                      | 0.000313914 | Yes | No  | No | No | No | No | No  | No  |
| 6206   | RPS12         | ribosomal protein S12                                            | 0.000316614 | No  | No  | No | No | No | No | Yes | No  |
| 55084  | SOBP          | sine oculis binding protein homolog (Drosophila)                 | 0.000317828 | Yes | No  | No | No | No | No | No  | No  |
| 10585  | POMT1         | protein-O-mannosyltransferase 1                                  | 0.000317948 | Yes | No  | No | No | No | No | No  | No  |
| 55773  | TBC1D23       | TBC1 domain family, member 23                                    | 0.000320158 | Yes | No  | No | No | No | No | No  | No  |
| 55230  | USP40         | ubiquitin specific peptidase 40                                  | 0.000320631 | Yes | No  | No | No | No | No | No  | No  |
| 200765 | TIGD1         | tigger transposable element derived 1                            | 0.000320642 | No  | No  | No | No | No | No | Yes | No  |
| 7556   | ZNF10         | zinc finger protein 10                                           | 0.000321473 | No  | No  | No | No | No | No | Yes | No  |
| 5547   | PRCP          | prolylcarboxypeptidase (angiotensinase C)                        | 0.00032184  | Yes | No  | No | No | No | No | Yes | Yes |
| 55670  | PEX26         | peroxisome biogenesis factor 26                                  | 0.000323431 | No  | Yes | No | No | No | No | No  | No  |

|        |         |                                                                    |             |     |     |    |    |    |    |     |     |
|--------|---------|--------------------------------------------------------------------|-------------|-----|-----|----|----|----|----|-----|-----|
| 57488  | FAM62B  | family with sequence similarity 62 (C2 domain containing) member B | 0.000323717 | No  | No  | No | No | No | No | Yes | No  |
| 5286   | PIK3C2A | phosphoinositide-3-kinase, class 2, alpha polypeptide              | 0.000324626 | Yes | No  | No | No | No | No | No  | No  |
| 595    | CCND1   | cyclin D1                                                          | 0.000327612 | Yes | No  | No | No | No | No | Yes | Yes |
| 2648   | GCN5L2  | GCN5 general control of amino-acid synthesis 5-like 2 (yeast)      | 0.000328716 | Yes | No  | No | No | No | No | No  | No  |
| 6659   | SOX4    | SRY (sex determining region Y)-box 4                               | 0.000330236 | Yes | No  | No | No | No | No | No  | No  |
| 5291   | PIK3CB  | phosphoinositide-3-kinase, catalytic, beta polypeptide             | 0.000330473 | Yes | No  | No | No | No | No | No  | No  |
| 79959  | CEP76   | centrosomal protein 76kDa                                          | 0.000331934 | No  | No  | No | No | No | No | Yes | No  |
| 3659   | IRF1    | interferon regulatory factor 1                                     | 0.000333398 | Yes | No  | No | No | No | No | No  | No  |
| 54429  | TAS2R5  | taste receptor, type 2, member 5                                   | 0.000333689 | No  | No  | No | No | No | No | Yes | No  |
| 59348  | ZNF350  | zinc finger protein 350                                            | 0.000338718 | Yes | No  | No | No | No | No | Yes | No  |
| 54808  | DYM     | dymeclin                                                           | 0.000338834 | Yes | No  | No | No | No | No | No  | No  |
| 55746  | NUP133  | nucleoporin 133kDa                                                 | 0.000342264 | No  | No  | No | No | No | No | Yes | No  |
| 3753   | KCNE1   | potassium voltage-gated channel, Isk-related family, member 1      | 0.000344132 | Yes | No  | No | No | No | No | No  | No  |
| 4204   | MECP2   | methyl CpG binding protein 2 (Rett syndrome)                       | 0.000344621 | Yes | Yes | No | No | No | No | No  | No  |
| 27010  | TPK1    | thiamin pyrophosphokinase 1                                        | 0.000344873 | Yes | No  | No | No | No | No | No  | No  |
| 85476  | GFM1    | G elongation factor, mitochondrial 1                               | 0.000344987 | Yes | No  | No | No | No | No | No  | No  |
| 57515  | SERINC1 | serine incorporator 1                                              | 0.000346378 | Yes | No  | No | No | No | No | Yes | Yes |
| 5734   | PTGER4  | prostaglandin E receptor 4 (subtype EP4)                           | 0.000347068 | Yes | No  | No | No | No | No | No  | No  |
| 3766   | KCNJ10  | potassium inwardly-rectifying channel, subfamily J, member 10      | 0.000347742 | Yes | No  | No | No | No | No | No  | No  |
| 3765   | KCNJ9   | potassium inwardly-rectifying channel, subfamily J, member 9       | 0.000347742 | No  | Yes | No | No | No | No | No  | No  |
| 253827 | MSRB3   | methionine sulfoxide reductase B3                                  | 0.000348349 | Yes | No  | No | No | No | No | No  | No  |
| 253980 | KCTD13  | potassium channel tetramerisation domain containing 13             | 0.000350246 | Yes | No  | No | No | No | No | No  | No  |
| 3687   | ITGAX   | integrin, alpha X (complement component 3 receptor 4 subunit)      | 0.000352366 | Yes | No  | No | No | No | No | No  | No  |
| 7189   | TRAF6   | TNF receptor-associated factor 6                                   | 0.000355894 | Yes | No  | No | No | No | No | No  | No  |
| 5217   | PFN2    | profilin 2                                                         | 0.000357699 | No  | No  | No | No | No | No | Yes | No  |
| 83700  | JAM3    | junctional adhesion molecule 3                                     | 0.000357919 | Yes | No  | No | No | No | No | No  | No  |
| 60685  | ZFAND3  | zinc finger, AN1-type domain 3                                     | 0.000358457 | Yes | No  | No | No | No | No | No  | No  |
| 27283  | TINAG   | tubulointerstitial nephritis antigen                               | 0.000358717 | Yes | No  | No | No | No | No | No  | No  |
| 22859  | LPHN1   | latrophilin 1                                                      | 0.000359117 | No  | No  | No | No | No | No | Yes | No  |
| 2152   | F3      | coagulation factor III (thromboplastin, tissue factor)             | 0.000359793 | Yes | No  | No | No | No | No | No  | No  |
| 2896   | GRN     | granulin                                                           | 0.000361767 | Yes | No  | No | No | No | No | No  | No  |
| 286097 | EFHA2   | EF-hand domain family, member A2                                   | 0.000362002 | Yes | No  | No | No | No | No | No  | No  |
| 6166   | RPL36AL | ribosomal protein L36a-like                                        | 0.000363053 | No  | No  | No | No | No | No | Yes | No  |
| 7072   | TIA1    | TIA1 cytotoxic granule-associated RNA binding protein              | 0.000364729 | Yes | No  | No | No | No | No | No  | No  |



|        |           |                                                                                          |             |     |     |    |    |    |     |     |     |
|--------|-----------|------------------------------------------------------------------------------------------|-------------|-----|-----|----|----|----|-----|-----|-----|
| 23495  | TNFRSF13B | tumor necrosis factor receptor superfamily, member 13B                                   | 0.000411944 | Yes | Yes | No | No | No | No  | No  | No  |
| 9338   | TCEAL1    | transcription elongation factor A (SII)-like 1                                           | 0.000413604 | Yes | No  | No | No | No | No  | No  | No  |
| 7290   | HIRA      | HIR histone cell cycle regulation defective homolog A (S. cerevisiae)                    | 0.000416242 | Yes | No  | No | No | No | No  | No  | No  |
| 5550   | PREP      | prolyl endopeptidase                                                                     | 0.000424459 | Yes | No  | No | No | No | No  | No  | No  |
| 26051  | PPP1R16B  | protein phosphatase 1, regulatory (inhibitor) subunit 16B                                | 0.000424608 | Yes | No  | No | No | No | Yes | Yes | Yes |
| 55313  | FLJ11151  | hypothetical protein FLJ11151                                                            | 0.000426287 | Yes | No  | No | No | No | No  | No  | No  |
| 51592  | TRIM33    | tripartite motif-containing 33                                                           | 0.000427544 | Yes | No  | No | No | No | No  | No  | No  |
| 4330   | MN1       | meningioma (disrupted in balanced translocation) 1                                       | 0.000428309 | Yes | No  | No | No | No | No  | No  | No  |
| 7559   | ZNF12     | zinc finger protein 12                                                                   | 0.000430325 | Yes | No  | No | No | No | No  | No  | No  |
| 151258 | SLC38A11  | solute carrier family 38, member 11                                                      | 0.000431558 | Yes | No  | No | No | No | No  | No  | No  |
| 64863  | METTL4    | methyltransferase like 4                                                                 | 0.000433166 | No  | No  | No | No | No | Yes | No  | No  |
| 23603  | CORO1C    | coronin, actin binding protein, 1C                                                       | 0.000433651 | Yes | Yes | No | No | No | No  | No  | No  |
| 1130   | LYST      | lysosomal trafficking regulator                                                          | 0.000436793 | Yes | No  | No | No | No | No  | No  | No  |
| 8379   | MAD1L1    | MAD1 mitotic arrest deficient-like 1 (yeast)                                             | 0.000438437 | Yes | No  | No | No | No | No  | No  | No  |
| 2788   | GNG7      | guanine nucleotide binding protein (G protein), gamma 7                                  | 0.000441754 | Yes | Yes | No | No | No | Yes | No  | No  |
| 55298  | RNF121    | ring finger protein 121                                                                  | 0.000445058 | No  | No  | No | No | No | Yes | No  | No  |
| 6009   | RHEB      | Ras homolog enriched in brain                                                            | 0.000446757 | Yes | No  | No | No | No | No  | No  | No  |
| 158234 | RG9MTD3   | RNA (guanine-9-) methyltransferase domain containing 3                                   | 0.000449305 | Yes | No  | No | No | No | No  | No  | No  |
| 80315  | CPEB4     | cytoplasmic polyadenylation element binding protein 4                                    | 0.000450403 | Yes | No  | No | No | No | Yes | No  | No  |
| 3937   | LCP2      | lymphocyte cytosolic protein 2 (SH2 domain containing leukocyte protein of 76kDa)        | 0.000450558 | Yes | No  | No | No | No | No  | No  | No  |
| 404550 | C16orf74  | chromosome 16 open reading frame 74                                                      | 0.000450981 | Yes | No  | No | No | No | No  | No  | No  |
| 11033  | CENTA1    | centaurin, alpha 1                                                                       | 0.000452679 | Yes | No  | No | No | No | No  | No  | No  |
| 55251  | PCMTD2    | protein-L-isospartate (D-aspartate) O-methyltransferase domain containing 2              | 0.000455348 | No  | Yes | No | No | No | No  | No  | No  |
| 9519   | TBPL1     | TBP-like 1                                                                               | 0.000458368 | No  | No  | No | No | No | Yes | No  | No  |
| 2571   | GAD1      | glutamate decarboxylase 1 (brain, 67kDa)                                                 | 0.000458544 | Yes | No  | No | No | No | No  | No  | No  |
| 23396  | PIP5K1C   | phosphatidylinositol-4-phosphate 5-kinase, type I, gamma                                 | 0.000458558 | Yes | No  | No | No | No | No  | No  | No  |
| 4883   | NPR3      | natriuretic peptide receptor C/guanylate cyclase C (atrionatriuretic peptide receptor C) | 0.000458575 | Yes | No  | No | No | No | No  | No  | No  |
| 9657   | IQCB1     | IQ motif containing B1                                                                   | 0.000464621 | No  | Yes | No | No | No | Yes | No  | No  |
| 10981  | RAB32     | RAB32, member RAS oncogene family                                                        | 0.000464635 | No  | Yes | No | No | No | No  | No  | No  |
| 347902 | AMIGO2    | adhesion molecule with Ig-like domain 2                                                  | 0.000469715 | Yes | No  | No | No | No | No  | No  | No  |
| 387680 | FAM21A    | family with sequence similarity 21, member A                                             | 0.000471602 | Yes | No  | No | No | No | No  | No  | No  |
| 8546   | AP3B1     | adaptor-related protein complex 3, beta 1 subunit                                        | 0.000474821 | Yes | No  | No | No | No | Yes | No  | No  |
| 123803 | NTAN1     | N-terminal asparagine amidase                                                            | 0.000480104 | No  | Yes | No | No | No | No  | No  | No  |
| 3916   | LAMP1     | lysosomal-associated membrane protein 1                                                  | 0.000481239 | Yes | No  | No | No | No | Yes | Yes | Yes |

|        |          |                                                           |             |     |     |    |    |    |    |     |    |
|--------|----------|-----------------------------------------------------------|-------------|-----|-----|----|----|----|----|-----|----|
| 8690   | JRKL     | jerky homolog-like (mouse)                                | 0.000481314 | No  | No  | No | No | No | No | Yes | No |
| 3670   | ISL1     | ISL LIM homeobox 1                                        | 0.000482632 | No  | Yes | No | No | No | No | No  | No |
| 7768   | ZNF225   | zinc finger protein 225                                   | 0.000482639 | Yes | No  | No | No | No | No | Yes | No |
| 90407  | TMEM41A  | transmembrane protein 41A                                 | 0.000483979 | Yes | No  | No | No | No | No | No  | No |
| 10878  | CFHR3    | complement factor H-related 3                             | 0.000484955 | Yes | No  | No | No | No | No | No  | No |
| 11279  | KLF8     | Kruppel-like factor 8                                     | 0.000487845 | Yes | No  | No | No | No | No | No  | No |
| 285598 | ARL10    | ADP-ribosylation factor-like 10                           | 0.000487873 | Yes | No  | No | No | No | No | No  | No |
| 3632   | INPP5A   | inositol polyphosphate-5-phosphatase, 40kDa               | 0.000490397 | Yes | No  | No | No | No | No | No  | No |
| 4676   | NAP1L4   | nucleosome assembly protein 1-like 4                      | 0.000494604 | No  | Yes | No | No | No | No | No  | No |
| 9971   | NR1H4    | nuclear receptor subfamily 1, group H, member 4           | 0.000500935 | Yes | No  | No | No | No | No | No  | No |
| 7136   | TNNI2    | troponin I type 2 (skeletal, fast)                        | 0.000503029 | Yes | No  | No | No | No | No | No  | No |
| 55634  | ZNF673   | zinc finger family member 673                             | 0.000503715 | Yes | No  | No | No | No | No | No  | No |
| 2252   | FGF7     | fibroblast growth factor 7 (keratinocyte growth factor)   | 0.000505542 | Yes | No  | No | No | No | No | No  | No |
| 9898   | UBAP2L   | ubiquitin associated protein 2-like                       | 0.000506021 | Yes | No  | No | No | No | No | No  | No |
| 64427  | TTC31    | tetratricopeptide repeat domain 31                        | 0.000508589 | Yes | No  | No | No | No | No | No  | No |
| 11035  | RIPK3    | receptor-interacting serine-threonine kinase 3            | 0.00051084  | Yes | No  | No | No | No | No | No  | No |
| 57577  | KIAA1407 | KIAA1407                                                  | 0.0005109   | No  | Yes | No | No | No | No | No  | No |
| 126231 | ZNF573   | zinc finger protein 573                                   | 0.000512494 | Yes | Yes | No | No | No | No | No  | No |
| 284361 | C19orf63 | chromosome 19 open reading frame 63                       | 0.000513719 | No  | No  | No | No | No | No | Yes | No |
| 4670   | HNRNPM   | heterogeneous nuclear ribonucleoprotein M                 | 0.000517234 | No  | No  | No | No | No | No | Yes | No |
| 54536  | EXOC6    | exocyst complex component 6                               | 0.000517869 | Yes | No  | No | No | No | No | No  | No |
| 55291  | SAPS3    | SAPS domain family, member 3                              | 0.000521917 | Yes | No  | No | No | No | No | No  | No |
| 151651 | EFHB     | EF-hand domain family, member B                           | 0.000523653 | Yes | No  | No | No | No | No | No  | No |
| 94274  | PPP1R14A | protein phosphatase 1, regulatory (inhibitor) subunit 14A | 0.000525548 | Yes | No  | No | No | No | No | No  | No |
| 23761  | PISD     | phosphatidylserine decarboxylase                          | 0.000525782 | No  | No  | No | No | No | No | Yes | No |
| 6257   | RXRB     | retinoid X receptor, beta                                 | 0.000525926 | Yes | No  | No | No | No | No | No  | No |
| 79901  | CYBRD1   | cytochrome b reductase 1                                  | 0.000526687 | Yes | No  | No | No | No | No | No  | No |
| 11200  | CHEK2    | CHK2 checkpoint homolog (S. pombe)                        | 0.000532611 | No  | No  | No | No | No | No | Yes | No |
| 51816  | CECR1    | cat eye syndrome chromosome region, candidate 1           | 0.000532631 | Yes | No  | No | No | No | No | No  | No |
| 79890  | RIN3     | Ras and Rab interactor 3                                  | 0.000533157 | Yes | Yes | No | No | No | No | Yes | No |
| 5001   | ORC5L    | origin recognition complex, subunit 5-like (yeast)        | 0.000534717 | Yes | No  | No | No | No | No | No  | No |
| 79875  | THSD4    | thrombospondin, type I, domain containing 4               | 0.000537369 | Yes | No  | No | No | No | No | No  | No |
| 10876  | FAM12A   | family with sequence similarity 12, member A              | 0.000538159 | No  | Yes | No | No | No | No | No  | No |
| 828    | CAPS     | calcyphosine                                              | 0.00053993  | Yes | No  | No | No | No | No | No  | No |

|        |          |                                                                             |             |     |     |    |    |    |     |     |     |
|--------|----------|-----------------------------------------------------------------------------|-------------|-----|-----|----|----|----|-----|-----|-----|
| 158399 | ZNF483   | zinc finger protein 483                                                     | 0.000546177 | Yes | No  | No | No | No | No  | No  | No  |
| 8879   | SGPL1    | sphingosine-1-phosphate lyase 1                                             | 0.000547881 | Yes | No  | No | No | No | No  | No  | No  |
| 1457   | CSNK2A1  | casein kinase 2, alpha 1 polypeptide                                        | 0.000548051 | No  | No  | No | No | No | Yes | No  | No  |
| 1366   | CLDN7    | claudin 7                                                                   | 0.000548236 | Yes | No  | No | No | No | No  | No  | No  |
| 7225   | TRPC6    | transient receptor potential cation channel, subfamily C, member 6          | 0.000549543 | Yes | No  | No | No | No | No  | No  | No  |
| 9550   | ATP6V1G1 | ATPase, H+ transporting, lysosomal 13kDa, V1 subunit G1                     | 0.000554633 | No  | Yes | No | No | No | No  | No  | No  |
| 23093  | TTLL5    | tubulin tyrosine ligase-like family, member 5                               | 0.000563808 | Yes | No  | No | No | No | No  | No  | No  |
| 9293   | GPR52    | G protein-coupled receptor 52                                               | 0.000566795 | Yes | No  | No | No | No | No  | No  | No  |
| 2243   | FGA      | fibrinogen alpha chain                                                      | 0.000566883 | Yes | No  | No | No | No | No  | No  | No  |
| 284370 | ZNF615   | zinc finger protein 615                                                     | 0.000566921 | Yes | No  | No | No | No | No  | No  | No  |
| 51132  | RNF12    | ring finger protein 12                                                      | 0.000571077 | Yes | No  | No | No | No | Yes | No  | No  |
| 23586  | DDX58    | DEAD (Asp-Glu-Ala-Asp) box polypeptide 58                                   | 0.000571294 | Yes | No  | No | No | No | Yes | No  | No  |
| 57761  | TRIB3    | tribbles homolog 3 (Drosophila)                                             | 0.000582033 | Yes | Yes | No | No | No | No  | No  | No  |
| 7881   | KCNAB1   | potassium voltage-gated channel, shaker-related subfamily, beta member 1    | 0.000582459 | Yes | Yes | No | No | No | No  | No  | No  |
| 79818  | ZNF552   | zinc finger protein 552                                                     | 0.000585238 | No  | Yes | No | No | No | No  | No  | No  |
| 8790   | FPGT     | fructose-1-phosphate guanylyltransferase                                    | 0.000585486 | Yes | No  | No | No | No | Yes | Yes | Yes |
| 64794  | DDX31    | DEAD (Asp-Glu-Ala-Asp) box polypeptide 31                                   | 0.000586108 | Yes | No  | No | No | No | No  | No  | No  |
| 55702  | CCDC94   | coiled-coil domain containing 94                                            | 0.00058849  | No  | No  | No | No | No | Yes | No  | No  |
| 51128  | SAR1B    | SAR1 gene homolog B (S. cerevisiae)                                         | 0.000594059 | No  | No  | No | No | No | Yes | No  | No  |
| 51433  | ANAPC5   | anaphase promoting complex subunit 5                                        | 0.000597293 | Yes | No  | No | No | No | No  | No  | No  |
| 56674  | TMEM9B   | TMEM9 domain family, member B                                               | 0.000597352 | Yes | No  | No | No | No | No  | No  | No  |
| 127391 | TMCO2    | transmembrane and coiled-coil domains 2                                     | 0.000598817 | Yes | No  | No | No | No | No  | No  | No  |
| 140685 | ZBTB46   | zinc finger and BTB domain containing 46                                    | 0.00060279  | Yes | No  | No | No | No | No  | No  | No  |
| 9798   | KIAA0174 | KIAA0174                                                                    | 0.000603484 | No  | No  | No | No | No | Yes | No  | No  |
| 160622 | GRASP    | GRP1 (general receptor for phosphoinositides 1)-associated scaffold protein | 0.000606493 | Yes | No  | No | No | No | No  | No  | No  |
| 55644  | OSGEP    | O-sialoglycoprotein endopeptidase                                           | 0.000608338 | Yes | No  | No | No | No | Yes | Yes | Yes |
| 1678   | TIMM8A   | translocase of inner mitochondrial membrane 8 homolog A (yeast)             | 0.000609606 | No  | No  | No | No | No | Yes | No  | No  |
| 64174  | DPEP2    | dipeptidase 2                                                               | 0.000611167 | Yes | No  | No | No | No | No  | No  | No  |
| 316    | AOX1     | aldehyde oxidase 1                                                          | 0.000612728 | No  | Yes | No | No | No | No  | No  | No  |
| 30613  | VSX1     | visual system homeobox 1                                                    | 0.000616476 | Yes | No  | No | No | No | No  | No  | No  |
| 64762  | FAM59A   | family with sequence similarity 59, member A                                | 0.000616916 | Yes | No  | No | No | No | No  | No  | No  |
| 6790   | AURKA    | aurora kinase A                                                             | 0.000618595 | No  | No  | No | No | No | Yes | No  | No  |
| 3726   | JUNB     | jun B proto-oncogene                                                        | 0.000620209 | Yes | No  | No | No | No | Yes | Yes | Yes |
| 9779   | TBC1D5   | TBC1 domain family, member 5                                                | 0.000620472 | Yes | No  | No | No | No | No  | No  | No  |

|        |           |                                                                                       |             |     |     |    |    |    |    |     |    |
|--------|-----------|---------------------------------------------------------------------------------------|-------------|-----|-----|----|----|----|----|-----|----|
| 80764  | THAP7     | THAP domain containing 7                                                              | 0.000622395 | Yes | No  | No | No | No | No | Yes | No |
| 85363  | TRIM5     | tripartite motif-containing 5                                                         | 0.000623312 | No  | No  | No | No | No | No | Yes | No |
| 51571  | FAM49B    | family with sequence similarity 49, member B                                          | 0.000628683 | Yes | No  | No | No | No | No | No  | No |
| 388165 | FLJ43276  | similar to ubiquitin-conjugating enzyme E2Q 2                                         | 0.000629489 | NA* | Yes | No | No | No | No | No  | No |
| 146    | ADRA1D    | adrenergic, alpha-1D-, receptor                                                       | 0.000631397 | Yes | No  | No | No | No | No | No  | No |
| 8792   | TNFRSF11A | tumor necrosis factor receptor superfamily, member 11a, NFKB activator                | 0.000636974 | Yes | No  | No | No | No | No | No  | No |
| 2760   | GM2A      | GM2 ganglioside activator                                                             | 0.000640555 | Yes | Yes | No | No | No | No | No  | No |
| 23352  | UBR4      | ubiquitin protein ligase E3 component n-recogin 4                                     | 0.000648861 | Yes | No  | No | No | No | No | No  | No |
| 10131  | TRAP1     | TNF receptor-associated protein 1                                                     | 0.000650421 | No  | Yes | No | No | No | No | No  | No |
| 80726  | KIAA1683  | KIAA1683                                                                              | 0.000656593 | Yes | No  | No | No | No | No | No  | No |
| 2937   | GSS       | glutathione synthetase                                                                | 0.000657634 | Yes | Yes | No | No | No | No | No  | No |
| 56999  | ADAMTS9   | ADAM metalloproteinase with thrombospondin type 1 motif, 9                            | 0.000661766 | Yes | No  | No | No | No | No | No  | No |
| 8600   | TNFSF11   | tumor necrosis factor (ligand) superfamily, member 11                                 | 0.000662602 | Yes | No  | No | No | No | No | No  | No |
| 375298 | CERKL     | ceramide kinase-like                                                                  | 0.000663616 | Yes | No  | No | No | No | No | No  | No |
| 93185  | IGSF8     | immunoglobulin superfamily, member 8                                                  | 0.000664284 | Yes | No  | No | No | No | No | No  | No |
| 10299  | MARCH6    | membrane-associated ring finger (C3HC4) 6                                             | 0.000665955 | Yes | No  | No | No | No | No | No  | No |
| 9527   | GOSR1     | golgi SNAP receptor complex member 1                                                  | 0.000667761 | Yes | No  | No | No | No | No | No  | No |
| 8796   | SCEL      | scellin                                                                               | 0.000669396 | Yes | No  | No | No | No | No | No  | No |
| 1102   | RCBTB2    | regulator of chromosome condensation (RCC1) and BTB (POZ) domain containing protein 2 | 0.000669905 | No  | Yes | No | No | No | No | No  | No |
| 27031  | NPHP3     | nephronophthisis 3 (adolescent)                                                       | 0.000673728 | Yes | No  | No | No | No | No | No  | No |
| 29967  | LRP12     | low density lipoprotein-related protein 12                                            | 0.000676394 | Yes | No  | No | No | No | No | No  | No |
| 80895  | ILKAP     | integrin-linked kinase-associated serine/threonine phosphatase 2C                     | 0.000679408 | Yes | No  | No | No | No | No | No  | No |
| 201254 | STRA13    | stimulated by retinoic acid 13 homolog (mouse)                                        | 0.000680814 | No  | Yes | No | No | No | No | No  | No |
| 6342   | SCP2      | sterol carrier protein 2                                                              | 0.000683376 | No  | Yes | No | No | No | No | No  | No |
| 169611 | OLFML2A   | olfactomedin-like 2A                                                                  | 0.000684627 | Yes | No  | No | No | No | No | No  | No |
| 64800  | EFCAB6    | EF-hand calcium binding domain 6                                                      | 0.000684936 | Yes | No  | No | No | No | No | No  | No |
| 4904   | YBX1      | Y box binding protein 1                                                               | 0.000685039 | No  | No  | No | No | No | No | Yes | No |
| 55143  | CDC48     | cell division cycle associated 8                                                      | 0.000688604 | No  | No  | No | No | No | No | Yes | No |
| 23493  | HEY2      | hairly/enhancer-of-split related with YRPW motif 2                                    | 0.000690957 | Yes | No  | No | No | No | No | No  | No |
| 4253   | CTAGE5    | CTAGE family, member 5                                                                | 0.000692961 | Yes | No  | No | No | No | No | No  | No |
| 5295   | PIK3R1    | phosphoinositide-3-kinase, regulatory subunit 1 (alpha)                               | 0.000693443 | Yes | No  | No | No | No | No | No  | No |
| 10425  | ARIH2     | ariadne homolog 2 (Drosophila)                                                        | 0.000697805 | Yes | No  | No | No | No | No | Yes | No |
| 5099   | PCDH7     | protocadherin 7                                                                       | 0.000698696 | Yes | No  | No | No | No | No | No  | No |
| 11274  | USP18     | ubiquitin specific peptidase 18                                                       | 0.000702891 | Yes | No  | No | No | No | No | No  | No |



|        |            |                                                                                                                     |             |     |     |    |    |    |     |     |
|--------|------------|---------------------------------------------------------------------------------------------------------------------|-------------|-----|-----|----|----|----|-----|-----|
| 1429   | CRYZ       | crystallin, zeta (quinone reductase)                                                                                | 0.000709787 | No  | No  | No | No | No | Yes | No  |
| 23677  | SH3BP4     | SH3-domain binding protein 4                                                                                        | 0.000713747 | Yes | No  | No | No | No | No  | No  |
| 254050 | LRRC43     | leucine rich repeat containing 43                                                                                   | 0.000717731 | Yes | No  | No | No | No | No  | No  |
| 757    | TMEM50B    | transmembrane protein 50B                                                                                           | 0.000721743 | Yes | No  | No | No | No | No  | No  |
| 54101  | RIPK4      | receptor-interacting serine-threonine kinase 4                                                                      | 0.000724396 | Yes | No  | No | No | No | No  | No  |
| 150737 | TTC30B     | tetratricopeptide repeat domain 30B                                                                                 | 0.000725895 | No  | No  | No | No | No | Yes | No  |
| 5189   | PEX1       | peroxisome biogenesis factor 1                                                                                      | 0.000727909 | Yes | No  | No | No | No | No  | No  |
| 81533  | ITFG1      | integrin alpha FG-GAP repeat containing 1                                                                           | 0.000730476 | No  | No  | No | No | No | Yes | No  |
| 821    | CANX       | calnexin                                                                                                            | 0.000742939 | Yes | Yes | No | No | No | No  | No  |
| 10287  | RGS19      | regulator of G-protein signaling 19                                                                                 | 0.000744259 | Yes | No  | No | No | No | No  | No  |
| 23549  | DNPEP      | aspartyl aminopeptidase                                                                                             | 0.00074454  | Yes | No  | No | No | No | No  | No  |
| 275    | AMT        | aminomethyltransferase                                                                                              | 0.000744627 | Yes | No  | No | No | No | No  | No  |
| 3337   | DNAJB1     | DnaJ (Hsp40) homolog, subfamily B, member 1                                                                         | 0.000745684 | No  | Yes | No | No | No | No  | No  |
| 64132  | XYLT2      | xylosyltransferase II                                                                                               | 0.000748034 | Yes | No  | No | No | No | No  | No  |
| 39948  | FLJ45803   | FLJ45803 protein                                                                                                    | 0.000751809 | Yes | No  | No | No | No | No  | No  |
| 55601  | DDX60      | DEAD (Asp-Glu-Ala-Asp) box polypeptide 60                                                                           | 0.000754126 | Yes | Yes | No | No | No | No  | No  |
| 8073   | PTP4A2     | protein tyrosine phosphatase type IVA, member 2                                                                     | 0.00075648  | No  | No  | No | No | No | Yes | No  |
| 123169 | LEO1       | Leo1, Paf1/RNA polymerase II complex component, homolog (S. cerevisiae)                                             | 0.000757527 | No  | No  | No | No | No | Yes | No  |
| 57590  | WDFY1      | WD repeat and FYVE domain containing 1                                                                              | 0.000763523 | Yes | Yes | No | No | No | No  | No  |
| 9218   | VAPA       | VAMP (vesicle-associated membrane protein)-associated protein A, 33kDa                                              | 0.00076532  | Yes | No  | No | No | No | No  | No  |
| 55867  | SLC22A11   | solute carrier family 22 (organic anion/urate transporter), member 11                                               | 0.000766168 | Yes | No  | No | No | No | No  | No  |
| 10749  | KIF1C      | kinesin family member 1C                                                                                            | 0.000766242 | Yes | No  | No | No | No | No  | No  |
| 25619  | CCRN4L     | CCR4 carbon catabolite repression 4-like (S. cerevisiae)                                                            | 0.000766275 | No  | Yes | No | No | No | Yes | No  |
| 51747  | CROP       | cisplatin resistance-associated overexpressed protein                                                               | 0.000767278 | Yes | No  | No | No | No | No  | No  |
| 22798  | LAMB4      | laminin, beta 4                                                                                                     | 0.00077097  | Yes | No  | No | No | No | No  | No  |
| 7704   | ZBTB16     | zinc finger and BTB domain containing 16                                                                            | 0.000785352 | Yes | No  | No | No | No | No  | No  |
| 3683   | ITGAL      | integrin, alpha L (antigen CD11A (p180), lymphocyte function-associated antigen 1; alpha polypeptide)               | 0.000791021 | No  | No  | No | No | No | Yes | No  |
| 56994  | CHPT1      | choline phosphotransferase 1                                                                                        | 0.000793531 | Yes | No  | No | No | No | No  | No  |
| 3693   | ITGB5      | integrin, beta 5                                                                                                    | 0.000794079 | Yes | No  | No | No | No | No  | No  |
| 286133 | SCARA5     | scavenger receptor class A, member 5 (putative)                                                                     | 0.000796258 | Yes | No  | No | No | No | No  | No  |
| 23215  | BAT2D1     | BAT2 domain containing 1                                                                                            | 0.000801713 | No  | No  | No | No | No | Yes | Yes |
| 54103  | tcag7.1314 | hypothetical protein LOC54103                                                                                       | 0.000802252 | Yes | No  | No | No | No | No  | No  |
| 5621   | PRNP       | prion protein (p27-30) (Creutzfeldt-Jakob disease, Gerstmann-Strausler-Scheinker syndrome, fatal familial insomnia) | 0.00080758  | Yes | No  | No | No | No | No  | No  |
| 54361  | WNT4       | wingless-type MMTV integration site family, member 4                                                                | 0.000809176 | Yes | No  | No | No | No | No  | No  |

|        |         |                                                         |             |     |     |    |    |    |    |     |     |
|--------|---------|---------------------------------------------------------|-------------|-----|-----|----|----|----|----|-----|-----|
| 134510 | UBLCP1  | ubiquitin-like domain containing CTD phosphatase 1      | 0.000809952 | No  | Yes | No | No | No | No | No  | No  |
| 113791 | PIK3IP1 | phosphoinositide-3-kinase interacting protein 1         | 0.000810433 | Yes | No  | No | No | No | No | Yes | Yes |
| 5600   | MAPK11  | mitogen-activated protein kinase 11                     | 0.000812408 | Yes | No  | No | No | No | No | No  | No  |
| 8741   | TNFSF13 | tumor necrosis factor (ligand) superfamily, member 13   | 0.000812513 | Yes | No  | No | No | No | No | No  | No  |
| 912    | CD1D    | CD1d molecule                                           | 0.000813276 | Yes | No  | No | No | No | No | No  | No  |
| 283229 | EFCAB4A | EF-hand calcium binding domain 4A                       | 0.000814328 | Yes | No  | No | No | No | No | No  | No  |
| 9530   | BAG4    | BCL2-associated athanogene 4                            | 0.000814426 | No  | No  | No | No | No | No | Yes | No  |
| 339500 | ZNF678  | zinc finger protein 678                                 | 0.000815369 | Yes | No  | No | No | No | No | No  | No  |
| 11193  | WBP4    | WW domain binding protein 4 (formin binding protein 21) | 0.000815728 | No  | No  | No | No | No | No | Yes | No  |
| 9369   | NRXN3   | neurexin 3                                              | 0.000816186 | Yes | No  | No | No | No | No | No  | No  |
| 2649   | NR6A1   | nuclear receptor subfamily 6, group A, member 1         | 0.000816489 | Yes | No  | No | No | No | No | No  | No  |
| 253769 | WDR27   | WD repeat domain 27                                     | 0.000821822 | Yes | No  | No | No | No | No | No  | No  |
| 55788  | LMBRD1  | LMBR1 domain containing 1                               | 0.00082632  | Yes | No  | No | No | No | No | No  | No  |
| 147929 | ZNF565  | zinc finger protein 565                                 | 0.000833442 | No  | No  | No | No | No | No | Yes | No  |
| 25920  | COBRA1  | cofactor of BRCA1                                       | 0.000833773 | No  | Yes | No | No | No | No | No  | No  |
| 4257   | MGST1   | microsomal glutathione S-transferase 1                  | 0.000836929 | Yes | No  | No | No | No | No | No  | No  |
| 118788 | PIK3AP1 | phosphoinositide-3-kinase adaptor protein 1             | 0.000842066 | Yes | No  | No | No | No | No | No  | No  |
| 51710  | ZNF44   | zinc finger protein 44                                  | 0.000843025 | Yes | No  | No | No | No | No | No  | No  |
| 286336 | FAM78A  | family with sequence similarity 78, member A            | 0.000843804 | Yes | No  | No | No | No | No | No  | No  |
| 1371   | CPOX    | coproporphyrinogen oxidase                              | 0.000845757 | Yes | No  | No | No | No | No | No  | No  |
| 84708  | LNX1    | ligand of numb-protein X 1                              | 0.000849063 | Yes | No  | No | No | No | No | No  | No  |
| 8558   | CDK10   | cyclin-dependent kinase 10                              | 0.000851125 | Yes | No  | No | No | No | No | No  | No  |
| 3696   | ITGB8   | integrin, beta 8                                        | 0.000853403 | No  | No  | No | No | No | No | Yes | No  |
| 64919  | BCL11B  | B-cell CLL/lymphoma 11B (zinc finger protein)           | 0.000854388 | No  | Yes | No | No | No | No | No  | No  |
| 64761  | PARP12  | poly (ADP-ribose) polymerase family, member 12          | 0.000855759 | Yes | No  | No | No | No | No | No  | No  |
| 25925  | ZNF521  | zinc finger protein 521                                 | 0.000857648 | Yes | No  | No | No | No | No | No  | No  |
| 2316   | FLNA    | filamin A, alpha (actin binding protein 280)            | 0.000857736 | Yes | No  | No | No | No | No | No  | No  |
| 84905  | ZNF341  | zinc finger protein 341                                 | 0.000860619 | Yes | No  | No | No | No | No | No  | No  |
| 1769   | DNAH8   | dynein, axonemal, heavy chain 8                         | 0.000860989 | Yes | No  | No | No | No | No | No  | No  |
| 64781  | CERK    | ceramide kinase                                         | 0.000862366 | No  | Yes | No | No | No | No | No  | No  |
| 5052   | PRDX1   | peroxiredoxin 1                                         | 0.000862997 | No  | No  | No | No | No | No | Yes | No  |
| 10090  | UST     | uronyl-2-sulfotransferase                               | 0.000867128 | Yes | Yes | No | No | No | No | No  | No  |
| 10970  | CKAP4   | cytoskeleton-associated protein 4                       | 0.000868715 | Yes | No  | No | No | No | No | No  | No  |
| 627    | BDNF    | brain-derived neurotrophic factor                       | 0.000869248 | Yes | No  | No | No | No | No | No  | No  |

|        |             |                                                                                           |             |     |     |    |    |    |     |     |     |
|--------|-------------|-------------------------------------------------------------------------------------------|-------------|-----|-----|----|----|----|-----|-----|-----|
| 57817  | HAMP        | hepocidin antimicrobial peptide                                                           | 0.000871359 | No  | Yes | No | No | No | No  | No  | No  |
| 116984 | CENTD1      | centaurin, delta 1                                                                        | 0.000873207 | Yes | No  | No | No | No | No  | No  | No  |
| 10636  | RGS14       | regulator of G-protein signaling 14                                                       | 0.000874764 | Yes | Yes | No | No | No | Yes | Yes | Yes |
| 51411  | BIN2        | bridging integrator 2                                                                     | 0.000878446 | Yes | Yes | No | No | No | No  | No  | No  |
| 84440  | RAB11FIP4   | RAB11 family interacting protein 4 (class II)                                             | 0.000880127 | Yes | No  | No | No | No | No  | No  | No  |
| 6039   | RNASE6      | ribonuclease, RNase A family, k6                                                          | 0.000883039 | Yes | No  | No | No | No | No  | No  | No  |
| 2012   | EMP1        | epithelial membrane protein 1                                                             | 0.000886408 | Yes | No  | No | No | No | No  | No  | No  |
| 7545   | ZIC1        | Zic family member 1 (odd-paired homolog, Drosophila)                                      | 0.000886569 | Yes | No  | No | No | No | No  | No  | No  |
| 9788   | MTSS1       | metastasis suppressor 1                                                                   | 0.000890249 | Yes | No  | No | No | No | No  | No  | No  |
| 7260   | TSSC1       | tumor suppressing subtransferable candidate 1                                             | 0.000902228 | No  | No  | No | No | No | Yes | No  | No  |
| 54622  | ARL15       | ADP-ribosylation factor-like 15                                                           | 0.000909608 | Yes | No  | No | No | No | No  | No  | No  |
| 84975  | MFSD5       | major facilitator superfamily domain containing 5                                         | 0.00091441  | Yes | No  | No | No | No | No  | No  | No  |
| 27235  | COQ2        | coenzyme Q2 homolog, prenyltransferase (yeast)                                            | 0.000920139 | Yes | No  | No | No | No | No  | No  | No  |
| 2246   | FGF1        | fibroblast growth factor 1 (acidic)                                                       | 0.00092103  | Yes | No  | No | No | No | No  | No  | No  |
| 23304  | UBR2        | ubiquitin protein ligase E3 component n-recognin 2                                        | 0.000922655 | Yes | No  | No | No | No | No  | No  | No  |
| 10929  | SFRS2B      | splicing factor, arginine/serine-rich 2B                                                  | 0.000922786 | Yes | No  | No | No | No | No  | No  | No  |
| 5045   | FURIN       | furin (paired basic amino acid cleaving enzyme)                                           | 0.000926034 | Yes | No  | No | No | No | No  | No  | No  |
| 374655 | ZNF710      | zinc finger protein 710                                                                   | 0.000929297 | Yes | No  | No | No | No | No  | No  | No  |
| 10399  | GNB2L1      | guanine nucleotide binding protein (G protein), beta polypeptide 2-like 1                 | 0.000937586 | No  | No  | No | No | No | Yes | No  | No  |
| 5134   | PDCD2       | programmed cell death 2                                                                   | 0.000938681 | Yes | No  | No | No | No | No  | No  | No  |
| 7307   | U2AF1       | U2 small nuclear RNA auxiliary factor 1                                                   | 0.000943538 | Yes | No  | No | No | No | No  | No  | No  |
| 56034  | PDGFC       | platelet derived growth factor C                                                          | 0.000945248 | Yes | No  | No | No | No | No  | No  | No  |
| 85456  | TNKS1BP1    | tankyrase 1 binding protein 1, 182kDa                                                     | 0.000945283 | Yes | No  | No | No | No | No  | No  | No  |
| 9166   | EBAG9       | estrogen receptor binding site associated, antigen, 9                                     | 0.000950263 | No  | No  | No | No | No | Yes | No  | No  |
| 3783   | KCNN4       | potassium intermediate/small conductance calcium-activated channel, subfamily N, member 4 | 0.000951739 | Yes | No  | No | No | No | No  | No  | No  |
| 165    | AEBP1       | AE binding protein 1                                                                      | 0.000954592 | Yes | No  | No | No | No | No  | No  | No  |
| 23254  | RP1-21O18.1 | kazrin                                                                                    | 0.000963103 | Yes | No  | No | No | No | No  | No  | No  |
| 3229   | HOXC13      | homeobox C13                                                                              | 0.000975262 | Yes | No  | No | No | No | No  | No  | No  |
| 348654 | GEN1        | Gen homolog 1, endonuclease (Drosophila)                                                  | 0.000980662 | NA  | No  | No | No | No | Yes | No  | No  |
| 64747  | MFSD1       | major facilitator superfamily domain containing 1                                         | 0.00098391  | Yes | No  | No | No | No | No  | No  | No  |
| 9889   | ZBED4       | zinc finger, BED-type containing 4                                                        | 0.000988173 | Yes | No  | No | No | No | No  | No  | No  |
| 7699   | ZNF140      | zinc finger protein 140                                                                   | 0.000989556 | Yes | No  | No | No | No | No  | No  | No  |
| 26168  | SENP3       | SUMO1/sentrin/SMT3 specific peptidase 3                                                   | 0.000990083 | No  | No  | No | No | No | Yes | No  | No  |
| 127018 | LYPLAL1     | lysophospholipase-like 1                                                                  | 0.000992616 | No  | Yes | No | No | No | No  | No  | No  |

|        |          |                                                                       |             |     |     |    |    |    |    |     |     |
|--------|----------|-----------------------------------------------------------------------|-------------|-----|-----|----|----|----|----|-----|-----|
| 124460 | SNX20    | sorting nexin 20                                                      | 0.000996154 | Yes | No  | No | No | No | No | No  | No  |
| 152926 | PPM1K    | protein phosphatase 1K (PP2C domain containing)                       | 0.000997464 | Yes | No  | No | No | No | No | No  | No  |
| 23670  | TMEM2    | transmembrane protein 2                                               | 0.000999127 | Yes | No  | No | No | No | No | No  | No  |
| 5292   | PIM1     | pim-1 oncogene                                                        | 0.00100187  | No  | No  | No | No | No | No | Yes | No  |
| 54758  | KLHDC4   | kelch domain containing 4                                             | 0.00100274  | No  | No  | No | No | No | No | Yes | No  |
| 160762 | CDC63    | coiled-coil domain containing 63                                      | 0.00100349  | No  | Yes | No | No | No | No | No  | No  |
| 309    | ANXA6    | annexin A6                                                            | 0.00101084  | Yes | Yes | No | No | No | No | No  | No  |
| 55277  | FGGY     | FGGY carbohydrate kinase domain containing                            | 0.00102064  | No  | Yes | No | No | No | No | No  | No  |
| 5306   | PITPNA   | phosphatidylinositol transfer protein, alpha                          | 0.0010226   | Yes | Yes | No | No | No | No | No  | No  |
| 9692   | KIAA0391 | KIAA0391                                                              | 0.00102376  | No  | No  | No | No | No | No | Yes | No  |
| 85461  | TANC1    | tetratricopeptide repeat, ankyrin repeat and coiled-coil containing 1 | 0.00102623  | Yes | No  | No | No | No | No | No  | No  |
| 57120  | GOPC     | golgi associated PDZ and coiled-coil motif containing                 | 0.00102884  | No  | No  | No | No | No | No | Yes | No  |
| 3705   | ITPK1    | inositol 1,3,4-trisphosphate 5/6 kinase                               | 0.00103159  | Yes | No  | No | No | No | No | Yes | Yes |
| 83872  | HMCN1    | hemicentin 1                                                          | 0.00103791  | No  | Yes | No | No | No | No | No  | No  |
| 23274  | CLEC16A  | C-type lectin domain family 16, member A                              | 0.0010388   | Yes | No  | No | No | No | No | No  | No  |
| 6909   | TBX2     | T-box 2                                                               | 0.0010406   | Yes | No  | No | No | No | No | No  | No  |
| 10401  | PIAS3    | protein inhibitor of activated STAT, 3                                | 0.00104391  | No  | No  | No | No | No | No | Yes | No  |
| 133746 | JMY      | junction-mediating and regulatory protein                             | 0.00104397  | Yes | No  | No | No | No | No | No  | No  |
| 760    | CA2      | carbonic anhydrase II                                                 | 0.0010468   | Yes | No  | No | No | No | No | No  | No  |
| 144453 | BEST3    | bestrophin 3                                                          | 0.00105046  | Yes | No  | No | No | No | No | No  | No  |
| 9588   | PRDX6    | peroxiredoxin 6                                                       | 0.00105372  | No  | Yes | No | No | No | No | No  | No  |
| 51287  | CHCHD8   | coiled-coil-helix-coiled-coil-helix domain containing 8               | 0.00105807  | Yes | No  | No | No | No | No | Yes | No  |
| 537    | ATP6AP1  | ATPase, H+ transporting, lysosomal accessory protein 1                | 0.00105829  | Yes | No  | No | No | No | No | No  | No  |
| 57514  | CDGAP    | Cdc42 GTPase-activating protein                                       | 0.00106107  | Yes | No  | No | No | No | No | No  | No  |
| 56648  | EIF5A2   | eukaryotic translation initiation factor 5A2                          | 0.00106636  | No  | No  | No | No | No | No | Yes | No  |
| 5445   | PON2     | paraoxonase 2                                                         | 0.00106903  | Yes | No  | No | No | No | No | No  | No  |
| 23309  | SIN3B    | SIN3 homolog B, transcription regulator (yeast)                       | 0.00107076  | Yes | No  | No | No | No | No | No  | No  |
| 2530   | FUT8     | fucosyltransferase 8 (alpha (1,6) fucosyltransferase)                 | 0.00107523  | Yes | Yes | No | No | No | No | No  | No  |
| 9765   | ZFYVE16  | zinc finger, FYVE domain containing 16                                | 0.00108091  | Yes | No  | No | No | No | No | No  | No  |
| 57863  | CADM3    | cell adhesion molecule 3                                              | 0.00108356  | Yes | No  | No | No | No | No | No  | No  |
| 2580   | GAK      | cyclin G associated kinase                                            | 0.00108649  | Yes | No  | No | No | No | No | Yes | No  |
| 23593  | HEBP2    | heme binding protein 2                                                | 0.0010866   | Yes | Yes | No | No | No | No | Yes | No  |
| 11143  | MYST2    | MYST histone acetyltransferase 2                                      | 0.00108955  | No  | No  | No | No | No | No | Yes | Yes |
| 27352  | SGSM3    | small G protein signaling modulator 3                                 | 0.00109403  | Yes | No  | No | No | No | No | No  | No  |

|        |          |                                                                 |            |     |     |    |    |    |     |     |     |
|--------|----------|-----------------------------------------------------------------|------------|-----|-----|----|----|----|-----|-----|-----|
| 51667  | NUB1     | negative regulator of ubiquitin-like proteins 1                 | 0.00110559 | Yes | No  | No | No | No | No  | No  | No  |
| 57118  | CAMK1D   | calcium/calmodulin-dependent protein kinase ID                  | 0.00110758 | Yes | No  | No | No | No | No  | No  | No  |
| 112616 | CMTM7    | CKLF-like MARVEL transmembrane domain containing 7              | 0.00111154 | Yes | No  | No | No | No | No  | No  | No  |
| 3556   | IL1RAP   | interleukin 1 receptor accessory protein                        | 0.00111175 | Yes | No  | No | No | No | No  | No  | No  |
| 147138 | TMC8     | transmembrane channel-like 8                                    | 0.00111703 | Yes | No  | No | No | No | No  | No  | No  |
| 526    | ATP6V1B2 | ATPase, H+ transporting, lysosomal 56/58kDa, V1 subunit B2      | 0.00112253 | No  | No  | No | No | No | Yes | No  | No  |
| 84450  | ZNF512   | zinc finger protein 512                                         | 0.00112309 | No  | Yes | No | No | No | No  | No  | No  |
| 4149   | MAX      | MYC associated factor X                                         | 0.00112317 | Yes | No  | No | No | No | No  | No  | No  |
| 55149  | PAPD1    | PAP associated domain containing 1                              | 0.00112425 | No  | No  | No | No | No | Yes | No  | No  |
| 5579   | PRKCB1   | protein kinase C, beta 1                                        | 0.00113177 | Yes | No  | No | No | No | No  | No  | No  |
| 50853  | VILL     | villin-like                                                     | 0.00113296 | Yes | No  | No | No | No | No  | No  | No  |
| 4708   | NDUFB2   | NADH dehydrogenase (ubiquinone) 1 beta subcomplex, 2, 8kDa      | 0.00113312 | Yes | No  | No | No | No | No  | No  | No  |
| 8565   | YARS     | tyrosyl-tRNA synthetase                                         | 0.00113765 | No  | No  | No | No | No | Yes | No  | No  |
| 825    | CAPN3    | calpain 3, (p94)                                                | 0.00114046 | Yes | No  | No | No | No | Yes | Yes | Yes |
| 939    | CD27     | CD27 molecule                                                   | 0.00114506 | No  | No  | No | No | No | Yes | No  | No  |
| 3988   | LIPA     | lipase A, lysosomal acid, cholesterol esterase (Wolman disease) | 0.00114598 | Yes | No  | No | No | No | No  | No  | No  |
| 90427  | BMF      | Bcl2 modifying factor                                           | 0.00114826 | Yes | Yes | No | No | No | No  | No  | No  |
| 5796   | PTPRK    | protein tyrosine phosphatase, receptor type, K                  | 0.00115437 | Yes | No  | No | No | No | No  | No  | No  |
| 64779  | MTHFSD   | methenyltetrahydrofolate synthetase domain containing           | 0.00115471 | Yes | No  | No | No | No | No  | No  | No  |
| 118429 | ANTXR2   | anthrax toxin receptor 2                                        | 0.00115676 | Yes | No  | No | No | No | No  | No  | No  |
| 146540 | ZNF785   | zinc finger protein 785                                         | 0.00115709 | Yes | No  | No | No | No | No  | No  | No  |
| 171425 | CLYBL    | citrate lyase beta like                                         | 0.00115954 | Yes | No  | No | No | No | Yes | No  | No  |
| 219749 | ZNF25    | zinc finger protein 25                                          | 0.00116095 | Yes | No  | No | No | No | No  | No  | No  |
| 5261   | PHKG2    | phosphorylase kinase, gamma 2 (testis)                          | 0.00116259 | Yes | No  | No | No | No | No  | No  | No  |
| 2743   | GLRB     | glycine receptor, beta                                          | 0.00116413 | Yes | No  | No | No | No | No  | No  | No  |
| 51163  | DBR1     | debranching enzyme homolog 1 (S. cerevisiae)                    | 0.00116485 | Yes | No  | No | No | No | No  | No  | No  |
| 5611   | DNAJC3   | DnaJ (Hsp40) homolog, subfamily C, member 3                     | 0.00116868 | No  | No  | No | No | No | Yes | No  | No  |
| 23001  | WDFY3    | WD repeat and FYVE domain containing 3                          | 0.00116922 | Yes | No  | No | No | No | No  | No  | No  |
| 6197   | RPS6KA3  | ribosomal protein S6 kinase, 90kDa, polypeptide 3               | 0.00117038 | Yes | No  | No | No | No | No  | No  | No  |
| 144165 | PRICKLE1 | prickle homolog 1 (Drosophila)                                  | 0.00117044 | Yes | No  | No | No | No | No  | No  | No  |
| 79817  | MOBK12B  | MOB1, Mps One Binder kinase activator-like 2B (yeast)           | 0.00117498 | Yes | Yes | No | No | No | No  | No  | No  |
| 22822  | PHLDA1   | pleckstrin homology-like domain, family A, member 1             | 0.00117784 | Yes | No  | No | No | No | Yes | No  | No  |
| 56882  | CDC42SE1 | CDC42 small effector 1                                          | 0.00117861 | Yes | No  | No | No | No | No  | No  | No  |
| 9477   | MED20    | mediator complex subunit 20                                     | 0.00117982 | No  | No  | No | No | No | Yes | No  | No  |

|        |          |                                                                                                                 |            |     |     |    |    |    |     |     |     |
|--------|----------|-----------------------------------------------------------------------------------------------------------------|------------|-----|-----|----|----|----|-----|-----|-----|
| 8082   | SSPN     | sarcospan (Kras oncogene-associated gene)                                                                       | 0.00117983 | Yes | No  | No | No | No | No  | No  | No  |
| 10241  | CALCOCO2 | calcium binding and coiled-coil domain 2                                                                        | 0.00118048 | Yes | No  | No | No | No | No  | No  | No  |
| 574040 | SNORA6   | small nucleolar RNA, H/ACA box 6                                                                                | 0.00118147 | NA* | Yes | No | No | No | No  | No  | No  |
| 84735  | CNDP1    | carnosine dipeptidase 1 (metallopeptidase M20 family)                                                           | 0.00118506 | No  | Yes | No | No | No | No  | No  | No  |
| 2669   | GEM      | GTP binding protein overexpressed in skeletal muscle                                                            | 0.00119005 | Yes | No  | No | No | No | No  | No  | No  |
| 58499  | ZNF462   | zinc finger protein 462                                                                                         | 0.00119031 | Yes | No  | No | No | No | No  | No  | No  |
| 25989  | ULK3     | unc-51-like kinase 3 (C. elegans)                                                                               | 0.00119493 | Yes | No  | No | No | No | No  | No  | No  |
| 6721   | SREBF2   | sterol regulatory element binding transcription factor 2                                                        | 0.00119521 | No  | Yes | No | No | No | Yes | No  | No  |
| 1650   | DDOST    | dolichyl-diphosphooligosaccharide-protein glycosyltransferase                                                   | 0.00120226 | No  | Yes | No | No | No | No  | No  | No  |
| 328    | APEX1    | APEX nuclease (multifunctional DNA repair enzyme) 1                                                             | 0.00120236 | No  | No  | No | No | No | Yes | Yes | Yes |
| 347734 | SLC35B2  | solute carrier family 35, member B2                                                                             | 0.00120479 | No  | No  | No | No | No | Yes | No  | No  |
| 131096 | KCNH8    | potassium voltage-gated channel, subfamily H (eag-related), member 8                                            | 0.00120907 | Yes | No  | No | No | No | Yes | No  | No  |
| 51332  | SPTBN5   | spectrin, beta, non-erythrocytic 5                                                                              | 0.00121203 | Yes | No  | No | No | No | No  | No  | No  |
| 55281  | TMEM140  | transmembrane protein 140                                                                                       | 0.00121369 | Yes | Yes | No | No | No | Yes | No  | No  |
| 57489  | ODF2L    | outer dense fiber of sperm tails 2-like                                                                         | 0.0012194  | Yes | No  | No | No | No | No  | No  | No  |
| 10390  | CEPT1    | choline/ethanolamine phosphotransferase 1                                                                       | 0.00122923 | Yes | Yes | No | No | No | No  | No  | No  |
| 8942   | KYNU     | kynureninase (L-kynurenine hydrolase)                                                                           | 0.00122994 | Yes | Yes | No | No | No | No  | No  | No  |
| 131450 | CD200R1  | CD200 receptor 1                                                                                                | 0.00123201 | Yes | No  | No | No | No | No  | No  | No  |
| 54879  | ST7L     | suppression of tumorigenicity 7 like                                                                            | 0.00123304 | No  | No  | No | No | No | Yes | No  | No  |
| 10345  | TRDN     | triadin                                                                                                         | 0.0012343  | No  | Yes | No | No | No | No  | No  | No  |
| 3482   | IGF2R    | insulin-like growth factor 2 receptor                                                                           | 0.00124205 | Yes | Yes | No | No | No | No  | No  | No  |
| 51804  | SIX4     | SIX homeobox 4                                                                                                  | 0.00124244 | Yes | No  | No | No | No | No  | No  | No  |
| 10507  | SEMA4D   | sema domain, immunoglobulin domain (Ig), transmembrane domain (TM) and short cytoplasmic domain (semaphorin) 4D | 0.00124309 | Yes | No  | No | No | No | No  | No  | No  |
| 80820  | EEP1     | endonuclease/exonuclease/phosphatase family domain containing 1                                                 | 0.00125023 | No  | No  | No | No | No | Yes | No  | No  |
| 5581   | PRKCE    | protein kinase C, epsilon                                                                                       | 0.00125242 | Yes | No  | No | No | No | No  | No  | No  |
| 6883   | TAF12    | TAF12 RNA polymerase II, TATA box binding protein (TBP)-associated factor, 20kDa                                | 0.00126343 | No  | No  | No | No | No | Yes | No  | No  |
| 1657   | DMXL1    | Dmx-like 1                                                                                                      | 0.0012638  | Yes | No  | No | No | No | No  | No  | No  |
| 2737   | GLI3     | GLI-Kruppel family member GLI3 (Greig cephalopolysyndactyly syndrome)                                           | 0.00127163 | Yes | No  | No | No | No | No  | No  | No  |
| 64236  | PDLIM2   | PDZ and LIM domain 2 (mystique)                                                                                 | 0.00127253 | Yes | No  | No | No | No | No  | No  | No  |
| 57406  | ABHD6    | abhydrolase domain containing 6                                                                                 | 0.00127482 | Yes | Yes | No | No | No | No  | No  | No  |
| 10385  | BTN2A2   | butyrophilin, subfamily 2, member A2                                                                            | 0.00128246 | Yes | No  | No | No | No | No  | No  | No  |
| 22920  | KIFAP3   | kinesin-associated protein 3                                                                                    | 0.00128275 | Yes | No  | No | No | No | No  | No  | No  |
| 114134 | SLC2A13  | solute carrier family 2 (facilitated glucose transporter), member 13                                            | 0.0012861  | Yes | No  | No | No | No | No  | No  | No  |
| 902    | CCNH     | cyclin H                                                                                                        | 0.0012862  | Yes | No  | No | No | No | No  | No  | No  |

|        |          |                                                                                                                                         |            |     |     |    |    |    |     |     |     |
|--------|----------|-----------------------------------------------------------------------------------------------------------------------------------------|------------|-----|-----|----|----|----|-----|-----|-----|
| 493    | ATP2B4   | ATPase, Ca++ transporting, plasma membrane 4                                                                                            | 0.00129309 | Yes | No  | No | No | No | No  | No  | No  |
| 5318   | PKP2     | plakophilin 2                                                                                                                           | 0.00129354 | Yes | No  | No | No | No | No  | No  | No  |
| 84950  | PRPF38A  | PRPF38 pre-mRNA processing factor 38 (yeast) domain containing A                                                                        | 0.00129666 | No  | No  | No | No | No | Yes | No  | No  |
| 55568  | GALNT10  | UDP-N-acetyl-alpha-D-galactosamine:polypeptide N-acetylgalactosaminyltransferase 10 (GalNAc-T10)                                        | 0.00130017 | Yes | Yes | No | No | No | Yes | Yes | Yes |
| 10848  | PPP1R13L | protein phosphatase 1, regulatory (inhibitor) subunit 13 like                                                                           | 0.00130497 | No  | No  | No | No | No | Yes | No  | No  |
| 4606   | MYBPC2   | myosin binding protein C, fast type                                                                                                     | 0.00130649 | Yes | No  | No | No | No | No  | No  | No  |
| 1973   | EIF4A1   | eukaryotic translation initiation factor 4A, isoform 1                                                                                  | 0.00130852 | Yes | No  | No | No | No | No  | No  | No  |
| 395    | ARHGAP6  | Rho GTPase activating protein 6                                                                                                         | 0.00130913 | Yes | No  | No | No | No | No  | No  | No  |
| 55035  | NOL8     | nucleolar protein 8                                                                                                                     | 0.00131316 | No  | No  | No | No | No | Yes | No  | No  |
| 5253   | PHF2     | PHD finger protein 2                                                                                                                    | 0.00131455 | Yes | No  | No | No | No | No  | No  | No  |
| 3077   | HFE      | hemochromatosis                                                                                                                         | 0.00132146 | Yes | No  | No | No | No | No  | No  | No  |
| 1837   | DTNA     | dystrobrevin, alpha                                                                                                                     | 0.00133485 | Yes | No  | No | No | No | No  | No  | No  |
| 10365  | KLF2     | Kruppel-like factor 2 (lung)                                                                                                            | 0.00134557 | Yes | No  | No | No | No | No  | No  | No  |
| 221498 | KIF6     | kinesin family member 6                                                                                                                 | 0.00135884 | Yes | No  | No | No | No | No  | No  | No  |
| 9422   | ZNF264   | zinc finger protein 264                                                                                                                 | 0.00136021 | Yes | No  | No | No | No | Yes | Yes | Yes |
| 79413  | ZBED2    | zinc finger, BED-type containing 2                                                                                                      | 0.00136123 | Yes | No  | No | No | No | No  | No  | No  |
| 126820 | WDR63    | WD repeat domain 63                                                                                                                     | 0.00136206 | Yes | No  | No | No | No | No  | No  | No  |
| 389136 | VGLL3    | vestigial like 3 (Drosophila)                                                                                                           | 0.00136577 | Yes | No  | No | No | No | No  | No  | No  |
| 27161  | EIF2C2   | eukaryotic translation initiation factor 2C, 2                                                                                          | 0.00136692 | Yes | No  | No | No | No | No  | No  | No  |
| 63874  | ABHD4    | abhydrolase domain containing 4                                                                                                         | 0.00136955 | Yes | Yes | No | No | No | No  | No  | No  |
| 1131   | CHRM3    | cholinergic receptor, muscarinic 3                                                                                                      | 0.00138791 | Yes | No  | No | No | No | No  | No  | No  |
| 3882   | KRT32    | keratin 32                                                                                                                              | 0.00138952 | Yes | No  | No | No | No | No  | No  | No  |
| 7694   | ZNF135   | zinc finger protein 135                                                                                                                 | 0.00139209 | Yes | No  | No | No | No | No  | No  | No  |
| 10955  | SERINC3  | serine incorporator 3                                                                                                                   | 0.00140233 | No  | Yes | No | No | No | No  | No  | No  |
| 1043   | CD52     | CD52 molecule                                                                                                                           | 0.00141918 | Yes | No  | No | No | No | Yes | Yes | Yes |
| 91544  | UBXD5    | UBX domain containing 5                                                                                                                 | 0.00141918 | Yes | No  | No | No | No | Yes | No  | No  |
| 55663  | ZNF446   | zinc finger protein 446                                                                                                                 | 0.00142093 | Yes | No  | No | No | No | No  | No  | No  |
| 9568   | GABBR2   | gamma-aminobutyric acid (GABA) B receptor, 2                                                                                            | 0.00142254 | Yes | No  | No | No | No | No  | No  | No  |
| 222521 | C6orf224 | chromosome 6 open reading frame 224                                                                                                     | 0.00142265 | Yes | No  | No | No | No | No  | No  | No  |
| 5970   | RELA     | v-rel reticuloendotheliosis viral oncogene homolog A, nuclear factor of kappa light polypeptide gene enhancer in B-cells 3, p65 (avian) | 0.00142459 | Yes | No  | No | No | No | No  | No  | No  |
| 51256  | TBC1D7   | TBC1 domain family, member 7                                                                                                            | 0.00142851 | No  | No  | No | No | No | Yes | No  | No  |
| 3514   | IGKC     | immunoglobulin kappa constant                                                                                                           | 0.00143326 | Yes | No  | No | No | No | No  | No  | No  |
| 2175   | FANCA    | Fanconi anemia, complementation group A                                                                                                 | 0.00143405 | No  | Yes | No | No | No | No  | No  | No  |
| 92241  | RCSD1    | RCSD domain containing 1                                                                                                                | 0.00144054 | Yes | No  | No | No | No | No  | No  | No  |

|        |          |                                                                                        |            |     |     |    |    |    |    |     |    |
|--------|----------|----------------------------------------------------------------------------------------|------------|-----|-----|----|----|----|----|-----|----|
| 648    | BMI1     | BMI1 polycomb ring finger oncogene                                                     | 0.00144109 | Yes | No  | No | No | No | No | No  | No |
| 10397  | NDRG1    | N-myc downstream regulated gene 1                                                      | 0.00144122 | Yes | No  | No | No | No | No | No  | No |
| 389792 | IERSL    | immediate early response 5-like                                                        | 0.00144123 | Yes | No  | No | No | No | No | No  | No |
| 23585  | TMEM50A  | transmembrane protein 50A                                                              | 0.00144324 | Yes | No  | No | No | No | No | Yes | No |
| 473    | RERE     | arginine-glutamic acid dipeptide (RE) repeats                                          | 0.00144519 | Yes | No  | No | No | No | No | No  | No |
| 60437  | CDH26    | cadherin-like 26                                                                       | 0.00144673 | Yes | No  | No | No | No | No | No  | No |
| 8651   | SOCS1    | suppressor of cytokine signalling 1                                                    | 0.00145106 | No  | No  | No | No | No | No | Yes | No |
| 610    | HCN2     | hyperpolarization activated cyclic nucleotide-gated potassium channel 2                | 0.00145353 | No  | Yes | No | No | No | No | No  | No |
| 1180   | CLCN1    | chloride channel 1, skeletal muscle (Thomsen disease, autosomal dominant)              | 0.00145988 | Yes | No  | No | No | No | No | No  | No |
| 84817  | TXNDC17  | thioredoxin domain containing 17                                                       | 0.00146355 | No  | No  | No | No | No | No | Yes | No |
| 9851   | KIAA0753 | KIAA0753                                                                               | 0.00146355 | No  | No  | No | No | No | No | Yes | No |
| 11282  | MGAT4B   | mannosyl (alpha-1,3-)-glycoprotein beta-1,4-N-acetylglucosaminyltransferase, isozyme B | 0.00146922 | Yes | No  | No | No | No | No | No  | No |
| 6348   | CCL3     | chemokine (C-C motif) ligand 3                                                         | 0.00149039 | Yes | No  | No | No | No | No | Yes | No |
| 10491  | CRTAP    | cartilage associated protein                                                           | 0.00150139 | Yes | No  | No | No | No | No | No  | No |
| 9984   | THOC1    | THO complex 1                                                                          | 0.00150221 | No  | No  | No | No | No | No | Yes | No |
| 3839   | KPNA3    | karyopherin alpha 3 (importin alpha 4)                                                 | 0.00150624 | Yes | No  | No | No | No | No | No  | No |
| 80309  | SPHKAP   | SPHK1 interactor, AKAP domain containing                                               | 0.00151044 | Yes | No  | No | No | No | No | No  | No |
| 169792 | GLIS3    | GLIS family zinc finger 3                                                              | 0.00151177 | Yes | No  | No | No | No | No | No  | No |
| 716    | C1S      | complement component 1, s subcomponent                                                 | 0.00151516 | Yes | No  | No | No | No | No | No  | No |
| 1746   | DLX2     | distal-less homeobox 2                                                                 | 0.00152069 | No  | No  | No | No | No | No | Yes | No |
| 57689  | LRRC4C   | leucine rich repeat containing 4C                                                      | 0.00152755 | Yes | No  | No | No | No | No | No  | No |
| 554    | AVPR2    | arginine vasopressin receptor 2 (nephrogenic diabetes insipidus)                       | 0.00152835 | Yes | No  | No | No | No | No | No  | No |
| 4055   | LTBR     | lymphotoxin beta receptor (TNFR superfamily, member 3)                                 | 0.00152847 | Yes | No  | No | No | No | No | No  | No |
| 254042 | MAP1D    | methionine aminopeptidase 1D                                                           | 0.0015287  | Yes | No  | No | No | No | No | No  | No |
| 127733 | UBXD3    | UBX domain containing 3                                                                | 0.00153325 | Yes | No  | No | No | No | No | No  | No |
| 79840  | NHEJ1    | nonhomologous end-joining factor 1                                                     | 0.00153717 | Yes | No  | No | No | No | No | No  | No |
| 3824   | KLRD1    | killer cell lectin-like receptor subfamily D, member 1                                 | 0.00154874 | Yes | No  | No | No | No | No | No  | No |
| 27334  | P2RY10   | purinergic receptor P2Y, G-protein coupled, 10                                         | 0.0015502  | Yes | Yes | No | No | No | No | No  | No |
| 122773 | KLHDC1   | kelch domain containing 1                                                              | 0.00155066 | Yes | No  | No | No | No | No | No  | No |
| 90102  | PHLDB2   | pleckstrin homology-like domain, family B, member 2                                    | 0.0015545  | Yes | No  | No | No | No | No | No  | No |
| 121601 | TMEM16D  | transmembrane protein 16D                                                              | 0.001561   | Yes | No  | No | No | No | No | No  | No |
| 257641 | NPC1     | Nasopharyngeal carcinoma 1                                                             | 0.00156118 | NA  | No  | No | No | No | No | Yes | No |
| 64224  | HERPUD2  | HERPUD family member 2                                                                 | 0.00156456 | Yes | Yes | No | No | No | No | No  | No |
| 54861  | SNRK     | SNF related kinase                                                                     | 0.00158631 | Yes | No  | No | No | No | No | No  | No |



|        |          |                                                                                              |            |     |     |    |    |    |     |    |    |
|--------|----------|----------------------------------------------------------------------------------------------|------------|-----|-----|----|----|----|-----|----|----|
| 8861   | LDB1     | LIM domain binding 1                                                                         | 0.00158975 | Yes | No  | No | No | No | No  | No | No |
| 10526  | IPO8     | importin 8                                                                                   | 0.00159231 | No  | No  | No | No | No | Yes | No | No |
| 8458   | TTF2     | transcription termination factor, RNA polymerase II                                          | 0.00160583 | No  | No  | No | No | No | Yes | No | No |
| 132160 | PPM1M    | protein phosphatase 1M (PP2C domain containing)                                              | 0.00160586 | Yes | No  | No | No | No | No  | No | No |
| 5683   | PSMA2    | proteasome (prosome, macropain) subunit, alpha type, 2                                       | 0.00160909 | No  | No  | No | No | No | Yes | No | No |
| 10914  | PAPOLA   | poly(A) polymerase alpha                                                                     | 0.00161536 | Yes | No  | No | No | No | No  | No | No |
| 6638   | SNRPN    | small nuclear ribonucleoprotein polypeptide N                                                | 0.00162424 | Yes | No  | No | No | No | No  | No | No |
| 56252  | ASXL2    | additional sex combs like 2 (Drosophila)                                                     | 0.00162509 | Yes | No  | No | No | No | No  | No | No |
| 9170   | LPAR2    | lysophosphatidic acid receptor 2                                                             | 0.00162617 | Yes | No  | No | No | No | No  | No | No |
| 5498   | PPOX     | protoporphyrinogen oxidase                                                                   | 0.00162722 | Yes | No  | No | No | No | No  | No | No |
| 22838  | RNF44    | ring finger protein 44                                                                       | 0.0016312  | Yes | No  | No | No | No | No  | No | No |
| 50717  | WDR42A   | WD repeat domain 42A                                                                         | 0.00163186 | Yes | No  | No | No | No | No  | No | No |
| 2038   | EPB42    | erythrocyte membrane protein band 4.2                                                        | 0.00163565 | Yes | No  | No | No | No | No  | No | No |
| 79922  | MRM1     | mitochondrial rRNA methyltransferase 1 homolog (S. cerevisiae)                               | 0.00163569 | No  | No  | No | No | No | Yes | No | No |
| 8671   | SLC4A4   | solute carrier family 4, sodium bicarbonate cotransporter, member 4                          | 0.00163833 | Yes | No  | No | No | No | No  | No | No |
| 123879 | DCUN1D3  | DCN1, defective in cullin neddylation 1, domain containing 3 (S. cerevisiae)                 | 0.00164076 | No  | No  | No | No | No | Yes | No | No |
| 8836   | GGH      | gamma-glutamyl hydrolase (conjugase, foyl/polyglutamyl hydrolase)                            | 0.00165136 | No  | Yes | No | No | No | No  | No | No |
| 6775   | STAT4    | signal transducer and activator of transcription 4                                           | 0.00165487 | Yes | No  | No | No | No | No  | No | No |
| 56937  | PMEP1    | prostate transmembrane protein, androgen induced 1                                           | 0.00165609 | Yes | No  | No | No | No | No  | No | No |
| 54629  | FAM63B   | family with sequence similarity 63, member B                                                 | 0.00165964 | Yes | No  | No | No | No | No  | No | No |
| 220164 | DOK6     | docking protein 6                                                                            | 0.00166522 | Yes | No  | No | No | No | No  | No | No |
| 84419  | C15orf48 | chromosome 15 open reading frame 48                                                          | 0.00167549 | Yes | No  | No | No | No | No  | No | No |
| 2135   | EXTL2    | exostosins (multiple)-like 2                                                                 | 0.00167772 | Yes | Yes | No | No | No | Yes | No | No |
| 11168  | PSIP1    | PC4 and SFRS1 interacting protein 1                                                          | 0.00168887 | No  | No  | No | No | No | Yes | No | No |
| 84875  | PARP10   | poly (ADP-ribose) polymerase family, member 10                                               | 0.0016894  | Yes | No  | No | No | No | No  | No | No |
| 8814   | CDKL1    | cyclin-dependent kinase-like 1 (CDC2-related kinase)                                         | 0.00170012 | Yes | No  | No | No | No | No  | No | No |
| 25946  | ZNF385A  | zinc finger protein 385A                                                                     | 0.00170016 | Yes | No  | No | No | No | No  | No | No |
| 4832   | NME3     | non-metastatic cells 3, protein expressed in                                                 | 0.00170334 | Yes | No  | No | No | No | No  | No | No |
| 55176  | SEC61A2  | Sec61 alpha 2 subunit (S. cerevisiae)                                                        | 0.00170515 | Yes | No  | No | No | No | No  | No | No |
| 2548   | GAA      | glucosidase, alpha; acid (Pompe disease, glycogen storage disease type II)                   | 0.00170784 | Yes | No  | No | No | No | No  | No | No |
| 10307  | APBB3    | amyloid beta (A4) precursor protein-binding, family B, member 3                              | 0.00171117 | Yes | No  | No | No | No | Yes | No | No |
| 3101   | HK3      | hexokinase 3 (white cell)                                                                    | 0.00172382 | Yes | No  | No | No | No | No  | No | No |
| 59338  | PLEKHA1  | pleckstrin homology domain containing, family A (phosphoinositide binding specific) member 1 | 0.00172709 | Yes | No  | No | No | No | No  | No | No |
| 79712  | GTDC1    | glycosyltransferase-like domain containing 1                                                 | 0.00172806 | No  | Yes | No | No | No | No  | No | No |

|        |          |                                                                                         |            |     |     |    |    |    |     |     |     |
|--------|----------|-----------------------------------------------------------------------------------------|------------|-----|-----|----|----|----|-----|-----|-----|
| 80003  | PCNXL2   | pecanex-like 2 (Drosophila)                                                             | 0.00172835 | Yes | No  | No | No | No | No  | No  | No  |
| 23152  | CIC      | capicua homolog (Drosophila)                                                            | 0.00173739 | No  | No  | No | No | No | Yes | No  | No  |
| 2132   | EXT2     | exostosins (multiple) 2                                                                 | 0.00174439 | No  | Yes | No | No | No | No  | No  | No  |
| 27128  | PSCD4    | pleckstrin homology, Sec7 and coiled-coil domains 4                                     | 0.00174702 | Yes | No  | No | No | No | No  | No  | No  |
| 55968  | NSFL1C   | NSFL1 (p97) cofactor (p47)                                                              | 0.00174818 | Yes | No  | No | No | No | No  | No  | No  |
| 6139   | RPL17    | ribosomal protein L17                                                                   | 0.00175292 | Yes | No  | No | No | No | No  | No  | No  |
| 57452  | GALNTL1  | UDP-N-acetyl-alpha-D-galactosamine:polypeptide N-acetylgalactosaminyltransferase-like 1 | 0.00175511 | Yes | No  | No | No | No | No  | No  | No  |
| 9121   | SLC16A5  | solute carrier family 16, member 5 (monocarboxylic acid transporter 6)                  | 0.00175558 | Yes | No  | No | No | No | No  | No  | No  |
| 2512   | FTL      | ferritin, light polypeptide                                                             | 0.0017631  | Yes | No  | No | No | No | No  | No  | No  |
| 63940  | GPSM3    | G-protein signaling modulator 3 (AGS3-like, C. elegans)                                 | 0.00176839 | Yes | No  | No | No | No | No  | No  | No  |
| 80824  | DUSP16   | dual specificity phosphatase 16                                                         | 0.00177221 | Yes | No  | No | No | No | No  | No  | No  |
| 3689   | ITGB2    | integrin, beta 2 (complement component 3 receptor 3 and 4 subunit)                      | 0.00177655 | Yes | No  | No | No | No | Yes | Yes | Yes |
| 126393 | HSPB6    | heat shock protein, alpha-crystallin-related, B6                                        | 0.00177797 | Yes | No  | No | No | No | No  | No  | No  |
| 22904  | SBNO2    | strawberry notch homolog 2 (Drosophila)                                                 | 0.0017832  | Yes | No  | No | No | No | No  | No  | No  |
| 170691 | ADAMTS17 | ADAM metalloproteinase with thrombospondin type 1 motif, 17                             | 0.00178369 | Yes | No  | No | No | No | No  | No  | No  |
| 3240   | HP       | haptoglobin                                                                             | 0.00178798 | No  | Yes | No | No | No | No  | No  | No  |
| 8926   | SNURF    | SNRPN upstream reading frame                                                            | 0.00179108 | Yes | No  | No | No | No | No  | No  | No  |
| 64393  | ZMAT3    | zinc finger, matrix type 3                                                              | 0.00179608 | Yes | No  | No | No | No | No  | No  | No  |
| 79667  | FLJ13197 | hypothetical FLJ13197                                                                   | 0.00179716 | Yes | No  | No | No | No | No  | No  | No  |
| 84572  | GNPTG    | N-acetylglucosamine-1-phosphate transferase, gamma subunit                              | 0.00180605 | Yes | No  | No | No | No | No  | No  | No  |
| 682    | BSG      | basigin (Ok blood group)                                                                | 0.00181237 | No  | No  | No | No | No | Yes | No  | No  |
| 54732  | TMED9    | transmembrane emp24 protein transport domain containing 9                               | 0.00182494 | Yes | No  | No | No | No | No  | No  | No  |
| 1522   | CTS2     | cathepsin 2                                                                             | 0.00182515 | Yes | No  | No | No | No | No  | No  | No  |
| 4239   | MFAP4    | microfibrillar-associated protein 4                                                     | 0.00182614 | Yes | No  | No | No | No | No  | No  | No  |
| 5468   | PPARG    | peroxisome proliferator-activated receptor gamma                                        | 0.00182908 | Yes | No  | No | No | No | No  | No  | No  |
| 9368   | SLC9A3R1 | solute carrier family 9 (sodium/hydrogen exchanger), member 3 regulator 1               | 0.00183142 | Yes | No  | No | No | No | No  | No  | No  |
| 4338   | MOCS2    | molybdenum cofactor synthesis 2                                                         | 0.00183177 | Yes | No  | No | No | No | No  | No  | No  |
| 10519  | CIB1     | calcium and integrin binding 1 (calmyrin)                                               | 0.00183375 | Yes | No  | No | No | No | Yes | Yes | Yes |
| 430    | ASCL2    | achaete-scute complex homolog 2 (Drosophila)                                            | 0.00183794 | Yes | No  | No | No | No | No  | No  | No  |
| 8440   | NCK2     | NCK adaptor protein 2                                                                   | 0.00185016 | Yes | No  | No | No | No | No  | No  | No  |
| 255104 | TMCO4    | transmembrane and coiled-coil domains 4                                                 | 0.00185645 | Yes | No  | No | No | No | No  | No  | No  |
| 26301  | GBGT1    | glucosyltransferase alpha-1,3-N-acetylgalactosaminyltransferase 1                       | 0.00187139 | Yes | No  | No | No | No | No  | No  | No  |
| 2876   | GPX1     | glutathione peroxidase 1                                                                | 0.00187385 | Yes | No  | No | No | No | No  | No  | No  |
| 7150   | TOP1     | topoisomerase (DNA) I                                                                   | 0.00187564 | No  | Yes | No | No | No | No  | No  | No  |

|        |           |                                                                                         |            |     |     |    |    |    |     |    |    |
|--------|-----------|-----------------------------------------------------------------------------------------|------------|-----|-----|----|----|----|-----|----|----|
| 1822   | ATN1      | atrophin 1                                                                              | 0.00188508 | Yes | No  | No | No | No | No  | No | No |
| 1730   | DIAPH2    | diaphanous homolog 2 (Drosophila)                                                       | 0.00188704 | Yes | No  | No | No | No | No  | No | No |
| 10553  | HTATIP2   | HIV-1 Tat interactive protein 2, 30kDa                                                  | 0.00188772 | Yes | No  | No | No | No | No  | No | No |
| 6633   | SNRPD2    | small nuclear ribonucleoprotein D2 polypeptide 16.5kDa                                  | 0.00189669 | No  | No  | No | No | No | Yes | No | No |
| 147040 | KCTD11    | potassium channel tetramerisation domain containing 11                                  | 0.00189803 | Yes | No  | No | No | No | No  | No | No |
| 55135  | WDR79     | WD repeat domain 79                                                                     | 0.00190591 | No  | No  | No | No | No | Yes | No | No |
| 84924  | ZNF566    | zinc finger protein 566                                                                 | 0.00191538 | Yes | No  | No | No | No | No  | No | No |
| 56112  | PCDHGA3   | protocadherin gamma subfamily A, 3                                                      | 0.00191657 | No  | Yes | No | No | No | No  | No | No |
| 91     | ACVR1B    | activin A receptor, type 1B                                                             | 0.00192191 | Yes | No  | No | No | No | No  | No | No |
| 85441  | PRIC285   | peroxisomal proliferator-activated receptor A interacting complex 285                   | 0.00192309 | Yes | No  | No | No | No | No  | No | No |
| 4140   | MARK3     | MAP/microtubule affinity-regulating kinase 3                                            | 0.00192976 | Yes | No  | No | No | No | No  | No | No |
| 7036   | TFR2      | transferrin receptor 2                                                                  | 0.00193143 | Yes | No  | No | No | No | No  | No | No |
| 1308   | COL17A1   | collagen, type XVII, alpha 1                                                            | 0.00193416 | Yes | No  | No | No | No | No  | No | No |
| 3479   | IGF1      | insulin-like growth factor 1 (somatomedin C)                                            | 0.00193458 | Yes | No  | No | No | No | No  | No | No |
| 25827  | FBXL2     | F-box and leucine-rich repeat protein 2                                                 | 0.0019355  | Yes | No  | No | No | No | No  | No | No |
| 3055   | HCK       | hemopoietic cell kinase                                                                 | 0.00194302 | Yes | No  | No | No | No | Yes | No | No |
| 8034   | SLC25A16  | solute carrier family 25 (mitochondrial carrier, Graves disease autoantigen), member 16 | 0.00194711 | Yes | No  | No | No | No | No  | No | No |
| 146057 | TTBK2     | tau tubulin kinase 2                                                                    | 0.00194729 | Yes | No  | No | No | No | Yes | No | No |
| 6672   | SP100     | SP100 nuclear antigen                                                                   | 0.00195135 | Yes | Yes | No | No | No | No  | No | No |
| 7422   | VEGFA     | vascular endothelial growth factor A                                                    | 0.00197243 | Yes | No  | No | No | No | Yes | No | No |
| 389677 | RBM12B    | RNA binding motif protein 12B                                                           | 0.00198523 | No  | Yes | No | No | No | No  | No | No |
| 220441 | RNF152    | ring finger protein 152                                                                 | 0.00199067 | Yes | No  | No | No | No | No  | No | No |
| 4259   | MGST3     | microsomal glutathione S-transferase 3                                                  | 0.00200006 | Yes | No  | No | No | No | No  | No | No |
| 10785  | JARID1B   | jumonji, AT rich interactive domain 1B                                                  | 0.00200024 | Yes | No  | No | No | No | No  | No | No |
| 84705  | GTPBP3    | GTP binding protein 3 (mitochondrial)                                                   | 0.00200462 | No  | No  | No | No | No | Yes | No | No |
| 57719  | TMEM16H   | transmembrane protein 16H                                                               | 0.00200462 | No  | No  | No | No | No | Yes | No | No |
| 7850   | IL1R2     | interleukin 1 receptor, type II                                                         | 0.0020055  | Yes | No  | No | No | No | No  | No | No |
| 9094   | UNC119    | unc-119 homolog (C. elegans)                                                            | 0.00202118 | Yes | No  | No | No | No | No  | No | No |
| 5077   | PAX3      | paired box 3                                                                            | 0.00204066 | Yes | No  | No | No | No | No  | No | No |
| 7306   | TYRP1     | tyrosinase-related protein 1                                                            | 0.00205205 | Yes | No  | No | No | No | No  | No | No |
| 79924  | ADM2      | adrenomedullin 2                                                                        | 0.0020662  | No  | Yes | No | No | No | No  | No | No |
| 9767   | PHF16     | PHD finger protein 16                                                                   | 0.00206671 | Yes | No  | No | No | No | No  | No | No |
| 8341   | HIST1H2BN | histone cluster 1, H2bn                                                                 | 0.00206913 | No  | No  | No | No | No | Yes | No | No |
| 84109  | GPR103    | G protein-coupled receptor 103                                                          | 0.00207608 | Yes | No  | No | No | No | No  | No | No |

|        |          |                                                                                                |            |     |     |    |    |    |     |    |    |
|--------|----------|------------------------------------------------------------------------------------------------|------------|-----|-----|----|----|----|-----|----|----|
| 80727  | TTYH3    | tweety homolog 3 (Drosophila)                                                                  | 0.00207867 | Yes | No  | No | No | No | No  | No | No |
| 4880   | NPPC     | natriuretic peptide precursor C                                                                | 0.00209323 | Yes | No  | No | No | No | Yes | No | No |
| 79896  | THNSL1   | threonine synthase-like 1 (S. cerevisiae)                                                      | 0.00209512 | Yes | Yes | No | No | No | No  | No | No |
| 83890  | SPATA9   | spermatogenesis associated 9                                                                   | 0.00209585 | Yes | No  | No | No | No | No  | No | No |
| 10846  | PDE10A   | phosphodiesterase 10A                                                                          | 0.0020991  | Yes | No  | No | No | No | No  | No | No |
| 5198   | PFAS     | phosphoribosylformylglycinamide synthase (FGAR amidotransferase)                               | 0.0021115  | Yes | No  | No | No | No | Yes | No | No |
| 84864  | MINA     | MYC induced nuclear antigen                                                                    | 0.00212682 | Yes | No  | No | No | No | No  | No | No |
| 6239   | RREB1    | ras responsive element binding protein 1                                                       | 0.0021271  | Yes | No  | No | No | No | No  | No | No |
| 56301  | SLC7A10  | solute carrier family 7, (neutral amino acid transporter, y+ system) member 10                 | 0.00214511 | Yes | No  | No | No | No | No  | No | No |
| 157638 | FAM84B   | family with sequence similarity 84, member B                                                   | 0.00215724 | Yes | No  | No | No | No | No  | No | No |
| 27075  | TSPAN13  | tetraspanin 13                                                                                 | 0.00216413 | Yes | No  | No | No | No | No  | No | No |
| 5744   | PTHLH    | parathyroid hormone-like hormone                                                               | 0.00218771 | Yes | No  | No | No | No | No  | No | No |
| 203522 | DDX26B   | DEAD/H (Asp-Glu-Ala-Asp/His) box polypeptide 26B                                               | 0.00220712 | Yes | No  | No | No | No | No  | No | No |
| 10221  | TRIB1    | tribbles homolog 1 (Drosophila)                                                                | 0.00220733 | Yes | No  | No | No | No | No  | No | No |
| 9113   | LATS1    | LATS, large tumor suppressor, homolog 1 (Drosophila)                                           | 0.00221437 | Yes | No  | No | No | No | No  | No | No |
| 51166  | AADAT    | aminoadipate aminotransferase                                                                  | 0.00221501 | Yes | No  | No | No | No | No  | No | No |
| 50508  | NOX3     | NADPH oxidase 3                                                                                | 0.00221906 | Yes | No  | No | No | No | No  | No | No |
| 6907   | TBL1X    | transducin (beta)-like 1X-linked                                                               | 0.00221963 | Yes | No  | No | No | No | No  | No | No |
| 157    | ADRBK2   | adrenergic, beta, receptor kinase 2                                                            | 0.00222392 | Yes | Yes | No | No | No | No  | No | No |
| 60481  | ELOVL5   | ELOVL family member 5, elongation of long chain fatty acids (FEN1/Elo2, SUR4/Elo3-like, yeast) | 0.00223244 | Yes | No  | No | No | No | No  | No | No |
| 2624   | GATA2    | GATA binding protein 2                                                                         | 0.00223253 | No  | Yes | No | No | No | No  | No | No |
| 23370  | ARHGEF18 | rho/rac guanine nucleotide exchange factor (GEF) 18                                            | 0.00223409 | Yes | No  | No | No | No | No  | No | No |
| 56342  | PPAN     | peter pan homolog (Drosophila)                                                                 | 0.00223695 | No  | No  | No | No | No | Yes | No | No |
| 1952   | CELSR2   | cadherin, EGF LAG seven-pass G-type receptor 2 (flamingo homolog, Drosophila)                  | 0.00224045 | No  | Yes | No | No | No | No  | No | No |
| 4807   | NHLH1    | nescient helix loop helix 1                                                                    | 0.00224464 | Yes | No  | No | No | No | No  | No | No |
| 6497   | SKI      | v-ski sarcoma viral oncogene homolog (avian)                                                   | 0.00225888 | Yes | No  | No | No | No | No  | No | No |
| 4758   | NEU1     | sialidase 1 (lysosomal sialidase)                                                              | 0.00227432 | Yes | No  | No | No | No | No  | No | No |
| 257068 | PLCXD2   | phosphatidylinositol-specific phospholipase C, X domain containing 2                           | 0.00227793 | Yes | No  | No | No | No | No  | No | No |
| 4776   | NFATC4   | nuclear factor of activated T-cells, cytoplasmic, calcineurin-dependent 4                      | 0.00227942 | No  | No  | No | No | No | Yes | No | No |
| 23492  | CBX7     | chromobox homolog 7                                                                            | 0.0022849  | Yes | No  | No | No | No | No  | No | No |
| 9133   | CCNB2    | cyclin B2                                                                                      | 0.00229591 | No  | Yes | No | No | No | No  | No | No |
| 25978  | CHMP2B   | chromatin modifying protein 2B                                                                 | 0.00229949 | No  | No  | No | No | No | Yes | No | No |
| 5376   | PMP22    | peripheral myelin protein 22                                                                   | 0.00231978 | Yes | No  | No | No | No | No  | No | No |
| 3759   | KCNJ2    | potassium inwardly-rectifying channel, subfamily J, member 2                                   | 0.00232247 | Yes | No  | No | No | No | No  | No | No |

|        |          |                                                                                                                 |            |     |     |    |    |    |    |     |    |
|--------|----------|-----------------------------------------------------------------------------------------------------------------|------------|-----|-----|----|----|----|----|-----|----|
| 23592  | LEMD3    | LEM domain containing 3                                                                                         | 0.00232397 | Yes | No  | No | No | No | No | No  | No |
| 440400 | RNASEK   | ribonuclease, RNase K                                                                                           | 0.00232577 | No  | No  | No | No | No | No | Yes | No |
| 56990  | CDC42SE2 | CDC42 small effector 2                                                                                          | 0.00233891 | Yes | No  | No | No | No | No | No  | No |
| 60436  | TGIF2    | TGFB-induced factor homeobox 2                                                                                  | 0.00233924 | No  | No  | No | No | No | No | Yes | No |
| 26993  | AKAP8L   | A kinase (PRKA) anchor protein 8-like                                                                           | 0.00235956 | Yes | No  | No | No | No | No | No  | No |
| 4122   | MAN2A2   | mannosidase, alpha, class 2A, member 2                                                                          | 0.00236151 | Yes | No  | No | No | No | No | No  | No |
| 113540 | CMTM1    | CKLF-like MARVEL transmembrane domain containing 1                                                              | 0.00240746 | Yes | No  | No | No | No | No | No  | No |
| 5910   | RAP1GDS1 | RAP1, GTP-GDP dissociation stimulator 1                                                                         | 0.00241068 | Yes | No  | No | No | No | No | No  | No |
| 28514  | DLL1     | delta-like 1 (Drosophila)                                                                                       | 0.00243325 | Yes | No  | No | No | No | No | No  | No |
| 652    | BMP4     | bone morphogenetic protein 4                                                                                    | 0.0024345  | Yes | No  | No | No | No | No | No  | No |
| 28977  | MRPL42   | mitochondrial ribosomal protein L42                                                                             | 0.00244582 | No  | No  | No | No | No | No | Yes | No |
| 55810  | FOXJ2    | forkhead box J2                                                                                                 | 0.00244851 | Yes | No  | No | No | No | No | No  | No |
| 4063   | LY9      | lymphocyte antigen 9                                                                                            | 0.00244863 | Yes | Yes | No | No | No | No | No  | No |
| 4857   | NOVA1    | neuro-oncological ventral antigen 1                                                                             | 0.00244917 | Yes | No  | No | No | No | No | No  | No |
| 2819   | GPD1     | glycerol-3-phosphate dehydrogenase 1 (soluble)                                                                  | 0.00245412 | Yes | No  | No | No | No | No | No  | No |
| 9557   | CHD1L    | chromodomain helicase DNA binding protein 1-like                                                                | 0.0024687  | Yes | No  | No | No | No | No | No  | No |
| 8824   | CES2     | carboxylesterase 2 (intestine, liver)                                                                           | 0.00246884 | Yes | No  | No | No | No | No | No  | No |
| 4867   | NPHP1    | nephronophthisis 1 (juvenile)                                                                                   | 0.00247241 | Yes | No  | No | No | No | No | No  | No |
| 348013 | FAM70B   | family with sequence similarity 70, member B                                                                    | 0.00247772 | NA  | No  | No | No | No | No | Yes | No |
| 146923 | RUNDC1   | RUN domain containing 1                                                                                         | 0.00247952 | Yes | No  | No | No | No | No | No  | No |
| 23625  | FAM89B   | family with sequence similarity 89, member B                                                                    | 0.00248417 | Yes | No  | No | No | No | No | No  | No |
| 51028  | VPS36    | vacuolar protein sorting 36 homolog (S. cerevisiae)                                                             | 0.0024856  | Yes | No  | No | No | No | No | No  | No |
| 23353  | UNC84A   | unc-84 homolog A (C. elegans)                                                                                   | 0.00248655 | Yes | No  | No | No | No | No | No  | No |
| 159    | ADSS     | adenylosuccinate synthase                                                                                       | 0.00248673 | Yes | No  | No | No | No | No | No  | No |
| 5287   | PIK3C2B  | phosphoinositide-3-kinase, class 2, beta polypeptide                                                            | 0.00248717 | Yes | No  | No | No | No | No | No  | No |
| 23236  | PLCB1    | phospholipase C, beta 1 (phosphoinositide-specific)                                                             | 0.00249026 | Yes | No  | No | No | No | No | No  | No |
| 3190   | HNRNPK   | heterogeneous nuclear ribonucleoprotein K                                                                       | 0.00249333 | No  | No  | No | No | No | No | Yes | No |
| 9697   | TRAM2    | translocation associated membrane protein 2                                                                     | 0.00249681 | Yes | No  | No | No | No | No | No  | No |
| 10509  | SEMA4B   | sema domain, immunoglobulin domain (Ig), transmembrane domain (TM) and short cytoplasmic domain (semaphorin) 4B | 0.00250446 | Yes | No  | No | No | No | No | No  | No |
| 84868  | HAVCR2   | hepatitis A virus cellular receptor 2                                                                           | 0.00251256 | Yes | No  | No | No | No | No | No  | No |
| 340351 | AGBL3    | ATP/GTP binding protein-like 3                                                                                  | 0.00251313 | Yes | No  | No | No | No | No | No  | No |
| 9572   | NR1D1    | nuclear receptor subfamily 1, group D, member 1                                                                 | 0.00251841 | Yes | No  | No | No | No | No | No  | No |
| 22869  | ZNF510   | zinc finger protein 510                                                                                         | 0.00255166 | Yes | No  | No | No | No | No | No  | No |
| 162427 | FAM134C  | family with sequence similarity 134, member C                                                                   | 0.00256169 | Yes | No  | No | No | No | No | No  | No |

|        |          |                                                                                                               |            |     |     |    |    |    |     |     |     |
|--------|----------|---------------------------------------------------------------------------------------------------------------|------------|-----|-----|----|----|----|-----|-----|-----|
| 2043   | EPHA4    | EPH receptor A4                                                                                               | 0.00257096 | Yes | No  | No | No | No | No  | No  | No  |
| 51317  | PHF21A   | PHD finger protein 21A                                                                                        | 0.00257179 | Yes | No  | No | No | No | No  | No  | No  |
| 390327 | OR6C70   | olfactory receptor, family 6, subfamily C, member 70                                                          | 0.00257303 | NA* | Yes | No | No | No | No  | No  | No  |
| 197320 | ZNF778   | zinc finger protein 778                                                                                       | 0.00258266 | No  | No  | No | No | No | Yes | No  | No  |
| 51274  | KLF3     | Kruppel-like factor 3 (basic)                                                                                 | 0.00258478 | Yes | No  | No | No | No | No  | No  | No  |
| 9127   | P2RX6    | purinergic receptor P2X, ligand-gated ion channel, 6                                                          | 0.00260204 | Yes | No  | No | No | No | No  | No  | No  |
| 7220   | TRPC1    | transient receptor potential cation channel, subfamily C, member 1                                            | 0.00263888 | Yes | No  | No | No | No | No  | No  | No  |
| 4668   | NAGA     | N-acetylgalactosaminidase, alpha-                                                                             | 0.00263964 | Yes | No  | No | No | No | No  | No  | No  |
| 266722 | HS6ST3   | heparan sulfate 6-O-sulfotransferase 3                                                                        | 0.00264298 | No  | Yes | No | No | No | No  | No  | No  |
| 64168  | NECAB1   | N-terminal EF-hand calcium binding protein 1                                                                  | 0.00266225 | Yes | No  | No | No | No | No  | No  | No  |
| 375790 | AGRN     | agrin                                                                                                         | 0.00266309 | Yes | No  | No | No | No | No  | No  | No  |
| 5208   | PFKFB2   | 6-phosphofructo-2-kinase/fructose-2,6-bisphosphatase 2                                                        | 0.00267579 | Yes | No  | No | No | No | No  | No  | No  |
| 55186  | SLC25A36 | solute carrier family 25, member 36                                                                           | 0.00268059 | No  | No  | No | No | No | Yes | No  | No  |
| 10280  | OPRS1    | opioid receptor, sigma 1                                                                                      | 0.00270324 | Yes | No  | No | No | No | No  | No  | No  |
| 2592   | GALT     | galactose-1-phosphate uridylyltransferase                                                                     | 0.00270324 | Yes | No  | No | No | No | No  | No  | No  |
| 80110  | ZNF614   | zinc finger protein 614                                                                                       | 0.0027035  | Yes | No  | No | No | No | No  | No  | No  |
| 23671  | TMEFF2   | transmembrane protein with EGF-like and two follistatin-like domains 2                                        | 0.00270464 | Yes | No  | No | No | No | No  | No  | No  |
| 7318   | UBA7     | ubiquitin-like modifier activating enzyme 7                                                                   | 0.0027067  | Yes | No  | No | No | No | No  | No  | No  |
| 64432  | MRPS25   | mitochondrial ribosomal protein S25                                                                           | 0.00271248 | Yes | No  | No | No | No | No  | No  | No  |
| 2925   | GRPR     | gastrin-releasing peptide receptor                                                                            | 0.00272049 | No  | No  | No | No | No | Yes | No  | No  |
| 123016 | TTC8     | tetratricopeptide repeat domain 8                                                                             | 0.00272575 | Yes | No  | No | No | No | No  | No  | No  |
| 3712   | IVD      | isovaleryl Coenzyme A dehydrogenase                                                                           | 0.00273534 | Yes | No  | No | No | No | No  | No  | No  |
| 285362 | SUMF1    | sulfatase modifying factor 1                                                                                  | 0.00275798 | Yes | No  | No | No | No | No  | No  | No  |
| 6294   | SAFB     | scaffold attachment factor B                                                                                  | 0.00276077 | No  | Yes | No | No | No | No  | No  | No  |
| 9854   | C2CD2L   | C2CD2-like                                                                                                    | 0.0027665  | Yes | No  | No | No | No | No  | No  | No  |
| 1798   | DPAGT1   | dolichyl-phosphate (UDP-N-acetylglucosamine) N-acetylglucosaminophosphotransferase 1 (GlcNAc-4-P transferase) | 0.0027665  | No  | No  | No | No | No | Yes | No  | No  |
| 27307  | MAG      | malignancy-associated gene                                                                                    | 0.0027684  | NA  | No  | No | No | No | Yes | No  | No  |
| 51621  | KLF13    | Kruppel-like factor 13                                                                                        | 0.00277387 | Yes | No  | No | No | No | No  | No  | No  |
| 2101   | ESRRA    | estrogen-related receptor alpha                                                                               | 0.00278091 | No  | No  | No | No | No | Yes | Yes | Yes |
| 9051   | PSTPIP1  | proline-serine-threonine phosphatase interacting protein 1                                                    | 0.00278486 | Yes | No  | No | No | No | No  | No  | No  |
| 124583 | CANT1    | calcium activated nucleotidase 1                                                                              | 0.00279393 | Yes | No  | No | No | No | No  | No  | No  |
| 51060  | TXNDC12  | thioredoxin domain containing 12 (endoplasmic reticulum)                                                      | 0.00279494 | No  | No  | No | No | No | Yes | No  | No  |
| 7327   | UBE2G2   | ubiquitin-conjugating enzyme E2G 2 (UBC7 homolog, yeast)                                                      | 0.00280683 | Yes | No  | No | No | No | No  | No  | No  |
| 4734   | NEDD4    | neural precursor cell expressed, developmentally down-regulated 4                                             | 0.00281403 | Yes | No  | No | No | No | No  | No  | No  |

|        |          |                                                                                                                              |            |     |     |    |    |    |    |     |    |
|--------|----------|------------------------------------------------------------------------------------------------------------------------------|------------|-----|-----|----|----|----|----|-----|----|
| 22934  | RPIA     | ribose 5-phosphate isomerase A (ribose 5-phosphate epimerase)                                                                | 0.00282096 | No  | No  | No | No | No | No | Yes | No |
| 26108  | PYGO1    | pygopus homolog 1 (Drosophila)                                                                                               | 0.00283321 | Yes | No  | No | No | No | No | No  | No |
| 3752   | KCND3    | potassium voltage-gated channel, Shal-related subfamily, member 3                                                            | 0.00284054 | Yes | No  | No | No | No | No | No  | No |
| 5742   | PTGS1    | prostaglandin-endoperoxide synthase 1 (prostaglandin G/H synthase and cyclooxygenase)                                        | 0.00284534 | Yes | No  | No | No | No | No | No  | No |
| 50810  | HDGFRP3  | hepatoma-derived growth factor, related protein 3                                                                            | 0.00284808 | Yes | No  | No | No | No | No | No  | No |
| 7520   | XRCC5    | X-ray repair complementing defective repair in Chinese hamster cells 5 (double-strand-break rejoining Ku autoantigen, 80kDa) | 0.00286522 | Yes | No  | No | No | No | No | No  | No |
| 64420  | SUSD1    | sushi domain containing 1                                                                                                    | 0.00286774 | Yes | No  | No | No | No | No | No  | No |
| 23597  | ACOT9    | acyl-CoA thioesterase 9                                                                                                      | 0.00288167 | Yes | No  | No | No | No | No | No  | No |
| 50862  | RNF141   | ring finger protein 141                                                                                                      | 0.0029002  | Yes | No  | No | No | No | No | No  | No |
| 130557 | ZNF513   | zinc finger protein 513                                                                                                      | 0.00291552 | No  | Yes | No | No | No | No | No  | No |
| 53616  | ADAM22   | ADAM metallopeptidase domain 22                                                                                              | 0.00291561 | Yes | No  | No | No | No | No | No  | No |
| 4036   | LRP2     | low density lipoprotein-related protein 2                                                                                    | 0.00293254 | Yes | No  | No | No | No | No | No  | No |
| 147947 | ZNF542   | zinc finger protein 542                                                                                                      | 0.002938   | Yes | No  | No | No | No | No | No  | No |
| 55718  | POLR3E   | polymerase (RNA) III (DNA directed) polypeptide E (80kD)                                                                     | 0.00294032 | Yes | No  | No | No | No | No | No  | No |
| 30833  | NT5C     | 5', 3'-nucleotidase, cytosolic                                                                                               | 0.0029423  | Yes | No  | No | No | No | No | No  | No |
| 8395   | PIPK1B   | phosphatidylinositol-4-phosphate 5-kinase, type 1, beta                                                                      | 0.00294254 | Yes | No  | No | No | No | No | No  | No |
| 55841  | WWC3     | WWC family member 3                                                                                                          | 0.00294572 | Yes | No  | No | No | No | No | No  | No |
| 7448   | VTN      | vitronectin                                                                                                                  | 0.00294892 | Yes | No  | No | No | No | No | No  | No |
| 9270   | ITGB1BP1 | integrin beta 1 binding protein 1                                                                                            | 0.00295628 | No  | No  | No | No | No | No | Yes | No |
| 11135  | CDC42EP1 | CDC42 effector protein (Rho GTPase binding) 1                                                                                | 0.00295954 | No  | Yes | No | No | No | No | No  | No |
| 50650  | ARHGEF3  | Rho guanine nucleotide exchange factor (GEF) 3                                                                               | 0.00297415 | Yes | No  | No | No | No | No | No  | No |
| 673    | BRAF     | v-raf murine sarcoma viral oncogene homolog B1                                                                               | 0.00298779 | No  | No  | No | No | No | No | Yes | No |
| 29108  | PYCARD   | PYD and CARD domain containing                                                                                               | 0.00299731 | Yes | No  | No | No | No | No | No  | No |
| 3685   | ITGAV    | integrin, alpha V (vitronectin receptor, alpha polypeptide, antigen CD51)                                                    | 0.00299946 | No  | Yes | No | No | No | No | No  | No |
| 5691   | PSMB3    | proteasome (prosome, macropain) subunit, beta type, 3                                                                        | 0.00300167 | No  | No  | No | No | No | No | Yes | No |
| 284161 | GDPD1    | glycerophosphodiester phosphodiesterase domain containing 1                                                                  | 0.00300289 | Yes | No  | No | No | No | No | No  | No |
| 10772  | FUSIP1   | FUS interacting protein (serine/arginine-rich) 1                                                                             | 0.00300661 | No  | No  | No | No | No | No | Yes | No |
| 23162  | MAPK8IP3 | mitogen-activated protein kinase 8 interacting protein 3                                                                     | 0.00301151 | Yes | No  | No | No | No | No | No  | No |
| 1880   | EBI2     | Epstein-Barr virus induced gene 2 (lymphocyte-specific G protein-coupled receptor)                                           | 0.00302325 | Yes | Yes | No | No | No | No | No  | No |
| 1777   | DNASE2   | deoxyribonuclease II, lysosomal                                                                                              | 0.00302925 | Yes | No  | No | No | No | No | No  | No |
| 9980   | DOPEY2   | dopey family member 2                                                                                                        | 0.00305894 | Yes | No  | No | No | No | No | No  | No |
| 3768   | KCNJ12   | potassium inwardly-rectifying channel, subfamily J, member 12                                                                | 0.00307107 | Yes | No  | No | No | No | No | No  | No |
| 54805  | CNNM2    | cyclin M2                                                                                                                    | 0.00308772 | Yes | No  | No | No | No | No | No  | No |
| 65018  | PINK1    | PTEN induced putative kinase 1                                                                                               | 0.00308909 | Yes | No  | No | No | No | No | No  | No |

|        |          |                                                                               |            |     |     |    |    |    |     |    |    |
|--------|----------|-------------------------------------------------------------------------------|------------|-----|-----|----|----|----|-----|----|----|
| 11031  | RAB31    | RAB31, member RAS oncogene family                                             | 0.00310728 | Yes | Yes | No | No | No | No  | No | No |
| 55831  | TMEM111  | transmembrane protein 111                                                     | 0.00310795 | Yes | No  | No | No | No | No  | No | No |
| 84002  | B3GNT5   | UDP-GlcNAc:betaGal beta-1,3-N-acetylglucosaminyltransferase 5                 | 0.00312167 | Yes | No  | No | No | No | No  | No | No |
| 26585  | GREM1    | gremlin 1, cysteine knot superfamily, homolog (Xenopus laevis)                | 0.00313099 | Yes | No  | No | No | No | No  | No | No |
| 56146  | PCDHA2   | protocadherin alpha 2                                                         | 0.00313921 | Yes | No  | No | No | No | No  | No | No |
| 155038 | GIMAP8   | GTPase, IMAP family member 8                                                  | 0.00314956 | Yes | No  | No | No | No | No  | No | No |
| 401040 | FLJ45964 | hypothetical FLJ45964                                                         | 0.0031846  | NA* | Yes | No | No | No | No  | No | No |
| 51108  | METTL9   | methyltransferase like 9                                                      | 0.00318737 | Yes | No  | No | No | No | No  | No | No |
| 26164  | GTPBP5   | GTP binding protein 5 (putative)                                              | 0.0032074  | Yes | No  | No | No | No | No  | No | No |
| 23029  | RBM34    | RNA binding motif protein 34                                                  | 0.00320926 | No  | No  | No | No | No | Yes | No | No |
| 150864 | ALS2CR13 | amyotrophic lateral sclerosis 2 (juvenile) chromosome region, candidate 13    | 0.00322697 | Yes | No  | No | No | No | No  | No | No |
| 4152   | MBD1     | methyl-CpG binding domain protein 1                                           | 0.00322917 | Yes | No  | No | No | No | No  | No | No |
| 7024   | TFCP2    | transcription factor CP2                                                      | 0.00323328 | Yes | No  | No | No | No | No  | No | No |
| 8569   | MKNK1    | MAP kinase interacting serine/threonine kinase 1                              | 0.0032352  | Yes | Yes | No | No | No | No  | No | No |
| 79370  | BCL2L14  | BCL2-like 14 (apoptosis facilitator)                                          | 0.00325519 | Yes | No  | No | No | No | No  | No | No |
| 54982  | CLN6     | ceroid-lipofuscinosis, neuronal 6, late infantile, variant                    | 0.0032552  | Yes | No  | No | No | No | No  | No | No |
| 56888  | KCMF1    | potassium channel modulatory factor 1                                         | 0.00325564 | Yes | No  | No | No | No | Yes | No | No |
| 2078   | ERG      | eta-erythroblastosis virus E2b oncogene homolog (avian)                       | 0.003257   | Yes | No  | No | No | No | No  | No | No |
| 283989 | TSEN54   | tRNA splicing endonuclease 54 homolog (S. cerevisiae)                         | 0.0032601  | Yes | No  | No | No | No | No  | No | No |
| 23189  | KANK1    | KN motif and ankyrin repeat domains 1                                         | 0.00326026 | No  | Yes | No | No | No | No  | No | No |
| 83643  | CCDC3    | coiled-coil domain containing 3                                               | 0.00326113 | Yes | No  | No | No | No | No  | No | No |
| 6500   | SKP1     | S-phase kinase-associated protein 1                                           | 0.00326698 | Yes | No  | No | No | No | No  | No | No |
| 117608 | ZNF354B  | zinc finger protein 354B                                                      | 0.00327498 | Yes | No  | No | No | No | No  | No | No |
| 84669  | USP32    | ubiquitin specific peptidase 32                                               | 0.00328374 | Yes | No  | No | No | No | Yes | No | No |
| 991    | CDC20    | cell division cycle 20 homolog (S. cerevisiae)                                | 0.00328404 | No  | No  | No | No | No | Yes | No | No |
| 26030  | PLEKHG3  | pleckstrin homology domain containing, family G (with RhoGef domain) member 3 | 0.00328709 | Yes | No  | No | No | No | No  | No | No |
| 10075  | HUWE1    | HECT, UBA and WWE domain containing 1                                         | 0.00329543 | Yes | Yes | No | No | No | No  | No | No |
| 54708  | MARCH5   | membrane-associated ring finger (C3HC4) 5                                     | 0.00330613 | No  | No  | No | No | No | Yes | No | No |
| 56134  | PCDHAC2  | protocadherin alpha subfamily C, 2                                            | 0.00330962 | Yes | No  | No | No | No | No  | No | No |
| 8853   | DDEF2    | development and differentiation enhancing factor 2                            | 0.0033113  | Yes | No  | No | No | No | No  | No | No |
| 254531 | LPCAT4   | lysophosphatidylcholine acyltransferase 4                                     | 0.00332038 | Yes | No  | No | No | No | No  | No | No |
| 23095  | KIF1B    | kinesin family member 1B                                                      | 0.00332798 | Yes | No  | No | No | No | No  | No | No |
| 10870  | HCST     | hematopoietic cell signal transducer                                          | 0.00333648 | No  | No  | No | No | No | Yes | No | No |
| 390433 | OR4K13   | olfactory receptor, family 4, subfamily K, member 13                          | 0.00335388 | NA* | Yes | No | No | No | No  | No | No |



|        |           |                                                                        |            |     |     |    |    |    |     |     |
|--------|-----------|------------------------------------------------------------------------|------------|-----|-----|----|----|----|-----|-----|
| 16981  | SPIN3     | spindlin family, member 3                                              | 0.00336125 | Yes | Yes | No | No | No | No  | No  |
| 27033  | ZBTB32    | zinc finger and BTB domain containing 32                               | 0.00336683 | Yes | No  | No | No | No | No  | No  |
| 3433   | IFIT2     | interferon-induced protein with tetratricopeptide repeats 2            | 0.00337812 | Yes | Yes | No | No | No | No  | No  |
| 51729  | WBP11     | WW domain binding protein 11                                           | 0.00338132 | Yes | Yes | No | No | No | Yes | No  |
| 55885  | LMO3      | LIM domain only 3 (rhombotin-like 2)                                   | 0.0033896  | Yes | No  | No | No | No | No  | No  |
| 51174  | TUBD1     | tubulin, delta 1                                                       | 0.00339663 | Yes | No  | No | No | No | No  | No  |
| 117584 | RFPL      | ring finger and FYVE-like domain containing 1                          | 0.00339669 | Yes | No  | No | No | No | No  | No  |
| 7375   | USP4      | ubiquitin specific peptidase 4 (proto-oncogene)                        | 0.00340737 | Yes | No  | No | No | No | No  | No  |
| 8882   | ZNF259    | zinc finger protein 259                                                | 0.00341146 | No  | No  | No | No | No | Yes | No  |
| 5723   | PSPH      | phosphoserine phosphatase                                              | 0.0034123  | No  | Yes | No | No | No | No  | No  |
| 27163  | NAAA      | N-acylethanolamine acid amidase                                        | 0.00342826 | Yes | No  | No | No | No | No  | No  |
| 55922  | NKRF      | NFKB repressing factor                                                 | 0.00342899 | Yes | No  | No | No | No | No  | No  |
| 5434   | POLR2E    | polymerase (RNA) II (DNA directed) polypeptide E, 25kDa                | 0.00343462 | Yes | No  | No | No | No | No  | No  |
| 3140   | MR1       | major histocompatibility complex, class I-related                      | 0.0034372  | Yes | No  | No | No | No | No  | No  |
| 4520   | MTF1      | metal-regulatory transcription factor 1                                | 0.00343912 | Yes | No  | No | No | No | No  | No  |
| 338440 | TMEM16J   | transmembrane protein 16J                                              | 0.00344259 | Yes | No  | No | No | No | No  | No  |
| 139818 | DOCK11    | dedicator of cytokinesis 11                                            | 0.00345383 | Yes | No  | No | No | No | No  | No  |
| 92935  | MARS2     | methionyl-tRNA synthetase 2, mitochondrial                             | 0.0034595  | No  | No  | No | No | No | Yes | No  |
| 5058   | PAK1      | p21 protein (Cdc42/Rac)-activated kinase 1                             | 0.0034714  | Yes | No  | No | No | No | No  | No  |
| 1136   | CHRNA3    | cholinergic receptor, nicotinic, alpha 3                               | 0.00350211 | Yes | No  | No | No | No | No  | No  |
| 8408   | ULK1      | unc-51-like kinase 1 (C. elegans)                                      | 0.00351267 | Yes | No  | No | No | No | No  | No  |
| 3291   | HSD11B2   | hydroxysteroid (11-beta) dehydrogenase 2                               | 0.0035141  | Yes | No  | No | No | No | No  | No  |
| 154796 | AMOT      | angiomin                                                               | 0.00351573 | No  | No  | No | No | No | Yes | Yes |
| 80148  | PQLC1     | PQ loop repeat containing 1                                            | 0.00354125 | Yes | No  | No | No | No | No  | No  |
| 84911  | ZNF382    | zinc finger protein 382                                                | 0.00355063 | Yes | No  | No | No | No | No  | No  |
| 9990   | SLC12A6   | solute carrier family 12 (potassium/chloride transporters), member 6   | 0.00356341 | Yes | No  | No | No | No | No  | No  |
| 7227   | TRPS1     | trichorhinophalangeal syndrome 1                                       | 0.00356486 | Yes | No  | No | No | No | No  | No  |
| 830    | CAPZA2    | capping protein (actin filament) muscle Z-line, alpha 2                | 0.00357599 | Yes | No  | No | No | No | No  | No  |
| 8698   | S1PR4     | sphingosine-1-phosphate receptor 4                                     | 0.00359314 | Yes | No  | No | No | No | Yes | No  |
| 9635   | CLCA2     | CLCA family member 2, chloride channel regulator                       | 0.00363847 | Yes | No  | No | No | No | No  | No  |
| 23074  | UHRF1BP1L | UHRF1 (ICBP90) binding protein 1-like                                  | 0.00364382 | No  | No  | No | No | No | Yes | No  |
| 338    | APOB      | apolipoprotein B (including Ag(x) antigen)                             | 0.00365265 | No  | Yes | No | No | No | No  | No  |
| 79751  | SLC25A22  | solute carrier family 25 (mitochondrial carrier, glutamate), member 22 | 0.00366457 | Yes | No  | No | No | No | No  | No  |
| 203    | AK1       | adenylate kinase 1                                                     | 0.00366724 | Yes | No  | No | No | No | No  | No  |

|        |           |                                                                                               |            |     |     |    |    |    |     |    |    |
|--------|-----------|-----------------------------------------------------------------------------------------------|------------|-----|-----|----|----|----|-----|----|----|
| 64755  | C16orf58  | chromosome 16 open reading frame 58                                                           | 0.00367192 | Yes | No  | No | No | No | No  | No | No |
| 7295   | TXN       | thioredoxin                                                                                   | 0.00367327 | Yes | Yes | No | No | No | Yes | No | No |
| 5023   | P2RX1     | purinergic receptor P2X, ligand-gated ion channel, 1                                          | 0.00368589 | Yes | No  | No | No | No | No  | No | No |
| 84901  | NFATC2IP  | nuclear factor of activated T-cells, cytoplasmic, calcineurin-dependent 2 interacting protein | 0.00369626 | Yes | No  | No | No | No | No  | No | No |
| 56106  | PCDHGA10  | protocadherin gamma subfamily A, 10                                                           | 0.00370678 | No  | Yes | No | No | No | No  | No | No |
| 11046  | SLC35D2   | solute carrier family 35, member D2                                                           | 0.00370915 | Yes | No  | No | No | No | No  | No | No |
| 56940  | DUSP22    | dual specificity phosphatase 22                                                               | 0.0037183  | Yes | Yes | No | No | No | No  | No | No |
| 7267   | TTC3      | tetratricopeptide repeat domain 3                                                             | 0.0037951  | Yes | No  | No | No | No | No  | No | No |
| 22836  | RHOBTB3   | Rho-related BTB domain containing 3                                                           | 0.00379943 | Yes | No  | No | No | No | No  | No | No |
| 8301   | PICALM    | phosphatidylinositol binding clathrin assembly protein                                        | 0.00380297 | Yes | No  | No | No | No | Yes | No | No |
| 440836 | LOC440836 | similar to MGC52679 protein                                                                   | 0.00380676 | Yes | No  | No | No | No | No  | No | No |
| 53822  | FXYP7     | FXYP domain containing ion transport regulator 7                                              | 0.00381814 | Yes | No  | No | No | No | No  | No | No |
| 56243  | KIAA1217  | KIAA1217                                                                                      | 0.00383651 | Yes | No  | No | No | No | No  | No | No |
| 55316  | RSAD1     | radical S-adenosyl methionine domain containing 1                                             | 0.00384563 | Yes | No  | No | No | No | No  | No | No |
| 9112   | MTA1      | metastasis associated 1                                                                       | 0.00386232 | Yes | No  | No | No | No | No  | No | No |
| 9510   | ADAMTS1   | ADAM metalloproteinase with thrombospondin type 1 motif, 1                                    | 0.00387239 | Yes | No  | No | No | No | No  | No | No |
| 65059  | RAPH1     | Ras association (RalGDS/AF-6) and pleckstrin homology domains 1                               | 0.00388225 | No  | Yes | No | No | No | Yes | No | No |
| 57214  | KIAA1199  | KIAA1199                                                                                      | 0.00389414 | Yes | No  | No | No | No | No  | No | No |
| 22881  | ANKRD6    | ankyrin repeat domain 6                                                                       | 0.00389647 | Yes | No  | No | No | No | No  | No | No |
| 3300   | DNAJB2    | DnaJ (Hsp40) homolog, subfamily B, member 2                                                   | 0.00391967 | No  | No  | No | No | No | Yes | No | No |
| 56894  | AGPAT3    | 1-acylglycerol-3-phosphate O-acyltransferase 3                                                | 0.00392726 | Yes | No  | No | No | No | No  | No | No |
| 10893  | MMP24     | matrix metalloproteinase 24 (membrane-inserted)                                               | 0.00392971 | Yes | No  | No | No | No | No  | No | No |
| 151354 | FAM84A    | family with sequence similarity 84, member A                                                  | 0.00393789 | Yes | No  | No | No | No | No  | No | No |
| 27109  | ATP5S     | ATP synthase, H+ transporting, mitochondrial F0 complex, subunit s (factor B)                 | 0.00399184 | No  | Yes | No | No | No | No  | No | No |
| 23532  | PRAME     | preferentially expressed antigen in melanoma                                                  | 0.00401566 | Yes | No  | No | No | No | No  | No | No |
| 7040   | TGFB1     | transforming growth factor, beta 1                                                            | 0.00402287 | Yes | No  | No | No | No | No  | No | No |
| 91653  | BOC       | Boc homolog (mouse)                                                                           | 0.00402808 | Yes | No  | No | No | No | No  | No | No |
| 256380 | SCML4     | sex comb on midleg-like 4 (Drosophila)                                                        | 0.00404102 | Yes | No  | No | No | No | No  | No | No |
| 51268  | PIPOX     | pipecolic acid oxidase                                                                        | 0.00407131 | Yes | No  | No | No | No | No  | No | No |
| 1855   | DVL1      | dishevelled, dsh homolog 1 (Drosophila)                                                       | 0.00407147 | No  | Yes | No | No | No | No  | No | No |
| 3481   | IGF2      | insulin-like growth factor 2 (somatomedin A)                                                  | 0.00408247 | Yes | No  | No | No | No | No  | No | No |
| 54962  | TIPIN     | TIMELESS interacting protein                                                                  | 0.00408481 | No  | No  | No | No | No | Yes | No | No |
| 79830  | ZMYM1     | zinc finger, MYM-type 1                                                                       | 0.00408676 | No  | No  | No | No | No | Yes | No | No |
| 259282 | FAM44A    | family with sequence similarity 44, member A                                                  | 0.00408776 | Yes | No  | No | No | No | No  | No | No |

|        |          |                                                                                |             |     |     |    |    |    |    |     |    |
|--------|----------|--------------------------------------------------------------------------------|-------------|-----|-----|----|----|----|----|-----|----|
| 163154 | MGC24975 | hypothetical protein MGC24975                                                  | 0.00410849  | Yes | No  | No | No | No | No | No  | No |
| 8453   | CUL2     | cullin 2                                                                       | 0.00412464  | Yes | No  | No | No | No | No | No  | No |
| 83733  | SLC25A18 | solute carrier family 25 (mitochondrial carrier), member 18                    | 0.00411287  | Yes | No  | No | No | No | No | No  | No |
| 84078  | KBTBD7   | kelch repeat and BTB (POZ) domain containing 7                                 | 0.00414498  | Yes | No  | No | No | No | No | No  | No |
| 148281 | SYT6     | synaptotagmin VI                                                               | 0.00415404  | No  | Yes | No | No | No | No | No  | No |
| 26472  | PPP1R14B | protein phosphatase 1, regulatory (inhibitor) subunit 14B                      | 0.00415721  | No  | Yes | No | No | No | No | No  | No |
| 285962 | FLJ40852 | hypothetical LOC285962                                                         | 0.00415961  | No  | No  | No | No | No | No | Yes | No |
| 7077   | TIMP2    | TIMP metalloproteinase inhibitor 2                                             | 0.00418218  | Yes | No  | No | No | No | No | No  | No |
| 124935 | SLC43A2  | solute carrier family 43, member 2                                             | 0.00421222  | Yes | No  | No | No | No | No | No  | No |
| 6541   | SLC7A1   | solute carrier family 7 (cationic amino acid transporter, y+ system), member 1 | 0.00421449  | Yes | No  | No | No | No | No | No  | No |
| 55288  | ECHDC2   | enoyl Coenzyme A hydratase domain containing 2                                 | 0.00422475  | Yes | No  | No | No | No | No | No  | No |
| 64135  | IFIH1    | interferon induced with helicase C domain 1                                    | 0.00423645  | Yes | Yes | No | No | No | No | Yes | No |
| 9951   | HS3ST4   | heparan sulfate (glucosamine) 3-O-sulfotransferase 4                           | 0.00423802  | No  | Yes | No | No | No | No | No  | No |
| 11001  | SLC27A2  | solute carrier family 27 (fatty acid transporter), member 2                    | 0.00423846  | Yes | No  | No | No | No | No | No  | No |
| 4775   | NFATC3   | nuclear factor of activated T-cells, cytoplasmic, calcineurin-dependent 3      | 0.00424174  | Yes | No  | No | No | No | No | No  | No |
| 57212  | KIAA0495 | KIAA0495                                                                       | 0.00424501  | Yes | No  | No | No | No | No | No  | No |
| 2984   | GUCY2C   | guanylate cyclase 2C (heat stable enterotoxin receptor)                        | 0.00425576  | Yes | No  | No | No | No | No | No  | No |
| 6844   | VAMP2    | vesicle-associated membrane protein 2 (synaptobrevin 2)                        | 0.00427094  | Yes | No  | No | No | No | No | No  | No |
| 23179  | RGL1     | ral guanine nucleotide dissociation stimulator-like 1                          | 0.00429269  | No  | No  | No | No | No | No | Yes | No |
| 79166  | LILRP2   | leukocyte immunoglobulin-like receptor pseudogene 2                            | 0.00429515  | Yes | No  | No | No | No | No | No  | No |
| 2037   | EPB41L2  | erythrocyte membrane protein band 4.1-like 2                                   | 0.00430222  | Yes | No  | No | No | No | No | No  | No |
| 22983  | MAST1    | microtubule associated serine/threonine kinase 1                               | 0.00432163  | Yes | No  | No | No | No | No | No  | No |
| 24142  | NAT6     | N-acetyltransferase 6                                                          | 0.00432995  | Yes | No  | No | No | No | No | No  | No |
| 7373   | COL14A1  | collagen, type XIV, alpha 1                                                    | 0.00433627  | Yes | No  | No | No | No | No | No  | No |
| 400931 | FLJ27365 | FLJ27365 protein                                                               | 0.004336218 | Yes | No  | No | No | No | No | No  | No |
| 221416 | C6orf223 | chromosome 6 open reading frame 223                                            | 0.00439085  | No  | Yes | No | No | No | No | No  | No |
| 463    | ZFX3     | zinc finger homeobox 3                                                         | 0.00441128  | Yes | No  | No | No | No | No | No  | No |
| 6747   | SSR3     | signal sequence receptor, gamma (translocon-associated protein gamma)          | 0.00442059  | No  | Yes | No | No | No | No | No  | No |
| 79070  | KDEL1    | KDEL (Lys-Asp-Glu-Leu) containing 1                                            | 0.00443001  | No  | No  | No | No | No | No | Yes | No |
| 3043   | HBB      | hemoglobin, beta                                                               | 0.00443102  | Yes | No  | No | No | No | No | No  | No |
| 65082  | VPS33A   | vacuolar protein sorting 33 homolog A (S. cerevisiae)                          | 0.00443109  | Yes | No  | No | No | No | No | No  | No |
| 84513  | PPAPDC1B | phosphatidic acid phosphatase type 2 domain containing 1B                      | 0.00445576  | Yes | No  | No | No | No | No | No  | No |
| 4851   | NOTCH1   | Notch homolog 1, translocation-associated (Drosophila)                         | 0.00447034  | Yes | No  | No | No | No | No | No  | No |
| 405    | ARNT     | aryl hydrocarbon receptor nuclear translocator                                 | 0.00450691  | Yes | No  | No | No | No | No | No  | No |

|        |          |                                                                                  |            |     |     |    |    |    |     |     |
|--------|----------|----------------------------------------------------------------------------------|------------|-----|-----|----|----|----|-----|-----|
| 259230 | SGMS1    | sphingomyelin synthase 1                                                         | 0.00454253 | No  | No  | No | No | No | Yes | No  |
| 26278  | SACS     | spastic ataxia of Charlevoix-Saguenay (sacsin)                                   | 0.00454355 | Yes | No  | No | No | No | No  | No  |
| 1787   | TRDMT1   | tRNA aspartic acid methyltransferase 1                                           | 0.0045452  | Yes | No  | No | No | No | No  | No  |
| 10062  | NR1H3    | nuclear receptor subfamily 1, group H, member 3                                  | 0.00455409 | No  | No  | No | No | No | Yes | No  |
| 1303   | COL12A1  | collagen, type XII, alpha 1                                                      | 0.00456293 | Yes | No  | No | No | No | No  | No  |
| 56889  | TM9SF3   | transmembrane 9 superfamily member 3                                             | 0.00456566 | Yes | No  | No | No | No | No  | No  |
| 8986   | RPS6KA4  | ribosomal protein S6 kinase, 90kDa, polypeptide 4                                | 0.004569   | Yes | No  | No | No | No | No  | No  |
| 5935   | RBM3     | RNA binding motif (RNP1, RRM) protein 3                                          | 0.00458131 | Yes | No  | No | No | No | No  | No  |
| 1519   | CTSO     | cathepsin O                                                                      | 0.00458209 | Yes | No  | No | No | No | No  | No  |
| 92912  | UBE2Q2   | ubiquitin-conjugating enzyme E2Q family member 2                                 | 0.00458233 | Yes | No  | No | No | No | No  | No  |
| 9855   | FARP2    | FERM, RhoGEF and pleckstrin domain protein 2                                     | 0.00458482 | Yes | No  | No | No | No | No  | No  |
| 3275   | PRMT2    | protein arginine methyltransferase 2                                             | 0.00458672 | Yes | No  | No | No | No | No  | No  |
| 7078   | TIMP3    | TIMP metalloproteinase inhibitor 3 (Sorsby fundus dystrophy, pseudoinflammatory) | 0.00458766 | Yes | No  | No | No | No | No  | No  |
| 26959  | HBP1     | HMG-box transcription factor 1                                                   | 0.0046118  | Yes | Yes | No | No | No | Yes | Yes |
| 83549  | UCK1     | uridine-cytidine kinase 1                                                        | 0.00462896 | No  | Yes | No | No | No | No  | No  |
| 64359  | NXX      | nucleoredoxin                                                                    | 0.00463458 | No  | No  | No | No | No | Yes | No  |
| 10215  | OLIG2    | oligodendrocyte lineage transcription factor 2                                   | 0.00463905 | Yes | No  | No | No | No | No  | No  |
| 4656   | MYOG     | myogenin (myogenic factor 4)                                                     | 0.00464182 | Yes | No  | No | No | No | No  | No  |
| 56957  | OTUD7B   | OTU domain containing 7B                                                         | 0.00464319 | Yes | Yes | No | No | No | No  | No  |
| 7567   | ZNF19    | zinc finger protein 19                                                           | 0.00464743 | No  | Yes | No | No | No | No  | No  |
| 10803  | CCR9     | chemokine (C-C motif) receptor 9                                                 | 0.0046572  | Yes | No  | No | No | No | No  | No  |
| 255082 | CASC2    | cancer susceptibility candidate 2                                                | 0.00472081 | Yes | No  | No | No | No | No  | No  |
| 10291  | SF3A1    | splicing factor 3a, subunit 1, 120kDa                                            | 0.0047339  | Yes | No  | No | No | No | No  | No  |
| 11190  | CEP250   | centrosomal protein 250kDa                                                       | 0.00474956 | Yes | No  | No | No | No | No  | No  |
| 130749 | CPO      | carboxypeptidase O                                                               | 0.00476449 | Yes | No  | No | No | No | No  | No  |
| 9159   | PCSK7    | proprotein convertase subtilisin/kexin type 7                                    | 0.00477623 | Yes | No  | No | No | No | No  | No  |
| 257106 | ARHGAP30 | Rho GTPase activating protein 30                                                 | 0.00478423 | Yes | No  | No | No | No | No  | No  |
| 3075   | CFH      | complement factor H                                                              | 0.00479356 | Yes | No  | No | No | No | No  | No  |
| 57475  | PLEKH1   | pleckstrin homology domain containing, family H (with MyTH4 domain) member 1     | 0.00480518 | Yes | Yes | No | No | No | No  | No  |
| 8715   | NOL4     | nucleolar protein 4                                                              | 0.00480715 | Yes | No  | No | No | No | No  | No  |
| 2192   | FBLN1    | fibulin 1                                                                        | 0.00482422 | Yes | No  | No | No | No | No  | No  |
| 9663   | LPIN2    | lipin 2                                                                          | 0.00484343 | Yes | No  | No | No | No | No  | No  |
| 114824 | PNMA5    | paraneoplastic antigen like 5                                                    | 0.0048705  | NA* | Yes | No | No | No | No  | No  |
| 5371   | PML      | promyelocytic leukemia                                                           | 0.00491023 | Yes | No  | No | No | No | No  | No  |

|        |          |                                                                                |            |     |     |    |    |    |    |     |    |
|--------|----------|--------------------------------------------------------------------------------|------------|-----|-----|----|----|----|----|-----|----|
| 6415   | SEPW1    | selenoprotein W, 1                                                             | 0.00491861 | Yes | No  | No | No | No | No | No  | No |
| 265    | AMELX    | amelogenin (amelogenesis imperfecta 1, X-linked)                               | 0.00494133 | Yes | No  | No | No | No | No | No  | No |
| 55330  | CNO      | cappuccino homolog (mouse)                                                     | 0.00495999 | No  | Yes | No | No | No | No | No  | No |
| 5738   | PTGFRN   | prostaglandin F2 receptor negative regulator                                   | 0.00496963 | Yes | No  | No | No | No | No | No  | No |
| 64080  | RBKS     | ribokinase                                                                     | 0.00497387 | No  | No  | No | No | No | No | Yes | No |
| 25792  | CI21     | CDKN1A interacting zinc finger protein 1                                       | 0.00498864 | Yes | No  | No | No | No | No | No  | No |
| 54585  | LZTFL1   | leucine zipper transcription factor-like 1                                     | 0.004993   | Yes | No  | No | No | No | No | Yes | No |
| 10771  | ZMYND11  | zinc finger, MYND domain containing 11                                         | 0.00499334 | Yes | No  | No | No | No | No | No  | No |
| 222659 | PXT1     | peroxisomal, testis specific 1                                                 | 0.00499863 | Yes | No  | No | No | No | No | No  | No |
| 6876   | TAGLN    | transgelin                                                                     | 0.00500595 | Yes | No  | No | No | No | No | No  | No |
| 5152   | PDE9A    | phosphodiesterase 9A                                                           | 0.00501617 | No  | Yes | No | No | No | No | No  | No |
| 7166   | TPH1     | tryptophan hydroxylase 1 (tryptophan 5-monooxygenase)                          | 0.00502648 | Yes | No  | No | No | No | No | No  | No |
| 85479  | DNAJC5B  | DnaJ (Hsp40) homolog, subfamily C, member 5 beta                               | 0.00502942 | Yes | No  | No | No | No | No | No  | No |
| 10612  | TRIM3    | tripartite motif-containing 3                                                  | 0.00503411 | Yes | No  | No | No | No | No | No  | No |
| 55521  | TRIM36   | tripartite motif-containing 36                                                 | 0.00504026 | Yes | No  | No | No | No | No | No  | No |
| 91373  | UAP1L1   | UDP-N-acetylglucosamine pyrophosphorylase 1-like 1                             | 0.00506314 | Yes | No  | No | No | No | No | No  | No |
| 65988  | ZNF747   | zinc finger protein 747                                                        | 0.00506358 | Yes | No  | No | No | No | No | No  | No |
| 57562  | KIAA1377 | KIAA1377                                                                       | 0.00506977 | Yes | No  | No | No | No | No | No  | No |
| 283673 | TMEM84   | transmembrane protein 84                                                       | 0.00507065 | Yes | No  | No | No | No | No | No  | No |
| 137835 | TMEM71   | transmembrane protein 71                                                       | 0.0050772  | Yes | No  | No | No | No | No | No  | No |
| 401612 | MCART6   | mitochondrial carrier triple repeat 6                                          | 0.00508202 | Yes | No  | No | No | No | No | No  | No |
| 56965  | PARP6    | poly (ADP-ribose) polymerase family, member 6                                  | 0.00508253 | Yes | No  | No | No | No | No | No  | No |
| 55506  | H2AFY2   | H2A histone family, member Y2                                                  | 0.00510416 | Yes | No  | No | No | No | No | No  | No |
| 6096   | RORB     | RAR-related orphan receptor B                                                  | 0.00510451 | Yes | No  | No | No | No | No | No  | No |
| 112574 | SNX18    | sorting nexin 18                                                               | 0.00510454 | Yes | No  | No | No | No | No | No  | No |
| 220042 | C11orf82 | chromosome 11 open reading frame 82                                            | 0.00514809 | No  | No  | No | No | No | No | Yes | No |
| 79085  | SLC25A23 | solute carrier family 25 (mitochondrial carrier, phosphate carrier), member 23 | 0.0051512  | Yes | No  | No | No | No | No | No  | No |
| 92359  | CRB3     | crumbs homolog 3 (Drosophila)                                                  | 0.0051512  | Yes | No  | No | No | No | No | No  | No |
| 57486  | NLN      | neuroligin (metallopeptidase M3 family)                                        | 0.00515896 | Yes | Yes | No | No | No | No | No  | No |
| 54020  | SLC37A1  | solute carrier family 37 (glycerol-3-phosphate transporter), member 1          | 0.00518028 | No  | Yes | No | No | No | No | No  | No |
| 27300  | ZNF544   | zinc finger protein 544                                                        | 0.00519434 | Yes | No  | No | No | No | No | No  | No |
| 90634  | N4BP2L1  | NEDD4 binding protein 2-like 1                                                 | 0.00519759 | Yes | No  | No | No | No | No | No  | No |
| 9056   | SLC7A7   | solute carrier family 7 (cationic amino acid transporter, y+ system), member 7 | 0.00523076 | Yes | No  | No | No | No | No | No  | No |
| 9747   | FAM115A  | family with sequence similarity 115, member A                                  | 0.00525867 | Yes | No  | No | No | No | No | No  | No |

|        |          |                                                                               |            |     |     |    |    |    |    |     |    |
|--------|----------|-------------------------------------------------------------------------------|------------|-----|-----|----|----|----|----|-----|----|
| 80196  | RNF34    | ring finger protein 34                                                        | 0.00525897 | No  | No  | No | No | No | No | Yes | No |
| 79918  | SETD6    | SET domain containing 6                                                       | 0.00526006 | Yes | No  | No | No | No | No | No  | No |
| 57446  | NDRG3    | NDRG family member 3                                                          | 0.00527131 | Yes | No  | No | No | No | No | No  | No |
| 23301  | EHBP1    | EH domain binding protein 1                                                   | 0.00532349 | Yes | No  | No | No | No | No | No  | No |
| 10138  | YAF2     | YY1 associated factor 2                                                       | 0.00533755 | Yes | No  | No | No | No | No | No  | No |
| 55095  | SAMD4B   | sterile alpha motif domain containing 4B                                      | 0.0053466  | Yes | No  | No | No | No | No | No  | No |
| 2710   | GK       | glycerol kinase                                                               | 0.00535967 | No  | No  | No | No | No | No | Yes | No |
| 3053   | SERPIND1 | serpin peptidase inhibitor, clade D (heparin cofactor), member 1              | 0.00537665 | Yes | No  | No | No | No | No | No  | No |
| 55339  | WDR33    | WD repeat domain 33                                                           | 0.00540989 | Yes | No  | No | No | No | No | No  | No |
| 90853  | SPOCD1   | SPOC domain containing 1                                                      | 0.00541551 | No  | Yes | No | No | No | No | No  | No |
| 8531   | CSDA     | cold shock domain protein A                                                   | 0.00541994 | Yes | No  | No | No | No | No | No  | No |
| 10690  | FUT9     | fucosyltransferase 9 (alpha (1,3) fucosyltransferase)                         | 0.00542167 | No  | Yes | No | No | No | No | No  | No |
| 118980 | SFXN2    | sideroflexin 2                                                                | 0.00542564 | No  | No  | No | No | No | No | Yes | No |
| 140628 | GATA5    | GATA binding protein 5                                                        | 0.00542709 | Yes | No  | No | No | No | No | No  | No |
| 83416  | FCRL5    | Fc receptor-like 5                                                            | 0.00543038 | Yes | No  | No | No | No | No | No  | No |
| 3205   | HOXA9    | homeobox A9                                                                   | 0.00544005 | Yes | No  | No | No | No | No | No  | No |
| 1525   | CXADR    | coxsackie virus and adenovirus receptor                                       | 0.00547326 | Yes | No  | No | No | No | No | No  | No |
| 10919  | EHMT2    | euchromatic histone-lysine N-methyltransferase 2                              | 0.00549641 | No  | Yes | No | No | No | No | No  | No |
| 10793  | ZNF273   | zinc finger protein 273                                                       | 0.00551065 | Yes | No  | No | No | No | No | No  | No |
| 22915  | MMRN1    | multimerin 1                                                                  | 0.00551625 | Yes | No  | No | No | No | No | No  | No |
| 58504  | ARHGAP22 | Rho GTPase activating protein 22                                              | 0.00552472 | Yes | No  | No | No | No | No | No  | No |
| 1315   | COPB1    | coatamer protein complex, subunit beta 1                                      | 0.00552809 | Yes | No  | No | No | No | No | No  | No |
| 56650  | CLDN1    | claudin domain containing 1                                                   | 0.00553757 | Yes | No  | No | No | No | No | No  | No |
| 10535  | RNASEH2A | ribonuclease H2, subunit A                                                    | 0.00553946 | No  | No  | No | No | No | No | Yes | No |
| 3155   | HMGCL    | 3-hydroxymethyl-3-methylglutaryl-Coenzyme A lyase (hydroxymethylglutaciduria) | 0.00554579 | No  | No  | No | No | No | No | Yes | No |
| 860    | RUNX2    | runt-related transcription factor 2                                           | 0.00555803 | Yes | No  | No | No | No | No | No  | No |
| 219348 | PLAC9    | placenta-specific 9                                                           | 0.00558606 | Yes | No  | No | No | No | No | No  | No |
| 5997   | RGS2     | regulator of G-protein signaling 2, 24kDa                                     | 0.00558702 | No  | No  | No | No | No | No | Yes | No |
| 51230  | PHF20    | PHD finger protein 20                                                         | 0.00559102 | Yes | Yes | No | No | No | No | No  | No |
| 6248   | RSC1A1   | regulatory solute carrier protein, family 1, member 1                         | 0.00559809 | Yes | No  | No | No | No | No | No  | No |
| 29095  | ORMDL2   | ORM1-like 2 (S. cerevisiae)                                                   | 0.00559831 | No  | No  | No | No | No | No | Yes | No |
| 84324  | CIP29    | cytokine induced protein 29 kDa                                               | 0.00559831 | No  | No  | No | No | No | No | Yes | No |
| 4817   | NIT1     | nitrilase 1                                                                   | 0.0055985  | No  | No  | No | No | No | No | Yes | No |
| 23590  | PDSS1    | prenyl (decaprenyl) diphosphate synthase, subunit 1                           | 0.00560724 | Yes | No  | No | No | No | No | No  | No |

|        |            |                                                                                                                           |            |     |     |    |    |    |    |     |    |
|--------|------------|---------------------------------------------------------------------------------------------------------------------------|------------|-----|-----|----|----|----|----|-----|----|
| 29957  | SLC25A24   | solute carrier family 25 (mitochondrial carrier, phosphate carrier), member 24                                            | 0.00562256 | Yes | No  | No | No | No | No | No  | No |
| 26279  | PLA2G2D    | phospholipase A2, group IID                                                                                               | 0.0056344  | Yes | No  | No | No | No | No | No  | No |
| 10171  | RCL1       | RNA terminal phosphate cyclase-like 1                                                                                     | 0.00565664 | Yes | Yes | No | No | No | No | No  | No |
| 2618   | GART       | phosphoribosylglycinamide formyltransferase, phosphoribosylglycinamide synthetase, phosphoribosylaminimidazole synthetase | 0.00566942 | No  | No  | No | No | No | No | Yes | No |
| 166336 | PRICKLE2   | prickle homolog 2 (Drosophila)                                                                                            | 0.00568734 | Yes | No  | No | No | No | No | No  | No |
| 84895  | FAM73B     | family with sequence similarity 73, member B                                                                              | 0.00570458 | Yes | No  | No | No | No | No | No  | No |
| 9103   | FCGR2C     | Fc fragment of IgG, low affinity IIc, receptor for (CD32)                                                                 | 0.00570844 | Yes | Yes | No | No | No | No | No  | No |
| 64866  | CDCP1      | CUB domain containing protein 1                                                                                           | 0.00572398 | Yes | No  | No | No | No | No | No  | No |
| 260293 | CYP4X1     | cytochrome P450, family 4, subfamily X, polypeptide 1                                                                     | 0.00576871 | Yes | No  | No | No | No | No | No  | No |
| 27005  | USP21      | ubiquitin specific peptidase 21                                                                                           | 0.00578411 | Yes | No  | No | No | No | No | No  | No |
| 6874   | TAF4       | TAF4 RNA polymerase II, TATA box binding protein (TBP)-associated factor, 135kDa                                          | 0.00578527 | Yes | No  | No | No | No | No | Yes | No |
| 54626  | HES2       | hairy and enhancer of split 2 (Drosophila)                                                                                | 0.00578681 | Yes | No  | No | No | No | No | No  | No |
| 1845   | DUSP3      | dual specificity phosphatase 3                                                                                            | 0.00578817 | Yes | No  | No | No | No | No | No  | No |
| 27151  | CPAMD8     | C3 and PZP-like, alpha-2-macroglobulin domain containing 8                                                                | 0.0057922  | Yes | No  | No | No | No | No | No  | No |
| 27141  | CIDEB      | cell death-inducing DFFA-like effector b                                                                                  | 0.00580959 | Yes | No  | No | No | No | No | No  | No |
| 5481   | PPID       | peptidylprolyl isomerase D (cyclophilin D)                                                                                | 0.00583233 | No  | Yes | No | No | No | No | No  | No |
| 30815  | ST6GALNAC6 | ST6 (alpha-N-acetyl-neuraminy-2,3-beta-galactosyl-1,3)-N-acetylgalactosaminide alpha-2,6-sialyltransferase 6              | 0.00583585 | Yes | No  | No | No | No | No | No  | No |
| 81788  | NUAK2      | NUAK family, SNF1-like kinase, 2                                                                                          | 0.00584753 | Yes | No  | No | No | No | No | No  | No |
| 83737  | ITCH       | itchy E3 ubiquitin protein ligase homolog (mouse)                                                                         | 0.0059006  | Yes | Yes | No | No | No | No | No  | No |
| 9340   | GLP2R      | glucagon-like peptide 2 receptor                                                                                          | 0.00590277 | No  | Yes | No | No | No | No | No  | No |
| 167153 | PAPD4      | PAP associated domain containing 4                                                                                        | 0.00590485 | Yes | No  | No | No | No | No | No  | No |
| 6840   | SVIL       | supervillin                                                                                                               | 0.00593791 | Yes | No  | No | No | No | No | No  | No |
| 58533  | SNX6       | sorting nexin 6                                                                                                           | 0.00594809 | Yes | Yes | No | No | No | No | No  | No |
| 169841 | ZNF169     | zinc finger protein 169                                                                                                   | 0.00596489 | Yes | No  | No | No | No | No | No  | No |
| 63892  | THADA      | thyroid adenoma associated                                                                                                | 0.00597836 | Yes | No  | No | No | No | No | No  | No |
| 800    | CALD1      | caldesmon 1                                                                                                               | 0.0060105  | Yes | No  | No | No | No | No | No  | No |
| 10781  | ZNF266     | zinc finger protein 266                                                                                                   | 0.00601442 | Yes | No  | No | No | No | No | No  | No |
| 215    | ABCD1      | ATP-binding cassette, sub-family D (ALD), member 1                                                                        | 0.00601752 | Yes | No  | No | No | No | No | No  | No |
| 10383  | TUBB2C     | tubulin, beta 2C                                                                                                          | 0.00603919 | No  | Yes | No | No | No | No | No  | No |
| 7592   | ZNF41      | zinc finger protein 41                                                                                                    | 0.00605912 | Yes | No  | No | No | No | No | No  | No |
| 1936   | EEF1D      | eukaryotic translation elongation factor 1 delta (guanine nucleotide exchange protein)                                    | 0.0060673  | Yes | No  | No | No | No | No | No  | No |
| 285533 | RNF175     | ring finger protein 175                                                                                                   | 0.00609694 | No  | Yes | No | No | No | No | No  | No |
| 2847   | MCHR1      | melanin-concentrating hormone receptor 1                                                                                  | 0.00611973 | Yes | No  | No | No | No | No | No  | No |
| 23098  | SARM1      | sterile alpha and TIR motif containing 1                                                                                  | 0.0061234  | Yes | No  | No | No | No | No | No  | No |

|        |           |                                                               |            |     |     |    |    |    |     |     |
|--------|-----------|---------------------------------------------------------------|------------|-----|-----|----|----|----|-----|-----|
| 3559   | IL2RA     | interleukin 2 receptor, alpha                                 | 0.00612959 | Yes | No  | No | No | No | No  | No  |
| 89790  | SIGLEC10  | sialic acid binding Ig-like lectin 10                         | 0.00614362 | Yes | No  | No | No | No | No  | No  |
| 55101  | ATP5SL    | ATP5S-like                                                    | 0.00615494 | No  | No  | No | No | No | Yes | No  |
| 56126  | PCDH10    | protocadherin beta 10                                         | 0.00618176 | Yes | No  | No | No | No | No  | No  |
| 10099  | TSPAN3    | tetraspanin 3                                                 | 0.00618805 | Yes | No  | No | No | No | No  | No  |
| 79094  | CHAC1     | Chac, cation transport regulator homolog 1 (E. coli)          | 0.00618953 | No  | Yes | No | No | No | No  | No  |
| 2537   | IFI6      | interferon, alpha-inducible protein 6                         | 0.00620283 | Yes | No  | No | No | No | No  | No  |
| 8019   | BRD3      | bromodomain containing 3                                      | 0.00622689 | Yes | No  | No | No | No | No  | No  |
| 26580  | BSC12     | Bernardinelli-Seip congenital lipodystrophy 2 (seipin)        | 0.00623812 | Yes | No  | No | No | No | Yes | Yes |
| 143188 | LOC143188 | hypothetical LOC143188                                        | 0.00630102 | Yes | No  | No | No | No | No  | No  |
| 81553  | FAM49A    | family with sequence similarity 49, member A                  | 0.00630474 | Yes | No  | No | No | No | Yes | No  |
| 124411 | ZNF720    | zinc finger protein 720                                       | 0.00631752 | Yes | No  | No | No | No | No  | No  |
| 6160   | RPL31     | ribosomal protein L31                                         | 0.00631792 | Yes | No  | No | No | No | No  | No  |
| 55733  | HHAT      | hedgehog acyltransferase                                      | 0.00632178 | Yes | Yes | No | No | No | No  | No  |
| 3993   | LLGL2     | lethal giant larvae homolog 2 (Drosophila)                    | 0.0063259  | Yes | No  | No | No | No | No  | No  |
| 25861  | DFNB31    | deafness, autosomal recessive 31                              | 0.00633614 | Yes | No  | No | No | No | No  | No  |
| 25825  | BACE2     | beta-site APP-cleaving enzyme 2                               | 0.00634696 | No  | Yes | No | No | No | No  | No  |
| 22821  | RASA3     | RAS p21 protein activator 3                                   | 0.0063584  | Yes | No  | No | No | No | No  | No  |
| 127829 | ARL8A     | ADP-ribosylation factor-like 8A                               | 0.00637251 | Yes | No  | No | No | No | No  | No  |
| 9488   | PIGB      | phosphatidylinositol glycan anchor biosynthesis, class B      | 0.00645511 | No  | No  | No | No | No | Yes | No  |
| 65217  | PCDH15    | protocadherin 15                                              | 0.00646011 | Yes | No  | No | No | No | No  | No  |
| 118490 | ZMYND17   | zinc finger, MYND-type containing 17                          | 0.00647684 | No  | Yes | No | No | No | No  | No  |
| 55615  | PRR5      | proline rich 5 (renal)                                        | 0.0064777  | Yes | No  | No | No | No | No  | No  |
| 11346  | SYNPO     | synaptopodin                                                  | 0.00652459 | Yes | No  | No | No | No | No  | No  |
| 119    | ADD2      | adducin 2 (beta)                                              | 0.00653169 | Yes | No  | No | No | No | No  | No  |
| 57333  | RCN3      | reticulocalbin 3, EF-hand calcium binding domain              | 0.00657302 | Yes | No  | No | No | No | No  | No  |
| 23315  | SLC9A8    | solute carrier family 9 (sodium/hydrogen exchanger), member 8 | 0.00658363 | No  | No  | No | No | No | Yes | No  |
| 54897  | CASZ1     | castor zinc finger 1                                          | 0.00659312 | Yes | No  | No | No | No | No  | No  |
| 219287 | FAM123A   | family with sequence similarity 123A                          | 0.00659487 | Yes | No  | No | No | No | No  | No  |
| 10939  | AFG3L2    | AFG3 ATPase family gene 3-like 2 (yeast)                      | 0.00661224 | No  | No  | No | No | No | Yes | No  |
| 5087   | PBX1      | pre-B-cell leukemia homeobox 1                                | 0.00661445 | Yes | No  | No | No | No | No  | No  |
| 9926   | LPGAT1    | lysophosphatidylglycerol acyltransferase 1                    | 0.00661888 | Yes | No  | No | No | No | No  | No  |
| 126669 | SHE       | Src homology 2 domain containing E                            | 0.00662156 | Yes | No  | No | No | No | No  | No  |
| 149175 | MANEAL    | mannosidase, endo-alpha-like                                  | 0.00665912 | Yes | No  | No | No | No | No  | No  |



|        |          |                                                                                                |            |     |     |    |    |    |     |     |     |
|--------|----------|------------------------------------------------------------------------------------------------|------------|-----|-----|----|----|----|-----|-----|-----|
| 9509   | ADAMTS2  | ADAM metalloproteinase with thrombospondin type 1 motif, 2                                     | 0.0066239  | Yes | No  | No | No | No | No  | No  | No  |
| 37     | ACADVL   | acyl-Coenzyme A dehydrogenase, very long chain                                                 | 0.0066443  | No  | No  | No | No | No | Yes | No  | No  |
| 55139  | ANKZF1   | ankyrin repeat and zinc finger domain containing 1                                             | 0.0066699  | Yes | No  | No | No | No | No  | No  | No  |
| 85406  | DNAJC14  | DnaJ (Hsp40) homolog, subfamily C, member 14                                                   | 0.00667487 | No  | Yes | No | No | No | No  | No  | No  |
| 9781   | RNF144A  | ring finger protein 144A                                                                       | 0.00668998 | Yes | No  | No | No | No | No  | No  | No  |
| 2889   | RAPGEF1  | Rap guanine nucleotide exchange factor (GEF) 1                                                 | 0.00669105 | Yes | No  | No | No | No | No  | No  | No  |
| 55593  | OTUD5    | OTU domain containing 5                                                                        | 0.00669299 | No  | Yes | No | No | No | No  | No  | No  |
| 913    | CD1E     | CD1e molecule                                                                                  | 0.00669549 | Yes | No  | No | No | No | No  | No  | No  |
| 224    | ALDH3A2  | aldehyde dehydrogenase 3 family, member A2                                                     | 0.00673094 | Yes | Yes | No | No | No | No  | No  | No  |
| 55897  | MESP1    | mesoderm posterior 1 homolog (mouse)                                                           | 0.00674194 | Yes | No  | No | No | No | No  | No  | No  |
| 79991  | OBFC1    | oligonucleotide/oligosaccharide-binding fold containing 1                                      | 0.00674623 | Yes | No  | No | No | No | No  | No  | No  |
| 28952  | CCDC22   | coiled-coil domain containing 22                                                               | 0.00675206 | Yes | No  | No | No | No | No  | No  | No  |
| 9766   | KIAA0247 | KIAA0247                                                                                       | 0.00676451 | No  | Yes | No | No | No | No  | No  | No  |
| 140606 | SELM     | selenoprotein M                                                                                | 0.00678382 | Yes | No  | No | No | No | No  | No  | No  |
| 147949 | ZNF583   | zinc finger protein 583                                                                        | 0.00680318 | Yes | No  | No | No | No | No  | No  | No  |
| 7552   | ZNF711   | zinc finger protein 711                                                                        | 0.00681899 | Yes | No  | No | No | No | No  | No  | No  |
| 116123 | FMO9P    | flavin containing monooxygenase 9 pseudogene                                                   | 0.00681935 | Yes | No  | No | No | No | No  | No  | No  |
| 7980   | TFPI2    | tissue factor pathway inhibitor 2                                                              | 0.00686671 | Yes | No  | No | No | No | No  | No  | No  |
| 2810   | SFN      | stratifin                                                                                      | 0.00690091 | Yes | No  | No | No | No | No  | No  | No  |
| 136892 | TRIM50   | tripartite motif-containing 50                                                                 | 0.00691216 | No  | Yes | No | No | No | No  | No  | No  |
| 5569   | PKIA     | protein kinase (cAMP-dependent, catalytic) inhibitor alpha                                     | 0.00695546 | No  | No  | No | No | No | Yes | No  | No  |
| 6376   | CX3CL1   | chemokine (C-X3-C motif) ligand 1                                                              | 0.00697995 | Yes | No  | No | No | No | No  | No  | No  |
| 54876  | C4orf30  | chromosome 4 open reading frame 30                                                             | 0.00699612 | No  | No  | No | No | No | Yes | No  | No  |
| 84172  | POLR1B   | polymerase (RNA) I polypeptide B, 128kDa                                                       | 0.00704027 | Yes | No  | No | No | No | No  | No  | No  |
| 29997  | GLTSCR2  | glioma tumor suppressor candidate region gene 2                                                | 0.00704731 | Yes | No  | No | No | No | No  | No  | No  |
| 84282  | RNF135   | ring finger protein 135                                                                        | 0.00707585 | Yes | No  | No | No | No | Yes | No  | No  |
| 51136  | RNFT1    | ring finger protein, transmembrane 1                                                           | 0.00707643 | Yes | No  | No | No | No | No  | No  | No  |
| 101    | ADAM8    | ADAM metalloproteinase domain 8                                                                | 0.00712095 | Yes | No  | No | No | No | No  | No  | No  |
| 11273  | ATXN2L   | ataxin 2-like                                                                                  | 0.00713991 | Yes | No  | No | No | No | No  | No  | No  |
| 55744  | C7orf44  | chromosome 7 open reading frame 44                                                             | 0.00717489 | Yes | No  | No | No | No | No  | No  | No  |
| 55643  | BTBD2    | BTB (POZ) domain containing 2                                                                  | 0.00718216 | Yes | No  | No | No | No | No  | No  | No  |
| 2547   | XRCC6    | X-ray repair complementing defective repair in Chinese hamster cells 6 (Ku autoantigen, 70kDa) | 0.00718672 | Yes | No  | No | No | No | No  | No  | No  |
| 26020  | LRP10    | low density lipoprotein receptor-related protein 10                                            | 0.00718956 | No  | No  | No | No | No | Yes | Yes | Yes |
| 55742  | PARVA    | parvin, alpha                                                                                  | 0.00720181 | Yes | No  | No | No | No | No  | No  | No  |

|        |           |                                                                       |            |     |     |    |    |    |    |     |     |
|--------|-----------|-----------------------------------------------------------------------|------------|-----|-----|----|----|----|----|-----|-----|
| 399474 | TMEM200B  | transmembrane protein 200B                                            | 0.00720723 | Yes | No  | No | No | No | No | No  | No  |
| 140612 | ZFP28     | zinc finger protein 28 homolog (mouse)                                | 0.00721007 | Yes | No  | No | No | No | No | No  | No  |
| 79627  | OGFRL1    | opioid growth factor receptor-like 1                                  | 0.00721074 | No  | Yes | No | No | No | No | No  | No  |
| 56658  | TRIM39    | tripartite motif-containing 39                                        | 0.00722283 | Yes | No  | No | No | No | No | Yes | No  |
| 84619  | ZGPAT     | zinc finger, CCH-type with G patch domain                             | 0.00723118 | Yes | No  | No | No | No | No | No  | No  |
| 3841   | KPNA5     | karyopherin alpha 5 (importin alpha 6)                                | 0.00723212 | Yes | No  | No | No | No | No | No  | No  |
| 134429 | STARD4    | SIAR-related lipid transfer (START) domain containing 4               | 0.00725092 | Yes | No  | No | No | No | No | No  | No  |
| 150094 | SNF1LK    | SNF1-like kinase                                                      | 0.00725116 | Yes | No  | No | No | No | No | Yes | Yes |
| 163087 | ZNF383    | zinc finger protein 383                                               | 0.00725421 | Yes | No  | No | No | No | No | No  | No  |
| 11238  | CA5B      | carbonic anhydrase VB, mitochondrial                                  | 0.00725782 | Yes | No  | No | No | No | No | No  | No  |
| 6745   | SSR1      | signal sequence receptor, alpha (translocon-associated protein alpha) | 0.00732225 | Yes | No  | No | No | No | No | No  | No  |
| 930    | CD19      | CD19 molecule                                                         | 0.00739115 | Yes | No  | No | No | No | No | No  | No  |
| 29775  | CARD10    | caspase recruitment domain family, member 10                          | 0.00741545 | Yes | No  | No | No | No | No | No  | No  |
| 9454   | HOMER3    | homer homolog 3 (Drosophila)                                          | 0.00751509 | Yes | No  | No | No | No | No | No  | No  |
| 2145   | EZH1      | enhancer of zeste homolog 1 (Drosophila)                              | 0.00753401 | Yes | No  | No | No | No | No | No  | No  |
| 9743   | RICS      | Rho GTPase-activating protein                                         | 0.00753671 | Yes | No  | No | No | No | No | No  | No  |
| 3823   | KLRC3     | killer cell lectin-like receptor subfamily C, member 3                | 0.00754191 | Yes | No  | No | No | No | No | No  | No  |
| 55335  | NIPSNAP3B | nipsnap homolog 3B (C. elegans)                                       | 0.00754798 | No  | No  | No | No | No | No | Yes | No  |
| 170850 | KCNG3     | potassium voltage-gated channel, subfamily G, member 3                | 0.00755368 | Yes | No  | No | No | No | No | No  | No  |
| 133015 | C4orf28   | chromosome 4 open reading frame 28                                    | 0.0075646  | Yes | No  | No | No | No | No | No  | No  |
| 8462   | KLF11     | Kruppel-like factor 11                                                | 0.00756865 | Yes | No  | No | No | No | No | No  | No  |
| 7580   | ZNF32     | zinc finger protein 32                                                | 0.00759172 | Yes | No  | No | No | No | No | No  | No  |
| 9254   | CACNA2D2  | calcium channel, voltage-dependent, alpha 2/delta subunit 2           | 0.00760279 | Yes | No  | No | No | No | No | No  | No  |
| 120    | ADD3      | adducin 3 (gamma)                                                     | 0.00762623 | Yes | No  | No | No | No | No | No  | No  |
| 5027   | P2RX7     | purinergic receptor P2X, ligand-gated ion channel, 7                  | 0.0076499  | Yes | No  | No | No | No | No | No  | No  |
| 9263   | STK17A    | serine/threonine kinase 17a                                           | 0.00765805 | Yes | No  | No | No | No | No | No  | No  |
| 80324  | PUS1      | pseudouridylylase synthase 1                                          | 0.00766767 | Yes | No  | No | No | No | No | No  | No  |
| 3680   | ITGA9     | integrin, alpha 9                                                     | 0.00770406 | Yes | No  | No | No | No | No | No  | No  |
| 688    | KLF5      | Kruppel-like factor 5 (intestinal)                                    | 0.00772482 | Yes | No  | No | No | No | No | Yes | No  |
| 23191  | CYFIP1    | cytoplasmic FMR1 interacting protein 1                                | 0.00773115 | Yes | No  | No | No | No | No | No  | No  |
| 6258   | RXRG      | retinoid X receptor, gamma                                            | 0.00773675 | Yes | No  | No | No | No | No | No  | No  |
| 6319   | SCD       | stearoyl-CoA desaturase (delta-9-desaturase)                          | 0.00775145 | Yes | No  | No | No | No | No | No  | No  |
| 139065 | SLITRK4   | SLIT and NTRK-like family, member 4                                   | 0.00775574 | Yes | No  | No | No | No | No | No  | No  |
| 2549   | GAB1      | GRB2-associated binding protein 1                                     | 0.00775619 | Yes | No  | No | No | No | No | No  | No  |

|        |               |                                                                                                             |            |     |     |    |    |    |    |     |    |
|--------|---------------|-------------------------------------------------------------------------------------------------------------|------------|-----|-----|----|----|----|----|-----|----|
| 5564   | PRKAB1        | protein kinase, AMP-activated, beta 1 non-catalytic subunit                                                 | 0.0077802  | No  | No  | No | No | No | No | Yes | No |
| 148268 | ZNF570        | zinc finger protein 570                                                                                     | 0.00778743 | Yes | No  | No | No | No | No | Yes | No |
| 4117   | MAK           | male germ cell-associated kinase                                                                            | 0.007791   | Yes | No  | No | No | No | No | No  | No |
| 11247  | NXPH4         | neurexophilin 4                                                                                             | 0.00779549 | No  | Yes | No | No | No | No | No  | No |
| 9853   | RUSC2         | RUN and SH3 domain containing 2                                                                             | 0.00784053 | Yes | No  | No | No | No | No | No  | No |
| 8742   | TNFSF12       | tumor necrosis factor (ligand) superfamily, member 12                                                       | 0.0078408  | Yes | No  | No | No | No | No | No  | No |
| 3908   | LAMA2         | laminin, alpha 2 (merosin, congenital muscular dystrophy)                                                   | 0.00784501 | Yes | No  | No | No | No | No | No  | No |
| 53346  | TM6SF1        | transmembrane 6 superfamily member 1                                                                        | 0.00784741 | Yes | No  | No | No | No | No | No  | No |
| 356    | FASLG         | Fas ligand (TNF superfamily, member 6)                                                                      | 0.00787191 | No  | Yes | No | No | No | No | No  | No |
| 219855 | SLC37A2       | solute carrier family 37 (glycerol-3-phosphate transporter), member 2                                       | 0.00787364 | No  | No  | No | No | No | No | Yes | No |
| 10763  | NES           | nestin                                                                                                      | 0.00788416 | Yes | No  | No | No | No | No | No  | No |
| 147660 | ZNF578        | zinc finger protein 578                                                                                     | 0.00789255 | Yes | No  | No | No | No | No | No  | No |
| 92106  | OXNAD1        | oxidoreductase NAD-binding domain containing 1                                                              | 0.00791649 | Yes | No  | No | No | No | No | No  | No |
| 84527  | ZNF559        | zinc finger protein 559                                                                                     | 0.00797574 | Yes | No  | No | No | No | No | Yes | No |
| 116113 | FOXP4         | forkhead box P4                                                                                             | 0.00798297 | Yes | No  | No | No | No | No | No  | No |
| 261734 | NPHP4         | nephronophthisis 4                                                                                          | 0.00799129 | No  | No  | No | No | No | No | Yes | No |
| 7568   | ZNF20         | zinc finger protein 20                                                                                      | 0.00799467 | No  | No  | No | No | No | No | Yes | No |
| 8669   | EIF3J         | eukaryotic translation initiation factor 3, subunit J                                                       | 0.00801981 | No  | No  | No | No | No | No | Yes | No |
| 64750  | SMURF2        | SMAD specific E3 ubiquitin protein ligase 2                                                                 | 0.00808481 | Yes | No  | No | No | No | No | No  | No |
| 83594  | NUDT12        | nudix (nucleoside diphosphate linked moiety X)-type motif 12                                                | 0.00809258 | Yes | No  | No | No | No | No | No  | No |
| 2028   | ENPEP         | glutamyl aminopeptidase (aminopeptidase A)                                                                  | 0.00811042 | Yes | No  | No | No | No | No | No  | No |
| 55893  | ZNF395        | zinc finger protein 395                                                                                     | 0.00811342 | Yes | No  | No | No | No | No | No  | No |
| 84173  | RBED1         | RNA binding motif and ELMO/CED-12 domain 1                                                                  | 0.00813361 | Yes | No  | No | No | No | No | Yes | No |
| 84448  | ABLIM2        | actin binding LIM protein family, member 2                                                                  | 0.00814988 | No  | No  | No | No | No | No | Yes | No |
| 64105  | CENPK         | centromere protein K                                                                                        | 0.00815018 | No  | No  | No | No | No | No | Yes | No |
| 55858  | TMEM165       | transmembrane protein 165                                                                                   | 0.00815053 | No  | Yes | No | No | No | No | No  | No |
| 58485  | TRAPPC1       | trafficking protein particle complex 1                                                                      | 0.00816911 | No  | No  | No | No | No | No | Yes | No |
| 84060  | DKFZP564O0523 | hypothetical protein DKFZp564O0523                                                                          | 0.0081774  | Yes | No  | No | No | No | No | No  | No |
| 64087  | MCCC2         | methylcrotonyl-Coenzyme A carboxylase 2 (beta)                                                              | 0.0081782  | Yes | No  | No | No | No | No | No  | No |
| 10625  | IVNS1ABP      | influenza virus NS1A binding protein                                                                        | 0.00817828 | Yes | Yes | No | No | No | No | Yes | No |
| 256435 | ST6GALNAC3    | ST6 (alpha-N-acetylneuraminy-2,3-beta-galactosyl-1,3)-N-acetylgalactosaminide alpha-2,6-sialyltransferase 3 | 0.00824654 | Yes | No  | No | No | No | No | Yes | No |
| 23576  | DDAH1         | dimethylarginine dimethylaminohydrolase 1                                                                   | 0.00826481 | No  | Yes | No | No | No | No | No  | No |
| 23158  | TBC1D9        | TBC1 domain family, member 9 (with GRAM domain)                                                             | 0.00827747 | Yes | Yes | No | No | No | No | No  | No |
| 2634   | GBP2          | guanylate binding protein 2, interferon-inducible                                                           | 0.00828896 | Yes | No  | No | No | No | No | No  | No |

|        |          |                                                                             |            |     |     |    |    |    |     |    |
|--------|----------|-----------------------------------------------------------------------------|------------|-----|-----|----|----|----|-----|----|
| 9208   | LRRFIP1  | leucine rich repeat (in FLJI) interacting protein 1                         | 0.00832613 | Yes | No  | No | No | No | No  | No |
| 55905  | RNF114   | ring finger protein 114                                                     | 0.00833514 | Yes | No  | No | No | No | No  | No |
| 55127  | HEATR1   | HEAT repeat containing 1                                                    | 0.00834587 | Yes | No  | No | No | No | Yes | No |
| 55520  | ELAC1    | elaC homolog 1 (E. coli)                                                    | 0.00836062 | No  | No  | No | No | No | Yes | No |
| 9391   | CIAO1    | cytosolic iron-sulfur protein assembly 1 homolog (S. cerevisiae)            | 0.00836312 | Yes | No  | No | No | No | No  | No |
| 162966 | ZNF600   | zinc finger protein 600                                                     | 0.00838129 | Yes | No  | No | No | No | No  | No |
| 3821   | KLRC1    | killer cell lectin-like receptor subfamily C, member 1                      | 0.00839119 | Yes | No  | No | No | No | No  | No |
| 3551   | IKBKB    | inhibitor of kappa light polypeptide gene enhancer in B-cells, kinase beta  | 0.00841014 | Yes | No  | No | No | No | No  | No |
| 79758  | DHRS12   | dehydrogenase/reductase (SDR family) member 12                              | 0.00842104 | Yes | No  | No | No | No | No  | No |
| 114790 | STK11IP  | serine/threonine kinase 11 interacting protein                              | 0.00846065 | No  | No  | No | No | No | Yes | No |
| 6259   | RYK      | RYK receptor-like tyrosine kinase                                           | 0.00849208 | Yes | Yes | No | No | No | No  | No |
| 79156  | PLEKHF1  | pleckstrin homology domain containing, family F (with FYVE domain) member 1 | 0.00850261 | Yes | No  | No | No | No | No  | No |
| 79701  | FLJ22222 | hypothetical protein FLJ22222                                               | 0.00854759 | Yes | No  | No | No | No | No  | No |
| 2633   | GBP1     | guanylate binding protein 1, interferon-inducible, 67kDa                    | 0.00854847 | Yes | No  | No | No | No | No  | No |
| 4741   | NEFM     | neurofilament, medium polypeptide 150kDa                                    | 0.00855411 | Yes | No  | No | No | No | No  | No |
| 131965 | METTL6   | methyltransferase like 6                                                    | 0.00855902 | Yes | No  | No | No | No | No  | No |
| 113174 | SAAL1    | serum amyloid A-like 1                                                      | 0.00859381 | No  | Yes | No | No | No | No  | No |
| 55625  | ZDHHC7   | zinc finger, DHC-type containing 7                                          | 0.00862484 | No  | No  | No | No | No | Yes | No |
| 6573   | SLC19A1  | solute carrier family 19 (folate transporter), member 1                     | 0.00865577 | Yes | No  | No | No | No | No  | No |
| 5350   | PLN      | phospholamban                                                               | 0.00867008 | Yes | No  | No | No | No | No  | No |
| 8710   | SERPINF7 | serpin peptidase inhibitor, clade B (ovalbumin), member 7                   | 0.00869253 | Yes | No  | No | No | No | No  | No |
| 113510 | HEL308   | DNA helicase HEL308                                                         | 0.00870566 | Yes | No  | No | No | No | Yes | No |
| 3265   | HRAS     | v-Ha-ras Harvey rat sarcoma viral oncogene homolog                          | 0.0087102  | No  | Yes | No | No | No | No  | No |
| 6940   | ZNF354A  | zinc finger protein 354A                                                    | 0.00874609 | Yes | No  | No | No | No | No  | No |
| 3560   | IL2RB    | interleukin 2 receptor, beta                                                | 0.00874623 | Yes | No  | No | No | No | No  | No |
| 57085  | AGTRAP   | angiotensin II receptor-associated protein                                  | 0.00875552 | Yes | No  | No | No | No | No  | No |
| 119395 | FAM26A   | family with sequence similarity 26, member A                                | 0.00876648 | Yes | No  | No | No | No | No  | No |
| 22914  | KLRK1    | killer cell lectin-like receptor subfamily K, member 1                      | 0.00876807 | Yes | No  | No | No | No | No  | No |
| 8728   | ADAM19   | ADAM metalloproteinase domain 19 (meltrin beta)                             | 0.00882474 | Yes | No  | No | No | No | No  | No |
| 55267  | C22orf26 | chromosome 22 open reading frame 26                                         | 0.00885566 | Yes | No  | No | No | No | No  | No |
| 53840  | TRIM34   | tripartite motif-containing 34                                              | 0.00886088 | Yes | No  | No | No | No | No  | No |
| 343990 | C2orf55  | chromosome 2 open reading frame 55                                          | 0.00886797 | Yes | No  | No | No | No | No  | No |
| 79705  | LRRK1    | leucine-rich repeat kinase 1                                                | 0.0088817  | No  | No  | No | No | No | Yes | No |
| 4034   | LRCH4    | leucine-rich repeats and calponin homology (CH) domain containing 4         | 0.00890634 | Yes | No  | No | No | No | No  | No |

|        |          |                                                                                 |            |     |     |    |    |    |     |    |    |
|--------|----------|---------------------------------------------------------------------------------|------------|-----|-----|----|----|----|-----|----|----|
| 271    | AMPD2    | adenosine monophosphate deaminase 2 (isoform L)                                 | 0.0089487  | Yes | No  | No | No | No | No  | No | No |
| 201294 | UNC13D   | unc-13 homolog D (C. elegans)                                                   | 0.00896368 | Yes | No  | No | No | No | No  | No | No |
| 80067  | C2orf37  | chromosome 2 open reading frame 37                                              | 0.00897819 | Yes | No  | No | No | No | No  | No | No |
| 4804   | NGFR     | nerve growth factor receptor (TNFR superfamily, member 16)                      | 0.00900369 | Yes | No  | No | No | No | No  | No | No |
| 7299   | TYR      | tyrosinase (oculocutaneous albinism IA)                                         | 0.00901694 | No  | Yes | No | No | No | No  | No | No |
| 3315   | HSPB1    | heat shock 27kDa protein 1                                                      | 0.00902698 | Yes | No  | No | No | No | No  | No | No |
| 9194   | SLC16A7  | solute carrier family 16, member 7 (monocarboxylic acid transporter 2)          | 0.00903725 | Yes | No  | No | No | No | No  | No | No |
| 22900  | PCNX     | pecanex homolog (Drosophila)                                                    | 0.00910605 | Yes | No  | No | No | No | No  | No | No |
| 9961   | MVP      | major vault protein                                                             | 0.00913882 | Yes | No  | No | No | No | No  | No | No |
| 2626   | GATA4    | GATA binding protein 4                                                          | 0.00917267 | Yes | No  | No | No | No | No  | No | No |
| 5279   | PIGC     | phosphatidylinositol glycan anchor biosynthesis, class C                        | 0.00917672 | Yes | No  | No | No | No | No  | No | No |
| 55337  | C19orf66 | chromosome 19 open reading frame 66                                             | 0.00917772 | Yes | No  | No | No | No | No  | No | No |
| 1612   | DAPK1    | death-associated protein kinase 1                                               | 0.00918675 | Yes | No  | No | No | No | No  | No | No |
| 740    | MRPL49   | mitochondrial ribosomal protein L49                                             | 0.00920426 | No  | No  | No | No | No | Yes | No | No |
| 79744  | ZNF419   | zinc finger protein 419                                                         | 0.00925039 | Yes | No  | No | No | No | No  | No | No |
| 667    | DST      | dystonin                                                                        | 0.00926141 | Yes | No  | No | No | No | No  | No | No |
| 22909  | MTMR15   | myotubularin related protein 15                                                 | 0.00929393 | Yes | No  | No | No | No | No  | No | No |
| 10866  | HCP5     | HLA complex P5                                                                  | 0.00930223 | Yes | No  | No | No | No | No  | No | No |
| 9516   | LITAF    | lipopolysaccharide-induced TNF factor                                           | 0.00930246 | Yes | Yes | No | No | No | No  | No | No |
| 6879   | TAF7     | TAF7 RNA polymerase II, TATA box binding protein (TBP)-associated factor, 55kDa | 0.00931352 | No  | No  | No | No | No | Yes | No | No |
| 5894   | RAF1     | v-raf-1 murine leukemia viral oncogene homolog 1                                | 0.00932393 | Yes | No  | No | No | No | No  | No | No |
| 863    | CBFA2T3  | core-binding factor, runt domain, alpha subunit 2; translocated to, 3           | 0.00933972 | Yes | No  | No | No | No | No  | No | No |
| 54460  | MRPS21   | mitochondrial ribosomal protein S21                                             | 0.00939823 | No  | Yes | No | No | No | No  | No | No |
| 10313  | RTN3     | reticulon 3                                                                     | 0.00943371 | No  | Yes | No | No | No | No  | No | No |
| 23596  | OPN3     | opsin 3                                                                         | 0.00944979 | Yes | Yes | No | No | No | Yes | No | No |
| 4129   | MAOB     | monoamine oxidase B                                                             | 0.00946712 | Yes | No  | No | No | No | No  | No | No |
| 79180  | EFHD2    | EF-hand domain family, member D2                                                | 0.00951341 | Yes | No  | No | No | No | No  | No | No |
| 4035   | LRP1     | low density lipoprotein-related protein 1 (alpha-2-macroglobulin receptor)      | 0.00960303 | Yes | No  | No | No | No | No  | No | No |
| 27335  | EIF3K    | eukaryotic translation initiation factor 3, subunit K                           | 0.00960519 | No  | Yes | No | No | No | No  | No | No |
| 9024   | BRSK2    | BR serine/threonine kinase 2                                                    | 0.00964225 | Yes | No  | No | No | No | No  | No | No |
| 1072   | CFL1     | cofilin 1 (non-muscle)                                                          | 0.00964857 | No  | No  | No | No | No | Yes | No | No |
| 51510  | CHMP5    | chromatin modifying protein 5                                                   | 0.00967073 | No  | No  | No | No | No | Yes | No | No |
| 29950  | SERTAD1  | SERTA domain containing 1                                                       | 0.00968108 | Yes | No  | No | No | No | No  | No | No |
| 90416  | C15orf57 | chromosome 15 open reading frame 57                                             | 0.00969145 | Yes | Yes | No | No | No | No  | No | No |

|        |          |                                                                     |            |     |     |    |    |    |     |     |
|--------|----------|---------------------------------------------------------------------|------------|-----|-----|----|----|----|-----|-----|
| 129852 | FLJ40298 | hypothetical protein FLJ40298                                       | 0.00970881 | Yes | No  | No | No | No | No  | No  |
| 3576   | IL8      | interleukin 8                                                       | 0.00971108 | Yes | No  | No | No | No | No  | No  |
| 84838  | ZNF496   | zinc finger protein 496                                             | 0.00979323 | Yes | No  | No | No | No | No  | No  |
| 10391  | CORO2B   | coronin, actin binding protein, 2B                                  | 0.00981012 | Yes | No  | No | No | No | Yes | No  |
| 23086  | EXPH5    | exophilin 5                                                         | 0.0098246  | Yes | No  | No | No | No | No  | No  |
| 2035   | EPB41    | erythrocyte membrane protein band 4.1 (elliptocytosis 1, RH-linked) | 0.00983885 | Yes | No  | No | No | No | No  | No  |
| 79581  | GPR172A  | G protein-coupled receptor 172A                                     | 0.009864   | Yes | No  | No | No | No | No  | No  |
| 147807 | ZNF524   | zinc finger protein 524                                             | 0.00986429 | No  | Yes | No | No | No | No  | No  |
| 284459 | HKR1     | GLI-Kruppel family member HKR1                                      | 0.00989375 | Yes | No  | No | No | No | No  | No  |
| 10179  | RBM7     | RNA binding motif protein 7                                         | 0.0099338  | No  | No  | No | No | No | Yes | No  |
| 1601   | DAB2     | disabled homolog 2, mitogen-responsive phosphoprotein (Drosophila)  | 0.0099626  | Yes | No  | No | No | No | No  | No  |
| 11333  | PDAP1    | PDGFA associated protein 1                                          | 0.0100035  | No  | No  | No | No | No | Yes | No  |
| 3094   | HINT1    | histidine triad nucleotide binding protein 1                        | 0.0100625  | Yes | No  | No | No | No | No  | No  |
| 3050   | HBZ      | hemoglobin, zeta                                                    | 0.0100644  | Yes | No  | No | No | No | No  | No  |
| 10887  | PROKR1   | prokineticin receptor 1                                             | 0.0100815  | NA  | No  | No | No | No | Yes | No  |
| 284071 | FLJ35848 | hypothetical protein FLJ35848                                       | 0.0101348  | Yes | No  | No | No | No | No  | No  |
| 5339   | PLEC1    | plectin 1, intermediate filament binding protein 500kDa             | 0.0101481  | Yes | No  | No | No | No | No  | No  |
| 7392   | USF2     | upstream transcription factor 2, c-fos interacting                  | 0.0101498  | Yes | No  | No | No | No | No  | No  |
| 10082  | GPC6     | glypican 6                                                          | 0.0102623  | Yes | No  | No | No | No | No  | No  |
| 27232  | GNMT     | glycine N-methyltransferase                                         | 0.0102665  | Yes | No  | No | No | No | No  | No  |
| 147495 | APCDD1   | adenomatosis polyposis coli down-regulated 1                        | 0.0103139  | Yes | No  | No | No | No | No  | No  |
| 10047  | CST8     | cystatin 8 (cystatin-related epididymal specific)                   | 0.0103525  | Yes | No  | No | No | No | No  | No  |
| 115111 | SLC26A7  | solute carrier family 26, member 7                                  | 0.0103569  | Yes | No  | No | No | No | No  | No  |
| 23617  | TSSK2    | testis-specific serine kinase 2                                     | 0.0103684  | Yes | No  | No | No | No | No  | No  |
| 1046   | CDX4     | caudal type homeobox 4                                              | 0.010384   | Yes | No  | No | No | No | No  | No  |
| 3430   | IFI35    | interferon-induced protein 35                                       | 0.0103948  | Yes | Yes | No | No | No | No  | No  |
| 1355   | COX15    | COX15 homolog, cytochrome c oxidase assembly protein (yeast)        | 0.0104881  | No  | No  | No | No | No | Yes | No  |
| 29801  | ZDHHC8   | zinc finger, DHHC-type containing 8                                 | 0.0105061  | Yes | No  | No | No | No | No  | No  |
| 4303   | FOXO4    | forkhead box O4                                                     | 0.0105064  | No  | No  | No | No | No | Yes | Yes |
| 6655   | SOS2     | son of sevenless homolog 2 (Drosophila)                             | 0.0105289  | Yes | No  | No | No | No | No  | No  |
| 286753 | TUSC5    | tumor suppressor candidate 5                                        | 0.0105303  | Yes | No  | No | No | No | No  | No  |
| 23357  | ANGEL1   | angel homolog 1 (Drosophila)                                        | 0.0105593  | Yes | No  | No | No | No | No  | No  |
| 26751  | SH3YL1   | SH3 domain containing, Ysc84-like 1 (S. cerevisiae)                 | 0.0105752  | Yes | No  | No | No | No | Yes | Yes |
| 57572  | DOCK6    | dedicator of cytokinesis 6                                          | 0.0106459  | Yes | No  | No | No | No | No  | No  |

|        |           |                                                                                                   |           |     |     |    |    |    |    |     |    |
|--------|-----------|---------------------------------------------------------------------------------------------------|-----------|-----|-----|----|----|----|----|-----|----|
| 140460 | ASB7      | ankyrin repeat and SOCS box-containing 7                                                          | 0.0106542 | No  | No  | No | No | No | No | Yes | No |
| 64895  | PAPOLG    | poly(A) polymerase gamma                                                                          | 0.0107133 | Yes | No  | No | No | No | No | No  | No |
| 8330   | HIST1H2AK | histone cluster 1, H2ak                                                                           | 0.0107742 | No  | No  | No | No | No | No | Yes | No |
| 4674   | NAP1L2    | nucleosome assembly protein 1-like 2                                                              | 0.010783  | Yes | No  | No | No | No | No | No  | No |
| 404093 | CUEDC1    | CUE domain containing 1                                                                           | 0.0108004 | Yes | No  | No | No | No | No | No  | No |
| 2619   | GAS1      | growth arrest-specific 1                                                                          | 0.0108424 | Yes | No  | No | No | No | No | No  | No |
| 8110   | DPF3      | D4, zinc and double PHD fingers, family 3                                                         | 0.0108479 | Yes | No  | No | No | No | No | No  | No |
| 54996  | MOSC2     | MOCO sulphurase C-terminal domain containing 2                                                    | 0.0109298 | Yes | No  | No | No | No | No | No  | No |
| 9759   | HDAC4     | histone deacetylase 4                                                                             | 0.0109462 | Yes | No  | No | No | No | No | No  | No |
| 7067   | THRA      | thyroid hormone receptor, alpha (erythroblastic leukemia viral (v-erb-a) oncogene homolog, avian) | 0.0109526 | Yes | No  | No | No | No | No | No  | No |
| 7741   | ZNF187    | zinc finger protein 187                                                                           | 0.0109553 | Yes | No  | No | No | No | No | No  | No |
| 414    | ARSD      | arylsulfatase D                                                                                   | 0.0109574 | Yes | No  | No | No | No | No | No  | No |
| 84186  | ZCCHC7    | zinc finger, CCHC domain containing 7                                                             | 0.0109638 | Yes | No  | No | No | No | No | No  | No |
| 373509 | USP50     | ubiquitin specific peptidase 50                                                                   | 0.010992  | Yes | No  | No | No | No | No | No  | No |
| 9341   | VAMP3     | vesicle-associated membrane protein 3 (cellubrevin)                                               | 0.011076  | Yes | No  | No | No | No | No | No  | No |
| 84251  | SGIP1     | SH3-domain GRB2-like (endophilin) interacting protein 1                                           | 0.0111675 | Yes | No  | No | No | No | No | No  | No |
| 373    | TRIM23    | tripartite motif-containing 23                                                                    | 0.0111908 | No  | No  | No | No | No | No | Yes | No |
| 7088   | TLE1      | transducin-like enhancer of split 1 (E(sp1) homolog, Drosophila)                                  | 0.0111918 | Yes | No  | No | No | No | No | No  | No |
| 5205   | ATP8B1    | ATPase, class I, type 8B, member 1                                                                | 0.0112189 | Yes | No  | No | No | No | No | No  | No |
| 162394 | SLFN5     | schlafen family member 5                                                                          | 0.0112556 | Yes | No  | No | No | No | No | No  | No |
| 114880 | OSBPL6    | oxysterol binding protein-like 6                                                                  | 0.0113735 | Yes | No  | No | No | No | No | No  | No |
| 9732   | DOCK4     | dedicator of cytokinesis 4                                                                        | 0.0113793 | Yes | No  | No | No | No | No | Yes | No |
| 90249  | UNC5A     | unc-5 homolog A (C. elegans)                                                                      | 0.0114204 | Yes | No  | No | No | No | No | No  | No |
| 26524  | LATS2     | LATS, large tumor suppressor, homolog 2 (Drosophila)                                              | 0.0114525 | Yes | No  | No | No | No | No | No  | No |
| 3090   | HIC1      | hypermethylated in cancer 1                                                                       | 0.0114545 | Yes | No  | No | No | No | No | No  | No |
| 6811   | STX5      | syntaxin 5                                                                                        | 0.0115123 | No  | No  | No | No | No | No | Yes | No |
| 2651   | GCNT2     | glucosaminyl (N-acetyl) transferase 2, I-branching enzyme (I blood group)                         | 0.0115185 | No  | Yes | No | No | No | No | No  | No |
| 8689   | KRT36     | keratin 36                                                                                        | 0.0115321 | Yes | No  | No | No | No | No | No  | No |
| 3553   | IL1B      | interleukin 1, beta                                                                               | 0.011628  | Yes | No  | No | No | No | No | No  | No |
| 7454   | WAS       | Wiskott-Aldrich syndrome (eczema-thrombocytopenia)                                                | 0.0116605 | Yes | No  | No | No | No | No | No  | No |
| 10488  | CREB3     | cAMP responsive element binding protein 3                                                         | 0.0117461 | No  | No  | No | No | No | No | Yes | No |
| 1359   | CPA3      | carboxypeptidase A3 (mast cell)                                                                   | 0.011783  | Yes | No  | No | No | No | No | No  | No |
| 2768   | GNA12     | guanine nucleotide binding protein (G protein) alpha 12                                           | 0.0117904 | Yes | No  | No | No | No | No | No  | No |
| 6529   | SLC6A1    | solute carrier family 6 (neurotransmitter transporter, GABA), member 1                            | 0.0118353 | Yes | No  | No | No | No | No | No  | No |

|        |         |                                                                                   |           |     |     |    |    |    |     |    |    |
|--------|---------|-----------------------------------------------------------------------------------|-----------|-----|-----|----|----|----|-----|----|----|
| 26052  | DNM3    | dynamins 3                                                                        | 0.0118392 | Yes | No  | No | No | No | No  | No | No |
| 10561  | IFI44   | interferon-induced protein 44                                                     | 0.0118441 | Yes | Yes | No | No | No | No  | No | No |
| 2302   | FOXJ1   | forkhead box J1                                                                   | 0.011851  | Yes | No  | No | No | No | No  | No | No |
| 51162  | EGFL7   | EGF-like-domain, multiple 7                                                       | 0.011865  | Yes | No  | No | No | No | No  | No | No |
| 43     | ACHE    | acetylcholinesterase (Yt blood group)                                             | 0.0119116 | No  | Yes | No | No | No | No  | No | No |
| 5175   | PECAM1  | platelet/endothelial cell adhesion molecule (CD31 antigen)                        | 0.0119119 | Yes | No  | No | No | No | No  | No | No |
| 51063  | FAM26B  | family with sequence similarity 26, member B                                      | 0.0119908 | Yes | No  | No | No | No | No  | No | No |
| 26974  | ZNF285A | zinc finger protein 285A                                                          | 0.0120064 | Yes | No  | No | No | No | No  | No | No |
| 51692  | CPSF3   | cleavage and polyadenylation specific factor 3, 73kDa                             | 0.0121577 | No  | No  | No | No | No | Yes | No | No |
| 145781 | Gcom1   | GRINL1A combined protein                                                          | 0.01219   | Yes | No  | No | No | No | No  | No | No |
| 152877 | FAM53A  | family with sequence similarity 53, member A                                      | 0.0122229 | Yes | No  | No | No | No | No  | No | No |
| 1675   | CFD     | complement factor D (adipsin)                                                     | 0.0122813 | Yes | No  | No | No | No | No  | No | No |
| 573    | BAG1    | BCL2-associated athanogene                                                        | 0.0123106 | Yes | No  | No | No | No | Yes | No | No |
| 256987 | SERINC5 | serine incorporator 5                                                             | 0.0123375 | NA  | No  | No | No | No | Yes | No | No |
| 2055   | CLN8    | ceroid-lipofuscinosis, neuronal 8 (epilepsy, progressive with mental retardation) | 0.012351  | Yes | No  | No | No | No | No  | No | No |
| 84636  | GPR174  | G protein-coupled receptor 174                                                    | 0.0123631 | Yes | No  | No | No | No | No  | No | No |
| 55605  | KIF21A  | kinesin family member 21A                                                         | 0.0124063 | Yes | No  | No | No | No | No  | No | No |
| 57576  | KIF17   | kinesin family member 17                                                          | 0.0124071 | Yes | No  | No | No | No | No  | No | No |
| 6453   | ITSN1   | intersectin 1 (SH3 domain protein)                                                | 0.0124223 | Yes | No  | No | No | No | No  | No | No |
| 1123   | CHN1    | chimerin (chimaerin) 1                                                            | 0.0125143 | No  | No  | No | No | No | Yes | No | No |
| 64333  | ARHGAP9 | Rho GTPase activating protein 9                                                   | 0.0126212 | Yes | No  | No | No | No | No  | No | No |
| 56142  | PCDH6   | protocadherin alpha 6                                                             | 0.012647  | Yes | No  | No | No | No | No  | No | No |
| 5753   | PTK6    | PTK6 protein tyrosine kinase 6                                                    | 0.0126567 | Yes | No  | No | No | No | No  | No | No |
| 387338 | NSUN4   | NOL1/NOP2/Sun domain family, member 4                                             | 0.0127992 | Yes | No  | No | No | No | No  | No | No |
| 257218 | SHPRH   | SNF2 histone linker PHD RING helicase                                             | 0.012836  | Yes | No  | No | No | No | No  | No | No |
| 9253   | NUMBL   | numb homolog (Drosophila)-like                                                    | 0.0128602 | Yes | No  | No | No | No | No  | No | No |
| 165631 | PARP15  | poly (ADP-ribose) polymerase family, member 15                                    | 0.0128894 | Yes | Yes | No | No | No | No  | No | No |
| 23397  | NCAPH   | non-SMC condensin I complex, subunit H                                            | 0.0128944 | No  | No  | No | No | No | Yes | No | No |
| 7738   | ZNF184  | zinc finger protein 184                                                           | 0.0129163 | No  | No  | No | No | No | Yes | No | No |
| 25898  | RCHY1   | ring finger and CHY zinc finger domain containing 1                               | 0.0130429 | Yes | No  | No | No | No | No  | No | No |
| 56287  | GKN1    | gastrokine 1                                                                      | 0.0130584 | Yes | No  | No | No | No | No  | No | No |
| 29883  | CNOT7   | CCR4-NOT transcription complex, subunit 7                                         | 0.0131213 | Yes | No  | No | No | No | No  | No | No |
| 283149 | BCL9L   | B-cell CLL/lymphoma 9-like                                                        | 0.0131703 | Yes | No  | No | No | No | No  | No | No |
| 1827   | RCAN1   | regulator of calcineurin 1                                                        | 0.0131876 | Yes | No  | No | No | No | No  | No | No |



|        |           |                                                                                                                                             |           |     |     |    |    |    |     |    |
|--------|-----------|---------------------------------------------------------------------------------------------------------------------------------------------|-----------|-----|-----|----|----|----|-----|----|
| 7769   | ZNF226    | zinc finger protein 226                                                                                                                     | 0.0132661 | Yes | No  | No | No | No | Yes | No |
| 64098  | PARVG     | parvin, gamma                                                                                                                               | 0.0132679 | Yes | Yes | No | No | No | No  | No |
| 80789  | INTS5     | integrator complex subunit 5                                                                                                                | 0.0132694 | No  | No  | No | No | No | Yes | No |
| 284273 | ZADH2     | zinc binding alcohol dehydrogenase domain containing 2                                                                                      | 0.0132707 | Yes | No  | No | No | No | No  | No |
| 55760  | DHX32     | DEAH (Asp-Glu-Ala-His) box polypeptide 32                                                                                                   | 0.0132719 | Yes | Yes | No | No | No | No  | No |
| 55911  | APOB48R   | apolipoprotein B48 receptor                                                                                                                 | 0.0132968 | Yes | No  | No | No | No | No  | No |
| 49854  | ZNF295    | zinc finger protein 295                                                                                                                     | 0.0133104 | Yes | Yes | No | No | No | No  | No |
| 339451 | KLHL17    | kelch-like 17 (Drosophila)                                                                                                                  | 0.0133898 | Yes | No  | No | No | No | No  | No |
| 80762  | NDFIP1    | Nedd4 family interacting protein 1                                                                                                          | 0.0133999 | Yes | No  | No | No | No | No  | No |
| 4952   | OCRL      | oculocerebrorenal syndrome of Lowe                                                                                                          | 0.0134287 | Yes | No  | No | No | No | No  | No |
| 1999   | ELF3      | E74-like factor 3 (ets domain transcription factor, epithelial-specific)                                                                    | 0.0134474 | Yes | No  | No | No | No | No  | No |
| 50488  | MINK1     | missshapen-like kinase 1 (zebrafish)                                                                                                        | 0.0135154 | Yes | No  | No | No | No | No  | No |
| 81029  | WNT5B     | wingless-type MMTV integration site family, member 5B                                                                                       | 0.0135203 | Yes | No  | No | No | No | No  | No |
| 3690   | ITGB3     | integrin, beta 3 (platelet glycoprotein IIIa, antigen CD61)                                                                                 | 0.0135794 | Yes | No  | No | No | No | No  | No |
| 6203   | RPS9      | ribosomal protein S9                                                                                                                        | 0.0136411 | No  | No  | No | No | No | Yes | No |
| 9037   | SEMA5A    | sema domain, seven thrombospondin repeats (type 1 and type 1-like), transmembrane domain (TM) and short cytoplasmic domain, (semaphorin) 5A | 0.0137063 | Yes | No  | No | No | No | No  | No |
| 54932  | FLJ20433  | hypothetical protein FLJ20433                                                                                                               | 0.0137184 | Yes | No  | No | No | No | No  | No |
| 1911   | PHC1      | polyhomeotic homolog 1 (Drosophila)                                                                                                         | 0.0137551 | Yes | No  | No | No | No | No  | No |
| 9047   | SH2D2A    | SH2 domain protein 2A                                                                                                                       | 0.0138305 | Yes | No  | No | No | No | No  | No |
| 7916   | BAT2      | HLA-B associated transcript 2                                                                                                               | 0.0138343 | No  | No  | No | No | No | Yes | No |
| 3110   | MXN1      | motor neuron and pancreas homeobox 1                                                                                                        | 0.0138346 | No  | Yes | No | No | No | No  | No |
| 170712 | COX7B2    | cytochrome c oxidase subunit VIIb2                                                                                                          | 0.0138933 | Yes | No  | No | No | No | No  | No |
| 3040   | HBA2      | hemoglobin, alpha 2                                                                                                                         | 0.0139573 | Yes | No  | No | No | No | No  | No |
| 140880 | CST11     | cystatin 11                                                                                                                                 | 0.0139618 | Yes | No  | No | No | No | No  | No |
| 7633   | ZNF79     | zinc finger protein 79                                                                                                                      | 0.0139784 | No  | No  | No | No | No | Yes | No |
| 3695   | ITGB7     | integrin, beta 7                                                                                                                            | 0.0139899 | Yes | No  | No | No | No | No  | No |
| 10602  | CDC42EP3  | CDC42 effector protein (Rho GTPase binding) 3                                                                                               | 0.0140659 | Yes | Yes | No | No | No | No  | No |
| 25822  | DNAJB5    | DnaJ (Hsp40) homolog, subfamily B, member 5                                                                                                 | 0.0140659 | No  | No  | No | No | No | Yes | No |
| 55591  | VEZT      | vezatin, adherens junctions transmembrane protein                                                                                           | 0.0140781 | No  | Yes | No | No | No | No  | No |
| 27131  | SNX5      | sorting nexin 5                                                                                                                             | 0.0141265 | No  | No  | No | No | No | Yes | No |
| 3852   | KRT5      | keratin 5 (epidermolysis bullosa simplex, Dowling-Meara/Kobner/Weber-Cockayne types)                                                        | 0.0141409 | Yes | No  | No | No | No | No  | No |
| 606495 | LOC606495 | hypothetical protein LOC606495                                                                                                              | 0.0141761 | Yes | No  | No | No | No | No  | No |
| 83592  | AKR1CL2   | aldo-keto reductase family 1, member C-like 2                                                                                               | 0.0141815 | Yes | No  | No | No | No | No  | No |
| 3182   | HNRNPAB   | heterogeneous nuclear ribonucleoprotein A/B                                                                                                 | 0.0142875 | No  | No  | No | No | No | Yes | No |

|        |          |                                                                                   |           |     |     |    |    |    |     |    |
|--------|----------|-----------------------------------------------------------------------------------|-----------|-----|-----|----|----|----|-----|----|
| 9378   | NRXN1    | neurexin 1                                                                        | 0.0142921 | Yes | No  | No | No | No | No  | No |
| 10172  | ZNF256   | zinc finger protein 256                                                           | 0.0143514 | Yes | No  | No | No | No | No  | No |
| 26037  | SIPA1L1  | signal-induced proliferation-associated 1 like 1                                  | 0.0143576 | Yes | No  | No | No | No | No  | No |
| 5724   | PTAFR    | platelet-activating factor receptor                                               | 0.0144027 | No  | No  | No | No | No | Yes | No |
| 163081 | ZNF567   | zinc finger protein 567                                                           | 0.0144068 | Yes | No  | No | No | No | No  | No |
| 171024 | SYNPO2   | synaptopodin 2                                                                    | 0.0144673 | Yes | No  | No | No | No | No  | No |
| 6236   | RRAD     | Ras-related associated with diabetes                                              | 0.0145038 | Yes | No  | No | No | No | No  | No |
| 91107  | TRIM47   | tripartite motif-containing 47                                                    | 0.0145082 | Yes | No  | No | No | No | No  | No |
| 2355   | FOSL2    | FOS-like antigen 2                                                                | 0.0145212 | Yes | No  | No | No | No | No  | No |
| 5243   | ABCB1    | ATP-binding cassette, sub-family B (MDR/TAP), member 1                            | 0.0145955 | Yes | No  | No | No | No | No  | No |
| 113691 | MGC16703 | tubulin, alpha pseudogene                                                         | 0.0146145 | Yes | No  | No | No | No | No  | No |
| 25802  | LMOD1    | leiomodin 1 (smooth muscle)                                                       | 0.0146414 | Yes | No  | No | No | No | No  | No |
| 26084  | SGEF     | Src homology 3 domain-containing guanine nucleotide exchange factor               | 0.0146583 | Yes | No  | No | No | No | No  | No |
| 147741 | ZNF560   | zinc finger protein 560                                                           | 0.0149022 | Yes | No  | No | No | No | No  | No |
| 3912   | LAMB1    | laminin, beta 1                                                                   | 0.0150027 | Yes | No  | No | No | No | No  | No |
| 1982   | EIF4G2   | eukaryotic translation initiation factor 4 gamma, 2                               | 0.0150655 | No  | Yes | No | No | No | Yes | No |
| 7626   | ZNF75D   | zinc finger protein 75D                                                           | 0.0150659 | Yes | No  | No | No | No | No  | No |
| 1266   | CNN3     | calponin 3, acidic                                                                | 0.0151989 | Yes | No  | No | No | No | No  | No |
| 23259  | DDHD2    | DDHD domain containing 2                                                          | 0.0152255 | Yes | No  | No | No | No | No  | No |
| 2891   | GRIA2    | glutamate receptor, ionotropic, AMPA 2                                            | 0.0152984 | Yes | No  | No | No | No | No  | No |
| 60625  | DHX35    | DEAH (Asp-Glu-Ala-His) box polypeptide 35                                         | 0.0153232 | No  | Yes | No | No | No | No  | No |
| 1040   | CDS1     | CDP-diacylglycerol synthase (phosphatidate cytidylyltransferase) 1                | 0.0154052 | Yes | No  | No | No | No | No  | No |
| 2687   | GGT5     | gamma-glutamyltransferase 5                                                       | 0.0154722 | Yes | No  | No | No | No | No  | No |
| 131566 | DCBLD2   | discoidin, CUB and LCCL domain containing 2                                       | 0.0155446 | Yes | No  | No | No | No | No  | No |
| 22931  | RAB18    | RAB18, member RAS oncogene family                                                 | 0.0156105 | Yes | No  | No | No | No | No  | No |
| 84651  | SPINK7   | serine peptidase inhibitor, Kazal type 7 (putative)                               | 0.0156558 | Yes | No  | No | No | No | No  | No |
| 84255  | SLC37A3  | solute carrier family 37 (glycerol-3-phosphate transporter), member 3             | 0.0157534 | Yes | No  | No | No | No | No  | No |
| 9825   | SPATA2   | spermatogenesis associated 2                                                      | 0.0157636 | No  | Yes | No | No | No | No  | No |
| 5565   | PRKAB2   | protein kinase, AMP-activated, beta 2 non-catalytic subunit                       | 0.0158013 | Yes | No  | No | No | No | No  | No |
| 57801  | HES4     | hairy and enhancer of split 4 (Drosophila)                                        | 0.0158166 | Yes | No  | No | No | No | No  | No |
| 27076  | LYPD3    | LY6/PLAUR domain containing 3                                                     | 0.0158368 | Yes | No  | No | No | No | No  | No |
| 834    | CASP1    | caspase 1, apoptosis-related cysteine peptidase (interleukin 1, beta, convertase) | 0.0158743 | Yes | No  | No | No | No | No  | No |
| 79815  | NPAL2    | NIPA-like domain containing 2                                                     | 0.0158959 | Yes | Yes | No | No | No | No  | No |
| 23221  | RHOBTB2  | Rho-related BTB domain containing 2                                               | 0.0159972 | Yes | No  | No | No | No | No  | No |

|        |           |                                                                                        |           |     |     |    |    |    |     |    |
|--------|-----------|----------------------------------------------------------------------------------------|-----------|-----|-----|----|----|----|-----|----|
| 10371  | SEMA3A    | sema domain, immunoglobulin domain (Ig), short basic domain, secreted, (semaphorin) 3A | 0.0160039 | Yes | No  | No | No | No | No  | No |
| 56950  | SMYD2     | SET and MYND domain containing 2                                                       | 0.0160161 | Yes | No  | No | No | No | No  | No |
| 3340   | NDST1     | N-deacetylase/N-sulfotransferase (heparan glucosaminyl) 1                              | 0.0160298 | Yes | No  | No | No | No | No  | No |
| 201798 | TIGD4     | tigger transposable element derived 4                                                  | 0.016039  | Yes | No  | No | No | No | No  | No |
| 7030   | TFE3      | transcription factor binding to IGHM enhancer 3                                        | 0.0160411 | Yes | No  | No | No | No | No  | No |
| 55727  | BTBD7     | BTB (POZ) domain containing 7                                                          | 0.0160616 | Yes | No  | No | No | No | Yes | No |
| 4707   | NDUFB1    | NADH dehydrogenase (ubiquinone) 1 beta subcomplex, 1, 7kDa                             | 0.0160703 | No  | No  | No | No | No | Yes | No |
| 2047   | EPHB1     | EPH receptor B1                                                                        | 0.0160845 | Yes | No  | No | No | No | No  | No |
| 168433 | RNF133    | ring finger protein 133                                                                | 0.0161571 | Yes | No  | No | No | No | No  | No |
| 8614   | STC2      | stanniocalcin 2                                                                        | 0.0162422 | Yes | No  | No | No | No | No  | No |
| 4637   | MYL6      | myosin, light chain 6, alkali, smooth muscle and non-muscle                            | 0.0162484 | No  | No  | No | No | No | Yes | No |
| 3098   | HK1       | hexokinase 1                                                                           | 0.0163077 | Yes | No  | No | No | No | No  | No |
| 24138  | IFIT5     | interferon-induced protein with tetratricopeptide repeats 5                            | 0.0163094 | Yes | Yes | No | No | No | No  | No |
| 9240   | PNMA1     | paraneoplastic antigen MA1                                                             | 0.0164531 | Yes | No  | No | No | No | No  | No |
| 6504   | SLAMF1    | signaling lymphocytic activation molecule family member 1                              | 0.0165492 | Yes | No  | No | No | No | No  | No |
| 283234 | CCDC88B   | coiled-coil domain containing 88B                                                      | 0.0165583 | Yes | No  | No | No | No | No  | No |
| 10123  | ARL4C     | ADP-ribosylation factor-like 4C                                                        | 0.0166539 | Yes | No  | No | No | No | No  | No |
| 4544   | MTNR1B    | melatonin receptor 1B                                                                  | 0.0167119 | Yes | No  | No | No | No | No  | No |
| 128    | ADH5      | alcohol dehydrogenase 5 (class III), chi polypeptide                                   | 0.016735  | No  | No  | No | No | No | Yes | No |
| 51341  | ZBTB7A    | zinc finger and BTB domain containing 7A                                               | 0.0167522 | Yes | No  | No | No | No | No  | No |
| 4013   | LOH11CR2A | loss of heterozygosity, 11, chromosomal region 2, gene A                               | 0.0167666 | Yes | No  | No | No | No | No  | No |
| 54855  | FAM46C    | family with sequence similarity 46, member C                                           | 0.0167672 | Yes | No  | No | No | No | No  | No |
| 308    | ANXA5     | annexin A5                                                                             | 0.0167946 | No  | No  | No | No | No | Yes | No |
| 8674   | VAMP4     | vesicle-associated membrane protein 4                                                  | 0.0168072 | Yes | No  | No | No | No | No  | No |
| 57798  | GATAD1    | GATA zinc finger domain containing 1                                                   | 0.0168738 | Yes | No  | No | No | No | No  | No |
| 7041   | TGFB11    | transforming growth factor beta 1 induced transcript 1                                 | 0.016883  | Yes | No  | No | No | No | No  | No |
| 140609 | NEK7      | NIMA (never in mitosis gene a)-related kinase 7                                        | 0.0168935 | Yes | No  | No | No | No | No  | No |
| 338872 | C1QTNF9   | C1q and tumor necrosis factor related protein 9                                        | 0.0169016 | Yes | No  | No | No | No | No  | No |
| 1490   | CTGF      | connective tissue growth factor                                                        | 0.016903  | Yes | No  | No | No | No | No  | No |
| 57645  | POGK      | pogo transposable element with KRAB domain                                             | 0.0169194 | Yes | No  | No | No | No | No  | No |
| 115362 | GBP5      | guanylate binding protein 5                                                            | 0.016979  | Yes | No  | No | No | No | No  | No |
| 84958  | SYTL1     | synaptotagmin-like 1                                                                   | 0.0171081 | Yes | No  | No | No | No | No  | No |
| 51130  | ASB3      | ankyrin repeat and SOCS box-containing 3                                               | 0.0171125 | No  | No  | No | No | No | Yes | No |
| 158586 | ZXDB      | zinc finger, X-linked, duplicated B                                                    | 0.0171284 | Yes | No  | No | No | No | No  | No |

|        |          |                                                                                           |           |     |     |    |    |    |     |    |    |
|--------|----------|-------------------------------------------------------------------------------------------|-----------|-----|-----|----|----|----|-----|----|----|
| 831    | CAST     | calpastatin                                                                               | 0.017145  | Yes | No  | No | No | No | No  | No | No |
| 55089  | SLC38A4  | solute carrier family 38, member 4                                                        | 0.0171826 | Yes | No  | No | No | No | No  | No | No |
| 54659  | UGT1A3   | UDP glucuronosyltransferase 1 family, polypeptide A3                                      | 0.0172149 | Yes | No  | No | No | No | No  | No | No |
| 91147  | TMEM67   | transmembrane protein 67                                                                  | 0.0172164 | Yes | No  | No | No | No | No  | No | No |
| 25923  | ATL3     | atlastin 3                                                                                | 0.0172306 | Yes | No  | No | No | No | No  | No | No |
| 23547  | LILRA4   | leukocyte immunoglobulin-like receptor, subfamily A (with TM domain), member 4            | 0.017295  | Yes | No  | No | No | No | No  | No | No |
| 9725   | TMEM63A  | transmembrane protein 63A                                                                 | 0.0174226 | Yes | No  | No | No | No | No  | No | No |
| 10499  | NCOA2    | nuclear receptor coactivator 2                                                            | 0.0175201 | Yes | No  | No | No | No | No  | No | No |
| 51733  | UPB1     | ureidopropionase, beta                                                                    | 0.0176355 | Yes | No  | No | No | No | No  | No | No |
| 55072  | RNF31    | ring finger protein 31                                                                    | 0.017646  | Yes | No  | No | No | No | No  | No | No |
| 55153  | SDAD1    | SDA1 domain containing 1                                                                  | 0.017684  | Yes | No  | No | No | No | No  | No | No |
| 54766  | BTG4     | B-cell translocation gene 4                                                               | 0.0178399 | Yes | No  | No | No | No | No  | No | No |
| 348807 | CDC37    | coiled-coil domain containing 37                                                          | 0.0179525 | Yes | No  | No | No | No | No  | No | No |
| 79841  | AGBL2    | ATP/GTP binding protein-like 2                                                            | 0.0179686 | Yes | No  | No | No | No | No  | No | No |
| 79066  | METT10D  | methyltransferase 10 domain containing                                                    | 0.0180098 | Yes | Yes | No | No | No | No  | No | No |
| 30818  | KCNIP3   | Kv channel interacting protein 3, calsennin                                               | 0.0180418 | Yes | No  | No | No | No | No  | No | No |
| 847    | CAT      | catalase                                                                                  | 0.0180838 | Yes | No  | No | No | No | No  | No | No |
| 5698   | PSMB9    | proteasome (prosome, macropain) subunit, beta type, 9 (large multifunctional peptidase 2) | 0.0180926 | No  | No  | No | No | No | Yes | No | No |
| 162282 | ANKFN1   | ankyrin-repeat and fibronectin type III domain containing 1                               | 0.0182194 | Yes | No  | No | No | No | No  | No | No |
| 51348  | KLRF1    | killer cell lectin-like receptor subfamily F, member 1                                    | 0.018355  | Yes | No  | No | No | No | No  | No | No |
| 3738   | KCNA3    | potassium voltage-gated channel, shaker-related subfamily, member 3                       | 0.0183622 | Yes | No  | No | No | No | No  | No | No |
| 151636 | DTX3L    | deltex 3-like (Drosophila)                                                                | 0.0183653 | Yes | Yes | No | No | No | No  | No | No |
| 132141 | IQCF1    | IQ motif containing F1                                                                    | 0.0184784 | Yes | No  | No | No | No | No  | No | No |
| 3270   | HRC      | histidine rich calcium binding protein                                                    | 0.0185575 | Yes | No  | No | No | No | No  | No | No |
| 9780   | FAM38A   | family with sequence similarity 38, member A                                              | 0.0187273 | Yes | No  | No | No | No | No  | No | No |
| 79828  | METTL8   | methyltransferase like 8                                                                  | 0.0187833 | Yes | Yes | No | No | No | No  | No | No |
| 51264  | MRPL27   | mitochondrial ribosomal protein L27                                                       | 0.0188488 | No  | No  | No | No | No | Yes | No | No |
| 55692  | LUC7L    | LUC7-like (S. cerevisiae)                                                                 | 0.0189089 | Yes | No  | No | No | No | No  | No | No |
| 78988  | MRP63    | mitochondrial ribosomal protein 63                                                        | 0.0191007 | No  | No  | No | No | No | Yes | No | No |
| 2215   | FCGR3B   | Fc fragment of IgG, low affinity IIb, receptor (CD16b)                                    | 0.0191008 | No  | Yes | No | No | No | No  | No | No |
| 55243  | KIRREL   | kin of IRRE like (Drosophila)                                                             | 0.0191401 | Yes | No  | No | No | No | No  | No | No |
| 85457  | KIAA1737 | KIAA1737                                                                                  | 0.0191754 | Yes | No  | No | No | No | No  | No | No |
| 23378  | KIAA0409 | KIAA0409                                                                                  | 0.0192332 | Yes | No  | No | No | No | Yes | No | No |
| 55734  | ZFP64    | zinc finger protein 64 homolog (mouse)                                                    | 0.0192389 | Yes | No  | No | No | No | No  | No | No |

|        |          |                                                                                                                                       |           |     |     |    |    |    |     |     |     |
|--------|----------|---------------------------------------------------------------------------------------------------------------------------------------|-----------|-----|-----|----|----|----|-----|-----|-----|
| 6187   | RPS2     | ribosomal protein S2                                                                                                                  | 0.0192634 | Yes | No  | No | No | No | No  | No  | No  |
| 11137  | PWP1     | PWP1 homolog (S. cerevisiae)                                                                                                          | 0.019372  | No  | No  | No | No | No | Yes | No  | No  |
| 51170  | HSD17B11 | hydroxysteroid (17-beta) dehydrogenase 11                                                                                             | 0.0194014 | Yes | No  | No | No | No | No  | No  | No  |
| 353189 | SLCO4C1  | solute carrier organic anion transporter family, member 4C1                                                                           | 0.0194331 | Yes | Yes | No | No | No | No  | No  | No  |
| 4323   | MMP14    | matrix metalloproteinase 14 (membrane-inserted)                                                                                       | 0.0194711 | Yes | No  | No | No | No | No  | No  | No  |
| 9136   | RRP9     | ribosomal RNA processing 9, small subunit (SSU) processome component, homolog (yeast)                                                 | 0.019472  | Yes | No  | No | No | No | No  | No  | No  |
| 18     | ABAT     | 4-aminobutyrate aminotransferase                                                                                                      | 0.0195136 | Yes | Yes | No | No | No | Yes | Yes | Yes |
| 2315   | MLANA    | melan-A                                                                                                                               | 0.0197031 | Yes | No  | No | No | No | No  | No  | No  |
| 389    | RHOC     | ras homolog gene family, member C                                                                                                     | 0.0197126 | Yes | No  | No | No | No | No  | No  | No  |
| 26022  | TMEM98   | transmembrane protein 98                                                                                                              | 0.0197383 | Yes | No  | No | No | No | No  | No  | No  |
| 340547 | VSIG1    | V-set and immunoglobulin domain containing 1                                                                                          | 0.0197416 | Yes | No  | No | No | No | No  | No  | No  |
| 64094  | SMOC2    | SPARC related modular calcium binding 2                                                                                               | 0.0197482 | Yes | No  | No | No | No | No  | No  | No  |
| 27030  | MLH3     | mutL homolog 3 (E. coli)                                                                                                              | 0.0198227 | Yes | No  | No | No | No | No  | No  | No  |
| 3174   | HNF4G    | hepatocyte nuclear factor 4, gamma                                                                                                    | 0.0198588 | Yes | No  | No | No | No | No  | No  | No  |
| 7469   | WHSC2    | Wolf-Hirschhorn syndrome candidate 2                                                                                                  | 0.0198713 | Yes | No  | No | No | No | No  | No  | No  |
| 5584   | PRKCI    | protein kinase C, iota                                                                                                                | 0.0198859 | No  | Yes | No | No | No | No  | No  | No  |
| 3903   | LAIR1    | leukocyte-associated immunoglobulin-like receptor 1                                                                                   | 0.019915  | Yes | No  | No | No | No | No  | No  | No  |
| 57822  | GRHL3    | grainyhead-like 3 (Drosophila)                                                                                                        | 0.0199352 | Yes | No  | No | No | No | No  | No  | No  |
| 54549  | SDK2     | sidekick homolog 2 (chicken)                                                                                                          | 0.0199458 | Yes | No  | No | No | No | No  | No  | No  |
| 5272   | SERPINB9 | serpin peptidase inhibitor, clade B (ovalbumin), member 9                                                                             | 0.0199564 | Yes | No  | No | No | No | No  | No  | No  |
| 55343  | SLC35C1  | solute carrier family 35, member C1                                                                                                   | 0.0199639 | Yes | No  | No | No | No | No  | No  | No  |
| 27106  | ARRDC2   | arrestin domain containing 2                                                                                                          | 0.0202532 | Yes | No  | No | No | No | No  | No  | No  |
| 80055  | PGAP1    | post-GPI attachment to proteins 1                                                                                                     | 0.0204162 | Yes | No  | No | No | No | Yes | No  | No  |
| 5197   | PF4V1    | platelet factor 4 variant 1                                                                                                           | 0.0204377 | Yes | No  | No | No | No | No  | No  | No  |
| 54980  | C2orf42  | chromosome 2 open reading frame 42                                                                                                    | 0.0204472 | No  | No  | No | No | No | Yes | No  | No  |
| 7205   | TRIP6    | thyroid hormone receptor interactor 6                                                                                                 | 0.0204919 | Yes | No  | No | No | No | No  | No  | No  |
| 129303 | TMEM150  | transmembrane protein 150                                                                                                             | 0.0205041 | Yes | No  | No | No | No | No  | No  | No  |
| 3030   | HADHA    | hydroxyacyl-Coenzyme A dehydrogenase/3-ketoacyl-Coenzyme A thiolase/enoyl-Coenzyme A hydratase (trifunctional protein), alpha subunit | 0.0206441 | Yes | No  | No | No | No | No  | No  | No  |
| 1176   | AP3S1    | adaptor-related protein complex 3, sigma 1 subunit                                                                                    | 0.0206543 | No  | No  | No | No | No | Yes | No  | No  |
| 160    | AP2A1    | adaptor-related protein complex 2, alpha 1 subunit                                                                                    | 0.0206978 | Yes | No  | No | No | No | No  | No  | No  |
| 6584   | SLC22A5  | solute carrier family 22 (organic cation/carnitine transporter), member 5                                                             | 0.0207116 | Yes | No  | No | No | No | No  | No  | No  |
| 143903 | LAYN     | laylin                                                                                                                                | 0.0207446 | Yes | No  | No | No | No | No  | No  | No  |
| 4773   | NFATC2   | nuclear factor of activated T-cells, cytoplasmic, calcineurin-dependent 2                                                             | 0.0207928 | No  | Yes | No | No | No | No  | No  | No  |
| 23175  | LPIN1    | lipin 1                                                                                                                               | 0.0207999 | Yes | No  | No | No | No | No  | No  | No  |

|        |          |                                                                                           |           |     |     |    |    |    |     |     |
|--------|----------|-------------------------------------------------------------------------------------------|-----------|-----|-----|----|----|----|-----|-----|
| 80149  | ZC3H12A  | zinc finger CCCH-type containing 12A                                                      | 0.0208972 | Yes | No  | No | No | No | No  | No  |
| 79087  | ALG12    | asparagine-linked glycosylation 12 homolog (S. cerevisiae, alpha-1,6-mannosyltransferase) | 0.020944  | Yes | No  | No | No | No | No  | No  |
| 5359   | PLSCR1   | phospholipid scramblase 1                                                                 | 0.0209992 | Yes | No  | No | No | No | Yes | No  |
| 773    | CACNA1A  | calcium channel, voltage-dependent, P/Q type, alpha 1A subunit                            | 0.0211193 | Yes | No  | No | No | No | No  | No  |
| 63893  | UBE2O    | ubiquitin-conjugating enzyme E2O                                                          | 0.0211554 | No  | Yes | No | No | No | No  | No  |
| 64757  | MOSC1    | MOCO sulphurase C-terminal domain containing 1                                            | 0.0213076 | Yes | No  | No | No | No | No  | No  |
| 57714  | KIAA1618 | KIAA1618                                                                                  | 0.0213199 | Yes | No  | No | No | No | No  | No  |
| 64114  | TMBIM1   | transmembrane BAX inhibitor motif containing 1                                            | 0.0213509 | Yes | No  | No | No | No | No  | No  |
| 11231  | SEC63    | SEC63 homolog (S. cerevisiae)                                                             | 0.0214783 | Yes | No  | No | No | No | No  | No  |
| 9957   | HS3ST1   | heparan sulfate (glucosamine) 3-O-sulfotransferase 1                                      | 0.021555  | Yes | No  | No | No | No | No  | No  |
| 5009   | OTC      | ornithine carbamoyltransferase                                                            | 0.0215906 | Yes | No  | No | No | No | No  | No  |
| 2621   | GAS6     | growth arrest-specific 6                                                                  | 0.0216744 | Yes | No  | No | No | No | No  | No  |
| 80833  | APOL3    | apolipoprotein L, 3                                                                       | 0.0217095 | Yes | No  | No | No | No | No  | No  |
| 11118  | BTNSA2   | butyrophilin, subfamily 3, member A2                                                      | 0.0217602 | Yes | No  | No | No | No | No  | No  |
| 4046   | LSP1     | lymphocyte-specific protein 1                                                             | 0.0218517 | Yes | No  | No | No | No | No  | No  |
| 5252   | PHF1     | PHD finger protein 1                                                                      | 0.0218825 | Yes | No  | No | No | No | No  | No  |
| 27332  | ZNF638   | zinc finger protein 638                                                                   | 0.0218885 | Yes | No  | No | No | No | No  | No  |
| 4543   | MTNR1A   | melatonin receptor 1A                                                                     | 0.0219187 | Yes | No  | No | No | No | No  | No  |
| 90864  | SPSB3    | splA/ryanodine receptor domain and SOCS box containing 3                                  | 0.0220925 | Yes | No  | No | No | No | No  | No  |
| 28231  | SLCO4A1  | solute carrier organic anion transporter family, member 4A1                               | 0.0221207 | Yes | No  | No | No | No | No  | No  |
| 6916   | TBXAS1   | thromboxane A synthase 1 (platelet, cytochrome P450, family 5, subfamily A)               | 0.0221421 | No  | No  | No | No | No | Yes | No  |
| 10318  | TNIP1    | TNFAIP3 interacting protein 1                                                             | 0.0221721 | Yes | No  | No | No | No | No  | No  |
| 57613  | KIAA1467 | KIAA1467                                                                                  | 0.0221977 | Yes | No  | No | No | No | No  | No  |
| 51084  | CRYL1    | crystallin, lambda 1                                                                      | 0.0222863 | Yes | No  | No | No | No | No  | No  |
| 51276  | ZNF571   | zinc finger protein 571                                                                   | 0.0223281 | Yes | No  | No | No | No | No  | No  |
| 80198  | MUS81    | MUS81 endonuclease homolog (S. cerevisiae)                                                | 0.0223437 | Yes | No  | No | No | No | Yes | No  |
| 57381  | RHOJ     | ras homolog gene family, member J                                                         | 0.022344  | Yes | No  | No | No | No | No  | No  |
| 10673  | TNFSF13B | tumor necrosis factor (ligand) superfamily, member 13b                                    | 0.022411  | Yes | No  | No | No | No | No  | No  |
| 57019  | CIAPIN1  | cytokine induced apoptosis inhibitor 1                                                    | 0.0224114 | Yes | No  | No | No | No | No  | No  |
| 23564  | DDAH2    | dimethylarginine dimethylaminohydrolase 2                                                 | 0.0224858 | Yes | No  | No | No | No | No  | No  |
| 221178 | SPATA13  | spermatogenesis associated 13                                                             | 0.022591  | Yes | No  | No | No | No | No  | No  |
| 10482  | NXF1     | nuclear RNA export factor 1                                                               | 0.0225913 | No  | No  | No | No | No | Yes | Yes |
| 285761 | DCBLD1   | discoidin, CUB and LCCL domain containing 1                                               | 0.0226361 | Yes | No  | No | No | No | No  | No  |
| 8496   | PPF1BP1  | PTPRF interacting protein, binding protein 1 (Iiprin beta 1)                              | 0.0226681 | Yes | No  | No | No | No | No  | No  |

|        |           |                                                                                                 |           |     |     |    |    |    |     |     |     |
|--------|-----------|-------------------------------------------------------------------------------------------------|-----------|-----|-----|----|----|----|-----|-----|-----|
| 2040   | STOM      | stomatin                                                                                        | 0.0227089 | Yes | No  | No | No | No | No  | No  | No  |
| 5325   | PLACL1    | pleiomorphic adenoma gene-like 1                                                                | 0.0227118 | Yes | No  | No | No | No | No  | No  | No  |
| 51454  | GULP1     | GULP, engulfment adaptor PTB domain containing 1                                                | 0.0227224 | Yes | No  | No | No | No | No  | No  | No  |
| 116143 | WDR92     | WD repeat domain 92                                                                             | 0.0228007 | No  | No  | No | No | No | Yes | No  | No  |
| 3239   | HOXD13    | homeobox D13                                                                                    | 0.0229077 | Yes | No  | No | No | No | No  | No  | No  |
| 257358 | LOC257358 | hypothetical protein LOC257358                                                                  | 0.0230462 | NA* | Yes | No | No | No | No  | No  | No  |
| 55275  | VPS53     | vacuolar protein sorting 53 homolog (S. cerevisiae)                                             | 0.0230774 | Yes | No  | No | No | No | No  | No  | No  |
| 11120  | BTN2A1    | butyrophilin, subfamily 2, member A1                                                            | 0.0232232 | Yes | No  | No | No | No | Yes | Yes | Yes |
| 8526   | DGKE      | diacylglycerol kinase, epsilon 64kDa                                                            | 0.023245  | Yes | No  | No | No | No | No  | No  | No  |
| 780    | DDR1      | discoidin domain receptor tyrosine kinase 1                                                     | 0.0232827 | Yes | No  | No | No | No | No  | No  | No  |
| 79955  | PDZD7     | PDZ domain containing 7                                                                         | 0.0233574 | No  | No  | No | No | No | Yes | No  | No  |
| 383    | ARG1      | arginase, liver                                                                                 | 0.023397  | Yes | No  | No | No | No | No  | No  | No  |
| 3600   | IL15      | interleukin 15                                                                                  | 0.0235165 | Yes | No  | No | No | No | No  | No  | No  |
| 84952  | CGNL1     | cingulin-like 1                                                                                 | 0.0235381 | Yes | No  | No | No | No | No  | No  | No  |
| 79931  | TNIP3     | TNFAIP3 interacting protein 3                                                                   | 0.0235715 | Yes | No  | No | No | No | No  | No  | No  |
| 54970  | TTC12     | tetratricopeptide repeat domain 12                                                              | 0.0235929 | Yes | No  | No | No | No | No  | No  | No  |
| 81502  | HMI3      | histocompatibility (minor) 13                                                                   | 0.0236722 | Yes | No  | No | No | No | No  | No  | No  |
| 9975   | NR1D2     | nuclear receptor subfamily 1, group D, member 2                                                 | 0.0238253 | Yes | No  | No | No | No | No  | No  | No  |
| 1051   | CEBPB     | CCAAT/enhancer binding protein (C/EBP), beta                                                    | 0.0238471 | Yes | No  | No | No | No | No  | No  | No  |
| 79191  | IRX3      | iroquois homeobox 3                                                                             | 0.023883  | Yes | No  | No | No | No | No  | No  | No  |
| 3977   | LIFR      | leukemia inhibitory factor receptor alpha                                                       | 0.023979  | Yes | No  | No | No | No | No  | No  | No  |
| 2122   | EVI1      | ecotropic viral integration site 1                                                              | 0.0241567 | Yes | No  | No | No | No | No  | No  | No  |
| 64065  | PERP      | PERP, TP53 apoptosis effector                                                                   | 0.0241902 | Yes | No  | No | No | No | No  | No  | No  |
| 266747 | RGL4      | ral guanine nucleotide dissociation stimulator-like 4                                           | 0.0242559 | Yes | No  | No | No | No | No  | No  | No  |
| 22846  | VASH1     | vasohibin 1                                                                                     | 0.0244688 | Yes | No  | No | No | No | No  | No  | No  |
| 283742 | FAM98B    | family with sequence similarity 98, member B                                                    | 0.0245325 | No  | No  | No | No | No | Yes | No  | No  |
| 3141   | HLCS      | holocarboxylase synthetase (biotin-(propionyl)-Coenzyme A-carboxylase (ATP-hydrolysing)) ligase | 0.0246197 | Yes | No  | No | No | No | No  | No  | No  |
| 56253  | CRTAM     | cytotoxic and regulatory T cell molecule                                                        | 0.024628  | Yes | No  | No | No | No | No  | No  | No  |
| 133396 | IL31RA    | interleukin 31 receptor A                                                                       | 0.024694  | Yes | No  | No | No | No | No  | No  | No  |
| 51076  | CUTC      | cutC copper transporter homolog (E. coli)                                                       | 0.0247283 | No  | No  | No | No | No | Yes | No  | No  |
| 8609   | KLF7      | Kruppel-like factor 7 (ubiquitous)                                                              | 0.0247555 | Yes | No  | No | No | No | No  | No  | No  |
| 64860  | ARMCX5    | armadillo repeat containing, X-linked 5                                                         | 0.0249908 | Yes | No  | No | No | No | No  | No  | No  |
| 55129  | TMEM16K   | transmembrane protein 16K                                                                       | 0.0250694 | Yes | No  | No | No | No | No  | No  | No  |
| 5348   | FXYD1     | FXYD domain containing ion transport regulator 1 (phospholemman)                                | 0.025077  | Yes | No  | No | No | No | No  | No  | No  |

|        |         |                                                                                        |           |     |     |    |    |    |    |     |    |
|--------|---------|----------------------------------------------------------------------------------------|-----------|-----|-----|----|----|----|----|-----|----|
| 7766   | ZNF223  | zinc finger protein 223                                                                | 0.0254227 | Yes | No  | No | No | No | No | Yes | No |
| 56203  | LMOD3   | leiomodin 3 (fetal)                                                                    | 0.0254428 | Yes | No  | No | No | No | No | No  | No |
| 10998  | SLC27A5 | solute carrier family 27 (fatty acid transporter), member 5                            | 0.0254833 | Yes | No  | No | No | No | No | No  | No |
| 90589  | ZNF625  | zinc finger protein 625                                                                | 0.0255005 | No  | Yes | No | No | No | No | No  | No |
| 7791   | ZYX     | zyxin                                                                                  | 0.0255737 | Yes | No  | No | No | No | No | No  | No |
| 208    | AKT2    | v-akt murine thymoma viral oncogene homolog 2                                          | 0.0256329 | Yes | No  | No | No | No | No | No  | No |
| 5317   | PKP1    | plakophilin 1 (ectodermal dysplasia/skin fragility syndrome)                           | 0.0256731 | Yes | No  | No | No | No | No | No  | No |
| 10312  | TCIRG1  | T-cell, immune regulator 1, ATPase, H+ transporting, lysosomal V0 subunit A3           | 0.0257618 | Yes | No  | No | No | No | No | No  | No |
| 602    | BCL3    | B-cell CLL/lymphoma 3                                                                  | 0.0257843 | Yes | No  | No | No | No | No | No  | No |
| 65982  | ZSCAN18 | zinc finger and SCAN domain containing 18                                              | 0.025816  | Yes | No  | No | No | No | No | No  | No |
| 5129   | PCTK3   | PCTAIRE protein kinase 3                                                               | 0.0258269 | Yes | No  | No | No | No | No | No  | No |
| 65999  | LRRC61  | leucine rich repeat containing 61                                                      | 0.0258721 | No  | No  | No | No | No | No | Yes | No |
| 54558  | SPATA6  | spermatogenesis associated 6                                                           | 0.0259346 | Yes | No  | No | No | No | No | No  | No |
| 79792  | GSDMDC1 | gasdermin domain containing 1                                                          | 0.0260365 | Yes | No  | No | No | No | No | No  | No |
| 51     | ACOX1   | acyl-Coenzyme A oxidase 1, palmitoyl                                                   | 0.0261704 | No  | No  | No | No | No | No | Yes | No |
| 3652   | IPP     | intracisternal A particle-promoted polypeptide                                         | 0.0262776 | Yes | No  | No | No | No | No | No  | No |
| 114907 | FBXO32  | F-box protein 32                                                                       | 0.026329  | Yes | No  | No | No | No | No | No  | No |
| 1588   | CYP19A1 | cytochrome P450, family 19, subfamily A, polypeptide 1                                 | 0.0263508 | Yes | No  | No | No | No | No | No  | No |
| 581    | BAX     | BCL2-associated X protein                                                              | 0.026444  | Yes | No  | No | No | No | No | Yes | No |
| 220001 | VWCE    | von Willebrand factor C and EGF domains                                                | 0.0266595 | Yes | No  | No | No | No | No | No  | No |
| 27034  | ACAD8   | acyl-Coenzyme A dehydrogenase family, member 8                                         | 0.0267877 | Yes | No  | No | No | No | No | No  | No |
| 4943   | TBC1D25 | TBC1 domain family, member 25                                                          | 0.0269495 | Yes | No  | No | No | No | No | No  | No |
| 6646   | SOAT1   | sterol O-acyltransferase (acyl-Coenzyme A: cholesterol acyltransferase) 1              | 0.0270502 | Yes | No  | No | No | No | No | No  | No |
| 83888  | FGFBP2  | fibroblast growth factor binding protein 2                                             | 0.0271206 | Yes | No  | No | No | No | No | No  | No |
| 8502   | PKP4    | plakophilin 4                                                                          | 0.0271426 | Yes | No  | No | No | No | No | No  | No |
| 5954   | RCN1    | reticulocalbin 1, EF-hand calcium binding domain                                       | 0.0271603 | Yes | No  | No | No | No | No | No  | No |
| 2905   | GRIN2C  | glutamate receptor, ionotropic, N-methyl D-aspartate 2C                                | 0.0271656 | Yes | No  | No | No | No | No | No  | No |
| 57647  | DHX37   | DEAH (Asp-Glu-Ala-His) box polypeptide 37                                              | 0.0271809 | Yes | No  | No | No | No | No | No  | No |
| 54658  | UGT1A1  | UDP glucuronosyltransferase 1 family, polypeptide A1                                   | 0.0272963 | Yes | No  | No | No | No | No | No  | No |
| 858    | CAV2    | caveolin 2                                                                             | 0.0273073 | Yes | No  | No | No | No | No | No  | No |
| 3084   | NRG1    | neuregulin 1                                                                           | 0.0273281 | Yes | No  | No | No | No | No | No  | No |
| 132789 | GNPDA2  | glucosamine-6-phosphate deaminase 2                                                    | 0.0273392 | Yes | No  | No | No | No | No | No  | No |
| 223117 | SEMA3D  | sema domain, immunoglobulin domain (Ig), short basic domain, secreted, (semaphorin) 3D | 0.0274335 | Yes | No  | No | No | No | No | No  | No |
| 10039  | PARP3   | poly (ADP-ribose) polymerase family, member 3                                          | 0.0275276 | Yes | No  | No | No | No | No | Yes | No |



|        |          |                                                                                   |           |     |     |    |    |    |    |     |    |
|--------|----------|-----------------------------------------------------------------------------------|-----------|-----|-----|----|----|----|----|-----|----|
| 59307  | SIGIRR   | single immunoglobulin and toll-interleukin 1 receptor (TIR) domain                | 0.027642  | Yes | No  | No | No | No | No | No  | No |
| 5076   | PAX2     | paired box 2                                                                      | 0.0277798 | Yes | No  | No | No | No | No | No  | No |
| 771    | CA12     | carbonic anhydrase XII                                                            | 0.0277904 | Yes | No  | No | No | No | No | No  | No |
| 55437  | ALS2CR2  | amyotrophic lateral sclerosis 2 (juvenile) chromosome region, candidate 2         | 0.0278204 | Yes | No  | No | No | No | No | No  | No |
| 5899   | RALB     | v-ral simian leukemia viral oncogene homolog B (ras related; GTP binding protein) | 0.0278213 | Yes | Yes | No | No | No | No | No  | No |
| 212    | ALAS2    | aminolevulinic acid, delta-, synthase 2                                           | 0.0278279 | Yes | No  | No | No | No | No | No  | No |
| 54662  | TBC1D13  | TBC1 domain family, member 13                                                     | 0.0278737 | Yes | No  | No | No | No | No | No  | No |
| 83716  | CRISPLD2 | cysteine-rich secretory protein LCCL domain containing 2                          | 0.02788   | Yes | No  | No | No | No | No | No  | No |
| 699    | BUB1     | BUB1 budding uninhibited by benzimidazoles 1 homolog (yeast)                      | 0.0278801 | No  | No  | No | No | No | No | Yes | No |
| 8454   | CUL1     | culin 1                                                                           | 0.0279803 | Yes | No  | No | No | No | No | No  | No |
| 25890  | ABI3BP   | ABI gene family, member 3 (NESH) binding protein                                  | 0.0280188 | Yes | No  | No | No | No | No | No  | No |
| 4224   | MEP1A    | mepirin A, alpha (PABA peptide hydrolase)                                         | 0.0280633 | Yes | No  | No | No | No | No | No  | No |
| 10124  | ARL4A    | ADP-ribosylation factor-like 4A                                                   | 0.0282002 | Yes | No  | No | No | No | No | No  | No |
| 51422  | PRKAG2   | protein kinase, AMP-activated, gamma 2 non-catalytic subunit                      | 0.028227  | Yes | Yes | No | No | No | No | No  | No |
| 10493  | VAT1     | vesicle amine transport protein 1 homolog (T. californica)                        | 0.0283861 | Yes | No  | No | No | No | No | No  | No |
| 8643   | PTCH2    | patched homolog 2 (Drosophila)                                                    | 0.0285258 | Yes | No  | No | No | No | No | No  | No |
| 9946   | CRYZL1   | crystallin, zeta (quinone reductase)-like 1                                       | 0.0286034 | Yes | No  | No | No | No | No | No  | No |
| 83657  | DYNLRB2  | dynein, light chain, roadblock-type 2                                             | 0.0286703 | Yes | No  | No | No | No | No | No  | No |
| 53917  | RAB24    | RAB24, member RAS oncogene family                                                 | 0.0287404 | Yes | No  | No | No | No | No | Yes | No |
| 65264  | UBE2Z    | ubiquitin-conjugating enzyme E2Z                                                  | 0.0288257 | Yes | No  | No | No | No | No | No  | No |
| 129450 | C2orf60  | chromosome 2 open reading frame 60                                                | 0.0288306 | Yes | No  | No | No | No | No | No  | No |
| 89795  | NAV3     | neuron navigator 3                                                                | 0.0289117 | Yes | No  | No | No | No | No | No  | No |
| 10879  | SMR3B    | submaxillary gland androgen regulated protein 3B                                  | 0.0290417 | Yes | No  | No | No | No | No | No  | No |
| 23386  | NUDCD3   | NudC domain containing 3                                                          | 0.0292033 | No  | No  | No | No | No | No | Yes | No |
| 1282   | COL4A1   | collagen, type IV, alpha 1                                                        | 0.029234  | Yes | No  | No | No | No | No | No  | No |
| 3795   | KHK      | ketohexokinase (fructokinase)                                                     | 0.0292376 | Yes | No  | No | No | No | No | No  | No |
| 78990  | OTUB2    | OTU domain, ubiquitin aldehyde binding 2                                          | 0.0292614 | Yes | No  | No | No | No | No | No  | No |
| 56138  | PCDHA11  | protocadherin alpha 11                                                            | 0.0293537 | Yes | No  | No | No | No | No | No  | No |
| 4833   | NME4     | non-metastatic cells 4, protein expressed in                                      | 0.0293579 | Yes | No  | No | No | No | No | No  | No |
| 9057   | SLC7A6   | solute carrier family 7 (cationic amino acid transporter, y+ system), member 6    | 0.0294107 | Yes | No  | No | No | No | No | No  | No |
| 56137  | PCDHA12  | protocadherin alpha 12                                                            | 0.029472  | Yes | No  | No | No | No | No | No  | No |
| 64344  | HIF3A    | hypoxia inducible factor 3, alpha subunit                                         | 0.0295488 | Yes | No  | No | No | No | No | No  | No |
| 9478   | CABP1    | calcium binding protein 1                                                         | 0.0295792 | Yes | No  | No | No | No | No | No  | No |
| 2840   | GPR17    | G protein-coupled receptor 17                                                     | 0.0298383 | Yes | No  | No | No | No | No | No  | No |

|        |          |                                                                                          |           |     |     |    |    |    |    |     |     |
|--------|----------|------------------------------------------------------------------------------------------|-----------|-----|-----|----|----|----|----|-----|-----|
| 5525   | PPP2R5A  | protein phosphatase 2, regulatory subunit B, alpha isoform                               | 0.0301365 | Yes | No  | No | No | No | No | No  | No  |
| 54751  | FBLIM1   | filamin binding LIM protein 1                                                            | 0.0302134 | Yes | No  | No | No | No | No | No  | No  |
| 151254 | ALS2CR11 | amyotrophic lateral sclerosis 2 (juvenile) chromosome region, candidate 11               | 0.0304027 | Yes | No  | No | No | No | No | No  | No  |
| 9021   | SOCS3    | suppressor of cytokine signaling 3                                                       | 0.0304489 | Yes | No  | No | No | No | No | Yes | No  |
| 5008   | OSM      | oncostatin M                                                                             | 0.0304902 | No  | No  | No | No | No | No | Yes | No  |
| 27101  | CACYBP   | calyculin binding protein                                                                | 0.0306699 | No  | No  | No | No | No | No | Yes | No  |
| 54845  | RBM35A   | RNA binding motif protein 35A                                                            | 0.0306802 | Yes | No  | No | No | No | No | No  | No  |
| 735    | C9       | complement component 9                                                                   | 0.0308693 | Yes | No  | No | No | No | No | No  | No  |
| 30848  | CTAG2    | cancer/testis antigen 2                                                                  | 0.0309629 | Yes | No  | No | No | No | No | No  | No  |
| 324    | APC      | adenomatous polyposis coli                                                               | 0.0309771 | Yes | No  | No | No | No | No | No  | No  |
| 56751  | BARHL1   | BarH-like homeobox 1                                                                     | 0.0310333 | Yes | No  | No | No | No | No | No  | No  |
| 5337   | PLD1     | phospholipase D1, phosphatidylcholine-specific                                           | 0.0311493 | Yes | No  | No | No | No | No | No  | No  |
| 6125   | RPL5     | ribosomal protein L5                                                                     | 0.0312449 | Yes | No  | No | No | No | No | Yes | No  |
| 55501  | CHST12   | carbohydrate (chondroitin 4) sulfotransferase 12                                         | 0.0312608 | Yes | No  | No | No | No | No | No  | No  |
| 259197 | NCR3     | natural cytotoxicity triggering receptor 3                                               | 0.0313056 | Yes | No  | No | No | No | No | No  | No  |
| 24139  | EML2     | echinoderm microtubule associated protein like 2                                         | 0.0313289 | Yes | No  | No | No | No | No | No  | No  |
| 57513  | CASKIN2  | CASK interacting protein 2                                                               | 0.0314492 | Yes | No  | No | No | No | No | No  | No  |
| 51651  | PTRH2    | peptidyl-tRNA hydrolase 2                                                                | 0.0314687 | No  | No  | No | No | No | No | Yes | No  |
| 26152  | ZNF337   | zinc finger protein 337                                                                  | 0.0314799 | Yes | No  | No | No | No | No | No  | No  |
| 2212   | FCGR2A   | Fc fragment of IgG, low affinity IIa, receptor (CD32)                                    | 0.0314825 | Yes | No  | No | No | No | No | No  | No  |
| 245802 | MS4A6E   | membrane-spanning 4-domains, subfamily A, member 6E                                      | 0.0315853 | Yes | No  | No | No | No | No | No  | No  |
| 26298  | EHF      | ets homologous factor                                                                    | 0.0316316 | Yes | No  | No | No | No | No | No  | No  |
| 255631 | COL24A1  | collagen, type XXIV, alpha 1                                                             | 0.0318276 | Yes | No  | No | No | No | No | No  | No  |
| 5139   | PDE3A    | phosphodiesterase 3A, cGMP-inhibited                                                     | 0.0319297 | Yes | No  | No | No | No | No | No  | No  |
| 79748  | LMAN1L   | lectin, mannose-binding, 1 like                                                          | 0.0319519 | Yes | No  | No | No | No | No | No  | No  |
| 33     | ACADL    | acyl-Coenzyme A dehydrogenase, long chain                                                | 0.0319554 | Yes | No  | No | No | No | No | No  | No  |
| 10855  | HPSE     | heparanase                                                                               | 0.0320146 | Yes | Yes | No | No | No | No | No  | No  |
| 51368  | TEX264   | testis expressed 264                                                                     | 0.0320925 | Yes | No  | No | No | No | No | No  | No  |
| 9698   | PUM1     | pumilio homolog 1 (Drosophila)                                                           | 0.0325228 | No  | No  | No | No | No | No | Yes | Yes |
| 10195  | ALG3     | asparagine-linked glycosylation 3 homolog (S. cerevisiae, alpha-1,3-mannosyltransferase) | 0.0325758 | Yes | No  | No | No | No | No | Yes | No  |
| 837    | CASP4    | caspase 4, apoptosis-related cysteine peptidase                                          | 0.0326123 | Yes | No  | No | No | No | No | No  | No  |
| 79719  | FLJ11506 | hypothetical protein FLJ11506                                                            | 0.0326296 | Yes | No  | No | No | No | No | No  | No  |
| 23550  | PSD4     | pleckstrin and Sec7 domain containing 4                                                  | 0.0327952 | Yes | No  | No | No | No | No | Yes | Yes |
| 2529   | FUT7     | fucosyltransferase 7 (alpha (1,3) fucosyltransferase)                                    | 0.0328991 | Yes | No  | No | No | No | No | Yes | Yes |

|        |          |                                                                      |           |     |     |    |    |    |    |     |    |
|--------|----------|----------------------------------------------------------------------|-----------|-----|-----|----|----|----|----|-----|----|
| 84733  | CBX2     | chromobox homolog 2 (Pc class homolog, Drosophila)                   | 0.0329106 | No  | No  | No | No | No | No | Yes | No |
| 55647  | RAB20    | RAB20, member RAS oncogene family                                    | 0.032936  | Yes | No  | No | No | No | No | No  | No |
| 151790 | WDR49    | WD repeat domain 49                                                  | 0.032958  | Yes | No  | No | No | No | No | No  | No |
| 4015   | LOX      | lysyl oxidase                                                        | 0.033026  | Yes | No  | No | No | No | No | No  | No |
| 3039   | HBA1     | hemoglobin, alpha 1                                                  | 0.0331877 | Yes | No  | No | No | No | No | No  | No |
| 5592   | PRKG1    | protein kinase, cGMP-dependent, type I                               | 0.0332482 | Yes | No  | No | No | No | No | No  | No |
| 81031  | SLC2A10  | solute carrier family 2 (facilitated glucose transporter), member 10 | 0.0332836 | Yes | No  | No | No | No | No | No  | No |
| 6137   | RPL13    | ribosomal protein L13                                                | 0.0332842 | Yes | No  | No | No | No | No | No  | No |
| 9045   | RPL14    | ribosomal protein L14                                                | 0.0333346 | No  | No  | No | No | No | No | Yes | No |
| 80325  | ABTB1    | ankyrin repeat and BTB (POZ) domain containing 1                     | 0.0334318 | Yes | No  | No | No | No | No | No  | No |
| 51652  | VPS24    | vacuolar protein sorting 24 homolog (S. cerevisiae)                  | 0.0335021 | Yes | No  | No | No | No | No | No  | No |
| 9729   | KIAA0408 | KIAA0408                                                             | 0.0335101 | Yes | No  | No | No | No | No | No  | No |
| 4047   | LSS      | lanosterol synthase (2,3-oxidosqualene-lanosterol cyclase)           | 0.0337077 | Yes | No  | No | No | No | No | No  | No |
| 152815 | THAP6    | THAP domain containing 6                                             | 0.0338477 | Yes | No  | No | No | No | No | No  | No |
| 7572   | ZNF24    | zinc finger protein 24                                               | 0.0339108 | Yes | No  | No | No | No | No | No  | No |
| 132014 | IL17RE   | interleukin 17 receptor E                                            | 0.0339502 | Yes | No  | No | No | No | No | No  | No |
| 4926   | NUMA1    | nuclear mitotic apparatus protein 1                                  | 0.0340371 | Yes | No  | No | No | No | No | No  | No |
| 161291 | TMEM30B  | transmembrane protein 30B                                            | 0.0341747 | Yes | No  | No | No | No | No | No  | No |
| 54461  | FBXW5    | F-box and WD repeat domain containing 5                              | 0.0342968 | No  | No  | No | No | No | No | Yes | No |
| 57573  | ZNF471   | zinc finger protein 471                                              | 0.0343355 | Yes | No  | No | No | No | No | No  | No |
| 79716  | NPEPL1   | aminopeptidase-like 1                                                | 0.0343375 | Yes | No  | No | No | No | No | No  | No |
| 8559   | PRPF18   | PRP18 pre-mRNA processing factor 18 homolog (S. cerevisiae)          | 0.0344328 | No  | No  | No | No | No | No | Yes | No |
| 50839  | TAS2R10  | taste receptor, type 2, member 10                                    | 0.0345006 | Yes | No  | No | No | No | No | No  | No |
| 4824   | NKX3-1   | NK3 homeobox 1                                                       | 0.034618  | Yes | No  | No | No | No | No | No  | No |
| 9249   | DHRS3    | dehydrogenase/reductase (SDR family) member 3                        | 0.0347167 | Yes | No  | No | No | No | No | No  | No |
| 3985   | LIMK2    | LIM domain kinase 2                                                  | 0.0348001 | No  | Yes | No | No | No | No | No  | No |
| 121512 | FGD4     | FYVE, RhoGEF and PH domain containing 4                              | 0.0350186 | Yes | Yes | No | No | No | No | No  | No |
| 202559 | KHDRBS2  | KH domain containing, RNA binding, signal transduction associated 2  | 0.0350461 | Yes | No  | No | No | No | No | No  | No |
| 5917   | RARS     | arginyl-tRNA synthetase                                              | 0.0351189 | Yes | No  | No | No | No | No | No  | No |
| 9498   | SLC4A8   | solute carrier family 4, sodium bicarbonate cotransporter, member 8  | 0.0351598 | No  | Yes | No | No | No | No | No  | No |
| 923    | CD6      | CD6 molecule                                                         | 0.0351725 | Yes | No  | No | No | No | No | No  | No |
| 55238  | SLC38A7  | solute carrier family 38, member 7                                   | 0.0352057 | Yes | No  | No | No | No | No | No  | No |
| 7802   | DNALI1   | dynein, axonemal, light intermediate chain 1                         | 0.0353024 | Yes | No  | No | No | No | No | No  | No |
| 7991   | TUSC3    | tumor suppressor candidate 3                                         | 0.0353276 | Yes | No  | No | No | No | No | No  | No |

|        |           |                                                                                      |           |     |     |    |    |    |     |     |    |
|--------|-----------|--------------------------------------------------------------------------------------|-----------|-----|-----|----|----|----|-----|-----|----|
| 6282   | S100A11   | S100 calcium binding protein A11                                                     | 0.0355147 | Yes | No  | No | No | No | No  | No  | No |
| 5141   | PDE4A     | phosphodiesterase 4A, cAMP-specific (phosphodiesterase E2 dunce homolog, Drosophila) | 0.0356478 | Yes | No  | No | No | No | No  | No  | No |
| 23682  | RAB38     | RAB38, member RAS oncogene family                                                    | 0.0356598 | Yes | No  | No | No | No | No  | No  | No |
| 3162   | HMOX1     | heme oxygenase (decycling) 1                                                         | 0.0356789 | Yes | No  | No | No | No | No  | No  | No |
| 1576   | CYP3A4    | cytochrome P450, family 3, subfamily A, polypeptide 4                                | 0.0356952 | Yes | No  | No | No | No | No  | No  | No |
| 7450   | VWF       | von Willebrand factor                                                                | 0.0357754 | Yes | No  | No | No | No | No  | No  | No |
| 150383 | LOC150383 | similar to RIKEN cDNA 2210021.J22                                                    | 0.0357787 | No  | Yes | No | No | No | No  | No  | No |
| 10589  | DRAP1     | DR1-associated protein 1 (negative cofactor 2 alpha)                                 | 0.0358602 | Yes | No  | No | No | No | No  | No  | No |
| 5130   | PCYT1A    | phosphate cytidylyltransferase 1, choline, alpha                                     | 0.0359021 | Yes | No  | No | No | No | No  | No  | No |
| 6249   | CLIP1     | CAP-GLY domain containing linker protein 1                                           | 0.0359529 | Yes | No  | No | No | No | Yes | No  | No |
| 23381  | SMG5      | Smg-5 homolog, nonsense mediated mRNA decay factor (C. elegans)                      | 0.0360553 | No  | No  | No | No | No | Yes | No  | No |
| 25817  | FAM19A5   | family with sequence similarity 19 (chemokine (C-C motif)-like), member A5           | 0.0360893 | Yes | No  | No | No | No | No  | No  | No |
| 4494   | MT1F      | metallothionein 1F                                                                   | 0.0366448 | Yes | No  | No | No | No | No  | No  | No |
| 29914  | UBIAD1    | UbiA prenyltransferase domain containing 1                                           | 0.0366473 | Yes | No  | No | No | No | No  | No  | No |
| 91734  | ID2       | isopentenyl-diphosphate delta isomerase 2                                            | 0.0367367 | Yes | No  | No | No | No | No  | No  | No |
| 25806  | VAX2      | ventral anterior homeobox 2                                                          | 0.0367517 | Yes | No  | No | No | No | No  | No  | No |
| 283254 | C11orf77  | chromosome 11 open reading frame 77                                                  | 0.0367888 | No  | No  | No | No | No | Yes | No  | No |
| 11185  | INMT      | indolethylamine N-methyltransferase                                                  | 0.0370854 | Yes | No  | No | No | No | No  | No  | No |
| 6892   | TAPBP     | TAP binding protein (tapasin)                                                        | 0.037193  | Yes | No  | No | No | No | No  | No  | No |
| 4501   | MT1X      | metallothionein 1X                                                                   | 0.0373215 | Yes | Yes | No | No | No | No  | No  | No |
| 84449  | ZNF333    | zinc finger protein 333                                                              | 0.0375763 | Yes | No  | No | No | No | No  | No  | No |
| 7737   | RNF113A   | ring finger protein 113A                                                             | 0.0375812 | No  | No  | No | No | No | Yes | Yes | No |
| 10025  | MED16     | mediator complex subunit 16                                                          | 0.0376257 | Yes | No  | No | No | No | Yes | No  | No |
| 1026   | CDKN1A    | cyclin-dependent kinase inhibitor 1A (p21, Cip1)                                     | 0.0377106 | Yes | No  | No | No | No | No  | No  | No |
| 222255 | ATXN7L1   | ataxin 7-like 1                                                                      | 0.0378013 | Yes | No  | No | No | No | No  | No  | No |
| 64763  | ZNF574    | zinc finger protein 574                                                              | 0.0379412 | No  | Yes | No | No | No | No  | No  | No |
| 10253  | SPRY2     | sprouty homolog 2 (Drosophila)                                                       | 0.0380377 | Yes | No  | No | No | No | No  | No  | No |
| 404037 | HAPLN4    | hyaluronan and proteoglycan link protein 4                                           | 0.038157  | Yes | No  | No | No | No | No  | No  | No |
| 10565  | ARFGEF1   | ADP-ribosylation factor guanine nucleotide-exchange factor 1 (brefeldin A-inhibited) | 0.0383615 | No  | No  | No | No | No | Yes | No  | No |
| 1742   | DLG4      | discs, large homolog 4 (Drosophila)                                                  | 0.0384291 | No  | No  | No | No | No | Yes | No  | No |
| 58524  | DMRT3     | doublesex and mab-3 related transcription factor 3                                   | 0.0387152 | Yes | No  | No | No | No | No  | No  | No |
| 9423   | NTN1      | netrin 1                                                                             | 0.0387177 | Yes | No  | No | No | No | No  | No  | No |
| 257397 | MAP3K7IP3 | mitogen-activated protein kinase kinase kinase 7 interacting protein 3               | 0.0387479 | Yes | No  | No | No | No | No  | No  | No |
| 6942   | TCF20     | transcription factor 20 (AR1)                                                        | 0.0387542 | Yes | No  | No | No | No | No  | No  | No |

|        |          |                                                                                                    |           |     |     |    |    |    |    |     |    |
|--------|----------|----------------------------------------------------------------------------------------------------|-----------|-----|-----|----|----|----|----|-----|----|
| 3848   | KRT1     | keratin 1 (epidermolytic hyperkeratosis)                                                           | 0.0388123 | Yes | No  | No | No | No | No | No  | No |
| 1901   | S1PR1    | sphingosine-1-phosphate receptor 1                                                                 | 0.0388655 | Yes | No  | No | No | No | No | No  | No |
| 27439  | CECR6    | cat eye syndrome chromosome region, candidate 6                                                    | 0.0389658 | Yes | No  | No | No | No | No | No  | No |
| 93663  | ARHGAP18 | Rho GTPase activating protein 18                                                                   | 0.0389687 | Yes | Yes | No | No | No | No | No  | No |
| 4998   | ORC1L    | origin recognition complex, subunit 1-like (yeast)                                                 | 0.0389815 | No  | No  | No | No | No | No | Yes | No |
| 9647   | PPM1F    | protein phosphatase 1F (PP2C domain containing)                                                    | 0.0391119 | Yes | No  | No | No | No | No | No  | No |
| 57626  | KLHL1    | kelch-like 1 (Drosophila)                                                                          | 0.0391592 | Yes | No  | No | No | No | No | No  | No |
| 64766  | S100BP   | S100P binding protein                                                                              | 0.0394759 | No  | No  | No | No | No | No | Yes | No |
| 8638   | OASL     | 2'-5'-oligoadenylate synthetase-like                                                               | 0.0394982 | Yes | No  | No | No | No | No | No  | No |
| 148979 | GLIS1    | GLIS family zinc finger 1                                                                          | 0.0398656 | Yes | No  | No | No | No | No | No  | No |
| 94027  | CGB7     | chorionic gonadotropin, beta polypeptide 7                                                         | 0.040084  | Yes | No  | No | No | No | No | No  | No |
| 9486   | CHST10   | carbohydrate sulfotransferase 10                                                                   | 0.0402836 | Yes | No  | No | No | No | No | No  | No |
| 5142   | PDE4B    | phosphodiesterase 4B, cAMP-specific (phosphodiesterase E4 dunce homolog, Drosophila)               | 0.0407995 | Yes | No  | No | No | No | No | No  | No |
| 1788   | DNMT3A   | DNA (cytosine-5-)-methyltransferase 3 alpha                                                        | 0.0409172 | Yes | Yes | No | No | No | No | No  | No |
| 7798   | LUZP1    | leucine zipper protein 1                                                                           | 0.0413899 | Yes | Yes | No | No | No | No | No  | No |
| 9836   | LCMT2    | leucine carboxyl methyltransferase 2                                                               | 0.0414695 | Yes | No  | No | No | No | No | No  | No |
| 58484  | NLRC4    | NLR family, CARD domain containing 4                                                               | 0.0415691 | Yes | No  | No | No | No | No | No  | No |
| 55973  | BCAP29   | B-cell receptor-associated protein 29                                                              | 0.0417372 | Yes | No  | No | No | No | No | No  | No |
| 162417 | NAGS     | N-acetylglutamate synthase                                                                         | 0.041818  | Yes | No  | No | No | No | No | No  | No |
| 1956   | EGFR     | epidermal growth factor receptor (erythroblastic leukemia viral (v-erb-b) oncogene homolog, avian) | 0.0422246 | Yes | No  | No | No | No | No | No  | No |
| 785    | CACNB4   | calcium channel, voltage-dependent, beta 4 subunit                                                 | 0.0424892 | Yes | No  | No | No | No | No | No  | No |
| 26270  | FBXO6    | F-box protein 6                                                                                    | 0.0425172 | Yes | No  | No | No | No | No | No  | No |
| 3709   | ITPR2    | inositol 1,4,5-triphosphate receptor, type 2                                                       | 0.0425409 | Yes | No  | No | No | No | No | Yes | No |
| 57530  | CGN      | cingulin                                                                                           | 0.0425446 | Yes | No  | No | No | No | No | No  | No |
| 826    | CAPNS1   | calpain, small subunit 1                                                                           | 0.0426436 | Yes | No  | No | No | No | No | No  | No |
| 6256   | RXRA     | retinoid X receptor, alpha                                                                         | 0.0428543 | Yes | No  | No | No | No | No | No  | No |
| 26064  | RAI14    | retinoic acid induced 14                                                                           | 0.0429187 | Yes | No  | No | No | No | No | No  | No |
| 54520  | CCDC93   | coiled-coil domain containing 93                                                                   | 0.0431262 | Yes | No  | No | No | No | No | No  | No |
| 9736   | USP34    | ubiquitin specific peptidase 34                                                                    | 0.0431329 | No  | No  | No | No | No | No | Yes | No |
| 3172   | HNF4A    | hepatocyte nuclear factor 4, alpha                                                                 | 0.0431344 | Yes | No  | No | No | No | No | No  | No |
| 9246   | UBE2L6   | ubiquitin-conjugating enzyme E2L 6                                                                 | 0.0431365 | Yes | No  | No | No | No | No | No  | No |
| 10207  | INADL    | InaD-like (Drosophila)                                                                             | 0.0433468 | Yes | No  | No | No | No | No | No  | No |
| 388335 | TMEM220  | transmembrane protein 220                                                                          | 0.0436985 | Yes | Yes | No | No | No | No | No  | No |
| 63916  | ELMO2    | engulfment and cell motility 2                                                                     | 0.0437759 | Yes | No  | No | No | No | No | No  | No |

|        |          |                                                                                                                                                  |           |     |     |    |    |    |     |     |     |
|--------|----------|--------------------------------------------------------------------------------------------------------------------------------------------------|-----------|-----|-----|----|----|----|-----|-----|-----|
| 3354   | HTR1E    | 5-hydroxytryptamine (serotonin) receptor 1E                                                                                                      | 0.0438526 | No  | Yes | No | No | No | No  | No  | No  |
| 133558 | FLJ40243 | hypothetical protein FLJ40243                                                                                                                    | 0.0440849 | Yes | No  | No | No | No | No  | No  | No  |
| 6692   | SPINT1   | serine peptidase inhibitor, Kunitz type 1                                                                                                        | 0.0441027 | Yes | No  | No | No | No | No  | No  | No  |
| 1646   | AKR1C2   | aldo-keto reductase family 1, member C2 (dihydrodiol dehydrogenase 2; bile acid binding protein; 3-alpha hydroxysteroid dehydrogenase, type III) | 0.0443139 | Yes | No  | No | No | No | No  | No  | No  |
| 4914   | NTRK1    | neurotrophic tyrosine kinase, receptor, type 1                                                                                                   | 0.0443759 | No  | Yes | No | No | No | No  | No  | No  |
| 7466   | WFS1     | Wolfram syndrome 1 (wolframin)                                                                                                                   | 0.0443765 | Yes | No  | No | No | No | No  | No  | No  |
| 25981  | DNAH1    | dynein, axonemal, heavy chain 1                                                                                                                  | 0.044458  | Yes | No  | No | No | No | No  | No  | No  |
| 29922  | NME7     | non-metastatic cells 7, protein expressed in (nucleoside-diphosphate kinase)                                                                     | 0.044482  | No  | No  | No | No | No | Yes | No  | No  |
| 11321  | GPN1     | GPN-loop GTPase 1                                                                                                                                | 0.0445239 | No  | No  | No | No | No | Yes | No  | No  |
| 1263   | PLK3     | polo-like kinase 3 (Drosophila)                                                                                                                  | 0.0449386 | Yes | No  | No | No | No | No  | No  | No  |
| 222235 | FBXL13   | F-box and leucine-rich repeat protein 13                                                                                                         | 0.0450142 | Yes | No  | No | No | No | No  | No  | No  |
| 1230   | CCR1     | chemokine (C-C motif) receptor 1                                                                                                                 | 0.0450348 | Yes | No  | No | No | No | No  | No  | No  |
| 4600   | MX2      | myxovirus (influenza virus) resistance 2 (mouse)                                                                                                 | 0.0450379 | Yes | No  | No | No | No | No  | No  | No  |
| 55621  | TRMT1    | TRM1 (RNA methyltransferase 1 homolog (S. cerevisiae))                                                                                           | 0.0450918 | Yes | No  | No | No | No | Yes | Yes | Yes |
| 9562   | MINPP1   | multiple inositol polyphosphate histidine phosphatase, 1                                                                                         | 0.0455059 | Yes | Yes | No | No | No | No  | No  | No  |
| 196383 | RILPL2   | Rab interacting lysosomal protein-like 2                                                                                                         | 0.0455538 | Yes | Yes | No | No | No | No  | No  | No  |
| 78987  | CRELD1   | cysteine-rich with EGF-like domains 1                                                                                                            | 0.0461609 | Yes | No  | No | No | No | No  | No  | No  |
| 4839   | NOL1     | nucleolar protein 1, 120kDa                                                                                                                      | 0.0462735 | No  | No  | No | No | No | Yes | No  | No  |
| 54505  | DHX29    | DEAH (Asp-Glu-Ala-His) box polypeptide 29                                                                                                        | 0.0464431 | No  | No  | No | No | No | Yes | No  | No  |
| 23061  | TBC1D9B  | TBC1 domain family, member 9B (with GRAM domain)                                                                                                 | 0.0465854 | Yes | No  | No | No | No | No  | No  | No  |
| 55711  | FAR2     | fatty acyl CoA reductase 2                                                                                                                       | 0.0466952 | Yes | No  | No | No | No | No  | No  | No  |
| 136227 | EMID2    | EMI domain containing 2                                                                                                                          | 0.0468219 | Yes | No  | No | No | No | No  | No  | No  |
| 28512  | NKIRAS1  | NFKB inhibitor interacting Ras-like 1                                                                                                            | 0.0468702 | Yes | No  | No | No | No | Yes | No  | No  |
| 4650   | MYO9B    | myosin IXB                                                                                                                                       | 0.0473368 | Yes | No  | No | No | No | No  | No  | No  |
| 6296   | ACSM3    | acyl-CoA synthetase medium-chain family member 3                                                                                                 | 0.0478333 | Yes | No  | No | No | No | No  | No  | No  |
| 51168  | MYO15A   | myosin XVa                                                                                                                                       | 0.0478394 | Yes | No  | No | No | No | No  | No  | No  |
| 54455  | FBXO42   | F-box protein 42                                                                                                                                 | 0.0479803 | Yes | No  | No | No | No | No  | No  | No  |
| 10723  | SLC12A7  | solute carrier family 12 (potassium/chloride transporters), member 7                                                                             | 0.0481539 | Yes | No  | No | No | No | No  | No  | No  |
| 2273   | FHL1     | four and a half LIM domains 1                                                                                                                    | 0.0484017 | Yes | No  | No | No | No | No  | No  | No  |
| 5204   | PFDN5    | prefoldin subunit 5                                                                                                                              | 0.0484543 | Yes | No  | No | No | No | No  | No  | No  |
| 348035 | MGC40069 | hypothetical protein MGC40069                                                                                                                    | 0.0486149 | Yes | No  | No | No | No | No  | No  | No  |
| 9640   | ZNF592   | zinc finger protein 592                                                                                                                          | 0.0488358 | Yes | No  | No | No | No | Yes | No  | No  |
| 1045   | CDX2     | caudal type homeobox 2                                                                                                                           | 0.0489359 | Yes | No  | No | No | No | No  | No  | No  |
| 131034 | CPNE4    | copine IV                                                                                                                                        | 0.0489442 | Yes | No  | No | No | No | No  | No  | No  |

|        |            |                                                                                                              |           |     |     |    |    |    |    |     |    |
|--------|------------|--------------------------------------------------------------------------------------------------------------|-----------|-----|-----|----|----|----|----|-----|----|
| 1117   | CHI3L2     | chitinase 3-like 2                                                                                           | 0.0489474 | Yes | No  | No | No | No | No | No  | No |
| 6279   | S100A8     | S100 calcium binding protein A8                                                                              | 0.0490619 | Yes | No  | No | No | No | No | No  | No |
| 120526 | DPH4       | DPH4, JJJ3 homolog (S. cerevisiae)                                                                           | 0.0490878 | Yes | Yes | No | No | No | No | No  | No |
| 10610  | ST6GALNAC2 | ST6 (alpha-N-acetylneuraminyl-2,3-beta-galactosyl-1,3)-N-acetylgalactosaminide alpha-2,6-sialyltransferase 2 | 0.0492121 | Yes | No  | No | No | No | No | No  | No |
| 64983  | MRPL32     | mitochondrial ribosomal protein L32                                                                          | 0.0496382 | No  | No  | No | No | No | No | Yes | No |
| 5264   | PHYH       | phytanoyl-CoA 2-hydroxylase                                                                                  | 0.0497659 | Yes | No  | No | No | No | No | No  | No |
| 429    | ASCL1      | achaete-scute complex homolog 1 (Drosophila)                                                                 | 0.0502673 | Yes | No  | No | No | No | No | No  | No |
| 2560   | GABRB1     | gamma-aminobutyric acid (GABA) A receptor, beta 1                                                            | 0.0503409 | Yes | No  | No | No | No | No | No  | No |
| 23181  | DIP2A      | DIP2 disco-interacting protein 2 homolog A (Drosophila)                                                      | 0.0503562 | Yes | No  | No | No | No | No | No  | No |
| 1838   | DTNB       | dystrobrevin, beta                                                                                           | 0.0505387 | Yes | No  | No | No | No | No | No  | No |
| 9672   | EIF4G3     | eukaryotic translation initiation factor 4 gamma, 3                                                          | 0.0507779 | Yes | No  | No | No | No | No | No  | No |
| 7423   | VEGFB      | vascular endothelial growth factor B                                                                         | 0.0507922 | Yes | No  | No | No | No | No | No  | No |
| 144715 | RAD9B      | RAD9 homolog B (S. cerevisiae)                                                                               | 0.0508728 | No  | No  | No | No | No | No | Yes | No |
| 56996  | SLC12A9    | solute carrier family 12 (potassium/chloride transporters), member 9                                         | 0.0511531 | Yes | No  | No | No | No | No | No  | No |
| 1009   | CDH11      | cadherin 11, type 2, OB-cadherin (osteoblast)                                                                | 0.0513886 | Yes | No  | No | No | No | No | No  | No |
| 8817   | FGF18      | fibroblast growth factor 18                                                                                  | 0.0514591 | Yes | No  | No | No | No | No | No  | No |
| 64645  | HIAT1      | hippocampus abundant transcript 1                                                                            | 0.0515259 | Yes | Yes | No | No | No | No | Yes | No |
| 155465 | AGR3       | anterior gradient homolog 3 (Xenopus laevis)                                                                 | 0.0516546 | Yes | No  | No | No | No | No | No  | No |
| 54442  | KCTD5      | potassium channel tetramerisation domain containing 5                                                        | 0.0516578 | Yes | No  | No | No | No | No | No  | No |
| 5822   | PWP2       | PWP2 periodic tryptophan protein homolog (yeast)                                                             | 0.051682  | Yes | No  | No | No | No | No | No  | No |
| 10087  | COL4A3BP   | collagen, type IV, alpha 3 (Goodpasture antigen) binding protein                                             | 0.0517129 | No  | No  | No | No | No | No | Yes | No |
| 9260   | PDLIM7     | PDZ and LIM domain 7 (enigma)                                                                                | 0.0517205 | Yes | No  | No | No | No | No | No  | No |
| 54988  | ACSM5      | acyl-CoA synthetase medium-chain family member 5                                                             | 0.0517604 | Yes | No  | No | No | No | No | No  | No |
| 54413  | NLGN3      | neuroligin 3                                                                                                 | 0.0518204 | Yes | No  | No | No | No | No | No  | No |
| 84272  | YIPF4      | Yip1 domain family, member 4                                                                                 | 0.0519115 | No  | No  | No | No | No | No | Yes | No |
| 2903   | GRIN2A     | glutamate receptor, ionotropic, N-methyl D-aspartate 2A                                                      | 0.0520274 | Yes | No  | No | No | No | No | No  | No |
| 64108  | RTP4       | receptor (chemosensory) transporter protein 4                                                                | 0.0520658 | Yes | No  | No | No | No | No | No  | No |
| 712    | C1QA       | complement component 1, q subcomponent, A chain                                                              | 0.0522022 | Yes | No  | No | No | No | No | No  | No |
| 5906   | RAP1A      | RAP1A, member of RAS oncogene family                                                                         | 0.0522986 | Yes | No  | No | No | No | No | No  | No |
| 387990 | UNC9438    | TIMM9                                                                                                        | 0.0524448 | Yes | No  | No | No | No | No | No  | No |
| 51172  | NAGPA      | N-acetylglucosamine-1-phosphodiester alpha-N-acetylglucosaminidase                                           | 0.0524497 | Yes | No  | No | No | No | No | No  | No |
| 5277   | PIGA       | phosphatidylinositol glycan anchor biosynthesis, class A (paroxysmal nocturnal hemoglobinuria)               | 0.052507  | Yes | No  | No | No | No | No | No  | No |
| 57511  | COG6       | component of oligomeric golgi complex 6                                                                      | 0.0526751 | Yes | No  | No | No | No | No | No  | No |
| 8048   | CSRP3      | cysteine and glycine-rich protein 3 (cardiac LIM protein)                                                    | 0.0528131 | Yes | No  | No | No | No | No | No  | No |

|        |           |                                                                              |           |     |     |    |    |    |     |    |    |
|--------|-----------|------------------------------------------------------------------------------|-----------|-----|-----|----|----|----|-----|----|----|
| 55342  | STRBP     | spermatid perinuclear RNA binding protein                                    | 0.0528216 | Yes | No  | No | No | No | No  | No | No |
| 7695   | ZNF136    | zinc finger protein 136                                                      | 0.0529509 | Yes | No  | No | No | No | No  | No | No |
| 1573   | CYP2J2    | cytochrome P450, family 2, subfamily J, polypeptide 2                        | 0.0537905 | Yes | No  | No | No | No | No  | No | No |
| 5408   | PNLIPRP2  | pancreatic lipase-related protein 2                                          | 0.053793  | Yes | No  | No | No | No | No  | No | No |
| 50840  | TAS2R14   | taste receptor, type 2, member 14                                            | 0.0539106 | No  | No  | No | No | No | Yes | No | No |
| 4134   | MAP4      | microtubule-associated protein 4                                             | 0.0539696 | Yes | No  | No | No | No | No  | No | No |
| 5813   | PURA      | purine-rich element binding protein A                                        | 0.0540858 | No  | Yes | No | No | No | No  | No | No |
| 340526 | RGAG4     | retrotransposon gag domain containing 4                                      | 0.0541565 | Yes | No  | No | No | No | No  | No | No |
| 8897   | MTMR3     | myotubularin related protein 3                                               | 0.0544323 | Yes | No  | No | No | No | No  | No | No |
| 57614  | KIAA1468  | KIAA1468                                                                     | 0.0545396 | Yes | No  | No | No | No | No  | No | No |
| 3001   | GZMA      | granzyme A (granzyme 1, cytotoxic T-lymphocyte-associated serine esterase 3) | 0.0547718 | Yes | No  | No | No | No | No  | No | No |
| 255626 | HIST1H2BA | histone cluster 1, H2ba                                                      | 0.0548617 | Yes | No  | No | No | No | No  | No | No |
| 144195 | SLC2A14   | solute carrier family 2 (facilitated glucose transporter), member 14         | 0.0549557 | Yes | No  | No | No | No | No  | No | No |
| 27254  | CSDC2     | cold shock domain containing C2, RNA binding                                 | 0.0550173 | Yes | No  | No | No | No | No  | No | No |
| 26297  | SERGEF    | secretion regulating guanine nucleotide exchange factor                      | 0.0551477 | Yes | No  | No | No | No | No  | No | No |
| 10529  | NEBL      | nebulette                                                                    | 0.0552848 | Yes | No  | No | No | No | No  | No | No |
| 6524   | SLC5A2    | solute carrier family 5 (sodium/glucose cotransporter), member 2             | 0.0558198 | No  | Yes | No | No | No | No  | No | No |
| 1460   | CSNK2B    | casein kinase 2, beta polypeptide                                            | 0.0559576 | Yes | No  | No | No | No | No  | No | No |
| 9563   | H6PD      | hexose-6-phosphate dehydrogenase (glucose 1-dehydrogenase)                   | 0.0559729 | Yes | No  | No | No | No | No  | No | No |
| 55108  | BSDC1     | BSD domain containing 1                                                      | 0.0561576 | Yes | No  | No | No | No | No  | No | No |
| 7169   | TPM2      | tropomyosin 2 (beta)                                                         | 0.0563589 | Yes | No  | No | No | No | No  | No | No |
| 2213   | FCGR2B    | Fc fragment of IgG, low affinity IIb, receptor (CD32)                        | 0.0572189 | Yes | No  | No | No | No | No  | No | No |
| 26150  | RIBC2     | RIB43A domain with coiled-coils 2                                            | 0.0572922 | Yes | No  | No | No | No | Yes | No | No |
| 197    | AHSG      | alpha-2-HS-glycoprotein                                                      | 0.0574202 | Yes | No  | No | No | No | No  | No | No |
| 824    | CAPN2     | calpain 2, (mII) large subunit                                               | 0.0575802 | Yes | No  | No | No | No | No  | No | No |
| 55225  | RAVER2    | ribonucleoprotein, PTB-binding 2                                             | 0.0580786 | Yes | No  | No | No | No | No  | No | No |
| 23646  | PLD3      | phospholipase D family, member 3                                             | 0.0581849 | Yes | No  | No | No | No | No  | No | No |
| 3995   | FADS3     | fatty acid desaturase 3                                                      | 0.0583299 | Yes | No  | No | No | No | No  | No | No |
| 56136  | PCDHA13   | protocadherin alpha 13                                                       | 0.0584922 | Yes | No  | No | No | No | No  | No | No |
| 11162  | NUDT6     | nudix (nucleoside diphosphate linked moiety X)-type motif 6                  | 0.0586669 | No  | No  | No | No | No | Yes | No | No |
| 152137 | CCDC50    | coiled-coil domain containing 50                                             | 0.0586923 | Yes | Yes | No | No | No | No  | No | No |
| 60489  | APOBEC3G  | apolipoprotein B mRNA editing enzyme, catalytic polypeptide-like 3G          | 0.0587476 | Yes | No  | No | No | No | No  | No | No |
| 54552  | GNL3L     | guanine nucleotide binding protein-like 3 (nucleolar)-like                   | 0.0587779 | No  | No  | No | No | No | Yes | No | No |
| 2147   | F2        | coagulation factor II (thrombin)                                             | 0.0588725 | Yes | No  | No | No | No | Yes | No | No |



|        |            |                                                                                                               |           |     |     |    |    |    |    |     |    |
|--------|------------|---------------------------------------------------------------------------------------------------------------|-----------|-----|-----|----|----|----|----|-----|----|
| 2827   | GPR3       | G protein-coupled receptor 3                                                                                  | 0.0588775 | Yes | No  | No | No | No | No | Yes | No |
| 11179  | ZNF277     | zinc finger protein 277                                                                                       | 0.0588881 | Yes | No  | No | No | No | No | No  | No |
| 374403 | TBC1D10C   | TBC1 domain family, member 10C                                                                                | 0.0593398 | Yes | No  | No | No | No | No | No  | No |
| 57148  | KIAA1219   | KIAA1219                                                                                                      | 0.059409  | Yes | No  | No | No | No | No | No  | No |
| 5563   | PRKAA2     | protein kinase, AMP-activated, alpha 2 catalytic subunit                                                      | 0.0596169 | Yes | No  | No | No | No | No | No  | No |
| 51384  | WNT16      | wingless-type MMTV integration site family, member 16                                                         | 0.0597415 | Yes | No  | No | No | No | No | No  | No |
| 2268   | FGR        | Gardner-Rasheed feline sarcoma viral (v-fgr) oncogene homolog                                                 | 0.0600768 | Yes | No  | No | No | No | No | No  | No |
| 466    | ATF1       | activating transcription factor 1                                                                             | 0.0602133 | Yes | No  | No | No | No | No | No  | No |
| 30008  | EFEMP2     | EGF-containing fibulin-like extracellular matrix protein 2                                                    | 0.0602854 | Yes | No  | No | No | No | No | No  | No |
| 10410  | IFITM3     | interferon induced transmembrane protein 3 (1-8U)                                                             | 0.0606595 | Yes | No  | No | No | No | No | No  | No |
| 7727   | ZNF174     | zinc finger protein 174                                                                                       | 0.0607443 | Yes | No  | No | No | No | No | No  | No |
| 51704  | GPRC5B     | G protein-coupled receptor, family C, group 5, member B                                                       | 0.0608535 | Yes | No  | No | No | No | No | No  | No |
| 30001  | ERO1L      | ERO1-like (S. cerevisiae)                                                                                     | 0.0608851 | Yes | No  | No | No | No | No | No  | No |
| 53827  | FXYS       | FXYS domain containing ion transport regulator 5                                                              | 0.0610763 | Yes | No  | No | No | No | No | No  | No |
| 10809  | STARD10    | SIAR-related lipid transfer (START) domain containing 10                                                      | 0.0614087 | Yes | No  | No | No | No | No | No  | No |
| 51086  | TNN3K      | TNN3 interacting kinase                                                                                       | 0.0614462 | No  | No  | No | No | No | No | Yes | No |
| 11255  | HRH3       | histamine receptor H3                                                                                         | 0.061456  | Yes | No  | No | No | No | No | No  | No |
| 4499   | MT1M       | metallothionein 1M                                                                                            | 0.0616553 | Yes | No  | No | No | No | No | No  | No |
| 27090  | ST6GALNAC4 | ST6 (alpha-N-acetyl-neuraminyl-2,3-beta-galactosyl-1,3)-N-acetylgalactosaminide alpha-2,6-sialyltransferase 4 | 0.0616902 | Yes | Yes | No | No | No | No | No  | No |
| 6275   | S100A4     | S100 calcium binding protein A4                                                                               | 0.0619209 | Yes | No  | No | No | No | No | No  | No |
| 55716  | LMBR1L     | limb region 1 homolog (mouse)-like                                                                            | 0.0621195 | Yes | No  | No | No | No | No | No  | No |
| 1943   | EFNA2      | ephrin-A2                                                                                                     | 0.0622393 | Yes | No  | No | No | No | No | No  | No |
| 5921   | RASA1      | RAS p21 protein activator (GTPase activating protein) 1                                                       | 0.0623605 | Yes | No  | No | No | No | No | No  | No |
| 84818  | IL17RC     | interleukin 17 receptor C                                                                                     | 0.062693  | Yes | No  | No | No | No | No | No  | No |
| 5083   | PAX9       | paired box 9                                                                                                  | 0.0633165 | No  | Yes | No | No | No | No | No  | No |
| 8797   | TNFRSF10A  | tumor necrosis factor receptor superfamily, member 10a                                                        | 0.0635207 | Yes | No  | No | No | No | No | No  | No |
| 8303   | SNN        | stannin                                                                                                       | 0.0636419 | Yes | No  | No | No | No | No | No  | No |
| 4016   | LOXL1      | lysyl oxidase-like 1                                                                                          | 0.0636442 | Yes | No  | No | No | No | No | No  | No |
| 6375   | XCL1       | chemokine (C motif) ligand 1                                                                                  | 0.0636991 | Yes | No  | No | No | No | No | No  | No |
| 10270  | AKAP8      | A kinase (PRKA) anchor protein 8                                                                              | 0.0643083 | Yes | No  | No | No | No | No | No  | No |
| 84957  | RELT       | RELT tumor necrosis factor receptor                                                                           | 0.0645024 | Yes | No  | No | No | No | No | No  | No |
| 54463  | FAM134B    | family with sequence similarity 134, member B                                                                 | 0.0645676 | Yes | No  | No | No | No | No | No  | No |
| 84634  | KISS1R     | KISS1 receptor                                                                                                | 0.0646088 | Yes | No  | No | No | No | No | No  | No |
| 55970  | GNG12      | guanine nucleotide binding protein (G protein), gamma 12                                                      | 0.0647874 | Yes | No  | No | No | No | No | No  | No |

|        |          |                                                                                                                 |           |     |     |    |    |    |    |     |    |
|--------|----------|-----------------------------------------------------------------------------------------------------------------|-----------|-----|-----|----|----|----|----|-----|----|
| 4917   | NTN2L    | netrin 2-like (chicken)                                                                                         | 0.0648891 | No  | No  | No | No | No | No | Yes | No |
| 9578   | CDC42BPB | CDC42 binding protein kinase beta (DMPK-like)                                                                   | 0.0649649 | Yes | No  | No | No | No | No | No  | No |
| 89884  | LHX4     | LIM homeobox 4                                                                                                  | 0.0650109 | Yes | No  | No | No | No | No | No  | No |
| 845    | CASQ2    | calsequestrin 2 (cardiac muscle)                                                                                | 0.0651531 | Yes | No  | No | No | No | No | No  | No |
| 5446   | PON3     | paraoxonase 3                                                                                                   | 0.0653298 | Yes | No  | No | No | No | No | No  | No |
| 2833   | CXCR3    | chemokine (C-X-C motif) receptor 3                                                                              | 0.0653359 | Yes | No  | No | No | No | No | No  | No |
| 6710   | SPTB     | spectrin, beta, erythrocytic (includes spherocytosis, clinical type I)                                          | 0.0653356 | Yes | No  | No | No | No | No | No  | No |
| 6928   | HNF1B    | HNF1 homeobox B                                                                                                 | 0.065374  | Yes | No  | No | No | No | No | No  | No |
| 9603   | NFE2L3   | nuclear factor (erythroid-derived 2)-like 3                                                                     | 0.0655405 | Yes | No  | No | No | No | No | No  | No |
| 11119  | BTN3A1   | butyrophilin, subfamily 3, member A1                                                                            | 0.0655459 | Yes | No  | No | No | No | No | No  | No |
| 10864  | SLC22A7  | solute carrier family 22 (organic anion transporter), member 7                                                  | 0.0656672 | Yes | No  | No | No | No | No | No  | No |
| 4985   | OPRD1    | opioid receptor, delta 1                                                                                        | 0.0657717 | Yes | No  | No | No | No | No | No  | No |
| 131870 | NUDT16   | nudix (nucleoside diphosphate linked moiety X)-type motif 16                                                    | 0.066004  | Yes | No  | No | No | No | No | No  | No |
| 9901   | SRGAP3   | SLIT-ROBO Rho GTPase activating protein 3                                                                       | 0.0662823 | Yes | No  | No | No | No | No | No  | No |
| 83696  | NIBP     | trafficking protein particle complex 9                                                                          | 0.0665698 | Yes | No  | No | No | No | No | No  | No |
| 54438  | GFOD1    | glucose-fructose oxidoreductase domain containing 1                                                             | 0.0669845 | No  | No  | No | No | No | No | Yes | No |
| 7475   | WNT6     | wingless-type MMTV integration site family, member 6                                                            | 0.0670396 | Yes | No  | No | No | No | No | No  | No |
| 23443  | SLC35A3  | solute carrier family 35 (UDP-N-acetylglucosamine (UDP-GlcNAc) transporter), member A3                          | 0.0672077 | Yes | No  | No | No | No | No | No  | No |
| 63827  | BCAN     | brevican                                                                                                        | 0.0676821 | Yes | No  | No | No | No | No | No  | No |
| 26155  | NOC2L    | nucleolar complex associated 2 homolog (S. cerevisiae)                                                          | 0.0677584 | Yes | No  | No | No | No | No | No  | No |
| 140807 | KRT72    | keratin 72                                                                                                      | 0.0678718 | Yes | No  | No | No | No | No | No  | No |
| 56916  | SMARCAD1 | SWI/SNF-related, matrix-associated actin-dependent regulator of chromatin, subfamily a, containing DEAD/H box 1 | 0.0686204 | No  | No  | No | No | No | No | Yes | No |
| 83666  | PARP9    | poly (ADP-ribose) polymerase family, member 9                                                                   | 0.0686909 | Yes | Yes | No | No | No | No | No  | No |
| 121665 | UNQ1887  | signal peptide peptidase 3                                                                                      | 0.0688252 | Yes | No  | No | No | No | No | No  | No |
| 91768  | CABLES1  | Cdk5 and Abl enzyme substrate 1                                                                                 | 0.0688402 | Yes | No  | No | No | No | No | No  | No |
| 80011  | NIP30    | NEFA-interacting nuclear protein NIP30                                                                          | 0.0692129 | No  | No  | No | No | No | No | Yes | No |
| 9940   | DLEC1    | deleted in lung and esophageal cancer 1                                                                         | 0.0693618 | Yes | No  | No | No | No | No | No  | No |
| 5834   | PYGB     | phosphorylase, glycogen; brain                                                                                  | 0.0693746 | Yes | No  | No | No | No | No | Yes | No |
| 23002  | DAAM1    | dishevelled associated activator of morphogenesis 1                                                             | 0.0694186 | No  | Yes | No | No | No | No | No  | No |
| 149628 | PYHIN1   | pyrin and HIN domain family, member 1                                                                           | 0.0695031 | Yes | No  | No | No | No | No | No  | No |
| 9537   | TP53I11  | tumor protein p53 inducible protein 11                                                                          | 0.0695701 | Yes | No  | No | No | No | No | No  | No |
| 909    | CD1A     | CD1a molecule                                                                                                   | 0.0697577 | Yes | No  | No | No | No | No | No  | No |
| 9811   | KIAA0427 | KIAA0427                                                                                                        | 0.0698443 | Yes | No  | No | No | No | No | No  | No |
| 27236  | ARFIP1   | ADP-ribosylation factor interacting protein 1 (arfaptin 1)                                                      | 0.069905  | Yes | No  | No | No | No | No | No  | No |

|        |          |                                                                                |           |     |     |    |    |    |     |    |    |
|--------|----------|--------------------------------------------------------------------------------|-----------|-----|-----|----|----|----|-----|----|----|
| 79364  | ZXDC     | ZXD family zinc finger C                                                       | 0.0704739 | Yes | No  | No | No | No | No  | No | No |
| 28982  | FLVCR1   | feline leukemia virus subgroup C cellular receptor 1                           | 0.0705841 | Yes | No  | No | No | No | No  | No | No |
| 144608 | C12orf60 | chromosome 12 open reading frame 60                                            | 0.0706104 | No  | No  | No | No | No | Yes | No | No |
| 54578  | UGT1A6   | UDP glucuronosyltransferase 1 family, polypeptide A6                           | 0.0707114 | Yes | No  | No | No | No | No  | No | No |
| 112483 | SAT2     | spermidine/spermine N1-acetyltransferase family member 2                       | 0.0714625 | Yes | No  | No | No | No | No  | No | No |
| 776    | CACNA1D  | calcium channel, voltage-dependent, L type, alpha 1D subunit                   | 0.0719388 | Yes | No  | No | No | No | No  | No | No |
| 23263  | MCF2L    | MCF.2 cell line derived transforming sequence-like                             | 0.0719639 | Yes | No  | No | No | No | No  | No | No |
| 116985 | CENTD2   | centaurin, delta 2                                                             | 0.0722975 | Yes | No  | No | No | No | No  | No | No |
| 2863   | GPR39    | G protein-coupled receptor 39                                                  | 0.0724092 | Yes | No  | No | No | No | No  | No | No |
| 10791  | VAMP5    | vesicle-associated membrane protein 5 (myobrevin)                              | 0.0726472 | Yes | No  | No | No | No | No  | No | No |
| 3047   | HGB1     | hemoglobin, gamma A                                                            | 0.0728207 | Yes | No  | No | No | No | No  | No | No |
| 80108  | ZFP2     | zinc finger protein 2 homolog (mouse)                                          | 0.0728486 | Yes | No  | No | No | No | No  | No | No |
| 57154  | SMURF1   | SMAD specific E3 ubiquitin protein ligase 1                                    | 0.0730511 | Yes | Yes | No | No | No | No  | No | No |
| 658    | BMPR1B   | bone morphogenetic protein receptor, type IB                                   | 0.0737121 | Yes | No  | No | No | No | No  | No | No |
| 1428   | CRYM     | crystallin, mu                                                                 | 0.0741524 | No  | No  | No | No | No | Yes | No | No |
| 81926  | FAM108A1 | family with sequence similarity 108, member A1                                 | 0.0741916 | Yes | No  | No | No | No | No  | No | No |
| 89894  | TMEM116  | transmembrane protein 116                                                      | 0.0742366 | No  | No  | No | No | No | Yes | No | No |
| 1291   | COL6A1   | collagen, type VI, alpha 1                                                     | 0.0742894 | Yes | No  | No | No | No | No  | No | No |
| 81618  | ITM2C    | integral membrane protein 2C                                                   | 0.0744612 | Yes | No  | No | No | No | No  | No | No |
| 7145   | TNS1     | tensin 1                                                                       | 0.0750304 | Yes | No  | No | No | No | No  | No | No |
| 8480   | RAE1     | RAE1 RNA export 1 homolog (S. pombe)                                           | 0.0752428 | Yes | No  | No | No | No | No  | No | No |
| 2066   | ERBB4    | v-erb-a erythroblastic leukemia viral oncogene homolog 4 (avian)               | 0.0754225 | Yes | No  | No | No | No | No  | No | No |
| 89890  | KBTBD6   | kelch repeat and BTB (POZ) domain containing 6                                 | 0.0754383 | Yes | No  | No | No | No | No  | No | No |
| 80256  | KIAA1539 | KIAA1539                                                                       | 0.0756335 | Yes | No  | No | No | No | No  | No | No |
| 1297   | COL9A1   | collagen, type IX, alpha 1                                                     | 0.075891  | Yes | No  | No | No | No | No  | No | No |
| 80028  | FBXL18   | F-box and leucine-rich repeat protein 18                                       | 0.0759873 | Yes | No  | No | No | No | No  | No | No |
| 9655   | SOCS5    | suppressor of cytokine signaling 5                                             | 0.0765357 | Yes | Yes | No | No | No | No  | No | No |
| 5865   | RAB3B    | RAB3B, member RAS oncogene family                                              | 0.0768304 | Yes | No  | No | No | No | No  | No | No |
| 2077   | ERF      | Ets2 repressor factor                                                          | 0.0769097 | Yes | No  | No | No | No | No  | No | No |
| 57190  | SEPN1    | selenoprotein N, 1                                                             | 0.0769927 | Yes | No  | No | No | No | No  | No | No |
| 222894 | FERD3L   | Fer3-like (Drosophila)                                                         | 0.0776575 | No  | Yes | No | No | No | No  | No | No |
| 7289   | TULP3    | tubby like protein 3                                                           | 0.077723  | Yes | No  | No | No | No | No  | No | No |
| 6764   | ST5      | suppression of tumorigenicity 5                                                | 0.0781418 | No  | No  | No | No | No | Yes | No | No |
| 3700   | ITI4     | inter-alpha (globulin) inhibitor H4 (plasma Kallikrein-sensitive glycoprotein) | 0.0781808 | Yes | No  | No | No | No | No  | No | No |

|        |           |                                                                          |           |     |     |    |    |    |     |    |    |
|--------|-----------|--------------------------------------------------------------------------|-----------|-----|-----|----|----|----|-----|----|----|
| 23302  | WSCD1     | WSC domain containing 1                                                  | 0.0784781 | Yes | No  | No | No | No | No  | No | No |
| 55728  | N4BP2     | NEDD4 binding protein 2                                                  | 0.0789589 | No  | No  | No | No | No | Yes | No | No |
| 10437  | IFI30     | interferon, gamma-inducible protein 30                                   | 0.0792864 | Yes | No  | No | No | No | No  | No | No |
| 147699 | FLJ40125  | hypothetical protein FLJ40125                                            | 0.0794256 | Yes | No  | No | No | No | No  | No | No |
| 9093   | DNAJA3    | DnaJ (Hsp40) homolog, subfamily A, member 3                              | 0.0795041 | No  | No  | No | No | No | Yes | No | No |
| 55080  | TAPBPL    | TAP binding protein-like                                                 | 0.0795947 | Yes | No  | No | No | No | No  | No | No |
| 56995  | TULP4     | tubby like protein 4                                                     | 0.0799447 | Yes | No  | No | No | No | No  | No | No |
| 55278  | QRSL1     | glutamyl-tRNA synthase (glutamine-hydrolyzing)-like 1                    | 0.0799731 | Yes | No  | No | No | No | No  | No | No |
| 79009  | DDX50     | DEAD (Asp-Glu-Ala-Asp) box polypeptide 50                                | 0.0801383 | Yes | No  | No | No | No | No  | No | No |
| 5800   | PTPRO     | protein tyrosine phosphatase, receptor type, O                           | 0.0802882 | Yes | No  | No | No | No | No  | No | No |
| 30817  | EMR2      | egf-like module containing, mucin-like, hormone receptor-like 2          | 0.0805861 | Yes | No  | No | No | No | No  | No | No |
| 54795  | TRPM4     | transient receptor potential cation channel, subfamily M, member 4       | 0.0807671 | Yes | No  | No | No | No | No  | No | No |
| 2048   | EPHB2     | EPH receptor B2                                                          | 0.0808182 | Yes | No  | No | No | No | No  | No | No |
| 64843  | ISL2      | ISL LIM homeobox 2                                                       | 0.0809168 | No  | No  | No | No | No | Yes | No | No |
| 10468  | FST       | folistatin                                                               | 0.0810373 | Yes | No  | No | No | No | No  | No | No |
| 54841  | BIVM      | basic, immunoglobulin-like variable motif containing                     | 0.0811242 | No  | No  | No | No | No | Yes | No | No |
| 6563   | SLC14A1   | solute carrier family 14 (urea transporter), member 1 (Kidd blood group) | 0.0814339 | Yes | No  | No | No | No | No  | No | No |
| 165829 | GPR156    | G protein-coupled receptor 156                                           | 0.0815079 | Yes | No  | No | No | No | No  | No | No |
| 153364 | LOC153364 | similar to metallo-beta-lactamase superfamily protein                    | 0.0815449 | Yes | Yes | No | No | No | No  | No | No |
| 6809   | STX3      | syntaxin 3                                                               | 0.0815513 | Yes | No  | No | No | No | No  | No | No |
| 5863   | RGL2      | ral guanine nucleotide dissociation stimulator-like 2                    | 0.0820962 | Yes | No  | No | No | No | No  | No | No |
| 401190 | RGS7BP    | regulator of G-protein signaling 7 binding protein                       | 0.0821988 | Yes | No  | No | No | No | No  | No | No |
| 25850  | ZNF345    | zinc finger protein 345                                                  | 0.0822193 | Yes | No  | No | No | No | No  | No | No |
| 252995 | FNDC5     | fibronectin type III domain containing 5                                 | 0.08242   | Yes | No  | No | No | No | No  | No | No |
| 4345   | CD200     | CD200 molecule                                                           | 0.0831963 | Yes | No  | No | No | No | No  | No | No |
| 5959   | RDH5      | retinol dehydrogenase 5 (11-cis/9-cis)                                   | 0.0832006 | Yes | No  | No | No | No | No  | No | No |
| 1384   | CRAT      | carnitine acetyltransferase                                              | 0.0839962 | Yes | No  | No | No | No | No  | No | No |
| 23583  | SMUG1     | single-strand-selective monofunctional uracil-DNA glycosylase 1          | 0.0844364 | Yes | No  | No | No | No | No  | No | No |
| 27185  | DISC1     | disrupted in schizophrenia 1                                             | 0.0848526 | Yes | No  | No | No | No | No  | No | No |
| 29948  | OSGIN1    | oxidative stress inducible growth inhibitor 1                            | 0.0848604 | Yes | No  | No | No | No | No  | No | No |
| 1030   | CDKN2B    | cyclin-dependent kinase inhibitor 2B (p15, inhibits CDK4)                | 0.0848946 | Yes | No  | No | No | No | No  | No | No |
| 8537   | BCAS1     | breast carcinoma amplified sequence 1                                    | 0.0852234 | Yes | No  | No | No | No | No  | No | No |
| 661    | POLR3D    | polymerase (RNA) III (DNA directed) polypeptide D, 44kDa                 | 0.0859152 | Yes | No  | No | No | No | No  | No | No |
| 1723   | DHODH     | dihydroorotate dehydrogenase                                             | 0.0860241 | Yes | Yes | No | No | No | No  | No | No |

|        |          |                                                                    |           |     |     |    |    |    |     |    |    |
|--------|----------|--------------------------------------------------------------------|-----------|-----|-----|----|----|----|-----|----|----|
| 587    | BCAT2    | branched chain aminotransferase 2, mitochondrial                   | 0.0863518 | Yes | No  | No | No | No | No  | No | No |
| 55515  | ACCN4    | amiloride-sensitive cation channel 4, pituitary                    | 0.0866661 | Yes | No  | No | No | No | No  | No | No |
| 273    | AMPH     | amphiphysin                                                        | 0.0868648 | Yes | No  | No | No | No | No  | No | No |
| 54834  | GDAP2    | ganglioside induced differentiation associated protein 2           | 0.0870394 | Yes | No  | No | No | No | Yes | No | No |
| 50856  | CLECA4   | C-type lectin domain family 4, member A                            | 0.0872665 | Yes | No  | No | No | No | No  | No | No |
| 3338   | DNAJC4   | DnaJ (Hsp40) homolog, subfamily C, member 4                        | 0.0873096 | Yes | No  | No | No | No | No  | No | No |
| 254394 | MCM9     | minichromosome maintenance complex component 9                     | 0.0874537 | Yes | No  | No | No | No | No  | No | No |
| 60482  | SLCSA7   | solute carrier family 5 (choline transporter), member 7            | 0.0876068 | Yes | No  | No | No | No | No  | No | No |
| 93129  | ORAI3    | ORAI calcium release-activated calcium modulator 3                 | 0.0876336 | Yes | No  | No | No | No | No  | No | No |
| 64127  | NOD2     | nucleotide-binding oligomerization domain containing 2             | 0.0880139 | Yes | Yes | No | No | No | No  | No | No |
| 8989   | TRPA1    | transient receptor potential cation channel, subfamily A, member 1 | 0.0885532 | Yes | Yes | No | No | No | No  | No | No |
| 4088   | SMAD3    | SMAD family member 3                                               | 0.0887686 | Yes | No  | No | No | No | No  | No | No |
| 976    | CD97     | CD97 molecule                                                      | 0.0894494 | Yes | No  | No | No | No | No  | No | No |
| 9973   | CCS      | copper chaperone for superoxide dismutase                          | 0.089513  | Yes | No  | No | No | No | Yes | No | No |
| 9436   | NCR2     | natural cytotoxicity triggering receptor 2                         | 0.089998  | Yes | No  | No | No | No | No  | No | No |
| 5125   | PCSK5    | proprotein convertase subtilisin/kexin type 5                      | 0.0902034 | Yes | No  | No | No | No | No  | No | No |
| 143458 | LDLRAD3  | low density lipoprotein receptor class A domain containing 3       | 0.0903843 | Yes | No  | No | No | No | No  | No | No |
| 2247   | FGF2     | fibroblast growth factor 2 (basic)                                 | 0.0911175 | Yes | No  | No | No | No | No  | No | No |
| 57153  | SLC44A2  | solute carrier family 44, member 2                                 | 0.0911203 | Yes | No  | No | No | No | No  | No | No |
| 339541 | MGC33556 | hypothetical LOC339541                                             | 0.0911668 | Yes | No  | No | No | No | No  | No | No |
| 126070 | ZNF440   | zinc finger protein 440                                            | 0.0915376 | Yes | No  | No | No | No | No  | No | No |
| 58477  | SRPRB    | signal recognition particle receptor, B subunit                    | 0.0915835 | Yes | Yes | No | No | No | No  | No | No |
| 3303   | HSPA1A   | heat shock 70kDa protein 1A                                        | 0.0916656 | Yes | No  | No | No | No | No  | No | No |
| 23413  | FREQ     | frequenin homolog (Drosophila)                                     | 0.0917092 | Yes | Yes | No | No | No | No  | No | No |
| 4091   | SMAD6    | SMAD family member 6                                               | 0.0920089 | No  | No  | No | No | No | Yes | No | No |
| 6328   | SCN3A    | sodium channel, voltage-gated, type III, alpha subunit             | 0.0920822 | Yes | No  | No | No | No | No  | No | No |
| 79148  | MMP28    | matrix metalloproteinase 28                                        | 0.0921066 | Yes | No  | No | No | No | No  | No | No |
| 327    | APEH     | N-acylaminoacyl-peptide hydrolase                                  | 0.092176  | No  | Yes | No | No | No | No  | No | No |
| 10073  | SNUPN    | snurportin 1                                                       | 0.0925375 | No  | No  | No | No | No | Yes | No | No |
| 51277  | RBJ      | rab and DnaJ domain containing                                     | 0.0931303 | No  | No  | No | No | No | Yes | No | No |
| 3955   | LFNG     | LFNG O-fucosylpeptide 3-beta-N-acetylglucosaminyltransferase       | 0.0937233 | Yes | No  | No | No | No | No  | No | No |
| 1387   | CREBBP   | CREB binding protein (Rubinstein-Taybi syndrome)                   | 0.0939399 | Yes | No  | No | No | No | No  | No | No |
| 56131  | PCDHB4   | protocadherin beta 4                                               | 0.093989  | Yes | No  | No | No | No | No  | No | No |
| 10379  | IRF9     | interferon regulatory factor 9                                     | 0.0940624 | Yes | No  | No | No | No | No  | No | No |

|        |          |                                                                                                                 |           |     |     |    |    |    |    |     |    |
|--------|----------|-----------------------------------------------------------------------------------------------------------------|-----------|-----|-----|----|----|----|----|-----|----|
| 55679  | LIMS2    | LIM and senescent cell antigen-like domains 2                                                                   | 0.0941729 | Yes | No  | No | No | No | No | No  | No |
| 25875  | LETMD1   | LETM1 domain containing 1                                                                                       | 0.0942162 | No  | No  | No | No | No | No | Yes | No |
| 65975  | STK33    | serine/threonine kinase 33                                                                                      | 0.0944291 | Yes | No  | No | No | No | No | No  | No |
| 8815   | BANF1    | barrier to autointegration factor 1                                                                             | 0.0944519 | No  | No  | No | No | No | No | Yes | No |
| 1161   | ERCC8    | excision repair cross-complementing rodent repair deficiency, complementation group 8                           | 0.0945063 | No  | No  | No | No | No | No | Yes | No |
| 9466   | IL27RA   | interleukin 27 receptor, alpha                                                                                  | 0.0946359 | Yes | No  | No | No | No | No | No  | No |
| 117579 | RLN3     | relaxin 3                                                                                                       | 0.0950018 | Yes | No  | No | No | No | No | No  | No |
| 51635  | DHRS7    | dehydrogenase/reductase (SDR family) member 7                                                                   | 0.0954689 | Yes | No  | No | No | No | No | No  | No |
| 28992  | MACROD1  | MACRO domain containing 1                                                                                       | 0.0958799 | Yes | No  | No | No | No | No | No  | No |
| 9022   | CLIC3    | chloride intracellular channel 3                                                                                | 0.0959212 | Yes | No  | No | No | No | No | No  | No |
| 118460 | EXOSC6   | exosome component 6                                                                                             | 0.0959403 | No  | No  | No | No | No | No | Yes | No |
| 54739  | XAF1     | XIAP associated factor 1                                                                                        | 0.0961636 | Yes | No  | No | No | No | No | No  | No |
| 2671   | GFER     | growth factor, augmentor of liver regeneration (ERV1 homolog, <i>S. cerevisiae</i> )                            | 0.0964394 | Yes | No  | No | No | No | No | No  | No |
| 126382 | NR2C2AP  | nuclear receptor 2C2-associated protein                                                                         | 0.0964395 | Yes | No  | No | No | No | No | No  | No |
| 5396   | PRRX1    | paired related homeobox 1                                                                                       | 0.0965899 | Yes | No  | No | No | No | No | No  | No |
| 117854 | TRIM6    | tripartite motif-containing 6                                                                                   | 0.0969521 | Yes | Yes | No | No | No | No | No  | No |
| 55691  | FRMD4A   | FERM domain containing 4A                                                                                       | 0.0975746 | Yes | No  | No | No | No | No | No  | No |
| 84836  | ABHD14B  | abhydrolase domain containing 14B                                                                               | 0.0975795 | Yes | No  | No | No | No | No | No  | No |
| 10505  | SEMA4F   | sema domain, immunoglobulin domain (Ig), transmembrane domain (TM) and short cytoplasmic domain (semaphorin) 4F | 0.0977379 | Yes | No  | No | No | No | No | No  | No |
| 7135   | TNNI1    | troponin I type 1 (skeletal, slow)                                                                              | 0.097835  | Yes | No  | No | No | No | No | No  | No |
| 79868  | ALG13    | asparagine-linked glycosylation 13 homolog ( <i>S. cerevisiae</i> )                                             | 0.0994332 | Yes | Yes | No | No | No | No | No  | No |
| 9189   | ZBED1    | zinc finger, BED-type containing 1                                                                              | 0.0994817 | Yes | Yes | No | No | No | No | No  | No |
| 151011 | SEPT10   | septin 10                                                                                                       | 0.0997476 | Yes | No  | No | No | No | No | No  | No |
| 1301   | COL11A1  | collagen, type XI, alpha 1                                                                                      | 0.100268  | Yes | No  | No | No | No | No | No  | No |
| 80031  | SEMA6D   | sema domain, transmembrane domain (TM), and cytoplasmic domain, (semaphorin) 6D                                 | 0.10122   | Yes | No  | No | No | No | No | No  | No |
| 2199   | FBLN2    | fibulin 2                                                                                                       | 0.101532  | Yes | No  | No | No | No | No | No  | No |
| 9622   | KLK4     | kallikrein-related peptidase 4                                                                                  | 0.101647  | Yes | No  | No | No | No | No | No  | No |
| 133522 | PPARGC1B | peroxisome proliferator-activated receptor gamma, coactivator 1 beta                                            | 0.101916  | Yes | No  | No | No | No | No | No  | No |
| 54620  | FBXL19   | F-box and leucine-rich repeat protein 19                                                                        | 0.102123  | No  | No  | No | No | No | No | Yes | No |
| 286629 | SEC14L3  | SEC14-like 3 ( <i>S. cerevisiae</i> )                                                                           | 0.102703  | Yes | No  | No | No | No | No | No  | No |
| 80746  | TSEN2    | tRNA splicing endonuclease 2 homolog ( <i>S. cerevisiae</i> )                                                   | 0.103125  | Yes | No  | No | No | No | No | No  | No |
| 2625   | GATA3    | GATA binding protein 3                                                                                          | 0.103528  | Yes | No  | No | No | No | No | No  | No |
| 9326   | ZNHIT3   | zinc finger, HIT type 3                                                                                         | 0.103702  | No  | No  | No | No | No | No | Yes | No |
| 1815   | DRD4     | dopamine receptor D4                                                                                            | 0.10371   | Yes | No  | No | No | No | No | No  | No |

|        |         |                                                                               |          |     |     |    |    |    |    |     |     |
|--------|---------|-------------------------------------------------------------------------------|----------|-----|-----|----|----|----|----|-----|-----|
| 6572   | SLC18A3 | solute carrier family 18 (vesicular acetylcholine), member 3                  | 0.103743 | Yes | No  | No | No | No | No | No  | No  |
| 9806   | SPOCK2  | sparc/osteonectin, cwcv and kazal-like domains proteoglycan (testican) 2      | 0.103904 | Yes | No  | No | No | No | No | No  | No  |
| 1909   | EDNRA   | endothelin receptor type A                                                    | 0.10419  | Yes | No  | No | No | No | No | No  | No  |
| 164091 | PAQR7   | progesterin and adipoQ receptor family member VII                             | 0.10513  | Yes | Yes | No | No | No | No | No  | No  |
| 84417  | C2orf40 | chromosome 2 open reading frame 40                                            | 0.105335 | Yes | No  | No | No | No | No | No  | No  |
| 284338 | PRR19   | proline rich 19                                                               | 0.106295 | No  | No  | No | No | No | No | Yes | No  |
| 22894  | DIS3    | DIS3 mitotic control homolog (S. cerevisiae)                                  | 0.106364 | Yes | No  | No | No | No | No | Yes | Yes |
| 84524  | ZC3H8   | zinc finger CCCH-type containing 8                                            | 0.106742 | Yes | No  | No | No | No | No | No  | No  |
| 83935  | TMEM133 | transmembrane protein 133                                                     | 0.106847 | Yes | No  | No | No | No | No | No  | No  |
| 146852 | ODF4    | outer dense fiber of sperm tails 4                                            | 0.107384 | Yes | No  | No | No | No | No | No  | No  |
| 8204   | NRIP1   | nuclear receptor interacting protein 1                                        | 0.107976 | Yes | No  | No | No | No | No | No  | No  |
| 10768  | AHCYL1  | S-adenosylhomocysteine hydrolase-like 1                                       | 0.108229 | Yes | No  | No | No | No | No | No  | No  |
| 11277  | TREX1   | three prime repair exonuclease 1                                              | 0.108598 | No  | Yes | No | No | No | No | No  | No  |
| 3199   | HOXA2   | homeobox A2                                                                   | 0.108753 | Yes | No  | No | No | No | No | No  | No  |
| 6583   | SLC22A4 | solute carrier family 22 (organic cation/ergothioneine transporter), member 4 | 0.109034 | No  | No  | No | No | No | No | Yes | No  |
| 23177  | CEP68   | centrosomal protein 68kDa                                                     | 0.109616 | Yes | No  | No | No | No | No | No  | No  |
| 4128   | MAOA    | monoamine oxidase A                                                           | 0.1098   | Yes | No  | No | No | No | No | No  | No  |
| 5624   | POMGNT1 | protein O-linked mannose beta1,2-N-acetylglucosaminyltransferase              | 0.10995  | Yes | No  | No | No | No | No | No  | No  |
| 3656   | IRAK2   | interleukin-1 receptor-associated kinase 2                                    | 0.110398 | Yes | No  | No | No | No | No | No  | No  |
| 115548 | FCHO2   | FCH domain only 2                                                             | 0.110777 | Yes | No  | No | No | No | No | No  | No  |
| 57580  | PREX1   | phosphatidylinositol 3,4,5-trisphosphate-dependent RAC exchanger 1            | 0.111585 | Yes | No  | No | No | No | No | No  | No  |
| 25791  | NGEF    | neuronal guanine nucleotide exchange factor                                   | 0.111795 | Yes | No  | No | No | No | No | No  | No  |
| 7011   | TEP1    | telomerase-associated protein 1                                               | 0.111934 | Yes | No  | No | No | No | No | No  | No  |
| 9465   | AKAP7   | A kinase (PRKA) anchor protein 7                                              | 0.112286 | Yes | No  | No | No | No | No | No  | No  |
| 55314  | TMEM144 | transmembrane protein 144                                                     | 0.112741 | Yes | No  | No | No | No | No | No  | No  |
| 79739  | TTLL7   | tubulin tyrosine ligase-like family, member 7                                 | 0.112949 | Yes | No  | No | No | No | No | No  | No  |
| 287    | ANK2    | ankyrin 2, neuronal                                                           | 0.113346 | Yes | No  | No | No | No | No | No  | No  |
| 4782   | NFIC    | nuclear factor IIC (CCAAT-binding transcription factor)                       | 0.113398 | Yes | No  | No | No | No | No | No  | No  |
| 79618  | HMBOX1  | homeobox containing 1                                                         | 0.113504 | Yes | No  | No | No | No | No | No  | No  |
| 3590   | IL11RA  | interleukin 11 receptor, alpha                                                | 0.113713 | Yes | No  | No | No | No | No | No  | No  |
| 1181   | CLCN2   | chloride channel 2                                                            | 0.114821 | No  | No  | No | No | No | No | Yes | No  |
| 5256   | PHKA2   | phosphorylase kinase, alpha 2 (liver)                                         | 0.115164 | Yes | No  | No | No | No | No | No  | No  |
| 200186 | CRTC2   | CREB regulated transcription coactivator 2                                    | 0.115256 | Yes | No  | No | No | No | No | No  | No  |
| 23286  | WWC1    | WW and C2 domain containing 1                                                 | 0.116828 | Yes | Yes | No | No | No | No | No  | No  |

|        |         |                                                                                                |          |     |     |    |    |    |    |     |     |
|--------|---------|------------------------------------------------------------------------------------------------|----------|-----|-----|----|----|----|----|-----|-----|
| 6440   | SFTPC   | surfactant, pulmonary-associated protein C                                                     | 0.117469 | Yes | No  | No | No | No | No | No  | No  |
| 7581   | ZNF33A  | zinc finger protein 33A                                                                        | 0.117562 | Yes | No  | No | No | No | No | No  | No  |
| 122416 | ANKRD9  | ankyrin repeat domain 9                                                                        | 0.117615 | Yes | No  | No | No | No | No | No  | No  |
| 973    | CD79A   | CD79a molecule, immunoglobulin-associated alpha                                                | 0.119067 | No  | No  | No | No | No | No | Yes | No  |
| 30819  | KCNIP2  | Kv channel interacting protein 2                                                               | 0.119161 | Yes | No  | No | No | No | No | No  | No  |
| 2204   | FCAR    | Fc fragment of IgA, receptor for                                                               | 0.119167 | Yes | No  | No | No | No | No | No  | No  |
| 649    | BMP1    | bone morphogenetic protein 1                                                                   | 0.120091 | Yes | No  | No | No | No | No | No  | No  |
| 23265  | EXOC7   | exocyst complex component 7                                                                    | 0.120256 | Yes | No  | No | No | No | No | No  | No  |
| 6263   | RYR3    | ryanodine receptor 3                                                                           | 0.120412 | Yes | No  | No | No | No | No | No  | No  |
| 65251  | ZNF649  | zinc finger protein 649                                                                        | 0.120476 | Yes | No  | No | No | No | No | No  | No  |
| 3815   | KIT     | v-kit Hardy-Zuckerman 4 feline sarcoma viral oncogene homolog                                  | 0.121637 | Yes | No  | No | No | No | No | No  | No  |
| 2590   | GALNT2  | UDP-N-acetyl-alpha-D-galactosamine:polypeptide N-acetylgalactosaminyltransferase 2 (GalNAc-T2) | 0.12215  | Yes | Yes | No | No | No | No | No  | No  |
| 79814  | AGMAT   | agmatine ureohydrolase (agmatinase)                                                            | 0.122557 | Yes | No  | No | No | No | No | No  | No  |
| 153579 | BTNL9   | butyrophilin-like 9                                                                            | 0.123083 | No  | Yes | No | No | No | No | No  | No  |
| 5321   | PLA2G4A | phospholipase A2, group IVA (cytosolic, calcium-dependent)                                     | 0.123171 | Yes | No  | No | No | No | No | No  | No  |
| 26094  | WDR21A  | WD repeat domain 21A                                                                           | 0.12331  | Yes | No  | No | No | No | No | No  | No  |
| 23272  | C3orf63 | chromosome 3 open reading frame 63                                                             | 0.124328 | Yes | No  | No | No | No | No | No  | No  |
| 3755   | KCNJ1   | potassium voltage-gated channel, subfamily G, member 1                                         | 0.124932 | Yes | No  | No | No | No | No | No  | No  |
| 23762  | OSBP2   | oxysterol binding protein 2                                                                    | 0.126267 | Yes | No  | No | No | No | No | No  | No  |
| 8490   | RGS5    | regulator of G-protein signaling 5                                                             | 0.126508 | No  | Yes | No | No | No | No | No  | No  |
| 55816  | DOK5    | docking protein 5                                                                              | 0.127155 | Yes | No  | No | No | No | No | No  | No  |
| 27342  | RABGEF1 | RAB guanine nucleotide exchange factor (GEF) 1                                                 | 0.128279 | Yes | No  | No | No | No | No | No  | No  |
| 2523   | FUT1    | fucosyltransferase 1 (galactoside 2-alpha-L-fucosyltransferase, H blood group)                 | 0.129577 | Yes | No  | No | No | No | No | No  | No  |
| 653    | BMP5    | bone morphogenetic protein 5                                                                   | 0.129793 | No  | Yes | No | No | No | No | No  | No  |
| 353    | APRT    | adenine phosphoribosyltransferase                                                              | 0.129832 | Yes | No  | No | No | No | No | No  | No  |
| 79152  | FA2H    | fatty acid 2-hydroxylase                                                                       | 0.130063 | Yes | No  | No | No | No | No | No  | No  |
| 139716 | GAB3    | GRB2-associated binding protein 3                                                              | 0.130496 | Yes | No  | No | No | No | No | No  | No  |
| 8985   | PLOD3   | procollagen-lysine, 2-oxoglutarate 5-dioxygenase 3                                             | 0.130595 | Yes | No  | No | No | No | No | Yes | Yes |
| 63934  | ZNF667  | zinc finger protein 667                                                                        | 0.130917 | Yes | No  | No | No | No | No | No  | No  |
| 287015 | TRIM42  | tripartite motif-containing 42                                                                 | 0.130984 | Yes | No  | No | No | No | No | No  | No  |
| 5740   | PTGIS   | prostaglandin I2 (prostacyclin) synthase                                                       | 0.130996 | Yes | No  | No | No | No | No | No  | No  |
| 23533  | PIK3R5  | phosphoinositide-3-kinase, regulatory subunit 5                                                | 0.13187  | Yes | No  | No | No | No | No | No  | No  |
| 54     | ACP5    | acid phosphatase 5, tartrate resistant                                                         | 0.133353 | Yes | Yes | No | No | No | No | No  | No  |
| 149095 | DCST1   | DC-STAMP domain containing 1                                                                   | 0.133448 | Yes | No  | No | No | No | No | No  | No  |



|        |           |                                                               |          |     |     |    |    |    |     |    |    |
|--------|-----------|---------------------------------------------------------------|----------|-----|-----|----|----|----|-----|----|----|
| 80279  | CDK5RAP3  | CDK5 regulatory subunit associated protein 3                  | 0.133643 | Yes | No  | No | No | No | No  | No | No |
| 51442  | VGLL1     | vestigial like 1 (Drosophila)                                 | 0.134855 | Yes | No  | No | No | No | No  | No | No |
| 64881  | PODH20    | protocadherin 20                                              | 0.135137 | Yes | No  | No | No | No | No  | No | No |
| 10066  | SCAMP2    | secretory carrier membrane protein 2                          | 0.135227 | Yes | No  | No | No | No | No  | No | No |
| 130827 | TMEM182   | transmembrane protein 182                                     | 0.135765 | Yes | No  | No | No | No | No  | No | No |
| 979    | CDA       | cytidine deaminase                                            | 0.137995 | Yes | No  | No | No | No | No  | No | No |
| 54543  | TOMM7     | translocase of outer mitochondrial membrane 7 homolog (yeast) | 0.139154 | Yes | No  | No | No | No | No  | No | No |
| 64211  | LHX5      | LIM homeobox 5                                                | 0.139613 | Yes | No  | No | No | No | No  | No | No |
| 3764   | KCNJ8     | potassium inwardly-rectifying channel, subfamily J, member 8  | 0.139788 | Yes | No  | No | No | No | No  | No | No |
| 9474   | ATG5      | ATG5 autophagy related 5 homolog (S. cerevisiae)              | 0.141133 | Yes | No  | No | No | No | No  | No | No |
| 91151  | TIGD7     | tigger transposable element derived 7                         | 0.14221  | Yes | No  | No | No | No | No  | No | No |
| 4276   | MICA      | MHC class I polypeptide-related sequence A                    | 0.143214 | Yes | No  | No | No | No | No  | No | No |
| 5551   | PRF1      | perforin 1 (pore forming protein)                             | 0.143497 | Yes | No  | No | No | No | No  | No | No |
| 112752 | C14orf179 | chromosome 14 open reading frame 179                          | 0.143809 | Yes | No  | No | No | No | No  | No | No |
| 286514 | MAGEB18   | melanoma antigen family B, 18                                 | 0.144224 | Yes | No  | No | No | No | No  | No | No |
| 9992   | KCNE2     | potassium voltage-gated channel, Isk-related family, member 2 | 0.144546 | Yes | No  | No | No | No | No  | No | No |
| 388    | RHOB      | ras homolog gene family, member B                             | 0.144642 | Yes | No  | No | No | No | No  | No | No |
| 79635  | CDC121    | coiled-coil domain containing 121                             | 0.144722 | No  | No  | No | No | No | Yes | No | No |
| 5465   | PPARA     | peroxisome proliferator-activated receptor alpha              | 0.145665 | Yes | No  | No | No | No | No  | No | No |
| 3933   | LCN1      | lipocalin 1 (tear prealbumin)                                 | 0.145975 | Yes | No  | No | No | No | No  | No | No |
| 92291  | CAPN13    | calpain 13                                                    | 0.146468 | Yes | No  | No | No | No | No  | No | No |
| 79685  | SAP30L    | SAP30-like                                                    | 0.146894 | No  | Yes | No | No | No | Yes | No | No |
| 4495   | MT1G      | metallothionein 1G                                            | 0.146903 | Yes | No  | No | No | No | No  | No | No |
| 3236   | HOXD10    | homeobox D10                                                  | 0.147833 | Yes | No  | No | No | No | No  | No | No |
| 427    | ASAH1     | N-acylsphingosine amidohydrolase (acid ceramidase) 1          | 0.148196 | Yes | No  | No | No | No | No  | No | No |
| 80781  | COL18A1   | collagen, type XVIII, alpha 1                                 | 0.149648 | Yes | No  | No | No | No | No  | No | No |
| 84947  | SERAC1    | serine active site containing 1                               | 0.149664 | Yes | No  | No | No | No | No  | No | No |
| 114899 | C1QTNF3   | C1q and tumor necrosis factor related protein 3               | 0.149865 | Yes | Yes | No | No | No | No  | No | No |
| 977    | CD151     | CD151 molecule (Raph blood group)                             | 0.150057 | Yes | No  | No | No | No | No  | No | No |
| 131601 | GPR175    | G protein-coupled receptor 175                                | 0.150595 | Yes | No  | No | No | No | No  | No | No |
| 114881 | OSBPL7    | oxysterol binding protein-like 7                              | 0.152123 | Yes | No  | No | No | No | No  | No | No |
| 55113  | XKR8      | XK, Kell blood group complex subunit-related family, member 8 | 0.15234  | Yes | No  | No | No | No | No  | No | No |
| 5644   | PRSS1     | protease, serine, 1 (trypsin 1)                               | 0.153471 | Yes | No  | No | No | No | No  | No | No |
| 248    | ALPI      | alkaline phosphatase, intestinal                              | 0.153816 | Yes | No  | No | No | No | No  | No | No |

|        |          |                                                               |          |     |     |    |    |    |     |    |    |
|--------|----------|---------------------------------------------------------------|----------|-----|-----|----|----|----|-----|----|----|
| 4940   | OAS3     | 2'-5'-oligoadenylate synthetase 3, 100kDa                     | 0.154291 | Yes | No  | No | No | No | No  | No | No |
| 56896  | DPYSL5   | dihydropyrimidinase-like 5                                    | 0.15447  | Yes | No  | No | No | No | No  | No | No |
| 200132 | TCTEX1D1 | Tctex1 domain containing 1                                    | 0.15486  | Yes | No  | No | No | No | No  | No | No |
| 64231  | MS4A6A   | membrane-spanning 4-domains, subfamily A, member 6A           | 0.156303 | Yes | No  | No | No | No | No  | No | No |
| 2070   | EYA4     | eyes absent homolog 4 (Drosophila)                            | 0.156576 | Yes | No  | No | No | No | No  | No | No |
| 8323   | FZD6     | frizzled homolog 6 (Drosophila)                               | 0.156791 | No  | No  | No | No | No | Yes | No | No |
| 283337 | ZNF740   | zinc finger protein 740                                       | 0.156949 | NA  | No  | No | No | No | Yes | No | No |
| 56223  | TRIM62   | tripartite motif-containing 62                                | 0.156962 | No  | No  | No | No | No | Yes | No | No |
| 9540   | TP53I3   | tumor protein p53 inducible protein 3                         | 0.157305 | Yes | No  | No | No | No | No  | No | No |
| 57048  | PLSCR3   | phospholipid scramblase 3                                     | 0.158558 | Yes | No  | No | No | No | No  | No | No |
| 1207   | CLNS1A   | chloride channel, nucleotide-sensitive, 1A                    | 0.160295 | Yes | No  | No | No | No | Yes | No | No |
| 7561   | ZNF14    | zinc finger protein 14                                        | 0.161857 | Yes | No  | No | No | No | No  | No | No |
| 2848   | GPR25    | G protein-coupled receptor 25                                 | 0.163027 | Yes | No  | No | No | No | No  | No | No |
| 107    | ADCY1    | adenylylate cyclase 1 (brain)                                 | 0.163174 | Yes | No  | No | No | No | No  | No | No |
| 1545   | CYP1B1   | cytochrome P450, family 1, subfamily B, polypeptide 1         | 0.163187 | Yes | No  | No | No | No | No  | No | No |
| 63971  | KIF13A   | kinesin family member 13A                                     | 0.163476 | Yes | Yes | No | No | No | No  | No | No |
| 9684   | LRRC14   | leucine rich repeat containing 14                             | 0.164442 | No  | No  | No | No | No | Yes | No | No |
| 23028  | AOF2     | amine oxidase (flavin containing) domain 2                    | 0.164806 | No  | Yes | No | No | No | Yes | No | No |
| 66004  | LYNX1    | Lyb/neurotoxin 1                                              | 0.164806 | No  | Yes | No | No | No | No  | No | No |
| 4185   | ADAM11   | ADAM metalloproteinase domain 11                              | 0.165517 | Yes | No  | No | No | No | No  | No | No |
| 1509   | CTSD     | cathepsin D                                                   | 0.166414 | Yes | No  | No | No | No | No  | No | No |
| 7587   | ZNF37A   | zinc finger protein 37A                                       | 0.166669 | Yes | No  | No | No | No | No  | No | No |
| 56130  | PCDH6    | protocadherin beta 6                                          | 0.167366 | Yes | No  | No | No | No | No  | No | No |
| 3784   | KCNQ1    | potassium voltage-gated channel, KQT-like subfamily, member 1 | 0.167679 | Yes | No  | No | No | No | No  | No | No |
| 9002   | F2RL3    | coagulation factor II (thrombin) receptor-like 3              | 0.167895 | Yes | No  | No | No | No | No  | No | No |
| 27006  | FGF22    | fibroblast growth factor 22                                   | 0.16806  | Yes | No  | No | No | No | No  | No | No |
| 2738   | GLI4     | GLI-Kruppel family member GLI4                                | 0.168978 | Yes | No  | No | No | No | No  | No | No |
| 339855 | KY       | kyphoscoliosis peptidase                                      | 0.169016 | Yes | No  | No | No | No | No  | No | No |
| 375704 | C9orf165 | chromosome 9 open reading frame 165                           | 0.169613 | Yes | No  | No | No | No | No  | No | No |
| 10133  | OPTN     | optineurin                                                    | 0.17003  | Yes | No  | No | No | No | No  | No | No |
| 6288   | SAA1     | serum amyloid A1                                              | 0.170112 | Yes | No  | No | No | No | No  | No | No |
| 63035  | BCORL1   | BCL6 co-repressor-like 1                                      | 0.171756 | Yes | No  | No | No | No | No  | No | No |
| 7866   | IFRD2    | interferon-related developmental regulator 2                  | 0.172008 | Yes | No  | No | No | No | No  | No | No |
| 10351  | ABCA8    | ATP-binding cassette, sub-family A (ABC1), member 8           | 0.172991 | Yes | No  | No | No | No | No  | No | No |

|        |          |                                                                              |          |     |     |    |    |    |     |    |    |
|--------|----------|------------------------------------------------------------------------------|----------|-----|-----|----|----|----|-----|----|----|
| 50865  | HEBP1    | heme binding protein 1                                                       | 0.174445 | Yes | No  | No | No | No | No  | No | No |
| 10881  | ACTL7A   | actin-like 7A                                                                | 0.17498  | Yes | No  | No | No | No | No  | No | No |
| 7461   | CLIP2    | CAP-GLY domain containing linker protein 2                                   | 0.175243 | Yes | No  | No | No | No | No  | No | No |
| 80350  | LPAL2    | lipoprotein, Lp(a)-like 2                                                    | 0.175515 | Yes | No  | No | No | No | No  | No | No |
| 857    | CAV1     | caveolin 1, caveolae protein, 22kDa                                          | 0.175527 | Yes | No  | No | No | No | No  | No | No |
| 22950  | SLC4A1AP | solute carrier family 4 (anion exchanger), member 1, adaptor protein         | 0.175709 | No  | No  | No | No | No | Yes | No | No |
| 11213  | IRAK3    | interleukin-1 receptor-associated kinase 3                                   | 0.176107 | Yes | No  | No | No | No | No  | No | No |
| 83661  | MS4A8B   | membrane-spanning 4-domains, subfamily A, member 8B                          | 0.176158 | Yes | No  | No | No | No | No  | No | No |
| 339324 | ZNF260   | zinc finger protein 260                                                      | 0.178317 | Yes | No  | No | No | No | No  | No | No |
| 79895  | ATP8B4   | ATPase, class I, type 8B, member 4                                           | 0.179801 | Yes | No  | No | No | No | No  | No | No |
| 2208   | FCER2    | Fc fragment of IgE, low affinity II, receptor for (CD23)                     | 0.180076 | Yes | No  | No | No | No | No  | No | No |
| 6652   | SORD     | sorbitol dehydrogenase                                                       | 0.180673 | Yes | No  | No | No | No | No  | No | No |
| 5900   | RALGDS   | ral guanine nucleotide dissociation stimulator                               | 0.180753 | Yes | No  | No | No | No | No  | No | No |
| 20     | ABCA2    | ATP-binding cassette, sub-family A (ABC1), member 2                          | 0.180795 | Yes | No  | No | No | No | No  | No | No |
| 54848  | FLJ20184 | hypothetical protein FLJ20184                                                | 0.181363 | No  | Yes | No | No | No | No  | No | No |
| 89874  | SLC25A21 | solute carrier family 25 (mitochondrial oxodicarboxylate carrier), member 21 | 0.181791 | Yes | Yes | No | No | No | No  | No | No |
| 23373  | CRTC1    | CREB regulated transcription coactivator 1                                   | 0.182905 | Yes | No  | No | No | No | No  | No | No |
| 22808  | MRAS     | muscle RAS oncogene homolog                                                  | 0.184112 | No  | No  | No | No | No | Yes | No | No |
| 7148   | TNXB     | tenascin XB                                                                  | 0.184406 | Yes | No  | No | No | No | No  | No | No |
| 7733   | ZNF180   | zinc finger protein 180                                                      | 0.184531 | Yes | No  | No | No | No | No  | No | No |
| 8038   | ADAM12   | ADAM metalloproteinase domain 12 (meltrin alpha)                             | 0.185275 | Yes | No  | No | No | No | No  | No | No |
| 53343  | NUDT9    | nudix (nucleoside diphosphate linked moiety X)-type motif 9                  | 0.187092 | Yes | No  | No | No | No | Yes | No | No |
| 148014 | TTC9B    | tetratricopeptide repeat domain 9B                                           | 0.187185 | Yes | No  | No | No | No | No  | No | No |
| 1288   | COL4A6   | collagen, type IV, alpha 6                                                   | 0.187186 | Yes | No  | No | No | No | No  | No | No |
| 10623  | POLR3C   | polymerase (RNA) III (DNA directed) polypeptide C (62kD)                     | 0.187916 | No  | No  | No | No | No | Yes | No | No |
| 2678   | GGT1     | gamma-glutamyltransferase 1                                                  | 0.188428 | Yes | No  | No | No | No | No  | No | No |
| 3385   | ICAM3    | intercellular adhesion molecule 3                                            | 0.190065 | Yes | No  | No | No | No | No  | No | No |
| 65266  | WNK4     | WNK lysine deficient protein kinase 4                                        | 0.191424 | Yes | No  | No | No | No | No  | No | No |
| 8519   | IFITM1   | interferon induced transmembrane protein 1 (9-27)                            | 0.192049 | Yes | No  | No | No | No | No  | No | No |
| 80168  | MOGAT2   | monoacylglycerol O-acyltransferase 2                                         | 0.195121 | Yes | No  | No | No | No | No  | No | No |
| 81573  | ANKRD13C | ankyrin repeat domain 13C                                                    | 0.195516 | Yes | No  | No | No | No | No  | No | No |
| 55214  | LEPREL1  | leprecan-like 1                                                              | 0.195817 | Yes | No  | No | No | No | No  | No | No |
| 256281 | NUDT14   | nudix (nucleoside diphosphate linked moiety X)-type motif 14                 | 0.196205 | Yes | No  | No | No | No | No  | No | No |
| 9223   | MAG11    | membrane associated guanylate kinase, WW and PDZ domain containing 1         | 0.196227 | Yes | No  | No | No | No | No  | No | No |

|        |           |                                                                                |          |     |     |    |    |    |     |    |    |
|--------|-----------|--------------------------------------------------------------------------------|----------|-----|-----|----|----|----|-----|----|----|
| 353514 | LILRA5    | leukocyte immunoglobulin-like receptor, subfamily A (with TM domain), member 5 | 0.197744 | Yes | No  | No | No | No | No  | No | No |
| 29966  | STRN3     | striatin, calmodulin binding protein 3                                         | 0.197944 | No  | No  | No | No | No | Yes | No | No |
| 1397   | CRIP2     | cysteine-rich protein 2                                                        | 0.198217 | Yes | No  | No | No | No | No  | No | No |
| 7746   | ZNF193    | zinc finger protein 193                                                        | 0.198677 | Yes | No  | No | No | No | No  | No | No |
| 843    | CASP10    | caspase 10, apoptosis-related cysteine peptidase                               | 0.199457 | Yes | Yes | No | No | No | No  | No | No |
| 6242   | RTKN      | hrotekin                                                                       | 0.199481 | Yes | No  | No | No | No | No  | No | No |
| 388969 | LOC388969 | hypothetical LOC388969                                                         | 0.199983 | Yes | No  | No | No | No | No  | No | No |
| 2791   | NGG11     | guanine nucleotide binding protein (G protein), gamma 11                       | 0.200299 | Yes | No  | No | No | No | No  | No | No |
| 781    | CACNA2D1  | calcium channel, voltage-dependent, alpha 2/delta subunit 1                    | 0.200307 | Yes | No  | No | No | No | No  | No | No |
| 822    | CAPG      | capping protein (actin filament), gelsolin-like                                | 0.201258 | Yes | No  | No | No | No | No  | No | No |
| 56143  | PCDH45    | protocadherin alpha 5                                                          | 0.202592 | Yes | No  | No | No | No | No  | No | No |
| 2051   | EPHB6     | EPH receptor B6                                                                | 0.204149 | Yes | No  | No | No | No | No  | No | No |
| 10999  | SLC27A4   | solute carrier family 27 (fatty acid transporter), member 4                    | 0.204628 | No  | No  | No | No | No | Yes | No | No |
| 6494   | SIPA1     | signal-induced proliferation-associated gene 1                                 | 0.206247 | Yes | No  | No | No | No | No  | No | No |
| 8731   | RNMT      | RNA (guanine-7) methyltransferase                                              | 0.206247 | Yes | No  | No | No | No | No  | No | No |
| 79089  | TMUB2     | transmembrane and ubiquitin-like domain containing 2                           | 0.206341 | Yes | No  | No | No | No | No  | No | No |
| 10076  | PTPRU     | protein tyrosine phosphatase, receptor type, U                                 | 0.206649 | No  | Yes | No | No | No | No  | No | No |
| 80205  | CHD9      | chromodomain helicase DNA binding protein 9                                    | 0.206842 | Yes | No  | No | No | No | No  | No | No |
| 11107  | PRDM5     | PR domain containing 5                                                         | 0.207479 | Yes | No  | No | No | No | No  | No | No |
| 8740   | TNFSF14   | tumor necrosis factor (ligand) superfamily, member 14                          | 0.20869  | Yes | No  | No | No | No | No  | No | No |
| 116238 | TLCD1     | TLC domain containing 1                                                        | 0.210816 | No  | No  | No | No | No | Yes | No | No |
| 55954  | ZMAT5     | zinc finger, matrix type 5                                                     | 0.211171 | No  | No  | No | No | No | Yes | No | No |
| 3601   | IL15RA    | interleukin 15 receptor, alpha                                                 | 0.212716 | Yes | No  | No | No | No | No  | No | No |
| 23466  | CBX6      | chromobox homolog 6                                                            | 0.212799 | Yes | Yes | No | No | No | No  | No | No |
| 4223   | MEOX2     | mesenchyme homeobox 2                                                          | 0.21302  | Yes | No  | No | No | No | No  | No | No |
| 95     | ACY1      | aminoacylase 1                                                                 | 0.213755 | Yes | No  | No | No | No | No  | No | No |
| 10007  | GNPDA1    | glucosamine-6-phosphate deaminase 1                                            | 0.214507 | Yes | No  | No | No | No | No  | No | No |
| 23247  | KIAA0556  | KIAA0556                                                                       | 0.214808 | Yes | No  | No | No | No | No  | No | No |
| 7627   | ZNF75A    | zinc finger protein 75a                                                        | 0.215401 | Yes | No  | No | No | No | No  | No | No |
| 158405 | KIAA1958  | KIAA1958                                                                       | 0.2161   | NA* | Yes | No | No | No | No  | No | No |
| 9687   | GREB1     | GREB1 protein                                                                  | 0.216601 | Yes | No  | No | No | No | No  | No | No |
| 93210  | PERLD1    | per1-like domain containing 1                                                  | 0.216889 | Yes | No  | No | No | No | No  | No | No |
| 594855 | CPLX3     | complexin 3                                                                    | 0.218058 | Yes | No  | No | No | No | No  | No | No |
| 147372 | CCBE1     | collagen and calcium binding EGF domains 1                                     | 0.21824  | Yes | No  | No | No | No | No  | No | No |

|        |          |                                                                                                  |          |     |     |    |    |    |     |    |    |
|--------|----------|--------------------------------------------------------------------------------------------------|----------|-----|-----|----|----|----|-----|----|----|
| 2444   | FRK      | fyn-related kinase                                                                               | 0.219361 | Yes | No  | No | No | No | No  | No | No |
| 26157  | GIMAP2   | GTPase, IMAP family member 2                                                                     | 0.219649 | Yes | No  | No | No | No | No  | No | No |
| 79865  | TREML2   | triggering receptor expressed on myeloid cells-like 2                                            | 0.220444 | Yes | No  | No | No | No | No  | No | No |
| 283208 | P4HA3    | procollagen-proline, 2-oxoglutarate 4-dioxygenase (proline 4-hydroxylase), alpha polypeptide III | 0.220559 | Yes | No  | No | No | No | No  | No | No |
| 10002  | NR2E3    | nuclear receptor subfamily 2, group E, member 3                                                  | 0.220685 | Yes | No  | No | No | No | No  | No | No |
| 146198 | ZFP90    | zinc finger protein 90 homolog (mouse)                                                           | 0.222021 | Yes | No  | No | No | No | No  | No | No |
| 79155  | TNIP2    | TNFAIP3 interacting protein 2                                                                    | 0.222509 | Yes | No  | No | No | No | No  | No | No |
| 6581   | SLC22A3  | solute carrier family 22 (extraneuronal monoamine transporter), member 3                         | 0.223113 | Yes | No  | No | No | No | No  | No | No |
| 8685   | MARCO    | macrophage receptor with collagenous structure                                                   | 0.224454 | Yes | No  | No | No | No | No  | No | No |
| 50604  | IL20     | interleukin 20                                                                                   | 0.225001 | Yes | No  | No | No | No | No  | No | No |
| 3611   | ILK      | integrin-linked kinase                                                                           | 0.226337 | No  | No  | No | No | No | Yes | No | No |
| 10100  | TSPAN2   | tetraspanin 2                                                                                    | 0.226693 | Yes | No  | No | No | No | No  | No | No |
| 4939   | OAS2     | 2'-5'-oligoadenylate synthetase 2, 69/71kDa                                                      | 0.227709 | Yes | Yes | No | No | No | No  | No | No |
| 63923  | TNN      | tenascin N                                                                                       | 0.228486 | Yes | No  | No | No | No | No  | No | No |
| 115361 | GBP4     | guanylate binding protein 4                                                                      | 0.228603 | Yes | No  | No | No | No | No  | No | No |
| 7771   | ZNF228   | zinc finger protein 228                                                                          | 0.228609 | Yes | No  | No | No | No | No  | No | No |
| 1839   | HBEGF    | heparin-binding EGF-like growth factor                                                           | 0.229863 | Yes | No  | No | No | No | No  | No | No |
| 200316 | APOBEC3F | apolipoprotein B mRNA editing enzyme, catalytic polypeptide-like 3F                              | 0.230037 | Yes | No  | No | No | No | No  | No | No |
| 6103   | RPGR     | retinitis pigmentosa GTPase regulator                                                            | 0.231888 | Yes | No  | No | No | No | No  | No | No |
| 60626  | RIC8A    | resistance to inhibitors of cholinesterase 8 homolog A (C. elegans)                              | 0.232643 | No  | No  | No | No | No | Yes | No | No |
| 84179  | MFSD7    | major facilitator superfamily domain containing 7                                                | 0.233984 | Yes | No  | No | No | No | No  | No | No |
| 54434  | SSH1     | slingshot homolog 1 (Drosophila)                                                                 | 0.234661 | Yes | No  | No | No | No | No  | No | No |
| 10807  | SDCCAG3  | serologically defined colon cancer antigen 3                                                     | 0.235091 | Yes | No  | No | No | No | No  | No | No |
| 285268 | ZNF621   | zinc finger protein 621                                                                          | 0.236186 | Yes | No  | No | No | No | No  | No | No |
| 64838  | FNDC4    | fibronectin type III domain containing 4                                                         | 0.23706  | Yes | No  | No | No | No | No  | No | No |
| 10404  | PGCP     | plasma glutamate carboxypeptidase                                                                | 0.23785  | Yes | No  | No | No | No | No  | No | No |
| 2747   | GLUD2    | glutamate dehydrogenase 2                                                                        | 0.237987 | Yes | No  | No | No | No | No  | No | No |
| 279    | AMY2A    | amylase, alpha 2A (pancreatic)                                                                   | 0.238406 | Yes | No  | No | No | No | No  | No | No |
| 159195 | USP54    | ubiquitin specific peptidase 54                                                                  | 0.239194 | Yes | No  | No | No | No | No  | No | No |
| 64180  | DPEP3    | dipeptidase 3                                                                                    | 0.239416 | Yes | No  | No | No | No | No  | No | No |
| 10640  | EXOC5    | exocyst complex component 5                                                                      | 0.239792 | No  | No  | No | No | No | Yes | No | No |
| 6846   | XCL2     | chemokine (C motif) ligand 2                                                                     | 0.240274 | Yes | No  | No | No | No | No  | No | No |
| 23241  | PACS2    | phosphofurin acidic cluster sorting protein 2                                                    | 0.240471 | Yes | No  | No | No | No | No  | No | No |
| 5903   | RANBP2   | RAN binding protein 2                                                                            | 0.240628 | No  | Yes | No | No | No | No  | No | No |

|        |           |                                                                                                |          |     |     |    |    |    |     |    |    |
|--------|-----------|------------------------------------------------------------------------------------------------|----------|-----|-----|----|----|----|-----|----|----|
| 8425   | LTP4      | latent transforming growth factor beta binding protein 4                                       | 0.24094  | Yes | No  | No | No | No | No  | No | No |
| 9066   | SYT7      | synaptotagmin VII                                                                              | 0.24142  | Yes | No  | No | No | No | No  | No | No |
| 284040 | CDRT4     | CMT1A duplicated region transcript 4                                                           | 0.241726 | Yes | No  | No | No | No | No  | No | No |
| 4681   | NBL1      | neuroblastoma, suppression of tumorigenicity 1                                                 | 0.243595 | Yes | No  | No | No | No | No  | No | No |
| 9841   | ZBTB24    | zinc finger and BTB domain containing 24                                                       | 0.246225 | Yes | No  | No | No | No | No  | No | No |
| 64902  | AGXT2     | alanine-glyoxylate aminotransferase 2                                                          | 0.247713 | Yes | No  | No | No | No | No  | No | No |
| 11226  | GALNT6    | UDP-N-acetyl-alpha-D-galactosamine:polypeptide N-acetylgalactosaminyltransferase 6 (GalNAc-T6) | 0.248186 | Yes | No  | No | No | No | No  | No | No |
| 54828  | BCAS3     | breast carcinoma amplified sequence 3                                                          | 0.250217 | Yes | Yes | No | No | No | No  | No | No |
| 5883   | RAD9A     | RAD9 homolog A (S. pombe)                                                                      | 0.250625 | Yes | No  | No | No | No | No  | No | No |
| 5346   | PLIN      | perilipin                                                                                      | 0.250695 | Yes | No  | No | No | No | No  | No | No |
| 57724  | KIAA1632  | KIAA1632                                                                                       | 0.250702 | Yes | No  | No | No | No | No  | No | No |
| 3048   | HBG2      | hemoglobin, gamma G                                                                            | 0.253064 | Yes | No  | No | No | No | No  | No | No |
| 84224  | NBPF3     | neuroblastoma breakpoint family, member 3                                                      | 0.254062 | Yes | No  | No | No | No | No  | No | No |
| 2719   | GPC3      | glypican 3                                                                                     | 0.254102 | Yes | No  | No | No | No | No  | No | No |
| 57610  | RANBP10   | RAN binding protein 10                                                                         | 0.254676 | Yes | No  | No | No | No | No  | No | No |
| 23405  | DICER1    | dicer 1, ribonuclease type III                                                                 | 0.25513  | Yes | No  | No | No | No | No  | No | No |
| 90423  | ATP6V1E2  | ATPase, H+ transporting, lysosomal 31kDa, V1 subunit E2                                        | 0.255227 | Yes | No  | No | No | No | No  | No | No |
| 157378 | TMEM65    | transmembrane protein 65                                                                       | 0.256062 | Yes | Yes | No | No | No | No  | No | No |
| 2686   | GGT7      | gamma-glutamyltransferase 7                                                                    | 0.256208 | Yes | No  | No | No | No | No  | No | No |
| 80036  | TRPM3     | transient receptor potential cation channel, subfamily M, member 3                             | 0.25651  | Yes | No  | No | No | No | No  | No | No |
| 3851   | KRT4      | keratin 4                                                                                      | 0.256741 | Yes | No  | No | No | No | No  | No | No |
| 83985  | SPNS1     | spinster homolog 1 (Drosophila)                                                                | 0.257961 | No  | No  | No | No | No | Yes | No | No |
| 8681   | PLA2G4B   | hypothetical protein LOC8681                                                                   | 0.25804  | Yes | No  | No | No | No | No  | No | No |
| 3762   | KCNJ5     | potassium inwardly-rectifying channel, subfamily J, member 5                                   | 0.259663 | Yes | No  | No | No | No | No  | No | No |
| 441476 | LOC441476 | hypothetical protein LOC441476                                                                 | 0.259859 | Yes | No  | No | No | No | No  | No | No |
| 26952  | SMR3A     | submaxillary gland androgen regulated protein 3A                                               | 0.260364 | Yes | No  | No | No | No | No  | No | No |
| 6865   | TACR2     | tachykinin receptor 2                                                                          | 0.26147  | Yes | No  | No | No | No | No  | No | No |
| 56145  | PCDHA3    | protocadherin alpha 3                                                                          | 0.261526 | Yes | No  | No | No | No | No  | No | No |
| 10634  | GAS2L1    | growth arrest-specific 2 like 1                                                                | 0.263384 | Yes | No  | No | No | No | No  | No | No |
| 6579   | SLCO1A2   | solute carrier organic anion transporter family, member 1A2                                    | 0.265876 | Yes | No  | No | No | No | No  | No | No |
| 284013 | VMO1      | vitelline membrane outer layer 1 homolog (chicken)                                             | 0.266065 | Yes | No  | No | No | No | No  | No | No |
| 79443  | FYCO1     | FYVE and coiled-coil domain containing 1                                                       | 0.267048 | Yes | No  | No | No | No | No  | No | No |
| 4332   | MNDA      | myeloid cell nuclear differentiation antigen                                                   | 0.267302 | Yes | No  | No | No | No | No  | No | No |
| 79570  | NKAIN1    | Na+/K+ transporting ATPase interacting 1                                                       | 0.269065 | Yes | No  | No | No | No | No  | No | No |

|        |          |                                                                                                |          |     |     |    |    |    |     |     |
|--------|----------|------------------------------------------------------------------------------------------------|----------|-----|-----|----|----|----|-----|-----|
| 9333   | TGM5     | transglutaminase 5                                                                             | 0.269375 | Yes | No  | No | No | No | No  | No  |
| 1356   | CP       | ceruloplasmin (ferroxidase)                                                                    | 0.269578 | Yes | No  | No | No | No | No  | No  |
| 136371 | ASB10    | ankyrin repeat and SOCS box-containing 10                                                      | 0.270239 | Yes | No  | No | No | No | No  | No  |
| 2692   | GHRHR    | growth hormone releasing hormone receptor                                                      | 0.270816 | Yes | No  | No | No | No | No  | No  |
| 1978   | EIF4EBP1 | eukaryotic translation initiation factor 4E binding protein 1                                  | 0.272543 | Yes | No  | No | No | No | No  | No  |
| 57829  | ZP4      | zona pellucida glycoprotein 4                                                                  | 0.273391 | Yes | No  | No | No | No | No  | No  |
| 5799   | PTPRN2   | protein tyrosine phosphatase, receptor type, N polypeptide 2                                   | 0.27438  | Yes | No  | No | No | No | No  | No  |
| 23294  | ANKS1A   | ankyrin repeat and sterile alpha motif domain containing 1A                                    | 0.274553 | No  | No  | No | No | No | Yes | No  |
| 84918  | LRP11    | low density lipoprotein receptor-related protein 11                                            | 0.274638 | Yes | No  | No | No | No | No  | No  |
| 8711   | TNK1     | tyrosine kinase, non-receptor, 1                                                               | 0.275178 | Yes | No  | No | No | No | No  | No  |
| 55231  | CCDC87   | coiled-coil domain containing 87                                                               | 0.277587 | No  | No  | No | No | No | Yes | No  |
| 5463   | POU6F1   | POU class 6 homeobox 1                                                                         | 0.28077  | Yes | No  | No | No | No | No  | No  |
| 79819  | WDR78    | WD repeat domain 78                                                                            | 0.282324 | No  | Yes | No | No | No | No  | No  |
| 26515  | FXC1     | fracture callus 1 homolog (rat)                                                                | 0.282915 | Yes | No  | No | No | No | No  | No  |
| 113179 | ADAT3    | adenosine deaminase, tRNA-specific 3, TAD3 homolog (S. cerevisiae)                             | 0.283796 | Yes | No  | No | No | No | No  | No  |
| 9242   | MSC      | musculin (activated B-cell factor-1)                                                           | 0.283967 | No  | Yes | No | No | No | No  | No  |
| 2245   | FGD1     | FYVE, RhoGEF and PH domain containing 1 (faciogenital dysplasia)                               | 0.286694 | Yes | No  | No | No | No | No  | No  |
| 51019  | CCDC53   | coiled-coil domain containing 53                                                               | 0.286727 | No  | No  | No | No | No | Yes | No  |
| 64772  | FLJ21865 | endo-beta-N-acetylglicosaminidase                                                              | 0.288735 | Yes | No  | No | No | No | No  | No  |
| 79625  | C4orf31  | chromosome 4 open reading frame 31                                                             | 0.288941 | No  | Yes | No | No | No | No  | No  |
| 284058 | KIAA1267 | KIAA1267                                                                                       | 0.288983 | No  | Yes | No | No | No | Yes | No  |
| 818    | CAMK2G   | calcium/calmodulin-dependent protein kinase (CaM kinase) II gamma                              | 0.289042 | No  | No  | No | No | No | Yes | No  |
| 359845 | FAM101B  | family with sequence similarity 101, member B                                                  | 0.289113 | Yes | No  | No | No | No | No  | No  |
| 9283   | GPR37L1  | G protein-coupled receptor 37 like 1                                                           | 0.289819 | Yes | No  | No | No | No | No  | No  |
| 8553   | BHLHB2   | basic helix-loop-helix domain containing, class B, 2                                           | 0.290675 | Yes | No  | No | No | No | No  | No  |
| 2346   | FOLH1    | folate hydrolase (prostate-specific membrane antigen) 1                                        | 0.290776 | Yes | No  | No | No | No | No  | No  |
| 143630 | UBQLNL   | ubiquilin-like                                                                                 | 0.291127 | Yes | No  | No | No | No | No  | No  |
| 6901   | TAZ      | tafazzin (cardiomyopathy, dilated 3A (X-linked); endocardial fibroelastosis 2; Barth syndrome) | 0.291744 | Yes | No  | No | No | No | No  | No  |
| 81693  | AMN      | amionless homolog (mouse)                                                                      | 0.291892 | Yes | No  | No | No | No | No  | No  |
| 80790  | CMP      | c-Maf-inducing protein                                                                         | 0.292792 | Yes | No  | No | No | No | No  | No  |
| 139411 | PTCHD1   | patched domain containing 1                                                                    | 0.29456  | Yes | No  | No | No | No | No  | No  |
| 7701   | ZNF142   | zinc finger protein 142                                                                        | 0.294742 | No  | No  | No | No | No | Yes | Yes |
| 96764  | TGS1     | trimethylguanosine synthase homolog (S. cerevisiae)                                            | 0.297434 | No  | No  | No | No | No | Yes | No  |
| 11098  | PRSS23   | protease, serine, 23                                                                           | 0.29755  | Yes | No  | No | No | No | No  | No  |

|        |          |                                                                                       |          |     |     |    |    |    |     |    |
|--------|----------|---------------------------------------------------------------------------------------|----------|-----|-----|----|----|----|-----|----|
| 5442   | POLRMT   | polymerase (RNA) mitochondrial (DNA directed)                                         | 0.297563 | Yes | No  | No | No | No | No  | No |
| 9457   | FHL5     | four and a half LIM domains 5                                                         | 0.29817  | Yes | No  | No | No | No | No  | No |
| 6751   | SSTR1    | somatostatin receptor 1                                                               | 0.299046 | Yes | No  | No | No | No | No  | No |
| 9092   | SART1    | squamous cell carcinoma antigen recognized by T cells                                 | 0.299411 | No  | Yes | No | No | No | No  | No |
| 40073  | FLJ40142 | FLJ40142 protein                                                                      | 0.299802 | Yes | No  | No | No | No | No  | No |
| 4118   | MAL      | mal, T-cell differentiation protein                                                   | 0.299842 | Yes | No  | No | No | No | No  | No |
| 54893  | MTMR10   | myotubularin related protein 10                                                       | 0.300736 | Yes | No  | No | No | No | No  | No |
| 91869  | RFT1     | RFT1 homolog (S. cerevisiae)                                                          | 0.301675 | Yes | No  | No | No | No | No  | No |
| 23683  | PRKD3    | protein kinase D3                                                                     | 0.302348 | No  | Yes | No | No | No | No  | No |
| 55701  | FLJ10357 | hypothetical protein FLJ10357                                                         | 0.302381 | Yes | No  | No | No | No | No  | No |
| 2074   | ERCC6    | excision repair cross-complementing rodent repair deficiency, complementation group 6 | 0.302639 | No  | No  | No | No | No | Yes | No |
| 65987  | KCTD14   | potassium channel tetramerisation domain containing 14                                | 0.304755 | Yes | No  | No | No | No | No  | No |
| 170575 | GIMAP1   | GTPase, IMAP family member 1                                                          | 0.307054 | Yes | No  | No | No | No | No  | No |
| 815    | CAMK2A   | calcium/calmodulin-dependent protein kinase (CaM kinase) II alpha                     | 0.308346 | Yes | No  | No | No | No | No  | No |
| 363    | AQP6     | aquaporin 6, kidney specific                                                          | 0.309098 | Yes | No  | No | No | No | No  | No |
| 1236   | CCR7     | chemokine (C-C motif) receptor 7                                                      | 0.309156 | Yes | Yes | No | No | No | No  | No |
| 3990   | LIPC     | lipase, hepatic                                                                       | 0.309461 | Yes | No  | No | No | No | No  | No |
| 3849   | KRT2     | keratin 2 (epidermal ichthyosis bullosa of Siemens)                                   | 0.310469 | Yes | No  | No | No | No | No  | No |
| 79673  | ZNF329   | zinc finger protein 329                                                               | 0.314961 | Yes | No  | No | No | No | No  | No |
| 8242   | JARID1C  | jumonji, AT rich interactive domain 1C                                                | 0.315398 | Yes | No  | No | No | No | No  | No |
| 10647  | SCGB1D2  | secretoglobin, family 1D, member 2                                                    | 0.31575  | Yes | No  | No | No | No | No  | No |
| 79925  | SPEF2    | sperm flagellar 2                                                                     | 0.315808 | Yes | No  | No | No | No | No  | No |
| 84174  | SLA2     | Src-like-adaptor 2                                                                    | 0.316274 | Yes | No  | No | No | No | No  | No |
| 2868   | GRK4     | G protein-coupled receptor kinase 4                                                   | 0.316592 | No  | No  | No | No | No | Yes | No |
| 617    | BCS1L    | BCS1-like (yeast)                                                                     | 0.316921 | No  | No  | No | No | No | Yes | No |
| 51185  | CRBN     | cereblon                                                                              | 0.317907 | Yes | No  | No | No | No | No  | No |
| 51150  | SDF4     | stromal cell derived factor 4                                                         | 0.318904 | Yes | No  | No | No | No | No  | No |
| 79899  | FLJ14213 | protor-2                                                                              | 0.319608 | Yes | No  | No | No | No | No  | No |
| 286187 | LRRRC67  | leucine rich repeat containing 67                                                     | 0.323017 | NA  | No  | No | No | No | Yes | No |
| 249    | ALPL     | alkaline phosphatase, liver/bone/kidney                                               | 0.323509 | Yes | No  | No | No | No | No  | No |
| 55554  | KLK15    | kallikrein-related peptidase 15                                                       | 0.324808 | Yes | No  | No | No | No | No  | No |
| 116085 | SLC22A12 | solute carrier family 22 (organic anion/urate transporter), member 12                 | 0.325411 | Yes | No  | No | No | No | No  | No |
| 131578 | LRRRC15  | leucine rich repeat containing 15                                                     | 0.325989 | Yes | No  | No | No | No | No  | No |
| 29800  | ZDHHC1   | zinc finger, DHHC-type containing 1                                                   | 0.326086 | Yes | No  | No | No | No | No  | No |



|        |          |                                                                                  |          |     |     |    |    |    |     |     |     |
|--------|----------|----------------------------------------------------------------------------------|----------|-----|-----|----|----|----|-----|-----|-----|
| 157922 | CAMSAP1  | calmodulin regulated spectrin-associated protein 1                               | 0.326913 | Yes | No  | No | No | No | No  | No  | No  |
| 11259  | FILIP1L  | filamin A interacting protein 1-like                                             | 0.327358 | Yes | No  | No | No | No | No  | No  | No  |
| 283375 | SLC39A5  | solute carrier family 39 (metal ion transporter), member 5                       | 0.328227 | Yes | No  | No | No | No | No  | No  | No  |
| 25836  | NIPBL    | Nipped-B homolog (Drosophila)                                                    | 0.328664 | No  | No  | No | No | No | Yes | Yes | Yes |
| 26476  | OR10J1   | olfactory receptor, family 10, subfamily J, member 1                             | 0.329146 | Yes | No  | No | No | No | No  | No  | No  |
| 8633   | UNC5C    | unc-5 homolog C (C. elegans)                                                     | 0.330462 | Yes | No  | No | No | No | No  | No  | No  |
| 5199   | CFP      | complement factor properdin                                                      | 0.330537 | Yes | No  | No | No | No | No  | No  | No  |
| 6124   | RPL4     | ribosomal protein L4                                                             | 0.330553 | Yes | Yes | No | No | No | No  | No  | No  |
| 4694   | NDUFA1   | NADH dehydrogenase (ubiquinone) 1 alpha subcomplex, 1, 7.5kDa                    | 0.330746 | No  | No  | No | No | No | Yes | Yes | No  |
| 55735  | DNAJC11  | DnaJ (Hsp40) homolog, subfamily C, member 11                                     | 0.331448 | Yes | No  | No | No | No | No  | No  | No  |
| 92595  | ZNF764   | zinc finger protein 764                                                          | 0.333117 | Yes | No  | No | No | No | No  | No  | No  |
| 2528   | FUT6     | fucosyltransferase 6 (alpha (1,3) fucosyltransferase)                            | 0.333574 | Yes | Yes | No | No | No | No  | No  | No  |
| 114049 | WBSCR22  | Williams Beuren syndrome chromosome region 22                                    | 0.334462 | Yes | No  | No | No | No | No  | No  | No  |
| 3176   | HNMT     | histamine N-methyltransferase                                                    | 0.334633 | Yes | No  | No | No | No | No  | No  | No  |
| 51272  | BET1L    | blocked early in transport 1 homolog (S. cerevisiae)-like                        | 0.334638 | Yes | No  | No | No | No | Yes | Yes | No  |
| 57563  | KLHL8    | kelch-like 8 (Drosophila)                                                        | 0.335481 | Yes | No  | No | No | No | No  | No  | No  |
| 10747  | MASP2    | mannan-binding lectin serine peptidase 2                                         | 0.335615 | Yes | No  | No | No | No | No  | No  | No  |
| 7087   | ICAM5    | intercellular adhesion molecule 5, telencephalin                                 | 0.335866 | No  | No  | No | No | No | Yes | Yes | No  |
| 115273 | RAB42    | RAB42, member RAS oncogene family                                                | 0.336818 | Yes | No  | No | No | No | No  | No  | No  |
| 4061   | LY6E     | lymphocyte antigen 6 complex, locus E                                            | 0.337822 | Yes | Yes | No | No | No | No  | No  | No  |
| 9290   | GPR55    | G protein-coupled receptor 55                                                    | 0.338693 | Yes | No  | No | No | No | No  | No  | No  |
| 29888  | STRN4    | striatin, calmodulin binding protein 4                                           | 0.338875 | Yes | No  | No | No | No | No  | No  | No  |
| 22927  | HABP4    | hyaluronan binding protein 4                                                     | 0.340691 | Yes | No  | No | No | No | No  | No  | No  |
| 874    | CBR3     | carbonyl reductase 3                                                             | 0.341355 | Yes | No  | No | No | No | No  | No  | No  |
| 54575  | UGT1A10  | UDP glucuronosyltransferase 1 family, polypeptide A10                            | 0.342448 | Yes | No  | No | No | No | No  | No  | No  |
| 55622  | TTC27    | tetraatricopeptide repeat domain 27                                              | 0.343411 | Yes | No  | No | No | No | No  | No  | No  |
| 6882   | TAF11    | TAF11 RNA polymerase II, TATA box binding protein (TBP)-associated factor, 28kDa | 0.344306 | No  | No  | No | No | No | Yes | Yes | No  |
| 9834   | KIAA0125 | KIAA0125                                                                         | 0.344945 | Yes | No  | No | No | No | No  | No  | No  |
| 56953  | NT5M     | 5',3'-nucleotidase, mitochondrial                                                | 0.349333 | Yes | No  | No | No | No | No  | No  | No  |
| 1803   | DPP4     | dipeptidyl-peptidase 4 (CD26, adenosine deaminase complexing protein 2)          | 0.349536 | Yes | No  | No | No | No | No  | No  | No  |
| 54577  | UGT1A7   | UDP glucuronosyltransferase 1 family, polypeptide A7                             | 0.350125 | Yes | No  | No | No | No | No  | No  | No  |
| 148932 | MOBK12C  | MOB1, Mps One Binder kinase activator-like 2C (yeast)                            | 0.350921 | Yes | No  | No | No | No | No  | No  | No  |
| 83641  | FAM107B  | family with sequence similarity 107, member B                                    | 0.351254 | No  | Yes | No | No | No | No  | No  | No  |
| 9053   | MAP7     | microtubule-associated protein 7                                                 | 0.351329 | Yes | No  | No | No | No | No  | No  | No  |

|        |            |                                                                                    |          |     |     |    |    |    |     |     |     |
|--------|------------|------------------------------------------------------------------------------------|----------|-----|-----|----|----|----|-----|-----|-----|
| 408    | ARRB1      | arrestin, beta 1                                                                   | 0.35299  | Yes | No  | No | No | No | No  | No  | No  |
| 57582  | KCNT1      | potassium channel, subfamily T, member 1                                           | 0.353456 | Yes | No  | No | No | No | No  | No  | No  |
| 7786   | MAP3K12    | mitogen-activated protein kinase kinase kinase 12                                  | 0.35397  | Yes | No  | No | No | No | No  | No  | No  |
| 81855  | SFXN3      | sideroflexin 3                                                                     | 0.356207 | Yes | No  | No | No | No | Yes | Yes | Yes |
| 10514  | MYBBP1A    | MYB binding protein (P160) 1a                                                      | 0.357184 | Yes | No  | No | No | No | No  | No  | No  |
| 27099  | C7orf54    | chromosome 7 open reading frame 54                                                 | 0.358775 | Yes | No  | No | No | No | No  | No  | No  |
| 54360  | CYTL1      | cytokine-like 1                                                                    | 0.359653 | Yes | No  | No | No | No | No  | No  | No  |
| 10384  | BTN3A3     | butyrophilin, subfamily 3, member A3                                               | 0.360126 | Yes | No  | No | No | No | No  | No  | No  |
| 671    | BPI        | bactericidal/permeability-increasing protein                                       | 0.360281 | Yes | No  | No | No | No | No  | No  | No  |
| 90957  | DHX57      | DEAH (Asp-Glu-Ala-Asp/His) box polypeptide 57                                      | 0.361211 | Yes | No  | No | No | No | No  | No  | No  |
| 6351   | CCL4       | chemokine (C-C motif) ligand 4                                                     | 0.361723 | Yes | No  | No | No | No | No  | No  | No  |
| 63897  | HEATR6     | HEAT repeat containing 6                                                           | 0.363212 | Yes | Yes | No | No | No | No  | No  | No  |
| 23017  | FAIM2      | Fas apoptotic inhibitory molecule 2                                                | 0.363214 | Yes | No  | No | No | No | No  | No  | No  |
| 81932  | HDHD3      | haloacid dehalogenase-like hydrolase domain containing 3                           | 0.364393 | Yes | No  | No | No | No | No  | No  | No  |
| 114548 | NLRP3      | NLR family, pyrin domain containing 3                                              | 0.365205 | Yes | No  | No | No | No | No  | No  | No  |
| 91355  | LRPSL      | low density lipoprotein receptor-related protein 5-like                            | 0.366367 | Yes | No  | No | No | No | No  | No  | No  |
| 84677  | DSCR8      | Down syndrome critical region gene 8                                               | 0.366921 | Yes | No  | No | No | No | No  | No  | No  |
| 55466  | DNAJA4     | DnaJ (Hsp40) homolog, subfamily A, member 4                                        | 0.368536 | Yes | No  | No | No | No | No  | No  | No  |
| 55667  | ZNF692     | zinc finger protein 692                                                            | 0.370939 | Yes | No  | No | No | No | Yes | No  | No  |
| 28348  | FLJ37464   | hypothetical protein FLJ37464                                                      | 0.370957 | Yes | No  | No | No | No | No  | No  | No  |
| 777    | CACNA1E    | calcium channel, voltage-dependent, R type, alpha 1E subunit                       | 0.371099 | Yes | No  | No | No | No | No  | No  | No  |
| 10439  | OLFM1      | olfactomedin 1                                                                     | 0.371173 | Yes | No  | No | No | No | No  | No  | No  |
| 148266 | ZNF569     | zinc finger protein 569                                                            | 0.376674 | No  | No  | No | No | No | Yes | No  | No  |
| 2635   | GBP3       | guanylate binding protein 3                                                        | 0.378072 | Yes | No  | No | No | No | No  | No  | No  |
| 4054   | LTBP3      | latent transforming growth factor beta binding protein 3                           | 0.38051  | Yes | No  | No | No | No | No  | No  | No  |
| 23544  | SEZ6L      | seizure related 6 homolog (mouse)-like                                             | 0.381313 | Yes | No  | No | No | No | No  | No  | No  |
| 7035   | TFPI       | tissue factor pathway inhibitor (lipoprotein-associated coagulation inhibitor)     | 0.381856 | Yes | No  | No | No | No | No  | No  | No  |
| 9099   | USP2       | ubiquitin specific peptidase 2                                                     | 0.382607 | Yes | No  | No | No | No | No  | No  | No  |
| 57605  | PITPNM2    | phosphatidylinositol transfer protein, membrane-associated 2                       | 0.383014 | Yes | No  | No | No | No | No  | No  | No  |
| 79983  | POF1B      | premature ovarian failure, 1B                                                      | 0.38649  | Yes | No  | No | No | No | No  | No  | No  |
| 8764   | TNFRSF14   | tumor necrosis factor receptor superfamily, member 14 (herpesvirus entry mediator) | 0.387643 | Yes | No  | No | No | No | No  | No  | No  |
| 1903   | S1PR3      | sphingosine-1-phosphate receptor 3                                                 | 0.38785  | Yes | No  | No | No | No | No  | No  | No  |
| 148808 | MFSD4      | major facilitator superfamily domain containing 4                                  | 0.388216 | Yes | No  | No | No | No | No  | No  | No  |
| 90480  | GADD45GIP1 | growth arrest and DNA-damage-inducible, gamma interacting protein 1                | 0.38865  | Yes | No  | No | No | No | No  | No  | No  |

|        |          |                                                                               |          |     |     |    |    |    |     |    |    |
|--------|----------|-------------------------------------------------------------------------------|----------|-----|-----|----|----|----|-----|----|----|
| 6804   | STX1A    | syntrophin 1A (brain)                                                         | 0.390147 | Yes | No  | No | No | No | No  | No | No |
| 3750   | KCND1    | potassium voltage-gated channel, Shal-related subfamily, member 1             | 0.390149 | Yes | No  | No | No | No | No  | No | No |
| 8434   | RECK     | reversion-inducing-cysteine-rich protein with kazal motifs                    | 0.390786 | Yes | No  | No | No | No | No  | No | No |
| 5660   | PSAP     | prosaposin (variant Gaucher disease and variant metachromatic leukodystrophy) | 0.391361 | Yes | No  | No | No | No | No  | No | No |
| 6330   | SCN4B    | sodium channel, voltage-gated, type IV, beta                                  | 0.392926 | Yes | No  | No | No | No | No  | No | No |
| 23065  | KIAA0090 | KIAA0090                                                                      | 0.393883 | Yes | No  | No | No | No | No  | No | No |
| 92400  | RBM18    | RNA binding motif protein 18                                                  | 0.394322 | Yes | Yes | No | No | No | Yes | No | No |
| 23641  | LDOC1    | leucine zipper, down-regulated in cancer 1                                    | 0.395295 | Yes | No  | No | No | No | No  | No | No |
| 23024  | PDZRN3   | PDZ domain containing RING finger 3                                           | 0.396608 | Yes | No  | No | No | No | No  | No | No |
| 149076 | ZNF362   | zinc finger protein 362                                                       | 0.397025 | Yes | No  | No | No | No | No  | No | No |
| 90592  | ZNF700   | zinc finger protein 700                                                       | 0.402445 | Yes | No  | No | No | No | Yes | No | No |
| 4878   | NPPA     | natriuretic peptide precursor A                                               | 0.40307  | Yes | No  | No | No | No | No  | No | No |
| 374654 | KIF7     | kinesin family member 7                                                       | 0.40366  | Yes | No  | No | No | No | No  | No | No |
| 373863 | DND1     | dead end homolog 1 (zebrafish)                                                | 0.403825 | Yes | No  | No | No | No | No  | No | No |
| 91461  | LOC91461 | hypothetical protein BC007901                                                 | 0.405047 | Yes | No  | No | No | No | No  | No | No |
| 6568   | SLC17A1  | solute carrier family 17 (sodium phosphate), member 1                         | 0.407009 | Yes | No  | No | No | No | No  | No | No |
| 54477  | PLEKHA5  | pleckstrin homology domain containing, family A member 5                      | 0.409522 | Yes | No  | No | No | No | No  | No | No |
| 9095   | TBX19    | T-box 19                                                                      | 0.409794 | Yes | No  | No | No | No | No  | No | No |
| 9829   | DNAJC6   | DnaJ (Hsp40) homolog, subfamily C, member 6                                   | 0.413301 | Yes | No  | No | No | No | No  | No | No |
| 57578  | KIAA1409 | KIAA1409                                                                      | 0.418146 | No  | No  | No | No | No | Yes | No | No |
| 9132   | KCNQ4    | potassium voltage-gated channel, KQT-like subfamily, member 4                 | 0.419491 | No  | Yes | No | No | No | No  | No | No |
| 6476   | SI       | sucrase-isomaltase (alpha-glucosidase)                                        | 0.42379  | Yes | No  | No | No | No | No  | No | No |
| 10875  | FGL2     | fibrinogen-like 2                                                             | 0.424994 | Yes | No  | No | No | No | No  | No | No |
| 253782 | LASS6    | LAG1 homolog, ceramide synthase 6                                             | 0.425201 | Yes | Yes | No | No | No | No  | No | No |
| 9986   | RCE1     | RCE1 homolog, prenyl protein peptidase ( <i>S. cerevisiae</i> )               | 0.426193 | Yes | No  | No | No | No | No  | No | No |
| 54676  | GTPBP2   | GTP binding protein 2                                                         | 0.428628 | No  | No  | No | No | No | Yes | No | No |
| 3074   | HEXB     | hexosaminidase B (beta polypeptide)                                           | 0.428674 | Yes | No  | No | No | No | No  | No | No |
| 1120   | CHKB     | choline kinase beta                                                           | 0.430056 | Yes | No  | No | No | No | No  | No | No |
| 3929   | LBP      | lipopolysaccharide binding protein                                            | 0.430593 | Yes | No  | No | No | No | No  | No | No |
| 55697  | VAC14    | Vac14 homolog ( <i>S. cerevisiae</i> )                                        | 0.430628 | Yes | No  | No | No | No | No  | No | No |
| 3654   | IRAK1    | interleukin-1 receptor-associated kinase 1                                    | 0.430711 | Yes | No  | No | No | No | No  | No | No |
| 3904   | LAIR2    | leukocyte-associated immunoglobulin-like receptor 2                           | 0.432247 | Yes | No  | No | No | No | No  | No | No |
| 79132  | DHX58    | DEXH (Asp-Glu-X-His) box polypeptide 58                                       | 0.436571 | Yes | No  | No | No | No | No  | No | No |
| 23324  | MAN2B2   | mannosidase, alpha, class 2B, member 2                                        | 0.440182 | Yes | No  | No | No | No | No  | No | No |

|        |           |                                                                                   |          |     |     |    |    |    |     |    |    |
|--------|-----------|-----------------------------------------------------------------------------------|----------|-----|-----|----|----|----|-----|----|----|
| 5817   | PVR       | poliovirus receptor                                                               | 0.443876 | Yes | No  | No | No | No | No  | No | No |
| 5284   | PIGR      | polymeric immunoglobulin receptor                                                 | 0.44472  | Yes | No  | No | No | No | No  | No | No |
| 5313   | PKLR      | pyruvate kinase, liver and RBC                                                    | 0.445009 | Yes | No  | No | No | No | No  | No | No |
| 10000  | AKT3      | v-akt murine thymoma viral oncogene homolog 3 (protein kinase B, gamma)           | 0.445905 | Yes | No  | No | No | No | No  | No | No |
| 89782  | LMLN      | leishmanolysin-like (metallopeptidase M8 family)                                  | 0.446012 | Yes | No  | No | No | No | No  | No | No |
| 9545   | RAB3D     | RAB3D, member RAS oncogene family                                                 | 0.447374 | Yes | No  | No | No | No | No  | No | No |
| 79637  | ARMC7     | armadillo repeat containing 7                                                     | 0.448649 | Yes | No  | No | No | No | No  | No | No |
| 5618   | PRLR      | prolactin receptor                                                                | 0.451076 | Yes | No  | No | No | No | No  | No | No |
| 9880   | ZBTB39    | zinc finger and BTB domain containing 39                                          | 0.451345 | Yes | No  | No | No | No | No  | No | No |
| 166012 | CHST13    | carbohydrate (chondroitin 4) sulfotransferase 13                                  | 0.452808 | Yes | No  | No | No | No | No  | No | No |
| 26538  | OR10H2    | olfactory receptor, family 10, subfamily H, member 2                              | 0.453458 | Yes | No  | No | No | No | No  | No | No |
| 80328  | ULBP2     | UL16 binding protein 2                                                            | 0.453694 | Yes | No  | No | No | No | No  | No | No |
| 496    | ATP4B     | ATPase, H+/K+ exchanging, beta polypeptide                                        | 0.458019 | Yes | No  | No | No | No | No  | No | No |
| 132946 | ARL9      | ADP-ribosylation factor-like 9                                                    | 0.458776 | Yes | No  | No | No | No | No  | No | No |
| 2217   | FCGRT     | Fc fragment of IgG, receptor, transporter, alpha                                  | 0.465641 | Yes | No  | No | No | No | No  | No | No |
| 22861  | NLRP1     | NLR family, pyrin domain containing 1                                             | 0.466211 | Yes | No  | No | No | No | No  | No | No |
| 4056   | LTC4S     | leukotriene C4 synthase                                                           | 0.470174 | Yes | No  | No | No | No | No  | No | No |
| 7083   | TK1       | thymidine kinase 1, soluble                                                       | 0.473671 | No  | Yes | No | No | No | No  | No | No |
| 9727   | RAB11FIP3 | RAB11 family interacting protein 3 (class II)                                     | 0.474237 | Yes | No  | No | No | No | No  | No | No |
| 57823  | SLAMF7    | SLAM family member 7                                                              | 0.474842 | Yes | No  | No | No | No | No  | No | No |
| 1471   | CST3      | cystatin C                                                                        | 0.47661  | Yes | No  | No | No | No | No  | No | No |
| 79799  | UGT2A3    | UDP glucuronosyltransferase 2 family, polypeptide A3                              | 0.478107 | Yes | No  | No | No | No | No  | No | No |
| 84166  | NLRC5     | NLR family, CARD domain containing 5                                              | 0.478989 | Yes | No  | No | No | No | No  | No | No |
| 216    | ALDH1A1   | aldehyde dehydrogenase 1 family, member A1                                        | 0.479837 | Yes | No  | No | No | No | No  | No | No |
| 4818   | NKG7      | natural killer cell group 7 sequence                                              | 0.48041  | Yes | No  | No | No | No | No  | No | No |
| 57763  | ANKRA2    | ankyrin repeat, family A (RFXANK-like), 2                                         | 0.483183 | Yes | No  | No | No | No | No  | No | No |
| 307    | ANXA4     | annexin A4                                                                        | 0.485495 | Yes | Yes | No | No | No | No  | No | No |
| 80243  | DEPDC2    | DEP domain containing 2                                                           | 0.486382 | Yes | No  | No | No | No | No  | No | No |
| 4719   | NDUFS1    | NADH dehydrogenase (ubiquinone) Fe-S protein 1, 75kDa (NADH-coenzyme Q reductase) | 0.487001 | No  | No  | No | No | No | Yes | No | No |
| 90313  | TP53I13   | tumor protein p53 inducible protein 13                                            | 0.487386 | No  | No  | No | No | No | Yes | No | No |
| 2700   | GJA3      | gap junction protein, alpha 3, 46kDa                                              | 0.487738 | Yes | No  | No | No | No | No  | No | No |
| 92292  | GLYATL1   | glycine-N-acyltransferase-like 1                                                  | 0.489792 | Yes | No  | No | No | No | No  | No | No |
| 57477  | SHROOM4   | shroom family member 4                                                            | 0.492016 | Yes | No  | No | No | No | No  | No | No |
| 6347   | CCL2      | chemokine (C-C motif) ligand 2                                                    | 0.492029 | Yes | No  | No | No | No | No  | No | No |

|        |          |                                                                                               |          |     |     |    |    |    |     |    |    |
|--------|----------|-----------------------------------------------------------------------------------------------|----------|-----|-----|----|----|----|-----|----|----|
| 57121  | LPAR5    | lysophosphatidic acid receptor 5                                                              | 0.492732 | Yes | No  | No | No | No | No  | No | No |
| 2207   | FCER1G   | Fc fragment of IgE, high affinity 1, receptor for, gamma polypeptide                          | 0.49317  | Yes | No  | No | No | No | No  | No | No |
| 54933  | RHBDL2   | rhomboid, veinlet-like 2 (Drosophila)                                                         | 0.495495 | Yes | No  | No | No | No | No  | No | No |
| 7130   | TNFAIP6  | tumor necrosis factor, alpha-induced protein 6                                                | 0.498376 | Yes | No  | No | No | No | No  | No | No |
| 57653  | KIAA1529 | KIAA1529                                                                                      | 0.499367 | Yes | No  | No | No | No | No  | No | No |
| 27180  | SIGLEC9  | sialic acid binding Ig-like lectin 9                                                          | 0.500041 | Yes | No  | No | No | No | No  | No | No |
| 280    | AMY2B    | amylase, alpha 2B (pancreatic)                                                                | 0.502373 | Yes | No  | No | No | No | No  | No | No |
| 64388  | GREM2    | gremlin 2, cysteine knot superfamily, homolog (Xenopus laevis)                                | 0.503404 | Yes | No  | No | No | No | No  | No | No |
| 3581   | IL9R     | interleukin 9 receptor                                                                        | 0.50482  | Yes | No  | No | No | No | No  | No | No |
| 796    | CALCA    | calcitonin-related polypeptide alpha                                                          | 0.506322 | Yes | No  | No | No | No | No  | No | No |
| 11012  | KLK11    | kallikrein-related peptidase 11                                                               | 0.507976 | Yes | No  | No | No | No | No  | No | No |
| 344    | APOC2    | apolipoprotein C-II                                                                           | 0.508155 | Yes | No  | No | No | No | No  | No | No |
| 57209  | ZNF248   | zinc finger protein 248                                                                       | 0.509637 | Yes | No  | No | No | No | No  | No | No |
| 80227  | PAAF1    | proteasomal ATPase-associated factor 1                                                        | 0.511026 | No  | No  | No | No | No | Yes | No | No |
| 23246  | BOP1     | block of proliferation 1                                                                      | 0.514209 | Yes | No  | No | No | No | No  | No | No |
| 3897   | L1CAM    | L1 cell adhesion molecule                                                                     | 0.514881 | Yes | No  | No | No | No | No  | No | No |
| 2022   | ENG      | endoglin (Oster-Rendu-Weber syndrome 1)                                                       | 0.515566 | Yes | No  | No | No | No | No  | No | No |
| 1406   | CRX      | cone-rod homeobox                                                                             | 0.516834 | Yes | No  | No | No | No | No  | No | No |
| 11096  | ADAMT5   | ADAM metalloproteinase with thrombospondin type 1 motif, 5 (aggrecanase-2)                    | 0.517927 | No  | Yes | No | No | No | No  | No | No |
| 157869 | RPESP    | RPE-spondin                                                                                   | 0.518572 | Yes | No  | No | No | No | No  | No | No |
| 6011   | GRK1     | G protein-coupled receptor kinase 1                                                           | 0.519067 | Yes | No  | No | No | No | No  | No | No |
| 79726  | WDR59    | WD repeat domain 59                                                                           | 0.520891 | Yes | No  | No | No | No | No  | No | No |
| 57552  | AADACL1  | arylsulfatase-like 1                                                                          | 0.524607 | Yes | No  | No | No | No | No  | No | No |
| 527    | ATP6V0C  | ATPase, H+ transporting, lysosomal 16kDa, V0 subunit c                                        | 0.527156 | Yes | No  | No | No | No | No  | No | No |
| 353500 | BMP8A    | bone morphogenetic protein 8a                                                                 | 0.527356 | Yes | No  | No | No | No | No  | No | No |
| 6758   | SSX5     | synovial sarcoma, X breakpoint 5                                                              | 0.529476 | Yes | No  | No | No | No | No  | No | No |
| 154075 | SAMD3    | sterile alpha motif domain containing 3                                                       | 0.530376 | Yes | No  | No | No | No | No  | No | No |
| 189    | AGXT     | alanine-glyoxylate aminotransferase                                                           | 0.533361 | Yes | No  | No | No | No | No  | No | No |
| 7673   | ZNF222   | zinc finger protein 222                                                                       | 0.534936 | Yes | No  | No | No | No | No  | No | No |
| 2832   | NPBWR2   | neuropeptides B/W receptor 2                                                                  | 0.535208 | Yes | No  | No | No | No | No  | No | No |
| 6926   | TBX3     | T-box 3 (lunar mammary syndrome)                                                              | 0.536834 | Yes | No  | No | No | No | No  | No | No |
| 11202  | KLK8     | kallikrein-related peptidase 8                                                                | 0.536991 | No  | Yes | No | No | No | No  | No | No |
| 1437   | CSF2     | colony stimulating factor 2 (granulocyte-macrophage)                                          | 0.539887 | Yes | No  | No | No | No | No  | No | No |
| 2907   | GRINA    | glutamate receptor, ionotropic, N-methyl D-aspartate-associated protein 1 (glutamate binding) | 0.543179 | Yes | No  | No | No | No | No  | No | No |

|        |         |                                                                                          |          |     |     |    |    |    |    |    |
|--------|---------|------------------------------------------------------------------------------------------|----------|-----|-----|----|----|----|----|----|
| 6915   | TBXA2R  | thromboxane A2 receptor                                                                  | 0.543886 | Yes | No  | No | No | No | No | No |
| 83933  | HDAC10  | histone deacetylase 10                                                                   | 0.551233 | Yes | No  | No | No | No | No | No |
| 23787  | MTCH1   | mitochondrial carrier homolog 1 (C. elegans)                                             | 0.55225  | Yes | No  | No | No | No | No | No |
| 1441   | CSF3R   | colony stimulating factor 3 receptor (granulocyte)                                       | 0.556032 | Yes | No  | No | No | No | No | No |
| 5913   | RAPSN   | receptor-associated protein of the synapse                                               | 0.559184 | Yes | No  | No | No | No | No | No |
| 124093 | CCDC78  | coiled-coil domain containing 78                                                         | 0.560335 | Yes | No  | No | No | No | No | No |
| 1004   | CDH6    | cadherin 6, type 2, K-cadherin (fetal kidney)                                            | 0.56158  | Yes | No  | No | No | No | No | No |
| 23567  | ZNF346  | zinc finger protein 346                                                                  | 0.561831 | Yes | No  | No | No | No | No | No |
| 5737   | PTGFR   | prostaglandin F receptor (FP)                                                            | 0.563148 | Yes | No  | No | No | No | No | No |
| 3880   | KRT19   | keratin 19                                                                               | 0.565938 | Yes | No  | No | No | No | No | No |
| 10520  | ZNF211  | zinc finger protein 211                                                                  | 0.567065 | Yes | No  | No | No | No | No | No |
| 6100   | RP9     | retinitis pigmentosa 9 (autosomal dominant)                                              | 0.569649 | Yes | No  | No | No | No | No | No |
| 57631  | LRCH2   | leucine-rich repeats and calponin homology (CH) domain containing 2                      | 0.570879 | Yes | No  | No | No | No | No | No |
| 30846  | EHD2    | EH-domain containing 2                                                                   | 0.573497 | Yes | No  | No | No | No | No | No |
| 219285 | SAMD9L  | sterile alpha motif domain containing 9-like                                             | 0.574022 | Yes | No  | No | No | No | No | No |
| 27035  | NOX1    | NADPH oxidase 1                                                                          | 0.575929 | Yes | No  | No | No | No | No | No |
| 491    | ATP2B2  | ATPase, Ca++ transporting, plasma membrane 2                                             | 0.576399 | Yes | No  | No | No | No | No | No |
| 342926 | ZNF677  | zinc finger protein 677                                                                  | 0.577571 | Yes | No  | No | No | No | No | No |
| 11314  | CD300A  | CD300a molecule                                                                          | 0.578206 | Yes | No  | No | No | No | No | No |
| 6280   | S100A9  | S100 calcium binding protein A9                                                          | 0.578834 | Yes | No  | No | No | No | No | No |
| 2675   | GFRA2   | GDNF family receptor alpha 2                                                             | 0.581077 | Yes | No  | No | No | No | No | No |
| 5025   | P2RX4   | purinergic receptor P2X, ligand-gated ion channel, 4                                     | 0.5857   | Yes | No  | No | No | No | No | No |
| 9628   | RGS6    | regulator of G-protein signaling 6                                                       | 0.594414 | Yes | No  | No | No | No | No | No |
| 10430  | TMEM147 | transmembrane protein 147                                                                | 0.594445 | Yes | Yes | No | No | No | No | No |
| 91624  | NEXN    | nexlin (F actin binding protein)                                                         | 0.594962 | Yes | No  | No | No | No | No | No |
| 51471  | NAT8B   | N-acetyltransferase 8B (gene/pseudogene)                                                 | 0.596896 | Yes | No  | No | No | No | No | No |
| 84514  | GHDC    | GH3 domain containing                                                                    | 0.598406 | Yes | No  | No | No | No | No | No |
| 60598  | KCNK15  | potassium channel, subfamily K, member 15                                                | 0.600407 | Yes | No  | No | No | No | No | No |
| 30012  | TLX3    | T-cell leukemia homeobox 3                                                               | 0.601501 | Yes | No  | No | No | No | No | No |
| 63904  | DUSP21  | dual specificity phosphatase 21                                                          | 0.604343 | Yes | No  | No | No | No | No | No |
| 51246  | SHISA5  | shisa homolog 5 (Xenopus laevis)                                                         | 0.605858 | Yes | No  | No | No | No | No | No |
| 4881   | NPR1    | natriuretic peptide receptor A/guanylate cyclase A (atrionatriuretic peptide receptor A) | 0.608054 | Yes | No  | No | No | No | No | No |
| 146861 | AMAC1   | acyl-malonyl condensing enzyme 1                                                         | 0.608165 | Yes | No  | No | No | No | No | No |
| 128338 | TMEM77  | transmembrane protein 77                                                                 | 0.61121  | Yes | No  | No | No | No | No | No |

|        |           |                                                                                 |          |     |     |    |    |    |     |    |
|--------|-----------|---------------------------------------------------------------------------------|----------|-----|-----|----|----|----|-----|----|
| 203447 | NRK       | Nrk related kinase                                                              | 0.613522 | Yes | No  | No | No | No | No  | No |
| 310    | ANXA7     | annexin A7                                                                      | 0.615947 | Yes | No  | No | No | No | No  | No |
| 29763  | PACSIN3   | protein kinase C and casein kinase substrate in neurons 3                       | 0.617936 | Yes | No  | No | No | No | No  | No |
| 9397   | NMT2      | N-myristoyltransferase 2                                                        | 0.622874 | Yes | No  | No | No | No | No  | No |
| 172    | AFG3L1    | AFG3 ATPase family gene 3-like 1 (S. cerevisiae)                                | 0.624989 | Yes | No  | No | No | No | No  | No |
| 1014   | CDH16     | cadherin 16, KSP-cadherin                                                       | 0.626195 | Yes | No  | No | No | No | No  | No |
| 4542   | MYO1F     | myosin IF                                                                       | 0.627466 | Yes | No  | No | No | No | No  | No |
| 5545   | PRB4      | proline-rich protein BtNI subfamily 4                                           | 0.628573 | Yes | No  | No | No | No | No  | No |
| 230    | ALDOC     | aldolase C, fructose-bisphosphate                                               | 0.628577 | Yes | No  | No | No | No | No  | No |
| 9401   | RECQL4    | RecQ protein-like 4                                                             | 0.633522 | No  | No  | No | No | No | Yes | No |
| 181    | AGRP      | agouti related protein homolog (mouse)                                          | 0.63384  | Yes | No  | No | No | No | No  | No |
| 27123  | DKK2      | dickkopf homolog 2 (Xenopus laevis)                                             | 0.635433 | No  | Yes | No | No | No | No  | No |
| 6300   | MAPK12    | mitogen-activated protein kinase 12                                             | 0.6445   | Yes | No  | No | No | No | No  | No |
| 64849  | SLC13A3   | solute carrier family 13 (sodium-dependent dicarboxylate transporter), member 3 | 0.644573 | Yes | No  | No | No | No | No  | No |
| 955    | ENTPD6    | ectonucleoside triphosphate diphosphohydrolase 6 (putative function)            | 0.647645 | Yes | No  | No | No | No | No  | No |
| 3950   | LECT2     | leukocyte cell-derived chemotaxin 2                                             | 0.64819  | Yes | No  | No | No | No | No  | No |
| 23432  | GPR161    | G protein-coupled receptor 161                                                  | 0.650882 | Yes | No  | No | No | No | No  | No |
| 946    | SIGLEC6   | sialic acid binding Ig-like lectin 6                                            | 0.653828 | Yes | No  | No | No | No | No  | No |
| 27241  | BBS9      | Bardet-Biedl syndrome 9                                                         | 0.654577 | Yes | No  | No | No | No | No  | No |
| 3816   | KLK1      | kallikrein 1                                                                    | 0.655151 | Yes | No  | No | No | No | No  | No |
| 353274 | ZNF445    | zinc finger protein 445                                                         | 0.655167 | No  | No  | No | No | No | Yes | No |
| 1268   | CNR1      | cannabinoid receptor 1 (brain)                                                  | 0.661465 | Yes | No  | No | No | No | No  | No |
| 5361   | PLXNA1    | plexin A1                                                                       | 0.666714 | Yes | No  | No | No | No | No  | No |
| 2877   | GPX2      | glutathione peroxidase 2 (gastrointestinal)                                     | 0.669442 | Yes | No  | No | No | No | No  | No |
| 130574 | LYPD6     | LY6/PLAUR domain containing 6                                                   | 0.669449 | Yes | No  | No | No | No | No  | No |
| 11156  | PTP4A3    | protein tyrosine phosphatase type IVA, member 3                                 | 0.671501 | Yes | No  | No | No | No | No  | No |
| 54363  | HAO1      | hydroxyacid oxidase (glycolate oxidase) 1                                       | 0.672647 | Yes | No  | No | No | No | No  | No |
| 10272  | FSTL3     | folistatin-like 3 (secreted glycoprotein)                                       | 0.675645 | No  | No  | No | No | No | Yes | No |
| 541469 | LOC541469 | hypothetical protein LOC541469                                                  | 0.676104 | Yes | No  | No | No | No | No  | No |
| 54813  | KLHL28    | kelch-like 28 (Drosophila)                                                      | 0.678228 | Yes | No  | No | No | No | No  | No |
| 10467  | ZNHIT1    | zinc finger, HIT type 1                                                         | 0.681335 | No  | No  | No | No | No | Yes | No |
| 6036   | RNASE2    | ribonuclease, RNase A family, 2 (liver, eosinophil-derived neurotoxin)          | 0.685012 | Yes | No  | No | No | No | No  | No |
| 56917  | MEIS3     | Meis homeobox 3                                                                 | 0.685112 | Yes | No  | No | No | No | No  | No |
| 114904 | C1QTNF6   | C1q and tumor necrosis factor related protein 6                                 | 0.686506 | Yes | No  | No | No | No | Yes | No |

|        |           |                                                                                   |          |     |     |    |    |    |     |    |    |
|--------|-----------|-----------------------------------------------------------------------------------|----------|-----|-----|----|----|----|-----|----|----|
| 51493  | C2orf28   | chromosome 22 open reading frame 28                                               | 0.687054 | Yes | No  | No | No | No | No  | No | No |
| 284402 | LOC284402 | hypothetical protein LOC284402                                                    | 0.689033 | Yes | No  | No | No | No | No  | No | No |
| 866    | SERPINA6  | serpin peptidase inhibitor, clade A (alpha-1 antitrypsin), member 6               | 0.689097 | Yes | No  | No | No | No | No  | No | No |
| 26232  | FBXO2     | F-box protein 2                                                                   | 0.689695 | Yes | No  | No | No | No | No  | No | No |
| 49855  | SCAPER    | S phase cyclin A-associated protein in the ER                                     | 0.690669 | Yes | No  | No | No | No | No  | No | No |
| 10964  | IFI44L    | interferon-induced protein 44-like                                                | 0.69417  | Yes | Yes | No | No | No | No  | No | No |
| 8829   | NRP1      | neuropilin 1                                                                      | 0.69426  | Yes | No  | No | No | No | No  | No | No |
| 5269   | SERPINB6  | serpin peptidase inhibitor, clade B (ovalbumin), member 6                         | 0.695287 | Yes | No  | No | No | No | No  | No | No |
| 3177   | SLC29A2   | solute carrier family 29 (nucleoside transporters), member 2                      | 0.697345 | Yes | Yes | No | No | No | No  | No | No |
| 23516  | SLC39A14  | solute carrier family 39 (zinc transporter), member 14                            | 0.69941  | Yes | No  | No | No | No | No  | No | No |
| 51171  | HSD17B14  | hydroxysteroid (17-beta) dehydrogenase 14                                         | 0.70322  | Yes | No  | No | No | No | No  | No | No |
| 8302   | KLRC4     | killer cell lectin-like receptor subfamily C, member 4                            | 0.703488 | Yes | No  | No | No | No | No  | No | No |
| 84914  | ZNF587    | zinc finger protein 587                                                           | 0.705733 | Yes | No  | No | No | No | No  | No | No |
| 10336  | PCGF3     | polycomb group ring finger 3                                                      | 0.707346 | Yes | No  | No | No | No | No  | No | No |
| 6943   | TCF21     | transcription factor 21                                                           | 0.709706 | Yes | No  | No | No | No | No  | No | No |
| 79014  | C16orf67  | chromosome 16 open reading frame 67                                               | 0.71235  | Yes | No  | No | No | No | No  | No | No |
| 7111   | TMOD1     | tropomodulin 1                                                                    | 0.713341 | Yes | Yes | No | No | No | No  | No | No |
| 1395   | CRHR2     | corticotropin releasing hormone receptor 2                                        | 0.720474 | Yes | No  | No | No | No | No  | No | No |
| 2323   | FLT3LG    | fms-related tyrosine kinase 3 ligand                                              | 0.720722 | Yes | No  | No | No | No | No  | No | No |
| 7305   | TYROBP    | TYRO protein tyrosine kinase binding protein                                      | 0.723397 | Yes | No  | No | No | No | Yes | No | No |
| 27177  | IL1F8     | interleukin 1 family, member 8 (eta)                                              | 0.725853 | Yes | No  | No | No | No | No  | No | No |
| 54600  | UGT1A9    | UDP glucuronosyltransferase 1 family, polypeptide A9                              | 0.730087 | Yes | No  | No | No | No | No  | No | No |
| 1346   | COX7A1    | cytochrome c oxidase subunit VIIa polypeptide 1 (muscle)                          | 0.730251 | Yes | No  | No | No | No | No  | No | No |
| 23275  | POFUT2    | protein O-fucosyltransferase 2                                                    | 0.730366 | No  | Yes | No | No | No | No  | No | No |
| 8460   | TPST1     | tyrosylprotein sulfotransferase 1                                                 | 0.730821 | Yes | No  | No | No | No | No  | No | No |
| 27434  | POLM      | polymerase (DNA directed), mu                                                     | 0.732111 | Yes | No  | No | No | No | No  | No | No |
| 51148  | CERCAM    | cerebral endothelial cell adhesion molecule                                       | 0.733301 | Yes | No  | No | No | No | No  | No | No |
| 3855   | KRT7      | keratin 7                                                                         | 0.733306 | Yes | No  | No | No | No | No  | No | No |
| 1296   | COL8A2    | collagen, type VIII, alpha 2                                                      | 0.734673 | Yes | No  | No | No | No | No  | No | No |
| 25794  | FSCN2     | fascin homolog 2, actin-bundling protein, retinal (Strongylocentrotus purpuratus) | 0.734916 | Yes | No  | No | No | No | No  | No | No |
| 200420 | ALMS1P    | Alstrom syndrome 1 pseudogene                                                     | 0.735769 | Yes | No  | No | No | No | No  | No | No |
| 9027   | NAT8      | N-acetyltransferase 8                                                             | 0.735769 | Yes | No  | No | No | No | No  | No | No |
| 80339  | PNPLA3    | patatin-like phospholipase domain containing 3                                    | 0.735813 | Yes | No  | No | No | No | No  | No | No |
| 284443 | ZNF493    | zinc finger protein 493                                                           | 0.737139 | Yes | No  | No | No | No | No  | No | No |



|        |          |                                                                     |          |     |     |    |    |    |     |    |    |
|--------|----------|---------------------------------------------------------------------|----------|-----|-----|----|----|----|-----|----|----|
| 81844  | TRIM56   | tripartite motif-containing 56                                      | 0.738905 | Yes | No  | No | No | No | No  | No | No |
| 23214  | XPO6     | exportin 6                                                          | 0.744117 | Yes | No  | No | No | No | No  | No | No |
| 7730   | ZNF177   | zinc finger protein 177                                             | 0.747598 | Yes | No  | No | No | No | No  | No | No |
| 65095  | KRI1     | KRI1 homolog (S. cerevisiae)                                        | 0.749042 | Yes | No  | No | No | No | No  | No | No |
| 51559  | NT5DC3   | 5'-nucleotidase domain containing 3                                 | 0.751573 | Yes | No  | No | No | No | No  | No | No |
| 55211  | DPPA4    | developmental pluripotency associated 4                             | 0.756682 | Yes | No  | No | No | No | No  | No | No |
| 84220  | RGPD5    | RANBP2-like and GRIP domain containing 5                            | 0.757136 | Yes | No  | No | No | No | No  | No | No |
| 57156  | TMEM63C  | transmembrane protein 63C                                           | 0.758184 | No  | No  | No | No | No | Yes | No | No |
| 129530 | LYG1     | lysozyme G-like 1                                                   | 0.759942 | Yes | No  | No | No | No | No  | No | No |
| 9569   | GTF2IRD1 | GTF2I repeat domain containing 1                                    | 0.760899 | Yes | No  | No | No | No | No  | No | No |
| 161725 | OTUD7A   | OTU domain containing 7A                                            | 0.761997 | Yes | No  | No | No | No | No  | No | No |
| 3294   | HSD17B2  | hydroxysteroid (17-beta) dehydrogenase 2                            | 0.763638 | Yes | No  | No | No | No | No  | No | No |
| 163782 | KANK4    | KN motif and ankyrin repeat domains 4                               | 0.766867 | Yes | No  | No | No | No | No  | No | No |
| 374393 | FAM111B  | family with sequence similarity 111, member B                       | 0.766834 | No  | Yes | No | No | No | No  | No | No |
| 8225   | GTPBP6   | GTP binding protein 6 (putative)                                    | 0.77283  | Yes | No  | No | No | No | No  | No | No |
| 10068  | IL18BP   | interleukin 18 binding protein                                      | 0.77504  | Yes | No  | No | No | No | No  | No | No |
| 117194 | MRGPRX2  | MAS-related GPR, member X2                                          | 0.777793 | Yes | No  | No | No | No | No  | No | No |
| 1668   | DEFA3    | defensin, alpha 3, neutrophil-specific                              | 0.778392 | Yes | No  | No | No | No | No  | No | No |
| 400077 | FLJ42957 | FLJ42957 protein                                                    | 0.779216 | Yes | No  | No | No | No | No  | No | No |
| 57178  | ZMI21    | zinc finger, MIZ-type containing 1                                  | 0.780246 | Yes | No  | No | No | No | No  | No | No |
| 8722   | CTSF     | cathepsin F                                                         | 0.785395 | Yes | No  | No | No | No | No  | No | No |
| 5228   | PGF      | placental growth factor                                             | 0.785995 | Yes | No  | No | No | No | No  | No | No |
| 7780   | SLC30A2  | solute carrier family 30 (zinc transporter), member 2               | 0.786516 | Yes | No  | No | No | No | No  | No | No |
| 4496   | MT1H     | metallothionein 1H                                                  | 0.787904 | Yes | No  | No | No | No | No  | No | No |
| 27166  | PRELID1  | PRELI domain containing 1                                           | 0.788439 | No  | No  | No | No | No | Yes | No | No |
| 43847  | KLK14    | kallikrein-related peptidase 14                                     | 0.792594 | Yes | No  | No | No | No | No  | No | No |
| 11230  | PRAF2    | PRA1 domain family, member 2                                        | 0.792917 | Yes | No  | No | No | No | No  | No | No |
| 23255  | KIAA0802 | KIAA0802                                                            | 0.793976 | Yes | No  | No | No | No | No  | No | No |
| 10017  | BCL2L10  | BCL2-like 10 (apoptosis facilitator)                                | 0.799774 | Yes | No  | No | No | No | No  | No | No |
| 515    | ATP5F1   | ATP synthase, H+ transporting, mitochondrial F0 complex, subunit B1 | 0.802388 | Yes | No  | No | No | No | No  | No | No |
| 116447 | TOP1MT   | topoisomerase (DNA) I, mitochondrial                                | 0.802415 | Yes | No  | No | No | No | No  | No | No |
| 8294   | HIST1H4I | histone cluster 1, H4I                                              | 0.806642 | No  | Yes | No | No | No | Yes | No | No |
| 147968 | CAPN12   | calpain 12                                                          | 0.808009 | Yes | No  | No | No | No | No  | No | No |
| 64784  | CRTC3    | CREB regulated transcription coactivator 3                          | 0.811364 | Yes | No  | No | No | No | No  | No | No |

|        |          |                                                                                                |          |     |     |    |    |    |     |    |    |
|--------|----------|------------------------------------------------------------------------------------------------|----------|-----|-----|----|----|----|-----|----|----|
| 124565 | SLC38A10 | solute carrier family 38, member 10                                                            | 0.814602 | Yes | No  | No | No | No | No  | No | No |
| 152940 | FLJ25371 | hypothetical protein FLJ25371                                                                  | 0.820088 | Yes | No  | No | No | No | No  | No | No |
| 6837   | MED22    | mediator complex subunit 22                                                                    | 0.825557 | Yes | No  | No | No | No | No  | No | No |
| 1990   | ELA1     | elastase 1, pancreatic                                                                         | 0.827561 | Yes | No  | No | No | No | No  | No | No |
| 113    | ADCY7    | adenylate cyclase 7                                                                            | 0.828773 | Yes | No  | No | No | No | No  | No | No |
| 2328   | FMO3     | flavin containing monooxygenase 3                                                              | 0.830202 | Yes | No  | No | No | No | No  | No | No |
| 54497  | HEATR5B  | HEAT repeat containing 5B                                                                      | 0.831654 | Yes | No  | No | No | No | No  | No | No |
| 2865   | FFAR3    | free fatty acid receptor 3                                                                     | 0.833557 | Yes | No  | No | No | No | No  | No | No |
| 11155  | LDB3     | LIM domain binding 3                                                                           | 0.833593 | Yes | No  | No | No | No | No  | No | No |
| 7180   | CRISP2   | cysteine-rich secretory protein 2                                                              | 0.836246 | Yes | No  | No | No | No | No  | No | No |
| 4097   | MAFG     | v-maf musculoaponeurotic fibrosarcoma oncogene homolog G (avian)                               | 0.839852 | Yes | No  | No | No | No | No  | No | No |
| 5098   | PCDHGC3  | protocadherin gamma subfamily C, 3                                                             | 0.839971 | No  | No  | No | No | No | Yes | No | No |
| 146956 | EME1     | essential meiotic endonuclease 1 homolog 1 (S. pombe)                                          | 0.843389 | No  | No  | No | No | No | Yes | No | No |
| 283948 | FLJ36208 | hypothetical protein FLJ36208                                                                  | 0.844005 | No  | Yes | No | No | No | No  | No | No |
| 25823  | TPSG1    | trypsin gamma 1                                                                                | 0.844279 | Yes | No  | No | No | No | No  | No | No |
| 53905  | DUOX1    | dual oxidase 1                                                                                 | 0.844682 | Yes | No  | No | No | No | No  | No | No |
| 128637 | TBC1D20  | TBC1 domain family, member 20                                                                  | 0.845787 | Yes | No  | No | No | No | No  | No | No |
| 5829   | PXN      | paxillin                                                                                       | 0.849897 | Yes | No  | No | No | No | No  | No | No |
| 55224  | ETNK2    | ethanolamine kinase 2                                                                          | 0.852872 | Yes | No  | No | No | No | No  | No | No |
| 3640   | INSL3    | insulin-like 3 (Leydig cell)                                                                   | 0.854335 | Yes | No  | No | No | No | No  | No | No |
| 945    | CD33     | CD33 molecule                                                                                  | 0.857421 | Yes | No  | No | No | No | No  | No | No |
| 10297  | APC2     | adenomatous polyposis coli 2                                                                   | 0.858603 | Yes | No  | No | No | No | No  | No | No |
| 200010 | SLC5A9   | solute carrier family 5 (sodium/glucose cotransporter), member 9                               | 0.860629 | Yes | No  | No | No | No | No  | No | No |
| 10053  | AP1M2    | adaptor-related protein complex 1, mu 2 subunit                                                | 0.863399 | Yes | No  | No | No | No | No  | No | No |
| 84839  | RAX2     | retina and anterior neural fold homeobox 2                                                     | 0.863614 | Yes | No  | No | No | No | No  | No | No |
| 64582  | GPR135   | G protein-coupled receptor 135                                                                 | 0.86758  | Yes | No  | No | No | No | No  | No | No |
| 51298  | THEG     | Theg homolog (mouse)                                                                           | 0.869414 | Yes | No  | No | No | No | No  | No | No |
| 4759   | NEU2     | sialidase 2 (cytosolic sialidase)                                                              | 0.872426 | Yes | No  | No | No | No | No  | No | No |
| 7455   | ZAN      | zonadhesin                                                                                     | 0.876972 | Yes | No  | No | No | No | No  | No | No |
| 10398  | MYL9     | myosin, light chain 9, regulatory                                                              | 0.877701 | Yes | No  | No | No | No | No  | No | No |
| 8839   | WISP2    | WNT1 inducible signaling pathway protein 2                                                     | 0.877864 | Yes | No  | No | No | No | No  | No | No |
| 162461 | TMEM92   | transmembrane protein 92                                                                       | 0.887179 | Yes | No  | No | No | No | No  | No | No |
| 2589   | GALNT1   | UDP-N-acetyl-alpha-D-galactosamine:polypeptide N-acetylgalactosaminyltransferase 1 (GalNAc-T1) | 0.889961 | Yes | Yes | No | No | No | No  | No | No |
| 7789   | ZXDA     | zinc finger, X-linked, duplicated A                                                            | 0.891082 | Yes | No  | No | No | No | No  | No | No |

|        |         |                                                                                                 |          |     |     |    |    |    |     |    |    |
|--------|---------|-------------------------------------------------------------------------------------------------|----------|-----|-----|----|----|----|-----|----|----|
| 5260   | PHKG1   | phosphorylase kinase, gamma 1 (muscle)                                                          | 0.892381 | Yes | No  | No | No | No | No  | No | No |
| 26086  | GPSM1   | G-protein signaling modulator 1 (AGS3-like, C. elegans)                                         | 0.893831 | Yes | No  | No | No | No | No  | No | No |
| 115811 | IQCD    | IQ motif containing D                                                                           | 0.896948 | No  | No  | No | No | No | Yes | No | No |
| 90233  | ZNF551  | zinc finger protein 551                                                                         | 0.897979 | Yes | No  | No | No | No | No  | No | No |
| 200958 | MUC20   | mucin 20, cell surface associated                                                               | 0.898007 | Yes | No  | No | No | No | No  | No | No |
| 79698  | ZMAT4   | zinc finger, matrix type 4                                                                      | 0.89842  | No  | Yes | No | No | No | No  | No | No |
| 3384   | ICAM2   | intercellular adhesion molecule 2                                                               | 0.899078 | Yes | No  | No | No | No | No  | No | No |
| 84518  | CNFN    | cornifelin                                                                                      | 0.900218 | Yes | No  | No | No | No | No  | No | No |
| 2866   | GPR42P  | G protein-coupled receptor 42 pseudogene                                                        | 0.902043 | Yes | No  | No | No | No | No  | No | No |
| 85329  | LGALS12 | lectin, galactoside-binding, soluble, 12 (galectin 12)                                          | 0.904544 | Yes | No  | No | No | No | No  | No | No |
| 10581  | IFITM2  | interferon induced transmembrane protein 2 (1-8D)                                               | 0.906036 | Yes | No  | No | No | No | No  | No | No |
| 6277   | S100A6  | S100 calcium binding protein A6                                                                 | 0.907232 | Yes | No  | No | No | No | No  | No | No |
| 10578  | GNLY    | granulysin                                                                                      | 0.909998 | Yes | No  | No | No | No | No  | No | No |
| 6273   | S100A2  | S100 calcium binding protein A2                                                                 | 0.91199  | Yes | No  | No | No | No | No  | No | No |
| 3316   | HSPB2   | heat shock 27kDa protein 2                                                                      | 0.914713 | Yes | No  | No | No | No | No  | No | No |
| 1861   | TOR1A   | torsin family 1, member A (torsin A)                                                            | 0.915697 | Yes | No  | No | No | No | No  | No | No |
| 200008 | CDCP2   | CUB domain containing protein 2                                                                 | 0.918728 | Yes | No  | No | No | No | No  | No | No |
| 9629   | CLCA3   | chloride channel, calcium activated, family member 3                                            | 0.922068 | Yes | No  | No | No | No | No  | No | No |
| 8857   | FCGBP   | Fc fragment of IgG binding protein                                                              | 0.923108 | Yes | No  | No | No | No | No  | No | No |
| 8572   | PDLIM4  | PDZ and LIM domain 4                                                                            | 0.925788 | Yes | No  | No | No | No | No  | No | No |
| 56477  | CCL28   | chemokine (C-C motif) ligand 28                                                                 | 0.926153 | Yes | No  | No | No | No | No  | No | No |
| 8677   | STX10   | syntaxin 10                                                                                     | 0.926739 | No  | No  | No | No | No | Yes | No | No |
| 57053  | CHRNA10 | cholinergic receptor, nicotinic, alpha 10                                                       | 0.926742 | Yes | No  | No | No | No | No  | No | No |
| 1951   | CELSR3  | cadherin, EGF LAG seven-pass G-type receptor 3 (flamingo homolog, Drosophila)                   | 0.928214 | Yes | No  | No | No | No | No  | No | No |
| 3957   | LGALS2  | lectin, galactoside-binding, soluble, 2                                                         | 0.928753 | Yes | No  | No | No | No | No  | No | No |
| 64096  | GFRA4   | GDNF family receptor alpha 4                                                                    | 0.929715 | Yes | No  | No | No | No | No  | No | No |
| 27085  | MTBP    | Mdm2, transformed 3T3 cell double minute 2, p53 binding protein (mouse) binding protein, 104kDa | 0.931469 | Yes | No  | No | No | No | Yes | No | No |
| 150290 | DUSP18  | dual specificity phosphatase 18                                                                 | 0.931658 | Yes | No  | No | No | No | No  | No | No |
| 26260  | FBXO25  | F-box protein 25                                                                                | 0.93282  | Yes | No  | No | No | No | No  | No | No |
| 201191 | SAMD14  | sterile alpha motif domain containing 14                                                        | 0.934016 | Yes | No  | No | No | No | No  | No | No |
| 27037  | HTF9C   | HpaII tiny fragments locus 9C                                                                   | 0.934638 | Yes | No  | No | No | No | No  | No | No |
| 158947 | ARMCX4  | armadillo repeat containing, X-linked 4                                                         | 0.938659 | Yes | No  | No | No | No | No  | No | No |
| 256691 | MAMDC2  | MAM domain containing 2                                                                         | 0.940434 | Yes | No  | No | No | No | No  | No | No |
| 1629   | DBT     | dihydroipoamide branched chain transacylase E2                                                  | 0.94138  | Yes | No  | No | No | No | No  | No | No |



|        |           |                                                                                          |          |     |     |    |    |    |     |    |    |
|--------|-----------|------------------------------------------------------------------------------------------|----------|-----|-----|----|----|----|-----|----|----|
| 6195   | RPS6KA1   | ribosomal protein S6 kinase, 90kDa, polypeptide 1                                        | 0.990684 | Yes | No  | No | No | No | No  | No | No |
| 3959   | LGALS3BP  | lectin, galactoside-binding, soluble, 3 binding protein                                  | 0.990838 | Yes | No  | No | No | No | No  | No | No |
| 115294 | PCMTD1    | protein-L-isoaspartate (D-aspartate) O-methyltransferase domain containing 1             | 0.99088  | Yes | No  | No | No | No | No  | No | No |
| 6367   | CCL22     | chemokine (C-C motif) ligand 22                                                          | 0.993215 | Yes | No  | No | No | No | No  | No | No |
| 4057   | LTF       | lactotransferrin                                                                         | 0.994124 | Yes | No  | No | No | No | No  | No | No |
| 140625 | ACTRT2    | actin-related protein T2                                                                 | 0.994554 | Yes | No  | No | No | No | No  | No | No |
| 57644  | MYH7B     | myosin, heavy chain 7B, cardiac muscle, beta                                             | 0.995974 | Yes | No  | No | No | No | No  | No | No |
| 3421   | IDH3G     | isocitrate dehydrogenase 3 (NAD+) gamma                                                  | 0.996299 | Yes | No  | No | No | No | No  | No | No |
| 84000  | TMPRSS13  | transmembrane protease, serine 13                                                        | 0.996905 | Yes | No  | No | No | No | No  | No | No |
| 55876  | GSDML     | gasdermin-like                                                                           | 0.997025 | Yes | No  | No | No | No | No  | No | No |
| 196463 | P76       | mannose-6-phosphate protein p76                                                          | 0.997484 | Yes | No  | No | No | No | No  | No | No |
| 4352   | MPL       | myeloproliferative leukemia virus oncogene                                               | 0.997886 | Yes | No  | No | No | No | No  | No | No |
| 6370   | CCL25     | chemokine (C-C motif) ligand 25                                                          | 0.999043 | Yes | No  | No | No | No | No  | No | No |
| 400451 | FAM174B   | family with sequence similarity 174, member B                                            | 0.99939  | Yes | No  | No | No | No | No  | No | No |
| 10107  | TRIM10    | tripartite motif-containing 10                                                           | 0.999852 | Yes | No  | No | No | No | No  | No | No |
| 1455   | CSNK1G2   | casein kinase 1, gamma 2                                                                 | 1.00033  | Yes | No  | No | No | No | No  | No | No |
| 140710 | C20orf117 | chromosome 20 open reading frame 117                                                     | 1.00091  | NA* | Yes | No | No | No | No  | No | No |
| 118738 | ZNF488    | zinc finger protein 488                                                                  | 1.00113  | Yes | No  | No | No | No | No  | No | No |
| 3373   | HYAL1     | hyaluronoglucosaminidase 1                                                               | 1.00113  | Yes | No  | No | No | No | No  | No | No |
| 89848  | FCHSD1    | FCH and double SH3 domains 1                                                             | 1.00155  | Yes | No  | No | No | No | No  | No | No |
| 389763 | FLJ46321  | FLJ46321 protein                                                                         | 1.00233  | Yes | No  | No | No | No | No  | No | No |
| 7138   | TNNT1     | troponin T type 1 (skeletal, slow)                                                       | 1.00236  | Yes | No  | No | No | No | No  | No | No |
| 10004  | NAALADL1  | N-acetylated alpha-linked acidic dipeptidase-like 1                                      | 1.00245  | Yes | No  | No | No | No | No  | No | No |
| 201931 | TMEM192   | transmembrane protein 192                                                                | 1.00255  | Yes | No  | No | No | No | No  | No | No |
| 8859   | STK19     | serine/threonine kinase 19                                                               | 1.0035   | Yes | No  | No | No | No | No  | No | No |
| 3263   | HPX       | hemopexin                                                                                | 1.00369  | Yes | No  | No | No | No | No  | No | No |
| 6911   | TBX6      | T-box 6                                                                                  | 1.00369  | No  | No  | No | No | No | Yes | No | No |
| 6742   | SSBP1     | single-stranded DNA binding protein 1                                                    | 1.00373  | Yes | No  | No | No | No | Yes | No | No |
| 83697  | SLC4A9    | solute carrier family 4, sodium bicarbonate cotransporter, member 9                      | 1.00378  | Yes | No  | No | No | No | No  | No | No |
| 79958  | DENND1C   | DENN/MADD domain containing 1C                                                           | 1.00441  | Yes | No  | No | No | No | No  | No | No |
| 10990  | LILRB5    | leukocyte immunoglobulin-like receptor, subfamily B (with TM and ITIM domains), member 5 | 1.00491  | Yes | No  | No | No | No | No  | No | No |
| 3554   | IL1R1     | interleukin 1 receptor, type 1                                                           | 1.00505  | Yes | No  | No | No | No | No  | No | No |
| 1805   | DPT       | dermatopontin                                                                            | 1.00522  | Yes | No  | No | No | No | No  | No | No |
| 64848  | YTHDC2    | YTH domain containing 2                                                                  | 1.00533  | No  | Yes | No | No | No | No  | No | No |

|        |          |                                                                |         |     |    |    |    |    |     |    |
|--------|----------|----------------------------------------------------------------|---------|-----|----|----|----|----|-----|----|
| 6991   | TCTE3    | t-complex-associated-testis-expressed 3                        | 1.00537 | No  | No | No | No | No | Yes | No |
| 4493   | MT1E     | metallothionein 1E                                             | 1.00542 | Yes | No | No | No | No | No  | No |
| 167410 | LIX1     | Lix1 homolog (chicken)                                         | 1.0057  | Yes | No | No | No | No | No  | No |
| 285464 | CRIPAK   | cysteine-rich PAK1 inhibitor                                   | 1.00574 | Yes | No | No | No | No | No  | No |
| 148156 | ZNF558   | zinc finger protein 558                                        | 1.00578 | Yes | No | No | No | No | No  | No |
| 1018   | CDK3     | cyclin-dependent kinase 3                                      | 1.00578 | Yes | No | No | No | No | No  | No |
| 9904   | RBM19    | RNA binding motif protein 19                                   | 1.00581 | Yes | No | No | No | No | No  | No |
| 4992   | OR1F1    | olfactory receptor, family 1, subfamily F, member 1            | 1.00582 | Yes | No | No | No | No | No  | No |
| 132954 | PDCL2    | phosducin-like 2                                               | 1.0059  | Yes | No | No | No | No | No  | No |
| 26119  | LDLRAP1  | low density lipoprotein receptor adaptor protein 1             | 1.0059  | Yes | No | No | No | No | No  | No |
| 6737   | TRIM21   | tripartite motif-containing 21                                 | 1.00596 | Yes | No | No | No | No | No  | No |
| 5920   | RARRES3  | retinoic acid receptor responder (tazarotene induced) 3        | 1.006   | Yes | No | No | No | No | No  | No |
| 83483  | PLVAP    | plasmalemma vesicle associated protein                         | 1.00604 | Yes | No | No | No | No | No  | No |
| 29952  | DPP7     | dipeptidyl-peptidase 7                                         | 1.00605 | Yes | No | No | No | No | No  | No |
| 84197  | FLJ23356 | hypothetical protein FLJ23356                                  | 1.00608 | No  | No | No | No | No | Yes | No |
| 283150 | FOXR1    | forkhead box R1                                                | 1.00609 | Yes | No | No | No | No | No  | No |
| 3572   | IL6ST    | interleukin 6 signal transducer (gp130, oncostatin M receptor) | 1.00623 | Yes | No | No | No | No | No  | No |
| 27293  | SMPDL3B  | sphingomyelin phosphodiesterase, acid-like 3B                  | 1.00628 | Yes | No | No | No | No | No  | No |

**Note:** NA\*=These genes were omitted from differential expression calculations due to disagreement between Affymetrix probe annotation and the up-to-date AffyProbeMiner annotation.
