# Supplementary material
Source: PubMed Central journal article supplement (PMC2817639)
Supplement: blood-2009-06-227017_4.pdf [file blood-2009-06-227017_4.pdf]

| Category        | Term                                                                        | Count | PValue   | Benjamini | Genes                                                                                                                                                                                           |
|-----------------|-----------------------------------------------------------------------------|-------|----------|-----------|-------------------------------------------------------------------------------------------------------------------------------------------------------------------------------------------------|
| KEGG_PATHWAY    | Apoptosis                                                                   | 16    | 1.81E-03 | 0.34      | 5534, 596, 8795, 4792, 8743, 4790, 8717, 841, 5530, 4791, 331, 472, 5567, 4615, 8793, 8837,                                                                                                     |
| KEGG_PATHWAY    | Toll-like receptor signaling pathway                                        | 18    | 1.96E-03 | 0.2       | 3454, 23118, 23643, 114609, 5594, 3725, 4792, 4790, 3665, 841, 51284, 6772, 3455, 4791, 6373, 4615, 54106, 7096,                                                                                |
| KEGG_PATHWAY    | Leukocyte transendothelial migration                                        | 19    | 2.20E-03 | 0.16      | 4478, 10451, 81, 58494, 29895, 3676, 3383, 4688, 51208, 10627, 394, 1495, 3684, 50848, 83593, 6093, 1500, 4267, 90952,                                                                          |
| KEGG_PATHWAY    | Jak-STAT signaling pathway                                                  | 23    | 2.65E-03 | 0.14      | 3454, 1154, 894, 10252, 3459, 3587, 5777, 9063, 3588, 6774, 3575, 3570, 6772, 6776, 3455, 3718, 81848, 3594, 23529, 3561, 1438, 3597, 4609,                                                     |
| BIOCARTA        | Rho cell motility signaling pathway                                         | 8     | 4.31E-03 | 0.75      | 394, 6714, 1729, 4660, 9138, 392, 7094, 2934,                                                                                                                                                   |
| KEGG_PATHWAY    | Epithelial cell signaling in Helicobacter pylori infection                  | 13    | 5.74E-03 | 0.23      | 535, 58494, 6714, 3725, 4792, 4790, 51606, 2919, 8992, 4067, 4791, 10392, 50848,                                                                                                                |
| KEGG_PATHWAY    | MAPK signaling pathway                                                      | 32    | 6.87E-03 | 0.23      | 23118, 6237, 5594, 5922, 4790, 4215, 1847, 4217, 4197, 3727, 10369, 1843, 782, 9175, 4609, 5534, 5607, 1846, 3725, 409, 6789, 7048, 5530, 5613, 4791, 4208, 1849, 9252, 5495, 5567, 1848, 7867, |
| KEGG_PATHWAY    | B cell receptor signaling pathway                                           | 12    | 6.90E-03 | 0.2       | 10451, 5534, 3635, 5530, 971, 4067, 4791, 4792, 3725, 4790, 4794, 5777,                                                                                                                         |
| KEGG_PATHWAY    | Adherens junction                                                           | 13    | 1.01E-02 | 0.25      | 81, 7525, 51176, 5818, 5770, 5594, 6714, 5777, 7048, 1495, 10163, 6934, 1500,                                                                                                                   |
| BIOCARTA        | Neuropeptides VIP and PACAP inhibit the apoptosis of activated T cells      | 6     | 1.04E-02 | 0.82      | 1960, 5530, 2776, 4792, 4790, 4609,                                                                                                                                                             |
| KEGG_PATHWAY    | Circadian rhythm                                                            | 5     | 1.42E-02 | 0.31      | 1407, 9575, 79365, 406, 4862,                                                                                                                                                                   |
| BIOCARTA        | Toll-Like Receptor Pathway                                                  | 9     | 1.77E-02 | 0.86      | 23118, 51284, 23643, 114609, 4792, 3725, 4790, 4615, 54106,                                                                                                                                     |
| KEGG_PATHWAY    | Adipocytokine signaling pathway                                             | 12    | 2.26E-02 | 0.41      | 2181, 6774, 3718, 2180, 7133, 4791, 4792, 4790, 4794, 5106, 5562, 8717,                                                                                                                         |
| KEGG_PATHWAY    | Acute myeloid leukemia                                                      | 10    | 2.31E-02 | 0.39      | 6774, 6776, 51176, 5594, 5914, 4791, 4790, 6934, 5467, 4609,                                                                                                                                    |
| KEGG_PATHWAY    | Wnt signaling pathway                                                       | 19    | 3.01E-02 | 0.44      | 8312, 5534, 894, 51176, 80319, 8325, 5330, 8322, 3725, 4040, 5530, 5613, 817, 6477, 6934, 5567, 5467, 6093, 4609,                                                                               |
| BIOCARTA        | MAPKinase Signaling Pathway                                                 | 14    | 3.39E-02 | 0.94      | 5594, 5607, 4205, 3725, 4792, 4790, 4215, 8717, 4217, 4296, 9252, 9175, 7867, 4609,                                                                                                             |
| BIOCARTA        | IL-7 Signal Transduction                                                    | 5     | 3.83E-02 | 0.92      | 3575, 6776, 3718, 596, 3561,                                                                                                                                                                    |
| BIOCARTA        | Induction of apoptosis through DR3 and DR4/5 Death Receptors                | 7     | 3.86E-02 | 0.88      | 841, 596, 4792, 8743, 4790, 8717, 8837,                                                                                                                                                         |
| BIOCARTA        | Ceramide Signaling Pathway                                                  | 6     | 4.42E-02 | 0.84      | 841, 5594, 596, 4790, 6609, 8717,                                                                                                                                                               |
| BIOCARTA        | Erk and PI-3 Kinase Are Necessary for Collagen Binding in Corneal Epithelia | 6     | 4.42E-02 | 0.84      | 5594, 394, 6714, 1729, 7094, 2934,                                                                                                                                                              |
| PANTHER_PATHWAY | Apoptosis_signaling_pathway                                                 | 7     | 4.65E-02 | 0.98      | 4217, 7133, 4792, 3725, 8743, 331, 8837,                                                                                                                                                        |
| BIOCARTA        | IL22 Soluble Receptor Signaling Pathway                                     | 4     | 4.76E-02 | 0.83      | 6774, 6776, 3718, 3587,                                                                                                                                                                         |
| BIOCARTA        | Cadmium induces DNA synthesis and proliferation in macrophages              | 5     | 4.85E-02 | 0.8       | 5594, 4792, 3725, 4790, 4609,                                                                                                                                                                   |
