# Supplementary material
Source: PubMed Central journal article supplement (PMC2817639)
Supplement: blood-2009-06-227017_5.pdf [file blood-2009-06-227017_5.pdf]

A)

|    | Accession | TF      | Err   | Sens | Spec | p-val  | FD   | Logo |
|----|-----------|---------|-------|------|------|--------|------|------|
| 1  | MA0084    | SRY     | 0.350 | 0.68 | 0.62 | 0.0000 | 0.91 |      |
|    | M00791    | HNF-3   | 0.371 | 0.65 | 0.61 | 0.0000 | 0.89 |      |
| 2  | M00451    | NKX3A   | 0.356 | 0.69 | 0.60 | 0.0000 | 0.83 |      |
| 3  | M00062    | IRF-1   | 0.357 | 0.66 | 0.62 | 0.0000 | 0.79 |      |
| 4  | M00102    | CDP     | 0.357 | 0.67 | 0.62 | 0.0000 | 0.78 |      |
|    | M00103    | Clox    | 0.362 | 0.67 | 0.61 | 0.0000 | 0.77 |      |
| 5  | M00403    | aMEF-2  | 0.363 | 0.67 | 0.60 | 0.0000 | 0.80 |      |
| 6  | M00138    | Oct-1   | 0.374 | 0.63 | 0.62 | 0.0000 | 0.82 |      |
| 7  | M00476    | FOXO4   | 0.375 | 0.60 | 0.64 | 0.0001 | 0.81 |      |
|    | M00290    | Freac-2 | 0.381 | 0.64 | 0.60 | 0.0002 | 0.79 |      |
| 8  | M00424    | NKX6-1  | 0.376 | 0.65 | 0.60 | 0.0001 | 0.80 |      |
| 9  | M00729    | Cdx-2   | 0.379 | 0.61 | 0.63 | 0.0001 | 0.83 |      |
| 10 | M00310    | APOLYA  | 0.379 | 0.64 | 0.60 | 0.0002 | 0.72 |      |

B)

|    | Accession | TF     | Err   | Sens | Spec | <i>p</i> -val | FD   | Logo |
|----|-----------|--------|-------|------|------|---------------|------|------|
| 1  | M00457    | STAT5A | 0.417 | 0.56 | 0.60 | 0.0000        | 0.82 |      |
|    | M00459    | STAT5B | 0.420 | 0.52 | 0.64 | 0.0000        | 0.80 |      |
|    | M00223    | STATx  | 0.427 | 0.51 | 0.64 | 0.0000        | 0.86 |      |
| 2  | M00024    | E2F    | 0.420 | 0.54 | 0.62 | 0.0000        | 0.75 |      |
| 3  | M00729    | Cdx-2  | 0.423 | 0.54 | 0.61 | 0.0000        | 0.83 |      |
| 4  | MA0051    | IRF2   | 0.425 | 0.55 | 0.60 | 0.0000        | 0.76 |      |
|    | M00062    | IRF-1  | 0.427 | 0.50 | 0.65 | 0.0000        | 0.79 |      |
|    | M00699    | ICSBP  | 0.430 | 0.51 | 0.63 | 0.0000        | 0.81 |      |
| 5  | M00003    | v-Myb  | 0.426 | 0.54 | 0.60 | 0.0000        | 0.83 |      |
| 6  | M00464    | POU3F2 | 0.427 | 0.50 | 0.64 | 0.0000        | 0.79 |      |
|    | M00248    | Oct-1  | 0.431 | 0.51 | 0.63 | 0.0000        | 0.81 |      |
| 7  | M00310    | APOLYA | 0.429 | 0.51 | 0.63 | 0.0000        | 0.73 |      |
| 8  | M00241    | Nkx2-5 | 0.430 | 0.53 | 0.61 | 0.0000        | 0.85 |      |
| 9  | M00930    | Oct-1  | 0.431 | 0.52 | 0.61 | 0.0000        | 0.88 |      |
| 10 | M00405    | MEF-2  | 0.431 | 0.54 | 0.60 | 0.0000        | 0.83 |      |
