# Supplementary material
Source: PubMed Central journal article supplement (PMC2817639)
Supplement: blood-2009-06-227017_6.pdf [file blood-2009-06-227017_6.pdf]

| ID   | Symbol | Name                                 | p-value | FWER p-value (MT corrected) | BCL6 targets inferred by ARACNe in TF hub                                                                                                                                                                                                                                                                                                                                                                                                                                                                                                                                                                                                                                                                                                                                                                                                                                                                                                                                                                                                                                                                                                                                                                                                                                                                                                                     |
|------|--------|--------------------------------------|---------|-----------------------------|---------------------------------------------------------------------------------------------------------------------------------------------------------------------------------------------------------------------------------------------------------------------------------------------------------------------------------------------------------------------------------------------------------------------------------------------------------------------------------------------------------------------------------------------------------------------------------------------------------------------------------------------------------------------------------------------------------------------------------------------------------------------------------------------------------------------------------------------------------------------------------------------------------------------------------------------------------------------------------------------------------------------------------------------------------------------------------------------------------------------------------------------------------------------------------------------------------------------------------------------------------------------------------------------------------------------------------------------------------------|
| 2305 | FOXM1  | forkhead box M1                      | 0.0E+00 | 0.0E+00                     | 6196;6723;10102;5982;2079;813;3992;8726;11186;2073;3336;5467;80777;6093;6307;10209;10963;10193;10190;2319;<br>8934;1063;1062;6651;7534;292;4076;596;191;8634;3148;694;3087;3021;1019;6059;81620;64116;7516;3587;81542;44<br>0;9158;4190;47;5770;23094;7531;4116;39;1540;1843;9761;10635;9631;10038;2617;113251;6241;10146;9738;9757;23<br>480;752;8192;6430;22974;5700;5701;5702;84823;7411;7419;5424;10240;10247;10244;10092;8906;4172;5810;995;429<br>6;8050;4293;6897;8738;83752;7536;9532;1058;1195;53335;9278;27347;142;7398;5533;9665;2124;4919;1477;9815;23<br>191;10063;5170;57326;22839;8992;27044;4236;5725;10695;10694;7385;7456;1831;9126;580;6470;3796;6477;7048;23<br>112;2014;7756;26135;55623;3183;23479;10449;10114;10443;7852;3561;9131;4137;10592;5695;130872;10598;6503;6<br>654;708;94239;705;393;392;10236;10971;5250;1716;6787;6921;4722;8517;1653;9445;1655;2288;9134;56829;8567;74<br>67;1434;2271;81611;1431;5911;6732;3014;3015;518;79053;10659;8312;8507;10654;283349;10653;1871;4439;972;574<br>05;10628;26227;16;10714;4704;7405;55832;6713;8570;8443;9972;10475;23344;10471;10472;10576;9922;6749;7320;6<br>617;1065;1615;2230;92856;22206;2745;2052;687;400;686;5412;040;5268;80098;5934;51660;0728;0687;2011;32516                                                                                                           |
| 3087 | HHEX   | hematopoietically expressed homeobox | 0.0E+00 | 0.0E+00                     | 54602;10451;23360;9860;220002;8099;1945;3998;50640;3992;3718;10097;7048;55904;51164;2319;348378;2313;1652<br>15;594;272;55833;26092;51115;81622;79666;1452;901;134266;116236;23064;1536;23325;84897;54880;221188;55016<br>;3899;50515;54778;131583;23433;83478;5790;3635;143686;7170;51107;5922;29761;29760;55578;57534;80342;5530<br>3112;26268;9204;55188;622;401152;5747;10695;10681;55119;23112;25942;55623;11276;28981;5597;51379;378;825<br>55024;54518;6856;54704;399;10971;6789;8621;8805;55236;51611;411;9444;56987;1434;149420;518;27314;4261;796<br>70;57407;23081;11010;54800;16;51400;28951;202309;54665;10475;5195;201176;22898;84343;51320;79990;81793;57<br>620;23043;11056;85464;91392;26275;124790;29978;1317;10059;10724;90324;51566;79876;9665;81034;50814;13802<br>3287;5393;10333;3945;9652;10128;23261;55884;10220;1647;27252;5244;55632;10863;7096;80856;58475;1039;5028<br>6498;27074;6482;7702;963;53371;4087;5880;6418;640;643;10762;80008;10483;57690;55284;1235;7323;28984;8851;9<br>923;3983;60560;25771;25777;25778;284611;23077;23075;2553;57609;63925;10048;9262;27069;10605;23499;23318;9<br>643;51056;160518;8894;23389;55266;80777;5336;1633;4066;1983;4064;51291;115352;3603;59893;94081;3073;4602<br>7410;1423;201475;64905;20559;154;4240;25049;054;20075;480;51465;401;23407;6613;52945;47                            |
| 5452 | POU2F2 | POU class 2 homeobox 2               | 0.0E+00 | 0.0E+00                     | 4300;4026;6480;10102;11262;813;2911;80777;9643;6093;4683;6723;10193;10961;2319;960;1063;1062;8344;1662;556<br>;191;969;55830;9278;26156;80208;8662;3021;9679;1019;523;8906;440;4356;23094;7707;2100;694;9761;640;7212;216<br>;2617;9962;10146;9739;54555;23480;23481;23705;5138;8343;8347;8192;6433;6430;22974;5700;3899;7296;7419;6426<br>;10244;8567;971;8935;4297;6897;91694;79073;8738;57804;83752;1058;5451;53335;10725;5927;5922;5928;29760;944<br>5;3708;11040;9665;2124;3112;9815;10063;5170;4261;57326;3417;27044;7226;10659;490;10694;7385;1831;6183;5589<br>;23112;25940;931;55623;8332;6714;1959;6713;10443;7852;10592;3842;5695;8970;9938;55937;4739;708;6850;705;69<br>25;10239;10971;5250;790;4725;4726;2305;5966;25816;64116;8202;56829;240;1385;1434;2271;3394;3012;26999;3015<br>;518;10902;51606;79053;1871;23081;6921;9040;972;2885;11010;4820;26135;26137;6046;9817;8624;9337;10403;2333<br>8;9583;11332;7357;11339;10010;9230;3281;3276;16;5713;10714;7716;7405;2696;23157;10475;9969;10576;4014;6749<br>;7320;5195;4001;1615;5191;7329;92856;50626;2870;4283;3052;2332;5368;5090;5934;55565;5990;1760;9728;6880;1<br>44;4609;3718;11056;9681;1540;9232;8318;1317;1316;10728;10059;1310;10057;10724;5684;10681;7443;7444;5597;1<br>614;26092;644;4074;2040;2236;874731;613;2045;10420;10130;532;2674;4126;4135;4134;7230;9176;1078;1078 |
| 5934 | RBL2   | retinoblastoma-like 2 (p130)         | 0.0E+00 | 0.0E+00                     | 4026;5982;5983;3925;7516;10963;6793;2319;292;55832;26156;9524;22908;7862;10635;10146;7266;9741;10092;1009<br>6;2869;3014;518;5451;5533;5532;8763;687;686;7456;25949;203068;400;25940;3833;55623;23479;10882;94239;393;<br>0971;6787;2305;4722;64116;56829;2271;81611;57405;9532;7852;10628;10403;10714;2696;9757;10572;7320;1965;73<br>29;2870;23517;694;91694;8535;7443;1389;1385;23283;4282;4288;7538;369;7534;51593;7536;7593;10987;10983;5876<br>;5515;5516;53;3033;9631;8527;6518;11034;6511;23253;6426;6427;4297;4296;6428;4293;4292;23387;51585;55269;586<br>9;4609;226;2189;4602;4601;27230;158;7832;9601;51669;3782;1802;6231;813;3336;5467;7048;10209;10193;10190;30<br>21;1019;8738;523;1235;4190;8289;9643;23248;8192;5709;6430;5701;4172;5810;9278;5927;5928;10726;142;83752;57<br>326;22839;10695;10694;1831;3796;6241;10236;3309;5250;790;146542;26994;26999;3015;8726;9134;8050;8507;2833<br>49;11010;11337;11339;11338;9139;23234;6402;16;19;5715;5713;23344;6749;22992;5930;2099;140465;10681;9575;49<br>74;3276;8880;3313;782;147179;7799;154;7153;1031;23649;638;11065;23005;27020;9817;5725;3911;55215;6732;8312<br>;2251;8128;4160;2120;520;0032;55600;35773;5005;7805;2560;10237;5163;0146;0147;2161;0728;0176;1078;1078                                                                                                               |
| 7756 | ZNF207 | zinc finger protein 207              | 0.0E+00 | 0.0E+00                     | 51263;55761;7518;292;55832;55833;55839;80208;80204;51111;81620;81624;9252;22900;8556;116236;5983;10635;10635<br>142;54555;122769;9320;7266;84057;123811;285331;8832;1195;284004;79621;11164;8767;686;23613;403;28962;2347<br>3;3833;131474;55758;130872;94239;55249;51535;10971;23081;4729;6786;6789;4722;93134;2271;81611;23080;51106<br>;57405;4820;10628;10403;10154;22800;57082;54968;10714;10717;112942;10575;10576;7323;1965;7329;84248;83461<br>;80818;143187;23041;1540;7048;9987;92259;23468;65981;4288;55038;9255;10987;9960;55632;9969;5852;259266;8<br>1608;80777;57181;6687;163;905;345778;57097;9184;1810;8635;7337;7334;7332;1977;1603;1974;1606;808;801;10213<br>;3329;5271;79027;388272;51081;5607;9631;11030;56647;23253;6426;6428;23387;51585;55269;30844;4714;2187;226;<br>57649;51123;158;93974;81704;26054;57337;5048;22826;22823;94101;80012;134553;2857;123283;3336;5469;10209;5<br>22;4190;6503;23248;6434;55011;6430;5700;23398;55270;55789;57142;4172;5810;55872;4616;57650;9265;10724;51<br>55;26268;200030;57326;22839;10694;60682;6241;80025;934;83941;10236;54331;5250;5257;83548;147694;3015;518<br>23658;11339;23234;8473;5719;5718;5715;7767;6749;55667;55664;51321;55846;374986;5937;5936;90799;5931<br>5920;51147;26731;9273;9273;9509;70079;95097;2276;51645;4406;15760;7152;5564;1320;32040;1320;964;964                |

|       |       |                                                                                         |         |         |                                                                                                                                                                                                                                                                                                                                                                                                                                                                                                                                                                                                                                                                                                                                                                                                                                                                                                                                                                                                                                                                                                                                                                                                                                                                                                                    |
|-------|-------|-----------------------------------------------------------------------------------------|---------|---------|--------------------------------------------------------------------------------------------------------------------------------------------------------------------------------------------------------------------------------------------------------------------------------------------------------------------------------------------------------------------------------------------------------------------------------------------------------------------------------------------------------------------------------------------------------------------------------------------------------------------------------------------------------------------------------------------------------------------------------------------------------------------------------------------------------------------------------------------------------------------------------------------------------------------------------------------------------------------------------------------------------------------------------------------------------------------------------------------------------------------------------------------------------------------------------------------------------------------------------------------------------------------------------------------------------------------|
| 1386  | ATF2  | activating transcription factor 2                                                       | 0.0E+00 | 2.0E-06 | 3925;10513;27289;5982;8869;7516;8726;10092;5467;6093;10208;10209;10193;1063;1062;6303;292;596;4321;3148;4659;9646;80208;4217;64116;3587;3588;9158;22908;39;7702;694;1842;5573;640;5983;4953;10635;9318;50999;11221;8192;8945;22974;5702;23394;10844;4172;995;7174;1058;27347;9652;84986;1281;2124;1191;8763;10592;27044;2293;69813;10694;1831;5925;25820;25940;23291;9063;55623;57405;83941;23376;10443;221154;9031;10598;372;84869;708705;10971;10972;4725;2305;1653;1655;253943;30849;56829;6430;1434;5911;26999;3015;518;6733;10654;23080;4820;10403;9332;11339;8473;8444;6049;861;10277;54665;6814;23344;10473;10472;10576;27107;6617;4001;9897;2332;5930;51669;23200;8227;3655;1540;9232;8318;1317;9375;8539;5684;7443;10611;23283;26009;3276;10128;4282;4288;9787;51593;7536;2935;2931;7534;5328;10987;2354;10863;3615;147179;7799;2803;2804;154;7155;7153;201562;2364;69557;6241;3725;3727;94239;4830;905;11065;1843;26046;5423;9559;3833;81542;3181;894;55215;6732;10465;4790;7337;27299;8087;91694;4154;7124;9554;7112;7110;10210;10213;10114;79022;5905;262;5515;2550;53;3033;2778;989;893;2773;10733;10730;51512;9320;1859;23210;5562;10606;2073;3161;25800;4116;10782;10787;10038;11215;10423;6126;221927;22962;4238;5225;22282;22283;8645;20550;4738;10672;2699;2073;4691;2274;2275;4164;4091;4313;47 |
| 3091  | HIF1A | hypoxia-inducible factor 1, alpha subunit (basic helix-loop-helix transcription factor) | 0.0E+00 | 2.0E-06 | 10109;3329;25948;402;10206;9662;8874;9262;10322;597;196;9308;9140;55233;253943;10097;5128;901;1844;1536;489;330;3757;6102;11221;157769;4005;3459;10152;8773;6617;9589;10092;4170;10096;1454;9948;9949;23429;23531;23186;10576;23637;4616;27107;7071;22898;55573;329;5209;253                                                                                                                                                                                                                                                                                                                                                                                                                                                                                                                                                                                                                                                                                                                                                                                                                                                                                                                                                                                                                                       |
| 11278 | KLF12 | Kruppel-like factor 12                                                                  | 0.0E+00 | 1.9E-05 | 55346;4026;6950;57804;23360;83930;23366;55785;10106;8693;10892;10897;8099;161;54502;811;50640;813;3992;8726;7046;1495;7128;6093;10208;56478;7462;51164;84936;81537;6651;51742;55589;10806;81614;8621;1124;25888;196528;80758;57599;402415;80204;79728;26091;1235;79666;5007;2762;4194;4191;23091;23541;23092;55332;7702;7700;0;30;5573;1844;9412;23063;23143;54495;51263;54880;4082;23240;9665;51022;3899;7419;91523;54778;29960;55270;7430;10243;10240;55768;10244;55755;1997;9439;9857;8930;65117;163590;29881;2864;284098;143684;9962;27347;10933;143;3708;79590;3707;9760;2124;949;124961;1477;26263;64167;26268;10063;55188;57325;57727;84992;22936;8545;10659;10694;6478;5629;55119;8493;25948;25824;901;27071;23112;3837;3833;10285;55626;94081;55173;11276;84908;9921;9669;126789;84343;8417;5928;22847;8793;55758;85007;54619;6654;64768;22796;21974;399;9874;10611;1717;9860;51191;51193;83891;8802;3592;2288;79893;6314;23161;157848;23169;11124;11083;79789;4064;60560;6732;10905;26228;5202;51809;29926;5177;79675;79573;5534;7465;9877;175;11010;4820;8795;10628;23013;26136;4792;27292;6048;23157;7337;10150;10154;80255;23338;22800;10018;11335;23231;6712;340273;54800;5788;8618;740594120;644;84964;20220;5667;5210;4090;2322;6495;4095;55704;232;0564;55704;552;0052;61093;55435;076            |
| 6929  | TCF3  | transcription factor 3 (E2A immunoglobulin enhancer binding factors E12/E47)            | 0.0E+00 | 2.8E-05 | 3925;5191;5552;3399;7957;5079;22936;9320;1075;9683;1316;5101;6400;9741;6919;23169;23248;372;1063;2778;2202988;10327;10538;55830;894;8527;27065;6782;896;8887;7538;5962;25800;10134;3667;9528;94239;2353;5771;23097;53635;25976;26994;1843;30;518;23384;55818;605;55544;50999;10550;2802;2803;23240;8115;597;22974;7155;7153;26136;6885;9138;3073;23231;10010;6774;960;5341;10923;1107;2026;29799;8837;2354;2735;4082;8739;942;23635;25841;5873;83759;4929;323;3189;644;5289;142;8914;79621;841;10461;481;26065;949;8936;355;7465;2534                                                                                                                                                                                                                                                                                                                                                                                                                                                                                                                                                                                                                                                                                                                                                                              |
| 2908  | NR3C1 | nuclear receptor subfamily 3, group C, member 1 (glucocorticoid receptor)               | 0.0E+00 | 3.8E-05 | 4306;7110;5747;6478;694;10892;811;931;9686;5469;5594;4643;4739;6653;2060;820;10134;597;4209;399;27065;1859;3574;1019;7534;2288;221037;5244;8895;5573;9792;27314;5128;1604;9262;6856;55818;219333;9320;11221;7096;7157;81609;7316;7266;201562;10672;5788;5294;5862;23527;10314;705;3725;5106;10097;10096;4830;3423;1452;2353;489;9817;2632;23180;9595;9140;7844;54665;7357;55669;329;80308;25932;253                                                                                                                                                                                                                                                                                                                                                                                                                                                                                                                                                                                                                                                                                                                                                                                                                                                                                                                |
| 2023  | ENO1  | enolase 1, (alpha)                                                                      | 0.0E+00 | 6.3E-05 | 6832;8624;57326;3718;4026;27044;10694;7456;4706;11262;5983;29799;9688;25777;25940;813;7805;10724;3336;5646;713;10443;7347;3033;5695;1385;1662;677;191;83752;3276;4208;10128;3309;26156;790;3574;1019;440;2935;23253;5905;23094;9643;6675;1434;2271;4297;7716;6732;53335;5876;3313;4953;3099;8819;4261;10659;147179;5330;23404;5702;9631;2800;23081;11010;26135;26137;9139;3608;9868;11332;4609;10010;10244;16;5424;1029;6774;6059;5750;2696;2107;3635;3112;10475;8564;6897;3735;92856;11171;3108;1965;8906;5927;6183;8202;80342;3708;488;9040;483;3707;1802;3423;27292;80208;1606;472;3073;1094                                                                                                                                                                                                                                                                                                                                                                                                                                                                                                                                                                                                                                                                                                                    |
| 2004  | ELK3  | ELK3, ETS-domain protein (SRF accessory protein 2)                                      | 0.0E+00 | 1.1E-04 | 3718;2841;6950;5747;57228;931;1794;1958;4739;5305;1380;9262;708;5607;10128;3574;5567;2665;1653;911;2288;253;901;1843;34;6856;5336;7014;23240;4005;6760;26135;3603;8773;23433;6520;2181;10953;23231;7844;1024;272;8935;2027;23180;8560;23637;10982;6102;323;22898;8412;3359;7337;401                                                                                                                                                                                                                                                                                                                                                                                                                                                                                                                                                                                                                                                                                                                                                                                                                                                                                                                                                                                                                                |
| 27086 | FOXP1 | forkhead box P1                                                                         | 0.0E+00 | 1.2E-04 | 55346;4026;10451;9860;9679;220002;9464;10892;51265;54502;55764;1520;55768;817;55347;89970;57510;7128;5469;1499;55907;4683;10961;79136;6653;10808;84101;5911;51606;152559;4820;597;961;6599;3007;8601;1124;91319;259307;1106;51111;83719;523;84376;79666;2762;4194;9760;7862;9852;23541;64112;2042;25976;132671;9559;643;644;10144;54554;331;3295;84698;55016;51022;3899;7803;81873;7419;51056;23433;1435;3996;55784;2271;83478;5790;154754;29969;3635;143684;81619;23637;57805;5063;2342;26191;53335;153733;29766;29760;9262;79621;147694;9814;91703;4664;58528;153020;91782;8428;9334;22936;60684;949;54885;9839;6576;55119;7048;8452;23111;55332;11276;3621;9949;9668;54904;51379;51194;378;54880;348378;54922;54518;55754;934;6856;7048;6850;55249;5305;3267;27436;397;10239;10238;9019;9444;2308;7852;205327;8805;51619;124540;963;57556;64699;3157;971;135293;518;55305912;129685;79670;10308;10653;153129;84281;6925;23081;8115;199223;26137;23012;23019;114836;10152;10153;10150;23338;55326;4150;7832;10018;5101;2113;54800;23327;16;7767;6713;10277;4660;122809;10477;63826;5879;9969;81544;4008;7323;1964;1965;64805;1967;4005;1962;80314;8773;64131;51088;55846;6432;9601;3622;117289;7999;4378;64082;57620;5026;55565;95766;20882;20851;55686;0652;6200;4124;0067;67620;1217;10050;10056;0210;2270     |

|       |        |                                                         |         |         |                                                                                                                                                                                                                                                                                                                                                                                                                                                                                                                                                                                                                                                                                                                                                                                                                                                                                                                                                                                                                                                                                                                                                                                                                                                                                                                                                                                                                                                                                                                                                                                                                                                                                                                                                                                                                                                                                                                                                                                                                                                                                                                                                                                                                                                                                                                                                                                                                                 |
|-------|--------|---------------------------------------------------------|---------|---------|---------------------------------------------------------------------------------------------------------------------------------------------------------------------------------------------------------------------------------------------------------------------------------------------------------------------------------------------------------------------------------------------------------------------------------------------------------------------------------------------------------------------------------------------------------------------------------------------------------------------------------------------------------------------------------------------------------------------------------------------------------------------------------------------------------------------------------------------------------------------------------------------------------------------------------------------------------------------------------------------------------------------------------------------------------------------------------------------------------------------------------------------------------------------------------------------------------------------------------------------------------------------------------------------------------------------------------------------------------------------------------------------------------------------------------------------------------------------------------------------------------------------------------------------------------------------------------------------------------------------------------------------------------------------------------------------------------------------------------------------------------------------------------------------------------------------------------------------------------------------------------------------------------------------------------------------------------------------------------------------------------------------------------------------------------------------------------------------------------------------------------------------------------------------------------------------------------------------------------------------------------------------------------------------------------------------------------------------------------------------------------------------------------------------------------|
| 2120  | ETV6   | ets variant gene 6 (TEL oncogene)                       | 0.0E+00 | 1.2E-04 | 4026;9776;65244;54509;51284;11186;1497;960;80124;10961;2319;1062;55588;10800;3146;79720;117155;26091;5111<br>5;5500;79665;79661;3588;4193;197259;23091;23097;1847;10632;240;84897;4082;83874;10380;9646;3455;3459;8419<br>6;9425;6426;6617;10242;10098;84942;92822;969;56659;143684;9063;9958;57659;5450;166824;27347;141;147694;99<br>44;23503;5532;57458;652968;80255;26065;65005;1477;283578;26191;84991;22839;92797;22936;9124;51574;2014;96<br>85;9686;54765;3930;4033;6714;10111;51278;54737;5928;84750;55028;6929;51075;151246;94239;27436;124997;394<br>7133;5251;51199;1716;6786;51191;64844;3665;79893;64397;3669;80237;23169;11124;11083;1635;1434;26996;13529<br>3;51105;64167;9134;8050;10659;153129;7465;219333;6760;8793;90390;1500;6046;10400;2620;10409;123228;10019<br>64332;23231;5106;3281;6402;23155;10717;659;2029;84064;92610;4217;4017;23344;10473;4008;84248;55704;80310<br>92856;55667;8322;51088;3622;57157;3359;55013;4717;55850;80308;669;23043;79682;11051;4125;6003;1540;4907;2<br>6276;50484;84230;8717;57142;10057;63826;51567;55743;55106;54847;10614;2140;2060;26009;5747;23306;4123;753<br>4;55033;50861;10988;27250;6772;150275;5876;55632;50619;9846;154197;25782;54014;79791;55958;201562;297807<br>6989;4931;22998;23112;22572;20672;2844;2720;25949;25651;2484;14049;6060;4083;1406;6790;6884;2262;2<br>23360;9282;54509;6309;84717;54737;5464;55900;1063;129401;286826;6598;3676;80208;80204;114609;51111;5225;5<br>07;494143;4190;8021;23094;39;134266;6503;25879;4953;113251;83874;10380;6432;8195;7411;201475;3635;10844;8<br>4376;92822;57343;57659;51155;147694;79788;26263;26268;9204;10659;10695;23112;9681;80021;7750;55332;11276;<br>157313;10443;829;5695;10238;10971;5257;6786;6789;4726;56987;10806;91749;80212;3015;153129;23081;6921;9210<br>5;11010;153830;26137;26036;10403;255394;11232;151525;9653;5713;199704;7767;84062;10475;134492;7323;99585<br>5846;9910;3622;80709;11056;2762;26275;29116;1317;8539;147923;10681;165055;5597;54847;5393;55737;8445;1043<br>4;222643;55422;54443;54832;6671;5873;9967;55958;259266;58478;7094;8106;9134;57003;79651;6482;339487;80055<br>;8564;3431;8635;55608;55284;4017;9922;153684;1786;7110;55690;4704;79022;5515;2550;10648;200014;10044;5607;<br>2782;79801;1520;56647;10130;55729;23318;10427;221037;160518;8895;8891;23387;23389;4249;1738;91010;6880;28<br>4406;79791;9450;57541;81;8676;5289;10175;8556;51466;56943 |
| 10782 | ZNF274 | zinc finger protein 274                                 | 0.0E+00 | 1.3E-04 | 07;494143;4190;8021;23094;39;134266;6503;25879;4953;113251;83874;10380;6432;8195;7411;201475;3635;10844;8<br>4376;92822;57343;57659;51155;147694;79788;26263;26268;9204;10659;10695;23112;9681;80021;7750;55332;11276;<br>157313;10443;829;5695;10238;10971;5257;6786;6789;4726;56987;10806;91749;80212;3015;153129;23081;6921;9210<br>5;11010;153830;26137;26036;10403;255394;11232;151525;9653;5713;199704;7767;84062;10475;134492;7323;99585<br>5846;9910;3622;80709;11056;2762;26275;29116;1317;8539;147923;10681;165055;5597;54847;5393;55737;8445;1043<br>4;222643;55422;54443;54832;6671;5873;9967;55958;259266;58478;7094;8106;9134;57003;79651;6482;339487;80055<br>;8564;3431;8635;55608;55284;4017;9922;153684;1786;7110;55690;4704;79022;5515;2550;10648;200014;10044;5607;<br>2782;79801;1520;56647;10130;55729;23318;10427;221037;160518;8895;8891;23387;23389;4249;1738;91010;6880;28<br>4406;79791;9450;57541;81;8676;5289;10175;8556;51466;56943                                                                                                                                                                                                                                                                                                                                                                                                                                                                                                                                                                                                                                                                                                                                                                                                                                                                                                                                                                                                                                                                                                                                                                                                                                                                                                                                                                                                                                                               |
| 4601  | MXI1   | MAX interactor 1                                        | 1.0E-06 | 2.9E-04 | 665;1267;9363;10109;23613;6003;2014;56255;7803;3833;10057;3936;11278;10209;4643;7317;2995;708;3383;6786;41<br>21;4048;4049;2762;8351;23387;5336;7014;11221;3455;7292;638;9404;25793;4174;10092;4830;9184;10477;23180;400<br>1;3604;27347;142;2729;3359;5366;4017;941;9882;9921;687;8726;2626                                                                                                                                                                                                                                                                                                                                                                                                                                                                                                                                                                                                                                                                                                                                                                                                                                                                                                                                                                                                                                                                                                                                                                                                                                                                                                                                                                                                                                                                                                                                                                                                                                                                                                                                                                                                                                                                                                                                                                                                                                                                                                                                    |
| 672   | BRCA1  | breast cancer 1, early onset                            | 1.0E-06 | 3.3E-04 | 27065;3925;841;7411;23515;3416;11051;9168;6726;10213;5725;10695;55699;4704;8445;5983;3796;79022;9688;9839<br>6241;11056;10957;81611;9787;10059;3883;10054;3930;2073;8125;51593;10111;3561;7112;10632;10592;1389;74<br>43;5911;7317;5885;9601;23468;10042;6491;10733;6426;10550;10128;55832;81565;10238;118;10971;5411;5412;6667;<br>1520;1521;23165;4217;580;3588;94239;47;10541;10038;81620;1434;7133;55120;7158;6772;3015;9631;2617;9019;913<br>4;9126;55544;4439;7157;10916;5298;4534;22974;7153;57405;10628;10915;5869;8479;23649;29893;23421;3609;1647;<br>5424;5557;9741;11337;11339;27067;23234;8473;163;1027;4172;5717;4830;11067;6774;5810;1164;84823;2355<br>4;9184;10473;4292;6470;1058;1615;3181;675;8570;23306;8914;9445;39;55215;4706;5558;51669;4683;472;4001;4288                                                                                                                                                                                                                                                                                                                                                                                                                                                                                                                                                                                                                                                                                                                                                                                                                                                                                                                                                                                                                                                                                                                                                                                                                                                                                                                                                                                                                                                                                                                                                                                                                                               |
| 3662  | IRF4   | interferon regulatory factor 4                          | 1.0E-06 | 3.8E-04 | 55346;4026;4148;3998;813;9686;51284;1796;1495;960;7048;10808;10806;55585;1122;55833;2820;9777;1106;3383;91<br>754;26258;26256;4217;5007;444;901;7700;1846;57507;334;8658;84056;50515;51088;81614;51231;22884;6890;1245<br>0;27347;56006;143;141;5532;80255;26065;944;11163;124961;9581;8763;153020;283578;10067;401152;27044;23613<br>22834;6470;28968;7772;9061;10523;54765;9662;6711;51278;29766;8875;221154;820;27436;1488;196743;9110;2288<br>79893;56986;30849;8202;1435;26146;79694;135293;6733;84182;9120;6925;6924;4343;4820;53918;10620;147015;659<br>;10152;5892;10018;8479;55825;5106;3281;19;23155;25914;51399;5210;24145;11249;24140;3676;5191;80310;51321;1<br>57807;8030;3359;9583;2235;51144;57142;55180;84896;57458;6446;6917;22929;9666;5612;10611;9577;92797;3949;9<br>659;3570;7248;84458;10228;10988;6772;10982;92745;9960;10277;60;10659;5770;29780;79188;55024;57609;359948<br>961;25996;2890;1105;9435;4087;84085;9181;23635;23637;2744;10483;54407;122830;894;201595;4794;4793;51701;4<br>154;4155;196264;10632;84317;217;60560;7110;3326;6645;9958;7803;670;57693;80237;29126;29123;535;64145;100<br>8;57326;5602;11034;28232;55133;57510;80124;25800;23499;11214;9646;22868;114294;54535;6832;55269;1739;1663<br>4;625;6788;2692;28800;2181;26307;1024;3162;4182;9296;57104;14170;59532;2131;1023;057;359512;0425;55404;224                                                                                                                                                                                                                                                                                                                                                                                                                                                                                                                                                                                                                                                                                                                                                                                                                                                                                                                                                                                                                                                                          |
| 3899  | AFF3   | AF4/FMR2 family, member 3                               | 1.0E-06 | 4.6E-04 | 79368;2969;7799;10451;10472;7832;3635;9665;2308;4067;11262;53335;27086;406;2033;3087;2113;5788;81704;816<br>4;90338;4194;117289;11276;11278;23094;84108;55103;7528;1997;861;4739;6507;2313;9570;2005;57504;55024                                                                                                                                                                                                                                                                                                                                                                                                                                                                                                                                                                                                                                                                                                                                                                                                                                                                                                                                                                                                                                                                                                                                                                                                                                                                                                                                                                                                                                                                                                                                                                                                                                                                                                                                                                                                                                                                                                                                                                                                                                                                                                                                                                                                                |
| 2553  | GABPB2 | GA binding protein transcription factor, beta subunit 2 | 2.0E-06 | 7.1E-04 | 55854;3927;11196;9360;11051;5828;4673;23473;10057;10285;262;2551;7112;5612;1666;594;4893;81;5763;6782;5562<br>;5128;9318;5771;53635;8899;6428;4144;51582;10632;2802;7094;4946;7155;4249;10915;7803;9972;567;9584;10564;9<br>589;1915;4076;81542;27107;54870;1968;7323;1964;1192;8405;55669;7326;7337;51663;80                                                                                                                                                                                                                                                                                                                                                                                                                                                                                                                                                                                                                                                                                                                                                                                                                                                                                                                                                                                                                                                                                                                                                                                                                                                                                                                                                                                                                                                                                                                                                                                                                                                                                                                                                                                                                                                                                                                                                                                                                                                                                                                   |
| 3663  | IRF5   | interferon regulatory factor 5                          | 2.0E-06 | 8.6E-04 | 10063;57326;1786;6726;10694;1831;694;5983;8869;23112;2014;23295;7756;23474;8738;10054;3930;9662;7128;978;<br>7443;7347;79073;1820;10592;1063;94239;596;311;10733;392;11034;4125;7538;522;9846;10423;1434;10988;3460;429<br>6;3512;80342;2617;10659;8517;57405;5330;5770;1635;22974;7153;9938;1031;9134;6426;8905;3281;960;5718;3376;<br>1065;969;4688;1105;8837;1164;4082;154;23635;1058;3431;952;1298;3181;10175;55215;5532;54107;4794;9214;5830<br>1606;6518;7185                                                                                                                                                                                                                                                                                                                                                                                                                                                                                                                                                                                                                                                                                                                                                                                                                                                                                                                                                                                                                                                                                                                                                                                                                                                                                                                                                                                                                                                                                                                                                                                                                                                                                                                                                                                                                                                                                                                                                             |
| 8553  | BHLHB2 | basic helix-loop-helix domain containing, class B, 2    | 2.0E-06 | 8.6E-04 | 5552;7957;7110;5074;5378;4673;9683;567;23764;200734;1495;7128;960;3563;4736;6397;10611;6310;2799;10614;554<br>;115207;2776;9322;6386;6455;894;7133;9910;3383;3588;7525;3956;1848;4053;10988;26994;1725;1847;1846;5872;2<br>384;10632;10865;8507;8743;2195;10550;2803;1635;3459;29780;10154;5557;3073;11232;8682;7163;8936;8665;6210;6<br>05;4082;79090;6890;10577;23421;950;4929;26112;6038;4092;9444;5996;22823;439921;5830;2180                                                                                                                                                                                                                                                                                                                                                                                                                                                                                                                                                                                                                                                                                                                                                                                                                                                                                                                                                                                                                                                                                                                                                                                                                                                                                                                                                                                                                                                                                                                                                                                                                                                                                                                                                                                                                                                                                                                                                                                               |

|       |         |                                                              |         |         |                                                                                                                                                                                                                                                                                                                                                                                                                                                                                                                                                                                                                                                                                                                                                                                                                                                                                                                                                                                                                                                                                                                                                                                                                                                                                                                                                                                                                                                                                                                                                                                                                                                                                                                                                                                                             |
|-------|---------|--------------------------------------------------------------|---------|---------|-------------------------------------------------------------------------------------------------------------------------------------------------------------------------------------------------------------------------------------------------------------------------------------------------------------------------------------------------------------------------------------------------------------------------------------------------------------------------------------------------------------------------------------------------------------------------------------------------------------------------------------------------------------------------------------------------------------------------------------------------------------------------------------------------------------------------------------------------------------------------------------------------------------------------------------------------------------------------------------------------------------------------------------------------------------------------------------------------------------------------------------------------------------------------------------------------------------------------------------------------------------------------------------------------------------------------------------------------------------------------------------------------------------------------------------------------------------------------------------------------------------------------------------------------------------------------------------------------------------------------------------------------------------------------------------------------------------------------------------------------------------------------------------------------------------|
| 2313  | FLI1    | Friend leukemia virus integration 1                          | 2.0E-06 | 9.4E-04 | 10298;10451;9860;8909;50640;3858;11147;123283;10844;7048;23362;4739;57727;51762;51606;9726;81839;2820;80208;57599;26092;3021;8738;9255;6938;7903;23253;25974;79811;5573;6050;23064;1536;643;9554;84896;84897;55608;65056;10794;9282;9665;8192;84759;3899;50515;55151;54778;55270;23433;57228;10242;84717;4170;5187;5188;84942;23185;2869;3635;143684;85464;7073;55573;5922;29761;79621;3708;1889;54102;58526;3112;8763;153020;57157;515180;27044;9813;5074;25921;403;9567;931;23118;9063;4033;9702;126789;7259;378;55024;54518;6856;399;54331;23080;55356;6789;4726;55233;2288;26003;253943;240;220972;80212;64163;4261;79573;51535;23081;9873;153830;79948;10628;26136;6048;10152;23338;11332;23231;9589;16;51400;2696;55142;84641;84640;54664;10475;55197;201176;55680;3052;374986;5366;51663;663;55188;5500;8445;117178;57223;5062;10724;84987;8539;10681;27071;5594;79876;337867;10611;9577;55294;26009;3949;9652;79666;22992;7534;54521;7430;84455;382;1647;64858;84216;84064;5367;81609;57679;83593;2582;5293;10160;11320;11325;1810;640;3187;2744;54407;122830;55350;51389;201595;11276;3981;55677;54726;2845;54704;55914;57826;54885;56255;129642;284611;8635;23075;29121;2995;52;10320;80199245741;5562;5352;2989;3981;4894;46719;8989;7512;5529;33406;10253;3739;15776;51301;6762;8423;9326495;4089;4208;6929;6772;1871;23081;2308;1054;6418;4064;951;80204;60468;27086;3899;829;2113;5966;54502;79666;10728;639;3956;57459;124790;5597;9792;2313;4688;387032;643;79368;55565;9355;10863;9857                                                                                                                                                                                                                                                                                                     |
| 53335 | BCL11A  | B-cell CLL/lymphoma 11A (zinc finger protein)                | 3.0E-06 | 1.5E-03 | 4306;134492;151613;153222;678;7710;7593;7637;7776;203068;10606;23112;6183;11180;129831;2931;10782;5989;5467;57082;3727;10443;2120;4299;7728;3093;55775;1389;55892;4830;15124                                                                                                                                                                                                                                                                                                                                                                                                                                                                                                                                                                                                                                                                                                                                                                                                                                                                                                                                                                                                                                                                                                                                                                                                                                                                                                                                                                                                                                                                                                                                                                                                                                |
| 57659 | ZBTB4   | zinc finger and BTB domain containing 4                      | 3.0E-06 | 1.6E-03 | 2969;6772;10106;4780;677;57459;9665;5993;11278;79876;2313;1385;84881;64288;4208;397;3148;1859;4802;57599;660;8880;4720;7430;23318;23092;23316;122953;2100;84124;6774;4297;3091;51742;54885;54581;7342;9332;35167;94;27086;6856;4089;2113;9337;55274;9139;8061;9583;7358;7419;4170;7528;1997;861;4830;7161;867;55144;8832;604;4082;10672;8522;7832;54518;2130;2131;9815;7328;60468;9813;10762;2033;7182;2308;489;11317;3359;4791;9815;4012;7323;2004;687;26268;3198                                                                                                                                                                                                                                                                                                                                                                                                                                                                                                                                                                                                                                                                                                                                                                                                                                                                                                                                                                                                                                                                                                                                                                                                                                                                                                                                          |
| 7024  | TFCP2   | transcription factor CP2                                     | 4.0E-06 | 1.9E-03 | 5080;1781;8743;6856;23185;5336;7014;57804;11018;1964;26135;2665;695;2113;29760;10627;3603;963;142;3071;3828417;3428;10097;10096;16;4739;5573;23064;8935;7408;1452;1381                                                                                                                                                                                                                                                                                                                                                                                                                                                                                                                                                                                                                                                                                                                                                                                                                                                                                                                                                                                                                                                                                                                                                                                                                                                                                                                                                                                                                                                                                                                                                                                                                                      |
| 90321 | ZNF766  | zinc finger protein 766                                      | 4.0E-06 | 1.9E-03 | 604;153222;10009;2099;23224;7692;8905;2014;64172;4774;1958;51701;4299;4033;867;8618;1368;25932                                                                                                                                                                                                                                                                                                                                                                                                                                                                                                                                                                                                                                                                                                                                                                                                                                                                                                                                                                                                                                                                                                                                                                                                                                                                                                                                                                                                                                                                                                                                                                                                                                                                                                              |
| 1997  | ELF1    | E74-like factor 1 (ets domain transcription factor)          | 6.0E-06 | 2.8E-03 | 10063;164;490;1831;10892;10897;25948;23075;10206;262;10681;10208;10193;167227;3417;2068;8738;6856;597;191;5763;11030;3575;8880;4124;5527;8665;253943;64116;3956;640;23387;23063;51582;10983;1871;2800;4067;2885;6760;26137;54665;5788;23231;6480;9589;7163;65117;8567;2100;10672;3635;9337;23186;5495;9595;5728;3108;22898;4848;329;10260;51465;4790;7351;26065;6237;9695;9921                                                                                                                                                                                                                                                                                                                                                                                                                                                                                                                                                                                                                                                                                                                                                                                                                                                                                                                                                                                                                                                                                                                                                                                                                                                                                                                                                                                                                              |
| 678   | ZFP36L2 | zinc finger protein 36, C3H type-like 2                      | 6.0E-06 | 2.9E-03 | 114785;54602;114789;4026;23360;10513;9678;56829;201725;51263;55762;8909;7518;54737;11180;11186;662;80777;7048;55904;10209;2319;348378;1063;5911;51606;81839;64839;961;55832;55839;79720;580;8661;6733;7637;51115;83719;81624;81894;4190;50861;57185;23094;104;90952;134266;7700;1843;113178;79811;116236;10635;23321;80342;23480;23248;83874;10380;9631;5771;6434;55011;6430;5700;7411;123811;10240;92259;83478;92822;27133;3635;3064;57659;1058;55577;157313;9446;5533;340481;123228;7153;148867;8767;26263;10063;200030;1195;8087;8050;23594;4;10659;6571;403;23112;4863;934;374354;9665;10882;9702;10443;7259;55758;55024;55023;151246;2902;123355;5249;51251;27436;10971;4729;1716;6787;6789;8802;1653;51203;6580;30844;1738;64116;2287;11083;1434;2271;8161;80212;3014;51106;51105;60682;23658;7852;55329;9877;6921;8473;10628;9824;26135;657;6048;10403;9404;10393;57082;11339;23235;10015;93974;5718;28951;7767;55142;55833;4014;51714;6617;63979;201176;55706;9584;9958;51081;94081;221692;1477;155435;9910;4714;5937;90799;11332;8487;5930;51669;79157;143187;91754;65981;23515;11052;283991;694;9230;85464;9318;57223;29116;29979;7538;1317;23600;522;10057;5147;90324;6992;152485;84897;2029;6452;20237;29866;40617;23460;43084;20076;23364;40424;23660;55423;8025;55332;51503;65095;54932;10721196;665;4609;7707;11051;11338;10346;7326;25;5982;4144;3925;8493;995;1314;6181;5062;6446;5594;7112;7317;2068;10598;7726;10049;1062;94239;596;11065;5747;51512;142;10238;27065;5093;6667;1019;4194;9158;3313;7528;2274;1647;901;1843;7158;5983;10654;57405;2194;7014;23240;2885;22974;7490;5786;7337;638;5424;2185;3725;4602;9232;4174;1643;1029;8665;2353;8364;23429;7832;6122;11339;5925;2033;27347;8914;9910;4255;5728;55215;6599;3932;8795;5366;4012;1974;972;472;355;6038;3192;6603;7465;6231 |
| 2551  | GABPA   | GA binding protein transcription factor, alpha subunit 60kDa | 9.0E-06 | 4.0E-03 | 4893;10672;10735;54014;9140;6782;157769;3575;5828;7155;6760;6324;5527;8773;5788;5289;5007;23075;22944;382;2959;10564;57826;4053;8899;4012;23161;51582;398                                                                                                                                                                                                                                                                                                                                                                                                                                                                                                                                                                                                                                                                                                                                                                                                                                                                                                                                                                                                                                                                                                                                                                                                                                                                                                                                                                                                                                                                                                                                                                                                                                                   |
| 10472 | ZNF238  | zinc finger protein 238                                      | 1.6E-05 | 7.2E-03 | 10451;911;23367;10513;93627;9939;9938;54737;1499;7048;961;10961;2319;348378;51606;26092;114609;51111;83719;83478;440;57185;57181;6503;116236;23064;3267;85464;54554;331;9637;6430;3899;163049;10097;64839;157570;635;143686;55971;7170;51155;55578;79621;79626;5530;123228;91703;941;148867;401152;57326;90324;9839;647723112;934;56886;9063;83943;10114;10443;7259;3842;55024;51290;27436;394;54331;6789;64844;30844;56987;253260;340481;7852;153830;26137;9334;5101;151525;949;28951;55142;10475;64805;80314;221692;55843;3621;5890;374896;23515;694;29116;29979;1317;10059;128077;55103;9570;23165;25816;85007;55737;199704;54832;9252;9665;162572;8743;6938;115350;501;25852;1106;79368;9611;8564;1844;54874;3431;9813;7770;6733;8087;55284;4155;7323;1604;808;9922;65244;60560;1786;7110;79027;51773;9668;63920;10048;9601;57343;200014;10044;11034;25963;28232;79801;79800;5567;1520;11216;11214;54518;64218;841;54949;23389;9214;115352;3603;2950;94241;256051;1021;57649;201475;51643;29799;10928;284406;79658;57541;93974;2131;8676;29072;81704;5289;23219;8556;481;3782;94101;51540;10772                                                                                                                                                                                                                                                                                                                                                                                                                                                                                                                                                                                                                                                                                                         |
| 2355  | FOSL2   | FOS-like antigen 2                                           | 1.6E-05 | 7.2E-03 | 10538;79090;5527;7957;7112;6856;54014;7014;5763;27240;1633;5884;2665;4490;6048;5450;23764;23075;7163;7095;3725;8061;8417;4792;4931;6118;167227;10190;695;10632;4123;8930;23063;51465;7360;1086                                                                                                                                                                                                                                                                                                                                                                                                                                                                                                                                                                                                                                                                                                                                                                                                                                                                                                                                                                                                                                                                                                                                                                                                                                                                                                                                                                                                                                                                                                                                                                                                              |

|       |        |                                                            |         |         |                                                                                                                                                                                                                                                                                                                                                                                                                                                                                                                                                                                                                                                                                                                                                                                                                                                                                                                                                                                                                                                                                                                                                                                                                                                                                                   |
|-------|--------|------------------------------------------------------------|---------|---------|---------------------------------------------------------------------------------------------------------------------------------------------------------------------------------------------------------------------------------------------------------------------------------------------------------------------------------------------------------------------------------------------------------------------------------------------------------------------------------------------------------------------------------------------------------------------------------------------------------------------------------------------------------------------------------------------------------------------------------------------------------------------------------------------------------------------------------------------------------------------------------------------------------------------------------------------------------------------------------------------------------------------------------------------------------------------------------------------------------------------------------------------------------------------------------------------------------------------------------------------------------------------------------------------------|
| 1523  | CUX1   | cut-like homeobox 1                                        | 1.6E-05 | 7.2E-03 | 114785;84624;1948;51303;9938;8905;165918;146845;161436;6653;1662;81839;1122;140459;26258;81622;79661;272;5770;7700;640;26025;57507;3099;10632;23327;85464;7342;23240;8658;50515;55151;55781;8930;22883;9595;6897;124540;1191;29761;27347;153443;9111;5532;4507;3707;26065;80155;57325;3437;28968;23112;9661;9686;3837;55623;200734;9662;6714;5928;134430;54331;51199;6789;8801;93134;51611;30849;56829;240;7782;81614;3708;79053;8726;79675;9124;89857;6924;23013;8085;23231;11338;154881;26031;6748;5218;9958;51321;2965;11005;6003;4907;8987;23568;9175;152485;54847;26005;2060;23461;4217;10128;51699;10923;65008;7430;5682;6675;10542;10983;92745;60485;115123;55958;23527;9868;6950;962;1456;1105;81671;84128;5884;23635;23637;9188;55074;1107;10762;10766;10483;81550;51701;55284;9554;805;55505;60560;55690;55917;5479;6645;84859;163486;10950;669;80237;4643;2475;5151;134218;50808;5695;84295;23318;10421;51582;127544;6605;196743;1739;51227;375748;29896;54165;2970;26207;1024;255488;604;8994;93974;2131;953;23210;23194;64318;3428;25839                                                                                                                                                                                                                                             |
| 4802  | NFYC   | nuclear transcription factor Y, gamma                      | 3.2E-05 | 1.5E-02 | 114785;196074;51265;51263;3998;85450;6157;6159;10963;81537;4739;64708;55584;140890;80204;387921;79813;8128;6373;5980;10144;54880;9328;83874;55761;6208;54778;10564;92;84271;29969;143684;5533;1281;11164;1000;5627;123036;4736;80006;6146;394;10971;240;2271;80213;10461;657;153830;9400;26039;9404;26036;53345;10409;57082;6217;112942;6814;10577;1615;7328;10081;2870;8621;114876;29117;91694;8535;201633;23287;286148;64426;55037;7536;55254;382;6171;64857;4752;10982;5872;64581;201562;6687;286451;6196;140459;64927;5294;57097;9181;1810;6222;6224;6228;54407;7337;7334;1974;801;5479;1776;5514;11103;50;151188;6167;134553;5868;2181;57649;6181;81704;5289;9358;10773;9517;6232;83930;83931;9282;80830;3021;144577;8289;6507;79612;65057;50999;11340;80146;23240;11170;221188;51022;6433;55785;201163;51338;51335;9948;51805;3064;4616;10923;26268;9363;5079;9158;10748;10524;83943;54518;10236;10238;11124;26999;517;23013;23019;23231;11338;88455;23234;19;83959;204851;5934;85397;85464;26275;5063;84991;94120;158747;56886;9577;8887;84515;1729;54788;60;359948;25996;1452;23005;1108;27020;9819;9815;5725;374354;81559;6732;6734;8085;4154;6645;7803;26057;10320;4891;2776;9141;134218;10707;23095;5490;29344;70384;20972;469;489;8432;44215;23280;55046;65046;14327;20020;51610;9026 |
| 4087  | SMAD2  | SMAD family member 2                                       | 4.0E-05 | 1.8E-02 | 11196;1267;6667;11051;6478;3796;6324;9061;9063;10728;5062;3183;29969;10449;6158;5594;7112;6654;1666;594;596;6599;11030;4123;2079;9570;8801;23499;382;6171;10987;5573;34;51582;55937;9318;989;2803;8030;9976;80777;677;1500;4089;10627;23524;8773;567;5557;8479;57228;9026;1915;5558;6118;4076;6455;10928;4249;2869;81542;7326;1968;1195;22898;4092;4090;141;488;9215;5366;9805;5631;7461                                                                                                                                                                                                                                                                                                                                                                                                                                                                                                                                                                                                                                                                                                                                                                                                                                                                                                          |
| 6772  | STAT1  | signal transducer and activator of transcription 1, 91kDa  | 4.1E-05 | 1.9E-02 | 4026;51265;10897;54502;8905;3992;7128;359948;10208;6598;81831;6389;3383;8739;79666;3588;4194;7867;103;815;1847;1846;9559;644;57507;6373;8452;54885;50999;23240;3455;3458;3899;23433;221037;55784;10243;8934;8930;837;6890;143;4502;58528;941;57620;90324;3417;5079;22936;80830;25948;23474;53332;5996;6714;8874;55754;64850;84447;5257;51191;51619;8801;64110;26994;10906;64167;4189;79670;4343;7716;11010;10150;23231;56548;51321;3628;4283;203328;219736;4300;23043;1540;57142;91694;5140;1318;51566;94120;27074;152485;56886;7444;5597;79876;6310;3949;51696;10923;7248;55884;10988;64859;6773;5873;169714;8743;29940;115350;9868;5552;9860;25976;80008;10483;894;23075;4792;84250;4012;51312;51311;55850;214;400223;115761;1075;10959;6993;29126;4643;2495;10320;4898;10327;9852;8527;6307;3958;84888;117289;10788;55755;284996;51056;51075;160518;114294;54431;53335;7016;1595;2182;3073;94240;1024;87178;7163;5423;51643;29799;605;6498;1890;126298;951;253512;9425;55565;406464                                                                                                                                                                                                                                                                                                            |
| 9516  | LITAF  | lipopolysaccharide-induced TNF factor                      | 4.4E-05 | 2.0E-02 | 604;4087;2235;55737;2908;23344;4090;27430;23224;4801;9425;28232;84281;3662;93986;80255;253512;2120;51134;5451;4774;11278;3707;1024;960;7700;6774;4297;4155;864;8994;7764;10617;10902;460                                                                                                                                                                                                                                                                                                                                                                                                                                                                                                                                                                                                                                                                                                                                                                                                                                                                                                                                                                                                                                                                                                          |
| 6660  | SOX5   | SOX (sex determining region Y)-box 5                       | 5.0E-05 | 2.3E-02 | 10109;51176;6003;10953;57142;9934;9063;5062;9662;9987;6310;2799;23169;1380;596;10043;10438;5602;5494;965;3911;1520;8738;7867;9846;10423;9962;3597;3295;7014;23433;56255;5607;28951;8935;155066;5294;23180;24140;242;22898;200576;2331;25847;1606                                                                                                                                                                                                                                                                                                                                                                                                                                                                                                                                                                                                                                                                                                                                                                                                                                                                                                                                                                                                                                                  |
| 49854 | ZNF295 | zinc finger protein 295                                    | 5.4E-05 | 2.5E-02 | 604;5151;4089;10009;4216;153222;10346;23224;79884;55074;5451;9730;22850;9019;51111;10363;25820;4862;75519935;7358;55623;4774;6671;6934;6938;4299;4017;1106;1456;134430;958                                                                                                                                                                                                                                                                                                                                                                                                                                                                                                                                                                                                                                                                                                                                                                                                                                                                                                                                                                                                                                                                                                                        |
| 57507 | ZNF608 | zinc finger protein 608                                    | 5.4E-05 | 2.5E-02 | 604;57565;79893;6598;60468;23637;23240;23224;6003;1427;4929;3662;2113;864;51321;4090;153443;63977;8202;8061;8905;4774;4299;6714;3359;3394;4643;944;1847;1820;6772;4830;2060;591                                                                                                                                                                                                                                                                                                                                                                                                                                                                                                                                                                                                                                                                                                                                                                                                                                                                                                                                                                                                                                                                                                                   |
| 6672  | SP100  | SP100 nuclear antigen                                      | 5.8E-05 | 2.6E-02 | 9679;4781;11262;7050;54502;84307;80025;1317;8635;22926;23568;55904;348378;2313;55024;2063;8880;8805;7767;79368;56829;11215;81614;5879;127544;571;7342;1871;23081;9873;55015;7266;11010;27086;23394;3087;84062;4774;22806;3204;861;867;83478;55892;26046;604;4089;9595;7832;23224;9819;2130;1192;55700;221692;81793;5530;10370;2120;9923;1604;9882;3431                                                                                                                                                                                                                                                                                                                                                                                                                                                                                                                                                                                                                                                                                                                                                                                                                                                                                                                                            |
| 56987 | BBX    | bobby sox homolog (Drosophila)                             | 6.5E-05 | 3.0E-02 | 23462;50999;10672;7161;10472;2099;9873;2308;5922;5090;4212;27086;55669;4089;3087;84307;2551;10725;23077;927;7799;10782;22926;6934;2120;4299;1997;286451;4154;5912;4208;7707;81704;6789;599                                                                                                                                                                                                                                                                                                                                                                                                                                                                                                                                                                                                                                                                                                                                                                                                                                                                                                                                                                                                                                                                                                        |
| 6689  | SPIB   | Spi-B transcription factor (Spi-1/PU.1 related)            | 6.6E-05 | 3.0E-02 | 3949;911;489;5191;3309;5494;643;9147;6850;27240;11262;4048;53335;2665;10915;10950;8115;934;2870;7351;2180;240;204851;488;5597;79073;695;640;1362;5790;821                                                                                                                                                                                                                                                                                                                                                                                                                                                                                                                                                                                                                                                                                                                                                                                                                                                                                                                                                                                                                                                                                                                                         |
| 4603  | MYBL1  | v-myb myeloblastosis viral oncogene homolog (avian)-like 1 | 8.2E-05 | 3.7E-02 | 605;604;5884;6830;6929;27022;54014;23224;51282;60468;29780;84056;51088;4090;3662;10725;200734;8452;4794;299;7782;10370;51278;80237;861;1820;1105;9575;57507;2060;5914;651                                                                                                                                                                                                                                                                                                                                                                                                                                                                                                                                                                                                                                                                                                                                                                                                                                                                                                                                                                                                                                                                                                                         |
| 10346 | TRIM22 | tripartite motif-containing 22                             | 1.1E-04 | 4.7E-02 | 5170;55500;84991;83931;51175;1540;25771;3281;2014;64092;6711;64710;54737;6310;3833;8635;10721;55626;1495;1497;51569;5594;117145;9425;1063;57609;64147;51075;79791;2778;94239;596;5151;1121;55737;83548;51512;3146394;3306;3676;9444;11034;28232;6789;84329;894;132158;25800;387921;2762;6671;11215;11083;103;6938;10427;27250;22862;6772;150275;55008;23387;6285;57599;4189;9733;10659;54765;29940;50999;10380;83879;7266;3161;269385;57678;7153;58476;10628;7555;659;89849;10154;9134;84826;9581;151525;1027;51231;9685;8905;8618;1106;776755367;9342;51426;60386;4017;10473;9958;9813;253512;55667;54407;9910;3622;10460;23194;51258;7465;8763;801;51316;84316                                                                                                                                                                                                                                                                                                                                                                                                                                                                                                                                                                                                                                  |
